# Supplementary material for: Analysis of the Potential Relationship between Aging and Pulmonary Fibrosis Based on Transcriptome
Source: MDPI journal article supplement (doi:10.3390/life12121961), 2022-11-23
Supplement: s1 [file s1]

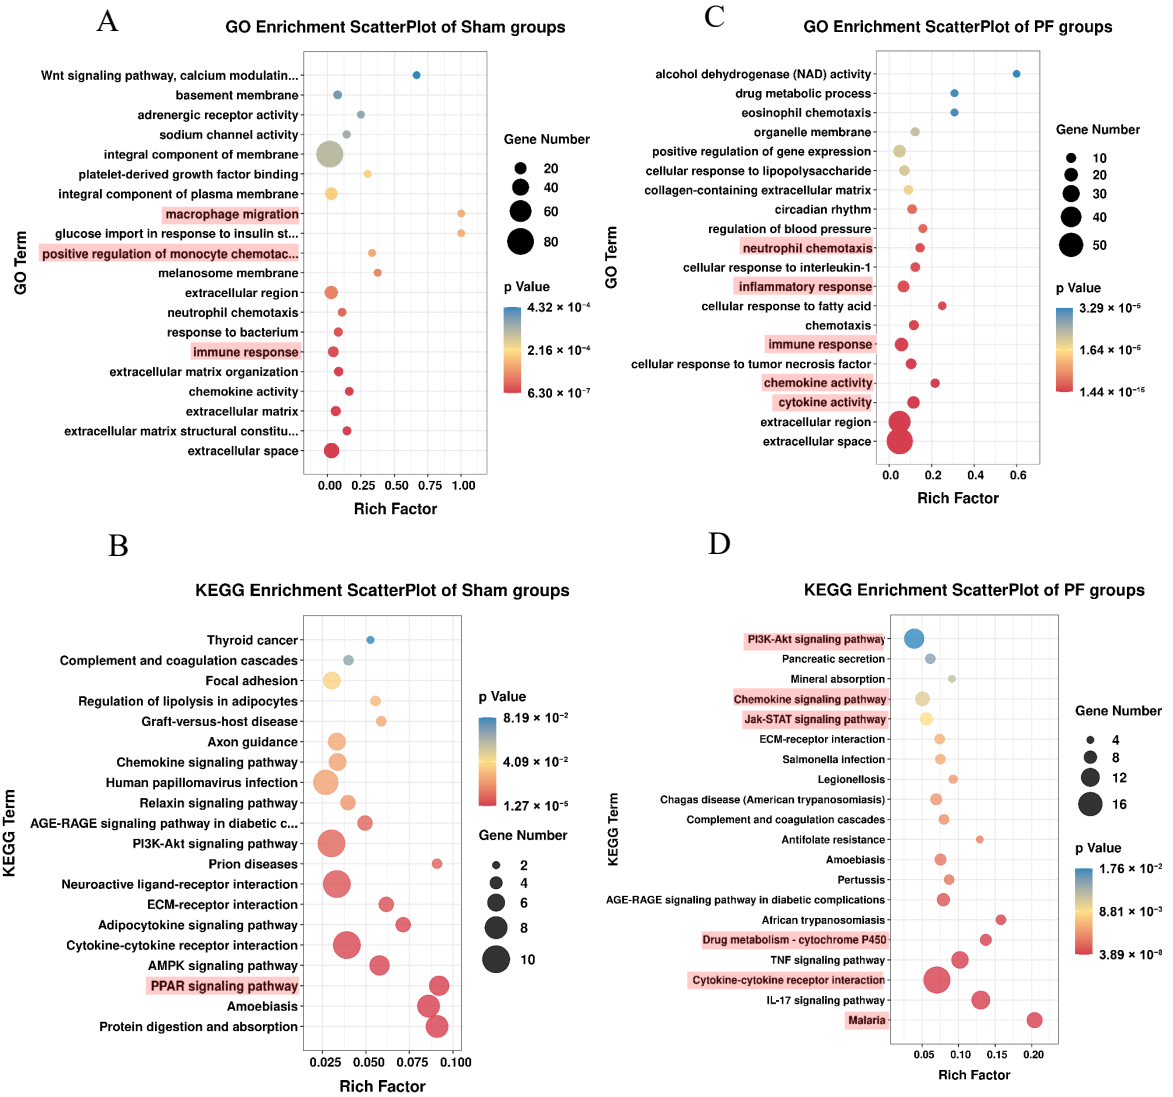

**Figure S1.** GO and KEGG enrichment analysis between old and young groups. (A) GO enrichment scatterplot of o-Sham vs. y-Sham. (B) KEGG enrichment scatterplot of o-Sham vs. y-Sham. (C) GO enrichment scatterplot of O-PF vs. y-PF. (D) KEGG enrichment scatterplot of o-PF vs. y-PF.
