# Supplementary material for: Analysis of the Potential Relationship between Aging and Pulmonary Fibrosis Based on Transcriptome
Source: MDPI journal article supplement (doi:10.3390/life12121961), 2022-11-23
Supplement: s1 [file s1]

**Table S1**

Primer sequences for qPCR assay.

| Gene name     | Sequence                                     | Length (bp) |
|---------------|----------------------------------------------|-------------|
| <i>Gapdh</i>  | Forward primer 5'- GTCGGTGTGAACGGATTGG-3'    | 199         |
|               | Reverse primer 5'- TCCCGTTGATGACCAGCTTC-3'   |             |
| <i>Acta2</i>  | Forward primer 5'-CATCCGACCTTGCTAACGGA-3'    | 366         |
|               | Reverse primer 5'-GTCCAGAGCGACATAGCACA-3'    |             |
| <i>Colla1</i> | Forward primer 5'-GATGGACTCAACGGTCTCCC-3'    | 257         |
|               | Reverse primer 5'-CGGCCACCATCTTGAGACTT-3'    |             |
| <i>Tp53</i>   | Forward primer 5'-CCAGGGAGTGCAAAGAGAGC-3'    | 320         |
|               | Reverse primer 5'- CTGGCCCTTCTTGGTCTTCG-3'   |             |
| <i>Cdkn2a</i> | Forward primer 5'-CGTGCGGTATTTGCGGTATCT-3'   | 178         |
|               | Reverse primer 5'-TCGCGTTGCCAGAAGTGAAG-3'    |             |
| <i>Tgfb1</i>  | Forward primer 5'-ACGGAATACAGGGCTTTCGC-3'    | 298         |
|               | Reverse primer 5'-ATCCACTTCCAACCCAGGTC-3'    |             |
| <i>Il1b</i>   | Forward primer 5'-TGACTTGGGCTGTCCAGATG-3'    | 221         |
|               | Reverse primer 5'-GGTCGTCATCATCCCACGAG-3'    |             |
| <i>Il6</i>    | Forward primer 5'-GCACATGCCGTGACTTAAGACT-3'  | 71          |
|               | Reverse primer 5'-GGACACCCCTTCTGCGTTG-3'     |             |
| <i>Il6</i>    | Forward primer 5'-CCCAACTTCCAATGCTCTCCT-3'   | 265         |
|               | Reverse primer 5'-GGATGGTCTTGGTCCTTAGCC-3'   |             |
| <i>Ccl2</i>   | Forward primer 5'-CAGGTCTCTGTACGCTTCT-3'     | 169         |
|               | Reverse primer 5'-TGCTGCTGGTGATTCTCTTGT-3'   |             |
| <i>Ccl12</i>  | Forward primer 5'-ACCAGATTCAAGTGTTCACCCC -3' | 200         |
|               | Reverse primer 5'-CCAAGTGGTTCATGGAGTCCT -3'  |             |
| <i>Ccl7</i>   | Forward primer 5'-TGCCTGAACAGAAACCAACC -3'   | 95          |
|               | Reverse primer 5'-TAGGACCGTAGTCCACCCATT -3'  |             |
