# Supplementary material for: Analysis of the Potential Relationship between Aging and Pulmonary Fibrosis Based on Transcriptome
Source: Life (Basel). 2022 Nov 23;12(12):1961. doi: 10.3390/life12121961 (PMC9788318; doi:10.3390/life12121961)
Supplement: Supplementary file 1 [file life-12-01961-s001.zip]

Archive with 14 entries (14 files):
- Figure S1-GO and KEGG enrichment analysis between old and young groups.pdf
- Table S1-Primer sequences for qPCR assay..pdf
- Table S10-o-Sham vs y-Sham GO enrichment Gene of Figure S1A.xlsx
- Table S11-o-Sham vs y-Sham KEGG enrichment Gene of Figure S1B.xlsx
- Table S12-o-PF vs y-PF GO enrichment Gene of Figure S1C.xlsx
- Table S13-o-PF vs y-PF KEGG enrichment Gene of Figure S1D.xlsx
- Table S2-Heatmap of Figur 3E.xlsx
- Table S3-y-PF vs y-Sham GO enrichment Gene of Figure 3A.xlsx
- Table S4-o-PF vs o-Sham GO enrichment Gene of Figure 3B.xlsx
- Table S5-y-PF vs y-Sham KEGG enrichment Gene of Figure 3C.xlsx
- Table S6-o-PF vs o-Sham KEGG enrichment Gene of Figure 3D.xlsx
- Table S7-Heatmap of Figur 4B.xlsx
- Table S8-SA set GO enrichment Gene of Figur 4C.xlsx
- Table S9-SA set KEGG enrichment Gene of Figur 4D.xlsx
