# Supplementary material for: Analysis of the Potential Relationship between Aging and Pulmonary Fibrosis Based on Transcriptome
Source: Life (Basel). 2022 Nov 23;12(12):1961. doi: 10.3390/life12121961 (PMC9788318; doi:10.3390/life12121961)
Supplement: Supplementary file 1 [file life-12-01961-s001.zip › Table S3-y-PF vs y-Sham GO enrichment Gene of Figure 3A.xlsx]

## Sheet: Sheet1
GO_ID	GO_Term	GO_function	GO_class	pvalue	Gene_ID	Gene_name	Description	FPKM.Y_PF1	FPKM.Y_PF2	FPKM.Y_PF3	FPKM.Y_Sham1	FPKM.Y_Sham2	FPKM.Y_Sham3	fc	log2(fc)	regulation
GO:0005576	extracellular region	cellular_component	3	5.09037e-13	ENSRNOG00000001955	Retnla	resistin like alpha [Source:RGD Symbol;Acc:68349]	586.112	869.381	2266.69	234.743	302.815	270.878	4.60418	2.20294	up
GO:0005576	extracellular region	cellular_component	3	5.09037e-13	ENSRNOG00000002820	LOC24906	RoBo-1 [Source:RGD Symbol;Acc:3683]	2.59542	1.4901	1.5438	4.072	3.57539	5.97418	0.413264	-1.27486	down
GO:0005576	extracellular region	cellular_component	3	5.09037e-13	ENSRNOG00000002831	Wfikkn2	WAP, follistatin/kazal, immunoglobulin, kunitz and netrin domain containing 2 [Source:RGD Symbol;Acc:1305361]	0.67908	0.636644	0.827013	0.12076	0.21243	0.113778	4.79394	2.26121	up
GO:0005576	extracellular region	cellular_component	3	5.09037e-13	ENSRNOG00000002978	Faslg	Fas ligand [Source:RGD Symbol;Acc:3880]	0.709471	0.473535	1.27202	2.10948	1.83509	3.11962	0.347531	-1.52479	down
GO:0005576	extracellular region	cellular_component	3	5.09037e-13	ENSRNOG00000002984	Bmp15	bone morphogenetic protein 15 [Source:RGD Symbol;Acc:70990]	0.893187	0.650831	0.851556	2.84528	1.94488	1.92699	0.356635	-1.48748	down
GO:0005576	extracellular region	cellular_component	3	5.09037e-13	ENSRNOG00000003897	Col1a1	collagen type I alpha 1 chain [Source:RGD Symbol;Acc:61817]	126.27	249.911	273.591	58.1167	63.4283	51.677	3.75109	1.90731	up
GO:0005576	extracellular region	cellular_component	3	5.09037e-13	ENSRNOG00000004578	Cthrc1	collagen triple helix repeat containing 1 [Source:RGD Symbol;Acc:628801]	3.10308	5.29985	11.6251	2.15384	2.19971	2.10492	3.10105	1.63276	up
GO:0005576	extracellular region	cellular_component	3	5.09037e-13	ENSRNOG00000004610	Lum	lumican [Source:RGD Symbol;Acc:620984]	6.91226	8.37983	35.9543	5.95545	5.12494	5.60998	3.07042	1.61843	up
GO:0005576	extracellular region	cellular_component	3	5.09037e-13	ENSRNOG00000007002	Lif	LIF, interleukin 6 family cytokine [Source:RGD Symbol;Acc:620865]	0.880568	1.01865	1.04408	0.472627	0.322036	0.294568	2.70218	1.43413	up
GO:0005576	extracellular region	cellular_component	3	5.09037e-13	ENSRNOG00000007300	C1qtnf6	C1q and TNF related 6 [Source:RGD Symbol;Acc:1307057]	4.62372	8.24236	7.2877	2.44192	2.31988	3.96621	2.30909	1.20733	up
GO:0005576	extracellular region	cellular_component	3	5.09037e-13	ENSRNOG00000007765	Frzb	frizzled-related protein [Source:RGD Symbol;Acc:1311315]	3.17213	4.68488	12.4008	2.30154	1.72858	2.68979	3.01459	1.59196	up
GO:0005576	extracellular region	cellular_component	3	5.09037e-13	ENSRNOG00000008176	Nppa	natriuretic peptide A [Source:RGD Symbol;Acc:3193]	0	0	4.77912	0	0	0	15930.4	13.9595	up
GO:0005576	extracellular region	cellular_component	3	5.09037e-13	ENSRNOG00000008902	Pon1	paraoxonase 1 [Source:RGD Symbol;Acc:620062]	4.94993	3.6737	3.80655	9.75741	7.38752	8.1471	0.491466	-1.02484	down
GO:0005576	extracellular region	cellular_component	3	5.09037e-13	ENSRNOG00000009342	Fcnb	ficolin B [Source:RGD Symbol;Acc:621222]	6.86838	5.02796	3.18654	12.0512	8.59387	23.5555	0.341237	-1.55115	down
GO:0005576	extracellular region	cellular_component	3	5.09037e-13	ENSRNOG00000010529	Thbs2	thrombospondin 2 [Source:RGD Symbol;Acc:1310979]	2.57939	6.01878	6.82916	1.12399	1.12034	1.18604	4.49727	2.16905	up
GO:0005576	extracellular region	cellular_component	3	5.09037e-13	ENSRNOG00000010906	Ccl5	C-C motif chemokine ligand 5 [Source:RGD Symbol;Acc:69069]	48.3284	41.7605	33.5398	89.039	63.5136	135.101	0.429784	-1.21832	down
GO:0005576	extracellular region	cellular_component	3	5.09037e-13	ENSRNOG00000010935	Cpb2	carboxypeptidase B2 [Source:RGD Symbol;Acc:71035]	0.417813	0.940398	0.194739	0	0	0	5176.5	12.3378	up
GO:0005576	extracellular region	cellular_component	3	5.09037e-13	ENSRNOG00000011557	S100a8	S100 calcium binding protein A8 [Source:RGD Symbol;Acc:620265]	6.86219	14.8878	7.83776	25.2298	19.4616	46.9158	0.322986	-1.63046	down
GO:0005576	extracellular region	cellular_component	3	5.09037e-13	ENSRNOG00000011824	Trh	thyrotropin releasing hormone [Source:RGD Symbol;Acc:3903]	0.198757	0.928469	2.94448	0	0.220139	0.033459	16.0558	4.00502	up
GO:0005576	extracellular region	cellular_component	3	5.09037e-13	ENSRNOG00000013859	Bpifa1	BPI fold containing family A, member 1 [Source:RGD Symbol;Acc:619818]	0.423531	0.205181	928.063	0.160324	0.123339	0.870753	804.469	9.65189	up
GO:0005576	extracellular region	cellular_component	3	5.09037e-13	ENSRNOG00000013917	Igsf10	immunoglobulin superfamily, member 10 [Source:RGD Symbol;Acc:735030]	3.13432	5.68367	5.64416	2.30474	1.81464	2.14471	2.30874	1.20711	up
GO:0005576	extracellular region	cellular_component	3	5.09037e-13	ENSRNOG00000013973	Lcn2	lipocalin 2 [Source:RGD Symbol;Acc:69408]	399.193	738.611	424.407	107.199	115.007	143.758	4.26876	2.09382	up
GO:0005576	extracellular region	cellular_component	3	5.09037e-13	ENSRNOG00000015461	Serpine2	serpin family E member 2 [Source:RGD Symbol;Acc:3748]	21.8704	32.5856	37.2124	17.0684	13.4899	15.117	2.00695	1.00501	up
GO:0005576	extracellular region	cellular_component	3	5.09037e-13	ENSRNOG00000015468	Bpifb1	BPI fold containing family B, member 1 [Source:RGD Symbol;Acc:1563047]	7.72871	0.570241	319.048	0.346988	0.748666	0.129368	267.217	8.06187	up
GO:0005576	extracellular region	cellular_component	3	5.09037e-13	ENSRNOG00000016804	Il25	interleukin 25 [Source:RGD Symbol;Acc:1561632]	0.051869	0.094698	0.050163	0.853721	0.318759	0.438559	0.122114	-3.0337	down
GO:0005576	extracellular region	cellular_component	3	5.09037e-13	ENSRNOG00000016945	Pla2g2a	phospholipase A2 group IIA [Source:RGD Symbol;Acc:620857]	31.8882	19.843	49.1573	12.1527	19.2349	10.06	2.43412	1.2834	up
GO:0005576	extracellular region	cellular_component	3	5.09037e-13	ENSRNOG00000017783	Sfrp1	secreted frizzled-related protein 1 [Source:RGD Symbol;Acc:621074]	1.68002	2.38548	4.44256	1.64961	1.21244	0.920778	2.24913	1.16937	up
GO:0005576	extracellular region	cellular_component	3	5.09037e-13	ENSRNOG00000017873	Sct	secretin [Source:RGD Symbol;Acc:3643]	1.23791	1.93048	2.4561	0.102153	0.550348	0.362674	5.54041	2.46999	up
GO:0005576	extracellular region	cellular_component	3	5.09037e-13	ENSRNOG00000018570	C1qtnf3	C1q and TNF related 3 [Source:RGD Symbol;Acc:1305010]	0.028738	0.238526	1.64239	0.046059	0	0	41.461	5.37368	up
GO:0005576	extracellular region	cellular_component	3	5.09037e-13	ENSRNOG00000020563	Cma1	chymase 1 [Source:RGD Symbol;Acc:2365]	1.06288	11.2426	14.4618	0.948545	1.00838	1.53025	7.6759	2.94034	up
GO:0005576	extracellular region	cellular_component	3	5.09037e-13	ENSRNOG00000021294	Mstn	myostatin [Source:RGD Symbol;Acc:3115]	0.059124	1.35602	0.037337	0	0	0	4841.6	12.2413	up
GO:0005576	extracellular region	cellular_component	3	5.09037e-13	ENSRNOG00000023148	Col11a1	collagen type XI alpha 1 chain [Source:RGD Symbol;Acc:2372]	0.411087	0.52551	0.885577	0.224042	0.278554	0.247892	2.42799	1.27976	up
GO:0005576	extracellular region	cellular_component	3	5.09037e-13	ENSRNOG00000023683	Nog	noggin [Source:RGD Symbol;Acc:3183]	1.3224	2.21724	1.19676	0.464518	0.534484	0.368221	3.46425	1.79254	up
GO:0005576	extracellular region	cellular_component	3	5.09037e-13	ENSRNOG00000024330	Ngp	neutrophilic granule protein [Source:RGD Symbol;Acc:1308994]	0.494763	0.708482	0.378138	1.97936	1.52555	3.28227	0.232996	-2.10162	down
GO:0005576	extracellular region	cellular_component	3	5.09037e-13	ENSRNOG00000025332	Cd109	CD109 molecule [Source:RGD Symbol;Acc:1311287]	0.664014	1.9128	1.14092	0.472451	0.345737	0.370172	3.12846	1.64545	up
GO:0005576	extracellular region	cellular_component	3	5.09037e-13	ENSRNOG00000026053	Grem1	gremlin 1, DAN family BMP antagonist [Source:RGD Symbol;Acc:2359]	0.95987	2.57523	2.25854	0.284014	0.14634	0.159551	9.82132	3.29592	up
GO:0005576	extracellular region	cellular_component	3	5.09037e-13	ENSRNOG00000028548	Ccl9	chemokine (C-C motif) ligand 9 [Source:RGD Symbol;Acc:1310563]	31.354	22.2453	32.1143	12.7972	13.0843	8.17364	2.5169	1.33165	up
GO:0005576	extracellular region	cellular_component	3	5.09037e-13	ENSRNOG00000030210	Fndc1	fibronectin type III domain containing 1 [Source:RGD Symbol;Acc:1310640]	7.27699	15.3231	10.2437	1.47901	0.612771	1.6005	8.89525	3.15303	up
GO:0005576	extracellular region	cellular_component	3	5.09037e-13	ENSRNOG00000031162	Ccl24	C-C motif chemokine ligand 24 [Source:RGD Symbol;Acc:1310245]	2.95267	4.5172	2.6358	1.47836	0.899061	1.85835	2.38579	1.25447	up
GO:0005576	extracellular region	cellular_component	3	5.09037e-13	ENSRNOG00000034290	Ccl21	C-C motif chemokine ligand 21 [Source:RGD Symbol;Acc:1311996]	71.933	100.476	149.957	63.5991	39.5568	57.0998	2.01157	1.00832	up
GO:0005576	extracellular region	cellular_component	3	5.09037e-13	ENSRNOG00000036685	Npb	neuropeptide B [Source:RGD Symbol;Acc:708513]	4.7747	3.3954	4.53054	0.833322	1.38046	0.961871	3.99938	1.99978	up
GO:0005576	extracellular region	cellular_component	3	5.09037e-13	ENSRNOG00000039668	Col8a1	collagen type VIII alpha 1 chain [Source:RGD Symbol;Acc:1309361]	4.90835	6.5363	4.00716	2.58257	2.21751	1.4638	2.46681	1.30265	up
GO:0005576	extracellular region	cellular_component	3	5.09037e-13	ENSRNOG00000043451	Spp1	secreted phosphoprotein 1 [Source:RGD Symbol;Acc:3752]	5.06055	8.53045	47.2968	2.53233	1.09522	0.50064	14.7493	3.88257	up
GO:0005576	extracellular region	cellular_component	3	5.09037e-13	ENSRNOG00000053272	Chi3l1	chitinase 3 like 1 [Source:RGD Symbol;Acc:620874]	78.1203	93.0092	101.602	41.6996	35.3419	56.541	2.04167	1.02975	up
GO:0005576	extracellular region	cellular_component	3	5.09037e-13	ENSRNOG00000053494	Mcpt1l1	mast cell protease 1-like 1 [Source:RGD Symbol;Acc:2321286]	1.12638	24.7448	48.2037	0.458616	0.704795	1.42799	28.5849	4.83718	up
GO:0005615	extracellular space	cellular_component	4	3.96558e-11	ENSRNOG00000001955	Retnla	resistin like alpha [Source:RGD Symbol;Acc:68349]	586.112	869.381	2266.69	234.743	302.815	270.878	4.60418	2.20294	up
GO:0005615	extracellular space	cellular_component	4	3.96558e-11	ENSRNOG00000002640	Serpinb5	serpin family B member 5 [Source:RGD Symbol;Acc:69342]	0	0	0.922211	0	0	0	3074.04	11.5859	up
GO:0005615	extracellular space	cellular_component	4	3.96558e-11	ENSRNOG00000002831	Wfikkn2	WAP, follistatin/kazal, immunoglobulin, kunitz and netrin domain containing 2 [Source:RGD Symbol;Acc:1305361]	0.67908	0.636644	0.827013	0.12076	0.21243	0.113778	4.79394	2.26121	up
GO:0005615	extracellular space	cellular_component	4	3.96558e-11	ENSRNOG00000002978	Faslg	Fas ligand [Source:RGD Symbol;Acc:3880]	0.709471	0.473535	1.27202	2.10948	1.83509	3.11962	0.347531	-1.52479	down
GO:0005615	extracellular space	cellular_component	4	3.96558e-11	ENSRNOG00000002984	Bmp15	bone morphogenetic protein 15 [Source:RGD Symbol;Acc:70990]	0.893187	0.650831	0.851556	2.84528	1.94488	1.92699	0.356635	-1.48748	down
GO:0005615	extracellular space	cellular_component	4	3.96558e-11	ENSRNOG00000003538	Adamts4	ADAM metallopeptidase with thrombospondin type 1 motif, 4 [Source:RGD Symbol;Acc:621242]	0.333219	0.394028	0.42186	0.12392	0.086845	0.17875	2.9501	1.56076	up
GO:0005615	extracellular space	cellular_component	4	3.96558e-11	ENSRNOG00000003897	Col1a1	collagen type I alpha 1 chain [Source:RGD Symbol;Acc:61817]	126.27	249.911	273.591	58.1167	63.4283	51.677	3.75109	1.90731	up
GO:0005615	extracellular space	cellular_component	4	3.96558e-11	ENSRNOG00000004578	Cthrc1	collagen triple helix repeat containing 1 [Source:RGD Symbol;Acc:628801]	3.10308	5.29985	11.6251	2.15384	2.19971	2.10492	3.10105	1.63276	up
GO:0005615	extracellular space	cellular_component	4	3.96558e-11	ENSRNOG00000006093	LRRTM1	leucine rich repeat transmembrane neuronal 1 [Source:RGD Symbol;Acc:1585921]	0.125443	0.154939	0.134368	0	0.01746	0	23.7543	4.57012	up
GO:0005615	extracellular space	cellular_component	4	3.96558e-11	ENSRNOG00000007300	C1qtnf6	C1q and TNF related 6 [Source:RGD Symbol;Acc:1307057]	4.62372	8.24236	7.2877	2.44192	2.31988	3.96621	2.30909	1.20733	up
GO:0005615	extracellular space	cellular_component	4	3.96558e-11	ENSRNOG00000007765	Frzb	frizzled-related protein [Source:RGD Symbol;Acc:1311315]	3.17213	4.68488	12.4008	2.30154	1.72858	2.68979	3.01459	1.59196	up
GO:0005615	extracellular space	cellular_component	4	3.96558e-11	ENSRNOG00000008176	Nppa	natriuretic peptide A [Source:RGD Symbol;Acc:3193]	0	0	4.77912	0	0	0	15930.4	13.9595	up
GO:0005615	extracellular space	cellular_component	4	3.96558e-11	ENSRNOG00000008902	Pon1	paraoxonase 1 [Source:RGD Symbol;Acc:620062]	4.94993	3.6737	3.80655	9.75741	7.38752	8.1471	0.491466	-1.02484	down
GO:0005615	extracellular space	cellular_component	4	3.96558e-11	ENSRNOG00000009907	Mmp8	matrix metallopeptidase 8 [Source:RGD Symbol;Acc:631408]	1.2795	0.827246	0.892774	2.57064	1.58073	4.86069	0.332834	-1.58712	down
GO:0005615	extracellular space	cellular_component	4	3.96558e-11	ENSRNOG00000010478	LOC299282	Ab1-233 [Source:RGD Symbol;Acc:1562479]	2.72995	5.56366	9.32606	1.6003	2.65618	2.36214	2.66214	1.41258	up
GO:0005615	extracellular space	cellular_component	4	3.96558e-11	ENSRNOG00000010906	Ccl5	C-C motif chemokine ligand 5 [Source:RGD Symbol;Acc:69069]	48.3284	41.7605	33.5398	89.039	63.5136	135.101	0.429784	-1.21832	down
GO:0005615	extracellular space	cellular_component	4	3.96558e-11	ENSRNOG00000010935	Cpb2	carboxypeptidase B2 [Source:RGD Symbol;Acc:71035]	0.417813	0.940398	0.194739	0	0	0	5176.5	12.3378	up
GO:0005615	extracellular space	cellular_component	4	3.96558e-11	ENSRNOG00000011483	S100a9	S100 calcium binding protein A9 [Source:RGD Symbol;Acc:620267]	20.221	25.7548	22.6237	43.4388	35.8205	91.6187	0.401453	-1.3167	down
GO:0005615	extracellular space	cellular_component	4	3.96558e-11	ENSRNOG00000011557	S100a8	S100 calcium binding protein A8 [Source:RGD Symbol;Acc:620265]	6.86219	14.8878	7.83776	25.2298	19.4616	46.9158	0.322986	-1.63046	down
GO:0005615	extracellular space	cellular_component	4	3.96558e-11	ENSRNOG00000013304	Arg1	arginase 1 [Source:RGD Symbol;Acc:2150]	8.35733	12.4054	14.4375	5.09255	6.15658	5.0671	2.15737	1.10928	up
GO:0005615	extracellular space	cellular_component	4	3.96558e-11	ENSRNOG00000013859	Bpifa1	BPI fold containing family A, member 1 [Source:RGD Symbol;Acc:619818]	0.423531	0.205181	928.063	0.160324	0.123339	0.870753	804.469	9.65189	up
GO:0005615	extracellular space	cellular_component	4	3.96558e-11	ENSRNOG00000013973	Lcn2	lipocalin 2 [Source:RGD Symbol;Acc:69408]	399.193	738.611	424.407	107.199	115.007	143.758	4.26876	2.09382	up
GO:0005615	extracellular space	cellular_component	4	3.96558e-11	ENSRNOG00000015461	Serpine2	serpin family E member 2 [Source:RGD Symbol;Acc:3748]	21.8704	32.5856	37.2124	17.0684	13.4899	15.117	2.00695	1.00501	up
GO:0005615	extracellular space	cellular_component	4	3.96558e-11	ENSRNOG00000015902	Cpxm2	carboxypeptidase X (M14 family), member 2 [Source:RGD Symbol;Acc:1310955]	14.1973	36.6869	13.8658	3.88967	11.2868	7.934	2.80176	1.48633	up
GO:0005615	extracellular space	cellular_component	4	3.96558e-11	ENSRNOG00000016945	Pla2g2a	phospholipase A2 group IIA [Source:RGD Symbol;Acc:620857]	31.8882	19.843	49.1573	12.1527	19.2349	10.06	2.43412	1.2834	up
GO:0005615	extracellular space	cellular_component	4	3.96558e-11	ENSRNOG00000017477	Mmp23	matrix metallopeptidase 23 [Source:RGD Symbol;Acc:620201]	7.15585	8.3661	9.35647	2.48982	2.59284	4.01865	2.7335	1.45075	up
GO:0005615	extracellular space	cellular_component	4	3.96558e-11	ENSRNOG00000017783	Sfrp1	secreted frizzled-related protein 1 [Source:RGD Symbol;Acc:621074]	1.68002	2.38548	4.44256	1.64961	1.21244	0.920778	2.24913	1.16937	up
GO:0005615	extracellular space	cellular_component	4	3.96558e-11	ENSRNOG00000017873	Sct	secretin [Source:RGD Symbol;Acc:3643]	1.23791	1.93048	2.4561	0.102153	0.550348	0.362674	5.54041	2.46999	up
GO:0005615	extracellular space	cellular_component	4	3.96558e-11	ENSRNOG00000020563	Cma1	chymase 1 [Source:RGD Symbol;Acc:2365]	1.06288	11.2426	14.4618	0.948545	1.00838	1.53025	7.6759	2.94034	up
GO:0005615	extracellular space	cellular_component	4	3.96558e-11	ENSRNOG00000021155	Ctsk	cathepsin K [Source:RGD Symbol;Acc:61810]	8.68873	18.433	39.2286	5.53409	8.14942	6.72412	3.25125	1.70099	up
GO:0005615	extracellular space	cellular_component	4	3.96558e-11	ENSRNOG00000021294	Mstn	myostatin [Source:RGD Symbol;Acc:3115]	0.059124	1.35602	0.037337	0	0	0	4841.6	12.2413	up
GO:0005615	extracellular space	cellular_component	4	3.96558e-11	ENSRNOG00000023148	Col11a1	collagen type XI alpha 1 chain [Source:RGD Symbol;Acc:2372]	0.411087	0.52551	0.885577	0.224042	0.278554	0.247892	2.42799	1.27976	up
GO:0005615	extracellular space	cellular_component	4	3.96558e-11	ENSRNOG00000023683	Nog	noggin [Source:RGD Symbol;Acc:3183]	1.3224	2.21724	1.19676	0.464518	0.534484	0.368221	3.46425	1.79254	up
GO:0005615	extracellular space	cellular_component	4	3.96558e-11	ENSRNOG00000024330	Ngp	neutrophilic granule protein [Source:RGD Symbol;Acc:1308994]	0.494763	0.708482	0.378138	1.97936	1.52555	3.28227	0.232996	-2.10162	down
GO:0005615	extracellular space	cellular_component	4	3.96558e-11	ENSRNOG00000025332	Cd109	CD109 molecule [Source:RGD Symbol;Acc:1311287]	0.664014	1.9128	1.14092	0.472451	0.345737	0.370172	3.12846	1.64545	up
GO:0005615	extracellular space	cellular_component	4	3.96558e-11	ENSRNOG00000026053	Grem1	gremlin 1, DAN family BMP antagonist [Source:RGD Symbol;Acc:2359]	0.95987	2.57523	2.25854	0.284014	0.14634	0.159551	9.82132	3.29592	up
GO:0005615	extracellular space	cellular_component	4	3.96558e-11	ENSRNOG00000026844	Lypd8	LY6/PLAUR domain containing 8 [Source:RGD Symbol;Acc:1586251]	1.52408	1.02682	0.858295	10.5531	1.13515	11.7406	0.145513	-2.78078	down
GO:0005615	extracellular space	cellular_component	4	3.96558e-11	ENSRNOG00000028548	Ccl9	chemokine (C-C motif) ligand 9 [Source:RGD Symbol;Acc:1310563]	31.354	22.2453	32.1143	12.7972	13.0843	8.17364	2.5169	1.33165	up
GO:0005615	extracellular space	cellular_component	4	3.96558e-11	ENSRNOG00000030187	Mmp12	matrix metallopeptidase 12 [Source:RGD Symbol;Acc:620195]	0.8267	3.66773	18.8195	0.329763	0.456892	0.690975	15.7779	3.97983	up
GO:0005615	extracellular space	cellular_component	4	3.96558e-11	ENSRNOG00000031162	Ccl24	C-C motif chemokine ligand 24 [Source:RGD Symbol;Acc:1310245]	2.95267	4.5172	2.6358	1.47836	0.899061	1.85835	2.38579	1.25447	up
GO:0005615	extracellular space	cellular_component	4	3.96558e-11	ENSRNOG00000033109	AC097037		2.69944	1.96136	2.40782	8.19435	6.29043	9.35795	0.296469	-1.75405	down
GO:0005615	extracellular space	cellular_component	4	3.96558e-11	ENSRNOG00000034290	Ccl21	C-C motif chemokine ligand 21 [Source:RGD Symbol;Acc:1311996]	71.933	100.476	149.957	63.5991	39.5568	57.0998	2.01157	1.00832	up
GO:0005615	extracellular space	cellular_component	4	3.96558e-11	ENSRNOG00000039668	Col8a1	collagen type VIII alpha 1 chain [Source:RGD Symbol;Acc:1309361]	4.90835	6.5363	4.00716	2.58257	2.21751	1.4638	2.46681	1.30265	up
GO:0005615	extracellular space	cellular_component	4	3.96558e-11	ENSRNOG00000043451	Spp1	secreted phosphoprotein 1 [Source:RGD Symbol;Acc:3752]	5.06055	8.53045	47.2968	2.53233	1.09522	0.50064	14.7493	3.88257	up
GO:0005615	extracellular space	cellular_component	4	3.96558e-11	ENSRNOG00000045595	Tnfsf9	TNF superfamily member 9 [Source:RGD Symbol;Acc:727974]	1.37669	1.19038	1.76987	0.488094	0.275907	0.330177	3.96364	1.98683	up
GO:0005615	extracellular space	cellular_component	4	3.96558e-11	ENSRNOG00000050998	AABR07044397		0	10.0785	0	0	0	0	33594.9	15.036	up
GO:0005615	extracellular space	cellular_component	4	3.96558e-11	ENSRNOG00000053272	Chi3l1	chitinase 3 like 1 [Source:RGD Symbol;Acc:620874]	78.1203	93.0092	101.602	41.6996	35.3419	56.541	2.04167	1.02975	up
GO:0005615	extracellular space	cellular_component	4	3.96558e-11	ENSRNOG00000053494	Mcpt1l1	mast cell protease 1-like 1 [Source:RGD Symbol;Acc:2321286]	1.12638	24.7448	48.2037	0.458616	0.704795	1.42799	28.5849	4.83718	up
GO:0005581	collagen trimer	cellular_component	4	1.39568e-06	ENSRNOG00000003897	Col1a1	collagen type I alpha 1 chain [Source:RGD Symbol;Acc:61817]	126.27	249.911	273.591	58.1167	63.4283	51.677	3.75109	1.90731	up
GO:0005581	collagen trimer	cellular_component	4	1.39568e-06	ENSRNOG00000004578	Cthrc1	collagen triple helix repeat containing 1 [Source:RGD Symbol;Acc:628801]	3.10308	5.29985	11.6251	2.15384	2.19971	2.10492	3.10105	1.63276	up
GO:0005581	collagen trimer	cellular_component	4	1.39568e-06	ENSRNOG00000007300	C1qtnf6	C1q and TNF related 6 [Source:RGD Symbol;Acc:1307057]	4.62372	8.24236	7.2877	2.44192	2.31988	3.96621	2.30909	1.20733	up
GO:0005581	collagen trimer	cellular_component	4	1.39568e-06	ENSRNOG00000009342	Fcnb	ficolin B [Source:RGD Symbol;Acc:621222]	6.86838	5.02796	3.18654	12.0512	8.59387	23.5555	0.341237	-1.55115	down
GO:0005581	collagen trimer	cellular_component	4	1.39568e-06	ENSRNOG00000018570	C1qtnf3	C1q and TNF related 3 [Source:RGD Symbol;Acc:1305010]	0.028738	0.238526	1.64239	0.046059	0	0	41.461	5.37368	up
GO:0005581	collagen trimer	cellular_component	4	1.39568e-06	ENSRNOG00000023148	Col11a1	collagen type XI alpha 1 chain [Source:RGD Symbol;Acc:2372]	0.411087	0.52551	0.885577	0.224042	0.278554	0.247892	2.42799	1.27976	up
GO:0005581	collagen trimer	cellular_component	4	1.39568e-06	ENSRNOG00000039197	LOC108348074	collagen alpha-1(XV) chain-like [Source:RGD Symbol;Acc:11464459]	27.4934	28.1683	11.323	10.5648	7.14882	12.7016	2.20234	1.13904	up
GO:0005581	collagen trimer	cellular_component	4	1.39568e-06	ENSRNOG00000039668	Col8a1	collagen type VIII alpha 1 chain [Source:RGD Symbol;Acc:1309361]	4.90835	6.5363	4.00716	2.58257	2.21751	1.4638	2.46681	1.30265	up
GO:1902617	response to fluoride	biological_process	6	1.59336e-06	ENSRNOG00000003897	Col1a1	collagen type I alpha 1 chain [Source:RGD Symbol;Acc:61817]	126.27	249.911	273.591	58.1167	63.4283	51.677	3.75109	1.90731	up
GO:1902617	response to fluoride	biological_process	6	1.59336e-06	ENSRNOG00000008902	Pon1	paraoxonase 1 [Source:RGD Symbol;Acc:620062]	4.94993	3.6737	3.80655	9.75741	7.38752	8.1471	0.491466	-1.02484	down
GO:1902617	response to fluoride	biological_process	6	1.59336e-06	ENSRNOG00000015410	Aspnl1	asporin-like 1 [Source:RGD Symbol;Acc:9278606]	5.47451	7.94654	9.04123	1.47136	1.33332	2.2312	4.46045	2.15719	up
GO:1902617	response to fluoride	biological_process	6	1.59336e-06	ENSRNOG00000050431	Aspn	asporin [Source:RGD Symbol;Acc:1549776]	4.35686	7.07341	9.51473	1.40718	1.43709	1.43879	4.8902	2.28989	up
GO:0019835	cytolysis	biological_process	4	3.14956e-06	ENSRNOG00000000562	Prf1	perforin 1 [Source:RGD Symbol;Acc:708463]	11.7317	8.28855	6.91728	21.9426	12.0857	30.3654	0.418325	-1.2573	down
GO:0019835	cytolysis	biological_process	4	3.14956e-06	ENSRNOG00000034139	Lyc2	lysozyme C type 2 [Source:RGD Symbol;Acc:1593616]	97.5211	111.852	81.7107	260.831	343.193	266.941	0.334208	-1.58118	down
GO:0019835	cytolysis	biological_process	4	3.14956e-06	ENSRNOG00000045973	Gzmb	granzyme B [Source:RGD Symbol;Acc:620018]	2.25316	1.81994	1.79573	5.58483	4.29643	10.1425	0.293093	-1.77057	down
GO:0019835	cytolysis	biological_process	4	3.14956e-06	ENSRNOG00000049976	Gzmbl2	Granzyme B-like 2 [Source:RGD Symbol;Acc:2320097]	1.20768	0.713789	0.784046	3.07314	1.12515	4.83558	0.299486	-1.73944	down
GO:0001649	osteoblast differentiation	biological_process	6	8.01423e-06	ENSRNOG00000003897	Col1a1	collagen type I alpha 1 chain [Source:RGD Symbol;Acc:61817]	126.27	249.911	273.591	58.1167	63.4283	51.677	3.75109	1.90731	up
GO:0001649	osteoblast differentiation	biological_process	6	8.01423e-06	ENSRNOG00000004440	Fignl1	fidgetin-like 1 [Source:RGD Symbol;Acc:1307112]	1.25489	1.98283	1.32425	0.558773	0.422531	0.693617	2.72369	1.44556	up
GO:0001649	osteoblast differentiation	biological_process	6	8.01423e-06	ENSRNOG00000008816	Gpnmb	glycoprotein nmb [Source:RGD Symbol;Acc:71008]	193.456	246.629	303.418	84.0387	88.9556	65.1415	3.12218	1.64255	up
GO:0001649	osteoblast differentiation	biological_process	6	8.01423e-06	ENSRNOG00000010905	Dlx5	distal-less homeobox 5 [Source:RGD Symbol;Acc:2506]	0.333893	0.067122	0.257194	0	0	0	2194.03	11.0994	up
GO:0001649	osteoblast differentiation	biological_process	6	8.01423e-06	ENSRNOG00000017783	Sfrp1	secreted frizzled-related protein 1 [Source:RGD Symbol;Acc:621074]	1.68002	2.38548	4.44256	1.64961	1.21244	0.920778	2.24913	1.16937	up
GO:0001649	osteoblast differentiation	biological_process	6	8.01423e-06	ENSRNOG00000023683	Nog	noggin [Source:RGD Symbol;Acc:3183]	1.3224	2.21724	1.19676	0.464518	0.534484	0.368221	3.46425	1.79254	up
GO:0001649	osteoblast differentiation	biological_process	6	8.01423e-06	ENSRNOG00000025120	Gli1	GLI family zinc finger 1 [Source:RGD Symbol;Acc:621673]	3.07771	4.09095	3.67171	1.56395	1.68971	1.52278	2.26955	1.18241	up
GO:0001649	osteoblast differentiation	biological_process	6	8.01423e-06	ENSRNOG00000043451	Spp1	secreted phosphoprotein 1 [Source:RGD Symbol;Acc:3752]	5.06055	8.53045	47.2968	2.53233	1.09522	0.50064	14.7493	3.88257	up
GO:0071356	cellular response to tumor necrosis factor	biological_process	8	8.86427e-06	ENSRNOG00000003897	Col1a1	collagen type I alpha 1 chain [Source:RGD Symbol;Acc:61817]	126.27	249.911	273.591	58.1167	63.4283	51.677	3.75109	1.90731	up
GO:0071356	cellular response to tumor necrosis factor	biological_process	8	8.86427e-06	ENSRNOG00000010906	Ccl5	C-C motif chemokine ligand 5 [Source:RGD Symbol;Acc:69069]	48.3284	41.7605	33.5398	89.039	63.5136	135.101	0.429784	-1.21832	down
GO:0071356	cellular response to tumor necrosis factor	biological_process	8	8.86427e-06	ENSRNOG00000013973	Lcn2	lipocalin 2 [Source:RGD Symbol;Acc:69408]	399.193	738.611	424.407	107.199	115.007	143.758	4.26876	2.09382	up
GO:0071356	cellular response to tumor necrosis factor	biological_process	8	8.86427e-06	ENSRNOG00000014170	Dbn1	drebrin 1 [Source:RGD Symbol;Acc:70885]	10.9214	12.9572	10.2577	6.1132	4.51819	6.14413	2.03489	1.02495	up
GO:0071356	cellular response to tumor necrosis factor	biological_process	8	8.86427e-06	ENSRNOG00000017783	Sfrp1	secreted frizzled-related protein 1 [Source:RGD Symbol;Acc:621074]	1.68002	2.38548	4.44256	1.64961	1.21244	0.920778	2.24913	1.16937	up
GO:0071356	cellular response to tumor necrosis factor	biological_process	8	8.86427e-06	ENSRNOG00000018598	Ankrd1	ankyrin repeat domain 1 [Source:RGD Symbol;Acc:61989]	52.1948	92.124	57.3024	26.6198	31.8094	17.7761	2.64577	1.40369	up
GO:0071356	cellular response to tumor necrosis factor	biological_process	8	8.86427e-06	ENSRNOG00000028548	Ccl9	chemokine (C-C motif) ligand 9 [Source:RGD Symbol;Acc:1310563]	31.354	22.2453	32.1143	12.7972	13.0843	8.17364	2.5169	1.33165	up
GO:0071356	cellular response to tumor necrosis factor	biological_process	8	8.86427e-06	ENSRNOG00000031162	Ccl24	C-C motif chemokine ligand 24 [Source:RGD Symbol;Acc:1310245]	2.95267	4.5172	2.6358	1.47836	0.899061	1.85835	2.38579	1.25447	up
GO:0071356	cellular response to tumor necrosis factor	biological_process	8	8.86427e-06	ENSRNOG00000034290	Ccl21	C-C motif chemokine ligand 21 [Source:RGD Symbol;Acc:1311996]	71.933	100.476	149.957	63.5991	39.5568	57.0998	2.01157	1.00832	up
GO:0071356	cellular response to tumor necrosis factor	biological_process	8	8.86427e-06	ENSRNOG00000053272	Chi3l1	chitinase 3 like 1 [Source:RGD Symbol;Acc:620874]	78.1203	93.0092	101.602	41.6996	35.3419	56.541	2.04167	1.02975	up
GO:0071347	cellular response to interleukin-1	biological_process	8	1.22425e-05	ENSRNOG00000010906	Ccl5	C-C motif chemokine ligand 5 [Source:RGD Symbol;Acc:69069]	48.3284	41.7605	33.5398	89.039	63.5136	135.101	0.429784	-1.21832	down
GO:0071347	cellular response to interleukin-1	biological_process	8	1.22425e-05	ENSRNOG00000013973	Lcn2	lipocalin 2 [Source:RGD Symbol;Acc:69408]	399.193	738.611	424.407	107.199	115.007	143.758	4.26876	2.09382	up
GO:0071347	cellular response to interleukin-1	biological_process	8	1.22425e-05	ENSRNOG00000017783	Sfrp1	secreted frizzled-related protein 1 [Source:RGD Symbol;Acc:621074]	1.68002	2.38548	4.44256	1.64961	1.21244	0.920778	2.24913	1.16937	up
GO:0071347	cellular response to interleukin-1	biological_process	8	1.22425e-05	ENSRNOG00000018598	Ankrd1	ankyrin repeat domain 1 [Source:RGD Symbol;Acc:61989]	52.1948	92.124	57.3024	26.6198	31.8094	17.7761	2.64577	1.40369	up
GO:0071347	cellular response to interleukin-1	biological_process	8	1.22425e-05	ENSRNOG00000028548	Ccl9	chemokine (C-C motif) ligand 9 [Source:RGD Symbol;Acc:1310563]	31.354	22.2453	32.1143	12.7972	13.0843	8.17364	2.5169	1.33165	up
GO:0071347	cellular response to interleukin-1	biological_process	8	1.22425e-05	ENSRNOG00000031162	Ccl24	C-C motif chemokine ligand 24 [Source:RGD Symbol;Acc:1310245]	2.95267	4.5172	2.6358	1.47836	0.899061	1.85835	2.38579	1.25447	up
GO:0071347	cellular response to interleukin-1	biological_process	8	1.22425e-05	ENSRNOG00000034290	Ccl21	C-C motif chemokine ligand 21 [Source:RGD Symbol;Acc:1311996]	71.933	100.476	149.957	63.5991	39.5568	57.0998	2.01157	1.00832	up
GO:0071347	cellular response to interleukin-1	biological_process	8	1.22425e-05	ENSRNOG00000053272	Chi3l1	chitinase 3 like 1 [Source:RGD Symbol;Acc:620874]	78.1203	93.0092	101.602	41.6996	35.3419	56.541	2.04167	1.02975	up
GO:0005509	calcium ion binding	molecular_function	7	1.75794e-05	ENSRNOG00000000562	Prf1	perforin 1 [Source:RGD Symbol;Acc:708463]	11.7317	8.28855	6.91728	21.9426	12.0857	30.3654	0.418325	-1.2573	down
GO:0005509	calcium ion binding	molecular_function	7	1.75794e-05	ENSRNOG00000004275	Egfl6	EGF-like-domain, multiple 6 [Source:RGD Symbol;Acc:1563321]	82.0957	83.7678	48.7801	33.0382	31.1522	23.1532	2.45746	1.29717	up
GO:0005509	calcium ion binding	molecular_function	7	1.75794e-05	ENSRNOG00000006426	Syt1	synaptotagmin 1 [Source:RGD Symbol;Acc:3803]	0.535581	0.254328	0.726439	1.20032	1.83951	1.33849	0.346332	-1.52977	down
GO:0005509	calcium ion binding	molecular_function	7	1.75794e-05	ENSRNOG00000007574	Padi2	peptidyl arginine deiminase 2 [Source:RGD Symbol;Acc:3288]	1.05408	0.426038	0.672806	1.90207	1.87646	2.07766	0.367632	-1.44367	down
GO:0005509	calcium ion binding	molecular_function	7	1.75794e-05	ENSRNOG00000007923	Cgref1	cell growth regulator with EF hand domain 1 [Source:RGD Symbol;Acc:620801]	1.21469	2.12039	3.42954	0.553423	0.325379	0.60227	4.56738	2.19137	up
GO:0005509	calcium ion binding	molecular_function	7	1.75794e-05	ENSRNOG00000008902	Pon1	paraoxonase 1 [Source:RGD Symbol;Acc:620062]	4.94993	3.6737	3.80655	9.75741	7.38752	8.1471	0.491466	-1.02484	down
GO:0005509	calcium ion binding	molecular_function	7	1.75794e-05	ENSRNOG00000009951	Aif1l	allograft inflammatory factor 1-like [Source:RGD Symbol;Acc:1305081]	1.94247	4.30351	3.17287	1.2613	0.881366	0.925637	3.06973	1.61811	up
GO:0005509	calcium ion binding	molecular_function	7	1.75794e-05	ENSRNOG00000010529	Thbs2	thrombospondin 2 [Source:RGD Symbol;Acc:1310979]	2.57939	6.01878	6.82916	1.12399	1.12034	1.18604	4.49727	2.16905	up
GO:0005509	calcium ion binding	molecular_function	7	1.75794e-05	ENSRNOG00000011483	S100a9	S100 calcium binding protein A9 [Source:RGD Symbol;Acc:620267]	20.221	25.7548	22.6237	43.4388	35.8205	91.6187	0.401453	-1.3167	down
GO:0005509	calcium ion binding	molecular_function	7	1.75794e-05	ENSRNOG00000011557	S100a8	S100 calcium binding protein A8 [Source:RGD Symbol;Acc:620265]	6.86219	14.8878	7.83776	25.2298	19.4616	46.9158	0.322986	-1.63046	down
GO:0005509	calcium ion binding	molecular_function	7	1.75794e-05	ENSRNOG00000012094	Ltbp2	latent transforming growth factor beta binding protein 2 [Source:RGD Symbol;Acc:68380]	104.178	142.203	67.6816	40.4369	33.2928	42.9138	2.6925	1.42895	up
GO:0005509	calcium ion binding	molecular_function	7	1.75794e-05	ENSRNOG00000013481	Cdh11	cadherin 11 [Source:RGD Symbol;Acc:619742]	13.9402	23.495	20.613	7.8593	11.181	7.5212	2.18543	1.12791	up
GO:0005509	calcium ion binding	molecular_function	7	1.75794e-05	ENSRNOG00000013704	Cps1	carbamoyl-phosphate synthase 1 [Source:RGD Symbol;Acc:2395]	0.0296366	0.0318274	0.0321218	0	0	0	311.953	8.28518	up
GO:0005509	calcium ion binding	molecular_function	7	1.75794e-05	ENSRNOG00000015220	Crtac1	cartilage acidic protein 1 [Source:RGD Symbol;Acc:621085]	0.628424	0.672292	0.653296	0.111445	0.0423887	0.0200992	11.2343	3.48984	up
GO:0005509	calcium ion binding	molecular_function	7	1.75794e-05	ENSRNOG00000015408	Vil1	villin 1 [Source:RGD Symbol;Acc:1307048]	0.852	0.23051	0.408527	1.89595	1.63924	3.09661	0.224832	-2.15308	down
GO:0005509	calcium ion binding	molecular_function	7	1.75794e-05	ENSRNOG00000015410	Aspnl1	asporin-like 1 [Source:RGD Symbol;Acc:9278606]	5.47451	7.94654	9.04123	1.47136	1.33332	2.2312	4.46045	2.15719	up
GO:0005509	calcium ion binding	molecular_function	7	1.75794e-05	ENSRNOG00000016632	Dsg3	desmoglein 3 [Source:RGD Symbol;Acc:1592103]	0.730607	1.46764	1.2487	0.486876	0.583329	0.606895	2.0553	1.03935	up
GO:0005509	calcium ion binding	molecular_function	7	1.75794e-05	ENSRNOG00000016945	Pla2g2a	phospholipase A2 group IIA [Source:RGD Symbol;Acc:620857]	31.8882	19.843	49.1573	12.1527	19.2349	10.06	2.43412	1.2834	up
GO:0005509	calcium ion binding	molecular_function	7	1.75794e-05	ENSRNOG00000017060	Ryr2	ryanodine receptor 2 [Source:RGD Symbol;Acc:620314]	0.285075	0.300051	1.47817	0.173643	0.049516	0.188027	5.01792	2.32709	up
GO:0005509	calcium ion binding	molecular_function	7	1.75794e-05	ENSRNOG00000029212	Vcan	versican [Source:RGD Symbol;Acc:619940]	2.24955	4.3322	4.42122	1.48965	1.11479	1.8692	2.45951	1.29837	up
GO:0005509	calcium ion binding	molecular_function	7	1.75794e-05	ENSRNOG00000030187	Mmp12	matrix metallopeptidase 12 [Source:RGD Symbol;Acc:620195]	0.8267	3.66773	18.8195	0.329763	0.456892	0.690975	15.7779	3.97983	up
GO:0005509	calcium ion binding	molecular_function	7	1.75794e-05	ENSRNOG00000033837	Cdh9	cadherin 9 [Source:RGD Symbol;Acc:1308343]	0	0	0	0.210953	0.147315	0.112743	0.000636928	-10.6166	down
GO:0005509	calcium ion binding	molecular_function	7	1.75794e-05	ENSRNOG00000050431	Aspn	asporin [Source:RGD Symbol;Acc:1549776]	4.35686	7.07341	9.51473	1.40718	1.43709	1.43879	4.8902	2.28989	up
GO:0005509	calcium ion binding	molecular_function	7	1.75794e-05	ENSRNOG00000056746	Tchh	trichohyalin [Source:RGD Symbol;Acc:1309635]	4.07548	3.16984	1.73282	1.19183	1.02438	0.811988	2.96485	1.56796	up
GO:0002376	immune system process	biological_process	3	2.02783e-05	ENSRNOG00000006263	Sh2d1a	SH2 domain containing 1A [Source:RGD Symbol;Acc:1562408]	0.762223	0.828636	1.31519	3.17378	2.3662	3.14758	0.334508	-1.57989	down
GO:0002376	immune system process	biological_process	3	2.02783e-05	ENSRNOG00000009342	Fcnb	ficolin B [Source:RGD Symbol;Acc:621222]	6.86838	5.02796	3.18654	12.0512	8.59387	23.5555	0.341237	-1.55115	down
GO:0002376	immune system process	biological_process	3	2.02783e-05	ENSRNOG00000011557	S100a8	S100 calcium binding protein A8 [Source:RGD Symbol;Acc:620265]	6.86219	14.8878	7.83776	25.2298	19.4616	46.9158	0.322986	-1.63046	down
GO:0002376	immune system process	biological_process	3	2.02783e-05	ENSRNOG00000013304	Arg1	arginase 1 [Source:RGD Symbol;Acc:2150]	8.35733	12.4054	14.4375	5.09255	6.15658	5.0671	2.15737	1.10928	up
GO:0002376	immune system process	biological_process	3	2.02783e-05	ENSRNOG00000013859	Bpifa1	BPI fold containing family A, member 1 [Source:RGD Symbol;Acc:619818]	0.423531	0.205181	928.063	0.160324	0.123339	0.870753	804.469	9.65189	up
GO:0002376	immune system process	biological_process	3	2.02783e-05	ENSRNOG00000013973	Lcn2	lipocalin 2 [Source:RGD Symbol;Acc:69408]	399.193	738.611	424.407	107.199	115.007	143.758	4.26876	2.09382	up
GO:0002376	immune system process	biological_process	3	2.02783e-05	ENSRNOG00000017414	Irf7	interferon regulatory factor 7 [Source:RGD Symbol;Acc:1307828]	50.0909	39.3499	31.835	103.562	77.9961	166.957	0.347979	-1.52293	down
GO:0002376	immune system process	biological_process	3	2.02783e-05	ENSRNOG00000021546	Sit1	signaling threshold regulating transmembrane adaptor 1 [Source:RGD Symbol;Acc:1559919]	1.07776	0.720659	1.29333	2.51028	1.88185	3.02458	0.416862	-1.26236	down
GO:0002376	immune system process	biological_process	3	2.02783e-05	ENSRNOG00000022067	Tlr5	toll-like receptor 5 [Source:RGD Symbol;Acc:631351]	3.79088	2.48157	3.94515	1.49858	1.60221	1.77419	2.09592	1.06759	up
GO:0002376	immune system process	biological_process	3	2.02783e-05	ENSRNOG00000033220	Oas1f	2 ' -5 ' oligoadenylate synthetase 1K [Source:RGD Symbol;Acc:1359279]	5.23307	3.89105	3.42366	9.0953	7.36568	11.0517	0.456073	-1.13266	down
GO:0002376	immune system process	biological_process	3	2.02783e-05	ENSRNOG00000050998	AABR07044397		0	10.0785	0	0	0	0	33594.9	15.036	up
GO:0006508	proteolysis	biological_process	7	2.55036e-05	ENSRNOG00000001715	Ece2	endothelin-converting enzyme 2 [Source:RGD Symbol;Acc:1303039]	1.446	2.21214	2.62232	0.919415	0.708033	1.19424	2.22578	1.15431	up
GO:0006508	proteolysis	biological_process	7	2.55036e-05	ENSRNOG00000003538	Adamts4	ADAM metallopeptidase with thrombospondin type 1 motif, 4 [Source:RGD Symbol;Acc:621242]	0.333219	0.394028	0.42186	0.12392	0.086845	0.17875	2.9501	1.56076	up
GO:0006508	proteolysis	biological_process	7	2.55036e-05	ENSRNOG00000009530	Uchl3	ubiquitin C-terminal hydrolase L3 [Source:RGD Symbol;Acc:1561196]	6.13125	11.4867	12.6096	3.90755	4.19954	6.06125	2.13346	1.09319	up
GO:0006508	proteolysis	biological_process	7	2.55036e-05	ENSRNOG00000009907	Mmp8	matrix metallopeptidase 8 [Source:RGD Symbol;Acc:631408]	1.2795	0.827246	0.892774	2.57064	1.58073	4.86069	0.332834	-1.58712	down
GO:0006508	proteolysis	biological_process	7	2.55036e-05	ENSRNOG00000010603	Gzma	granzyme A [Source:RGD Symbol;Acc:628640]	8.31047	7.27624	8.60605	18.3746	12.8989	25.6912	0.424698	-1.23549	down
GO:0006508	proteolysis	biological_process	7	2.55036e-05	ENSRNOG00000010661	Gzmk	granzyme K [Source:RGD Symbol;Acc:68401]	10.175	6.88223	6.29562	18.5387	15.2216	32.7479	0.351126	-1.50994	down
GO:0006508	proteolysis	biological_process	7	2.55036e-05	ENSRNOG00000010935	Cpb2	carboxypeptidase B2 [Source:RGD Symbol;Acc:71035]	0.417813	0.940398	0.194739	0	0	0	5176.5	12.3378	up
GO:0006508	proteolysis	biological_process	7	2.55036e-05	ENSRNOG00000013704	Cps1	carbamoyl-phosphate synthase 1 [Source:RGD Symbol;Acc:2395]	0.0296366	0.0318274	0.0321218	0	0	0	311.953	8.28518	up
GO:0006508	proteolysis	biological_process	7	2.55036e-05	ENSRNOG00000015902	Cpxm2	carboxypeptidase X (M14 family), member 2 [Source:RGD Symbol;Acc:1310955]	14.1973	36.6869	13.8658	3.88967	11.2868	7.934	2.80176	1.48633	up
GO:0006508	proteolysis	biological_process	7	2.55036e-05	ENSRNOG00000017477	Mmp23	matrix metallopeptidase 23 [Source:RGD Symbol;Acc:620201]	7.15585	8.3661	9.35647	2.48982	2.59284	4.01865	2.7335	1.45075	up
GO:0006508	proteolysis	biological_process	7	2.55036e-05	ENSRNOG00000017783	Sfrp1	secreted frizzled-related protein 1 [Source:RGD Symbol;Acc:621074]	1.68002	2.38548	4.44256	1.64961	1.21244	0.920778	2.24913	1.16937	up
GO:0006508	proteolysis	biological_process	7	2.55036e-05	ENSRNOG00000020206	Ctsd	cathepsin D [Source:RGD Symbol;Acc:621511]	548	744.981	848.372	316.023	357.412	293.272	2.2151	1.14737	up
GO:0006508	proteolysis	biological_process	7	2.55036e-05	ENSRNOG00000020563	Cma1	chymase 1 [Source:RGD Symbol;Acc:2365]	1.06288	11.2426	14.4618	0.948545	1.00838	1.53025	7.6759	2.94034	up
GO:0006508	proteolysis	biological_process	7	2.55036e-05	ENSRNOG00000021155	Ctsk	cathepsin K [Source:RGD Symbol;Acc:61810]	8.68873	18.433	39.2286	5.53409	8.14942	6.72412	3.25125	1.70099	up
GO:0006508	proteolysis	biological_process	7	2.55036e-05	ENSRNOG00000030187	Mmp12	matrix metallopeptidase 12 [Source:RGD Symbol;Acc:620195]	0.8267	3.66773	18.8195	0.329763	0.456892	0.690975	15.7779	3.97983	up
GO:0006508	proteolysis	biological_process	7	2.55036e-05	ENSRNOG00000030530	Gzmm	granzyme M [Source:RGD Symbol;Acc:620022]	15.5155	10.2956	10.456	27.0434	19.0509	36.6771	0.43816	-1.19047	down
GO:0006508	proteolysis	biological_process	7	2.55036e-05	ENSRNOG00000045973	Gzmb	granzyme B [Source:RGD Symbol;Acc:620018]	2.25316	1.81994	1.79573	5.58483	4.29643	10.1425	0.293093	-1.77057	down
GO:0006508	proteolysis	biological_process	7	2.55036e-05	ENSRNOG00000046764	Tmprss11a	transmembrane serine protease 11A [Source:RGD Symbol;Acc:1596322]	0	0	9.5822	0	0	0	31940.7	14.9631	up
GO:0006508	proteolysis	biological_process	7	2.55036e-05	ENSRNOG00000049976	Gzmbl2	Granzyme B-like 2 [Source:RGD Symbol;Acc:2320097]	1.20768	0.713789	0.784046	3.07314	1.12515	4.83558	0.299486	-1.73944	down
GO:0006508	proteolysis	biological_process	7	2.55036e-05	ENSRNOG00000051854	Enpep	glutamyl aminopeptidase [Source:RGD Symbol;Acc:621228]	18.815	14.6776	10.9005	33.2081	30.5951	30.1322	0.472593	-1.08133	down
GO:0006508	proteolysis	biological_process	7	2.55036e-05	ENSRNOG00000053494	Mcpt1l1	mast cell protease 1-like 1 [Source:RGD Symbol;Acc:2321286]	1.12638	24.7448	48.2037	0.458616	0.704795	1.42799	28.5849	4.83718	up
GO:0006508	proteolysis	biological_process	7	2.55036e-05	ENSRNOG00000061484	Adamts2	ADAM metallopeptidase with thrombospondin type 1 motif, 2 [Source:RGD Symbol;Acc:1565950]	25.0103	33.9663	18.8295	11.0781	12.1949	11.6513	2.22785	1.15565	up
GO:0009615	response to virus	biological_process	7	2.86546e-05	ENSRNOG00000001963	Mx2	MX dynamin like GTPase 2 [Source:RGD Symbol;Acc:628821]	30.1994	23.4836	17.5537	60.3679	35.706	65.2539	0.441565	-1.1793	down
GO:0009615	response to virus	biological_process	7	2.86546e-05	ENSRNOG00000007539	Rsad2	radical S-adenosyl methionine domain containing 2 [Source:RGD Symbol;Acc:620495]	4.92785	5.735	5.77652	12.456	7.58066	14.5645	0.475111	-1.07366	down
GO:0009615	response to virus	biological_process	7	2.86546e-05	ENSRNOG00000010906	Ccl5	C-C motif chemokine ligand 5 [Source:RGD Symbol;Acc:69069]	48.3284	41.7605	33.5398	89.039	63.5136	135.101	0.429784	-1.21832	down
GO:0009615	response to virus	biological_process	7	2.86546e-05	ENSRNOG00000013973	Lcn2	lipocalin 2 [Source:RGD Symbol;Acc:69408]	399.193	738.611	424.407	107.199	115.007	143.758	4.26876	2.09382	up
GO:0009615	response to virus	biological_process	7	2.86546e-05	ENSRNOG00000019050	Ifit1	interferon-induced protein with tetratricopeptide repeats 1 [Source:RGD Symbol;Acc:620599]	10.0484	9.65548	5.40845	21.5586	30.666	25.6832	0.322334	-1.63337	down
GO:0009615	response to virus	biological_process	7	2.86546e-05	ENSRNOG00000022839	Ifit3	interferon-induced protein with tetratricopeptide repeats 3 [Source:RGD Symbol;Acc:1359681]	6.58621	5.63265	5.42336	15.6292	10.5641	23.771	0.353096	-1.50187	down
GO:0009615	response to virus	biological_process	7	2.86546e-05	ENSRNOG00000033220	Oas1f	2 ' -5 ' oligoadenylate synthetase 1K [Source:RGD Symbol;Acc:1359279]	5.23307	3.89105	3.42366	9.0953	7.36568	11.0517	0.456073	-1.13266	down
GO:0031012	extracellular matrix	cellular_component	4	3.55058e-05	ENSRNOG00000003897	Col1a1	collagen type I alpha 1 chain [Source:RGD Symbol;Acc:61817]	126.27	249.911	273.591	58.1167	63.4283	51.677	3.75109	1.90731	up
GO:0031012	extracellular matrix	cellular_component	4	3.55058e-05	ENSRNOG00000004275	Egfl6	EGF-like-domain, multiple 6 [Source:RGD Symbol;Acc:1563321]	82.0957	83.7678	48.7801	33.0382	31.1522	23.1532	2.45746	1.29717	up
GO:0031012	extracellular matrix	cellular_component	4	3.55058e-05	ENSRNOG00000004578	Cthrc1	collagen triple helix repeat containing 1 [Source:RGD Symbol;Acc:628801]	3.10308	5.29985	11.6251	2.15384	2.19971	2.10492	3.10105	1.63276	up
GO:0031012	extracellular matrix	cellular_component	4	3.55058e-05	ENSRNOG00000004610	Lum	lumican [Source:RGD Symbol;Acc:620984]	6.91226	8.37983	35.9543	5.95545	5.12494	5.60998	3.07042	1.61843	up
GO:0031012	extracellular matrix	cellular_component	4	3.55058e-05	ENSRNOG00000006093	LRRTM1	leucine rich repeat transmembrane neuronal 1 [Source:RGD Symbol;Acc:1585921]	0.125443	0.154939	0.134368	0	0.01746	0	23.7543	4.57012	up
GO:0031012	extracellular matrix	cellular_component	4	3.55058e-05	ENSRNOG00000009907	Mmp8	matrix metallopeptidase 8 [Source:RGD Symbol;Acc:631408]	1.2795	0.827246	0.892774	2.57064	1.58073	4.86069	0.332834	-1.58712	down
GO:0031012	extracellular matrix	cellular_component	4	3.55058e-05	ENSRNOG00000010529	Thbs2	thrombospondin 2 [Source:RGD Symbol;Acc:1310979]	2.57939	6.01878	6.82916	1.12399	1.12034	1.18604	4.49727	2.16905	up
GO:0031012	extracellular matrix	cellular_component	4	3.55058e-05	ENSRNOG00000017477	Mmp23	matrix metallopeptidase 23 [Source:RGD Symbol;Acc:620201]	7.15585	8.3661	9.35647	2.48982	2.59284	4.01865	2.7335	1.45075	up
GO:0031012	extracellular matrix	cellular_component	4	3.55058e-05	ENSRNOG00000023148	Col11a1	collagen type XI alpha 1 chain [Source:RGD Symbol;Acc:2372]	0.411087	0.52551	0.885577	0.224042	0.278554	0.247892	2.42799	1.27976	up
GO:0031012	extracellular matrix	cellular_component	4	3.55058e-05	ENSRNOG00000030187	Mmp12	matrix metallopeptidase 12 [Source:RGD Symbol;Acc:620195]	0.8267	3.66773	18.8195	0.329763	0.456892	0.690975	15.7779	3.97983	up
GO:0031012	extracellular matrix	cellular_component	4	3.55058e-05	ENSRNOG00000039668	Col8a1	collagen type VIII alpha 1 chain [Source:RGD Symbol;Acc:1309361]	4.90835	6.5363	4.00716	2.58257	2.21751	1.4638	2.46681	1.30265	up
GO:0031012	extracellular matrix	cellular_component	4	3.55058e-05	ENSRNOG00000061484	Adamts2	ADAM metallopeptidase with thrombospondin type 1 motif, 2 [Source:RGD Symbol;Acc:1565950]	25.0103	33.9663	18.8295	11.0781	12.1949	11.6513	2.22785	1.15565	up
GO:0051607	defense response to virus	biological_process	5	4.07697e-05	ENSRNOG00000000562	Prf1	perforin 1 [Source:RGD Symbol;Acc:708463]	11.7317	8.28855	6.91728	21.9426	12.0857	30.3654	0.418325	-1.2573	down
GO:0051607	defense response to virus	biological_process	5	4.07697e-05	ENSRNOG00000001369	Oas1a	2'-5' oligoadenylate synthetase 1A [Source:RGD Symbol;Acc:621760]	10.8024	8.5894	7.75613	18.5757	13.2011	25.5218	0.473796	-1.07766	down
GO:0051607	defense response to virus	biological_process	5	4.07697e-05	ENSRNOG00000007539	Rsad2	radical S-adenosyl methionine domain containing 2 [Source:RGD Symbol;Acc:620495]	4.92785	5.735	5.77652	12.456	7.58066	14.5645	0.475111	-1.07366	down
GO:0051607	defense response to virus	biological_process	5	4.07697e-05	ENSRNOG00000017414	Irf7	interferon regulatory factor 7 [Source:RGD Symbol;Acc:1307828]	50.0909	39.3499	31.835	103.562	77.9961	166.957	0.347979	-1.52293	down
GO:0051607	defense response to virus	biological_process	5	4.07697e-05	ENSRNOG00000019050	Ifit1	interferon-induced protein with tetratricopeptide repeats 1 [Source:RGD Symbol;Acc:620599]	10.0484	9.65548	5.40845	21.5586	30.666	25.6832	0.322334	-1.63337	down
GO:0051607	defense response to virus	biological_process	5	4.07697e-05	ENSRNOG00000022839	Ifit3	interferon-induced protein with tetratricopeptide repeats 3 [Source:RGD Symbol;Acc:1359681]	6.58621	5.63265	5.42336	15.6292	10.5641	23.771	0.353096	-1.50187	down
GO:0051607	defense response to virus	biological_process	5	4.07697e-05	ENSRNOG00000033220	Oas1f	2 ' -5 ' oligoadenylate synthetase 1K [Source:RGD Symbol;Acc:1359279]	5.23307	3.89105	3.42366	9.0953	7.36568	11.0517	0.456073	-1.13266	down
GO:0051607	defense response to virus	biological_process	5	4.07697e-05	ENSRNOG00000049282	Oas2	2'-5' oligoadenylate synthetase 2 [Source:RGD Symbol;Acc:1359697]	5.96024	3.32075	3.13407	12.3504	5.63243	14.1955	0.385821	-1.374	down
GO:0051607	defense response to virus	biological_process	5	4.07697e-05	ENSRNOG00000049994	Ifi44l	interferon-induced protein 44-like [Source:RGD Symbol;Acc:1595861]	9.90108	8.27266	7.21319	19.4744	12.343	20.2472	0.487605	-1.03621	down
GO:0008233	peptidase activity	molecular_function	5	5.39598e-05	ENSRNOG00000009530	Uchl3	ubiquitin C-terminal hydrolase L3 [Source:RGD Symbol;Acc:1561196]	6.13125	11.4867	12.6096	3.90755	4.19954	6.06125	2.13346	1.09319	up
GO:0008233	peptidase activity	molecular_function	5	5.39598e-05	ENSRNOG00000009907	Mmp8	matrix metallopeptidase 8 [Source:RGD Symbol;Acc:631408]	1.2795	0.827246	0.892774	2.57064	1.58073	4.86069	0.332834	-1.58712	down
GO:0008233	peptidase activity	molecular_function	5	5.39598e-05	ENSRNOG00000010603	Gzma	granzyme A [Source:RGD Symbol;Acc:628640]	8.31047	7.27624	8.60605	18.3746	12.8989	25.6912	0.424698	-1.23549	down
GO:0008233	peptidase activity	molecular_function	5	5.39598e-05	ENSRNOG00000010661	Gzmk	granzyme K [Source:RGD Symbol;Acc:68401]	10.175	6.88223	6.29562	18.5387	15.2216	32.7479	0.351126	-1.50994	down
GO:0008233	peptidase activity	molecular_function	5	5.39598e-05	ENSRNOG00000010935	Cpb2	carboxypeptidase B2 [Source:RGD Symbol;Acc:71035]	0.417813	0.940398	0.194739	0	0	0	5176.5	12.3378	up
GO:0008233	peptidase activity	molecular_function	5	5.39598e-05	ENSRNOG00000017477	Mmp23	matrix metallopeptidase 23 [Source:RGD Symbol;Acc:620201]	7.15585	8.3661	9.35647	2.48982	2.59284	4.01865	2.7335	1.45075	up
GO:0008233	peptidase activity	molecular_function	5	5.39598e-05	ENSRNOG00000020206	Ctsd	cathepsin D [Source:RGD Symbol;Acc:621511]	548	744.981	848.372	316.023	357.412	293.272	2.2151	1.14737	up
GO:0008233	peptidase activity	molecular_function	5	5.39598e-05	ENSRNOG00000020563	Cma1	chymase 1 [Source:RGD Symbol;Acc:2365]	1.06288	11.2426	14.4618	0.948545	1.00838	1.53025	7.6759	2.94034	up
GO:0008233	peptidase activity	molecular_function	5	5.39598e-05	ENSRNOG00000021155	Ctsk	cathepsin K [Source:RGD Symbol;Acc:61810]	8.68873	18.433	39.2286	5.53409	8.14942	6.72412	3.25125	1.70099	up
GO:0008233	peptidase activity	molecular_function	5	5.39598e-05	ENSRNOG00000030187	Mmp12	matrix metallopeptidase 12 [Source:RGD Symbol;Acc:620195]	0.8267	3.66773	18.8195	0.329763	0.456892	0.690975	15.7779	3.97983	up
GO:0008233	peptidase activity	molecular_function	5	5.39598e-05	ENSRNOG00000030530	Gzmm	granzyme M [Source:RGD Symbol;Acc:620022]	15.5155	10.2956	10.456	27.0434	19.0509	36.6771	0.43816	-1.19047	down
GO:0008233	peptidase activity	molecular_function	5	5.39598e-05	ENSRNOG00000045973	Gzmb	granzyme B [Source:RGD Symbol;Acc:620018]	2.25316	1.81994	1.79573	5.58483	4.29643	10.1425	0.293093	-1.77057	down
GO:0008233	peptidase activity	molecular_function	5	5.39598e-05	ENSRNOG00000046764	Tmprss11a	transmembrane serine protease 11A [Source:RGD Symbol;Acc:1596322]	0	0	9.5822	0	0	0	31940.7	14.9631	up
GO:0008233	peptidase activity	molecular_function	5	5.39598e-05	ENSRNOG00000049976	Gzmbl2	Granzyme B-like 2 [Source:RGD Symbol;Acc:2320097]	1.20768	0.713789	0.784046	3.07314	1.12515	4.83558	0.299486	-1.73944	down
GO:0008233	peptidase activity	molecular_function	5	5.39598e-05	ENSRNOG00000051854	Enpep	glutamyl aminopeptidase [Source:RGD Symbol;Acc:621228]	18.815	14.6776	10.9005	33.2081	30.5951	30.1322	0.472593	-1.08133	down
GO:0008233	peptidase activity	molecular_function	5	5.39598e-05	ENSRNOG00000053494	Mcpt1l1	mast cell protease 1-like 1 [Source:RGD Symbol;Acc:2321286]	1.12638	24.7448	48.2037	0.458616	0.704795	1.42799	28.5849	4.83718	up
GO:0008233	peptidase activity	molecular_function	5	5.39598e-05	ENSRNOG00000061484	Adamts2	ADAM metallopeptidase with thrombospondin type 1 motif, 2 [Source:RGD Symbol;Acc:1565950]	25.0103	33.9663	18.8295	11.0781	12.1949	11.6513	2.22785	1.15565	up
GO:0051988	regulation of attachment of spindle microtubules to kinetochore	biological_process	8	6.22606e-05	ENSRNOG00000004487	Nek2	NIMA (never in mitosis gene a)-related kinase 2-like 1 [Source:RGD Symbol;Acc:1582899]	1.56838	1.81988	3.87627	0.970926	0.827985	1.08667	2.51752	1.33201	up
GO:0051988	regulation of attachment of spindle microtubules to kinetochore	biological_process	8	6.22606e-05	ENSRNOG00000009334	Knstrn	kinetochore-localized astrin/SPAG5 binding protein [Source:RGD Symbol;Acc:1303240]	2.00772	2.65504	3.12539	0.916384	0.953023	0.774118	2.94612	1.55882	up
GO:0051988	regulation of attachment of spindle microtubules to kinetochore	biological_process	8	6.22606e-05	ENSRNOG00000024365	Ect2	epithelial cell transforming 2 [Source:RGD Symbol;Acc:1308524]	1.29219	2.68213	3.60527	1.27175	1.0084	0.842832	2.42703	1.27919	up
GO:0010273	detoxification of copper ion	biological_process	5	6.22606e-05	ENSRNOG00000025764	AC128848		30.5978	27.9313	24.8656	8.8741	12.1067	11.3119	2.58246	1.36875	up
GO:0010273	detoxification of copper ion	biological_process	5	6.22606e-05	ENSRNOG00000038047	Mt1	metallothionein 1 [Source:RGD Symbol;Acc:3117]	6.48477	4.81513	5.14986	2.71678	1.77605	2.19561	2.45943	1.29833	up
GO:0010273	detoxification of copper ion	biological_process	5	6.22606e-05	ENSRNOG00000043098	Mt2A	metallothionein 2A [Source:RGD Symbol;Acc:1592345]	22.5488	25.925	34.0743	11.7397	14.0395	14.0706	2.07148	1.05066	up
GO:0060076	excitatory synapse	cellular_component	4	7.24143e-05	ENSRNOG00000006093	LRRTM1	leucine rich repeat transmembrane neuronal 1 [Source:RGD Symbol;Acc:1585921]	0.125443	0.154939	0.134368	0	0.01746	0	23.7543	4.57012	up
GO:0060076	excitatory synapse	cellular_component	4	7.24143e-05	ENSRNOG00000006426	Syt1	synaptotagmin 1 [Source:RGD Symbol;Acc:3803]	0.535581	0.254328	0.726439	1.20032	1.83951	1.33849	0.346332	-1.52977	down
GO:0060076	excitatory synapse	cellular_component	4	7.24143e-05	ENSRNOG00000014006	Neto1	neuropilin and tolloid like 1 [Source:RGD Symbol;Acc:1566269]	0.083617	0.086844	0.08791	0	0	0	861.237	9.75027	up
GO:0060076	excitatory synapse	cellular_component	4	7.24143e-05	ENSRNOG00000014170	Dbn1	drebrin 1 [Source:RGD Symbol;Acc:70885]	10.9214	12.9572	10.2577	6.1132	4.51819	6.14413	2.03489	1.02495	up
GO:0060076	excitatory synapse	cellular_component	4	7.24143e-05	ENSRNOG00000031536	Syndig1	synapse differentiation inducing 1 [Source:RGD Symbol;Acc:1310753]	3.11116	2.77016	1.96867	5.58928	6.40608	5.16542	0.457438	-1.12835	down
GO:0005201	extracellular matrix structural constituent	molecular_function	4	8.20265e-05	ENSRNOG00000001469	Eln	elastin [Source:RGD Symbol;Acc:67394]	1211.58	1294.86	280.806	159.291	311.13	177.739	4.30024	2.10442	up
GO:0005201	extracellular matrix structural constituent	molecular_function	4	8.20265e-05	ENSRNOG00000003897	Col1a1	collagen type I alpha 1 chain [Source:RGD Symbol;Acc:61817]	126.27	249.911	273.591	58.1167	63.4283	51.677	3.75109	1.90731	up
GO:0005201	extracellular matrix structural constituent	molecular_function	4	8.20265e-05	ENSRNOG00000011292	NEWGENE_621351	collagen, type I, alpha 2 [Source:RGD Symbol;Acc:9452897]	134.308	280.185	220.805	65.4149	127.389	75.4797	2.36801	1.24368	up
GO:0005201	extracellular matrix structural constituent	molecular_function	4	8.20265e-05	ENSRNOG00000023148	Col11a1	collagen type XI alpha 1 chain [Source:RGD Symbol;Acc:2372]	0.411087	0.52551	0.885577	0.224042	0.278554	0.247892	2.42799	1.27976	up
GO:0005201	extracellular matrix structural constituent	molecular_function	4	8.20265e-05	ENSRNOG00000039668	Col8a1	collagen type VIII alpha 1 chain [Source:RGD Symbol;Acc:1309361]	4.90835	6.5363	4.00716	2.58257	2.21751	1.4638	2.46681	1.30265	up
GO:0005201	extracellular matrix structural constituent	molecular_function	4	8.20265e-05	ENSRNOG00000052925	NEWGENE_621351	collagen, type I, alpha 2 [Source:RGD Symbol;Acc:9452897]	44.2462	78.2478	94.465	34.5066	31.6576	31.9137	2.21211	1.14542	up
GO:0006955	immune response	biological_process	4	9.32714e-05	ENSRNOG00000001369	Oas1a	2'-5' oligoadenylate synthetase 1A [Source:RGD Symbol;Acc:621760]	10.8024	8.5894	7.75613	18.5757	13.2011	25.5218	0.473796	-1.07766	down
GO:0006955	immune response	biological_process	4	9.32714e-05	ENSRNOG00000002978	Faslg	Fas ligand [Source:RGD Symbol;Acc:3880]	0.709471	0.473535	1.27202	2.10948	1.83509	3.11962	0.347531	-1.52479	down
GO:0006955	immune response	biological_process	4	9.32714e-05	ENSRNOG00000007002	Lif	LIF, interleukin 6 family cytokine [Source:RGD Symbol;Acc:620865]	0.880568	1.01865	1.04408	0.472627	0.322036	0.294568	2.70218	1.43413	up
GO:0006955	immune response	biological_process	4	9.32714e-05	ENSRNOG00000010906	Ccl5	C-C motif chemokine ligand 5 [Source:RGD Symbol;Acc:69069]	48.3284	41.7605	33.5398	89.039	63.5136	135.101	0.429784	-1.21832	down
GO:0006955	immune response	biological_process	4	9.32714e-05	ENSRNOG00000024115	C6	complement C6 [Source:RGD Symbol;Acc:2238]	3.17798	27.2636	27.2519	1.49621	1.42027	3.4023	9.13047	3.19069	up
GO:0006955	immune response	biological_process	4	9.32714e-05	ENSRNOG00000028548	Ccl9	chemokine (C-C motif) ligand 9 [Source:RGD Symbol;Acc:1310563]	31.354	22.2453	32.1143	12.7972	13.0843	8.17364	2.5169	1.33165	up
GO:0006955	immune response	biological_process	4	9.32714e-05	ENSRNOG00000031162	Ccl24	C-C motif chemokine ligand 24 [Source:RGD Symbol;Acc:1310245]	2.95267	4.5172	2.6358	1.47836	0.899061	1.85835	2.38579	1.25447	up
GO:0006955	immune response	biological_process	4	9.32714e-05	ENSRNOG00000033109	AC097037		2.69944	1.96136	2.40782	8.19435	6.29043	9.35795	0.296469	-1.75405	down
GO:0006955	immune response	biological_process	4	9.32714e-05	ENSRNOG00000033220	Oas1f	2 ' -5 ' oligoadenylate synthetase 1K [Source:RGD Symbol;Acc:1359279]	5.23307	3.89105	3.42366	9.0953	7.36568	11.0517	0.456073	-1.13266	down
GO:0006955	immune response	biological_process	4	9.32714e-05	ENSRNOG00000033234	Ccrl2	C-C motif chemokine receptor like 2 [Source:RGD Symbol;Acc:1311811]	7.3731	6.65768	5.30731	12.9877	11.6706	14.5202	0.493589	-1.01862	down
GO:0006955	immune response	biological_process	4	9.32714e-05	ENSRNOG00000034290	Ccl21	C-C motif chemokine ligand 21 [Source:RGD Symbol;Acc:1311996]	71.933	100.476	149.957	63.5991	39.5568	57.0998	2.01157	1.00832	up
GO:0006955	immune response	biological_process	4	9.32714e-05	ENSRNOG00000045595	Tnfsf9	TNF superfamily member 9 [Source:RGD Symbol;Acc:727974]	1.37669	1.19038	1.76987	0.488094	0.275907	0.330177	3.96364	1.98683	up
GO:0006955	immune response	biological_process	4	9.32714e-05	ENSRNOG00000048239	Cxcr1	C-X-C motif chemokine receptor 1 [Source:RGD Symbol;Acc:2905]	12.0581	12.2964	6.19431	5.02716	3.39089	4.10572	2.43926	1.28645	up
GO:0006955	immune response	biological_process	4	9.32714e-05	ENSRNOG00000049282	Oas2	2'-5' oligoadenylate synthetase 2 [Source:RGD Symbol;Acc:1359697]	5.96024	3.32075	3.13407	12.3504	5.63243	14.1955	0.385821	-1.374	down
GO:0006955	immune response	biological_process	4	9.32714e-05	ENSRNOG00000049994	Ifi44l	interferon-induced protein 44-like [Source:RGD Symbol;Acc:1595861]	9.90108	8.27266	7.21319	19.4744	12.343	20.2472	0.487605	-1.03621	down
GO:0006955	immune response	biological_process	4	9.32714e-05	ENSRNOG00000050998	AABR07044397		0	10.0785	0	0	0	0	33594.9	15.036	up
GO:0061037	negative regulation of cartilage development	biological_process	7	0.000107761	ENSRNOG00000007765	Frzb	frizzled-related protein [Source:RGD Symbol;Acc:1311315]	3.17213	4.68488	12.4008	2.30154	1.72858	2.68979	3.01459	1.59196	up
GO:0061037	negative regulation of cartilage development	biological_process	7	0.000107761	ENSRNOG00000021155	Ctsk	cathepsin K [Source:RGD Symbol;Acc:61810]	8.68873	18.433	39.2286	5.53409	8.14942	6.72412	3.25125	1.70099	up
GO:0061037	negative regulation of cartilage development	biological_process	7	0.000107761	ENSRNOG00000023683	Nog	noggin [Source:RGD Symbol;Acc:3183]	1.3224	2.21724	1.19676	0.464518	0.534484	0.368221	3.46425	1.79254	up
GO:0070098	chemokine-mediated signaling pathway	biological_process	7	0.000142412	ENSRNOG00000010906	Ccl5	C-C motif chemokine ligand 5 [Source:RGD Symbol;Acc:69069]	48.3284	41.7605	33.5398	89.039	63.5136	135.101	0.429784	-1.21832	down
GO:0070098	chemokine-mediated signaling pathway	biological_process	7	0.000142412	ENSRNOG00000028548	Ccl9	chemokine (C-C motif) ligand 9 [Source:RGD Symbol;Acc:1310563]	31.354	22.2453	32.1143	12.7972	13.0843	8.17364	2.5169	1.33165	up
GO:0070098	chemokine-mediated signaling pathway	biological_process	7	0.000142412	ENSRNOG00000031162	Ccl24	C-C motif chemokine ligand 24 [Source:RGD Symbol;Acc:1310245]	2.95267	4.5172	2.6358	1.47836	0.899061	1.85835	2.38579	1.25447	up
GO:0070098	chemokine-mediated signaling pathway	biological_process	7	0.000142412	ENSRNOG00000033234	Ccrl2	C-C motif chemokine receptor like 2 [Source:RGD Symbol;Acc:1311811]	7.3731	6.65768	5.30731	12.9877	11.6706	14.5202	0.493589	-1.01862	down
GO:0070098	chemokine-mediated signaling pathway	biological_process	7	0.000142412	ENSRNOG00000034290	Ccl21	C-C motif chemokine ligand 21 [Source:RGD Symbol;Acc:1311996]	71.933	100.476	149.957	63.5991	39.5568	57.0998	2.01157	1.00832	up
GO:0070098	chemokine-mediated signaling pathway	biological_process	7	0.000142412	ENSRNOG00000048239	Cxcr1	C-X-C motif chemokine receptor 1 [Source:RGD Symbol;Acc:2905]	12.0581	12.2964	6.19431	5.02716	3.39089	4.10572	2.43926	1.28645	up
GO:0048545	response to steroid hormone	biological_process	6	0.000155284	ENSRNOG00000003897	Col1a1	collagen type I alpha 1 chain [Source:RGD Symbol;Acc:61817]	126.27	249.911	273.591	58.1167	63.4283	51.677	3.75109	1.90731	up
GO:0048545	response to steroid hormone	biological_process	6	0.000155284	ENSRNOG00000013304	Arg1	arginase 1 [Source:RGD Symbol;Acc:2150]	8.35733	12.4054	14.4375	5.09255	6.15658	5.0671	2.15737	1.10928	up
GO:0048545	response to steroid hormone	biological_process	6	0.000155284	ENSRNOG00000013704	Cps1	carbamoyl-phosphate synthase 1 [Source:RGD Symbol;Acc:2395]	0.0296366	0.0318274	0.0321218	0	0	0	311.953	8.28518	up
GO:0048545	response to steroid hormone	biological_process	6	0.000155284	ENSRNOG00000017786	Acta1	actin, alpha 1, skeletal muscle [Source:RGD Symbol;Acc:2025]	2.06127	3.95623	4.72239	0.202559	1.39766	0.697384	4.67439	2.22478	up
GO:0048545	response to steroid hormone	biological_process	6	0.000155284	ENSRNOG00000043451	Spp1	secreted phosphoprotein 1 [Source:RGD Symbol;Acc:3752]	5.06055	8.53045	47.2968	2.53233	1.09522	0.50064	14.7493	3.88257	up
GO:0030593	neutrophil chemotaxis	biological_process	7	0.000157886	ENSRNOG00000011483	S100a9	S100 calcium binding protein A9 [Source:RGD Symbol;Acc:620267]	20.221	25.7548	22.6237	43.4388	35.8205	91.6187	0.401453	-1.3167	down
GO:0030593	neutrophil chemotaxis	biological_process	7	0.000157886	ENSRNOG00000011557	S100a8	S100 calcium binding protein A8 [Source:RGD Symbol;Acc:620265]	6.86219	14.8878	7.83776	25.2298	19.4616	46.9158	0.322986	-1.63046	down
GO:0030593	neutrophil chemotaxis	biological_process	7	0.000157886	ENSRNOG00000028548	Ccl9	chemokine (C-C motif) ligand 9 [Source:RGD Symbol;Acc:1310563]	31.354	22.2453	32.1143	12.7972	13.0843	8.17364	2.5169	1.33165	up
GO:0030593	neutrophil chemotaxis	biological_process	7	0.000157886	ENSRNOG00000031162	Ccl24	C-C motif chemokine ligand 24 [Source:RGD Symbol;Acc:1310245]	2.95267	4.5172	2.6358	1.47836	0.899061	1.85835	2.38579	1.25447	up
GO:0030593	neutrophil chemotaxis	biological_process	7	0.000157886	ENSRNOG00000034290	Ccl21	C-C motif chemokine ligand 21 [Source:RGD Symbol;Acc:1311996]	71.933	100.476	149.957	63.5991	39.5568	57.0998	2.01157	1.00832	up
GO:0030593	neutrophil chemotaxis	biological_process	7	0.000157886	ENSRNOG00000048239	Cxcr1	C-X-C motif chemokine receptor 1 [Source:RGD Symbol;Acc:2905]	12.0581	12.2964	6.19431	5.02716	3.39089	4.10572	2.43926	1.28645	up
GO:0070488	neutrophil aggregation	biological_process	8	0.000218769	ENSRNOG00000011483	S100a9	S100 calcium binding protein A9 [Source:RGD Symbol;Acc:620267]	20.221	25.7548	22.6237	43.4388	35.8205	91.6187	0.401453	-1.3167	down
GO:0070488	neutrophil aggregation	biological_process	8	0.000218769	ENSRNOG00000011557	S100a8	S100 calcium binding protein A8 [Source:RGD Symbol;Acc:620265]	6.86219	14.8878	7.83776	25.2298	19.4616	46.9158	0.322986	-1.63046	down
GO:0035634	response to stilbenoid	biological_process	7	0.000218769	ENSRNOG00000036984	Slco1a1	solute carrier organic anion transporter family, member 1a1 [Source:RGD Symbol;Acc:3700]	0.317929	0.628859	0.396718	0.058162	0.110115	0.019966	7.13708	2.83533	up
GO:0035634	response to stilbenoid	biological_process	7	0.000218769	ENSRNOG00000037198	Usp18	ubiquitin specific peptidase 18 [Source:RGD Symbol;Acc:1359153]	13.1785	11.7285	9.52241	26.2124	16.1245	31.1509	0.468505	-1.09387	down
GO:0005125	cytokine activity	molecular_function	7	0.000367824	ENSRNOG00000002978	Faslg	Fas ligand [Source:RGD Symbol;Acc:3880]	0.709471	0.473535	1.27202	2.10948	1.83509	3.11962	0.347531	-1.52479	down
GO:0005125	cytokine activity	molecular_function	7	0.000367824	ENSRNOG00000002984	Bmp15	bone morphogenetic protein 15 [Source:RGD Symbol;Acc:70990]	0.893187	0.650831	0.851556	2.84528	1.94488	1.92699	0.356635	-1.48748	down
GO:0005125	cytokine activity	molecular_function	7	0.000367824	ENSRNOG00000007002	Lif	LIF, interleukin 6 family cytokine [Source:RGD Symbol;Acc:620865]	0.880568	1.01865	1.04408	0.472627	0.322036	0.294568	2.70218	1.43413	up
GO:0005125	cytokine activity	molecular_function	7	0.000367824	ENSRNOG00000010906	Ccl5	C-C motif chemokine ligand 5 [Source:RGD Symbol;Acc:69069]	48.3284	41.7605	33.5398	89.039	63.5136	135.101	0.429784	-1.21832	down
GO:0005125	cytokine activity	molecular_function	7	0.000367824	ENSRNOG00000016804	Il25	interleukin 25 [Source:RGD Symbol;Acc:1561632]	0.051869	0.094698	0.050163	0.853721	0.318759	0.438559	0.122114	-3.0337	down
GO:0005125	cytokine activity	molecular_function	7	0.000367824	ENSRNOG00000021294	Mstn	myostatin [Source:RGD Symbol;Acc:3115]	0.059124	1.35602	0.037337	0	0	0	4841.6	12.2413	up
GO:0005125	cytokine activity	molecular_function	7	0.000367824	ENSRNOG00000026053	Grem1	gremlin 1, DAN family BMP antagonist [Source:RGD Symbol;Acc:2359]	0.95987	2.57523	2.25854	0.284014	0.14634	0.159551	9.82132	3.29592	up
GO:0005125	cytokine activity	molecular_function	7	0.000367824	ENSRNOG00000043451	Spp1	secreted phosphoprotein 1 [Source:RGD Symbol;Acc:3752]	5.06055	8.53045	47.2968	2.53233	1.09522	0.50064	14.7493	3.88257	up
GO:0005125	cytokine activity	molecular_function	7	0.000367824	ENSRNOG00000045595	Tnfsf9	TNF superfamily member 9 [Source:RGD Symbol;Acc:727974]	1.37669	1.19038	1.76987	0.488094	0.275907	0.330177	3.96364	1.98683	up
GO:0043392	negative regulation of DNA binding	biological_process	7	0.000396562	ENSRNOG00000002831	Wfikkn2	WAP, follistatin/kazal, immunoglobulin, kunitz and netrin domain containing 2 [Source:RGD Symbol;Acc:1305361]	0.67908	0.636644	0.827013	0.12076	0.21243	0.113778	4.79394	2.26121	up
GO:0043392	negative regulation of DNA binding	biological_process	7	0.000396562	ENSRNOG00000004487	Nek2	NIMA (never in mitosis gene a)-related kinase 2-like 1 [Source:RGD Symbol;Acc:1582899]	1.56838	1.81988	3.87627	0.970926	0.827985	1.08667	2.51752	1.33201	up
GO:0043392	negative regulation of DNA binding	biological_process	7	0.000396562	ENSRNOG00000010603	Gzma	granzyme A [Source:RGD Symbol;Acc:628640]	8.31047	7.27624	8.60605	18.3746	12.8989	25.6912	0.424698	-1.23549	down
GO:0043392	negative regulation of DNA binding	biological_process	7	0.000396562	ENSRNOG00000014117	Hmox1	heme oxygenase 1 [Source:RGD Symbol;Acc:2806]	31.9406	70.2869	56.3487	14.3785	22.3463	16.8387	2.96053	1.56586	up
GO:0050863	regulation of T cell activation	biological_process	8	0.00048613	ENSRNOG00000010906	Ccl5	C-C motif chemokine ligand 5 [Source:RGD Symbol;Acc:69069]	48.3284	41.7605	33.5398	89.039	63.5136	135.101	0.429784	-1.21832	down
GO:0050863	regulation of T cell activation	biological_process	8	0.00048613	ENSRNOG00000021546	Sit1	signaling threshold regulating transmembrane adaptor 1 [Source:RGD Symbol;Acc:1559919]	1.07776	0.720659	1.29333	2.51028	1.88185	3.02458	0.416862	-1.26236	down
GO:0050863	regulation of T cell activation	biological_process	8	0.00048613	ENSRNOG00000036711	Spn	sialophorin [Source:RGD Symbol;Acc:3750]	6.88598	6.45845	6.84351	11.3828	12.0279	22.4867	0.439849	-1.18492	down
GO:0006954	inflammatory response	biological_process	6	0.000513232	ENSRNOG00000006639	Scn9a	sodium voltage-gated channel alpha subunit 9 [Source:RGD Symbol;Acc:69368]	0.00415055	0.00708024	0.083853	0	0	0	316.946	8.30809	up
GO:0006954	inflammatory response	biological_process	6	0.000513232	ENSRNOG00000010906	Ccl5	C-C motif chemokine ligand 5 [Source:RGD Symbol;Acc:69069]	48.3284	41.7605	33.5398	89.039	63.5136	135.101	0.429784	-1.21832	down
GO:0006954	inflammatory response	biological_process	6	0.000513232	ENSRNOG00000011557	S100a8	S100 calcium binding protein A8 [Source:RGD Symbol;Acc:620265]	6.86219	14.8878	7.83776	25.2298	19.4616	46.9158	0.322986	-1.63046	down
GO:0006954	inflammatory response	biological_process	6	0.000513232	ENSRNOG00000016804	Il25	interleukin 25 [Source:RGD Symbol;Acc:1561632]	0.051869	0.094698	0.050163	0.853721	0.318759	0.438559	0.122114	-3.0337	down
GO:0006954	inflammatory response	biological_process	6	0.000513232	ENSRNOG00000022067	Tlr5	toll-like receptor 5 [Source:RGD Symbol;Acc:631351]	3.79088	2.48157	3.94515	1.49858	1.60221	1.77419	2.09592	1.06759	up
GO:0006954	inflammatory response	biological_process	6	0.000513232	ENSRNOG00000028548	Ccl9	chemokine (C-C motif) ligand 9 [Source:RGD Symbol;Acc:1310563]	31.354	22.2453	32.1143	12.7972	13.0843	8.17364	2.5169	1.33165	up
GO:0006954	inflammatory response	biological_process	6	0.000513232	ENSRNOG00000031162	Ccl24	C-C motif chemokine ligand 24 [Source:RGD Symbol;Acc:1310245]	2.95267	4.5172	2.6358	1.47836	0.899061	1.85835	2.38579	1.25447	up
GO:0006954	inflammatory response	biological_process	6	0.000513232	ENSRNOG00000033234	Ccrl2	C-C motif chemokine receptor like 2 [Source:RGD Symbol;Acc:1311811]	7.3731	6.65768	5.30731	12.9877	11.6706	14.5202	0.493589	-1.01862	down
GO:0006954	inflammatory response	biological_process	6	0.000513232	ENSRNOG00000034290	Ccl21	C-C motif chemokine ligand 21 [Source:RGD Symbol;Acc:1311996]	71.933	100.476	149.957	63.5991	39.5568	57.0998	2.01157	1.00832	up
GO:0006954	inflammatory response	biological_process	6	0.000513232	ENSRNOG00000043451	Spp1	secreted phosphoprotein 1 [Source:RGD Symbol;Acc:3752]	5.06055	8.53045	47.2968	2.53233	1.09522	0.50064	14.7493	3.88257	up
GO:0006954	inflammatory response	biological_process	6	0.000513232	ENSRNOG00000053272	Chi3l1	chitinase 3 like 1 [Source:RGD Symbol;Acc:620874]	78.1203	93.0092	101.602	41.6996	35.3419	56.541	2.04167	1.02975	up
GO:0060325	face morphogenesis	biological_process	5	0.000545098	ENSRNOG00000003897	Col1a1	collagen type I alpha 1 chain [Source:RGD Symbol;Acc:61817]	126.27	249.911	273.591	58.1167	63.4283	51.677	3.75109	1.90731	up
GO:0060325	face morphogenesis	biological_process	5	0.000545098	ENSRNOG00000008826	Pax9	paired box 9 [Source:RGD Symbol;Acc:1560838]	0	0	1.38816	0	0	0	4627.2	12.1759	up
GO:0060325	face morphogenesis	biological_process	5	0.000545098	ENSRNOG00000010905	Dlx5	distal-less homeobox 5 [Source:RGD Symbol;Acc:2506]	0.333893	0.067122	0.257194	0	0	0	2194.03	11.0994	up
GO:0060325	face morphogenesis	biological_process	5	0.000545098	ENSRNOG00000023683	Nog	noggin [Source:RGD Symbol;Acc:3183]	1.3224	2.21724	1.19676	0.464518	0.534484	0.368221	3.46425	1.79254	up
GO:0007601	visual perception	biological_process	8	0.000637014	ENSRNOG00000003897	Col1a1	collagen type I alpha 1 chain [Source:RGD Symbol;Acc:61817]	126.27	249.911	273.591	58.1167	63.4283	51.677	3.75109	1.90731	up
GO:0007601	visual perception	biological_process	8	0.000637014	ENSRNOG00000004610	Lum	lumican [Source:RGD Symbol;Acc:620984]	6.91226	8.37983	35.9543	5.95545	5.12494	5.60998	3.07042	1.61843	up
GO:0007601	visual perception	biological_process	8	0.000637014	ENSRNOG00000005268	Gnat3	G protein subunit alpha transducin 3 [Source:RGD Symbol;Acc:727817]	1.25921	0.481596	0.306878	3.70113	2.49755	4.15072	0.197855	-2.33748	down
GO:0007601	visual perception	biological_process	8	0.000637014	ENSRNOG00000008847	Gja3	gap junction protein, alpha 3 [Source:RGD Symbol;Acc:621820]	0.349941	1.33511	0.943374	0.245536	0.233594	0.190604	3.92459	1.97254	up
GO:0007601	visual perception	biological_process	8	0.000637014	ENSRNOG00000013641	Myo7a	myosin VIIA [Source:RGD Symbol;Acc:628830]	1.16161	0.900417	1.40572	0.61878	0.548688	0.42358	2.17954	1.12402	up
GO:0007601	visual perception	biological_process	8	0.000637014	ENSRNOG00000019296	Gnat2	G protein subunit alpha transducin 2 [Source:RGD Symbol;Acc:1309514]	1.54464	1.73817	1.48	3.37445	2.70398	3.67333	0.488405	-1.03385	down
GO:0007601	visual perception	biological_process	8	0.000637014	ENSRNOG00000023148	Col11a1	collagen type XI alpha 1 chain [Source:RGD Symbol;Acc:2372]	0.411087	0.52551	0.885577	0.224042	0.278554	0.247892	2.42799	1.27976	up
GO:0071294	cellular response to zinc ion	biological_process	8	0.00064109	ENSRNOG00000025764	AC128848		30.5978	27.9313	24.8656	8.8741	12.1067	11.3119	2.58246	1.36875	up
GO:0071294	cellular response to zinc ion	biological_process	8	0.00064109	ENSRNOG00000038047	Mt1	metallothionein 1 [Source:RGD Symbol;Acc:3117]	6.48477	4.81513	5.14986	2.71678	1.77605	2.19561	2.45943	1.29833	up
GO:0071294	cellular response to zinc ion	biological_process	8	0.00064109	ENSRNOG00000043098	Mt2A	metallothionein 2A [Source:RGD Symbol;Acc:1592345]	22.5488	25.925	34.0743	11.7397	14.0395	14.0706	2.07148	1.05066	up
GO:0008237	metallopeptidase activity	molecular_function	7	0.000647212	ENSRNOG00000001715	Ece2	endothelin-converting enzyme 2 [Source:RGD Symbol;Acc:1303039]	1.446	2.21214	2.62232	0.919415	0.708033	1.19424	2.22578	1.15431	up
GO:0008237	metallopeptidase activity	molecular_function	7	0.000647212	ENSRNOG00000003538	Adamts4	ADAM metallopeptidase with thrombospondin type 1 motif, 4 [Source:RGD Symbol;Acc:621242]	0.333219	0.394028	0.42186	0.12392	0.086845	0.17875	2.9501	1.56076	up
GO:0008237	metallopeptidase activity	molecular_function	7	0.000647212	ENSRNOG00000009907	Mmp8	matrix metallopeptidase 8 [Source:RGD Symbol;Acc:631408]	1.2795	0.827246	0.892774	2.57064	1.58073	4.86069	0.332834	-1.58712	down
GO:0008237	metallopeptidase activity	molecular_function	7	0.000647212	ENSRNOG00000010935	Cpb2	carboxypeptidase B2 [Source:RGD Symbol;Acc:71035]	0.417813	0.940398	0.194739	0	0	0	5176.5	12.3378	up
GO:0008237	metallopeptidase activity	molecular_function	7	0.000647212	ENSRNOG00000017477	Mmp23	matrix metallopeptidase 23 [Source:RGD Symbol;Acc:620201]	7.15585	8.3661	9.35647	2.48982	2.59284	4.01865	2.7335	1.45075	up
GO:0008237	metallopeptidase activity	molecular_function	7	0.000647212	ENSRNOG00000030187	Mmp12	matrix metallopeptidase 12 [Source:RGD Symbol;Acc:620195]	0.8267	3.66773	18.8195	0.329763	0.456892	0.690975	15.7779	3.97983	up
GO:0008237	metallopeptidase activity	molecular_function	7	0.000647212	ENSRNOG00000051854	Enpep	glutamyl aminopeptidase [Source:RGD Symbol;Acc:621228]	18.815	14.6776	10.9005	33.2081	30.5951	30.1322	0.472593	-1.08133	down
GO:0008237	metallopeptidase activity	molecular_function	7	0.000647212	ENSRNOG00000061484	Adamts2	ADAM metallopeptidase with thrombospondin type 1 motif, 2 [Source:RGD Symbol;Acc:1565950]	25.0103	33.9663	18.8295	11.0781	12.1949	11.6513	2.22785	1.15565	up
GO:0035662	Toll-like receptor 4 binding	molecular_function	7	0.00064987	ENSRNOG00000011483	S100a9	S100 calcium binding protein A9 [Source:RGD Symbol;Acc:620267]	20.221	25.7548	22.6237	43.4388	35.8205	91.6187	0.401453	-1.3167	down
GO:0035662	Toll-like receptor 4 binding	molecular_function	7	0.00064987	ENSRNOG00000011557	S100a8	S100 calcium binding protein A8 [Source:RGD Symbol;Acc:620265]	6.86219	14.8878	7.83776	25.2298	19.4616	46.9158	0.322986	-1.63046	down
GO:0035673	oligopeptide transmembrane transporter activity	molecular_function	7	0.00064987	ENSRNOG00000002305	Slc15a2	solute carrier family 15 member 2 [Source:RGD Symbol;Acc:61972]	6.53357	3.24723	3.62347	12.5401	8.54652	8.59094	0.451663	-1.14668	down
GO:0035673	oligopeptide transmembrane transporter activity	molecular_function	7	0.00064987	ENSRNOG00000011598	Slc15a1	solute carrier family 15 member 1 [Source:RGD Symbol;Acc:621736]	0.061492	0.060826	0.078949	0	0	0	670.89	9.38993	up
GO:0062023	collagen-containing extracellular matrix	cellular_component	5	0.000676964	ENSRNOG00000001469	Eln	elastin [Source:RGD Symbol;Acc:67394]	1211.58	1294.86	280.806	159.291	311.13	177.739	4.30024	2.10442	up
GO:0062023	collagen-containing extracellular matrix	cellular_component	5	0.000676964	ENSRNOG00000004610	Lum	lumican [Source:RGD Symbol;Acc:620984]	6.91226	8.37983	35.9543	5.95545	5.12494	5.60998	3.07042	1.61843	up
GO:0062023	collagen-containing extracellular matrix	cellular_component	5	0.000676964	ENSRNOG00000010529	Thbs2	thrombospondin 2 [Source:RGD Symbol;Acc:1310979]	2.57939	6.01878	6.82916	1.12399	1.12034	1.18604	4.49727	2.16905	up
GO:0062023	collagen-containing extracellular matrix	cellular_component	5	0.000676964	ENSRNOG00000015461	Serpine2	serpin family E member 2 [Source:RGD Symbol;Acc:3748]	21.8704	32.5856	37.2124	17.0684	13.4899	15.117	2.00695	1.00501	up
GO:0062023	collagen-containing extracellular matrix	cellular_component	5	0.000676964	ENSRNOG00000017783	Sfrp1	secreted frizzled-related protein 1 [Source:RGD Symbol;Acc:621074]	1.68002	2.38548	4.44256	1.64961	1.21244	0.920778	2.24913	1.16937	up
GO:0062023	collagen-containing extracellular matrix	cellular_component	5	0.000676964	ENSRNOG00000023148	Col11a1	collagen type XI alpha 1 chain [Source:RGD Symbol;Acc:2372]	0.411087	0.52551	0.885577	0.224042	0.278554	0.247892	2.42799	1.27976	up
GO:0062023	collagen-containing extracellular matrix	cellular_component	5	0.000676964	ENSRNOG00000061484	Adamts2	ADAM metallopeptidase with thrombospondin type 1 motif, 2 [Source:RGD Symbol;Acc:1565950]	25.0103	33.9663	18.8295	11.0781	12.1949	11.6513	2.22785	1.15565	up
GO:0048245	eosinophil chemotaxis	biological_process	7	0.000824315	ENSRNOG00000010906	Ccl5	C-C motif chemokine ligand 5 [Source:RGD Symbol;Acc:69069]	48.3284	41.7605	33.5398	89.039	63.5136	135.101	0.429784	-1.21832	down
GO:0048245	eosinophil chemotaxis	biological_process	7	0.000824315	ENSRNOG00000028548	Ccl9	chemokine (C-C motif) ligand 9 [Source:RGD Symbol;Acc:1310563]	31.354	22.2453	32.1143	12.7972	13.0843	8.17364	2.5169	1.33165	up
GO:0048245	eosinophil chemotaxis	biological_process	7	0.000824315	ENSRNOG00000031162	Ccl24	C-C motif chemokine ligand 24 [Source:RGD Symbol;Acc:1310245]	2.95267	4.5172	2.6358	1.47836	0.899061	1.85835	2.38579	1.25447	up
GO:0045071	negative regulation of viral genome replication	biological_process	10	0.000836318	ENSRNOG00000001963	Mx2	MX dynamin like GTPase 2 [Source:RGD Symbol;Acc:628821]	30.1994	23.4836	17.5537	60.3679	35.706	65.2539	0.441565	-1.1793	down
GO:0045071	negative regulation of viral genome replication	biological_process	10	0.000836318	ENSRNOG00000007539	Rsad2	radical S-adenosyl methionine domain containing 2 [Source:RGD Symbol;Acc:620495]	4.92785	5.735	5.77652	12.456	7.58066	14.5645	0.475111	-1.07366	down
GO:0045071	negative regulation of viral genome replication	biological_process	10	0.000836318	ENSRNOG00000010906	Ccl5	C-C motif chemokine ligand 5 [Source:RGD Symbol;Acc:69069]	48.3284	41.7605	33.5398	89.039	63.5136	135.101	0.429784	-1.21832	down
GO:0045071	negative regulation of viral genome replication	biological_process	10	0.000836318	ENSRNOG00000033220	Oas1f	2 ' -5 ' oligoadenylate synthetase 1K [Source:RGD Symbol;Acc:1359279]	5.23307	3.89105	3.42366	9.0953	7.36568	11.0517	0.456073	-1.13266	down
GO:0044344	cellular response to fibroblast growth factor stimulus	biological_process	8	0.000836318	ENSRNOG00000003897	Col1a1	collagen type I alpha 1 chain [Source:RGD Symbol;Acc:61817]	126.27	249.911	273.591	58.1167	63.4283	51.677	3.75109	1.90731	up
GO:0044344	cellular response to fibroblast growth factor stimulus	biological_process	8	0.000836318	ENSRNOG00000010906	Ccl5	C-C motif chemokine ligand 5 [Source:RGD Symbol;Acc:69069]	48.3284	41.7605	33.5398	89.039	63.5136	135.101	0.429784	-1.21832	down
GO:0044344	cellular response to fibroblast growth factor stimulus	biological_process	8	0.000836318	ENSRNOG00000013704	Cps1	carbamoyl-phosphate synthase 1 [Source:RGD Symbol;Acc:2395]	0.0296366	0.0318274	0.0321218	0	0	0	311.953	8.28518	up
GO:0044344	cellular response to fibroblast growth factor stimulus	biological_process	8	0.000836318	ENSRNOG00000017783	Sfrp1	secreted frizzled-related protein 1 [Source:RGD Symbol;Acc:621074]	1.68002	2.38548	4.44256	1.64961	1.21244	0.920778	2.24913	1.16937	up
GO:0004252	serine-type endopeptidase activity	molecular_function	8	0.000880631	ENSRNOG00000009907	Mmp8	matrix metallopeptidase 8 [Source:RGD Symbol;Acc:631408]	1.2795	0.827246	0.892774	2.57064	1.58073	4.86069	0.332834	-1.58712	down
GO:0004252	serine-type endopeptidase activity	molecular_function	8	0.000880631	ENSRNOG00000010603	Gzma	granzyme A [Source:RGD Symbol;Acc:628640]	8.31047	7.27624	8.60605	18.3746	12.8989	25.6912	0.424698	-1.23549	down
GO:0004252	serine-type endopeptidase activity	molecular_function	8	0.000880631	ENSRNOG00000010661	Gzmk	granzyme K [Source:RGD Symbol;Acc:68401]	10.175	6.88223	6.29562	18.5387	15.2216	32.7479	0.351126	-1.50994	down
GO:0004252	serine-type endopeptidase activity	molecular_function	8	0.000880631	ENSRNOG00000020563	Cma1	chymase 1 [Source:RGD Symbol;Acc:2365]	1.06288	11.2426	14.4618	0.948545	1.00838	1.53025	7.6759	2.94034	up
GO:0004252	serine-type endopeptidase activity	molecular_function	8	0.000880631	ENSRNOG00000030530	Gzmm	granzyme M [Source:RGD Symbol;Acc:620022]	15.5155	10.2956	10.456	27.0434	19.0509	36.6771	0.43816	-1.19047	down
GO:0004252	serine-type endopeptidase activity	molecular_function	8	0.000880631	ENSRNOG00000045973	Gzmb	granzyme B [Source:RGD Symbol;Acc:620018]	2.25316	1.81994	1.79573	5.58483	4.29643	10.1425	0.293093	-1.77057	down
GO:0004252	serine-type endopeptidase activity	molecular_function	8	0.000880631	ENSRNOG00000046764	Tmprss11a	transmembrane serine protease 11A [Source:RGD Symbol;Acc:1596322]	0	0	9.5822	0	0	0	31940.7	14.9631	up
GO:0004252	serine-type endopeptidase activity	molecular_function	8	0.000880631	ENSRNOG00000049976	Gzmbl2	Granzyme B-like 2 [Source:RGD Symbol;Acc:2320097]	1.20768	0.713789	0.784046	3.07314	1.12515	4.83558	0.299486	-1.73944	down
GO:0004252	serine-type endopeptidase activity	molecular_function	8	0.000880631	ENSRNOG00000053494	Mcpt1l1	mast cell protease 1-like 1 [Source:RGD Symbol;Acc:2321286]	1.12638	24.7448	48.2037	0.458616	0.704795	1.42799	28.5849	4.83718	up
GO:0008236	serine-type peptidase activity	molecular_function	6	0.000917717	ENSRNOG00000010603	Gzma	granzyme A [Source:RGD Symbol;Acc:628640]	8.31047	7.27624	8.60605	18.3746	12.8989	25.6912	0.424698	-1.23549	down
GO:0008236	serine-type peptidase activity	molecular_function	6	0.000917717	ENSRNOG00000010661	Gzmk	granzyme K [Source:RGD Symbol;Acc:68401]	10.175	6.88223	6.29562	18.5387	15.2216	32.7479	0.351126	-1.50994	down
GO:0008236	serine-type peptidase activity	molecular_function	6	0.000917717	ENSRNOG00000020563	Cma1	chymase 1 [Source:RGD Symbol;Acc:2365]	1.06288	11.2426	14.4618	0.948545	1.00838	1.53025	7.6759	2.94034	up
GO:0008236	serine-type peptidase activity	molecular_function	6	0.000917717	ENSRNOG00000030530	Gzmm	granzyme M [Source:RGD Symbol;Acc:620022]	15.5155	10.2956	10.456	27.0434	19.0509	36.6771	0.43816	-1.19047	down
GO:0008236	serine-type peptidase activity	molecular_function	6	0.000917717	ENSRNOG00000045973	Gzmb	granzyme B [Source:RGD Symbol;Acc:620018]	2.25316	1.81994	1.79573	5.58483	4.29643	10.1425	0.293093	-1.77057	down
GO:0008236	serine-type peptidase activity	molecular_function	6	0.000917717	ENSRNOG00000046764	Tmprss11a	transmembrane serine protease 11A [Source:RGD Symbol;Acc:1596322]	0	0	9.5822	0	0	0	31940.7	14.9631	up
GO:0008236	serine-type peptidase activity	molecular_function	6	0.000917717	ENSRNOG00000049976	Gzmbl2	Granzyme B-like 2 [Source:RGD Symbol;Acc:2320097]	1.20768	0.713789	0.784046	3.07314	1.12515	4.83558	0.299486	-1.73944	down
GO:0008236	serine-type peptidase activity	molecular_function	6	0.000917717	ENSRNOG00000053494	Mcpt1l1	mast cell protease 1-like 1 [Source:RGD Symbol;Acc:2321286]	1.12638	24.7448	48.2037	0.458616	0.704795	1.42799	28.5849	4.83718	up
GO:0071276	cellular response to cadmium ion	biological_process	8	0.000953841	ENSRNOG00000014117	Hmox1	heme oxygenase 1 [Source:RGD Symbol;Acc:2806]	31.9406	70.2869	56.3487	14.3785	22.3463	16.8387	2.96053	1.56586	up
GO:0071276	cellular response to cadmium ion	biological_process	8	0.000953841	ENSRNOG00000025764	AC128848		30.5978	27.9313	24.8656	8.8741	12.1067	11.3119	2.58246	1.36875	up
GO:0071276	cellular response to cadmium ion	biological_process	8	0.000953841	ENSRNOG00000038047	Mt1	metallothionein 1 [Source:RGD Symbol;Acc:3117]	6.48477	4.81513	5.14986	2.71678	1.77605	2.19561	2.45943	1.29833	up
GO:0071276	cellular response to cadmium ion	biological_process	8	0.000953841	ENSRNOG00000043098	Mt2A	metallothionein 2A [Source:RGD Symbol;Acc:1592345]	22.5488	25.925	34.0743	11.7397	14.0395	14.0706	2.07148	1.05066	up
GO:0030198	extracellular matrix organization	biological_process	6	0.00113311	ENSRNOG00000001469	Eln	elastin [Source:RGD Symbol;Acc:67394]	1211.58	1294.86	280.806	159.291	311.13	177.739	4.30024	2.10442	up
GO:0030198	extracellular matrix organization	biological_process	6	0.00113311	ENSRNOG00000002640	Serpinb5	serpin family B member 5 [Source:RGD Symbol;Acc:69342]	0	0	0.922211	0	0	0	3074.04	11.5859	up
GO:0030198	extracellular matrix organization	biological_process	6	0.00113311	ENSRNOG00000003897	Col1a1	collagen type I alpha 1 chain [Source:RGD Symbol;Acc:61817]	126.27	249.911	273.591	58.1167	63.4283	51.677	3.75109	1.90731	up
GO:0030198	extracellular matrix organization	biological_process	6	0.00113311	ENSRNOG00000004275	Egfl6	EGF-like-domain, multiple 6 [Source:RGD Symbol;Acc:1563321]	82.0957	83.7678	48.7801	33.0382	31.1522	23.1532	2.45746	1.29717	up
GO:0030198	extracellular matrix organization	biological_process	6	0.00113311	ENSRNOG00000017477	Mmp23	matrix metallopeptidase 23 [Source:RGD Symbol;Acc:620201]	7.15585	8.3661	9.35647	2.48982	2.59284	4.01865	2.7335	1.45075	up
GO:0030198	extracellular matrix organization	biological_process	6	0.00113311	ENSRNOG00000023148	Col11a1	collagen type XI alpha 1 chain [Source:RGD Symbol;Acc:2372]	0.411087	0.52551	0.885577	0.224042	0.278554	0.247892	2.42799	1.27976	up
GO:0030198	extracellular matrix organization	biological_process	6	0.00113311	ENSRNOG00000039668	Col8a1	collagen type VIII alpha 1 chain [Source:RGD Symbol;Acc:1309361]	4.90835	6.5363	4.00716	2.58257	2.21751	1.4638	2.46681	1.30265	up
GO:0005518	collagen binding	molecular_function	5	0.00120339	ENSRNOG00000004610	Lum	lumican [Source:RGD Symbol;Acc:620984]	6.91226	8.37983	35.9543	5.95545	5.12494	5.60998	3.07042	1.61843	up
GO:0005518	collagen binding	molecular_function	5	0.00120339	ENSRNOG00000015410	Aspnl1	asporin-like 1 [Source:RGD Symbol;Acc:9278606]	5.47451	7.94654	9.04123	1.47136	1.33332	2.2312	4.46045	2.15719	up
GO:0005518	collagen binding	molecular_function	5	0.00120339	ENSRNOG00000021155	Ctsk	cathepsin K [Source:RGD Symbol;Acc:61810]	8.68873	18.433	39.2286	5.53409	8.14942	6.72412	3.25125	1.70099	up
GO:0005518	collagen binding	molecular_function	5	0.00120339	ENSRNOG00000030187	Mmp12	matrix metallopeptidase 12 [Source:RGD Symbol;Acc:620195]	0.8267	3.66773	18.8195	0.329763	0.456892	0.690975	15.7779	3.97983	up
GO:0005518	collagen binding	molecular_function	5	0.00120339	ENSRNOG00000050431	Aspn	asporin [Source:RGD Symbol;Acc:1549776]	4.35686	7.07341	9.51473	1.40718	1.43709	1.43879	4.8902	2.28989	up
GO:0035672	oligopeptide transmembrane transport	biological_process	10	0.00128701	ENSRNOG00000002305	Slc15a2	solute carrier family 15 member 2 [Source:RGD Symbol;Acc:61972]	6.53357	3.24723	3.62347	12.5401	8.54652	8.59094	0.451663	-1.14668	down
GO:0035672	oligopeptide transmembrane transport	biological_process	10	0.00128701	ENSRNOG00000011598	Slc15a1	solute carrier family 15 member 1 [Source:RGD Symbol;Acc:621736]	0.061492	0.060826	0.078949	0	0	0	670.89	9.38993	up
GO:0072108	positive regulation of mesenchymal to epithelial transition involved in metanephros morphogenesis	biological_process	10	0.00128701	ENSRNOG00000007002	Lif	LIF, interleukin 6 family cytokine [Source:RGD Symbol;Acc:620865]	0.880568	1.01865	1.04408	0.472627	0.322036	0.294568	2.70218	1.43413	up
GO:0072108	positive regulation of mesenchymal to epithelial transition involved in metanephros morphogenesis	biological_process	10	0.00128701	ENSRNOG00000026203	Pax8	paired box 8 [Source:RGD Symbol;Acc:620434]	0.679274	0.646556	1.36295	0.21796	0.383172	0.130189	3.6766	1.87837	up
GO:0060545	positive regulation of necroptotic process	biological_process	10	0.00128701	ENSRNOG00000045973	Gzmb	granzyme B [Source:RGD Symbol;Acc:620018]	2.25316	1.81994	1.79573	5.58483	4.29643	10.1425	0.293093	-1.77057	down
GO:0060545	positive regulation of necroptotic process	biological_process	10	0.00128701	ENSRNOG00000049976	Gzmbl2	Granzyme B-like 2 [Source:RGD Symbol;Acc:2320097]	1.20768	0.713789	0.784046	3.07314	1.12515	4.83558	0.299486	-1.73944	down
GO:0001951	intestinal D-glucose absorption	biological_process	9	0.00128701	ENSRNOG00000015408	Vil1	villin 1 [Source:RGD Symbol;Acc:1307048]	0.852	0.23051	0.408527	1.89595	1.63924	3.09661	0.224832	-2.15308	down
GO:0001951	intestinal D-glucose absorption	biological_process	9	0.00128701	ENSRNOG00000017775	Slc5a1	solute carrier family 5 member 1 [Source:RGD Symbol;Acc:3713]	5.02389	3.24643	3.5349	9.53507	10.2527	6.94576	0.441589	-1.17922	down
GO:0002175	protein localization to paranode region of axon	biological_process	7	0.00128701	ENSRNOG00000015445	Mal	mal, T-cell differentiation protein [Source:RGD Symbol;Acc:3037]	4.28993	6.10298	7.71911	8.68788	11.4303	17.2031	0.485301	-1.04305	down
GO:0002175	protein localization to paranode region of axon	biological_process	7	0.00128701	ENSRNOG00000030515	Nfasc	neurofascin [Source:RGD Symbol;Acc:620911]	0.0215103	0.0189856	0.293672	0.00693821	0.00924876	0	20.6443	4.36767	up
GO:0006919	activation of cysteine-type endopeptidase activity involved in apoptotic process	biological_process	11	0.00141905	ENSRNOG00000002978	Faslg	Fas ligand [Source:RGD Symbol;Acc:3880]	0.709471	0.473535	1.27202	2.10948	1.83509	3.11962	0.347531	-1.52479	down
GO:0006919	activation of cysteine-type endopeptidase activity involved in apoptotic process	biological_process	11	0.00141905	ENSRNOG00000007637	Acer2	alkaline ceramidase 2 [Source:RGD Symbol;Acc:1304629]	130.856	81.491	59.5416	196.926	173.911	212.56	0.466044	-1.10146	down
GO:0006919	activation of cysteine-type endopeptidase activity involved in apoptotic process	biological_process	11	0.00141905	ENSRNOG00000011483	S100a9	S100 calcium binding protein A9 [Source:RGD Symbol;Acc:620267]	20.221	25.7548	22.6237	43.4388	35.8205	91.6187	0.401453	-1.3167	down
GO:0006919	activation of cysteine-type endopeptidase activity involved in apoptotic process	biological_process	11	0.00141905	ENSRNOG00000011557	S100a8	S100 calcium binding protein A8 [Source:RGD Symbol;Acc:620265]	6.86219	14.8878	7.83776	25.2298	19.4616	46.9158	0.322986	-1.63046	down
GO:0006919	activation of cysteine-type endopeptidase activity involved in apoptotic process	biological_process	11	0.00141905	ENSRNOG00000017606	P2rx1	purinergic receptor P2X 1 [Source:RGD Symbol;Acc:3240]	7.18568	9.04786	9.01957	19.2409	13.9678	19.8251	0.476169	-1.07045	down
GO:0042472	inner ear morphogenesis	biological_process	6	0.00153696	ENSRNOG00000007765	Frzb	frizzled-related protein [Source:RGD Symbol;Acc:1311315]	3.17213	4.68488	12.4008	2.30154	1.72858	2.68979	3.01459	1.59196	up
GO:0042472	inner ear morphogenesis	biological_process	6	0.00153696	ENSRNOG00000010905	Dlx5	distal-less homeobox 5 [Source:RGD Symbol;Acc:2506]	0.333893	0.067122	0.257194	0	0	0	2194.03	11.0994	up
GO:0042472	inner ear morphogenesis	biological_process	6	0.00153696	ENSRNOG00000013641	Myo7a	myosin VIIA [Source:RGD Symbol;Acc:628830]	1.16161	0.900417	1.40572	0.61878	0.548688	0.42358	2.17954	1.12402	up
GO:0042472	inner ear morphogenesis	biological_process	6	0.00153696	ENSRNOG00000023148	Col11a1	collagen type XI alpha 1 chain [Source:RGD Symbol;Acc:2372]	0.411087	0.52551	0.885577	0.224042	0.278554	0.247892	2.42799	1.27976	up
GO:0042472	inner ear morphogenesis	biological_process	6	0.00153696	ENSRNOG00000026203	Pax8	paired box 8 [Source:RGD Symbol;Acc:620434]	0.679274	0.646556	1.36295	0.21796	0.383172	0.130189	3.6766	1.87837	up
GO:0048020	CCR chemokine receptor binding	molecular_function	8	0.00156181	ENSRNOG00000028548	Ccl9	chemokine (C-C motif) ligand 9 [Source:RGD Symbol;Acc:1310563]	31.354	22.2453	32.1143	12.7972	13.0843	8.17364	2.5169	1.33165	up
GO:0048020	CCR chemokine receptor binding	molecular_function	8	0.00156181	ENSRNOG00000031162	Ccl24	C-C motif chemokine ligand 24 [Source:RGD Symbol;Acc:1310245]	2.95267	4.5172	2.6358	1.47836	0.899061	1.85835	2.38579	1.25447	up
GO:0048020	CCR chemokine receptor binding	molecular_function	8	0.00156181	ENSRNOG00000034290	Ccl21	C-C motif chemokine ligand 21 [Source:RGD Symbol;Acc:1311996]	71.933	100.476	149.957	63.5991	39.5568	57.0998	2.01157	1.00832	up
GO:0010043	response to zinc ion	biological_process	7	0.00171976	ENSRNOG00000011557	S100a8	S100 calcium binding protein A8 [Source:RGD Symbol;Acc:620265]	6.86219	14.8878	7.83776	25.2298	19.4616	46.9158	0.322986	-1.63046	down
GO:0010043	response to zinc ion	biological_process	7	0.00171976	ENSRNOG00000013304	Arg1	arginase 1 [Source:RGD Symbol;Acc:2150]	8.35733	12.4054	14.4375	5.09255	6.15658	5.0671	2.15737	1.10928	up
GO:0010043	response to zinc ion	biological_process	7	0.00171976	ENSRNOG00000013704	Cps1	carbamoyl-phosphate synthase 1 [Source:RGD Symbol;Acc:2395]	0.0296366	0.0318274	0.0321218	0	0	0	311.953	8.28518	up
GO:0010043	response to zinc ion	biological_process	7	0.00171976	ENSRNOG00000038047	Mt1	metallothionein 1 [Source:RGD Symbol;Acc:3117]	6.48477	4.81513	5.14986	2.71678	1.77605	2.19561	2.45943	1.29833	up
GO:0042803	protein homodimerization activity	molecular_function	6	0.00186247	ENSRNOG00000003298	Cd247	Cd247 molecule [Source:RGD Symbol;Acc:2305]	3.42781	2.27339	3.39083	5.96858	4.58895	7.66207	0.499025	-1.00282	down
GO:0042803	protein homodimerization activity	molecular_function	6	0.00186247	ENSRNOG00000006426	Syt1	synaptotagmin 1 [Source:RGD Symbol;Acc:3803]	0.535581	0.254328	0.726439	1.20032	1.83951	1.33849	0.346332	-1.52977	down
GO:0042803	protein homodimerization activity	molecular_function	6	0.00186247	ENSRNOG00000007574	Padi2	peptidyl arginine deiminase 2 [Source:RGD Symbol;Acc:3288]	1.05408	0.426038	0.672806	1.90207	1.87646	2.07766	0.367632	-1.44367	down
GO:0042803	protein homodimerization activity	molecular_function	6	0.00186247	ENSRNOG00000008902	Pon1	paraoxonase 1 [Source:RGD Symbol;Acc:620062]	4.94993	3.6737	3.80655	9.75741	7.38752	8.1471	0.491466	-1.02484	down
GO:0042803	protein homodimerization activity	molecular_function	6	0.00186247	ENSRNOG00000010603	Gzma	granzyme A [Source:RGD Symbol;Acc:628640]	8.31047	7.27624	8.60605	18.3746	12.8989	25.6912	0.424698	-1.23549	down
GO:0042803	protein homodimerization activity	molecular_function	6	0.00186247	ENSRNOG00000010906	Ccl5	C-C motif chemokine ligand 5 [Source:RGD Symbol;Acc:69069]	48.3284	41.7605	33.5398	89.039	63.5136	135.101	0.429784	-1.21832	down
GO:0042803	protein homodimerization activity	molecular_function	6	0.00186247	ENSRNOG00000013481	Cdh11	cadherin 11 [Source:RGD Symbol;Acc:619742]	13.9402	23.495	20.613	7.8593	11.181	7.5212	2.18543	1.12791	up
GO:0042803	protein homodimerization activity	molecular_function	6	0.00186247	ENSRNOG00000013641	Myo7a	myosin VIIA [Source:RGD Symbol;Acc:628830]	1.16161	0.900417	1.40572	0.61878	0.548688	0.42358	2.17954	1.12402	up
GO:0042803	protein homodimerization activity	molecular_function	6	0.00186247	ENSRNOG00000013973	Lcn2	lipocalin 2 [Source:RGD Symbol;Acc:69408]	399.193	738.611	424.407	107.199	115.007	143.758	4.26876	2.09382	up
GO:0042803	protein homodimerization activity	molecular_function	6	0.00186247	ENSRNOG00000014117	Hmox1	heme oxygenase 1 [Source:RGD Symbol;Acc:2806]	31.9406	70.2869	56.3487	14.3785	22.3463	16.8387	2.96053	1.56586	up
GO:0042803	protein homodimerization activity	molecular_function	6	0.00186247	ENSRNOG00000015408	Vil1	villin 1 [Source:RGD Symbol;Acc:1307048]	0.852	0.23051	0.408527	1.89595	1.63924	3.09661	0.224832	-2.15308	down
GO:0042803	protein homodimerization activity	molecular_function	6	0.00186247	ENSRNOG00000021294	Mstn	myostatin [Source:RGD Symbol;Acc:3115]	0.059124	1.35602	0.037337	0	0	0	4841.6	12.2413	up
GO:0042803	protein homodimerization activity	molecular_function	6	0.00186247	ENSRNOG00000023683	Nog	noggin [Source:RGD Symbol;Acc:3183]	1.3224	2.21724	1.19676	0.464518	0.534484	0.368221	3.46425	1.79254	up
GO:0042803	protein homodimerization activity	molecular_function	6	0.00186247	ENSRNOG00000023993	Kif1a	kinesin family member 1A [Source:RGD Symbol;Acc:1304996]	0.166506	0.124253	0.194855	0.636146	0.353681	0.430159	0.341985	-1.54799	down
GO:0042803	protein homodimerization activity	molecular_function	6	0.00186247	ENSRNOG00000024365	Ect2	epithelial cell transforming 2 [Source:RGD Symbol;Acc:1308524]	1.29219	2.68213	3.60527	1.27175	1.0084	0.842832	2.42703	1.27919	up
GO:0042803	protein homodimerization activity	molecular_function	6	0.00186247	ENSRNOG00000029055	Ttk	Ttk protein kinase [Source:RGD Symbol;Acc:1305558]	0.567316	1.43363	1.35383	0.510706	0.373299	0.471024	2.4758	1.30789	up
GO:0042803	protein homodimerization activity	molecular_function	6	0.00186247	ENSRNOG00000031536	Syndig1	synapse differentiation inducing 1 [Source:RGD Symbol;Acc:1310753]	3.11116	2.77016	1.96867	5.58928	6.40608	5.16542	0.457438	-1.12835	down
GO:0042803	protein homodimerization activity	molecular_function	6	0.00186247	ENSRNOG00000033837	Cdh9	cadherin 9 [Source:RGD Symbol;Acc:1308343]	0	0	0	0.210953	0.147315	0.112743	0.000636928	-10.6166	down
GO:0042803	protein homodimerization activity	molecular_function	6	0.00186247	ENSRNOG00000048961	Bhlhe41	basic helix-loop-helix family, member e41 [Source:RGD Symbol;Acc:70900]	6.85014	6.52222	7.32891	3.13158	3.88331	3.13387	2.03978	1.02842	up
GO:0042803	protein homodimerization activity	molecular_function	6	0.00186247	ENSRNOG00000052498	Grb14	growth factor receptor bound protein 14 [Source:RGD Symbol;Acc:61869]	3.63754	5.12271	7.05952	3.0236	2.25713	1.48807	2.33716	1.22476	up
GO:0042803	protein homodimerization activity	molecular_function	6	0.00186247	ENSRNOG00000058714	Klre1	killer cell lectin-like receptor, family E, member 1 [Source:RGD Symbol;Acc:727903]	1.41711	1.79425	1.54913	5.00401	2.61277	6.33873	0.341119	-1.55165	down
GO:0030199	collagen fibril organization	biological_process	7	0.00191246	ENSRNOG00000003897	Col1a1	collagen type I alpha 1 chain [Source:RGD Symbol;Acc:61817]	126.27	249.911	273.591	58.1167	63.4283	51.677	3.75109	1.90731	up
GO:0030199	collagen fibril organization	biological_process	7	0.00191246	ENSRNOG00000004610	Lum	lumican [Source:RGD Symbol;Acc:620984]	6.91226	8.37983	35.9543	5.95545	5.12494	5.60998	3.07042	1.61843	up
GO:0030199	collagen fibril organization	biological_process	7	0.00191246	ENSRNOG00000023148	Col11a1	collagen type XI alpha 1 chain [Source:RGD Symbol;Acc:2372]	0.411087	0.52551	0.885577	0.224042	0.278554	0.247892	2.42799	1.27976	up
GO:0030199	collagen fibril organization	biological_process	7	0.00191246	ENSRNOG00000061484	Adamts2	ADAM metallopeptidase with thrombospondin type 1 motif, 2 [Source:RGD Symbol;Acc:1565950]	25.0103	33.9663	18.8295	11.0781	12.1949	11.6513	2.22785	1.15565	up
GO:0008009	chemokine activity	molecular_function	8	0.0021196	ENSRNOG00000010906	Ccl5	C-C motif chemokine ligand 5 [Source:RGD Symbol;Acc:69069]	48.3284	41.7605	33.5398	89.039	63.5136	135.101	0.429784	-1.21832	down
GO:0008009	chemokine activity	molecular_function	8	0.0021196	ENSRNOG00000028548	Ccl9	chemokine (C-C motif) ligand 9 [Source:RGD Symbol;Acc:1310563]	31.354	22.2453	32.1143	12.7972	13.0843	8.17364	2.5169	1.33165	up
GO:0008009	chemokine activity	molecular_function	8	0.0021196	ENSRNOG00000031162	Ccl24	C-C motif chemokine ligand 24 [Source:RGD Symbol;Acc:1310245]	2.95267	4.5172	2.6358	1.47836	0.899061	1.85835	2.38579	1.25447	up
GO:0008009	chemokine activity	molecular_function	8	0.0021196	ENSRNOG00000034290	Ccl21	C-C motif chemokine ligand 21 [Source:RGD Symbol;Acc:1311996]	71.933	100.476	149.957	63.5991	39.5568	57.0998	2.01157	1.00832	up
GO:0035425	autocrine signaling	biological_process	6	0.00212403	ENSRNOG00000011557	S100a8	S100 calcium binding protein A8 [Source:RGD Symbol;Acc:620265]	6.86219	14.8878	7.83776	25.2298	19.4616	46.9158	0.322986	-1.63046	down
GO:0035425	autocrine signaling	biological_process	6	0.00212403	ENSRNOG00000037563	Cd68	Cd68 molecule [Source:RGD Symbol;Acc:1305970]	75.5859	71.5358	91.732	32.3381	37.7388	35.3836	2.26486	1.17942	up
GO:0006857	oligopeptide transport	biological_process	9	0.00212403	ENSRNOG00000002305	Slc15a2	solute carrier family 15 member 2 [Source:RGD Symbol;Acc:61972]	6.53357	3.24723	3.62347	12.5401	8.54652	8.59094	0.451663	-1.14668	down
GO:0006857	oligopeptide transport	biological_process	9	0.00212403	ENSRNOG00000011598	Slc15a1	solute carrier family 15 member 1 [Source:RGD Symbol;Acc:621736]	0.061492	0.060826	0.078949	0	0	0	670.89	9.38993	up
GO:0060676	ureteric bud formation	biological_process	10	0.00212403	ENSRNOG00000023683	Nog	noggin [Source:RGD Symbol;Acc:3183]	1.3224	2.21724	1.19676	0.464518	0.534484	0.368221	3.46425	1.79254	up
GO:0060676	ureteric bud formation	biological_process	10	0.00212403	ENSRNOG00000026053	Grem1	gremlin 1, DAN family BMP antagonist [Source:RGD Symbol;Acc:2359]	0.95987	2.57523	2.25854	0.284014	0.14634	0.159551	9.82132	3.29592	up
GO:0060205	cytoplasmic vesicle lumen	cellular_component	6	0.00212403	ENSRNOG00000002978	Faslg	Fas ligand [Source:RGD Symbol;Acc:3880]	0.709471	0.473535	1.27202	2.10948	1.83509	3.11962	0.347531	-1.52479	down
GO:0060205	cytoplasmic vesicle lumen	cellular_component	6	0.00212403	ENSRNOG00000013973	Lcn2	lipocalin 2 [Source:RGD Symbol;Acc:69408]	399.193	738.611	424.407	107.199	115.007	143.758	4.26876	2.09382	up
GO:0001730	2'-5'-oligoadenylate synthetase activity	molecular_function	8	0.00212403	ENSRNOG00000033220	Oas1f	2 ' -5 ' oligoadenylate synthetase 1K [Source:RGD Symbol;Acc:1359279]	5.23307	3.89105	3.42366	9.0953	7.36568	11.0517	0.456073	-1.13266	down
GO:0001730	2'-5'-oligoadenylate synthetase activity	molecular_function	8	0.00212403	ENSRNOG00000049282	Oas2	2'-5' oligoadenylate synthetase 2 [Source:RGD Symbol;Acc:1359697]	5.96024	3.32075	3.13407	12.3504	5.63243	14.1955	0.385821	-1.374	down
GO:0005543	phospholipid binding	molecular_function	5	0.0022046	ENSRNOG00000006426	Syt1	synaptotagmin 1 [Source:RGD Symbol;Acc:3803]	0.535581	0.254328	0.726439	1.20032	1.83951	1.33849	0.346332	-1.52977	down
GO:0005543	phospholipid binding	molecular_function	5	0.0022046	ENSRNOG00000008902	Pon1	paraoxonase 1 [Source:RGD Symbol;Acc:620062]	4.94993	3.6737	3.80655	9.75741	7.38752	8.1471	0.491466	-1.02484	down
GO:0005543	phospholipid binding	molecular_function	5	0.0022046	ENSRNOG00000013578	Trem2	triggering receptor expressed on myeloid cells 2 [Source:RGD Symbol;Acc:1309841]	7.38714	14.2293	26.9458	3.19457	3.44342	4.12088	4.51369	2.17431	up
GO:0005543	phospholipid binding	molecular_function	5	0.0022046	ENSRNOG00000013704	Cps1	carbamoyl-phosphate synthase 1 [Source:RGD Symbol;Acc:2395]	0.0296366	0.0318274	0.0321218	0	0	0	311.953	8.28518	up
GO:0005543	phospholipid binding	molecular_function	5	0.0022046	ENSRNOG00000016945	Pla2g2a	phospholipase A2 group IIA [Source:RGD Symbol;Acc:620857]	31.8882	19.843	49.1573	12.1527	19.2349	10.06	2.43412	1.2834	up
GO:0005543	phospholipid binding	molecular_function	5	0.0022046	ENSRNOG00000023861	Snap91	synaptosome associated protein 91 [Source:RGD Symbol;Acc:69276]	0.600716	1.31582	1.89791	0.212098	0.244769	0.32715	4.86526	2.28252	up
GO:0071280	cellular response to copper ion	biological_process	8	0.0022265	ENSRNOG00000025764	AC128848		30.5978	27.9313	24.8656	8.8741	12.1067	11.3119	2.58246	1.36875	up
GO:0071280	cellular response to copper ion	biological_process	8	0.0022265	ENSRNOG00000038047	Mt1	metallothionein 1 [Source:RGD Symbol;Acc:3117]	6.48477	4.81513	5.14986	2.71678	1.77605	2.19561	2.45943	1.29833	up
GO:0071280	cellular response to copper ion	biological_process	8	0.0022265	ENSRNOG00000043098	Mt2A	metallothionein 2A [Source:RGD Symbol;Acc:1592345]	22.5488	25.925	34.0743	11.7397	14.0395	14.0706	2.07148	1.05066	up
GO:0071560	cellular response to transforming growth factor beta stimulus	biological_process	8	0.00223723	ENSRNOG00000003897	Col1a1	collagen type I alpha 1 chain [Source:RGD Symbol;Acc:61817]	126.27	249.911	273.591	58.1167	63.4283	51.677	3.75109	1.90731	up
GO:0071560	cellular response to transforming growth factor beta stimulus	biological_process	8	0.00223723	ENSRNOG00000013304	Arg1	arginase 1 [Source:RGD Symbol;Acc:2150]	8.35733	12.4054	14.4375	5.09255	6.15658	5.0671	2.15737	1.10928	up
GO:0071560	cellular response to transforming growth factor beta stimulus	biological_process	8	0.00223723	ENSRNOG00000014170	Dbn1	drebrin 1 [Source:RGD Symbol;Acc:70885]	10.9214	12.9572	10.2577	6.1132	4.51819	6.14413	2.03489	1.02495	up
GO:0071560	cellular response to transforming growth factor beta stimulus	biological_process	8	0.00223723	ENSRNOG00000017783	Sfrp1	secreted frizzled-related protein 1 [Source:RGD Symbol;Acc:621074]	1.68002	2.38548	4.44256	1.64961	1.21244	0.920778	2.24913	1.16937	up
GO:0071560	cellular response to transforming growth factor beta stimulus	biological_process	8	0.00223723	ENSRNOG00000018598	Ankrd1	ankyrin repeat domain 1 [Source:RGD Symbol;Acc:61989]	52.1948	92.124	57.3024	26.6198	31.8094	17.7761	2.64577	1.40369	up
GO:0001664	G protein-coupled receptor binding	molecular_function	6	0.0024012	ENSRNOG00000005268	Gnat3	G protein subunit alpha transducin 3 [Source:RGD Symbol;Acc:727817]	1.25921	0.481596	0.306878	3.70113	2.49755	4.15072	0.197855	-2.33748	down
GO:0001664	G protein-coupled receptor binding	molecular_function	6	0.0024012	ENSRNOG00000009342	Fcnb	ficolin B [Source:RGD Symbol;Acc:621222]	6.86838	5.02796	3.18654	12.0512	8.59387	23.5555	0.341237	-1.55115	down
GO:0001664	G protein-coupled receptor binding	molecular_function	6	0.0024012	ENSRNOG00000017873	Sct	secretin [Source:RGD Symbol;Acc:3643]	1.23791	1.93048	2.4561	0.102153	0.550348	0.362674	5.54041	2.46999	up
GO:0001664	G protein-coupled receptor binding	molecular_function	6	0.0024012	ENSRNOG00000019296	Gnat2	G protein subunit alpha transducin 2 [Source:RGD Symbol;Acc:1309514]	1.54464	1.73817	1.48	3.37445	2.70398	3.67333	0.488405	-1.03385	down
GO:0001664	G protein-coupled receptor binding	molecular_function	6	0.0024012	ENSRNOG00000036685	Npb	neuropeptide B [Source:RGD Symbol;Acc:708513]	4.7747	3.3954	4.53054	0.833322	1.38046	0.961871	3.99938	1.99978	up
GO:0055085	transmembrane transport	biological_process	6	0.00245411	ENSRNOG00000000562	Prf1	perforin 1 [Source:RGD Symbol;Acc:708463]	11.7317	8.28855	6.91728	21.9426	12.0857	30.3654	0.418325	-1.2573	down
GO:0055085	transmembrane transport	biological_process	6	0.00245411	ENSRNOG00000002305	Slc15a2	solute carrier family 15 member 2 [Source:RGD Symbol;Acc:61972]	6.53357	3.24723	3.62347	12.5401	8.54652	8.59094	0.451663	-1.14668	down
GO:0055085	transmembrane transport	biological_process	6	0.00245411	ENSRNOG00000006639	Scn9a	sodium voltage-gated channel alpha subunit 9 [Source:RGD Symbol;Acc:69368]	0.00415055	0.00708024	0.083853	0	0	0	316.946	8.30809	up
GO:0055085	transmembrane transport	biological_process	6	0.00245411	ENSRNOG00000008847	Gja3	gap junction protein, alpha 3 [Source:RGD Symbol;Acc:621820]	0.349941	1.33511	0.943374	0.245536	0.233594	0.190604	3.92459	1.97254	up
GO:0055085	transmembrane transport	biological_process	6	0.00245411	ENSRNOG00000010938	Slc7a10	solute carrier family 7 member 10 [Source:RGD Symbol;Acc:621672]	5.14524	4.07878	5.28848	21.1096	13.4018	15.739	0.288803	-1.79184	down
GO:0055085	transmembrane transport	biological_process	6	0.00245411	ENSRNOG00000011598	Slc15a1	solute carrier family 15 member 1 [Source:RGD Symbol;Acc:621736]	0.061492	0.060826	0.078949	0	0	0	670.89	9.38993	up
GO:0055085	transmembrane transport	biological_process	6	0.00245411	ENSRNOG00000015410	Aspnl1	asporin-like 1 [Source:RGD Symbol;Acc:9278606]	5.47451	7.94654	9.04123	1.47136	1.33332	2.2312	4.46045	2.15719	up
GO:0055085	transmembrane transport	biological_process	6	0.00245411	ENSRNOG00000017060	Ryr2	ryanodine receptor 2 [Source:RGD Symbol;Acc:620314]	0.285075	0.300051	1.47817	0.173643	0.049516	0.188027	5.01792	2.32709	up
GO:0055085	transmembrane transport	biological_process	6	0.00245411	ENSRNOG00000017775	Slc5a1	solute carrier family 5 member 1 [Source:RGD Symbol;Acc:3713]	5.02389	3.24643	3.5349	9.53507	10.2527	6.94576	0.441589	-1.17922	down
GO:0055085	transmembrane transport	biological_process	6	0.00245411	ENSRNOG00000020484	Trpm5	transient receptor potential cation channel, subfamily M, member 5 [Source:RGD Symbol;Acc:1310620]	7.2614	1.93473	3.55776	17.4263	11.9153	18.1559	0.268517	-1.89691	down
GO:0055085	transmembrane transport	biological_process	6	0.00245411	ENSRNOG00000024903	Slc7a13	solute carrier family 7 member 13 [Source:RGD Symbol;Acc:1311633]	0.127032	0.106233	0.124536	1.28615	0.650971	0.667867	0.137352	-2.86405	down
GO:0055085	transmembrane transport	biological_process	6	0.00245411	ENSRNOG00000030537	Slc26a11	solute carrier family 26 member 11 [Source:RGD Symbol;Acc:1306178]	6.84628	6.70089	8.1726	4.02064	3.4052	3.16109	2.05157	1.03673	up
GO:0055085	transmembrane transport	biological_process	6	0.00245411	ENSRNOG00000031249	Slco1a2	solute carrier organic anion transporter family, member 1A2 [Source:RGD Symbol;Acc:70985]	8.01298	7.7205	7.23905	17.1036	14.73	19.8891	0.444148	-1.17089	down
GO:0055085	transmembrane transport	biological_process	6	0.00245411	ENSRNOG00000036984	Slco1a1	solute carrier organic anion transporter family, member 1a1 [Source:RGD Symbol;Acc:3700]	0.317929	0.628859	0.396718	0.058162	0.110115	0.019966	7.13708	2.83533	up
GO:0055085	transmembrane transport	biological_process	6	0.00245411	ENSRNOG00000039390	Slc37a2	solute carrier family 37 member 2 [Source:RGD Symbol;Acc:1564160]	1.97428	2.51988	3.94794	1.16326	1.15279	1.37104	2.28964	1.19512	up
GO:0055085	transmembrane transport	biological_process	6	0.00245411	ENSRNOG00000050431	Aspn	asporin [Source:RGD Symbol;Acc:1549776]	4.35686	7.07341	9.51473	1.40718	1.43709	1.43879	4.8902	2.28989	up
GO:0055085	transmembrane transport	biological_process	6	0.00245411	ENSRNOG00000058692	Slc26a4	solute carrier family 26 member 4 [Source:RGD Symbol;Acc:3293]	4.03381	8.98354	10.6969	1.03707	0.715431	0.934049	8.82701	3.14192	up
GO:0016021	integral component of membrane	cellular_component	5	0.00258013	ENSRNOG00000000562	Prf1	perforin 1 [Source:RGD Symbol;Acc:708463]	11.7317	8.28855	6.91728	21.9426	12.0857	30.3654	0.418325	-1.2573	down
GO:0016021	integral component of membrane	cellular_component	5	0.00258013	ENSRNOG00000000963	Tmem132c	transmembrane protein 132C [Source:RGD Symbol;Acc:1583824]	7.35327	11.1387	7.12739	3.69575	4.4461	4.23731	2.06956	1.04932	up
GO:0016021	integral component of membrane	cellular_component	5	0.00258013	ENSRNOG00000001715	Ece2	endothelin-converting enzyme 2 [Source:RGD Symbol;Acc:1303039]	1.446	2.21214	2.62232	0.919415	0.708033	1.19424	2.22578	1.15431	up
GO:0016021	integral component of membrane	cellular_component	5	0.00258013	ENSRNOG00000002174	Cwh43	cell wall biogenesis 43 C-terminal homolog [Source:RGD Symbol;Acc:1310958]	0.1874	0.107866	0.219896	0.558149	0.417464	0.815701	0.287589	-1.79792	down
GO:0016021	integral component of membrane	cellular_component	5	0.00258013	ENSRNOG00000002305	Slc15a2	solute carrier family 15 member 2 [Source:RGD Symbol;Acc:61972]	6.53357	3.24723	3.62347	12.5401	8.54652	8.59094	0.451663	-1.14668	down
GO:0016021	integral component of membrane	cellular_component	5	0.00258013	ENSRNOG00000002978	Faslg	Fas ligand [Source:RGD Symbol;Acc:3880]	0.709471	0.473535	1.27202	2.10948	1.83509	3.11962	0.347531	-1.52479	down
GO:0016021	integral component of membrane	cellular_component	5	0.00258013	ENSRNOG00000003298	Cd247	Cd247 molecule [Source:RGD Symbol;Acc:2305]	3.42781	2.27339	3.39083	5.96858	4.58895	7.66207	0.499025	-1.00282	down
GO:0016021	integral component of membrane	cellular_component	5	0.00258013	ENSRNOG00000004757	Tmem158	transmembrane protein 158 [Source:RGD Symbol;Acc:708473]	5.30168	5.05016	6.09187	1.49572	2.71212	1.95615	2.6677	1.4156	up
GO:0016021	integral component of membrane	cellular_component	5	0.00258013	ENSRNOG00000004932	Sel1l3	SEL1L family member 3 [Source:RGD Symbol;Acc:1562860]	4.72609	4.52532	8.25234	3.0401	1.99739	1.63522	2.62319	1.39132	up
GO:0016021	integral component of membrane	cellular_component	5	0.00258013	ENSRNOG00000005277	Ptprv	protein tyrosine phosphatase, receptor type, V [Source:RGD Symbol;Acc:621123]	0.136187	0.466404	1.01071	0.106009	0.072467	0.13226	5.19186	2.37625	up
GO:0016021	integral component of membrane	cellular_component	5	0.00258013	ENSRNOG00000006093	LRRTM1	leucine rich repeat transmembrane neuronal 1 [Source:RGD Symbol;Acc:1585921]	0.125443	0.154939	0.134368	0	0.01746	0	23.7543	4.57012	up
GO:0016021	integral component of membrane	cellular_component	5	0.00258013	ENSRNOG00000006426	Syt1	synaptotagmin 1 [Source:RGD Symbol;Acc:3803]	0.535581	0.254328	0.726439	1.20032	1.83951	1.33849	0.346332	-1.52977	down
GO:0016021	integral component of membrane	cellular_component	5	0.00258013	ENSRNOG00000006639	Scn9a	sodium voltage-gated channel alpha subunit 9 [Source:RGD Symbol;Acc:69368]	0.00415055	0.00708024	0.083853	0	0	0	316.946	8.30809	up
GO:0016021	integral component of membrane	cellular_component	5	0.00258013	ENSRNOG00000007455	Tmem132e	transmembrane protein 132E [Source:RGD Symbol;Acc:1565522]	0.218614	0.206996	0.460095	0.0125169	0.0114254	0.0510493	11.8107	3.56203	up
GO:0016021	integral component of membrane	cellular_component	5	0.00258013	ENSRNOG00000007509	Slc1a6	solute carrier family 1 member 6 [Source:RGD Symbol;Acc:620340]	0.044448	0.022178	1.5478	0	0	0	5381.42	12.3938	up
GO:0016021	integral component of membrane	cellular_component	5	0.00258013	ENSRNOG00000007637	Acer2	alkaline ceramidase 2 [Source:RGD Symbol;Acc:1304629]	130.856	81.491	59.5416	196.926	173.911	212.56	0.466044	-1.10146	down
GO:0016021	integral component of membrane	cellular_component	5	0.00258013	ENSRNOG00000008816	Gpnmb	glycoprotein nmb [Source:RGD Symbol;Acc:71008]	193.456	246.629	303.418	84.0387	88.9556	65.1415	3.12218	1.64255	up
GO:0016021	integral component of membrane	cellular_component	5	0.00258013	ENSRNOG00000008847	Gja3	gap junction protein, alpha 3 [Source:RGD Symbol;Acc:621820]	0.349941	1.33511	0.943374	0.245536	0.233594	0.190604	3.92459	1.97254	up
GO:0016021	integral component of membrane	cellular_component	5	0.00258013	ENSRNOG00000009711	Hepacam2	HEPACAM family member 2 [Source:RGD Symbol;Acc:1305697]	2.38517	0.594502	1.80485	5.35148	4.28483	6.75194	0.291948	-1.77622	down
GO:0016021	integral component of membrane	cellular_component	5	0.00258013	ENSRNOG00000010268	Vom2r44	vomeronasal 2 receptor 44 [Source:RGD Symbol;Acc:708515]	0.097324	0.555759	0.388232	0.070268	0.102233	0.085323	4.03886	2.01395	up
GO:0016021	integral component of membrane	cellular_component	5	0.00258013	ENSRNOG00000010938	Slc7a10	solute carrier family 7 member 10 [Source:RGD Symbol;Acc:621672]	5.14524	4.07878	5.28848	21.1096	13.4018	15.739	0.288803	-1.79184	down
GO:0016021	integral component of membrane	cellular_component	5	0.00258013	ENSRNOG00000011132	LOC100362814	hypothetical protein LOC100362814 [Source:RGD Symbol;Acc:2323964]	2.40135	2.06489	1.89125	0.660238	1.07572	0.442748	2.91801	1.54499	up
GO:0016021	integral component of membrane	cellular_component	5	0.00258013	ENSRNOG00000011598	Slc15a1	solute carrier family 15 member 1 [Source:RGD Symbol;Acc:621736]	0.061492	0.060826	0.078949	0	0	0	670.89	9.38993	up
GO:0016021	integral component of membrane	cellular_component	5	0.00258013	ENSRNOG00000011858	Unc5d	unc-5 netrin receptor D [Source:RGD Symbol;Acc:1309245]	0	0.0165455	0	0.397214	0.0649044	0.0837426	0.0303107	-5.04403	down
GO:0016021	integral component of membrane	cellular_component	5	0.00258013	ENSRNOG00000012286	Il20ra	interleukin 20 receptor subunit alpha [Source:RGD Symbol;Acc:1307335]	0	0	0.758235	0	0	0	2527.45	11.3035	up
GO:0016021	integral component of membrane	cellular_component	5	0.00258013	ENSRNOG00000013481	Cdh11	cadherin 11 [Source:RGD Symbol;Acc:619742]	13.9402	23.495	20.613	7.8593	11.181	7.5212	2.18543	1.12791	up
GO:0016021	integral component of membrane	cellular_component	5	0.00258013	ENSRNOG00000013578	Trem2	triggering receptor expressed on myeloid cells 2 [Source:RGD Symbol;Acc:1309841]	7.38714	14.2293	26.9458	3.19457	3.44342	4.12088	4.51369	2.17431	up
GO:0016021	integral component of membrane	cellular_component	5	0.00258013	ENSRNOG00000014006	Neto1	neuropilin and tolloid like 1 [Source:RGD Symbol;Acc:1566269]	0.083617	0.086844	0.08791	0	0	0	861.237	9.75027	up
GO:0016021	integral component of membrane	cellular_component	5	0.00258013	ENSRNOG00000014343	Anln	anillin, actin binding protein [Source:RGD Symbol;Acc:1561367]	1.4585	2.69318	2.21254	1.12838	0.780269	1.10367	2.11273	1.07911	up
GO:0016021	integral component of membrane	cellular_component	5	0.00258013	ENSRNOG00000014603	Sgcg	sarcoglycan, gamma [Source:RGD Symbol;Acc:1359577]	6.63542	9.15155	9.08626	2.51035	4.13368	4.90106	2.15444	1.10731	up
GO:0016021	integral component of membrane	cellular_component	5	0.00258013	ENSRNOG00000015445	Mal	mal, T-cell differentiation protein [Source:RGD Symbol;Acc:3037]	4.28993	6.10298	7.71911	8.68788	11.4303	17.2031	0.485301	-1.04305	down
GO:0016021	integral component of membrane	cellular_component	5	0.00258013	ENSRNOG00000015972	Ano5	anoctamin 5 [Source:MGI Symbol;Acc:MGI:3576659]	0.209885	0.228624	0.205741	0.565561	0.631479	0.538105	0.371295	-1.42936	down
GO:0016021	integral component of membrane	cellular_component	5	0.00258013	ENSRNOG00000016632	Dsg3	desmoglein 3 [Source:RGD Symbol;Acc:1592103]	0.730607	1.46764	1.2487	0.486876	0.583329	0.606895	2.0553	1.03935	up
GO:0016021	integral component of membrane	cellular_component	5	0.00258013	ENSRNOG00000016949	Slc25a33	solute carrier family 25 member 33 [Source:RGD Symbol;Acc:1583942]	16.1568	14.3339	12.404	29.8604	28.5655	33.4012	0.467124	-1.09812	down
GO:0016021	integral component of membrane	cellular_component	5	0.00258013	ENSRNOG00000017060	Ryr2	ryanodine receptor 2 [Source:RGD Symbol;Acc:620314]	0.285075	0.300051	1.47817	0.173643	0.049516	0.188027	5.01792	2.32709	up
GO:0016021	integral component of membrane	cellular_component	5	0.00258013	ENSRNOG00000017477	Mmp23	matrix metallopeptidase 23 [Source:RGD Symbol;Acc:620201]	7.15585	8.3661	9.35647	2.48982	2.59284	4.01865	2.7335	1.45075	up
GO:0016021	integral component of membrane	cellular_component	5	0.00258013	ENSRNOG00000017606	P2rx1	purinergic receptor P2X 1 [Source:RGD Symbol;Acc:3240]	7.18568	9.04786	9.01957	19.2409	13.9678	19.8251	0.476169	-1.07045	down
GO:0016021	integral component of membrane	cellular_component	5	0.00258013	ENSRNOG00000017775	Slc5a1	solute carrier family 5 member 1 [Source:RGD Symbol;Acc:3713]	5.02389	3.24643	3.5349	9.53507	10.2527	6.94576	0.441589	-1.17922	down
GO:0016021	integral component of membrane	cellular_component	5	0.00258013	ENSRNOG00000018458	Ncr1	natural cytotoxicity triggering receptor 1 [Source:RGD Symbol;Acc:621288]	1.96699	1.6244	1.639	4.69858	2.21644	4.77204	0.447536	-1.15992	down
GO:0016021	integral component of membrane	cellular_component	5	0.00258013	ENSRNOG00000019587	Ptprn	protein tyrosine phosphatase, receptor type, N [Source:RGD Symbol;Acc:620777]	0.404913	0.311202	1.36381	0.178802	0.024688	0.090892	7.0654	2.82077	up
GO:0016021	integral component of membrane	cellular_component	5	0.00258013	ENSRNOG00000020484	Trpm5	transient receptor potential cation channel, subfamily M, member 5 [Source:RGD Symbol;Acc:1310620]	7.2614	1.93473	3.55776	17.4263	11.9153	18.1559	0.268517	-1.89691	down
GO:0016021	integral component of membrane	cellular_component	5	0.00258013	ENSRNOG00000020833	Cspg5	chondroitin sulfate proteoglycan 5 [Source:RGD Symbol;Acc:2431]	1.01362	1.31543	1.50196	0.355355	0.368381	0.655816	2.77699	1.47352	up
GO:0016021	integral component of membrane	cellular_component	5	0.00258013	ENSRNOG00000020837	Cd300lg	Cd300 molecule-like family member G [Source:RGD Symbol;Acc:1584376]	1.60214	0.651749	3.22129	0.235774	0.385302	0.551614	4.6689	2.22308	up
GO:0016021	integral component of membrane	cellular_component	5	0.00258013	ENSRNOG00000020901	S1pr5	sphingosine-1-phosphate receptor 5 [Source:RGD Symbol;Acc:620566]	1.96026	1.50384	1.86566	3.51863	3.70608	6.33429	0.393078	-1.34711	down
GO:0016021	integral component of membrane	cellular_component	5	0.00258013	ENSRNOG00000021243	Siglec1	sialic acid binding Ig like lectin 1 [Source:RGD Symbol;Acc:1311953]	4.52656	3.09607	5.36833	2.4411	1.26921	2.20243	2.19711	1.13561	up
GO:0016021	integral component of membrane	cellular_component	5	0.00258013	ENSRNOG00000021546	Sit1	signaling threshold regulating transmembrane adaptor 1 [Source:RGD Symbol;Acc:1559919]	1.07776	0.720659	1.29333	2.51028	1.88185	3.02458	0.416862	-1.26236	down
GO:0016021	integral component of membrane	cellular_component	5	0.00258013	ENSRNOG00000022067	Tlr5	toll-like receptor 5 [Source:RGD Symbol;Acc:631351]	3.79088	2.48157	3.94515	1.49858	1.60221	1.77419	2.09592	1.06759	up
GO:0016021	integral component of membrane	cellular_component	5	0.00258013	ENSRNOG00000022309	Frem1	Fras1 related extracellular matrix 1 [Source:RGD Symbol;Acc:1306981]	1.36901	2.59813	0.963709	0.737613	0.47728	0.596065	2.72279	1.44508	up
GO:0016021	integral component of membrane	cellular_component	5	0.00258013	ENSRNOG00000022432	Tmem59l	transmembrane protein 59-like [Source:RGD Symbol;Acc:1305557]	12.1227	16.0972	15.7178	5.26708	6.31898	6.10206	2.48402	1.31268	up
GO:0016021	integral component of membrane	cellular_component	5	0.00258013	ENSRNOG00000023449	Atg9b	autophagy related 9B [Source:RGD Symbol;Acc:1560887]	0.062881	0.105623	0.519309	0	0	0.006305	109.09	6.76938	up
GO:0016021	integral component of membrane	cellular_component	5	0.00258013	ENSRNOG00000024578	Ttyh2	tweety family member 2 [Source:RGD Symbol;Acc:1562969]	7.71331	7.85453	7.28898	3.37533	3.38135	3.32008	2.26827	1.18159	up
GO:0016021	integral component of membrane	cellular_component	5	0.00258013	ENSRNOG00000024903	Slc7a13	solute carrier family 7 member 13 [Source:RGD Symbol;Acc:1311633]	0.127032	0.106233	0.124536	1.28615	0.650971	0.667867	0.137352	-2.86405	down
GO:0016021	integral component of membrane	cellular_component	5	0.00258013	ENSRNOG00000025460	Tmem71	transmembrane protein 71 [Source:RGD Symbol;Acc:1593414]	2.57896	3.5347	2.74321	4.66104	5.69138	8.43791	0.471353	-1.08512	down
GO:0016021	integral component of membrane	cellular_component	5	0.00258013	ENSRNOG00000025463	LOC100125362	hypothetical protein LOC100125362 [Source:RGD Symbol;Acc:1642426]	0.350892	0.548834	0.348181	0.191479	0.120662	0.109377	2.96051	1.56584	up
GO:0016021	integral component of membrane	cellular_component	5	0.00258013	ENSRNOG00000025882	Nipal1	NIPA-like domain containing 1 [Source:RGD Symbol;Acc:1310092]	0.236074	0.535834	0.640745	1.73993	1.25087	2.03401	0.281136	-1.83066	down
GO:0016021	integral component of membrane	cellular_component	5	0.00258013	ENSRNOG00000029308	Lrmp	lymphoid-restricted membrane protein [Source:MGI Symbol;Acc:MGI:108424]	22.0111	10.3291	16.3565	35.9101	27.778	41.1705	0.464405	-1.10654	down
GO:0016021	integral component of membrane	cellular_component	5	0.00258013	ENSRNOG00000030515	Nfasc	neurofascin [Source:RGD Symbol;Acc:620911]	0.0215103	0.0189856	0.293672	0.00693821	0.00924876	0	20.6443	4.36767	up
GO:0016021	integral component of membrane	cellular_component	5	0.00258013	ENSRNOG00000030537	Slc26a11	solute carrier family 26 member 11 [Source:RGD Symbol;Acc:1306178]	6.84628	6.70089	8.1726	4.02064	3.4052	3.16109	2.05157	1.03673	up
GO:0016021	integral component of membrane	cellular_component	5	0.00258013	ENSRNOG00000031249	Slco1a2	solute carrier organic anion transporter family, member 1A2 [Source:RGD Symbol;Acc:70985]	8.01298	7.7205	7.23905	17.1036	14.73	19.8891	0.444148	-1.17089	down
GO:0016021	integral component of membrane	cellular_component	5	0.00258013	ENSRNOG00000031536	Syndig1	synapse differentiation inducing 1 [Source:RGD Symbol;Acc:1310753]	3.11116	2.77016	1.96867	5.58928	6.40608	5.16542	0.457438	-1.12835	down
GO:0016021	integral component of membrane	cellular_component	5	0.00258013	ENSRNOG00000032871	Mlc1	modulator of VRAC current 1 [Source:RGD Symbol;Acc:1308552]	2.77574	1.49853	1.20774	4.12707	7.92023	3.89051	0.343963	-1.53968	down
GO:0016021	integral component of membrane	cellular_component	5	0.00258013	ENSRNOG00000033220	Oas1f	2 ' -5 ' oligoadenylate synthetase 1K [Source:RGD Symbol;Acc:1359279]	5.23307	3.89105	3.42366	9.0953	7.36568	11.0517	0.456073	-1.13266	down
GO:0016021	integral component of membrane	cellular_component	5	0.00258013	ENSRNOG00000033234	Ccrl2	C-C motif chemokine receptor like 2 [Source:RGD Symbol;Acc:1311811]	7.3731	6.65768	5.30731	12.9877	11.6706	14.5202	0.493589	-1.01862	down
GO:0016021	integral component of membrane	cellular_component	5	0.00258013	ENSRNOG00000033665	Mrgprx2	MAS related GPR family member X2 [Source:RGD Symbol;Acc:738048]	0.171468	0.190138	0.359547	0.049627	0.077265	0.076182	3.55118	1.8283	up
GO:0016021	integral component of membrane	cellular_component	5	0.00258013	ENSRNOG00000033837	Cdh9	cadherin 9 [Source:RGD Symbol;Acc:1308343]	0	0	0	0.210953	0.147315	0.112743	0.000636928	-10.6166	down
GO:0016021	integral component of membrane	cellular_component	5	0.00258013	ENSRNOG00000036711	Spn	sialophorin [Source:RGD Symbol;Acc:3750]	6.88598	6.45845	6.84351	11.3828	12.0279	22.4867	0.439849	-1.18492	down
GO:0016021	integral component of membrane	cellular_component	5	0.00258013	ENSRNOG00000036984	Slco1a1	solute carrier organic anion transporter family, member 1a1 [Source:RGD Symbol;Acc:3700]	0.317929	0.628859	0.396718	0.058162	0.110115	0.019966	7.13708	2.83533	up
GO:0016021	integral component of membrane	cellular_component	5	0.00258013	ENSRNOG00000037331	Cd33	CD33 molecule [Source:RGD Symbol;Acc:1596020]	10.5426	13.9198	13.8458	5.21217	6.43735	5.94107	2.17777	1.12285	up
GO:0016021	integral component of membrane	cellular_component	5	0.00258013	ENSRNOG00000037563	Cd68	Cd68 molecule [Source:RGD Symbol;Acc:1305970]	75.5859	71.5358	91.732	32.3381	37.7388	35.3836	2.26486	1.17942	up
GO:0016021	integral component of membrane	cellular_component	5	0.00258013	ENSRNOG00000038197	Cd226	CD226 molecule [Source:RGD Symbol;Acc:1311513]	0.859597	0.545065	0.951736	1.53046	1.35368	1.85631	0.497084	-1.00844	down
GO:0016021	integral component of membrane	cellular_component	5	0.00258013	ENSRNOG00000039390	Slc37a2	solute carrier family 37 member 2 [Source:RGD Symbol;Acc:1564160]	1.97428	2.51988	3.94794	1.16326	1.15279	1.37104	2.28964	1.19512	up
GO:0016021	integral component of membrane	cellular_component	5	0.00258013	ENSRNOG00000039464	Tmem229a	transmembrane protein 229A [Source:RGD Symbol;Acc:1590212]	0.216408	0.090045	0.148419	0.715858	0.368959	0.857113	0.234237	-2.09396	down
GO:0016021	integral component of membrane	cellular_component	5	0.00258013	ENSRNOG00000042360	Treml4	triggering receptor expressed on myeloid cells-like 4 [Source:NCBI gene;Acc:680862]	0.46111	0.446588	0.524298	1.20355	2.50243	1.68933	0.265415	-1.91368	down
GO:0016021	integral component of membrane	cellular_component	5	0.00258013	ENSRNOG00000045595	Tnfsf9	TNF superfamily member 9 [Source:RGD Symbol;Acc:727974]	1.37669	1.19038	1.76987	0.488094	0.275907	0.330177	3.96364	1.98683	up
GO:0016021	integral component of membrane	cellular_component	5	0.00258013	ENSRNOG00000046764	Tmprss11a	transmembrane serine protease 11A [Source:RGD Symbol;Acc:1596322]	0	0	9.5822	0	0	0	31940.7	14.9631	up
GO:0016021	integral component of membrane	cellular_component	5	0.00258013	ENSRNOG00000048145	Sstr1	somatostatin receptor 1 [Source:RGD Symbol;Acc:3762]	0.23218	0.180356	0.12633	0.504885	0.640927	0.601976	0.308313	-1.69753	down
GO:0016021	integral component of membrane	cellular_component	5	0.00258013	ENSRNOG00000048239	Cxcr1	C-X-C motif chemokine receptor 1 [Source:RGD Symbol;Acc:2905]	12.0581	12.2964	6.19431	5.02716	3.39089	4.10572	2.43926	1.28645	up
GO:0016021	integral component of membrane	cellular_component	5	0.00258013	ENSRNOG00000048882	AABR07034992		0	0.690848	1.81249	0	0	0	8344.46	13.0266	up
GO:0016021	integral component of membrane	cellular_component	5	0.00258013	ENSRNOG00000050220	Nrxn1	neurexin 1 [Source:RGD Symbol;Acc:628659]	0.558072	0.451492	0.290124	1.63738	1.09146	0.868123	0.36133	-1.46861	down
GO:0016021	integral component of membrane	cellular_component	5	0.00258013	ENSRNOG00000050998	AABR07044397		0	10.0785	0	0	0	0	33594.9	15.036	up
GO:0016021	integral component of membrane	cellular_component	5	0.00258013	ENSRNOG00000051854	Enpep	glutamyl aminopeptidase [Source:RGD Symbol;Acc:621228]	18.815	14.6776	10.9005	33.2081	30.5951	30.1322	0.472593	-1.08133	down
GO:0016021	integral component of membrane	cellular_component	5	0.00258013	ENSRNOG00000052803	Klri1	killer cell lectin-like receptor family I member 1 [Source:RGD Symbol;Acc:1359344]	1.92676	2.04797	2.17747	4.23308	3.18298	6.56409	0.440067	-1.18421	down
GO:0016021	integral component of membrane	cellular_component	5	0.00258013	ENSRNOG00000053301	LOC685767	similar to OX-2 membrane glycoprotein precursor (MRC OX-2 antigen) (CD200 antigen) [Source:RGD Symbol;Acc:1590201]	0.72275	0.219837	0.463604	1.57306	1.79338	1.73865	0.275449	-1.86014	down
GO:0016021	integral component of membrane	cellular_component	5	0.00258013	ENSRNOG00000054218	Il18rap	interleukin 18 receptor accessory protein [Source:RGD Symbol;Acc:727867]	0.952382	0.874742	0.928804	2.62494	1.36523	2.00221	0.459906	-1.12059	down
GO:0016021	integral component of membrane	cellular_component	5	0.00258013	ENSRNOG00000054360	Tspan11	tetraspanin 11 [Source:RGD Symbol;Acc:1305424]	6.07758	5.91817	4.9053	2.45225	2.02185	1.79301	2.69678	1.43124	up
GO:0016021	integral component of membrane	cellular_component	5	0.00258013	ENSRNOG00000056970	AABR07063425		1.15622	1.81983	0	0	0	0	9920.15	13.2761	up
GO:0016021	integral component of membrane	cellular_component	5	0.00258013	ENSRNOG00000057092	Slfn4	schlafen 4 [Source:RGD Symbol;Acc:620455]	21.7386	11.4292	13.1179	72.3427	28.11	100.08	0.230813	-2.1152	down
GO:0016021	integral component of membrane	cellular_component	5	0.00258013	ENSRNOG00000057335	Clec1b	C-type lectin domain family 1, member B [Source:RGD Symbol;Acc:1563517]	1.21217	2.20758	0.914233	3.16015	4.82792	4.73455	0.340652	-1.55363	down
GO:0016021	integral component of membrane	cellular_component	5	0.00258013	ENSRNOG00000058692	Slc26a4	solute carrier family 26 member 4 [Source:RGD Symbol;Acc:3293]	4.03381	8.98354	10.6969	1.03707	0.715431	0.934049	8.82701	3.14192	up
GO:0016021	integral component of membrane	cellular_component	5	0.00258013	ENSRNOG00000058714	Klre1	killer cell lectin-like receptor, family E, member 1 [Source:RGD Symbol;Acc:727903]	1.41711	1.79425	1.54913	5.00401	2.61277	6.33873	0.341119	-1.55165	down
GO:0016021	integral component of membrane	cellular_component	5	0.00258013	ENSRNOG00000059362	Has3	hyaluronan synthase 3 [Source:RGD Symbol;Acc:628656]	0.551376	0.941067	0.708262	0.367742	0.312288	0.140207	2.68301	1.42385	up
GO:0016021	integral component of membrane	cellular_component	5	0.00258013	ENSRNOG00000060246	Klrd1	killer cell lectin like receptor D1 [Source:RGD Symbol;Acc:2978]	3.34348	2.3231	3.44577	7.56228	4.74204	9.73844	0.413394	-1.27441	down
GO:0030141	secretory granule	cellular_component	8	0.00260172	ENSRNOG00000003897	Col1a1	collagen type I alpha 1 chain [Source:RGD Symbol;Acc:61817]	126.27	249.911	273.591	58.1167	63.4283	51.677	3.75109	1.90731	up
GO:0030141	secretory granule	cellular_component	8	0.00260172	ENSRNOG00000006426	Syt1	synaptotagmin 1 [Source:RGD Symbol;Acc:3803]	0.535581	0.254328	0.726439	1.20032	1.83951	1.33849	0.346332	-1.52977	down
GO:0030141	secretory granule	cellular_component	8	0.00260172	ENSRNOG00000011824	Trh	thyrotropin releasing hormone [Source:RGD Symbol;Acc:3903]	0.198757	0.928469	2.94448	0	0.220139	0.033459	16.0558	4.00502	up
GO:0030141	secretory granule	cellular_component	8	0.00260172	ENSRNOG00000016945	Pla2g2a	phospholipase A2 group IIA [Source:RGD Symbol;Acc:620857]	31.8882	19.843	49.1573	12.1527	19.2349	10.06	2.43412	1.2834	up
GO:0030141	secretory granule	cellular_component	8	0.00260172	ENSRNOG00000019587	Ptprn	protein tyrosine phosphatase, receptor type, N [Source:RGD Symbol;Acc:620777]	0.404913	0.311202	1.36381	0.178802	0.024688	0.090892	7.0654	2.82077	up
GO:0030141	secretory granule	cellular_component	8	0.00260172	ENSRNOG00000020563	Cma1	chymase 1 [Source:RGD Symbol;Acc:2365]	1.06288	11.2426	14.4618	0.948545	1.00838	1.53025	7.6759	2.94034	up
GO:0006882	cellular zinc ion homeostasis	biological_process	12	0.00261522	ENSRNOG00000025764	AC128848		30.5978	27.9313	24.8656	8.8741	12.1067	11.3119	2.58246	1.36875	up
GO:0006882	cellular zinc ion homeostasis	biological_process	12	0.00261522	ENSRNOG00000038047	Mt1	metallothionein 1 [Source:RGD Symbol;Acc:3117]	6.48477	4.81513	5.14986	2.71678	1.77605	2.19561	2.45943	1.29833	up
GO:0006882	cellular zinc ion homeostasis	biological_process	12	0.00261522	ENSRNOG00000043098	Mt2A	metallothionein 2A [Source:RGD Symbol;Acc:1592345]	22.5488	25.925	34.0743	11.7397	14.0395	14.0706	2.07148	1.05066	up
GO:0032729	positive regulation of interferon-gamma production	biological_process	8	0.00283303	ENSRNOG00000025925	Txk	TXK tyrosine kinase [Source:RGD Symbol;Acc:1306481]	1.86157	1.7651	1.7296	3.59851	2.5356	5.25992	0.470094	-1.08898	down
GO:0032729	positive regulation of interferon-gamma production	biological_process	8	0.00283303	ENSRNOG00000038197	Cd226	CD226 molecule [Source:RGD Symbol;Acc:1311513]	0.859597	0.545065	0.951736	1.53046	1.35368	1.85631	0.497084	-1.00844	down
GO:0032729	positive regulation of interferon-gamma production	biological_process	8	0.00283303	ENSRNOG00000045595	Tnfsf9	TNF superfamily member 9 [Source:RGD Symbol;Acc:727974]	1.37669	1.19038	1.76987	0.488094	0.275907	0.330177	3.96364	1.98683	up
GO:0032729	positive regulation of interferon-gamma production	biological_process	8	0.00283303	ENSRNOG00000058714	Klre1	killer cell lectin-like receptor, family E, member 1 [Source:RGD Symbol;Acc:727903]	1.41711	1.79425	1.54913	5.00401	2.61277	6.33873	0.341119	-1.55165	down
GO:0045954	positive regulation of natural killer cell mediated cytotoxicity	biological_process	8	0.0030433	ENSRNOG00000006263	Sh2d1a	SH2 domain containing 1A [Source:RGD Symbol;Acc:1562408]	0.762223	0.828636	1.31519	3.17378	2.3662	3.14758	0.334508	-1.57989	down
GO:0045954	positive regulation of natural killer cell mediated cytotoxicity	biological_process	8	0.0030433	ENSRNOG00000054218	Il18rap	interleukin 18 receptor accessory protein [Source:RGD Symbol;Acc:727867]	0.952382	0.874742	0.928804	2.62494	1.36523	2.00221	0.459906	-1.12059	down
GO:0045954	positive regulation of natural killer cell mediated cytotoxicity	biological_process	8	0.0030433	ENSRNOG00000058714	Klre1	killer cell lectin-like receptor, family E, member 1 [Source:RGD Symbol;Acc:727903]	1.41711	1.79425	1.54913	5.00401	2.61277	6.33873	0.341119	-1.55165	down
GO:0090190	positive regulation of branching involved in ureteric bud morphogenesis	biological_process	10	0.0030433	ENSRNOG00000023683	Nog	noggin [Source:RGD Symbol;Acc:3183]	1.3224	2.21724	1.19676	0.464518	0.534484	0.368221	3.46425	1.79254	up
GO:0090190	positive regulation of branching involved in ureteric bud morphogenesis	biological_process	10	0.0030433	ENSRNOG00000026053	Grem1	gremlin 1, DAN family BMP antagonist [Source:RGD Symbol;Acc:2359]	0.95987	2.57523	2.25854	0.284014	0.14634	0.159551	9.82132	3.29592	up
GO:0090190	positive regulation of branching involved in ureteric bud morphogenesis	biological_process	10	0.0030433	ENSRNOG00000026203	Pax8	paired box 8 [Source:RGD Symbol;Acc:620434]	0.679274	0.646556	1.36295	0.21796	0.383172	0.130189	3.6766	1.87837	up
GO:0005911	cell-cell junction	cellular_component	4	0.00313679	ENSRNOG00000014170	Dbn1	drebrin 1 [Source:RGD Symbol;Acc:70885]	10.9214	12.9572	10.2577	6.1132	4.51819	6.14413	2.03489	1.02495	up
GO:0005911	cell-cell junction	cellular_component	4	0.00313679	ENSRNOG00000016632	Dsg3	desmoglein 3 [Source:RGD Symbol;Acc:1592103]	0.730607	1.46764	1.2487	0.486876	0.583329	0.606895	2.0553	1.03935	up
GO:0005911	cell-cell junction	cellular_component	4	0.00313679	ENSRNOG00000017775	Slc5a1	solute carrier family 5 member 1 [Source:RGD Symbol;Acc:3713]	5.02389	3.24643	3.5349	9.53507	10.2527	6.94576	0.441589	-1.17922	down
GO:0005911	cell-cell junction	cellular_component	4	0.00313679	ENSRNOG00000022533	Micall2	MICAL-like 2 [Source:RGD Symbol;Acc:1307875]	2.02891	2.05633	4.06871	1.46972	0.930644	1.29824	2.2046	1.14052	up
GO:0005911	cell-cell junction	cellular_component	4	0.00313679	ENSRNOG00000024365	Ect2	epithelial cell transforming 2 [Source:RGD Symbol;Acc:1308524]	1.29219	2.68213	3.60527	1.27175	1.0084	0.842832	2.42703	1.27919	up
GO:0005911	cell-cell junction	cellular_component	4	0.00313679	ENSRNOG00000027894	Iqgap3	IQ motif containing GTPase activating protein 3 [Source:RGD Symbol;Acc:1305951]	1.60168	2.19219	2.04078	0.916376	0.778468	1.20012	2.01545	1.0111	up
GO:0005911	cell-cell junction	cellular_component	4	0.00313679	ENSRNOG00000030210	Fndc1	fibronectin type III domain containing 1 [Source:RGD Symbol;Acc:1310640]	7.27699	15.3231	10.2437	1.47901	0.612771	1.6005	8.89525	3.15303	up
GO:0005911	cell-cell junction	cellular_component	4	0.00313679	ENSRNOG00000032871	Mlc1	modulator of VRAC current 1 [Source:RGD Symbol;Acc:1308552]	2.77574	1.49853	1.20774	4.12707	7.92023	3.89051	0.343963	-1.53968	down
GO:0070100	negative regulation of chemokine-mediated signaling pathway	biological_process	10	0.00315492	ENSRNOG00000007574	Padi2	peptidyl arginine deiminase 2 [Source:RGD Symbol;Acc:3288]	1.05408	0.426038	0.672806	1.90207	1.87646	2.07766	0.367632	-1.44367	down
GO:0070100	negative regulation of chemokine-mediated signaling pathway	biological_process	10	0.00315492	ENSRNOG00000010906	Ccl5	C-C motif chemokine ligand 5 [Source:RGD Symbol;Acc:69069]	48.3284	41.7605	33.5398	89.039	63.5136	135.101	0.429784	-1.21832	down
GO:0010757	negative regulation of plasminogen activation	biological_process	11	0.00315492	ENSRNOG00000010935	Cpb2	carboxypeptidase B2 [Source:RGD Symbol;Acc:71035]	0.417813	0.940398	0.194739	0	0	0	5176.5	12.3378	up
GO:0010757	negative regulation of plasminogen activation	biological_process	11	0.00315492	ENSRNOG00000015461	Serpine2	serpin family E member 2 [Source:RGD Symbol;Acc:3748]	21.8704	32.5856	37.2124	17.0684	13.4899	15.117	2.00695	1.00501	up
GO:0031232	extrinsic component of external side of plasma membrane	cellular_component	6	0.00315492	ENSRNOG00000009342	Fcnb	ficolin B [Source:RGD Symbol;Acc:621222]	6.86838	5.02796	3.18654	12.0512	8.59387	23.5555	0.341237	-1.55115	down
GO:0031232	extrinsic component of external side of plasma membrane	cellular_component	6	0.00315492	ENSRNOG00000015461	Serpine2	serpin family E member 2 [Source:RGD Symbol;Acc:3748]	21.8704	32.5856	37.2124	17.0684	13.4899	15.117	2.00695	1.00501	up
GO:0000050	urea cycle	biological_process	8	0.00315492	ENSRNOG00000013304	Arg1	arginase 1 [Source:RGD Symbol;Acc:2150]	8.35733	12.4054	14.4375	5.09255	6.15658	5.0671	2.15737	1.10928	up
GO:0000050	urea cycle	biological_process	8	0.00315492	ENSRNOG00000013704	Cps1	carbamoyl-phosphate synthase 1 [Source:RGD Symbol;Acc:2395]	0.0296366	0.0318274	0.0321218	0	0	0	311.953	8.28518	up
GO:0001957	intramembranous ossification	biological_process	6	0.00315492	ENSRNOG00000003897	Col1a1	collagen type I alpha 1 chain [Source:RGD Symbol;Acc:61817]	126.27	249.911	273.591	58.1167	63.4283	51.677	3.75109	1.90731	up
GO:0001957	intramembranous ossification	biological_process	6	0.00315492	ENSRNOG00000021155	Ctsk	cathepsin K [Source:RGD Symbol;Acc:61810]	8.68873	18.433	39.2286	5.53409	8.14942	6.72412	3.25125	1.70099	up
GO:0072307	regulation of metanephric nephron tubule epithelial cell differentiation	biological_process	10	0.00315492	ENSRNOG00000007002	Lif	LIF, interleukin 6 family cytokine [Source:RGD Symbol;Acc:620865]	0.880568	1.01865	1.04408	0.472627	0.322036	0.294568	2.70218	1.43413	up
GO:0072307	regulation of metanephric nephron tubule epithelial cell differentiation	biological_process	10	0.00315492	ENSRNOG00000026203	Pax8	paired box 8 [Source:RGD Symbol;Acc:620434]	0.679274	0.646556	1.36295	0.21796	0.383172	0.130189	3.6766	1.87837	up
GO:0005828	kinetochore microtubule	cellular_component	9	0.00315492	ENSRNOG00000009339	Cenpe	centromere protein E [Source:RGD Symbol;Acc:1307115]	0.788656	1.3332	1.09251	0.574257	0.391805	0.597516	2.05577	1.03968	up
GO:0005828	kinetochore microtubule	cellular_component	9	0.00315492	ENSRNOG00000033658	Kntc1	kinetochore associated 1 [Source:RGD Symbol;Acc:1307905]	0.530284	1.09944	1.28499	0.561977	0.273268	0.368844	2.42068	1.27541	up
GO:0001913	T cell mediated cytotoxicity	biological_process	5	0.00315492	ENSRNOG00000000562	Prf1	perforin 1 [Source:RGD Symbol;Acc:708463]	11.7317	8.28855	6.91728	21.9426	12.0857	30.3654	0.418325	-1.2573	down
GO:0001913	T cell mediated cytotoxicity	biological_process	5	0.00315492	ENSRNOG00000030530	Gzmm	granzyme M [Source:RGD Symbol;Acc:620022]	15.5155	10.2956	10.456	27.0434	19.0509	36.6771	0.43816	-1.19047	down
GO:0050544	arachidonic acid binding	molecular_function	8	0.00315492	ENSRNOG00000011483	S100a9	S100 calcium binding protein A9 [Source:RGD Symbol;Acc:620267]	20.221	25.7548	22.6237	43.4388	35.8205	91.6187	0.401453	-1.3167	down
GO:0050544	arachidonic acid binding	molecular_function	8	0.00315492	ENSRNOG00000011557	S100a8	S100 calcium binding protein A8 [Source:RGD Symbol;Acc:620265]	6.86219	14.8878	7.83776	25.2298	19.4616	46.9158	0.322986	-1.63046	down
GO:0042379	chemokine receptor binding	molecular_function	7	0.00315492	ENSRNOG00000010906	Ccl5	C-C motif chemokine ligand 5 [Source:RGD Symbol;Acc:69069]	48.3284	41.7605	33.5398	89.039	63.5136	135.101	0.429784	-1.21832	down
GO:0042379	chemokine receptor binding	molecular_function	7	0.00315492	ENSRNOG00000034290	Ccl21	C-C motif chemokine ligand 21 [Source:RGD Symbol;Acc:1311996]	71.933	100.476	149.957	63.5991	39.5568	57.0998	2.01157	1.00832	up
GO:0043515	kinetochore binding	molecular_function	5	0.00315492	ENSRNOG00000009339	Cenpe	centromere protein E [Source:RGD Symbol;Acc:1307115]	0.788656	1.3332	1.09251	0.574257	0.391805	0.597516	2.05577	1.03968	up
GO:0043515	kinetochore binding	molecular_function	5	0.00315492	ENSRNOG00000029055	Ttk	Ttk protein kinase [Source:RGD Symbol;Acc:1305558]	0.567316	1.43363	1.35383	0.510706	0.373299	0.471024	2.4758	1.30789	up
GO:0002548	monocyte chemotaxis	biological_process	6	0.00351197	ENSRNOG00000028548	Ccl9	chemokine (C-C motif) ligand 9 [Source:RGD Symbol;Acc:1310563]	31.354	22.2453	32.1143	12.7972	13.0843	8.17364	2.5169	1.33165	up
GO:0002548	monocyte chemotaxis	biological_process	6	0.00351197	ENSRNOG00000031162	Ccl24	C-C motif chemokine ligand 24 [Source:RGD Symbol;Acc:1310245]	2.95267	4.5172	2.6358	1.47836	0.899061	1.85835	2.38579	1.25447	up
GO:0002548	monocyte chemotaxis	biological_process	6	0.00351197	ENSRNOG00000034290	Ccl21	C-C motif chemokine ligand 21 [Source:RGD Symbol;Acc:1311996]	71.933	100.476	149.957	63.5991	39.5568	57.0998	2.01157	1.00832	up
GO:0048247	lymphocyte chemotaxis	biological_process	6	0.00351197	ENSRNOG00000028548	Ccl9	chemokine (C-C motif) ligand 9 [Source:RGD Symbol;Acc:1310563]	31.354	22.2453	32.1143	12.7972	13.0843	8.17364	2.5169	1.33165	up
GO:0048247	lymphocyte chemotaxis	biological_process	6	0.00351197	ENSRNOG00000031162	Ccl24	C-C motif chemokine ligand 24 [Source:RGD Symbol;Acc:1310245]	2.95267	4.5172	2.6358	1.47836	0.899061	1.85835	2.38579	1.25447	up
GO:0048247	lymphocyte chemotaxis	biological_process	6	0.00351197	ENSRNOG00000034290	Ccl21	C-C motif chemokine ligand 21 [Source:RGD Symbol;Acc:1311996]	71.933	100.476	149.957	63.5991	39.5568	57.0998	2.01157	1.00832	up
GO:0007267	cell-cell signaling	biological_process	5	0.00369542	ENSRNOG00000006263	Sh2d1a	SH2 domain containing 1A [Source:RGD Symbol;Acc:1562408]	0.762223	0.828636	1.31519	3.17378	2.3662	3.14758	0.334508	-1.57989	down
GO:0007267	cell-cell signaling	biological_process	5	0.00369542	ENSRNOG00000008816	Gpnmb	glycoprotein nmb [Source:RGD Symbol;Acc:71008]	193.456	246.629	303.418	84.0387	88.9556	65.1415	3.12218	1.64255	up
GO:0007267	cell-cell signaling	biological_process	5	0.00369542	ENSRNOG00000010906	Ccl5	C-C motif chemokine ligand 5 [Source:RGD Symbol;Acc:69069]	48.3284	41.7605	33.5398	89.039	63.5136	135.101	0.429784	-1.21832	down
GO:0007267	cell-cell signaling	biological_process	5	0.00369542	ENSRNOG00000026053	Grem1	gremlin 1, DAN family BMP antagonist [Source:RGD Symbol;Acc:2359]	0.95987	2.57523	2.25854	0.284014	0.14634	0.159551	9.82132	3.29592	up
GO:0009617	response to bacterium	biological_process	7	0.00373517	ENSRNOG00000012458	Cyp2e1	cytochrome P450, family 2, subfamily e, polypeptide 1 [Source:RGD Symbol;Acc:2475]	5.70974	4.74285	4.83838	17.7295	21.6301	20.9411	0.253579	-1.97949	down
GO:0009617	response to bacterium	biological_process	7	0.00373517	ENSRNOG00000013973	Lcn2	lipocalin 2 [Source:RGD Symbol;Acc:69408]	399.193	738.611	424.407	107.199	115.007	143.758	4.26876	2.09382	up
GO:0009617	response to bacterium	biological_process	7	0.00373517	ENSRNOG00000015408	Vil1	villin 1 [Source:RGD Symbol;Acc:1307048]	0.852	0.23051	0.408527	1.89595	1.63924	3.09661	0.224832	-2.15308	down
GO:0009617	response to bacterium	biological_process	7	0.00373517	ENSRNOG00000019050	Ifit1	interferon-induced protein with tetratricopeptide repeats 1 [Source:RGD Symbol;Acc:620599]	10.0484	9.65548	5.40845	21.5586	30.666	25.6832	0.322334	-1.63337	down
GO:0009617	response to bacterium	biological_process	7	0.00373517	ENSRNOG00000032247	Bank1	B-cell scaffold protein with ankyrin repeats 1 [Source:RGD Symbol;Acc:1564639]	5.5174	3.95656	3.67413	8.59685	9.43	8.91938	0.487938	-1.03523	down
GO:0009617	response to bacterium	biological_process	7	0.00373517	ENSRNOG00000037198	Usp18	ubiquitin specific peptidase 18 [Source:RGD Symbol;Acc:1359153]	13.1785	11.7285	9.52241	26.2124	16.1245	31.1509	0.468505	-1.09387	down
GO:0004222	metalloendopeptidase activity	molecular_function	8	0.00431921	ENSRNOG00000001715	Ece2	endothelin-converting enzyme 2 [Source:RGD Symbol;Acc:1303039]	1.446	2.21214	2.62232	0.919415	0.708033	1.19424	2.22578	1.15431	up
GO:0004222	metalloendopeptidase activity	molecular_function	8	0.00431921	ENSRNOG00000003538	Adamts4	ADAM metallopeptidase with thrombospondin type 1 motif, 4 [Source:RGD Symbol;Acc:621242]	0.333219	0.394028	0.42186	0.12392	0.086845	0.17875	2.9501	1.56076	up
GO:0004222	metalloendopeptidase activity	molecular_function	8	0.00431921	ENSRNOG00000009907	Mmp8	matrix metallopeptidase 8 [Source:RGD Symbol;Acc:631408]	1.2795	0.827246	0.892774	2.57064	1.58073	4.86069	0.332834	-1.58712	down
GO:0004222	metalloendopeptidase activity	molecular_function	8	0.00431921	ENSRNOG00000017477	Mmp23	matrix metallopeptidase 23 [Source:RGD Symbol;Acc:620201]	7.15585	8.3661	9.35647	2.48982	2.59284	4.01865	2.7335	1.45075	up
GO:0004222	metalloendopeptidase activity	molecular_function	8	0.00431921	ENSRNOG00000030187	Mmp12	matrix metallopeptidase 12 [Source:RGD Symbol;Acc:620195]	0.8267	3.66773	18.8195	0.329763	0.456892	0.690975	15.7779	3.97983	up
GO:0004222	metalloendopeptidase activity	molecular_function	8	0.00431921	ENSRNOG00000061484	Adamts2	ADAM metallopeptidase with thrombospondin type 1 motif, 2 [Source:RGD Symbol;Acc:1565950]	25.0103	33.9663	18.8295	11.0781	12.1949	11.6513	2.22785	1.15565	up
GO:0050786	RAGE receptor binding	molecular_function	6	0.00437378	ENSRNOG00000011483	S100a9	S100 calcium binding protein A9 [Source:RGD Symbol;Acc:620267]	20.221	25.7548	22.6237	43.4388	35.8205	91.6187	0.401453	-1.3167	down
GO:0050786	RAGE receptor binding	molecular_function	6	0.00437378	ENSRNOG00000011557	S100a8	S100 calcium binding protein A8 [Source:RGD Symbol;Acc:620265]	6.86219	14.8878	7.83776	25.2298	19.4616	46.9158	0.322986	-1.63046	down
GO:0003337	mesenchymal to epithelial transition involved in metanephros morphogenesis	biological_process	8	0.00437378	ENSRNOG00000026053	Grem1	gremlin 1, DAN family BMP antagonist [Source:RGD Symbol;Acc:2359]	0.95987	2.57523	2.25854	0.284014	0.14634	0.159551	9.82132	3.29592	up
GO:0003337	mesenchymal to epithelial transition involved in metanephros morphogenesis	biological_process	8	0.00437378	ENSRNOG00000026203	Pax8	paired box 8 [Source:RGD Symbol;Acc:620434]	0.679274	0.646556	1.36295	0.21796	0.383172	0.130189	3.6766	1.87837	up
GO:1903980	positive regulation of microglial cell activation	biological_process	9	0.00437378	ENSRNOG00000009907	Mmp8	matrix metallopeptidase 8 [Source:RGD Symbol;Acc:631408]	1.2795	0.827246	0.892774	2.57064	1.58073	4.86069	0.332834	-1.58712	down
GO:1903980	positive regulation of microglial cell activation	biological_process	9	0.00437378	ENSRNOG00000013578	Trem2	triggering receptor expressed on myeloid cells 2 [Source:RGD Symbol;Acc:1309841]	7.38714	14.2293	26.9458	3.19457	3.44342	4.12088	4.51369	2.17431	up
GO:0035987	endodermal cell differentiation	biological_process	6	0.00517258	ENSRNOG00000009907	Mmp8	matrix metallopeptidase 8 [Source:RGD Symbol;Acc:631408]	1.2795	0.827246	0.892774	2.57064	1.58073	4.86069	0.332834	-1.58712	down
GO:0035987	endodermal cell differentiation	biological_process	6	0.00517258	ENSRNOG00000023148	Col11a1	collagen type XI alpha 1 chain [Source:RGD Symbol;Acc:2372]	0.411087	0.52551	0.885577	0.224042	0.278554	0.247892	2.42799	1.27976	up
GO:0035987	endodermal cell differentiation	biological_process	6	0.00517258	ENSRNOG00000039668	Col8a1	collagen type VIII alpha 1 chain [Source:RGD Symbol;Acc:1309361]	4.90835	6.5363	4.00716	2.58257	2.21751	1.4638	2.46681	1.30265	up
GO:0030246	carbohydrate binding	molecular_function	4	0.00531079	ENSRNOG00000009342	Fcnb	ficolin B [Source:RGD Symbol;Acc:621222]	6.86838	5.02796	3.18654	12.0512	8.59387	23.5555	0.341237	-1.55115	down
GO:0030246	carbohydrate binding	molecular_function	4	0.00531079	ENSRNOG00000021243	Siglec1	sialic acid binding Ig like lectin 1 [Source:RGD Symbol;Acc:1311953]	4.52656	3.09607	5.36833	2.4411	1.26921	2.20243	2.19711	1.13561	up
GO:0030246	carbohydrate binding	molecular_function	4	0.00531079	ENSRNOG00000048882	AABR07034992		0	0.690848	1.81249	0	0	0	8344.46	13.0266	up
GO:0030246	carbohydrate binding	molecular_function	4	0.00531079	ENSRNOG00000052803	Klri1	killer cell lectin-like receptor family I member 1 [Source:RGD Symbol;Acc:1359344]	1.92676	2.04797	2.17747	4.23308	3.18298	6.56409	0.440067	-1.18421	down
GO:0030246	carbohydrate binding	molecular_function	4	0.00531079	ENSRNOG00000053272	Chi3l1	chitinase 3 like 1 [Source:RGD Symbol;Acc:620874]	78.1203	93.0092	101.602	41.6996	35.3419	56.541	2.04167	1.02975	up
GO:0030246	carbohydrate binding	molecular_function	4	0.00531079	ENSRNOG00000057335	Clec1b	C-type lectin domain family 1, member B [Source:RGD Symbol;Acc:1563517]	1.21217	2.20758	0.914233	3.16015	4.82792	4.73455	0.340652	-1.55363	down
GO:0030246	carbohydrate binding	molecular_function	4	0.00531079	ENSRNOG00000058714	Klre1	killer cell lectin-like receptor, family E, member 1 [Source:RGD Symbol;Acc:727903]	1.41711	1.79425	1.54913	5.00401	2.61277	6.33873	0.341119	-1.55165	down
GO:0030246	carbohydrate binding	molecular_function	4	0.00531079	ENSRNOG00000060246	Klrd1	killer cell lectin like receptor D1 [Source:RGD Symbol;Acc:2978]	3.34348	2.3231	3.44577	7.56228	4.74204	9.73844	0.413394	-1.27441	down
GO:0051694	pointed-end actin filament capping	biological_process	11	0.00577487	ENSRNOG00000045831	Lmod2	leiomodin-2-like [Source:RGD Symbol;Acc:6501529]	0.180558	0.343456	2.27156	0	0.04773	0.069463	23.8544	4.57619	up
GO:0051694	pointed-end actin filament capping	biological_process	11	0.00577487	ENSRNOG00000049639	LOC100909784	leiomodin-2-like [Source:RGD Symbol;Acc:6501529]	0.089362	0.190426	1.17025	0.00309	0.023622	0.034365	23.7411	4.56931	up
GO:0043252	sodium-independent organic anion transport	biological_process	9	0.00577487	ENSRNOG00000031249	Slco1a2	solute carrier organic anion transporter family, member 1A2 [Source:RGD Symbol;Acc:70985]	8.01298	7.7205	7.23905	17.1036	14.73	19.8891	0.444148	-1.17089	down
GO:0043252	sodium-independent organic anion transport	biological_process	9	0.00577487	ENSRNOG00000036984	Slco1a1	solute carrier organic anion transporter family, member 1a1 [Source:RGD Symbol;Acc:3700]	0.317929	0.628859	0.396718	0.058162	0.110115	0.019966	7.13708	2.83533	up
GO:0045926	negative regulation of growth	biological_process	6	0.00577487	ENSRNOG00000038047	Mt1	metallothionein 1 [Source:RGD Symbol;Acc:3117]	6.48477	4.81513	5.14986	2.71678	1.77605	2.19561	2.45943	1.29833	up
GO:0045926	negative regulation of growth	biological_process	6	0.00577487	ENSRNOG00000043098	Mt2A	metallothionein 2A [Source:RGD Symbol;Acc:1592345]	22.5488	25.925	34.0743	11.7397	14.0395	14.0706	2.07148	1.05066	up
GO:0006518	peptide metabolic process	biological_process	7	0.00577487	ENSRNOG00000015902	Cpxm2	carboxypeptidase X (M14 family), member 2 [Source:RGD Symbol;Acc:1310955]	14.1973	36.6869	13.8658	3.88967	11.2868	7.934	2.80176	1.48633	up
GO:0006518	peptide metabolic process	biological_process	7	0.00577487	ENSRNOG00000020563	Cma1	chymase 1 [Source:RGD Symbol;Acc:2365]	1.06288	11.2426	14.4618	0.948545	1.00838	1.53025	7.6759	2.94034	up
GO:0009635	response to herbicide	biological_process	5	0.00577487	ENSRNOG00000013304	Arg1	arginase 1 [Source:RGD Symbol;Acc:2150]	8.35733	12.4054	14.4375	5.09255	6.15658	5.0671	2.15737	1.10928	up
GO:0009635	response to herbicide	biological_process	5	0.00577487	ENSRNOG00000013973	Lcn2	lipocalin 2 [Source:RGD Symbol;Acc:69408]	399.193	738.611	424.407	107.199	115.007	143.758	4.26876	2.09382	up
GO:0060346	bone trabecula formation	biological_process	6	0.00577487	ENSRNOG00000003897	Col1a1	collagen type I alpha 1 chain [Source:RGD Symbol;Acc:61817]	126.27	249.911	273.591	58.1167	63.4283	51.677	3.75109	1.90731	up
GO:0060346	bone trabecula formation	biological_process	6	0.00577487	ENSRNOG00000017783	Sfrp1	secreted frizzled-related protein 1 [Source:RGD Symbol;Acc:621074]	1.68002	2.38548	4.44256	1.64961	1.21244	0.920778	2.24913	1.16937	up
GO:0050891	multicellular organismal water homeostasis	biological_process	8	0.00577487	ENSRNOG00000008176	Nppa	natriuretic peptide A [Source:RGD Symbol;Acc:3193]	0	0	4.77912	0	0	0	15930.4	13.9595	up
GO:0050891	multicellular organismal water homeostasis	biological_process	8	0.00577487	ENSRNOG00000013859	Bpifa1	BPI fold containing family A, member 1 [Source:RGD Symbol;Acc:619818]	0.423531	0.205181	928.063	0.160324	0.123339	0.870753	804.469	9.65189	up
GO:0033162	melanosome membrane	cellular_component	7	0.00577487	ENSRNOG00000008816	Gpnmb	glycoprotein nmb [Source:RGD Symbol;Acc:71008]	193.456	246.629	303.418	84.0387	88.9556	65.1415	3.12218	1.64255	up
GO:0033162	melanosome membrane	cellular_component	7	0.00577487	ENSRNOG00000015774	Mreg	melanoregulin [Source:RGD Symbol;Acc:1562333]	0.740493	1.5783	3.06853	0.453484	0.431069	0.6671	3.472	1.79577	up
GO:0015347	sodium-independent organic anion transmembrane transporter activity	molecular_function	8	0.00577487	ENSRNOG00000031249	Slco1a2	solute carrier organic anion transporter family, member 1A2 [Source:RGD Symbol;Acc:70985]	8.01298	7.7205	7.23905	17.1036	14.73	19.8891	0.444148	-1.17089	down
GO:0015347	sodium-independent organic anion transmembrane transporter activity	molecular_function	8	0.00577487	ENSRNOG00000036984	Slco1a1	solute carrier organic anion transporter family, member 1a1 [Source:RGD Symbol;Acc:3700]	0.317929	0.628859	0.396718	0.058162	0.110115	0.019966	7.13708	2.83533	up
GO:0032432	actin filament bundle	cellular_component	6	0.00577487	ENSRNOG00000015408	Vil1	villin 1 [Source:RGD Symbol;Acc:1307048]	0.852	0.23051	0.408527	1.89595	1.63924	3.09661	0.224832	-2.15308	down
GO:0032432	actin filament bundle	cellular_component	6	0.00577487	ENSRNOG00000022533	Micall2	MICAL-like 2 [Source:RGD Symbol;Acc:1307875]	2.02891	2.05633	4.06871	1.46972	0.930644	1.29824	2.2046	1.14052	up
GO:0032964	collagen biosynthetic process	biological_process	5	0.00577487	ENSRNOG00000003897	Col1a1	collagen type I alpha 1 chain [Source:RGD Symbol;Acc:61817]	126.27	249.911	273.591	58.1167	63.4283	51.677	3.75109	1.90731	up
GO:0032964	collagen biosynthetic process	biological_process	5	0.00577487	ENSRNOG00000013304	Arg1	arginase 1 [Source:RGD Symbol;Acc:2150]	8.35733	12.4054	14.4375	5.09255	6.15658	5.0671	2.15737	1.10928	up
GO:0032609	interferon-gamma production	biological_process	5	0.00577487	ENSRNOG00000036711	Spn	sialophorin [Source:RGD Symbol;Acc:3750]	6.88598	6.45845	6.84351	11.3828	12.0279	22.4867	0.439849	-1.18492	down
GO:0032609	interferon-gamma production	biological_process	5	0.00577487	ENSRNOG00000054218	Il18rap	interleukin 18 receptor accessory protein [Source:RGD Symbol;Acc:727867]	0.952382	0.874742	0.928804	2.62494	1.36523	2.00221	0.459906	-1.12059	down
GO:0008017	microtubule binding	molecular_function	7	0.0058271	ENSRNOG00000009339	Cenpe	centromere protein E [Source:RGD Symbol;Acc:1307115]	0.788656	1.3332	1.09251	0.574257	0.391805	0.597516	2.05577	1.03968	up
GO:0008017	microtubule binding	molecular_function	7	0.0058271	ENSRNOG00000011483	S100a9	S100 calcium binding protein A9 [Source:RGD Symbol;Acc:620267]	20.221	25.7548	22.6237	43.4388	35.8205	91.6187	0.401453	-1.3167	down
GO:0008017	microtubule binding	molecular_function	7	0.0058271	ENSRNOG00000011557	S100a8	S100 calcium binding protein A8 [Source:RGD Symbol;Acc:620265]	6.86219	14.8878	7.83776	25.2298	19.4616	46.9158	0.322986	-1.63046	down
GO:0008017	microtubule binding	molecular_function	7	0.0058271	ENSRNOG00000019100	Kif2c	kinesin family member 2C [Source:RGD Symbol;Acc:620239]	1.12797	1.74616	2.14007	0.711131	0.585884	0.897951	2.28441	1.19182	up
GO:0008017	microtubule binding	molecular_function	7	0.0058271	ENSRNOG00000023993	Kif1a	kinesin family member 1A [Source:RGD Symbol;Acc:1304996]	0.166506	0.124253	0.194855	0.636146	0.353681	0.430159	0.341985	-1.54799	down
GO:0008017	microtubule binding	molecular_function	7	0.0058271	ENSRNOG00000025120	Gli1	GLI family zinc finger 1 [Source:RGD Symbol;Acc:621673]	3.07771	4.09095	3.67171	1.56395	1.68971	1.52278	2.26955	1.18241	up
GO:0008017	microtubule binding	molecular_function	7	0.0058271	ENSRNOG00000025198	Gas2l3	growth arrest-specific 2 like 3 [Source:RGD Symbol;Acc:1594151]	0.699026	1.3698	1.34355	0.469232	0.403743	0.326446	2.84503	1.50844	up
GO:0008017	microtubule binding	molecular_function	7	0.0058271	ENSRNOG00000027542	LOC100302465	hypothetical LOC100302465 [Source:RGD Symbol;Acc:2311471]	0.0181206	0	0.0289175	0.163897	0.206534	0.260131	0.0745972	-3.74474	down
GO:0008017	microtubule binding	molecular_function	7	0.0058271	ENSRNOG00000032410	Mtus2	microtubule associated scaffold protein 2 [Source:RGD Symbol;Acc:1562533]	0.558031	0.820144	0.926162	0.175022	0.462623	0.249959	2.59613	1.37636	up
GO:0097421	liver regeneration	biological_process	8	0.00636219	ENSRNOG00000010935	Cpb2	carboxypeptidase B2 [Source:RGD Symbol;Acc:71035]	0.417813	0.940398	0.194739	0	0	0	5176.5	12.3378	up
GO:0097421	liver regeneration	biological_process	8	0.00636219	ENSRNOG00000014117	Hmox1	heme oxygenase 1 [Source:RGD Symbol;Acc:2806]	31.9406	70.2869	56.3487	14.3785	22.3463	16.8387	2.96053	1.56586	up
GO:0097421	liver regeneration	biological_process	8	0.00636219	ENSRNOG00000025120	Gli1	GLI family zinc finger 1 [Source:RGD Symbol;Acc:621673]	3.07771	4.09095	3.67171	1.56395	1.68971	1.52278	2.26955	1.18241	up
GO:0097421	liver regeneration	biological_process	8	0.00636219	ENSRNOG00000032825	LOC100362027	ribosomal protein L30 [Source:RGD Symbol;Acc:621201]	29.6581	57.4997	72.8836	227.708	210.401	65.5614	0.317751	-1.65403	down
GO:0048018	receptor ligand activity	molecular_function	6	0.00650158	ENSRNOG00000008816	Gpnmb	glycoprotein nmb [Source:RGD Symbol;Acc:71008]	193.456	246.629	303.418	84.0387	88.9556	65.1415	3.12218	1.64255	up
GO:0048018	receptor ligand activity	molecular_function	6	0.00650158	ENSRNOG00000026053	Grem1	gremlin 1, DAN family BMP antagonist [Source:RGD Symbol;Acc:2359]	0.95987	2.57523	2.25854	0.284014	0.14634	0.159551	9.82132	3.29592	up
GO:0048018	receptor ligand activity	molecular_function	6	0.00650158	ENSRNOG00000031162	Ccl24	C-C motif chemokine ligand 24 [Source:RGD Symbol;Acc:1310245]	2.95267	4.5172	2.6358	1.47836	0.899061	1.85835	2.38579	1.25447	up
GO:0045087	innate immune response	biological_process	5	0.00729532	ENSRNOG00000006263	Sh2d1a	SH2 domain containing 1A [Source:RGD Symbol;Acc:1562408]	0.762223	0.828636	1.31519	3.17378	2.3662	3.14758	0.334508	-1.57989	down
GO:0045087	innate immune response	biological_process	5	0.00729532	ENSRNOG00000009342	Fcnb	ficolin B [Source:RGD Symbol;Acc:621222]	6.86838	5.02796	3.18654	12.0512	8.59387	23.5555	0.341237	-1.55115	down
GO:0045087	innate immune response	biological_process	5	0.00729532	ENSRNOG00000011483	S100a9	S100 calcium binding protein A9 [Source:RGD Symbol;Acc:620267]	20.221	25.7548	22.6237	43.4388	35.8205	91.6187	0.401453	-1.3167	down
GO:0045087	innate immune response	biological_process	5	0.00729532	ENSRNOG00000011557	S100a8	S100 calcium binding protein A8 [Source:RGD Symbol;Acc:620265]	6.86219	14.8878	7.83776	25.2298	19.4616	46.9158	0.322986	-1.63046	down
GO:0045087	innate immune response	biological_process	5	0.00729532	ENSRNOG00000013304	Arg1	arginase 1 [Source:RGD Symbol;Acc:2150]	8.35733	12.4054	14.4375	5.09255	6.15658	5.0671	2.15737	1.10928	up
GO:0045087	innate immune response	biological_process	5	0.00729532	ENSRNOG00000013859	Bpifa1	BPI fold containing family A, member 1 [Source:RGD Symbol;Acc:619818]	0.423531	0.205181	928.063	0.160324	0.123339	0.870753	804.469	9.65189	up
GO:0045087	innate immune response	biological_process	5	0.00729532	ENSRNOG00000013973	Lcn2	lipocalin 2 [Source:RGD Symbol;Acc:69408]	399.193	738.611	424.407	107.199	115.007	143.758	4.26876	2.09382	up
GO:0045087	innate immune response	biological_process	5	0.00729532	ENSRNOG00000022067	Tlr5	toll-like receptor 5 [Source:RGD Symbol;Acc:631351]	3.79088	2.48157	3.94515	1.49858	1.60221	1.77419	2.09592	1.06759	up
GO:0045087	innate immune response	biological_process	5	0.00729532	ENSRNOG00000033220	Oas1f	2 ' -5 ' oligoadenylate synthetase 1K [Source:RGD Symbol;Acc:1359279]	5.23307	3.89105	3.42366	9.0953	7.36568	11.0517	0.456073	-1.13266	down
GO:0015125	bile acid transmembrane transporter activity	molecular_function	5	0.00735255	ENSRNOG00000031249	Slco1a2	solute carrier organic anion transporter family, member 1A2 [Source:RGD Symbol;Acc:70985]	8.01298	7.7205	7.23905	17.1036	14.73	19.8891	0.444148	-1.17089	down
GO:0015125	bile acid transmembrane transporter activity	molecular_function	5	0.00735255	ENSRNOG00000036984	Slco1a1	solute carrier organic anion transporter family, member 1a1 [Source:RGD Symbol;Acc:3700]	0.317929	0.628859	0.396718	0.058162	0.110115	0.019966	7.13708	2.83533	up
GO:0071377	cellular response to glucagon stimulus	biological_process	8	0.00735255	ENSRNOG00000013304	Arg1	arginase 1 [Source:RGD Symbol;Acc:2150]	8.35733	12.4054	14.4375	5.09255	6.15658	5.0671	2.15737	1.10928	up
GO:0071377	cellular response to glucagon stimulus	biological_process	8	0.00735255	ENSRNOG00000013704	Cps1	carbamoyl-phosphate synthase 1 [Source:RGD Symbol;Acc:2395]	0.0296366	0.0318274	0.0321218	0	0	0	311.953	8.28518	up
GO:0006880	intracellular sequestering of iron ion	biological_process	5	0.00735255	ENSRNOG00000031506	Ftl1	ferritin light chain 1 [Source:RGD Symbol;Acc:61813]	52.0288	52.2376	40.6289	19.4586	27.1585	22.9462	2.08293	1.05861	up
GO:0006880	intracellular sequestering of iron ion	biological_process	5	0.00735255	ENSRNOG00000033776	LOC100359668	ferritin light chain 2 [Source:RGD Symbol;Acc:2325062]	18.2062	15.2948	13.275	6.91254	7.86972	8.32579	2.02423	1.01737	up
GO:0051315	attachment of mitotic spindle microtubules to kinetochore	biological_process	6	0.00735255	ENSRNOG00000009339	Cenpe	centromere protein E [Source:RGD Symbol;Acc:1307115]	0.788656	1.3332	1.09251	0.574257	0.391805	0.597516	2.05577	1.03968	up
GO:0051315	attachment of mitotic spindle microtubules to kinetochore	biological_process	6	0.00735255	ENSRNOG00000019100	Kif2c	kinesin family member 2C [Source:RGD Symbol;Acc:620239]	1.12797	1.74616	2.14007	0.711131	0.585884	0.897951	2.28441	1.19182	up
GO:0070207	protein homotrimerization	biological_process	9	0.00801592	ENSRNOG00000003298	Cd247	Cd247 molecule [Source:RGD Symbol;Acc:2305]	3.42781	2.27339	3.39083	5.96858	4.58895	7.66207	0.499025	-1.00282	down
GO:0070207	protein homotrimerization	biological_process	9	0.00801592	ENSRNOG00000013304	Arg1	arginase 1 [Source:RGD Symbol;Acc:2150]	8.35733	12.4054	14.4375	5.09255	6.15658	5.0671	2.15737	1.10928	up
GO:0070207	protein homotrimerization	biological_process	9	0.00801592	ENSRNOG00000013973	Lcn2	lipocalin 2 [Source:RGD Symbol;Acc:69408]	399.193	738.611	424.407	107.199	115.007	143.758	4.26876	2.09382	up
GO:0034612	response to tumor necrosis factor	biological_process	7	0.00801592	ENSRNOG00000000768	Ubd	ubiquitin D [Source:RGD Symbol;Acc:69418]	0.852352	1.11817	10.1361	0.399383	0.741507	0.752221	6.39509	2.67697	up
GO:0034612	response to tumor necrosis factor	biological_process	7	0.00801592	ENSRNOG00000010906	Ccl5	C-C motif chemokine ligand 5 [Source:RGD Symbol;Acc:69069]	48.3284	41.7605	33.5398	89.039	63.5136	135.101	0.429784	-1.21832	down
GO:0034612	response to tumor necrosis factor	biological_process	7	0.00801592	ENSRNOG00000053272	Chi3l1	chitinase 3 like 1 [Source:RGD Symbol;Acc:620874]	78.1203	93.0092	101.602	41.6996	35.3419	56.541	2.04167	1.02975	up
GO:0010951	negative regulation of endopeptidase activity	biological_process	11	0.00829298	ENSRNOG00000002640	Serpinb5	serpin family B member 5 [Source:RGD Symbol;Acc:69342]	0	0	0.922211	0	0	0	3074.04	11.5859	up
GO:0010951	negative regulation of endopeptidase activity	biological_process	11	0.00829298	ENSRNOG00000002831	Wfikkn2	WAP, follistatin/kazal, immunoglobulin, kunitz and netrin domain containing 2 [Source:RGD Symbol;Acc:1305361]	0.67908	0.636644	0.827013	0.12076	0.21243	0.113778	4.79394	2.26121	up
GO:0010951	negative regulation of endopeptidase activity	biological_process	11	0.00829298	ENSRNOG00000015461	Serpine2	serpin family E member 2 [Source:RGD Symbol;Acc:3748]	21.8704	32.5856	37.2124	17.0684	13.4899	15.117	2.00695	1.00501	up
GO:0010951	negative regulation of endopeptidase activity	biological_process	11	0.00829298	ENSRNOG00000017381	Itih4	inter-alpha-trypsin inhibitor heavy chain 4 [Source:RGD Symbol;Acc:70881]	1.36066	3.25426	1.61958	0.428099	0.510321	0.295756	5.05155	2.33673	up
GO:0010951	negative regulation of endopeptidase activity	biological_process	11	0.00829298	ENSRNOG00000024330	Ngp	neutrophilic granule protein [Source:RGD Symbol;Acc:1308994]	0.494763	0.708482	0.378138	1.97936	1.52555	3.28227	0.232996	-2.10162	down
GO:0010951	negative regulation of endopeptidase activity	biological_process	11	0.00829298	ENSRNOG00000025332	Cd109	CD109 molecule [Source:RGD Symbol;Acc:1311287]	0.664014	1.9128	1.14092	0.472451	0.345737	0.370172	3.12846	1.64545	up
GO:0005903	brush border	cellular_component	5	0.00834453	ENSRNOG00000004177	Myo1a	myosin IA [Source:RGD Symbol;Acc:3135]	0.621574	0.513884	0.299639	1.36739	1.14678	1.28165	0.378073	-1.40326	down
GO:0005903	brush border	cellular_component	5	0.00834453	ENSRNOG00000011598	Slc15a1	solute carrier family 15 member 1 [Source:RGD Symbol;Acc:621736]	0.061492	0.060826	0.078949	0	0	0	670.89	9.38993	up
GO:0005903	brush border	cellular_component	5	0.00834453	ENSRNOG00000015408	Vil1	villin 1 [Source:RGD Symbol;Acc:1307048]	0.852	0.23051	0.408527	1.89595	1.63924	3.09661	0.224832	-2.15308	down
GO:0005903	brush border	cellular_component	5	0.00834453	ENSRNOG00000051854	Enpep	glutamyl aminopeptidase [Source:RGD Symbol;Acc:621228]	18.815	14.6776	10.9005	33.2081	30.5951	30.1322	0.472593	-1.08133	down
GO:0008219	cell death	biological_process	4	0.00884433	ENSRNOG00000005561	Brinp1	BMP/retinoic acid inducible neural specific 1 [Source:RGD Symbol;Acc:708519]	0.288316	0.238766	0.291186	0.049783	0.091602	0.08736	3.57721	1.83883	up
GO:0008219	cell death	biological_process	4	0.00884433	ENSRNOG00000014117	Hmox1	heme oxygenase 1 [Source:RGD Symbol;Acc:2806]	31.9406	70.2869	56.3487	14.3785	22.3463	16.8387	2.96053	1.56586	up
GO:0008219	cell death	biological_process	4	0.00884433	ENSRNOG00000030530	Gzmm	granzyme M [Source:RGD Symbol;Acc:620022]	15.5155	10.2956	10.456	27.0434	19.0509	36.6771	0.43816	-1.19047	down
GO:0005902	microvillus	cellular_component	7	0.00889642	ENSRNOG00000004177	Myo1a	myosin IA [Source:RGD Symbol;Acc:3135]	0.621574	0.513884	0.299639	1.36739	1.14678	1.28165	0.378073	-1.40326	down
GO:0005902	microvillus	cellular_component	7	0.00889642	ENSRNOG00000013641	Myo7a	myosin VIIA [Source:RGD Symbol;Acc:628830]	1.16161	0.900417	1.40572	0.61878	0.548688	0.42358	2.17954	1.12402	up
GO:0005902	microvillus	cellular_component	7	0.00889642	ENSRNOG00000013859	Bpifa1	BPI fold containing family A, member 1 [Source:RGD Symbol;Acc:619818]	0.423531	0.205181	928.063	0.160324	0.123339	0.870753	804.469	9.65189	up
GO:0005902	microvillus	cellular_component	7	0.00889642	ENSRNOG00000015408	Vil1	villin 1 [Source:RGD Symbol;Acc:1307048]	0.852	0.23051	0.408527	1.89595	1.63924	3.09661	0.224832	-2.15308	down
GO:0071625	vocalization behavior	biological_process	4	0.00910132	ENSRNOG00000005561	Brinp1	BMP/retinoic acid inducible neural specific 1 [Source:RGD Symbol;Acc:708519]	0.288316	0.238766	0.291186	0.049783	0.091602	0.08736	3.57721	1.83883	up
GO:0071625	vocalization behavior	biological_process	4	0.00910132	ENSRNOG00000050220	Nrxn1	neurexin 1 [Source:RGD Symbol;Acc:628659]	0.558072	0.451492	0.290124	1.63738	1.09146	0.868123	0.36133	-1.46861	down
GO:0005513	detection of calcium ion	biological_process	6	0.00910132	ENSRNOG00000006426	Syt1	synaptotagmin 1 [Source:RGD Symbol;Acc:3803]	0.535581	0.254328	0.726439	1.20032	1.83951	1.33849	0.346332	-1.52977	down
GO:0005513	detection of calcium ion	biological_process	6	0.00910132	ENSRNOG00000017060	Ryr2	ryanodine receptor 2 [Source:RGD Symbol;Acc:620314]	0.285075	0.300051	1.47817	0.173643	0.049516	0.188027	5.01792	2.32709	up
GO:0048711	positive regulation of astrocyte differentiation	biological_process	12	0.00910132	ENSRNOG00000007002	Lif	LIF, interleukin 6 family cytokine [Source:RGD Symbol;Acc:620865]	0.880568	1.01865	1.04408	0.472627	0.322036	0.294568	2.70218	1.43413	up
GO:0048711	positive regulation of astrocyte differentiation	biological_process	12	0.00910132	ENSRNOG00000015461	Serpine2	serpin family E member 2 [Source:RGD Symbol;Acc:3748]	21.8704	32.5856	37.2124	17.0684	13.4899	15.117	2.00695	1.00501	up
GO:0035457	cellular response to interferon-alpha	biological_process	8	0.00910132	ENSRNOG00000019050	Ifit1	interferon-induced protein with tetratricopeptide repeats 1 [Source:RGD Symbol;Acc:620599]	10.0484	9.65548	5.40845	21.5586	30.666	25.6832	0.322334	-1.63337	down
GO:0035457	cellular response to interferon-alpha	biological_process	8	0.00910132	ENSRNOG00000022839	Ifit3	interferon-induced protein with tetratricopeptide repeats 3 [Source:RGD Symbol;Acc:1359681]	6.58621	5.63265	5.42336	15.6292	10.5641	23.771	0.353096	-1.50187	down
GO:0008514	organic anion transmembrane transporter activity	molecular_function	7	0.00910132	ENSRNOG00000031249	Slco1a2	solute carrier organic anion transporter family, member 1A2 [Source:RGD Symbol;Acc:70985]	8.01298	7.7205	7.23905	17.1036	14.73	19.8891	0.444148	-1.17089	down
GO:0008514	organic anion transmembrane transporter activity	molecular_function	7	0.00910132	ENSRNOG00000036984	Slco1a1	solute carrier organic anion transporter family, member 1a1 [Source:RGD Symbol;Acc:3700]	0.317929	0.628859	0.396718	0.058162	0.110115	0.019966	7.13708	2.83533	up
GO:0043922	negative regulation by host of viral transcription	biological_process	10	0.00910132	ENSRNOG00000009118	Pou2f3	POU class 2 homeobox 3 [Source:RGD Symbol;Acc:621691]	0.80936	0.183727	0.257766	2.15107	1.10798	1.91974	0.241534	-2.0497	down
GO:0043922	negative regulation by host of viral transcription	biological_process	10	0.00910132	ENSRNOG00000010906	Ccl5	C-C motif chemokine ligand 5 [Source:RGD Symbol;Acc:69069]	48.3284	41.7605	33.5398	89.039	63.5136	135.101	0.429784	-1.21832	down
GO:1902043	positive regulation of extrinsic apoptotic signaling pathway via death domain receptors	biological_process	11	0.00910132	ENSRNOG00000015445	Mal	mal, T-cell differentiation protein [Source:RGD Symbol;Acc:3037]	4.28993	6.10298	7.71911	8.68788	11.4303	17.2031	0.485301	-1.04305	down
GO:1902043	positive regulation of extrinsic apoptotic signaling pathway via death domain receptors	biological_process	11	0.00910132	ENSRNOG00000017783	Sfrp1	secreted frizzled-related protein 1 [Source:RGD Symbol;Acc:621074]	1.68002	2.38548	4.44256	1.64961	1.21244	0.920778	2.24913	1.16937	up
GO:0098978	glutamatergic synapse	cellular_component	4	0.00942263	ENSRNOG00000003741	Nptx1	neuronal pentraxin 1 [Source:RGD Symbol;Acc:628894]	0.09837	0.157223	0.175297	0.363175	0.746714	0.328186	0.29963	-1.73875	down
GO:0098978	glutamatergic synapse	cellular_component	4	0.00942263	ENSRNOG00000006093	LRRTM1	leucine rich repeat transmembrane neuronal 1 [Source:RGD Symbol;Acc:1585921]	0.125443	0.154939	0.134368	0	0.01746	0	23.7543	4.57012	up
GO:0098978	glutamatergic synapse	cellular_component	4	0.00942263	ENSRNOG00000006426	Syt1	synaptotagmin 1 [Source:RGD Symbol;Acc:3803]	0.535581	0.254328	0.726439	1.20032	1.83951	1.33849	0.346332	-1.52977	down
GO:0098978	glutamatergic synapse	cellular_component	4	0.00942263	ENSRNOG00000007509	Slc1a6	solute carrier family 1 member 6 [Source:RGD Symbol;Acc:620340]	0.044448	0.022178	1.5478	0	0	0	5381.42	12.3938	up
GO:0098978	glutamatergic synapse	cellular_component	4	0.00942263	ENSRNOG00000013481	Cdh11	cadherin 11 [Source:RGD Symbol;Acc:619742]	13.9402	23.495	20.613	7.8593	11.181	7.5212	2.18543	1.12791	up
GO:0098978	glutamatergic synapse	cellular_component	4	0.00942263	ENSRNOG00000014006	Neto1	neuropilin and tolloid like 1 [Source:RGD Symbol;Acc:1566269]	0.083617	0.086844	0.08791	0	0	0	861.237	9.75027	up
GO:0098978	glutamatergic synapse	cellular_component	4	0.00942263	ENSRNOG00000014170	Dbn1	drebrin 1 [Source:RGD Symbol;Acc:70885]	10.9214	12.9572	10.2577	6.1132	4.51819	6.14413	2.03489	1.02495	up
GO:0098978	glutamatergic synapse	cellular_component	4	0.00942263	ENSRNOG00000017606	P2rx1	purinergic receptor P2X 1 [Source:RGD Symbol;Acc:3240]	7.18568	9.04786	9.01957	19.2409	13.9678	19.8251	0.476169	-1.07045	down
GO:0098978	glutamatergic synapse	cellular_component	4	0.00942263	ENSRNOG00000020833	Cspg5	chondroitin sulfate proteoglycan 5 [Source:RGD Symbol;Acc:2431]	1.01362	1.31543	1.50196	0.355355	0.368381	0.655816	2.77699	1.47352	up
GO:0098978	glutamatergic synapse	cellular_component	4	0.00942263	ENSRNOG00000022635	Dlg2	discs large MAGUK scaffold protein 2 [Source:RGD Symbol;Acc:619895]	0.884341	1.52643	2.40362	0.647262	0.40045	0.624041	2.87985	1.52599	up
GO:0098978	glutamatergic synapse	cellular_component	4	0.00942263	ENSRNOG00000026704	Drp2	dystrophin related protein 2 [Source:RGD Symbol;Acc:621750]	4.13756	3.47252	6.62276	2.85545	2.30663	1.48257	2.142	1.09896	up
GO:0098978	glutamatergic synapse	cellular_component	4	0.00942263	ENSRNOG00000028404	Ppp1r1b	protein phosphatase 1, regulatory (inhibitor) subunit 1B [Source:RGD Symbol;Acc:621859]	22.4231	7.67647	15.2862	32.2533	35.5582	36.4644	0.435248	-1.20009	down
GO:0007059	chromosome segregation	biological_process	4	0.0094716	ENSRNOG00000004487	Nek2	NIMA (never in mitosis gene a)-related kinase 2-like 1 [Source:RGD Symbol;Acc:1582899]	1.56838	1.81988	3.87627	0.970926	0.827985	1.08667	2.51752	1.33201	up
GO:0007059	chromosome segregation	biological_process	4	0.0094716	ENSRNOG00000009334	Knstrn	kinetochore-localized astrin/SPAG5 binding protein [Source:RGD Symbol;Acc:1303240]	2.00772	2.65504	3.12539	0.916384	0.953023	0.774118	2.94612	1.55882	up
GO:0007059	chromosome segregation	biological_process	4	0.0094716	ENSRNOG00000009339	Cenpe	centromere protein E [Source:RGD Symbol;Acc:1307115]	0.788656	1.3332	1.09251	0.574257	0.391805	0.597516	2.05577	1.03968	up
GO:0007059	chromosome segregation	biological_process	4	0.0094716	ENSRNOG00000029055	Ttk	Ttk protein kinase [Source:RGD Symbol;Acc:1305558]	0.567316	1.43363	1.35383	0.510706	0.373299	0.471024	2.4758	1.30789	up
GO:0099055	integral component of postsynaptic membrane	cellular_component	8	0.0094716	ENSRNOG00000006093	LRRTM1	leucine rich repeat transmembrane neuronal 1 [Source:RGD Symbol;Acc:1585921]	0.125443	0.154939	0.134368	0	0.01746	0	23.7543	4.57012	up
GO:0099055	integral component of postsynaptic membrane	cellular_component	8	0.0094716	ENSRNOG00000017606	P2rx1	purinergic receptor P2X 1 [Source:RGD Symbol;Acc:3240]	7.18568	9.04786	9.01957	19.2409	13.9678	19.8251	0.476169	-1.07045	down
GO:0099055	integral component of postsynaptic membrane	cellular_component	8	0.0094716	ENSRNOG00000020833	Cspg5	chondroitin sulfate proteoglycan 5 [Source:RGD Symbol;Acc:2431]	1.01362	1.31543	1.50196	0.355355	0.368381	0.655816	2.77699	1.47352	up
GO:0099055	integral component of postsynaptic membrane	cellular_component	8	0.0094716	ENSRNOG00000033837	Cdh9	cadherin 9 [Source:RGD Symbol;Acc:1308343]	0	0	0	0.210953	0.147315	0.112743	0.000636928	-10.6166	down
GO:0000776	kinetochore	cellular_component	4	0.00948511	ENSRNOG00000004487	Nek2	NIMA (never in mitosis gene a)-related kinase 2-like 1 [Source:RGD Symbol;Acc:1582899]	1.56838	1.81988	3.87627	0.970926	0.827985	1.08667	2.51752	1.33201	up
GO:0000776	kinetochore	cellular_component	4	0.00948511	ENSRNOG00000009334	Knstrn	kinetochore-localized astrin/SPAG5 binding protein [Source:RGD Symbol;Acc:1303240]	2.00772	2.65504	3.12539	0.916384	0.953023	0.774118	2.94612	1.55882	up
GO:0000776	kinetochore	cellular_component	4	0.00948511	ENSRNOG00000009339	Cenpe	centromere protein E [Source:RGD Symbol;Acc:1307115]	0.788656	1.3332	1.09251	0.574257	0.391805	0.597516	2.05577	1.03968	up
GO:0000776	kinetochore	cellular_component	4	0.00948511	ENSRNOG00000019100	Kif2c	kinesin family member 2C [Source:RGD Symbol;Acc:620239]	1.12797	1.74616	2.14007	0.711131	0.585884	0.897951	2.28441	1.19182	up
GO:0000776	kinetochore	cellular_component	4	0.00948511	ENSRNOG00000029055	Ttk	Ttk protein kinase [Source:RGD Symbol;Acc:1305558]	0.567316	1.43363	1.35383	0.510706	0.373299	0.471024	2.4758	1.30789	up
GO:0031091	platelet alpha granule	cellular_component	9	0.0110158	ENSRNOG00000010529	Thbs2	thrombospondin 2 [Source:RGD Symbol;Acc:1310979]	2.57939	6.01878	6.82916	1.12399	1.12034	1.18604	4.49727	2.16905	up
GO:0031091	platelet alpha granule	cellular_component	9	0.0110158	ENSRNOG00000015461	Serpine2	serpin family E member 2 [Source:RGD Symbol;Acc:3748]	21.8704	32.5856	37.2124	17.0684	13.4899	15.117	2.00695	1.00501	up
GO:0002523	leukocyte migration involved in inflammatory response	biological_process	5	0.0110158	ENSRNOG00000011483	S100a9	S100 calcium binding protein A9 [Source:RGD Symbol;Acc:620267]	20.221	25.7548	22.6237	43.4388	35.8205	91.6187	0.401453	-1.3167	down
GO:0002523	leukocyte migration involved in inflammatory response	biological_process	5	0.0110158	ENSRNOG00000011557	S100a8	S100 calcium binding protein A8 [Source:RGD Symbol;Acc:620265]	6.86219	14.8878	7.83776	25.2298	19.4616	46.9158	0.322986	-1.63046	down
GO:0008271	secondary active sulfate transmembrane transporter activity	molecular_function	9	0.0110158	ENSRNOG00000030537	Slc26a11	solute carrier family 26 member 11 [Source:RGD Symbol;Acc:1306178]	6.84628	6.70089	8.1726	4.02064	3.4052	3.16109	2.05157	1.03673	up
GO:0008271	secondary active sulfate transmembrane transporter activity	molecular_function	9	0.0110158	ENSRNOG00000058692	Slc26a4	solute carrier family 26 member 4 [Source:RGD Symbol;Acc:3293]	4.03381	8.98354	10.6969	1.03707	0.715431	0.934049	8.82701	3.14192	up
GO:0051310	metaphase plate congression	biological_process	8	0.0110158	ENSRNOG00000009339	Cenpe	centromere protein E [Source:RGD Symbol;Acc:1307115]	0.788656	1.3332	1.09251	0.574257	0.391805	0.597516	2.05577	1.03968	up
GO:0051310	metaphase plate congression	biological_process	8	0.0110158	ENSRNOG00000019100	Kif2c	kinesin family member 2C [Source:RGD Symbol;Acc:620239]	1.12797	1.74616	2.14007	0.711131	0.585884	0.897951	2.28441	1.19182	up
GO:0042119	neutrophil activation	biological_process	8	0.0110158	ENSRNOG00000010906	Ccl5	C-C motif chemokine ligand 5 [Source:RGD Symbol;Acc:69069]	48.3284	41.7605	33.5398	89.039	63.5136	135.101	0.429784	-1.21832	down
GO:0042119	neutrophil activation	biological_process	8	0.0110158	ENSRNOG00000054218	Il18rap	interleukin 18 receptor accessory protein [Source:RGD Symbol;Acc:727867]	0.952382	0.874742	0.928804	2.62494	1.36523	2.00221	0.459906	-1.12059	down
GO:0017147	Wnt-protein binding	molecular_function	5	0.0116215	ENSRNOG00000004578	Cthrc1	collagen triple helix repeat containing 1 [Source:RGD Symbol;Acc:628801]	3.10308	5.29985	11.6251	2.15384	2.19971	2.10492	3.10105	1.63276	up
GO:0017147	Wnt-protein binding	molecular_function	5	0.0116215	ENSRNOG00000007765	Frzb	frizzled-related protein [Source:RGD Symbol;Acc:1311315]	3.17213	4.68488	12.4008	2.30154	1.72858	2.68979	3.01459	1.59196	up
GO:0017147	Wnt-protein binding	molecular_function	5	0.0116215	ENSRNOG00000017783	Sfrp1	secreted frizzled-related protein 1 [Source:RGD Symbol;Acc:621074]	1.68002	2.38548	4.44256	1.64961	1.21244	0.920778	2.24913	1.16937	up
GO:0015629	actin cytoskeleton	cellular_component	7	0.0116395	ENSRNOG00000009951	Aif1l	allograft inflammatory factor 1-like [Source:RGD Symbol;Acc:1305081]	1.94247	4.30351	3.17287	1.2613	0.881366	0.925637	3.06973	1.61811	up
GO:0015629	actin cytoskeleton	cellular_component	7	0.0116395	ENSRNOG00000014170	Dbn1	drebrin 1 [Source:RGD Symbol;Acc:70885]	10.9214	12.9572	10.2577	6.1132	4.51819	6.14413	2.03489	1.02495	up
GO:0015629	actin cytoskeleton	cellular_component	7	0.0116395	ENSRNOG00000017786	Acta1	actin, alpha 1, skeletal muscle [Source:RGD Symbol;Acc:2025]	2.06127	3.95623	4.72239	0.202559	1.39766	0.697384	4.67439	2.22478	up
GO:0015629	actin cytoskeleton	cellular_component	7	0.0116395	ENSRNOG00000025198	Gas2l3	growth arrest-specific 2 like 3 [Source:RGD Symbol;Acc:1594151]	0.699026	1.3698	1.34355	0.469232	0.403743	0.326446	2.84503	1.50844	up
GO:0015629	actin cytoskeleton	cellular_component	7	0.0116395	ENSRNOG00000027542	LOC100302465	hypothetical LOC100302465 [Source:RGD Symbol;Acc:2311471]	0.0181206	0	0.0289175	0.163897	0.206534	0.260131	0.0745972	-3.74474	down
GO:0015629	actin cytoskeleton	cellular_component	7	0.0116395	ENSRNOG00000029079	Hspb7	heat shock protein family B (small) member 7 [Source:RGD Symbol;Acc:62021]	6.47997	7.14978	12.1118	2.57792	3.29152	3.95223	2.62089	1.39006	up
GO:0015629	actin cytoskeleton	cellular_component	7	0.0116395	ENSRNOG00000033658	Kntc1	kinetochore associated 1 [Source:RGD Symbol;Acc:1307905]	0.530284	1.09944	1.28499	0.561977	0.273268	0.368844	2.42068	1.27541	up
GO:0016324	apical plasma membrane	cellular_component	5	0.0122002	ENSRNOG00000004177	Myo1a	myosin IA [Source:RGD Symbol;Acc:3135]	0.621574	0.513884	0.299639	1.36739	1.14678	1.28165	0.378073	-1.40326	down
GO:0016324	apical plasma membrane	cellular_component	5	0.0122002	ENSRNOG00000005268	Gnat3	G protein subunit alpha transducin 3 [Source:RGD Symbol;Acc:727817]	1.25921	0.481596	0.306878	3.70113	2.49755	4.15072	0.197855	-2.33748	down
GO:0016324	apical plasma membrane	cellular_component	5	0.0122002	ENSRNOG00000013641	Myo7a	myosin VIIA [Source:RGD Symbol;Acc:628830]	1.16161	0.900417	1.40572	0.61878	0.548688	0.42358	2.17954	1.12402	up
GO:0016324	apical plasma membrane	cellular_component	5	0.0122002	ENSRNOG00000015445	Mal	mal, T-cell differentiation protein [Source:RGD Symbol;Acc:3037]	4.28993	6.10298	7.71911	8.68788	11.4303	17.2031	0.485301	-1.04305	down
GO:0016324	apical plasma membrane	cellular_component	5	0.0122002	ENSRNOG00000017775	Slc5a1	solute carrier family 5 member 1 [Source:RGD Symbol;Acc:3713]	5.02389	3.24643	3.5349	9.53507	10.2527	6.94576	0.441589	-1.17922	down
GO:0016324	apical plasma membrane	cellular_component	5	0.0122002	ENSRNOG00000020837	Cd300lg	Cd300 molecule-like family member G [Source:RGD Symbol;Acc:1584376]	1.60214	0.651749	3.22129	0.235774	0.385302	0.551614	4.6689	2.22308	up
GO:0016324	apical plasma membrane	cellular_component	5	0.0122002	ENSRNOG00000032871	Mlc1	modulator of VRAC current 1 [Source:RGD Symbol;Acc:1308552]	2.77574	1.49853	1.20774	4.12707	7.92023	3.89051	0.343963	-1.53968	down
GO:0016324	apical plasma membrane	cellular_component	5	0.0122002	ENSRNOG00000051854	Enpep	glutamyl aminopeptidase [Source:RGD Symbol;Acc:621228]	18.815	14.6776	10.9005	33.2081	30.5951	30.1322	0.472593	-1.08133	down
GO:0016324	apical plasma membrane	cellular_component	5	0.0122002	ENSRNOG00000058692	Slc26a4	solute carrier family 26 member 4 [Source:RGD Symbol;Acc:3293]	4.03381	8.98354	10.6969	1.03707	0.715431	0.934049	8.82701	3.14192	up
GO:0045211	postsynaptic membrane	cellular_component	5	0.0123751	ENSRNOG00000006093	LRRTM1	leucine rich repeat transmembrane neuronal 1 [Source:RGD Symbol;Acc:1585921]	0.125443	0.154939	0.134368	0	0.01746	0	23.7543	4.57012	up
GO:0045211	postsynaptic membrane	cellular_component	5	0.0123751	ENSRNOG00000014170	Dbn1	drebrin 1 [Source:RGD Symbol;Acc:70885]	10.9214	12.9572	10.2577	6.1132	4.51819	6.14413	2.03489	1.02495	up
GO:0045211	postsynaptic membrane	cellular_component	5	0.0123751	ENSRNOG00000017606	P2rx1	purinergic receptor P2X 1 [Source:RGD Symbol;Acc:3240]	7.18568	9.04786	9.01957	19.2409	13.9678	19.8251	0.476169	-1.07045	down
GO:0045211	postsynaptic membrane	cellular_component	5	0.0123751	ENSRNOG00000022635	Dlg2	discs large MAGUK scaffold protein 2 [Source:RGD Symbol;Acc:619895]	0.884341	1.52643	2.40362	0.647262	0.40045	0.624041	2.87985	1.52599	up
GO:0045211	postsynaptic membrane	cellular_component	5	0.0123751	ENSRNOG00000026238	Insyn1	inhibitory synaptic factor 1 [Source:RGD Symbol;Acc:1562618]	2.6079	3.72146	2.943	1.30836	1.7218	0.825193	2.40507	1.26608	up
GO:0045211	postsynaptic membrane	cellular_component	5	0.0123751	ENSRNOG00000026704	Drp2	dystrophin related protein 2 [Source:RGD Symbol;Acc:621750]	4.13756	3.47252	6.62276	2.85545	2.30663	1.48257	2.142	1.09896	up
GO:0045211	postsynaptic membrane	cellular_component	5	0.0123751	ENSRNOG00000031536	Syndig1	synapse differentiation inducing 1 [Source:RGD Symbol;Acc:1310753]	3.11116	2.77016	1.96867	5.58928	6.40608	5.16542	0.457438	-1.12835	down
GO:0050679	positive regulation of epithelial cell proliferation	biological_process	8	0.0127093	ENSRNOG00000010905	Dlx5	distal-less homeobox 5 [Source:RGD Symbol;Acc:2506]	0.333893	0.067122	0.257194	0	0	0	2194.03	11.0994	up
GO:0050679	positive regulation of epithelial cell proliferation	biological_process	8	0.0127093	ENSRNOG00000010906	Ccl5	C-C motif chemokine ligand 5 [Source:RGD Symbol;Acc:69069]	48.3284	41.7605	33.5398	89.039	63.5136	135.101	0.429784	-1.21832	down
GO:0050679	positive regulation of epithelial cell proliferation	biological_process	8	0.0127093	ENSRNOG00000017783	Sfrp1	secreted frizzled-related protein 1 [Source:RGD Symbol;Acc:621074]	1.68002	2.38548	4.44256	1.64961	1.21244	0.920778	2.24913	1.16937	up
GO:0050679	positive regulation of epithelial cell proliferation	biological_process	8	0.0127093	ENSRNOG00000023683	Nog	noggin [Source:RGD Symbol;Acc:3183]	1.3224	2.21724	1.19676	0.464518	0.534484	0.368221	3.46425	1.79254	up
GO:0030308	negative regulation of cell growth	biological_process	7	0.0129703	ENSRNOG00000007765	Frzb	frizzled-related protein [Source:RGD Symbol;Acc:1311315]	3.17213	4.68488	12.4008	2.30154	1.72858	2.68979	3.01459	1.59196	up
GO:0030308	negative regulation of cell growth	biological_process	7	0.0129703	ENSRNOG00000008176	Nppa	natriuretic peptide A [Source:RGD Symbol;Acc:3193]	0	0	4.77912	0	0	0	15930.4	13.9595	up
GO:0030308	negative regulation of cell growth	biological_process	7	0.0129703	ENSRNOG00000015461	Serpine2	serpin family E member 2 [Source:RGD Symbol;Acc:3748]	21.8704	32.5856	37.2124	17.0684	13.4899	15.117	2.00695	1.00501	up
GO:0030308	negative regulation of cell growth	biological_process	7	0.0129703	ENSRNOG00000017783	Sfrp1	secreted frizzled-related protein 1 [Source:RGD Symbol;Acc:621074]	1.68002	2.38548	4.44256	1.64961	1.21244	0.920778	2.24913	1.16937	up
GO:0030308	negative regulation of cell growth	biological_process	7	0.0129703	ENSRNOG00000026053	Grem1	gremlin 1, DAN family BMP antagonist [Source:RGD Symbol;Acc:2359]	0.95987	2.57523	2.25854	0.284014	0.14634	0.159551	9.82132	3.29592	up
GO:0060071	Wnt signaling pathway, planar cell polarity pathway	biological_process	9	0.0130907	ENSRNOG00000004578	Cthrc1	collagen triple helix repeat containing 1 [Source:RGD Symbol;Acc:628801]	3.10308	5.29985	11.6251	2.15384	2.19971	2.10492	3.10105	1.63276	up
GO:0060071	Wnt signaling pathway, planar cell polarity pathway	biological_process	9	0.0130907	ENSRNOG00000017783	Sfrp1	secreted frizzled-related protein 1 [Source:RGD Symbol;Acc:621074]	1.68002	2.38548	4.44256	1.64961	1.21244	0.920778	2.24913	1.16937	up
GO:0050892	intestinal absorption	biological_process	6	0.0130907	ENSRNOG00000017775	Slc5a1	solute carrier family 5 member 1 [Source:RGD Symbol;Acc:3713]	5.02389	3.24643	3.5349	9.53507	10.2527	6.94576	0.441589	-1.17922	down
GO:0050892	intestinal absorption	biological_process	6	0.0130907	ENSRNOG00000031249	Slco1a2	solute carrier organic anion transporter family, member 1A2 [Source:RGD Symbol;Acc:70985]	8.01298	7.7205	7.23905	17.1036	14.73	19.8891	0.444148	-1.17089	down
GO:0014075	response to amine	biological_process	7	0.0130907	ENSRNOG00000013304	Arg1	arginase 1 [Source:RGD Symbol;Acc:2150]	8.35733	12.4054	14.4375	5.09255	6.15658	5.0671	2.15737	1.10928	up
GO:0014075	response to amine	biological_process	7	0.0130907	ENSRNOG00000013704	Cps1	carbamoyl-phosphate synthase 1 [Source:RGD Symbol;Acc:2395]	0.0296366	0.0318274	0.0321218	0	0	0	311.953	8.28518	up
GO:0071481	cellular response to X-ray	biological_process	8	0.0130907	ENSRNOG00000014170	Dbn1	drebrin 1 [Source:RGD Symbol;Acc:70885]	10.9214	12.9572	10.2577	6.1132	4.51819	6.14413	2.03489	1.02495	up
GO:0071481	cellular response to X-ray	biological_process	8	0.0130907	ENSRNOG00000017783	Sfrp1	secreted frizzled-related protein 1 [Source:RGD Symbol;Acc:621074]	1.68002	2.38548	4.44256	1.64961	1.21244	0.920778	2.24913	1.16937	up
GO:1902358	sulfate transmembrane transport	biological_process	10	0.0130907	ENSRNOG00000030537	Slc26a11	solute carrier family 26 member 11 [Source:RGD Symbol;Acc:1306178]	6.84628	6.70089	8.1726	4.02064	3.4052	3.16109	2.05157	1.03673	up
GO:1902358	sulfate transmembrane transport	biological_process	10	0.0130907	ENSRNOG00000058692	Slc26a4	solute carrier family 26 member 4 [Source:RGD Symbol;Acc:3293]	4.03381	8.98354	10.6969	1.03707	0.715431	0.934049	8.82701	3.14192	up
GO:0015711	organic anion transport	biological_process	8	0.0130907	ENSRNOG00000031249	Slco1a2	solute carrier organic anion transporter family, member 1A2 [Source:RGD Symbol;Acc:70985]	8.01298	7.7205	7.23905	17.1036	14.73	19.8891	0.444148	-1.17089	down
GO:0015711	organic anion transport	biological_process	8	0.0130907	ENSRNOG00000036984	Slco1a1	solute carrier organic anion transporter family, member 1a1 [Source:RGD Symbol;Acc:3700]	0.317929	0.628859	0.396718	0.058162	0.110115	0.019966	7.13708	2.83533	up
GO:0015116	sulfate transmembrane transporter activity	molecular_function	8	0.0130907	ENSRNOG00000030537	Slc26a11	solute carrier family 26 member 11 [Source:RGD Symbol;Acc:1306178]	6.84628	6.70089	8.1726	4.02064	3.4052	3.16109	2.05157	1.03673	up
GO:0015116	sulfate transmembrane transporter activity	molecular_function	8	0.0130907	ENSRNOG00000058692	Slc26a4	solute carrier family 26 member 4 [Source:RGD Symbol;Acc:3293]	4.03381	8.98354	10.6969	1.03707	0.715431	0.934049	8.82701	3.14192	up
GO:0045744	negative regulation of G protein-coupled receptor signaling pathway	biological_process	9	0.0130907	ENSRNOG00000003888	Rgs13	regulator of G-protein signaling 13 [Source:RGD Symbol;Acc:1562103]	0.928761	0.388512	1.24146	2.64531	2.41241	3.42196	0.301749	-1.72858	down
GO:0045744	negative regulation of G protein-coupled receptor signaling pathway	biological_process	9	0.0130907	ENSRNOG00000010906	Ccl5	C-C motif chemokine ligand 5 [Source:RGD Symbol;Acc:69069]	48.3284	41.7605	33.5398	89.039	63.5136	135.101	0.429784	-1.21832	down
GO:0060340	positive regulation of type I interferon-mediated signaling pathway	biological_process	10	0.0130907	ENSRNOG00000017414	Irf7	interferon regulatory factor 7 [Source:RGD Symbol;Acc:1307828]	50.0909	39.3499	31.835	103.562	77.9961	166.957	0.347979	-1.52293	down
GO:0060340	positive regulation of type I interferon-mediated signaling pathway	biological_process	10	0.0130907	ENSRNOG00000030187	Mmp12	matrix metallopeptidase 12 [Source:RGD Symbol;Acc:620195]	0.8267	3.66773	18.8195	0.329763	0.456892	0.690975	15.7779	3.97983	up
GO:0071773	cellular response to BMP stimulus	biological_process	8	0.0137208	ENSRNOG00000010905	Dlx5	distal-less homeobox 5 [Source:RGD Symbol;Acc:2506]	0.333893	0.067122	0.257194	0	0	0	2194.03	11.0994	up
GO:0071773	cellular response to BMP stimulus	biological_process	8	0.0137208	ENSRNOG00000017783	Sfrp1	secreted frizzled-related protein 1 [Source:RGD Symbol;Acc:621074]	1.68002	2.38548	4.44256	1.64961	1.21244	0.920778	2.24913	1.16937	up
GO:0071773	cellular response to BMP stimulus	biological_process	8	0.0137208	ENSRNOG00000023683	Nog	noggin [Source:RGD Symbol;Acc:3183]	1.3224	2.21724	1.19676	0.464518	0.534484	0.368221	3.46425	1.79254	up
GO:0042130	negative regulation of T cell proliferation	biological_process	11	0.0137208	ENSRNOG00000008816	Gpnmb	glycoprotein nmb [Source:RGD Symbol;Acc:71008]	193.456	246.629	303.418	84.0387	88.9556	65.1415	3.12218	1.64255	up
GO:0042130	negative regulation of T cell proliferation	biological_process	11	0.0137208	ENSRNOG00000013304	Arg1	arginase 1 [Source:RGD Symbol;Acc:2150]	8.35733	12.4054	14.4375	5.09255	6.15658	5.0671	2.15737	1.10928	up
GO:0042130	negative regulation of T cell proliferation	biological_process	11	0.0137208	ENSRNOG00000016945	Pla2g2a	phospholipase A2 group IIA [Source:RGD Symbol;Acc:620857]	31.8882	19.843	49.1573	12.1527	19.2349	10.06	2.43412	1.2834	up
GO:0048286	lung alveolus development	biological_process	5	0.0137208	ENSRNOG00000007002	Lif	LIF, interleukin 6 family cytokine [Source:RGD Symbol;Acc:620865]	0.880568	1.01865	1.04408	0.472627	0.322036	0.294568	2.70218	1.43413	up
GO:0048286	lung alveolus development	biological_process	5	0.0137208	ENSRNOG00000014170	Dbn1	drebrin 1 [Source:RGD Symbol;Acc:70885]	10.9214	12.9572	10.2577	6.1132	4.51819	6.14413	2.03489	1.02495	up
GO:0048286	lung alveolus development	biological_process	5	0.0137208	ENSRNOG00000057092	Slfn4	schlafen 4 [Source:RGD Symbol;Acc:620455]	21.7386	11.4292	13.1179	72.3427	28.11	100.08	0.230813	-2.1152	down
GO:0051015	actin filament binding	molecular_function	7	0.0139459	ENSRNOG00000004177	Myo1a	myosin IA [Source:RGD Symbol;Acc:3135]	0.621574	0.513884	0.299639	1.36739	1.14678	1.28165	0.378073	-1.40326	down
GO:0051015	actin filament binding	molecular_function	7	0.0139459	ENSRNOG00000009951	Aif1l	allograft inflammatory factor 1-like [Source:RGD Symbol;Acc:1305081]	1.94247	4.30351	3.17287	1.2613	0.881366	0.925637	3.06973	1.61811	up
GO:0051015	actin filament binding	molecular_function	7	0.0139459	ENSRNOG00000013641	Myo7a	myosin VIIA [Source:RGD Symbol;Acc:628830]	1.16161	0.900417	1.40572	0.61878	0.548688	0.42358	2.17954	1.12402	up
GO:0051015	actin filament binding	molecular_function	7	0.0139459	ENSRNOG00000014170	Dbn1	drebrin 1 [Source:RGD Symbol;Acc:70885]	10.9214	12.9572	10.2577	6.1132	4.51819	6.14413	2.03489	1.02495	up
GO:0051015	actin filament binding	molecular_function	7	0.0139459	ENSRNOG00000015408	Vil1	villin 1 [Source:RGD Symbol;Acc:1307048]	0.852	0.23051	0.408527	1.89595	1.63924	3.09661	0.224832	-2.15308	down
GO:0051015	actin filament binding	molecular_function	7	0.0139459	ENSRNOG00000022533	Micall2	MICAL-like 2 [Source:RGD Symbol;Acc:1307875]	2.02891	2.05633	4.06871	1.46972	0.930644	1.29824	2.2046	1.14052	up
GO:0051015	actin filament binding	molecular_function	7	0.0139459	ENSRNOG00000050419	Avil	advillin [Source:RGD Symbol;Acc:620301]	6.31377	2.1294	2.52143	10.1149	10.8506	13.1395	0.321495	-1.63713	down
GO:0043065	positive regulation of apoptotic process	biological_process	9	0.0140654	ENSRNOG00000000768	Ubd	ubiquitin D [Source:RGD Symbol;Acc:69418]	0.852352	1.11817	10.1361	0.399383	0.741507	0.752221	6.39509	2.67697	up
GO:0043065	positive regulation of apoptotic process	biological_process	9	0.0140654	ENSRNOG00000002978	Faslg	Fas ligand [Source:RGD Symbol;Acc:3880]	0.709471	0.473535	1.27202	2.10948	1.83509	3.11962	0.347531	-1.52479	down
GO:0043065	positive regulation of apoptotic process	biological_process	9	0.0140654	ENSRNOG00000007765	Frzb	frizzled-related protein [Source:RGD Symbol;Acc:1311315]	3.17213	4.68488	12.4008	2.30154	1.72858	2.68979	3.01459	1.59196	up
GO:0043065	positive regulation of apoptotic process	biological_process	9	0.0140654	ENSRNOG00000010603	Gzma	granzyme A [Source:RGD Symbol;Acc:628640]	8.31047	7.27624	8.60605	18.3746	12.8989	25.6912	0.424698	-1.23549	down
GO:0043065	positive regulation of apoptotic process	biological_process	9	0.0140654	ENSRNOG00000014117	Hmox1	heme oxygenase 1 [Source:RGD Symbol;Acc:2806]	31.9406	70.2869	56.3487	14.3785	22.3463	16.8387	2.96053	1.56586	up
GO:0043065	positive regulation of apoptotic process	biological_process	9	0.0140654	ENSRNOG00000017783	Sfrp1	secreted frizzled-related protein 1 [Source:RGD Symbol;Acc:621074]	1.68002	2.38548	4.44256	1.64961	1.21244	0.920778	2.24913	1.16937	up
GO:0043065	positive regulation of apoptotic process	biological_process	9	0.0140654	ENSRNOG00000018598	Ankrd1	ankyrin repeat domain 1 [Source:RGD Symbol;Acc:61989]	52.1948	92.124	57.3024	26.6198	31.8094	17.7761	2.64577	1.40369	up
GO:0043065	positive regulation of apoptotic process	biological_process	9	0.0140654	ENSRNOG00000021201	Txnip	thioredoxin interacting protein [Source:RGD Symbol;Acc:620886]	381.684	279.835	482.899	706.409	874.051	787.516	0.483289	-1.04904	down
GO:0043065	positive regulation of apoptotic process	biological_process	9	0.0140654	ENSRNOG00000024365	Ect2	epithelial cell transforming 2 [Source:RGD Symbol;Acc:1308524]	1.29219	2.68213	3.60527	1.27175	1.0084	0.842832	2.42703	1.27919	up
GO:0030324	lung development	biological_process	6	0.0141059	ENSRNOG00000007002	Lif	LIF, interleukin 6 family cytokine [Source:RGD Symbol;Acc:620865]	0.880568	1.01865	1.04408	0.472627	0.322036	0.294568	2.70218	1.43413	up
GO:0030324	lung development	biological_process	6	0.0141059	ENSRNOG00000013304	Arg1	arginase 1 [Source:RGD Symbol;Acc:2150]	8.35733	12.4054	14.4375	5.09255	6.15658	5.0671	2.15737	1.10928	up
GO:0030324	lung development	biological_process	6	0.0141059	ENSRNOG00000025120	Gli1	GLI family zinc finger 1 [Source:RGD Symbol;Acc:621673]	3.07771	4.09095	3.67171	1.56395	1.68971	1.52278	2.26955	1.18241	up
GO:0030324	lung development	biological_process	6	0.0141059	ENSRNOG00000053272	Chi3l1	chitinase 3 like 1 [Source:RGD Symbol;Acc:620874]	78.1203	93.0092	101.602	41.6996	35.3419	56.541	2.04167	1.02975	up
GO:0030324	lung development	biological_process	6	0.0141059	ENSRNOG00000061484	Adamts2	ADAM metallopeptidase with thrombospondin type 1 motif, 2 [Source:RGD Symbol;Acc:1565950]	25.0103	33.9663	18.8295	11.0781	12.1949	11.6513	2.22785	1.15565	up
GO:0003774	motor activity	molecular_function	9	0.0141059	ENSRNOG00000004177	Myo1a	myosin IA [Source:RGD Symbol;Acc:3135]	0.621574	0.513884	0.299639	1.36739	1.14678	1.28165	0.378073	-1.40326	down
GO:0003774	motor activity	molecular_function	9	0.0141059	ENSRNOG00000009339	Cenpe	centromere protein E [Source:RGD Symbol;Acc:1307115]	0.788656	1.3332	1.09251	0.574257	0.391805	0.597516	2.05577	1.03968	up
GO:0003774	motor activity	molecular_function	9	0.0141059	ENSRNOG00000013641	Myo7a	myosin VIIA [Source:RGD Symbol;Acc:628830]	1.16161	0.900417	1.40572	0.61878	0.548688	0.42358	2.17954	1.12402	up
GO:0003774	motor activity	molecular_function	9	0.0141059	ENSRNOG00000019100	Kif2c	kinesin family member 2C [Source:RGD Symbol;Acc:620239]	1.12797	1.74616	2.14007	0.711131	0.585884	0.897951	2.28441	1.19182	up
GO:0003774	motor activity	molecular_function	9	0.0141059	ENSRNOG00000023993	Kif1a	kinesin family member 1A [Source:RGD Symbol;Acc:1304996]	0.166506	0.124253	0.194855	0.636146	0.353681	0.430159	0.341985	-1.54799	down
GO:0070374	positive regulation of ERK1 and ERK2 cascade	biological_process	12	0.01436	ENSRNOG00000008816	Gpnmb	glycoprotein nmb [Source:RGD Symbol;Acc:71008]	193.456	246.629	303.418	84.0387	88.9556	65.1415	3.12218	1.64255	up
GO:0070374	positive regulation of ERK1 and ERK2 cascade	biological_process	12	0.01436	ENSRNOG00000013578	Trem2	triggering receptor expressed on myeloid cells 2 [Source:RGD Symbol;Acc:1309841]	7.38714	14.2293	26.9458	3.19457	3.44342	4.12088	4.51369	2.17431	up
GO:0070374	positive regulation of ERK1 and ERK2 cascade	biological_process	12	0.01436	ENSRNOG00000016945	Pla2g2a	phospholipase A2 group IIA [Source:RGD Symbol;Acc:620857]	31.8882	19.843	49.1573	12.1527	19.2349	10.06	2.43412	1.2834	up
GO:0070374	positive regulation of ERK1 and ERK2 cascade	biological_process	12	0.01436	ENSRNOG00000028548	Ccl9	chemokine (C-C motif) ligand 9 [Source:RGD Symbol;Acc:1310563]	31.354	22.2453	32.1143	12.7972	13.0843	8.17364	2.5169	1.33165	up
GO:0070374	positive regulation of ERK1 and ERK2 cascade	biological_process	12	0.01436	ENSRNOG00000031162	Ccl24	C-C motif chemokine ligand 24 [Source:RGD Symbol;Acc:1310245]	2.95267	4.5172	2.6358	1.47836	0.899061	1.85835	2.38579	1.25447	up
GO:0070374	positive regulation of ERK1 and ERK2 cascade	biological_process	12	0.01436	ENSRNOG00000034290	Ccl21	C-C motif chemokine ligand 21 [Source:RGD Symbol;Acc:1311996]	71.933	100.476	149.957	63.5991	39.5568	57.0998	2.01157	1.00832	up
GO:0070374	positive regulation of ERK1 and ERK2 cascade	biological_process	12	0.01436	ENSRNOG00000053272	Chi3l1	chitinase 3 like 1 [Source:RGD Symbol;Acc:620874]	78.1203	93.0092	101.602	41.6996	35.3419	56.541	2.04167	1.02975	up
GO:0008437	thyrotropin-releasing hormone activity	molecular_function	8	0.0148181	ENSRNOG00000011824	Trh	thyrotropin releasing hormone [Source:RGD Symbol;Acc:3903]	0.198757	0.928469	2.94448	0	0.220139	0.033459	16.0558	4.00502	up
GO:1904622	negative regulation of actin-dependent ATPase activity	biological_process	9	0.0148181	ENSRNOG00000014170	Dbn1	drebrin 1 [Source:RGD Symbol;Acc:70885]	10.9214	12.9572	10.2577	6.1132	4.51819	6.14413	2.03489	1.02495	up
GO:1990435	upper tip-link density	cellular_component	6	0.0148181	ENSRNOG00000013641	Myo7a	myosin VIIA [Source:RGD Symbol;Acc:628830]	1.16161	0.900417	1.40572	0.61878	0.548688	0.42358	2.17954	1.12402	up
GO:0050828	regulation of liquid surface tension	biological_process	6	0.0148181	ENSRNOG00000013859	Bpifa1	BPI fold containing family A, member 1 [Source:RGD Symbol;Acc:619818]	0.423531	0.205181	928.063	0.160324	0.123339	0.870753	804.469	9.65189	up
GO:1905006	negative regulation of epithelial to mesenchymal transition involved in endocardial cushion formation	biological_process	10	0.0148181	ENSRNOG00000023683	Nog	noggin [Source:RGD Symbol;Acc:3183]	1.3224	2.21724	1.19676	0.464518	0.534484	0.368221	3.46425	1.79254	up
GO:0032395	MHC class II receptor activity	molecular_function	6	0.0148181	ENSRNOG00000026371	Krt17	keratin 17 [Source:RGD Symbol;Acc:1303181]	0.712225	1.13969	8.88744	0.287772	0.439651	0.911312	6.55344	2.71225	up
GO:0047484	regulation of response to osmotic stress	biological_process	7	0.0148181	ENSRNOG00000032871	Mlc1	modulator of VRAC current 1 [Source:RGD Symbol;Acc:1308552]	2.77574	1.49853	1.20774	4.12707	7.92023	3.89051	0.343963	-1.53968	down
GO:0004087	carbamoyl-phosphate synthase (ammonia) activity	molecular_function	6	0.0148181	ENSRNOG00000013704	Cps1	carbamoyl-phosphate synthase 1 [Source:RGD Symbol;Acc:2395]	0.0296366	0.0318274	0.0321218	0	0	0	311.953	8.28518	up
GO:1903126	negative regulation of centriole-centriole cohesion	biological_process	10	0.0148181	ENSRNOG00000004487	Nek2	NIMA (never in mitosis gene a)-related kinase 2-like 1 [Source:RGD Symbol;Acc:1582899]	1.56838	1.81988	3.87627	0.970926	0.827985	1.08667	2.51752	1.33201	up
GO:0099606	microtubule plus-end directed mitotic chromosome migration	biological_process	8	0.0148181	ENSRNOG00000009339	Cenpe	centromere protein E [Source:RGD Symbol;Acc:1307115]	0.788656	1.3332	1.09251	0.574257	0.391805	0.597516	2.05577	1.03968	up
GO:0045578	negative regulation of B cell differentiation	biological_process	10	0.0148181	ENSRNOG00000017783	Sfrp1	secreted frizzled-related protein 1 [Source:RGD Symbol;Acc:621074]	1.68002	2.38548	4.44256	1.64961	1.21244	0.920778	2.24913	1.16937	up
GO:0120044	stereocilium base	cellular_component	4	0.0148181	ENSRNOG00000013641	Myo7a	myosin VIIA [Source:RGD Symbol;Acc:628830]	1.16161	0.900417	1.40572	0.61878	0.548688	0.42358	2.17954	1.12402	up
GO:1903815	negative regulation of collecting lymphatic vessel constriction	biological_process	7	0.0148181	ENSRNOG00000008176	Nppa	natriuretic peptide A [Source:RGD Symbol;Acc:3193]	0	0	4.77912	0	0	0	15930.4	13.9595	up
GO:0006864	pyrimidine nucleotide transport	biological_process	9	0.0148181	ENSRNOG00000016949	Slc25a33	solute carrier family 25 member 33 [Source:RGD Symbol;Acc:1583942]	16.1568	14.3339	12.404	29.8604	28.5655	33.4012	0.467124	-1.09812	down
GO:0034127	regulation of MyD88-independent toll-like receptor signaling pathway	biological_process	9	0.0148181	ENSRNOG00000017414	Irf7	interferon regulatory factor 7 [Source:RGD Symbol;Acc:1307828]	50.0909	39.3499	31.835	103.562	77.9961	166.957	0.347979	-1.52293	down
GO:0031732	CCR7 chemokine receptor binding	molecular_function	9	0.0148181	ENSRNOG00000034290	Ccl21	C-C motif chemokine ligand 21 [Source:RGD Symbol;Acc:1311996]	71.933	100.476	149.957	63.5991	39.5568	57.0998	2.01157	1.00832	up
GO:0099642	retrograde axonal protein transport	biological_process	12	0.0148181	ENSRNOG00000022635	Dlg2	discs large MAGUK scaffold protein 2 [Source:RGD Symbol;Acc:619895]	0.884341	1.52643	2.40362	0.647262	0.40045	0.624041	2.87985	1.52599	up
GO:0099550	trans-synaptic signaling, modulating synaptic transmission	biological_process	9	0.0148181	ENSRNOG00000020833	Cspg5	chondroitin sulfate proteoglycan 5 [Source:RGD Symbol;Acc:2431]	1.01362	1.31543	1.50196	0.355355	0.368381	0.655816	2.77699	1.47352	up
GO:2000431	regulation of cytokinesis, actomyosin contractile ring assembly	biological_process	10	0.0148181	ENSRNOG00000024365	Ect2	epithelial cell transforming 2 [Source:RGD Symbol;Acc:1308524]	1.29219	2.68213	3.60527	1.27175	1.0084	0.842832	2.42703	1.27919	up
GO:0031300	intrinsic component of organelle membrane	cellular_component	5	0.0148181	ENSRNOG00000015774	Mreg	melanoregulin [Source:RGD Symbol;Acc:1562333]	0.740493	1.5783	3.06853	0.453484	0.431069	0.6671	3.472	1.79577	up
GO:0034146	toll-like receptor 5 signaling pathway	biological_process	9	0.0148181	ENSRNOG00000022067	Tlr5	toll-like receptor 5 [Source:RGD Symbol;Acc:631351]	3.79088	2.48157	3.94515	1.49858	1.60221	1.77419	2.09592	1.06759	up
GO:0001692	histamine metabolic process	biological_process	9	0.0148181	ENSRNOG00000011824	Trh	thyrotropin releasing hormone [Source:RGD Symbol;Acc:3903]	0.198757	0.928469	2.94448	0	0.220139	0.033459	16.0558	4.00502	up
GO:0014034	neural crest cell fate commitment	biological_process	7	0.0148181	ENSRNOG00000017783	Sfrp1	secreted frizzled-related protein 1 [Source:RGD Symbol;Acc:621074]	1.68002	2.38548	4.44256	1.64961	1.21244	0.920778	2.24913	1.16937	up
GO:0097376	interneuron axon guidance	biological_process	7	0.0148181	ENSRNOG00000010905	Dlx5	distal-less homeobox 5 [Source:RGD Symbol;Acc:2506]	0.333893	0.067122	0.257194	0	0	0	2194.03	11.0994	up
GO:0060327	cytoplasmic actin-based contraction involved in cell motility	biological_process	7	0.0148181	ENSRNOG00000015408	Vil1	villin 1 [Source:RGD Symbol;Acc:1307048]	0.852	0.23051	0.408527	1.89595	1.63924	3.09661	0.224832	-2.15308	down
GO:0019547	arginine catabolic process to ornithine	biological_process	13	0.0148181	ENSRNOG00000013304	Arg1	arginase 1 [Source:RGD Symbol;Acc:2150]	8.35733	12.4054	14.4375	5.09255	6.15658	5.0671	2.15737	1.10928	up
GO:1904113	negative regulation of muscle filament sliding	biological_process	10	0.0148181	ENSRNOG00000014170	Dbn1	drebrin 1 [Source:RGD Symbol;Acc:70885]	10.9214	12.9572	10.2577	6.1132	4.51819	6.14413	2.03489	1.02495	up
GO:0002246	wound healing involved in inflammatory response	biological_process	7	0.0148181	ENSRNOG00000014117	Hmox1	heme oxygenase 1 [Source:RGD Symbol;Acc:2806]	31.9406	70.2869	56.3487	14.3785	22.3463	16.8387	2.96053	1.56586	up
GO:0021859	pyramidal neuron differentiation	biological_process	8	0.0148181	ENSRNOG00000011858	Unc5d	unc-5 netrin receptor D [Source:RGD Symbol;Acc:1309245]	0	0.0165455	0	0.397214	0.0649044	0.0837426	0.0303107	-5.04403	down
GO:2000054	negative regulation of Wnt signaling pathway involved in dorsal/ventral axis specification	biological_process	10	0.0148181	ENSRNOG00000017783	Sfrp1	secreted frizzled-related protein 1 [Source:RGD Symbol;Acc:621074]	1.68002	2.38548	4.44256	1.64961	1.21244	0.920778	2.24913	1.16937	up
GO:0018601	4-nitrophenol 2-monooxygenase activity	molecular_function	7	0.0148181	ENSRNOG00000012458	Cyp2e1	cytochrome P450, family 2, subfamily e, polypeptide 1 [Source:RGD Symbol;Acc:2475]	5.70974	4.74285	4.83838	17.7295	21.6301	20.9411	0.253579	-1.97949	down
GO:0033316	meiotic spindle assembly checkpoint	biological_process	7	0.0148181	ENSRNOG00000029055	Ttk	Ttk protein kinase [Source:RGD Symbol;Acc:1305558]	0.567316	1.43363	1.35383	0.510706	0.373299	0.471024	2.4758	1.30789	up
GO:0031726	CCR1 chemokine receptor binding	molecular_function	9	0.0148181	ENSRNOG00000010906	Ccl5	C-C motif chemokine ligand 5 [Source:RGD Symbol;Acc:69069]	48.3284	41.7605	33.5398	89.039	63.5136	135.101	0.429784	-1.21832	down
GO:0060032	notochord regression	biological_process	5	0.0148181	ENSRNOG00000025120	Gli1	GLI family zinc finger 1 [Source:RGD Symbol;Acc:621673]	3.07771	4.09095	3.67171	1.56395	1.68971	1.52278	2.26955	1.18241	up
GO:0005584	collagen type I trimer	cellular_component	6	0.0148181	ENSRNOG00000003897	Col1a1	collagen type I alpha 1 chain [Source:RGD Symbol;Acc:61817]	126.27	249.911	273.591	58.1167	63.4283	51.677	3.75109	1.90731	up
GO:0048685	negative regulation of collateral sprouting of intact axon in response to injury	biological_process	9	0.0148181	ENSRNOG00000043451	Spp1	secreted phosphoprotein 1 [Source:RGD Symbol;Acc:3752]	5.06055	8.53045	47.2968	2.53233	1.09522	0.50064	14.7493	3.88257	up
GO:0034112	positive regulation of homotypic cell-cell adhesion	biological_process	8	0.0148181	ENSRNOG00000010906	Ccl5	C-C motif chemokine ligand 5 [Source:RGD Symbol;Acc:69069]	48.3284	41.7605	33.5398	89.039	63.5136	135.101	0.429784	-1.21832	down
GO:0120003	hinge region between urothelial plaques of apical plasma membrane	cellular_component	5	0.0148181	ENSRNOG00000015445	Mal	mal, T-cell differentiation protein [Source:RGD Symbol;Acc:3037]	4.28993	6.10298	7.71911	8.68788	11.4303	17.2031	0.485301	-1.04305	down
GO:0031477	myosin VII complex	cellular_component	6	0.0148181	ENSRNOG00000013641	Myo7a	myosin VIIA [Source:RGD Symbol;Acc:628830]	1.16161	0.900417	1.40572	0.61878	0.548688	0.42358	2.17954	1.12402	up
GO:0046817	chemokine receptor antagonist activity	molecular_function	7	0.0148181	ENSRNOG00000010906	Ccl5	C-C motif chemokine ligand 5 [Source:RGD Symbol;Acc:69069]	48.3284	41.7605	33.5398	89.039	63.5136	135.101	0.429784	-1.21832	down
GO:0019785	ISG15-specific protease activity	molecular_function	9	0.0148181	ENSRNOG00000037198	Usp18	ubiquitin specific peptidase 18 [Source:RGD Symbol;Acc:1359153]	13.1785	11.7285	9.52241	26.2124	16.1245	31.1509	0.468505	-1.09387	down
GO:0072599	establishment of protein localization to endoplasmic reticulum	biological_process	9	0.0148181	ENSRNOG00000017060	Ryr2	ryanodine receptor 2 [Source:RGD Symbol;Acc:620314]	0.285075	0.300051	1.47817	0.173643	0.049516	0.188027	5.01792	2.32709	up
GO:0050720	interleukin-1 beta biosynthetic process	biological_process	9	0.0148181	ENSRNOG00000020563	Cma1	chymase 1 [Source:RGD Symbol;Acc:2365]	1.06288	11.2426	14.4618	0.948545	1.00838	1.53025	7.6759	2.94034	up
GO:0001791	IgM binding	molecular_function	6	0.0148181	ENSRNOG00000020837	Cd300lg	Cd300 molecule-like family member G [Source:RGD Symbol;Acc:1584376]	1.60214	0.651749	3.22129	0.235774	0.385302	0.551614	4.6689	2.22308	up
GO:0120035	regulation of plasma membrane bounded cell projection organization	biological_process	8	0.0148181	ENSRNOG00000013578	Trem2	triggering receptor expressed on myeloid cells 2 [Source:RGD Symbol;Acc:1309841]	7.38714	14.2293	26.9458	3.19457	3.44342	4.12088	4.51369	2.17431	up
GO:0061108	seminal vesicle epithelium development	biological_process	6	0.0148181	ENSRNOG00000015461	Serpine2	serpin family E member 2 [Source:RGD Symbol;Acc:3748]	21.8704	32.5856	37.2124	17.0684	13.4899	15.117	2.00695	1.00501	up
GO:0098746	fast, calcium ion-dependent exocytosis of neurotransmitter	biological_process	11	0.0148181	ENSRNOG00000006426	Syt1	synaptotagmin 1 [Source:RGD Symbol;Acc:3803]	0.535581	0.254328	0.726439	1.20032	1.83951	1.33849	0.346332	-1.52977	down
GO:0032634	interleukin-5 production	biological_process	5	0.0148181	ENSRNOG00000016804	Il25	interleukin 25 [Source:RGD Symbol;Acc:1561632]	0.051869	0.094698	0.050163	0.853721	0.318759	0.438559	0.122114	-3.0337	down
GO:0002228	natural killer cell mediated immunity	biological_process	7	0.0148181	ENSRNOG00000060246	Klrd1	killer cell lectin like receptor D1 [Source:RGD Symbol;Acc:2978]	3.34348	2.3231	3.44577	7.56228	4.74204	9.73844	0.413394	-1.27441	down
GO:0098828	modulation of inhibitory postsynaptic potential	biological_process	8	0.0148181	ENSRNOG00000014170	Dbn1	drebrin 1 [Source:RGD Symbol;Acc:70885]	10.9214	12.9572	10.2577	6.1132	4.51819	6.14413	2.03489	1.02495	up
GO:1901624	negative regulation of lymphocyte chemotaxis	biological_process	9	0.0148181	ENSRNOG00000007574	Padi2	peptidyl arginine deiminase 2 [Source:RGD Symbol;Acc:3288]	1.05408	0.426038	0.672806	1.90207	1.87646	2.07766	0.367632	-1.44367	down
GO:1902685	positive regulation of receptor localization to synapse	biological_process	7	0.0148181	ENSRNOG00000014170	Dbn1	drebrin 1 [Source:RGD Symbol;Acc:70885]	10.9214	12.9572	10.2577	6.1132	4.51819	6.14413	2.03489	1.02495	up
GO:0071855	neuropeptide receptor binding	molecular_function	7	0.0148181	ENSRNOG00000008176	Nppa	natriuretic peptide A [Source:RGD Symbol;Acc:3193]	0	0	4.77912	0	0	0	15930.4	13.9595	up
GO:0060825	fibroblast growth factor receptor signaling pathway involved in neural plate anterior/posterior pattern formation	biological_process	9	0.0148181	ENSRNOG00000023683	Nog	noggin [Source:RGD Symbol;Acc:3183]	1.3224	2.21724	1.19676	0.464518	0.534484	0.368221	3.46425	1.79254	up
GO:1901676	positive regulation of histone H3-K27 acetylation	biological_process	12	0.0148181	ENSRNOG00000007002	Lif	LIF, interleukin 6 family cytokine [Source:RGD Symbol;Acc:620865]	0.880568	1.01865	1.04408	0.472627	0.322036	0.294568	2.70218	1.43413	up
GO:0051125	regulation of actin nucleation	biological_process	9	0.0148181	ENSRNOG00000015408	Vil1	villin 1 [Source:RGD Symbol;Acc:1307048]	0.852	0.23051	0.408527	1.89595	1.63924	3.09661	0.224832	-2.15308	down
GO:0090193	positive regulation of glomerulus development	biological_process	8	0.0148181	ENSRNOG00000023683	Nog	noggin [Source:RGD Symbol;Acc:3183]	1.3224	2.21724	1.19676	0.464518	0.534484	0.368221	3.46425	1.79254	up
GO:1903096	protein localization to meiotic spindle midzone	biological_process	11	0.0148181	ENSRNOG00000029055	Ttk	Ttk protein kinase [Source:RGD Symbol;Acc:1305558]	0.567316	1.43363	1.35383	0.510706	0.373299	0.471024	2.4758	1.30789	up
GO:0031751	D4 dopamine receptor binding	molecular_function	8	0.0148181	ENSRNOG00000028404	Ppp1r1b	protein phosphatase 1, regulatory (inhibitor) subunit 1B [Source:RGD Symbol;Acc:621859]	22.4231	7.67647	15.2862	32.2533	35.5582	36.4644	0.435248	-1.20009	down
GO:0046434	organophosphate catabolic process	biological_process	7	0.0148181	ENSRNOG00000008902	Pon1	paraoxonase 1 [Source:RGD Symbol;Acc:620062]	4.94993	3.6737	3.80655	9.75741	7.38752	8.1471	0.491466	-1.02484	down
GO:0097577	sequestering of iron ion	biological_process	6	0.0148181	ENSRNOG00000013973	Lcn2	lipocalin 2 [Source:RGD Symbol;Acc:69408]	399.193	738.611	424.407	107.199	115.007	143.758	4.26876	2.09382	up
GO:0014741	negative regulation of muscle hypertrophy	biological_process	9	0.0148181	ENSRNOG00000021294	Mstn	myostatin [Source:RGD Symbol;Acc:3115]	0.059124	1.35602	0.037337	0	0	0	4841.6	12.2413	up
GO:0042628	mating plug formation	biological_process	6	0.0148181	ENSRNOG00000015461	Serpine2	serpin family E member 2 [Source:RGD Symbol;Acc:3748]	21.8704	32.5856	37.2124	17.0684	13.4899	15.117	2.00695	1.00501	up
GO:0060016	granulosa cell development	biological_process	7	0.0148181	ENSRNOG00000002984	Bmp15	bone morphogenetic protein 15 [Source:RGD Symbol;Acc:70990]	0.893187	0.650831	0.851556	2.84528	1.94488	1.92699	0.356635	-1.48748	down
GO:0090246	convergent extension involved in somitogenesis	biological_process	7	0.0148181	ENSRNOG00000017783	Sfrp1	secreted frizzled-related protein 1 [Source:RGD Symbol;Acc:621074]	1.68002	2.38548	4.44256	1.64961	1.21244	0.920778	2.24913	1.16937	up
GO:0070856	myosin VI light chain binding	molecular_function	8	0.0148181	ENSRNOG00000027894	Iqgap3	IQ motif containing GTPase activating protein 3 [Source:RGD Symbol;Acc:1305951]	1.60168	2.19219	2.04078	0.916376	0.778468	1.20012	2.01545	1.0111	up
GO:1904905	negative regulation of endothelial cell-matrix adhesion via fibronectin	biological_process	9	0.0148181	ENSRNOG00000030187	Mmp12	matrix metallopeptidase 12 [Source:RGD Symbol;Acc:620195]	0.8267	3.66773	18.8195	0.329763	0.456892	0.690975	15.7779	3.97983	up
GO:0150078	positive regulation of neuroinflammatory response	biological_process	10	0.0148181	ENSRNOG00000009907	Mmp8	matrix metallopeptidase 8 [Source:RGD Symbol;Acc:631408]	1.2795	0.827246	0.892774	2.57064	1.58073	4.86069	0.332834	-1.58712	down
GO:0046851	negative regulation of bone remodeling	biological_process	8	0.0148181	ENSRNOG00000017783	Sfrp1	secreted frizzled-related protein 1 [Source:RGD Symbol;Acc:621074]	1.68002	2.38548	4.44256	1.64961	1.21244	0.920778	2.24913	1.16937	up
GO:0035821	modification of morphology or physiology of other organism	biological_process	5	0.0148181	ENSRNOG00000011483	S100a9	S100 calcium binding protein A9 [Source:RGD Symbol;Acc:620267]	20.221	25.7548	22.6237	43.4388	35.8205	91.6187	0.401453	-1.3167	down
GO:2000350	positive regulation of CD40 signaling pathway	biological_process	9	0.0148181	ENSRNOG00000013578	Trem2	triggering receptor expressed on myeloid cells 2 [Source:RGD Symbol;Acc:1309841]	7.38714	14.2293	26.9458	3.19457	3.44342	4.12088	4.51369	2.17431	up
GO:0032078	negative regulation of endodeoxyribonuclease activity	biological_process	11	0.0148181	ENSRNOG00000010603	Gzma	granzyme A [Source:RGD Symbol;Acc:628640]	8.31047	7.27624	8.60605	18.3746	12.8989	25.6912	0.424698	-1.23549	down
GO:0034395	regulation of transcription from RNA polymerase II promoter in response to iron	biological_process	10	0.0148181	ENSRNOG00000014117	Hmox1	heme oxygenase 1 [Source:RGD Symbol;Acc:2806]	31.9406	70.2869	56.3487	14.3785	22.3463	16.8387	2.96053	1.56586	up
GO:1903082	positive regulation of C-C chemokine receptor CCR7 signaling pathway	biological_process	11	0.0148181	ENSRNOG00000013578	Trem2	triggering receptor expressed on myeloid cells 2 [Source:RGD Symbol;Acc:1309841]	7.38714	14.2293	26.9458	3.19457	3.44342	4.12088	4.51369	2.17431	up
GO:0098737	protein insertion into plasma membrane	biological_process	9	0.0148181	ENSRNOG00000015445	Mal	mal, T-cell differentiation protein [Source:RGD Symbol;Acc:3037]	4.28993	6.10298	7.71911	8.68788	11.4303	17.2031	0.485301	-1.04305	down
GO:1901076	positive regulation of engulfment of apoptotic cell	biological_process	10	0.0148181	ENSRNOG00000013578	Trem2	triggering receptor expressed on myeloid cells 2 [Source:RGD Symbol;Acc:1309841]	7.38714	14.2293	26.9458	3.19457	3.44342	4.12088	4.51369	2.17431	up
GO:2000529	positive regulation of myeloid dendritic cell chemotaxis	biological_process	10	0.0148181	ENSRNOG00000034290	Ccl21	C-C motif chemokine ligand 21 [Source:RGD Symbol;Acc:1311996]	71.933	100.476	149.957	63.5991	39.5568	57.0998	2.01157	1.00832	up
GO:0071911	synchronous neurotransmitter secretion	biological_process	7	0.0148181	ENSRNOG00000006426	Syt1	synaptotagmin 1 [Source:RGD Symbol;Acc:3803]	0.535581	0.254328	0.726439	1.20032	1.83951	1.33849	0.346332	-1.52977	down
GO:0032616	interleukin-13 production	biological_process	5	0.0148181	ENSRNOG00000016804	Il25	interleukin 25 [Source:RGD Symbol;Acc:1561632]	0.051869	0.094698	0.050163	0.853721	0.318759	0.438559	0.122114	-3.0337	down
GO:0044345	stromal-epithelial cell signaling involved in prostate gland development	biological_process	6	0.0148181	ENSRNOG00000017783	Sfrp1	secreted frizzled-related protein 1 [Source:RGD Symbol;Acc:621074]	1.68002	2.38548	4.44256	1.64961	1.21244	0.920778	2.24913	1.16937	up
GO:1903718	cellular response to ammonia	biological_process	7	0.0148181	ENSRNOG00000013704	Cps1	carbamoyl-phosphate synthase 1 [Source:RGD Symbol;Acc:2395]	0.0296366	0.0318274	0.0321218	0	0	0	311.953	8.28518	up
GO:2000080	negative regulation of canonical Wnt signaling pathway involved in controlling type B pancreatic cell proliferation	biological_process	8	0.0148181	ENSRNOG00000017783	Sfrp1	secreted frizzled-related protein 1 [Source:RGD Symbol;Acc:621074]	1.68002	2.38548	4.44256	1.64961	1.21244	0.920778	2.24913	1.16937	up
GO:1903640	negative regulation of gastrin-induced gastric acid secretion	biological_process	10	0.0148181	ENSRNOG00000017873	Sct	secretin [Source:RGD Symbol;Acc:3643]	1.23791	1.93048	2.4561	0.102153	0.550348	0.362674	5.54041	2.46999	up
GO:0007418	ventral midline development	biological_process	5	0.0148181	ENSRNOG00000025120	Gli1	GLI family zinc finger 1 [Source:RGD Symbol;Acc:621673]	3.07771	4.09095	3.67171	1.56395	1.68971	1.52278	2.26955	1.18241	up
GO:1902618	cellular response to fluoride	biological_process	7	0.0148181	ENSRNOG00000003897	Col1a1	collagen type I alpha 1 chain [Source:RGD Symbol;Acc:61817]	126.27	249.911	273.591	58.1167	63.4283	51.677	3.75109	1.90731	up
GO:2000612	regulation of thyroid-stimulating hormone secretion	biological_process	10	0.0148181	ENSRNOG00000026203	Pax8	paired box 8 [Source:RGD Symbol;Acc:620434]	0.679274	0.646556	1.36295	0.21796	0.383172	0.130189	3.6766	1.87837	up
GO:0043924	suramin binding	molecular_function	5	0.0148181	ENSRNOG00000017060	Ryr2	ryanodine receptor 2 [Source:RGD Symbol;Acc:620314]	0.285075	0.300051	1.47817	0.173643	0.049516	0.188027	5.01792	2.32709	up
GO:0099607	lateral attachment of mitotic spindle microtubules to kinetochore	biological_process	7	0.0148181	ENSRNOG00000009339	Cenpe	centromere protein E [Source:RGD Symbol;Acc:1307115]	0.788656	1.3332	1.09251	0.574257	0.391805	0.597516	2.05577	1.03968	up
GO:1903235	positive regulation of calcium ion-dependent exocytosis of neurotransmitter	biological_process	11	0.0148181	ENSRNOG00000006426	Syt1	synaptotagmin 1 [Source:RGD Symbol;Acc:3803]	0.535581	0.254328	0.726439	1.20032	1.83951	1.33849	0.346332	-1.52977	down
GO:2000313	regulation of fibroblast growth factor receptor signaling pathway involved in neural plate anterior/posterior pattern formation	biological_process	9	0.0148181	ENSRNOG00000023683	Nog	noggin [Source:RGD Symbol;Acc:3183]	1.3224	2.21724	1.19676	0.464518	0.534484	0.368221	3.46425	1.79254	up
GO:0002414	immunoglobulin transcytosis in epithelial cells	biological_process	8	0.0148181	ENSRNOG00000020837	Cd300lg	Cd300 molecule-like family member G [Source:RGD Symbol;Acc:1584376]	1.60214	0.651749	3.22129	0.235774	0.385302	0.551614	4.6689	2.22308	up
GO:0010963	regulation of L-arginine import	biological_process	9	0.0148181	ENSRNOG00000013304	Arg1	arginase 1 [Source:RGD Symbol;Acc:2150]	8.35733	12.4054	14.4375	5.09255	6.15658	5.0671	2.15737	1.10928	up
GO:0070367	negative regulation of hepatocyte differentiation	biological_process	9	0.0148181	ENSRNOG00000007765	Frzb	frizzled-related protein [Source:RGD Symbol;Acc:1311315]	3.17213	4.68488	12.4008	2.30154	1.72858	2.68979	3.01459	1.59196	up
GO:0031930	mitochondria-nucleus signaling pathway	biological_process	5	0.0148181	ENSRNOG00000016949	Slc25a33	solute carrier family 25 member 33 [Source:RGD Symbol;Acc:1583942]	16.1568	14.3339	12.404	29.8604	28.5655	33.4012	0.467124	-1.09812	down
GO:0046659	digestive hormone activity	molecular_function	8	0.0148181	ENSRNOG00000017873	Sct	secretin [Source:RGD Symbol;Acc:3643]	1.23791	1.93048	2.4561	0.102153	0.550348	0.362674	5.54041	2.46999	up
GO:0021683	cerebellar granular layer morphogenesis	biological_process	5	0.0148181	ENSRNOG00000015461	Serpine2	serpin family E member 2 [Source:RGD Symbol;Acc:3748]	21.8704	32.5856	37.2124	17.0684	13.4899	15.117	2.00695	1.00501	up
GO:0042941	D-alanine transport	biological_process	9	0.0148181	ENSRNOG00000010938	Slc7a10	solute carrier family 7 member 10 [Source:RGD Symbol;Acc:621672]	5.14524	4.07878	5.28848	21.1096	13.4018	15.739	0.288803	-1.79184	down
GO:0086029	Purkinje myocyte to ventricular cardiac muscle cell signaling	biological_process	7	0.0148181	ENSRNOG00000017060	Ryr2	ryanodine receptor 2 [Source:RGD Symbol;Acc:620314]	0.285075	0.300051	1.47817	0.173643	0.049516	0.188027	5.01792	2.32709	up
GO:0070409	carbamoyl phosphate biosynthetic process	biological_process	7	0.0148181	ENSRNOG00000013704	Cps1	carbamoyl-phosphate synthase 1 [Source:RGD Symbol;Acc:2395]	0.0296366	0.0318274	0.0321218	0	0	0	311.953	8.28518	up
GO:0070301	cellular response to hydrogen peroxide	biological_process	8	0.014953	ENSRNOG00000013304	Arg1	arginase 1 [Source:RGD Symbol;Acc:2150]	8.35733	12.4054	14.4375	5.09255	6.15658	5.0671	2.15737	1.10928	up
GO:0070301	cellular response to hydrogen peroxide	biological_process	8	0.014953	ENSRNOG00000013973	Lcn2	lipocalin 2 [Source:RGD Symbol;Acc:69408]	399.193	738.611	424.407	107.199	115.007	143.758	4.26876	2.09382	up
GO:0070301	cellular response to hydrogen peroxide	biological_process	8	0.014953	ENSRNOG00000024365	Ect2	epithelial cell transforming 2 [Source:RGD Symbol;Acc:1308524]	1.29219	2.68213	3.60527	1.27175	1.0084	0.842832	2.42703	1.27919	up
GO:0070301	cellular response to hydrogen peroxide	biological_process	8	0.014953	ENSRNOG00000054218	Il18rap	interleukin 18 receptor accessory protein [Source:RGD Symbol;Acc:727867]	0.952382	0.874742	0.928804	2.62494	1.36523	2.00221	0.459906	-1.12059	down
GO:2001222	regulation of neuron migration	biological_process	8	0.015321	ENSRNOG00000011858	Unc5d	unc-5 netrin receptor D [Source:RGD Symbol;Acc:1309245]	0	0.0165455	0	0.397214	0.0649044	0.0837426	0.0303107	-5.04403	down
GO:2001222	regulation of neuron migration	biological_process	8	0.015321	ENSRNOG00000013917	Igsf10	immunoglobulin superfamily, member 10 [Source:RGD Symbol;Acc:735030]	3.13432	5.68367	5.64416	2.30474	1.81464	2.14471	2.30874	1.20711	up
GO:0070848	response to growth factor	biological_process	6	0.015321	ENSRNOG00000002978	Faslg	Fas ligand [Source:RGD Symbol;Acc:3880]	0.709471	0.473535	1.27202	2.10948	1.83509	3.11962	0.347531	-1.52479	down
GO:0070848	response to growth factor	biological_process	6	0.015321	ENSRNOG00000004610	Lum	lumican [Source:RGD Symbol;Acc:620984]	6.91226	8.37983	35.9543	5.95545	5.12494	5.60998	3.07042	1.61843	up
GO:0031005	filamin binding	molecular_function	6	0.015321	ENSRNOG00000022533	Micall2	MICAL-like 2 [Source:RGD Symbol;Acc:1307875]	2.02891	2.05633	4.06871	1.46972	0.930644	1.29824	2.2046	1.14052	up
GO:0031005	filamin binding	molecular_function	6	0.015321	ENSRNOG00000029079	Hspb7	heat shock protein family B (small) member 7 [Source:RGD Symbol;Acc:62021]	6.47997	7.14978	12.1118	2.57792	3.29152	3.95223	2.62089	1.39006	up
GO:0035994	response to muscle stretch	biological_process	6	0.015321	ENSRNOG00000017060	Ryr2	ryanodine receptor 2 [Source:RGD Symbol;Acc:620314]	0.285075	0.300051	1.47817	0.173643	0.049516	0.188027	5.01792	2.32709	up
GO:0035994	response to muscle stretch	biological_process	6	0.015321	ENSRNOG00000018598	Ankrd1	ankyrin repeat domain 1 [Source:RGD Symbol;Acc:61989]	52.1948	92.124	57.3024	26.6198	31.8094	17.7761	2.64577	1.40369	up
GO:0008272	sulfate transport	biological_process	9	0.015321	ENSRNOG00000030537	Slc26a11	solute carrier family 26 member 11 [Source:RGD Symbol;Acc:1306178]	6.84628	6.70089	8.1726	4.02064	3.4052	3.16109	2.05157	1.03673	up
GO:0008272	sulfate transport	biological_process	9	0.015321	ENSRNOG00000058692	Slc26a4	solute carrier family 26 member 4 [Source:RGD Symbol;Acc:3293]	4.03381	8.98354	10.6969	1.03707	0.715431	0.934049	8.82701	3.14192	up
GO:0005215	transporter activity	molecular_function	3	0.0157529	ENSRNOG00000002305	Slc15a2	solute carrier family 15 member 2 [Source:RGD Symbol;Acc:61972]	6.53357	3.24723	3.62347	12.5401	8.54652	8.59094	0.451663	-1.14668	down
GO:0005215	transporter activity	molecular_function	3	0.0157529	ENSRNOG00000011598	Slc15a1	solute carrier family 15 member 1 [Source:RGD Symbol;Acc:621736]	0.061492	0.060826	0.078949	0	0	0	670.89	9.38993	up
GO:0005215	transporter activity	molecular_function	3	0.0157529	ENSRNOG00000031249	Slco1a2	solute carrier organic anion transporter family, member 1A2 [Source:RGD Symbol;Acc:70985]	8.01298	7.7205	7.23905	17.1036	14.73	19.8891	0.444148	-1.17089	down
GO:0005215	transporter activity	molecular_function	3	0.0157529	ENSRNOG00000036984	Slco1a1	solute carrier organic anion transporter family, member 1a1 [Source:RGD Symbol;Acc:3700]	0.317929	0.628859	0.396718	0.058162	0.110115	0.019966	7.13708	2.83533	up
GO:0010811	positive regulation of cell-substrate adhesion	biological_process	7	0.0160216	ENSRNOG00000004275	Egfl6	EGF-like-domain, multiple 6 [Source:RGD Symbol;Acc:1563321]	82.0957	83.7678	48.7801	33.0382	31.1522	23.1532	2.45746	1.29717	up
GO:0010811	positive regulation of cell-substrate adhesion	biological_process	7	0.0160216	ENSRNOG00000014170	Dbn1	drebrin 1 [Source:RGD Symbol;Acc:70885]	10.9214	12.9572	10.2577	6.1132	4.51819	6.14413	2.03489	1.02495	up
GO:0010811	positive regulation of cell-substrate adhesion	biological_process	7	0.0160216	ENSRNOG00000039668	Col8a1	collagen type VIII alpha 1 chain [Source:RGD Symbol;Acc:1309361]	4.90835	6.5363	4.00716	2.58257	2.21751	1.4638	2.46681	1.30265	up
GO:0015630	microtubule cytoskeleton	cellular_component	7	0.0164337	ENSRNOG00000009334	Knstrn	kinetochore-localized astrin/SPAG5 binding protein [Source:RGD Symbol;Acc:1303240]	2.00772	2.65504	3.12539	0.916384	0.953023	0.774118	2.94612	1.55882	up
GO:0015630	microtubule cytoskeleton	cellular_component	7	0.0164337	ENSRNOG00000009339	Cenpe	centromere protein E [Source:RGD Symbol;Acc:1307115]	0.788656	1.3332	1.09251	0.574257	0.391805	0.597516	2.05577	1.03968	up
GO:0015630	microtubule cytoskeleton	cellular_component	7	0.0164337	ENSRNOG00000019100	Kif2c	kinesin family member 2C [Source:RGD Symbol;Acc:620239]	1.12797	1.74616	2.14007	0.711131	0.585884	0.897951	2.28441	1.19182	up
GO:0015630	microtubule cytoskeleton	cellular_component	7	0.0164337	ENSRNOG00000025198	Gas2l3	growth arrest-specific 2 like 3 [Source:RGD Symbol;Acc:1594151]	0.699026	1.3698	1.34355	0.469232	0.403743	0.326446	2.84503	1.50844	up
GO:0015630	microtubule cytoskeleton	cellular_component	7	0.0164337	ENSRNOG00000032410	Mtus2	microtubule associated scaffold protein 2 [Source:RGD Symbol;Acc:1562533]	0.558031	0.820144	0.926162	0.175022	0.462623	0.249959	2.59613	1.37636	up
GO:0015630	microtubule cytoskeleton	cellular_component	7	0.0164337	ENSRNOG00000048169	Tuba8	tubulin, alpha 8 [Source:RGD Symbol;Acc:1566041]	1.19674	1.13894	1.48065	0.209566	0.206161	0.258689	5.65872	2.50047	up
GO:0016787	hydrolase activity	molecular_function	4	0.0165962	ENSRNOG00000004440	Fignl1	fidgetin-like 1 [Source:RGD Symbol;Acc:1307112]	1.25489	1.98283	1.32425	0.558773	0.422531	0.693617	2.72369	1.44556	up
GO:0016787	hydrolase activity	molecular_function	4	0.0165962	ENSRNOG00000005277	Ptprv	protein tyrosine phosphatase, receptor type, V [Source:RGD Symbol;Acc:621123]	0.136187	0.466404	1.01071	0.106009	0.072467	0.13226	5.19186	2.37625	up
GO:0016787	hydrolase activity	molecular_function	4	0.0165962	ENSRNOG00000007637	Acer2	alkaline ceramidase 2 [Source:RGD Symbol;Acc:1304629]	130.856	81.491	59.5416	196.926	173.911	212.56	0.466044	-1.10146	down
GO:0016787	hydrolase activity	molecular_function	4	0.0165962	ENSRNOG00000008902	Pon1	paraoxonase 1 [Source:RGD Symbol;Acc:620062]	4.94993	3.6737	3.80655	9.75741	7.38752	8.1471	0.491466	-1.02484	down
GO:0016787	hydrolase activity	molecular_function	4	0.0165962	ENSRNOG00000009530	Uchl3	ubiquitin C-terminal hydrolase L3 [Source:RGD Symbol;Acc:1561196]	6.13125	11.4867	12.6096	3.90755	4.19954	6.06125	2.13346	1.09319	up
GO:0016787	hydrolase activity	molecular_function	4	0.0165962	ENSRNOG00000009907	Mmp8	matrix metallopeptidase 8 [Source:RGD Symbol;Acc:631408]	1.2795	0.827246	0.892774	2.57064	1.58073	4.86069	0.332834	-1.58712	down
GO:0016787	hydrolase activity	molecular_function	4	0.0165962	ENSRNOG00000010603	Gzma	granzyme A [Source:RGD Symbol;Acc:628640]	8.31047	7.27624	8.60605	18.3746	12.8989	25.6912	0.424698	-1.23549	down
GO:0016787	hydrolase activity	molecular_function	4	0.0165962	ENSRNOG00000010661	Gzmk	granzyme K [Source:RGD Symbol;Acc:68401]	10.175	6.88223	6.29562	18.5387	15.2216	32.7479	0.351126	-1.50994	down
GO:0016787	hydrolase activity	molecular_function	4	0.0165962	ENSRNOG00000010935	Cpb2	carboxypeptidase B2 [Source:RGD Symbol;Acc:71035]	0.417813	0.940398	0.194739	0	0	0	5176.5	12.3378	up
GO:0016787	hydrolase activity	molecular_function	4	0.0165962	ENSRNOG00000013215	Dctd	dCMP deaminase [Source:RGD Symbol;Acc:1359671]	1.66108	2.35547	3.79807	1.15596	1.07583	1.51322	2.08668	1.06121	up
GO:0016787	hydrolase activity	molecular_function	4	0.0165962	ENSRNOG00000013304	Arg1	arginase 1 [Source:RGD Symbol;Acc:2150]	8.35733	12.4054	14.4375	5.09255	6.15658	5.0671	2.15737	1.10928	up
GO:0016787	hydrolase activity	molecular_function	4	0.0165962	ENSRNOG00000016945	Pla2g2a	phospholipase A2 group IIA [Source:RGD Symbol;Acc:620857]	31.8882	19.843	49.1573	12.1527	19.2349	10.06	2.43412	1.2834	up
GO:0016787	hydrolase activity	molecular_function	4	0.0165962	ENSRNOG00000017477	Mmp23	matrix metallopeptidase 23 [Source:RGD Symbol;Acc:620201]	7.15585	8.3661	9.35647	2.48982	2.59284	4.01865	2.7335	1.45075	up
GO:0016787	hydrolase activity	molecular_function	4	0.0165962	ENSRNOG00000020206	Ctsd	cathepsin D [Source:RGD Symbol;Acc:621511]	548	744.981	848.372	316.023	357.412	293.272	2.2151	1.14737	up
GO:0016787	hydrolase activity	molecular_function	4	0.0165962	ENSRNOG00000020563	Cma1	chymase 1 [Source:RGD Symbol;Acc:2365]	1.06288	11.2426	14.4618	0.948545	1.00838	1.53025	7.6759	2.94034	up
GO:0016787	hydrolase activity	molecular_function	4	0.0165962	ENSRNOG00000021155	Ctsk	cathepsin K [Source:RGD Symbol;Acc:61810]	8.68873	18.433	39.2286	5.53409	8.14942	6.72412	3.25125	1.70099	up
GO:0016787	hydrolase activity	molecular_function	4	0.0165962	ENSRNOG00000030187	Mmp12	matrix metallopeptidase 12 [Source:RGD Symbol;Acc:620195]	0.8267	3.66773	18.8195	0.329763	0.456892	0.690975	15.7779	3.97983	up
GO:0016787	hydrolase activity	molecular_function	4	0.0165962	ENSRNOG00000030530	Gzmm	granzyme M [Source:RGD Symbol;Acc:620022]	15.5155	10.2956	10.456	27.0434	19.0509	36.6771	0.43816	-1.19047	down
GO:0016787	hydrolase activity	molecular_function	4	0.0165962	ENSRNOG00000034139	Lyc2	lysozyme C type 2 [Source:RGD Symbol;Acc:1593616]	97.5211	111.852	81.7107	260.831	343.193	266.941	0.334208	-1.58118	down
GO:0016787	hydrolase activity	molecular_function	4	0.0165962	ENSRNOG00000045973	Gzmb	granzyme B [Source:RGD Symbol;Acc:620018]	2.25316	1.81994	1.79573	5.58483	4.29643	10.1425	0.293093	-1.77057	down
GO:0016787	hydrolase activity	molecular_function	4	0.0165962	ENSRNOG00000046764	Tmprss11a	transmembrane serine protease 11A [Source:RGD Symbol;Acc:1596322]	0	0	9.5822	0	0	0	31940.7	14.9631	up
GO:0016787	hydrolase activity	molecular_function	4	0.0165962	ENSRNOG00000049976	Gzmbl2	Granzyme B-like 2 [Source:RGD Symbol;Acc:2320097]	1.20768	0.713789	0.784046	3.07314	1.12515	4.83558	0.299486	-1.73944	down
GO:0016787	hydrolase activity	molecular_function	4	0.0165962	ENSRNOG00000051854	Enpep	glutamyl aminopeptidase [Source:RGD Symbol;Acc:621228]	18.815	14.6776	10.9005	33.2081	30.5951	30.1322	0.472593	-1.08133	down
GO:0016787	hydrolase activity	molecular_function	4	0.0165962	ENSRNOG00000053494	Mcpt1l1	mast cell protease 1-like 1 [Source:RGD Symbol;Acc:2321286]	1.12638	24.7448	48.2037	0.458616	0.704795	1.42799	28.5849	4.83718	up
GO:0016787	hydrolase activity	molecular_function	4	0.0165962	ENSRNOG00000054212	Pde1a	phosphodiesterase 1A [Source:RGD Symbol;Acc:68329]	1.57085	2.96311	2.99337	1.33966	1.12177	1.16821	2.07385	1.05231	up
GO:0045668	negative regulation of osteoblast differentiation	biological_process	8	0.0172483	ENSRNOG00000017783	Sfrp1	secreted frizzled-related protein 1 [Source:RGD Symbol;Acc:621074]	1.68002	2.38548	4.44256	1.64961	1.21244	0.920778	2.24913	1.16937	up
GO:0045668	negative regulation of osteoblast differentiation	biological_process	8	0.0172483	ENSRNOG00000023683	Nog	noggin [Source:RGD Symbol;Acc:3183]	1.3224	2.21724	1.19676	0.464518	0.534484	0.368221	3.46425	1.79254	up
GO:0045668	negative regulation of osteoblast differentiation	biological_process	8	0.0172483	ENSRNOG00000026053	Grem1	gremlin 1, DAN family BMP antagonist [Source:RGD Symbol;Acc:2359]	0.95987	2.57523	2.25854	0.284014	0.14634	0.159551	9.82132	3.29592	up
GO:0061053	somite development	biological_process	7	0.0177016	ENSRNOG00000007765	Frzb	frizzled-related protein [Source:RGD Symbol;Acc:1311315]	3.17213	4.68488	12.4008	2.30154	1.72858	2.68979	3.01459	1.59196	up
GO:0061053	somite development	biological_process	7	0.0177016	ENSRNOG00000023683	Nog	noggin [Source:RGD Symbol;Acc:3183]	1.3224	2.21724	1.19676	0.464518	0.534484	0.368221	3.46425	1.79254	up
GO:0035640	exploration behavior	biological_process	4	0.0177016	ENSRNOG00000005561	Brinp1	BMP/retinoic acid inducible neural specific 1 [Source:RGD Symbol;Acc:708519]	0.288316	0.238766	0.291186	0.049783	0.091602	0.08736	3.57721	1.83883	up
GO:0035640	exploration behavior	biological_process	4	0.0177016	ENSRNOG00000006093	LRRTM1	leucine rich repeat transmembrane neuronal 1 [Source:RGD Symbol;Acc:1585921]	0.125443	0.154939	0.134368	0	0.01746	0	23.7543	4.57012	up
GO:2000406	positive regulation of T cell migration	biological_process	9	0.0177016	ENSRNOG00000010906	Ccl5	C-C motif chemokine ligand 5 [Source:RGD Symbol;Acc:69069]	48.3284	41.7605	33.5398	89.039	63.5136	135.101	0.429784	-1.21832	down
GO:2000406	positive regulation of T cell migration	biological_process	9	0.0177016	ENSRNOG00000034290	Ccl21	C-C motif chemokine ligand 21 [Source:RGD Symbol;Acc:1311996]	71.933	100.476	149.957	63.5991	39.5568	57.0998	2.01157	1.00832	up
GO:0050808	synapse organization	biological_process	5	0.018526	ENSRNOG00000006093	LRRTM1	leucine rich repeat transmembrane neuronal 1 [Source:RGD Symbol;Acc:1585921]	0.125443	0.154939	0.134368	0	0.01746	0	23.7543	4.57012	up
GO:0050808	synapse organization	biological_process	5	0.018526	ENSRNOG00000026704	Drp2	dystrophin related protein 2 [Source:RGD Symbol;Acc:621750]	4.13756	3.47252	6.62276	2.85545	2.30663	1.48257	2.142	1.09896	up
GO:0050808	synapse organization	biological_process	5	0.018526	ENSRNOG00000030515	Nfasc	neurofascin [Source:RGD Symbol;Acc:620911]	0.0215103	0.0189856	0.293672	0.00693821	0.00924876	0	20.6443	4.36767	up
GO:0004197	cysteine-type endopeptidase activity	molecular_function	8	0.019219	ENSRNOG00000017783	Sfrp1	secreted frizzled-related protein 1 [Source:RGD Symbol;Acc:621074]	1.68002	2.38548	4.44256	1.64961	1.21244	0.920778	2.24913	1.16937	up
GO:0004197	cysteine-type endopeptidase activity	molecular_function	8	0.019219	ENSRNOG00000021155	Ctsk	cathepsin K [Source:RGD Symbol;Acc:61810]	8.68873	18.433	39.2286	5.53409	8.14942	6.72412	3.25125	1.70099	up
GO:0004197	cysteine-type endopeptidase activity	molecular_function	8	0.019219	ENSRNOG00000037198	Usp18	ubiquitin specific peptidase 18 [Source:RGD Symbol;Acc:1359153]	13.1785	11.7285	9.52241	26.2124	16.1245	31.1509	0.468505	-1.09387	down
GO:0004197	cysteine-type endopeptidase activity	molecular_function	8	0.019219	ENSRNOG00000058664	Usp9y	ubiquitin specific peptidase 9, Y-linked [Source:RGD Symbol;Acc:9087771]	0	0	0.196688	0	0	0	655.626	9.35673	up
GO:0008270	zinc ion binding	molecular_function	8	0.0198772	ENSRNOG00000002459	Fbxo40	F-box protein 40 [Source:RGD Symbol;Acc:1309781]	0.34406	0.146446	0.98464	3.40863	1.50054	2.77833	0.191889	-2.38166	down
GO:0008270	zinc ion binding	molecular_function	8	0.0198772	ENSRNOG00000006200	St18	ST18 C2H2C-type zinc finger transcription factor [Source:RGD Symbol;Acc:708566]	0.105997	0.0468868	0.100887	0.389868	0.323476	0.228701	0.269383	-1.89227	down
GO:0008270	zinc ion binding	molecular_function	8	0.0198772	ENSRNOG00000009907	Mmp8	matrix metallopeptidase 8 [Source:RGD Symbol;Acc:631408]	1.2795	0.827246	0.892774	2.57064	1.58073	4.86069	0.332834	-1.58712	down
GO:0008270	zinc ion binding	molecular_function	8	0.0198772	ENSRNOG00000010935	Cpb2	carboxypeptidase B2 [Source:RGD Symbol;Acc:71035]	0.417813	0.940398	0.194739	0	0	0	5176.5	12.3378	up
GO:0008270	zinc ion binding	molecular_function	8	0.0198772	ENSRNOG00000011483	S100a9	S100 calcium binding protein A9 [Source:RGD Symbol;Acc:620267]	20.221	25.7548	22.6237	43.4388	35.8205	91.6187	0.401453	-1.3167	down
GO:0008270	zinc ion binding	molecular_function	8	0.0198772	ENSRNOG00000011557	S100a8	S100 calcium binding protein A8 [Source:RGD Symbol;Acc:620265]	6.86219	14.8878	7.83776	25.2298	19.4616	46.9158	0.322986	-1.63046	down
GO:0008270	zinc ion binding	molecular_function	8	0.0198772	ENSRNOG00000011989	Vat1l	vesicle amine transport 1-like [Source:RGD Symbol;Acc:1598315]	0.159545	0.131112	0.23365	0	0.013218	0	39.6661	5.30984	up
GO:0008270	zinc ion binding	molecular_function	8	0.0198772	ENSRNOG00000013215	Dctd	dCMP deaminase [Source:RGD Symbol;Acc:1359671]	1.66108	2.35547	3.79807	1.15596	1.07583	1.51322	2.08668	1.06121	up
GO:0008270	zinc ion binding	molecular_function	8	0.0198772	ENSRNOG00000015902	Cpxm2	carboxypeptidase X (M14 family), member 2 [Source:RGD Symbol;Acc:1310955]	14.1973	36.6869	13.8658	3.88967	11.2868	7.934	2.80176	1.48633	up
GO:0008270	zinc ion binding	molecular_function	8	0.0198772	ENSRNOG00000017477	Mmp23	matrix metallopeptidase 23 [Source:RGD Symbol;Acc:620201]	7.15585	8.3661	9.35647	2.48982	2.59284	4.01865	2.7335	1.45075	up
GO:0008270	zinc ion binding	molecular_function	8	0.0198772	ENSRNOG00000017606	P2rx1	purinergic receptor P2X 1 [Source:RGD Symbol;Acc:3240]	7.18568	9.04786	9.01957	19.2409	13.9678	19.8251	0.476169	-1.07045	down
GO:0008270	zinc ion binding	molecular_function	8	0.0198772	ENSRNOG00000026704	Drp2	dystrophin related protein 2 [Source:RGD Symbol;Acc:621750]	4.13756	3.47252	6.62276	2.85545	2.30663	1.48257	2.142	1.09896	up
GO:0008270	zinc ion binding	molecular_function	8	0.0198772	ENSRNOG00000030187	Mmp12	matrix metallopeptidase 12 [Source:RGD Symbol;Acc:620195]	0.8267	3.66773	18.8195	0.329763	0.456892	0.690975	15.7779	3.97983	up
GO:0008270	zinc ion binding	molecular_function	8	0.0198772	ENSRNOG00000038047	Mt1	metallothionein 1 [Source:RGD Symbol;Acc:3117]	6.48477	4.81513	5.14986	2.71678	1.77605	2.19561	2.45943	1.29833	up
GO:0008270	zinc ion binding	molecular_function	8	0.0198772	ENSRNOG00000043098	Mt2A	metallothionein 2A [Source:RGD Symbol;Acc:1592345]	22.5488	25.925	34.0743	11.7397	14.0395	14.0706	2.07148	1.05066	up
GO:0008270	zinc ion binding	molecular_function	8	0.0198772	ENSRNOG00000051854	Enpep	glutamyl aminopeptidase [Source:RGD Symbol;Acc:621228]	18.815	14.6776	10.9005	33.2081	30.5951	30.1322	0.472593	-1.08133	down
GO:0008270	zinc ion binding	molecular_function	8	0.0198772	ENSRNOG00000061484	Adamts2	ADAM metallopeptidase with thrombospondin type 1 motif, 2 [Source:RGD Symbol;Acc:1565950]	25.0103	33.9663	18.8295	11.0781	12.1949	11.6513	2.22785	1.15565	up
GO:0005523	tropomyosin binding	molecular_function	6	0.0202275	ENSRNOG00000045831	Lmod2	leiomodin-2-like [Source:RGD Symbol;Acc:6501529]	0.180558	0.343456	2.27156	0	0.04773	0.069463	23.8544	4.57619	up
GO:0005523	tropomyosin binding	molecular_function	6	0.0202275	ENSRNOG00000049639	LOC100909784	leiomodin-2-like [Source:RGD Symbol;Acc:6501529]	0.089362	0.190426	1.17025	0.00309	0.023622	0.034365	23.7411	4.56931	up
GO:1904706	negative regulation of vascular smooth muscle cell proliferation	biological_process	9	0.0202275	ENSRNOG00000014117	Hmox1	heme oxygenase 1 [Source:RGD Symbol;Acc:2806]	31.9406	70.2869	56.3487	14.3785	22.3463	16.8387	2.96053	1.56586	up
GO:1904706	negative regulation of vascular smooth muscle cell proliferation	biological_process	9	0.0202275	ENSRNOG00000027736	Cnn1	calponin 1 [Source:RGD Symbol;Acc:621883]	42.4627	60.7154	108.542	29.2818	24.2247	43.8478	2.17474	1.12084	up
GO:0035371	microtubule plus-end	cellular_component	7	0.0202275	ENSRNOG00000009334	Knstrn	kinetochore-localized astrin/SPAG5 binding protein [Source:RGD Symbol;Acc:1303240]	2.00772	2.65504	3.12539	0.916384	0.953023	0.774118	2.94612	1.55882	up
GO:0035371	microtubule plus-end	cellular_component	7	0.0202275	ENSRNOG00000019100	Kif2c	kinesin family member 2C [Source:RGD Symbol;Acc:620239]	1.12797	1.74616	2.14007	0.711131	0.585884	0.897951	2.28441	1.19182	up
GO:0015288	porin activity	molecular_function	8	0.0202275	ENSRNOG00000015410	Aspnl1	asporin-like 1 [Source:RGD Symbol;Acc:9278606]	5.47451	7.94654	9.04123	1.47136	1.33332	2.2312	4.46045	2.15719	up
GO:0015288	porin activity	molecular_function	8	0.0202275	ENSRNOG00000050431	Aspn	asporin [Source:RGD Symbol;Acc:1549776]	4.35686	7.07341	9.51473	1.40718	1.43709	1.43879	4.8902	2.28989	up
GO:0004322	ferroxidase activity	molecular_function	7	0.0202275	ENSRNOG00000031506	Ftl1	ferritin light chain 1 [Source:RGD Symbol;Acc:61813]	52.0288	52.2376	40.6289	19.4586	27.1585	22.9462	2.08293	1.05861	up
GO:0004322	ferroxidase activity	molecular_function	7	0.0202275	ENSRNOG00000033776	LOC100359668	ferritin light chain 2 [Source:RGD Symbol;Acc:2325062]	18.2062	15.2948	13.275	6.91254	7.86972	8.32579	2.02423	1.01737	up
GO:0015721	bile acid and bile salt transport	biological_process	8	0.0202275	ENSRNOG00000031249	Slco1a2	solute carrier organic anion transporter family, member 1A2 [Source:RGD Symbol;Acc:70985]	8.01298	7.7205	7.23905	17.1036	14.73	19.8891	0.444148	-1.17089	down
GO:0015721	bile acid and bile salt transport	biological_process	8	0.0202275	ENSRNOG00000036984	Slco1a1	solute carrier organic anion transporter family, member 1a1 [Source:RGD Symbol;Acc:3700]	0.317929	0.628859	0.396718	0.058162	0.110115	0.019966	7.13708	2.83533	up
GO:0008626	granzyme-mediated apoptotic signaling pathway	biological_process	6	0.0202275	ENSRNOG00000045973	Gzmb	granzyme B [Source:RGD Symbol;Acc:620018]	2.25316	1.81994	1.79573	5.58483	4.29643	10.1425	0.293093	-1.77057	down
GO:0008626	granzyme-mediated apoptotic signaling pathway	biological_process	6	0.0202275	ENSRNOG00000049976	Gzmbl2	Granzyme B-like 2 [Source:RGD Symbol;Acc:2320097]	1.20768	0.713789	0.784046	3.07314	1.12515	4.83558	0.299486	-1.73944	down
GO:0001655	urogenital system development	biological_process	6	0.0202275	ENSRNOG00000023683	Nog	noggin [Source:RGD Symbol;Acc:3183]	1.3224	2.21724	1.19676	0.464518	0.534484	0.368221	3.46425	1.79254	up
GO:0001655	urogenital system development	biological_process	6	0.0202275	ENSRNOG00000026203	Pax8	paired box 8 [Source:RGD Symbol;Acc:620434]	0.679274	0.646556	1.36295	0.21796	0.383172	0.130189	3.6766	1.87837	up
GO:0090090	negative regulation of canonical Wnt signaling pathway	biological_process	10	0.0215512	ENSRNOG00000004578	Cthrc1	collagen triple helix repeat containing 1 [Source:RGD Symbol;Acc:628801]	3.10308	5.29985	11.6251	2.15384	2.19971	2.10492	3.10105	1.63276	up
GO:0090090	negative regulation of canonical Wnt signaling pathway	biological_process	10	0.0215512	ENSRNOG00000007765	Frzb	frizzled-related protein [Source:RGD Symbol;Acc:1311315]	3.17213	4.68488	12.4008	2.30154	1.72858	2.68979	3.01459	1.59196	up
GO:0090090	negative regulation of canonical Wnt signaling pathway	biological_process	10	0.0215512	ENSRNOG00000017783	Sfrp1	secreted frizzled-related protein 1 [Source:RGD Symbol;Acc:621074]	1.68002	2.38548	4.44256	1.64961	1.21244	0.920778	2.24913	1.16937	up
GO:0090090	negative regulation of canonical Wnt signaling pathway	biological_process	10	0.0215512	ENSRNOG00000023683	Nog	noggin [Source:RGD Symbol;Acc:3183]	1.3224	2.21724	1.19676	0.464518	0.534484	0.368221	3.46425	1.79254	up
GO:0090090	negative regulation of canonical Wnt signaling pathway	biological_process	10	0.0215512	ENSRNOG00000025120	Gli1	GLI family zinc finger 1 [Source:RGD Symbol;Acc:621673]	3.07771	4.09095	3.67171	1.56395	1.68971	1.52278	2.26955	1.18241	up
GO:0010759	positive regulation of macrophage chemotaxis	biological_process	9	0.022894	ENSRNOG00000010906	Ccl5	C-C motif chemokine ligand 5 [Source:RGD Symbol;Acc:69069]	48.3284	41.7605	33.5398	89.039	63.5136	135.101	0.429784	-1.21832	down
GO:0010759	positive regulation of macrophage chemotaxis	biological_process	9	0.022894	ENSRNOG00000021294	Mstn	myostatin [Source:RGD Symbol;Acc:3115]	0.059124	1.35602	0.037337	0	0	0	4841.6	12.2413	up
GO:0090103	cochlea morphogenesis	biological_process	6	0.022894	ENSRNOG00000004578	Cthrc1	collagen triple helix repeat containing 1 [Source:RGD Symbol;Acc:628801]	3.10308	5.29985	11.6251	2.15384	2.19971	2.10492	3.10105	1.63276	up
GO:0090103	cochlea morphogenesis	biological_process	6	0.022894	ENSRNOG00000007765	Frzb	frizzled-related protein [Source:RGD Symbol;Acc:1311315]	3.17213	4.68488	12.4008	2.30154	1.72858	2.68979	3.01459	1.59196	up
GO:0009954	proximal/distal pattern formation	biological_process	6	0.022894	ENSRNOG00000025120	Gli1	GLI family zinc finger 1 [Source:RGD Symbol;Acc:621673]	3.07771	4.09095	3.67171	1.56395	1.68971	1.52278	2.26955	1.18241	up
GO:0009954	proximal/distal pattern formation	biological_process	6	0.022894	ENSRNOG00000026053	Grem1	gremlin 1, DAN family BMP antagonist [Source:RGD Symbol;Acc:2359]	0.95987	2.57523	2.25854	0.284014	0.14634	0.159551	9.82132	3.29592	up
GO:0002009	morphogenesis of an epithelium	biological_process	6	0.022894	ENSRNOG00000002640	Serpinb5	serpin family B member 5 [Source:RGD Symbol;Acc:69342]	0	0	0.922211	0	0	0	3074.04	11.5859	up
GO:0002009	morphogenesis of an epithelium	biological_process	6	0.022894	ENSRNOG00000026371	Krt17	keratin 17 [Source:RGD Symbol;Acc:1303181]	0.712225	1.13969	8.88744	0.287772	0.439651	0.911312	6.55344	2.71225	up
GO:0019001	guanyl nucleotide binding	molecular_function	7	0.022894	ENSRNOG00000005268	Gnat3	G protein subunit alpha transducin 3 [Source:RGD Symbol;Acc:727817]	1.25921	0.481596	0.306878	3.70113	2.49755	4.15072	0.197855	-2.33748	down
GO:0019001	guanyl nucleotide binding	molecular_function	7	0.022894	ENSRNOG00000019296	Gnat2	G protein subunit alpha transducin 2 [Source:RGD Symbol;Acc:1309514]	1.54464	1.73817	1.48	3.37445	2.70398	3.67333	0.488405	-1.03385	down
GO:0048646	anatomical structure formation involved in morphogenesis	biological_process	4	0.022894	ENSRNOG00000010905	Dlx5	distal-less homeobox 5 [Source:RGD Symbol;Acc:2506]	0.333893	0.067122	0.257194	0	0	0	2194.03	11.0994	up
GO:0048646	anatomical structure formation involved in morphogenesis	biological_process	4	0.022894	ENSRNOG00000023683	Nog	noggin [Source:RGD Symbol;Acc:3183]	1.3224	2.21724	1.19676	0.464518	0.534484	0.368221	3.46425	1.79254	up
GO:0045109	intermediate filament organization	biological_process	8	0.022894	ENSRNOG00000026371	Krt17	keratin 17 [Source:RGD Symbol;Acc:1303181]	0.712225	1.13969	8.88744	0.287772	0.439651	0.911312	6.55344	2.71225	up
GO:0045109	intermediate filament organization	biological_process	8	0.022894	ENSRNOG00000056746	Tchh	trichohyalin [Source:RGD Symbol;Acc:1309635]	4.07548	3.16984	1.73282	1.19183	1.02438	0.811988	2.96485	1.56796	up
GO:0005887	integral component of plasma membrane	cellular_component	6	0.0230819	ENSRNOG00000006639	Scn9a	sodium voltage-gated channel alpha subunit 9 [Source:RGD Symbol;Acc:69368]	0.00415055	0.00708024	0.083853	0	0	0	316.946	8.30809	up
GO:0005887	integral component of plasma membrane	cellular_component	6	0.0230819	ENSRNOG00000008816	Gpnmb	glycoprotein nmb [Source:RGD Symbol;Acc:71008]	193.456	246.629	303.418	84.0387	88.9556	65.1415	3.12218	1.64255	up
GO:0005887	integral component of plasma membrane	cellular_component	6	0.0230819	ENSRNOG00000008847	Gja3	gap junction protein, alpha 3 [Source:RGD Symbol;Acc:621820]	0.349941	1.33511	0.943374	0.245536	0.233594	0.190604	3.92459	1.97254	up
GO:0005887	integral component of plasma membrane	cellular_component	6	0.0230819	ENSRNOG00000010268	Vom2r44	vomeronasal 2 receptor 44 [Source:RGD Symbol;Acc:708515]	0.097324	0.555759	0.388232	0.070268	0.102233	0.085323	4.03886	2.01395	up
GO:0005887	integral component of plasma membrane	cellular_component	6	0.0230819	ENSRNOG00000017606	P2rx1	purinergic receptor P2X 1 [Source:RGD Symbol;Acc:3240]	7.18568	9.04786	9.01957	19.2409	13.9678	19.8251	0.476169	-1.07045	down
GO:0005887	integral component of plasma membrane	cellular_component	6	0.0230819	ENSRNOG00000022067	Tlr5	toll-like receptor 5 [Source:RGD Symbol;Acc:631351]	3.79088	2.48157	3.94515	1.49858	1.60221	1.77419	2.09592	1.06759	up
GO:0005887	integral component of plasma membrane	cellular_component	6	0.0230819	ENSRNOG00000030515	Nfasc	neurofascin [Source:RGD Symbol;Acc:620911]	0.0215103	0.0189856	0.293672	0.00693821	0.00924876	0	20.6443	4.36767	up
GO:0005887	integral component of plasma membrane	cellular_component	6	0.0230819	ENSRNOG00000030537	Slc26a11	solute carrier family 26 member 11 [Source:RGD Symbol;Acc:1306178]	6.84628	6.70089	8.1726	4.02064	3.4052	3.16109	2.05157	1.03673	up
GO:0005887	integral component of plasma membrane	cellular_component	6	0.0230819	ENSRNOG00000031249	Slco1a2	solute carrier organic anion transporter family, member 1A2 [Source:RGD Symbol;Acc:70985]	8.01298	7.7205	7.23905	17.1036	14.73	19.8891	0.444148	-1.17089	down
GO:0005887	integral component of plasma membrane	cellular_component	6	0.0230819	ENSRNOG00000031536	Syndig1	synapse differentiation inducing 1 [Source:RGD Symbol;Acc:1310753]	3.11116	2.77016	1.96867	5.58928	6.40608	5.16542	0.457438	-1.12835	down
GO:0005887	integral component of plasma membrane	cellular_component	6	0.0230819	ENSRNOG00000036984	Slco1a1	solute carrier organic anion transporter family, member 1a1 [Source:RGD Symbol;Acc:3700]	0.317929	0.628859	0.396718	0.058162	0.110115	0.019966	7.13708	2.83533	up
GO:0005887	integral component of plasma membrane	cellular_component	6	0.0230819	ENSRNOG00000039390	Slc37a2	solute carrier family 37 member 2 [Source:RGD Symbol;Acc:1564160]	1.97428	2.51988	3.94794	1.16326	1.15279	1.37104	2.28964	1.19512	up
GO:0005887	integral component of plasma membrane	cellular_component	6	0.0230819	ENSRNOG00000048145	Sstr1	somatostatin receptor 1 [Source:RGD Symbol;Acc:3762]	0.23218	0.180356	0.12633	0.504885	0.640927	0.601976	0.308313	-1.69753	down
GO:0005887	integral component of plasma membrane	cellular_component	6	0.0230819	ENSRNOG00000052803	Klri1	killer cell lectin-like receptor family I member 1 [Source:RGD Symbol;Acc:1359344]	1.92676	2.04797	2.17747	4.23308	3.18298	6.56409	0.440067	-1.18421	down
GO:0005887	integral component of plasma membrane	cellular_component	6	0.0230819	ENSRNOG00000054360	Tspan11	tetraspanin 11 [Source:RGD Symbol;Acc:1305424]	6.07758	5.91817	4.9053	2.45225	2.02185	1.79301	2.69678	1.43124	up
GO:0005887	integral component of plasma membrane	cellular_component	6	0.0230819	ENSRNOG00000057335	Clec1b	C-type lectin domain family 1, member B [Source:RGD Symbol;Acc:1563517]	1.21217	2.20758	0.914233	3.16015	4.82792	4.73455	0.340652	-1.55363	down
GO:0005887	integral component of plasma membrane	cellular_component	6	0.0230819	ENSRNOG00000058692	Slc26a4	solute carrier family 26 member 4 [Source:RGD Symbol;Acc:3293]	4.03381	8.98354	10.6969	1.03707	0.715431	0.934049	8.82701	3.14192	up
GO:0005887	integral component of plasma membrane	cellular_component	6	0.0230819	ENSRNOG00000058714	Klre1	killer cell lectin-like receptor, family E, member 1 [Source:RGD Symbol;Acc:727903]	1.41711	1.79425	1.54913	5.00401	2.61277	6.33873	0.341119	-1.55165	down
GO:0005887	integral component of plasma membrane	cellular_component	6	0.0230819	ENSRNOG00000059362	Has3	hyaluronan synthase 3 [Source:RGD Symbol;Acc:628656]	0.551376	0.941067	0.708262	0.367742	0.312288	0.140207	2.68301	1.42385	up
GO:0002250	adaptive immune response	biological_process	5	0.0231221	ENSRNOG00000006263	Sh2d1a	SH2 domain containing 1A [Source:RGD Symbol;Acc:1562408]	0.762223	0.828636	1.31519	3.17378	2.3662	3.14758	0.334508	-1.57989	down
GO:0002250	adaptive immune response	biological_process	5	0.0231221	ENSRNOG00000013304	Arg1	arginase 1 [Source:RGD Symbol;Acc:2150]	8.35733	12.4054	14.4375	5.09255	6.15658	5.0671	2.15737	1.10928	up
GO:0002250	adaptive immune response	biological_process	5	0.0231221	ENSRNOG00000021546	Sit1	signaling threshold regulating transmembrane adaptor 1 [Source:RGD Symbol;Acc:1559919]	1.07776	0.720659	1.29333	2.51028	1.88185	3.02458	0.416862	-1.26236	down
GO:0002250	adaptive immune response	biological_process	5	0.0231221	ENSRNOG00000025925	Txk	TXK tyrosine kinase [Source:RGD Symbol;Acc:1306481]	1.86157	1.7651	1.7296	3.59851	2.5356	5.25992	0.470094	-1.08898	down
GO:0007605	sensory perception of sound	biological_process	8	0.0231337	ENSRNOG00000003897	Col1a1	collagen type I alpha 1 chain [Source:RGD Symbol;Acc:61817]	126.27	249.911	273.591	58.1167	63.4283	51.677	3.75109	1.90731	up
GO:0007605	sensory perception of sound	biological_process	8	0.0231337	ENSRNOG00000004177	Myo1a	myosin IA [Source:RGD Symbol;Acc:3135]	0.621574	0.513884	0.299639	1.36739	1.14678	1.28165	0.378073	-1.40326	down
GO:0007605	sensory perception of sound	biological_process	8	0.0231337	ENSRNOG00000012442	Cemip	cell migration inducing hyaluronidase [Source:RGD Symbol;Acc:1305254]	4.17147	5.86685	2.59443	1.03326	1.02633	1.30613	3.75336	1.90818	up
GO:0007605	sensory perception of sound	biological_process	8	0.0231337	ENSRNOG00000013641	Myo7a	myosin VIIA [Source:RGD Symbol;Acc:628830]	1.16161	0.900417	1.40572	0.61878	0.548688	0.42358	2.17954	1.12402	up
GO:0007605	sensory perception of sound	biological_process	8	0.0231337	ENSRNOG00000023148	Col11a1	collagen type XI alpha 1 chain [Source:RGD Symbol;Acc:2372]	0.411087	0.52551	0.885577	0.224042	0.278554	0.247892	2.42799	1.27976	up
GO:0030514	negative regulation of BMP signaling pathway	biological_process	11	0.0241492	ENSRNOG00000017783	Sfrp1	secreted frizzled-related protein 1 [Source:RGD Symbol;Acc:621074]	1.68002	2.38548	4.44256	1.64961	1.21244	0.920778	2.24913	1.16937	up
GO:0030514	negative regulation of BMP signaling pathway	biological_process	11	0.0241492	ENSRNOG00000023683	Nog	noggin [Source:RGD Symbol;Acc:3183]	1.3224	2.21724	1.19676	0.464518	0.534484	0.368221	3.46425	1.79254	up
GO:0030514	negative regulation of BMP signaling pathway	biological_process	11	0.0241492	ENSRNOG00000026053	Grem1	gremlin 1, DAN family BMP antagonist [Source:RGD Symbol;Acc:2359]	0.95987	2.57523	2.25854	0.284014	0.14634	0.159551	9.82132	3.29592	up
GO:0010942	positive regulation of cell death	biological_process	7	0.0241492	ENSRNOG00000007637	Acer2	alkaline ceramidase 2 [Source:RGD Symbol;Acc:1304629]	130.856	81.491	59.5416	196.926	173.911	212.56	0.466044	-1.10146	down
GO:0010942	positive regulation of cell death	biological_process	7	0.0241492	ENSRNOG00000045973	Gzmb	granzyme B [Source:RGD Symbol;Acc:620018]	2.25316	1.81994	1.79573	5.58483	4.29643	10.1425	0.293093	-1.77057	down
GO:0010942	positive regulation of cell death	biological_process	7	0.0241492	ENSRNOG00000049976	Gzmbl2	Granzyme B-like 2 [Source:RGD Symbol;Acc:2320097]	1.20768	0.713789	0.784046	3.07314	1.12515	4.83558	0.299486	-1.73944	down
GO:0009612	response to mechanical stimulus	biological_process	5	0.0252413	ENSRNOG00000003897	Col1a1	collagen type I alpha 1 chain [Source:RGD Symbol;Acc:61817]	126.27	249.911	273.591	58.1167	63.4283	51.677	3.75109	1.90731	up
GO:0009612	response to mechanical stimulus	biological_process	5	0.0252413	ENSRNOG00000017786	Acta1	actin, alpha 1, skeletal muscle [Source:RGD Symbol;Acc:2025]	2.06127	3.95623	4.72239	0.202559	1.39766	0.697384	4.67439	2.22478	up
GO:0009612	response to mechanical stimulus	biological_process	5	0.0252413	ENSRNOG00000021201	Txnip	thioredoxin interacting protein [Source:RGD Symbol;Acc:620886]	381.684	279.835	482.899	706.409	874.051	787.516	0.483289	-1.04904	down
GO:0009612	response to mechanical stimulus	biological_process	5	0.0252413	ENSRNOG00000053272	Chi3l1	chitinase 3 like 1 [Source:RGD Symbol;Acc:620874]	78.1203	93.0092	101.602	41.6996	35.3419	56.541	2.04167	1.02975	up
GO:0045111	intermediate filament cytoskeleton	cellular_component	7	0.0256833	ENSRNOG00000007509	Slc1a6	solute carrier family 1 member 6 [Source:RGD Symbol;Acc:620340]	0.044448	0.022178	1.5478	0	0	0	5381.42	12.3938	up
GO:0045111	intermediate filament cytoskeleton	cellular_component	7	0.0256833	ENSRNOG00000011557	S100a8	S100 calcium binding protein A8 [Source:RGD Symbol;Acc:620265]	6.86219	14.8878	7.83776	25.2298	19.4616	46.9158	0.322986	-1.63046	down
GO:0045111	intermediate filament cytoskeleton	cellular_component	7	0.0256833	ENSRNOG00000026371	Krt17	keratin 17 [Source:RGD Symbol;Acc:1303181]	0.712225	1.13969	8.88744	0.287772	0.439651	0.911312	6.55344	2.71225	up
GO:0044389	ubiquitin-like protein ligase binding	molecular_function	6	0.0256965	ENSRNOG00000015131	Ube2c	ubiquitin-conjugating enzyme E2C [Source:RGD Symbol;Acc:1305382]	1.0802	2.16214	1.89892	0.453385	0.352019	0.668492	3.48821	1.80249	up
GO:0044389	ubiquitin-like protein ligase binding	molecular_function	6	0.0256965	ENSRNOG00000019587	Ptprn	protein tyrosine phosphatase, receptor type, N [Source:RGD Symbol;Acc:620777]	0.404913	0.311202	1.36381	0.178802	0.024688	0.090892	7.0654	2.82077	up
GO:0015301	anion:anion antiporter activity	molecular_function	8	0.0256965	ENSRNOG00000030537	Slc26a11	solute carrier family 26 member 11 [Source:RGD Symbol;Acc:1306178]	6.84628	6.70089	8.1726	4.02064	3.4052	3.16109	2.05157	1.03673	up
GO:0015301	anion:anion antiporter activity	molecular_function	8	0.0256965	ENSRNOG00000058692	Slc26a4	solute carrier family 26 member 4 [Source:RGD Symbol;Acc:3293]	4.03381	8.98354	10.6969	1.03707	0.715431	0.934049	8.82701	3.14192	up
GO:0043011	myeloid dendritic cell differentiation	biological_process	8	0.0256965	ENSRNOG00000000768	Ubd	ubiquitin D [Source:RGD Symbol;Acc:69418]	0.852352	1.11817	10.1361	0.399383	0.741507	0.752221	6.39509	2.67697	up
GO:0043011	myeloid dendritic cell differentiation	biological_process	8	0.0256965	ENSRNOG00000045595	Tnfsf9	TNF superfamily member 9 [Source:RGD Symbol;Acc:727974]	1.37669	1.19038	1.76987	0.488094	0.275907	0.330177	3.96364	1.98683	up
GO:0006915	apoptotic process	biological_process	6	0.0257855	ENSRNOG00000002978	Faslg	Fas ligand [Source:RGD Symbol;Acc:3880]	0.709471	0.473535	1.27202	2.10948	1.83509	3.11962	0.347531	-1.52479	down
GO:0006915	apoptotic process	biological_process	6	0.0257855	ENSRNOG00000011557	S100a8	S100 calcium binding protein A8 [Source:RGD Symbol;Acc:620265]	6.86219	14.8878	7.83776	25.2298	19.4616	46.9158	0.322986	-1.63046	down
GO:0006915	apoptotic process	biological_process	6	0.0257855	ENSRNOG00000013973	Lcn2	lipocalin 2 [Source:RGD Symbol;Acc:69408]	399.193	738.611	424.407	107.199	115.007	143.758	4.26876	2.09382	up
GO:0006915	apoptotic process	biological_process	6	0.0257855	ENSRNOG00000014117	Hmox1	heme oxygenase 1 [Source:RGD Symbol;Acc:2806]	31.9406	70.2869	56.3487	14.3785	22.3463	16.8387	2.96053	1.56586	up
GO:0006915	apoptotic process	biological_process	6	0.0257855	ENSRNOG00000015408	Vil1	villin 1 [Source:RGD Symbol;Acc:1307048]	0.852	0.23051	0.408527	1.89595	1.63924	3.09661	0.224832	-2.15308	down
GO:0006915	apoptotic process	biological_process	6	0.0257855	ENSRNOG00000017606	P2rx1	purinergic receptor P2X 1 [Source:RGD Symbol;Acc:3240]	7.18568	9.04786	9.01957	19.2409	13.9678	19.8251	0.476169	-1.07045	down
GO:0006915	apoptotic process	biological_process	6	0.0257855	ENSRNOG00000026053	Grem1	gremlin 1, DAN family BMP antagonist [Source:RGD Symbol;Acc:2359]	0.95987	2.57523	2.25854	0.284014	0.14634	0.159551	9.82132	3.29592	up
GO:0006915	apoptotic process	biological_process	6	0.0257855	ENSRNOG00000045973	Gzmb	granzyme B [Source:RGD Symbol;Acc:620018]	2.25316	1.81994	1.79573	5.58483	4.29643	10.1425	0.293093	-1.77057	down
GO:0006915	apoptotic process	biological_process	6	0.0257855	ENSRNOG00000049976	Gzmbl2	Granzyme B-like 2 [Source:RGD Symbol;Acc:2320097]	1.20768	0.713789	0.784046	3.07314	1.12515	4.83558	0.299486	-1.73944	down
GO:0006915	apoptotic process	biological_process	6	0.0257855	ENSRNOG00000053272	Chi3l1	chitinase 3 like 1 [Source:RGD Symbol;Acc:620874]	78.1203	93.0092	101.602	41.6996	35.3419	56.541	2.04167	1.02975	up
GO:0008201	heparin binding	molecular_function	6	0.0265198	ENSRNOG00000008816	Gpnmb	glycoprotein nmb [Source:RGD Symbol;Acc:71008]	193.456	246.629	303.418	84.0387	88.9556	65.1415	3.12218	1.64255	up
GO:0008201	heparin binding	molecular_function	6	0.0265198	ENSRNOG00000015461	Serpine2	serpin family E member 2 [Source:RGD Symbol;Acc:3748]	21.8704	32.5856	37.2124	17.0684	13.4899	15.117	2.00695	1.00501	up
GO:0008201	heparin binding	molecular_function	6	0.0265198	ENSRNOG00000017783	Sfrp1	secreted frizzled-related protein 1 [Source:RGD Symbol;Acc:621074]	1.68002	2.38548	4.44256	1.64961	1.21244	0.920778	2.24913	1.16937	up
GO:0008201	heparin binding	molecular_function	6	0.0265198	ENSRNOG00000021294	Mstn	myostatin [Source:RGD Symbol;Acc:3115]	0.059124	1.35602	0.037337	0	0	0	4841.6	12.2413	up
GO:0008201	heparin binding	molecular_function	6	0.0265198	ENSRNOG00000023148	Col11a1	collagen type XI alpha 1 chain [Source:RGD Symbol;Acc:2372]	0.411087	0.52551	0.885577	0.224042	0.278554	0.247892	2.42799	1.27976	up
GO:0008217	regulation of blood pressure	biological_process	5	0.0272685	ENSRNOG00000008176	Nppa	natriuretic peptide A [Source:RGD Symbol;Acc:3193]	0	0	4.77912	0	0	0	15930.4	13.9595	up
GO:0008217	regulation of blood pressure	biological_process	5	0.0272685	ENSRNOG00000014117	Hmox1	heme oxygenase 1 [Source:RGD Symbol;Acc:2806]	31.9406	70.2869	56.3487	14.3785	22.3463	16.8387	2.96053	1.56586	up
GO:0008217	regulation of blood pressure	biological_process	5	0.0272685	ENSRNOG00000017606	P2rx1	purinergic receptor P2X 1 [Source:RGD Symbol;Acc:3240]	7.18568	9.04786	9.01957	19.2409	13.9678	19.8251	0.476169	-1.07045	down
GO:0004867	serine-type endopeptidase inhibitor activity	molecular_function	8	0.0274739	ENSRNOG00000002640	Serpinb5	serpin family B member 5 [Source:RGD Symbol;Acc:69342]	0	0	0.922211	0	0	0	3074.04	11.5859	up
GO:0004867	serine-type endopeptidase inhibitor activity	molecular_function	8	0.0274739	ENSRNOG00000002831	Wfikkn2	WAP, follistatin/kazal, immunoglobulin, kunitz and netrin domain containing 2 [Source:RGD Symbol;Acc:1305361]	0.67908	0.636644	0.827013	0.12076	0.21243	0.113778	4.79394	2.26121	up
GO:0004867	serine-type endopeptidase inhibitor activity	molecular_function	8	0.0274739	ENSRNOG00000015461	Serpine2	serpin family E member 2 [Source:RGD Symbol;Acc:3748]	21.8704	32.5856	37.2124	17.0684	13.4899	15.117	2.00695	1.00501	up
GO:0004867	serine-type endopeptidase inhibitor activity	molecular_function	8	0.0274739	ENSRNOG00000017381	Itih4	inter-alpha-trypsin inhibitor heavy chain 4 [Source:RGD Symbol;Acc:70881]	1.36066	3.25426	1.61958	0.428099	0.510321	0.295756	5.05155	2.33673	up
GO:0005516	calmodulin binding	molecular_function	5	0.0283253	ENSRNOG00000006426	Syt1	synaptotagmin 1 [Source:RGD Symbol;Acc:3803]	0.535581	0.254328	0.726439	1.20032	1.83951	1.33849	0.346332	-1.52977	down
GO:0005516	calmodulin binding	molecular_function	5	0.0283253	ENSRNOG00000013641	Myo7a	myosin VIIA [Source:RGD Symbol;Acc:628830]	1.16161	0.900417	1.40572	0.61878	0.548688	0.42358	2.17954	1.12402	up
GO:0005516	calmodulin binding	molecular_function	5	0.0283253	ENSRNOG00000017060	Ryr2	ryanodine receptor 2 [Source:RGD Symbol;Acc:620314]	0.285075	0.300051	1.47817	0.173643	0.049516	0.188027	5.01792	2.32709	up
GO:0005516	calmodulin binding	molecular_function	5	0.0283253	ENSRNOG00000027736	Cnn1	calponin 1 [Source:RGD Symbol;Acc:621883]	42.4627	60.7154	108.542	29.2818	24.2247	43.8478	2.17474	1.12084	up
GO:0005516	calmodulin binding	molecular_function	5	0.0283253	ENSRNOG00000027894	Iqgap3	IQ motif containing GTPase activating protein 3 [Source:RGD Symbol;Acc:1305951]	1.60168	2.19219	2.04078	0.916376	0.778468	1.20012	2.01545	1.0111	up
GO:0019228	neuronal action potential	biological_process	7	0.0286302	ENSRNOG00000006639	Scn9a	sodium voltage-gated channel alpha subunit 9 [Source:RGD Symbol;Acc:69368]	0.00415055	0.00708024	0.083853	0	0	0	316.946	8.30809	up
GO:0019228	neuronal action potential	biological_process	7	0.0286302	ENSRNOG00000017606	P2rx1	purinergic receptor P2X 1 [Source:RGD Symbol;Acc:3240]	7.18568	9.04786	9.01957	19.2409	13.9678	19.8251	0.476169	-1.07045	down
GO:0005229	intracellular calcium activated chloride channel activity	molecular_function	7	0.0286302	ENSRNOG00000015972	Ano5	anoctamin 5 [Source:MGI Symbol;Acc:MGI:3576659]	0.209885	0.228624	0.205741	0.565561	0.631479	0.538105	0.371295	-1.42936	down
GO:0005229	intracellular calcium activated chloride channel activity	molecular_function	7	0.0286302	ENSRNOG00000024578	Ttyh2	tweety family member 2 [Source:RGD Symbol;Acc:1562969]	7.71331	7.85453	7.28898	3.37533	3.38135	3.32008	2.26827	1.18159	up
GO:0030658	transport vesicle membrane	cellular_component	7	0.0286302	ENSRNOG00000006426	Syt1	synaptotagmin 1 [Source:RGD Symbol;Acc:3803]	0.535581	0.254328	0.726439	1.20032	1.83951	1.33849	0.346332	-1.52977	down
GO:0030658	transport vesicle membrane	cellular_component	7	0.0286302	ENSRNOG00000019587	Ptprn	protein tyrosine phosphatase, receptor type, N [Source:RGD Symbol;Acc:620777]	0.404913	0.311202	1.36381	0.178802	0.024688	0.090892	7.0654	2.82077	up
GO:0071346	cellular response to interferon-gamma	biological_process	8	0.028633	ENSRNOG00000010906	Ccl5	C-C motif chemokine ligand 5 [Source:RGD Symbol;Acc:69069]	48.3284	41.7605	33.5398	89.039	63.5136	135.101	0.429784	-1.21832	down
GO:0071346	cellular response to interferon-gamma	biological_process	8	0.028633	ENSRNOG00000028548	Ccl9	chemokine (C-C motif) ligand 9 [Source:RGD Symbol;Acc:1310563]	31.354	22.2453	32.1143	12.7972	13.0843	8.17364	2.5169	1.33165	up
GO:0071346	cellular response to interferon-gamma	biological_process	8	0.028633	ENSRNOG00000031162	Ccl24	C-C motif chemokine ligand 24 [Source:RGD Symbol;Acc:1310245]	2.95267	4.5172	2.6358	1.47836	0.899061	1.85835	2.38579	1.25447	up
GO:0071346	cellular response to interferon-gamma	biological_process	8	0.028633	ENSRNOG00000034290	Ccl21	C-C motif chemokine ligand 21 [Source:RGD Symbol;Acc:1311996]	71.933	100.476	149.957	63.5991	39.5568	57.0998	2.01157	1.00832	up
GO:0005623	cell	cellular_component	3	0.0288954	ENSRNOG00000017060	Ryr2	ryanodine receptor 2 [Source:RGD Symbol;Acc:620314]	0.285075	0.300051	1.47817	0.173643	0.049516	0.188027	5.01792	2.32709	up
GO:0005623	cell	cellular_component	3	0.0288954	ENSRNOG00000017873	Sct	secretin [Source:RGD Symbol;Acc:3643]	1.23791	1.93048	2.4561	0.102153	0.550348	0.362674	5.54041	2.46999	up
GO:0005623	cell	cellular_component	3	0.0288954	ENSRNOG00000022533	Micall2	MICAL-like 2 [Source:RGD Symbol;Acc:1307875]	2.02891	2.05633	4.06871	1.46972	0.930644	1.29824	2.2046	1.14052	up
GO:0005623	cell	cellular_component	3	0.0288954	ENSRNOG00000026235	Hk3	hexokinase 3 [Source:RGD Symbol;Acc:2798]	4.56077	6.16295	7.19107	3.31099	2.99085	2.64764	2.00177	1.00128	up
GO:0005623	cell	cellular_component	3	0.0288954	ENSRNOG00000034290	Ccl21	C-C motif chemokine ligand 21 [Source:RGD Symbol;Acc:1311996]	71.933	100.476	149.957	63.5991	39.5568	57.0998	2.01157	1.00832	up
GO:0005623	cell	cellular_component	3	0.0288954	ENSRNOG00000037563	Cd68	Cd68 molecule [Source:RGD Symbol;Acc:1305970]	75.5859	71.5358	91.732	32.3381	37.7388	35.3836	2.26486	1.17942	up
GO:0051591	response to cAMP	biological_process	8	0.0289048	ENSRNOG00000003897	Col1a1	collagen type I alpha 1 chain [Source:RGD Symbol;Acc:61817]	126.27	249.911	273.591	58.1167	63.4283	51.677	3.75109	1.90731	up
GO:0051591	response to cAMP	biological_process	8	0.0289048	ENSRNOG00000013704	Cps1	carbamoyl-phosphate synthase 1 [Source:RGD Symbol;Acc:2395]	0.0296366	0.0318274	0.0321218	0	0	0	311.953	8.28518	up
GO:0051591	response to cAMP	biological_process	8	0.0289048	ENSRNOG00000019587	Ptprn	protein tyrosine phosphatase, receptor type, N [Source:RGD Symbol;Acc:620777]	0.404913	0.311202	1.36381	0.178802	0.024688	0.090892	7.0654	2.82077	up
GO:0042493	response to drug	biological_process	5	0.029205	ENSRNOG00000003897	Col1a1	collagen type I alpha 1 chain [Source:RGD Symbol;Acc:61817]	126.27	249.911	273.591	58.1167	63.4283	51.677	3.75109	1.90731	up
GO:0042493	response to drug	biological_process	5	0.029205	ENSRNOG00000010454	Ccno	cyclin O [Source:RGD Symbol;Acc:1565217]	1.43171	1.77816	6.99599	1.16909	0.673202	0.950255	3.65468	1.86975	up
GO:0042493	response to drug	biological_process	5	0.029205	ENSRNOG00000010935	Cpb2	carboxypeptidase B2 [Source:RGD Symbol;Acc:71035]	0.417813	0.940398	0.194739	0	0	0	5176.5	12.3378	up
GO:0042493	response to drug	biological_process	5	0.029205	ENSRNOG00000012458	Cyp2e1	cytochrome P450, family 2, subfamily e, polypeptide 1 [Source:RGD Symbol;Acc:2475]	5.70974	4.74285	4.83838	17.7295	21.6301	20.9411	0.253579	-1.97949	down
GO:0042493	response to drug	biological_process	5	0.029205	ENSRNOG00000013304	Arg1	arginase 1 [Source:RGD Symbol;Acc:2150]	8.35733	12.4054	14.4375	5.09255	6.15658	5.0671	2.15737	1.10928	up
GO:0042493	response to drug	biological_process	5	0.029205	ENSRNOG00000013704	Cps1	carbamoyl-phosphate synthase 1 [Source:RGD Symbol;Acc:2395]	0.0296366	0.0318274	0.0321218	0	0	0	311.953	8.28518	up
GO:0042493	response to drug	biological_process	5	0.029205	ENSRNOG00000013973	Lcn2	lipocalin 2 [Source:RGD Symbol;Acc:69408]	399.193	738.611	424.407	107.199	115.007	143.758	4.26876	2.09382	up
GO:0042493	response to drug	biological_process	5	0.029205	ENSRNOG00000014170	Dbn1	drebrin 1 [Source:RGD Symbol;Acc:70885]	10.9214	12.9572	10.2577	6.1132	4.51819	6.14413	2.03489	1.02495	up
GO:0042493	response to drug	biological_process	5	0.029205	ENSRNOG00000017783	Sfrp1	secreted frizzled-related protein 1 [Source:RGD Symbol;Acc:621074]	1.68002	2.38548	4.44256	1.64961	1.21244	0.920778	2.24913	1.16937	up
GO:0042493	response to drug	biological_process	5	0.029205	ENSRNOG00000021201	Txnip	thioredoxin interacting protein [Source:RGD Symbol;Acc:620886]	381.684	279.835	482.899	706.409	874.051	787.516	0.483289	-1.04904	down
GO:0002933	lipid hydroxylation	biological_process	8	0.0294174	ENSRNOG00000012458	Cyp2e1	cytochrome P450, family 2, subfamily e, polypeptide 1 [Source:RGD Symbol;Acc:2475]	5.70974	4.74285	4.83838	17.7295	21.6301	20.9411	0.253579	-1.97949	down
GO:0010721	negative regulation of cell development	biological_process	8	0.0294174	ENSRNOG00000007765	Frzb	frizzled-related protein [Source:RGD Symbol;Acc:1311315]	3.17213	4.68488	12.4008	2.30154	1.72858	2.68979	3.01459	1.59196	up
GO:2000594	positive regulation of metanephric DCT cell differentiation	biological_process	8	0.0294174	ENSRNOG00000026203	Pax8	paired box 8 [Source:RGD Symbol;Acc:620434]	0.679274	0.646556	1.36295	0.21796	0.383172	0.130189	3.6766	1.87837	up
GO:0003220	left ventricular cardiac muscle tissue morphogenesis	biological_process	9	0.0294174	ENSRNOG00000017060	Ryr2	ryanodine receptor 2 [Source:RGD Symbol;Acc:620314]	0.285075	0.300051	1.47817	0.173643	0.049516	0.188027	5.01792	2.32709	up
GO:0071351	cellular response to interleukin-18	biological_process	8	0.0294174	ENSRNOG00000054218	Il18rap	interleukin 18 receptor accessory protein [Source:RGD Symbol;Acc:727867]	0.952382	0.874742	0.928804	2.62494	1.36523	2.00221	0.459906	-1.12059	down
GO:0051904	pigment granule transport	biological_process	6	0.0294174	ENSRNOG00000013641	Myo7a	myosin VIIA [Source:RGD Symbol;Acc:628830]	1.16161	0.900417	1.40572	0.61878	0.548688	0.42358	2.17954	1.12402	up
GO:0060401	cytosolic calcium ion transport	biological_process	11	0.0294174	ENSRNOG00000017060	Ryr2	ryanodine receptor 2 [Source:RGD Symbol;Acc:620314]	0.285075	0.300051	1.47817	0.173643	0.049516	0.188027	5.01792	2.32709	up
GO:0055081	anion homeostasis	biological_process	8	0.0294174	ENSRNOG00000013704	Cps1	carbamoyl-phosphate synthase 1 [Source:RGD Symbol;Acc:2395]	0.0296366	0.0318274	0.0321218	0	0	0	311.953	8.28518	up
GO:0004088	carbamoyl-phosphate synthase (glutamine-hydrolyzing) activity	molecular_function	7	0.0294174	ENSRNOG00000013704	Cps1	carbamoyl-phosphate synthase 1 [Source:RGD Symbol;Acc:2395]	0.0296366	0.0318274	0.0321218	0	0	0	311.953	8.28518	up
GO:0010848	regulation of chromatin disassembly	biological_process	11	0.0294174	ENSRNOG00000007574	Padi2	peptidyl arginine deiminase 2 [Source:RGD Symbol;Acc:3288]	1.05408	0.426038	0.672806	1.90207	1.87646	2.07766	0.367632	-1.44367	down
GO:0070965	positive regulation of neutrophil mediated killing of fungus	biological_process	9	0.0294174	ENSRNOG00000013304	Arg1	arginase 1 [Source:RGD Symbol;Acc:2150]	8.35733	12.4054	14.4375	5.09255	6.15658	5.0671	2.15737	1.10928	up
GO:0090327	negative regulation of locomotion involved in locomotory behavior	biological_process	7	0.0294174	ENSRNOG00000014170	Dbn1	drebrin 1 [Source:RGD Symbol;Acc:70885]	10.9214	12.9572	10.2577	6.1132	4.51819	6.14413	2.03489	1.02495	up
GO:0036117	hyaluranon cable	cellular_component	4	0.0294174	ENSRNOG00000059362	Has3	hyaluronan synthase 3 [Source:RGD Symbol;Acc:628656]	0.551376	0.941067	0.708262	0.367742	0.312288	0.140207	2.68301	1.42385	up
GO:0004063	aryldialkylphosphatase activity	molecular_function	8	0.0294174	ENSRNOG00000008902	Pon1	paraoxonase 1 [Source:RGD Symbol;Acc:620062]	4.94993	3.6737	3.80655	9.75741	7.38752	8.1471	0.491466	-1.02484	down
GO:0051299	centrosome separation	biological_process	5	0.0294174	ENSRNOG00000004487	Nek2	NIMA (never in mitosis gene a)-related kinase 2-like 1 [Source:RGD Symbol;Acc:1582899]	1.56838	1.81988	3.87627	0.970926	0.827985	1.08667	2.51752	1.33201	up
GO:0031729	CCR4 chemokine receptor binding	molecular_function	9	0.0294174	ENSRNOG00000010906	Ccl5	C-C motif chemokine ligand 5 [Source:RGD Symbol;Acc:69069]	48.3284	41.7605	33.5398	89.039	63.5136	135.101	0.429784	-1.21832	down
GO:0036413	histone H3-R26 citrullination	biological_process	11	0.0294174	ENSRNOG00000007574	Padi2	peptidyl arginine deiminase 2 [Source:RGD Symbol;Acc:3288]	1.05408	0.426038	0.672806	1.90207	1.87646	2.07766	0.367632	-1.44367	down
GO:0060302	negative regulation of cytokine activity	biological_process	9	0.0294174	ENSRNOG00000023683	Nog	noggin [Source:RGD Symbol;Acc:3183]	1.3224	2.21724	1.19676	0.464518	0.534484	0.368221	3.46425	1.79254	up
GO:0031750	D3 dopamine receptor binding	molecular_function	8	0.0294174	ENSRNOG00000028404	Ppp1r1b	protein phosphatase 1, regulatory (inhibitor) subunit 1B [Source:RGD Symbol;Acc:621859]	22.4231	7.67647	15.2862	32.2533	35.5582	36.4644	0.435248	-1.20009	down
GO:0018960	4-nitrophenol metabolic process	biological_process	5	0.0294174	ENSRNOG00000012458	Cyp2e1	cytochrome P450, family 2, subfamily e, polypeptide 1 [Source:RGD Symbol;Acc:2475]	5.70974	4.74285	4.83838	17.7295	21.6301	20.9411	0.253579	-1.97949	down
GO:0046666	retinal cell programmed cell death	biological_process	7	0.0294174	ENSRNOG00000002978	Faslg	Fas ligand [Source:RGD Symbol;Acc:3880]	0.709471	0.473535	1.27202	2.10948	1.83509	3.11962	0.347531	-1.52479	down
GO:0034157	positive regulation of toll-like receptor 7 signaling pathway	biological_process	10	0.0294174	ENSRNOG00000007539	Rsad2	radical S-adenosyl methionine domain containing 2 [Source:RGD Symbol;Acc:620495]	4.92785	5.735	5.77652	12.456	7.58066	14.5645	0.475111	-1.07366	down
GO:0072385	minus-end-directed organelle transport along microtubule	biological_process	10	0.0294174	ENSRNOG00000015774	Mreg	melanoregulin [Source:RGD Symbol;Acc:1562333]	0.740493	1.5783	3.06853	0.453484	0.431069	0.6671	3.472	1.79577	up
GO:0004392	heme oxygenase (decyclizing) activity	molecular_function	6	0.0294174	ENSRNOG00000014117	Hmox1	heme oxygenase 1 [Source:RGD Symbol;Acc:2806]	31.9406	70.2869	56.3487	14.3785	22.3463	16.8387	2.96053	1.56586	up
GO:0035759	mesangial cell-matrix adhesion	biological_process	7	0.0294174	ENSRNOG00000034290	Ccl21	C-C motif chemokine ligand 21 [Source:RGD Symbol;Acc:1311996]	71.933	100.476	149.957	63.5991	39.5568	57.0998	2.01157	1.00832	up
GO:0051875	pigment granule localization	biological_process	7	0.0294174	ENSRNOG00000013641	Myo7a	myosin VIIA [Source:RGD Symbol;Acc:628830]	1.16161	0.900417	1.40572	0.61878	0.548688	0.42358	2.17954	1.12402	up
GO:1900218	negative regulation of apoptotic process involved in metanephric nephron tubule development	biological_process	10	0.0294174	ENSRNOG00000026203	Pax8	paired box 8 [Source:RGD Symbol;Acc:620434]	0.679274	0.646556	1.36295	0.21796	0.383172	0.130189	3.6766	1.87837	up
GO:1900215	negative regulation of apoptotic process involved in metanephric collecting duct development	biological_process	10	0.0294174	ENSRNOG00000026203	Pax8	paired box 8 [Source:RGD Symbol;Acc:620434]	0.679274	0.646556	1.36295	0.21796	0.383172	0.130189	3.6766	1.87837	up
GO:0005583	fibrillar collagen trimer	cellular_component	5	0.0294174	ENSRNOG00000004610	Lum	lumican [Source:RGD Symbol;Acc:620984]	6.91226	8.37983	35.9543	5.95545	5.12494	5.60998	3.07042	1.61843	up
GO:2000552	negative regulation of T-helper 2 cell cytokine production	biological_process	12	0.0294174	ENSRNOG00000013304	Arg1	arginase 1 [Source:RGD Symbol;Acc:2150]	8.35733	12.4054	14.4375	5.09255	6.15658	5.0671	2.15737	1.10928	up
GO:2000611	positive regulation of thyroid hormone generation	biological_process	8	0.0294174	ENSRNOG00000026203	Pax8	paired box 8 [Source:RGD Symbol;Acc:620434]	0.679274	0.646556	1.36295	0.21796	0.383172	0.130189	3.6766	1.87837	up
GO:0048563	post-embryonic animal organ morphogenesis	biological_process	6	0.0294174	ENSRNOG00000013641	Myo7a	myosin VIIA [Source:RGD Symbol;Acc:628830]	1.16161	0.900417	1.40572	0.61878	0.548688	0.42358	2.17954	1.12402	up
GO:0071228	cellular response to tumor cell	biological_process	6	0.0294174	ENSRNOG00000021201	Txnip	thioredoxin interacting protein [Source:RGD Symbol;Acc:620886]	381.684	279.835	482.899	706.409	874.051	787.516	0.483289	-1.04904	down
GO:0090274	positive regulation of somatostatin secretion	biological_process	11	0.0294174	ENSRNOG00000017873	Sct	secretin [Source:RGD Symbol;Acc:3643]	1.23791	1.93048	2.4561	0.102153	0.550348	0.362674	5.54041	2.46999	up
GO:2000818	negative regulation of myoblast proliferation	biological_process	8	0.0294174	ENSRNOG00000021294	Mstn	myostatin [Source:RGD Symbol;Acc:3115]	0.059124	1.35602	0.037337	0	0	0	4841.6	12.2413	up
GO:0014050	negative regulation of glutamate secretion	biological_process	10	0.0294174	ENSRNOG00000011824	Trh	thyrotropin releasing hormone [Source:RGD Symbol;Acc:3903]	0.198757	0.928469	2.94448	0	0.220139	0.033459	16.0558	4.00502	up
GO:0060309	elastin catabolic process	biological_process	9	0.0294174	ENSRNOG00000030187	Mmp12	matrix metallopeptidase 12 [Source:RGD Symbol;Acc:620195]	0.8267	3.66773	18.8195	0.329763	0.456892	0.690975	15.7779	3.97983	up
GO:1904571	positive regulation of selenocysteine incorporation	biological_process	12	0.0294174	ENSRNOG00000032825	LOC100362027	ribosomal protein L30 [Source:RGD Symbol;Acc:621201]	29.6581	57.4997	72.8836	227.708	210.401	65.5614	0.317751	-1.65403	down
GO:0046473	phosphatidic acid metabolic process	biological_process	9	0.0294174	ENSRNOG00000016945	Pla2g2a	phospholipase A2 group IIA [Source:RGD Symbol;Acc:620857]	31.8882	19.843	49.1573	12.1527	19.2349	10.06	2.43412	1.2834	up
GO:0032764	negative regulation of mast cell cytokine production	biological_process	9	0.0294174	ENSRNOG00000014117	Hmox1	heme oxygenase 1 [Source:RGD Symbol;Acc:2806]	31.9406	70.2869	56.3487	14.3785	22.3463	16.8387	2.96053	1.56586	up
GO:0097159	organic cyclic compound binding	molecular_function	4	0.0294174	ENSRNOG00000017060	Ryr2	ryanodine receptor 2 [Source:RGD Symbol;Acc:620314]	0.285075	0.300051	1.47817	0.173643	0.049516	0.188027	5.01792	2.32709	up
GO:0002752	cell surface pattern recognition receptor signaling pathway	biological_process	8	0.0294174	ENSRNOG00000009342	Fcnb	ficolin B [Source:RGD Symbol;Acc:621222]	6.86838	5.02796	3.18654	12.0512	8.59387	23.5555	0.341237	-1.55115	down
GO:0097050	type B pancreatic cell apoptotic process	biological_process	8	0.0294174	ENSRNOG00000017060	Ryr2	ryanodine receptor 2 [Source:RGD Symbol;Acc:620314]	0.285075	0.300051	1.47817	0.173643	0.049516	0.188027	5.01792	2.32709	up
GO:0004053	arginase activity	molecular_function	7	0.0294174	ENSRNOG00000013304	Arg1	arginase 1 [Source:RGD Symbol;Acc:2150]	8.35733	12.4054	14.4375	5.09255	6.15658	5.0671	2.15737	1.10928	up
GO:0051648	vesicle localization	biological_process	6	0.0294174	ENSRNOG00000004177	Myo1a	myosin IA [Source:RGD Symbol;Acc:3135]	0.621574	0.513884	0.299639	1.36739	1.14678	1.28165	0.378073	-1.40326	down
GO:0045092	interleukin-18 receptor complex	cellular_component	6	0.0294174	ENSRNOG00000054218	Il18rap	interleukin 18 receptor accessory protein [Source:RGD Symbol;Acc:727867]	0.952382	0.874742	0.928804	2.62494	1.36523	2.00221	0.459906	-1.12059	down
GO:0032608	interferon-beta production	biological_process	6	0.0294174	ENSRNOG00000017414	Irf7	interferon regulatory factor 7 [Source:RGD Symbol;Acc:1307828]	50.0909	39.3499	31.835	103.562	77.9961	166.957	0.347979	-1.52293	down
GO:0098840	protein transport along microtubule	biological_process	11	0.0294174	ENSRNOG00000023993	Kif1a	kinesin family member 1A [Source:RGD Symbol;Acc:1304996]	0.166506	0.124253	0.194855	0.636146	0.353681	0.430159	0.341985	-1.54799	down
GO:2000392	regulation of lamellipodium morphogenesis	biological_process	8	0.0294174	ENSRNOG00000015408	Vil1	villin 1 [Source:RGD Symbol;Acc:1307048]	0.852	0.23051	0.408527	1.89595	1.63924	3.09661	0.224832	-2.15308	down
GO:0002357	defense response to tumor cell	biological_process	6	0.0294174	ENSRNOG00000000562	Prf1	perforin 1 [Source:RGD Symbol;Acc:708463]	11.7317	8.28855	6.91728	21.9426	12.0857	30.3654	0.418325	-1.2573	down
GO:0042008	interleukin-18 receptor activity	molecular_function	7	0.0294174	ENSRNOG00000054218	Il18rap	interleukin 18 receptor accessory protein [Source:RGD Symbol;Acc:727867]	0.952382	0.874742	0.928804	2.62494	1.36523	2.00221	0.459906	-1.12059	down
GO:0071306	cellular response to vitamin E	biological_process	8	0.0294174	ENSRNOG00000003897	Col1a1	collagen type I alpha 1 chain [Source:RGD Symbol;Acc:61817]	126.27	249.911	273.591	58.1167	63.4283	51.677	3.75109	1.90731	up
GO:0005592	collagen type XI trimer	cellular_component	6	0.0294174	ENSRNOG00000023148	Col11a1	collagen type XI alpha 1 chain [Source:RGD Symbol;Acc:2372]	0.411087	0.52551	0.885577	0.224042	0.278554	0.247892	2.42799	1.27976	up
GO:0045585	positive regulation of cytotoxic T cell differentiation	biological_process	11	0.0294174	ENSRNOG00000045595	Tnfsf9	TNF superfamily member 9 [Source:RGD Symbol;Acc:727974]	1.37669	1.19038	1.76987	0.488094	0.275907	0.330177	3.96364	1.98683	up
GO:0048388	endosomal lumen acidification	biological_process	13	0.0294174	ENSRNOG00000002978	Faslg	Fas ligand [Source:RGD Symbol;Acc:3880]	0.709471	0.473535	1.27202	2.10948	1.83509	3.11962	0.347531	-1.52479	down
GO:0038112	interleukin-8-mediated signaling pathway	biological_process	7	0.0294174	ENSRNOG00000048239	Cxcr1	C-X-C motif chemokine receptor 1 [Source:RGD Symbol;Acc:2905]	12.0581	12.2964	6.19431	5.02716	3.39089	4.10572	2.43926	1.28645	up
GO:0051354	negative regulation of oxidoreductase activity	biological_process	7	0.0294174	ENSRNOG00000010603	Gzma	granzyme A [Source:RGD Symbol;Acc:628640]	8.31047	7.27624	8.60605	18.3746	12.8989	25.6912	0.424698	-1.23549	down
GO:1900229	negative regulation of single-species biofilm formation in or on host organism	biological_process	8	0.0294174	ENSRNOG00000013859	Bpifa1	BPI fold containing family A, member 1 [Source:RGD Symbol;Acc:619818]	0.423531	0.205181	928.063	0.160324	0.123339	0.870753	804.469	9.65189	up
GO:0035606	peptidyl-cysteine S-trans-nitrosylation	biological_process	11	0.0294174	ENSRNOG00000011483	S100a9	S100 calcium binding protein A9 [Source:RGD Symbol;Acc:620267]	20.221	25.7548	22.6237	43.4388	35.8205	91.6187	0.401453	-1.3167	down
GO:1904956	regulation of midbrain dopaminergic neuron differentiation	biological_process	11	0.0294174	ENSRNOG00000017783	Sfrp1	secreted frizzled-related protein 1 [Source:RGD Symbol;Acc:621074]	1.68002	2.38548	4.44256	1.64961	1.21244	0.920778	2.24913	1.16937	up
GO:0046395	carboxylic acid catabolic process	biological_process	7	0.0294174	ENSRNOG00000008902	Pon1	paraoxonase 1 [Source:RGD Symbol;Acc:620062]	4.94993	3.6737	3.80655	9.75741	7.38752	8.1471	0.491466	-1.02484	down
GO:0043179	rhythmic excitation	biological_process	10	0.0294174	ENSRNOG00000006639	Scn9a	sodium voltage-gated channel alpha subunit 9 [Source:RGD Symbol;Acc:69368]	0.00415055	0.00708024	0.083853	0	0	0	316.946	8.30809	up
GO:1903766	positive regulation of potassium ion export across plasma membrane	biological_process	12	0.0294174	ENSRNOG00000008176	Nppa	natriuretic peptide A [Source:RGD Symbol;Acc:3193]	0	0	4.77912	0	0	0	15930.4	13.9595	up
GO:0090285	negative regulation of protein glycosylation in Golgi	biological_process	11	0.0294174	ENSRNOG00000007637	Acer2	alkaline ceramidase 2 [Source:RGD Symbol;Acc:1304629]	130.856	81.491	59.5416	196.926	173.911	212.56	0.466044	-1.10146	down
GO:0072073	kidney epithelium development	biological_process	7	0.0294174	ENSRNOG00000026203	Pax8	paired box 8 [Source:RGD Symbol;Acc:620434]	0.679274	0.646556	1.36295	0.21796	0.383172	0.130189	3.6766	1.87837	up
GO:0031328	positive regulation of cellular biosynthetic process	biological_process	8	0.0294174	ENSRNOG00000010906	Ccl5	C-C motif chemokine ligand 5 [Source:RGD Symbol;Acc:69069]	48.3284	41.7605	33.5398	89.039	63.5136	135.101	0.429784	-1.21832	down
GO:0031728	CCR3 chemokine receptor binding	molecular_function	9	0.0294174	ENSRNOG00000031162	Ccl24	C-C motif chemokine ligand 24 [Source:RGD Symbol;Acc:1310245]	2.95267	4.5172	2.6358	1.47836	0.899061	1.85835	2.38579	1.25447	up
GO:0098907	regulation of SA node cell action potential	biological_process	7	0.0294174	ENSRNOG00000017060	Ryr2	ryanodine receptor 2 [Source:RGD Symbol;Acc:620314]	0.285075	0.300051	1.47817	0.173643	0.049516	0.188027	5.01792	2.32709	up
GO:2000041	negative regulation of planar cell polarity pathway involved in axis elongation	biological_process	8	0.0294174	ENSRNOG00000017783	Sfrp1	secreted frizzled-related protein 1 [Source:RGD Symbol;Acc:621074]	1.68002	2.38548	4.44256	1.64961	1.21244	0.920778	2.24913	1.16937	up
GO:0002418	immune response to tumor cell	biological_process	6	0.0294174	ENSRNOG00000000562	Prf1	perforin 1 [Source:RGD Symbol;Acc:708463]	11.7317	8.28855	6.91728	21.9426	12.0857	30.3654	0.418325	-1.2573	down
GO:0004918	interleukin-8 receptor activity	molecular_function	10	0.0294174	ENSRNOG00000048239	Cxcr1	C-X-C motif chemokine receptor 1 [Source:RGD Symbol;Acc:2905]	12.0581	12.2964	6.19431	5.02716	3.39089	4.10572	2.43926	1.28645	up
GO:1903981	enterobactin binding	molecular_function	6	0.0294174	ENSRNOG00000013973	Lcn2	lipocalin 2 [Source:RGD Symbol;Acc:69408]	399.193	738.611	424.407	107.199	115.007	143.758	4.26876	2.09382	up
GO:1903305	regulation of regulated secretory pathway	biological_process	8	0.0294174	ENSRNOG00000006426	Syt1	synaptotagmin 1 [Source:RGD Symbol;Acc:3803]	0.535581	0.254328	0.726439	1.20032	1.83951	1.33849	0.346332	-1.52977	down
GO:0023030	MHC class Ib protein binding, via antigen binding groove	molecular_function	8	0.0294174	ENSRNOG00000060246	Klrd1	killer cell lectin like receptor D1 [Source:RGD Symbol;Acc:2978]	3.34348	2.3231	3.44577	7.56228	4.74204	9.73844	0.413394	-1.27441	down
GO:0072305	negative regulation of mesenchymal cell apoptotic process involved in metanephric nephron morphogenesis	biological_process	10	0.0294174	ENSRNOG00000026203	Pax8	paired box 8 [Source:RGD Symbol;Acc:620434]	0.679274	0.646556	1.36295	0.21796	0.383172	0.130189	3.6766	1.87837	up
GO:0008043	intracellular ferritin complex	cellular_component	5	0.0294174	ENSRNOG00000031506	Ftl1	ferritin light chain 1 [Source:RGD Symbol;Acc:61813]	52.0288	52.2376	40.6289	19.4586	27.1585	22.9462	2.08293	1.05861	up
GO:0002223	stimulatory C-type lectin receptor signaling pathway	biological_process	8	0.0294174	ENSRNOG00000058714	Klre1	killer cell lectin-like receptor, family E, member 1 [Source:RGD Symbol;Acc:727903]	1.41711	1.79425	1.54913	5.00401	2.61277	6.33873	0.341119	-1.55165	down
GO:0015891	siderophore transport	biological_process	7	0.0294174	ENSRNOG00000013973	Lcn2	lipocalin 2 [Source:RGD Symbol;Acc:69408]	399.193	738.611	424.407	107.199	115.007	143.758	4.26876	2.09382	up
GO:0061513	glucose 6-phosphate:inorganic phosphate antiporter activity	molecular_function	8	0.0294174	ENSRNOG00000039390	Slc37a2	solute carrier family 37 member 2 [Source:RGD Symbol;Acc:1564160]	1.97428	2.51988	3.94794	1.16326	1.15279	1.37104	2.28964	1.19512	up
GO:1904692	positive regulation of type B pancreatic cell proliferation	biological_process	9	0.0294174	ENSRNOG00000019587	Ptprn	protein tyrosine phosphatase, receptor type, N [Source:RGD Symbol;Acc:620777]	0.404913	0.311202	1.36381	0.178802	0.024688	0.090892	7.0654	2.82077	up
GO:0034124	regulation of MyD88-dependent toll-like receptor signaling pathway	biological_process	9	0.0294174	ENSRNOG00000017414	Irf7	interferon regulatory factor 7 [Source:RGD Symbol;Acc:1307828]	50.0909	39.3499	31.835	103.562	77.9961	166.957	0.347979	-1.52293	down
GO:0090177	establishment of planar polarity involved in neural tube closure	biological_process	8	0.0294174	ENSRNOG00000004578	Cthrc1	collagen triple helix repeat containing 1 [Source:RGD Symbol;Acc:628801]	3.10308	5.29985	11.6251	2.15384	2.19971	2.10492	3.10105	1.63276	up
GO:0070722	Tle3-Aes complex	cellular_component	7	0.0294174	ENSRNOG00000010685	Tbx18	T-box18 [Source:RGD Symbol;Acc:1309856]	0.623904	2.0598	1.35705	0.443902	0.506117	0.376577	3.04596	1.6069	up
GO:0048632	negative regulation of skeletal muscle tissue growth	biological_process	8	0.0294174	ENSRNOG00000021294	Mstn	myostatin [Source:RGD Symbol;Acc:3115]	0.059124	1.35602	0.037337	0	0	0	4841.6	12.2413	up
GO:0051284	positive regulation of sequestering of calcium ion	biological_process	7	0.0294174	ENSRNOG00000017060	Ryr2	ryanodine receptor 2 [Source:RGD Symbol;Acc:620314]	0.285075	0.300051	1.47817	0.173643	0.049516	0.188027	5.01792	2.32709	up
GO:0039003	pronephric field specification	biological_process	7	0.0294174	ENSRNOG00000026203	Pax8	paired box 8 [Source:RGD Symbol;Acc:620434]	0.679274	0.646556	1.36295	0.21796	0.383172	0.130189	3.6766	1.87837	up
GO:0015333	peptide:proton symporter activity	molecular_function	11	0.0294174	ENSRNOG00000011598	Slc15a1	solute carrier family 15 member 1 [Source:RGD Symbol;Acc:621736]	0.061492	0.060826	0.078949	0	0	0	670.89	9.38993	up
GO:0048101	calcium- and calmodulin-regulated 3',5'-cyclic-GMP phosphodiesterase activity	molecular_function	11	0.0294174	ENSRNOG00000054212	Pde1a	phosphodiesterase 1A [Source:RGD Symbol;Acc:68329]	1.57085	2.96311	2.99337	1.33966	1.12177	1.16821	2.07385	1.05231	up
GO:0006788	heme oxidation	biological_process	9	0.0294174	ENSRNOG00000014117	Hmox1	heme oxygenase 1 [Source:RGD Symbol;Acc:2806]	31.9406	70.2869	56.3487	14.3785	22.3463	16.8387	2.96053	1.56586	up
GO:0016813	hydrolase activity, acting on carbon-nitrogen (but not peptide) bonds, in linear amidines	molecular_function	6	0.0294174	ENSRNOG00000013304	Arg1	arginase 1 [Source:RGD Symbol;Acc:2150]	8.35733	12.4054	14.4375	5.09255	6.15658	5.0671	2.15737	1.10928	up
GO:0007320	insemination	biological_process	5	0.0294174	ENSRNOG00000017606	P2rx1	purinergic receptor P2X 1 [Source:RGD Symbol;Acc:3240]	7.18568	9.04786	9.01957	19.2409	13.9678	19.8251	0.476169	-1.07045	down
GO:0004132	dCMP deaminase activity	molecular_function	7	0.0294174	ENSRNOG00000013215	Dctd	dCMP deaminase [Source:RGD Symbol;Acc:1359671]	1.66108	2.35547	3.79807	1.15596	1.07583	1.51322	2.08668	1.06121	up
GO:0019959	interleukin-8 binding	molecular_function	8	0.0294174	ENSRNOG00000048239	Cxcr1	C-X-C motif chemokine receptor 1 [Source:RGD Symbol;Acc:2905]	12.0581	12.2964	6.19431	5.02716	3.39089	4.10572	2.43926	1.28645	up
GO:0002588	positive regulation of antigen processing and presentation of peptide antigen via MHC class II	biological_process	9	0.0294174	ENSRNOG00000013578	Trem2	triggering receptor expressed on myeloid cells 2 [Source:RGD Symbol;Acc:1309841]	7.38714	14.2293	26.9458	3.19457	3.44342	4.12088	4.51369	2.17431	up
GO:0007600	sensory perception	biological_process	6	0.0294174	ENSRNOG00000013641	Myo7a	myosin VIIA [Source:RGD Symbol;Acc:628830]	1.16161	0.900417	1.40572	0.61878	0.548688	0.42358	2.17954	1.12402	up
GO:0016098	monoterpenoid metabolic process	biological_process	9	0.0294174	ENSRNOG00000012458	Cyp2e1	cytochrome P450, family 2, subfamily e, polypeptide 1 [Source:RGD Symbol;Acc:2475]	5.70974	4.74285	4.83838	17.7295	21.6301	20.9411	0.253579	-1.97949	down
GO:2000866	positive regulation of estradiol secretion	biological_process	9	0.0294174	ENSRNOG00000043451	Spp1	secreted phosphoprotein 1 [Source:RGD Symbol;Acc:3752]	5.06055	8.53045	47.2968	2.53233	1.09522	0.50064	14.7493	3.88257	up
GO:1903514	release of sequestered calcium ion into cytosol by endoplasmic reticulum	biological_process	9	0.0294174	ENSRNOG00000002978	Faslg	Fas ligand [Source:RGD Symbol;Acc:3880]	0.709471	0.473535	1.27202	2.10948	1.83509	3.11962	0.347531	-1.52479	down
GO:0005604	basement membrane	cellular_component	6	0.0298207	ENSRNOG00000004275	Egfl6	EGF-like-domain, multiple 6 [Source:RGD Symbol;Acc:1563321]	82.0957	83.7678	48.7801	33.0382	31.1522	23.1532	2.45746	1.29717	up
GO:0005604	basement membrane	cellular_component	6	0.0298207	ENSRNOG00000010529	Thbs2	thrombospondin 2 [Source:RGD Symbol;Acc:1310979]	2.57939	6.01878	6.82916	1.12399	1.12034	1.18604	4.49727	2.16905	up
GO:0005604	basement membrane	cellular_component	6	0.0298207	ENSRNOG00000022309	Frem1	Fras1 related extracellular matrix 1 [Source:RGD Symbol;Acc:1306981]	1.36901	2.59813	0.963709	0.737613	0.47728	0.596065	2.72279	1.44508	up
GO:0005604	basement membrane	cellular_component	6	0.0298207	ENSRNOG00000039197	LOC108348074	collagen alpha-1(XV) chain-like [Source:RGD Symbol;Acc:11464459]	27.4934	28.1683	11.323	10.5648	7.14882	12.7016	2.20234	1.13904	up
GO:0031667	response to nutrient levels	biological_process	6	0.0298207	ENSRNOG00000003897	Col1a1	collagen type I alpha 1 chain [Source:RGD Symbol;Acc:61817]	126.27	249.911	273.591	58.1167	63.4283	51.677	3.75109	1.90731	up
GO:0031667	response to nutrient levels	biological_process	6	0.0298207	ENSRNOG00000008902	Pon1	paraoxonase 1 [Source:RGD Symbol;Acc:620062]	4.94993	3.6737	3.80655	9.75741	7.38752	8.1471	0.491466	-1.02484	down
GO:0031667	response to nutrient levels	biological_process	6	0.0298207	ENSRNOG00000013973	Lcn2	lipocalin 2 [Source:RGD Symbol;Acc:69408]	399.193	738.611	424.407	107.199	115.007	143.758	4.26876	2.09382	up
GO:0031667	response to nutrient levels	biological_process	6	0.0298207	ENSRNOG00000017873	Sct	secretin [Source:RGD Symbol;Acc:3643]	1.23791	1.93048	2.4561	0.102153	0.550348	0.362674	5.54041	2.46999	up
GO:0009636	response to toxic substance	biological_process	5	0.0310373	ENSRNOG00000006639	Scn9a	sodium voltage-gated channel alpha subunit 9 [Source:RGD Symbol;Acc:69368]	0.00415055	0.00708024	0.083853	0	0	0	316.946	8.30809	up
GO:0009636	response to toxic substance	biological_process	5	0.0310373	ENSRNOG00000008902	Pon1	paraoxonase 1 [Source:RGD Symbol;Acc:620062]	4.94993	3.6737	3.80655	9.75741	7.38752	8.1471	0.491466	-1.02484	down
GO:0009636	response to toxic substance	biological_process	5	0.0310373	ENSRNOG00000010906	Ccl5	C-C motif chemokine ligand 5 [Source:RGD Symbol;Acc:69069]	48.3284	41.7605	33.5398	89.039	63.5136	135.101	0.429784	-1.21832	down
GO:0009636	response to toxic substance	biological_process	5	0.0310373	ENSRNOG00000013704	Cps1	carbamoyl-phosphate synthase 1 [Source:RGD Symbol;Acc:2395]	0.0296366	0.0318274	0.0321218	0	0	0	311.953	8.28518	up
GO:0022857	transmembrane transporter activity	molecular_function	4	0.031308	ENSRNOG00000002305	Slc15a2	solute carrier family 15 member 2 [Source:RGD Symbol;Acc:61972]	6.53357	3.24723	3.62347	12.5401	8.54652	8.59094	0.451663	-1.14668	down
GO:0022857	transmembrane transporter activity	molecular_function	4	0.031308	ENSRNOG00000010938	Slc7a10	solute carrier family 7 member 10 [Source:RGD Symbol;Acc:621672]	5.14524	4.07878	5.28848	21.1096	13.4018	15.739	0.288803	-1.79184	down
GO:0022857	transmembrane transporter activity	molecular_function	4	0.031308	ENSRNOG00000011598	Slc15a1	solute carrier family 15 member 1 [Source:RGD Symbol;Acc:621736]	0.061492	0.060826	0.078949	0	0	0	670.89	9.38993	up
GO:0022857	transmembrane transporter activity	molecular_function	4	0.031308	ENSRNOG00000017775	Slc5a1	solute carrier family 5 member 1 [Source:RGD Symbol;Acc:3713]	5.02389	3.24643	3.5349	9.53507	10.2527	6.94576	0.441589	-1.17922	down
GO:0022857	transmembrane transporter activity	molecular_function	4	0.031308	ENSRNOG00000024903	Slc7a13	solute carrier family 7 member 13 [Source:RGD Symbol;Acc:1311633]	0.127032	0.106233	0.124536	1.28615	0.650971	0.667867	0.137352	-2.86405	down
GO:0022857	transmembrane transporter activity	molecular_function	4	0.031308	ENSRNOG00000039390	Slc37a2	solute carrier family 37 member 2 [Source:RGD Symbol;Acc:1564160]	1.97428	2.51988	3.94794	1.16326	1.15279	1.37104	2.28964	1.19512	up
GO:0010460	positive regulation of heart rate	biological_process	10	0.0316908	ENSRNOG00000008176	Nppa	natriuretic peptide A [Source:RGD Symbol;Acc:3193]	0	0	4.77912	0	0	0	15930.4	13.9595	up
GO:0010460	positive regulation of heart rate	biological_process	10	0.0316908	ENSRNOG00000017060	Ryr2	ryanodine receptor 2 [Source:RGD Symbol;Acc:620314]	0.285075	0.300051	1.47817	0.173643	0.049516	0.188027	5.01792	2.32709	up
GO:0019956	chemokine binding	molecular_function	6	0.0316908	ENSRNOG00000033234	Ccrl2	C-C motif chemokine receptor like 2 [Source:RGD Symbol;Acc:1311811]	7.3731	6.65768	5.30731	12.9877	11.6706	14.5202	0.493589	-1.01862	down
GO:0019956	chemokine binding	molecular_function	6	0.0316908	ENSRNOG00000048239	Cxcr1	C-X-C motif chemokine receptor 1 [Source:RGD Symbol;Acc:2905]	12.0581	12.2964	6.19431	5.02716	3.39089	4.10572	2.43926	1.28645	up
GO:0050431	transforming growth factor beta binding	molecular_function	6	0.0316908	ENSRNOG00000002831	Wfikkn2	WAP, follistatin/kazal, immunoglobulin, kunitz and netrin domain containing 2 [Source:RGD Symbol;Acc:1305361]	0.67908	0.636644	0.827013	0.12076	0.21243	0.113778	4.79394	2.26121	up
GO:0050431	transforming growth factor beta binding	molecular_function	6	0.0316908	ENSRNOG00000025332	Cd109	CD109 molecule [Source:RGD Symbol;Acc:1311287]	0.664014	1.9128	1.14092	0.472451	0.345737	0.370172	3.12846	1.64545	up
GO:0043621	protein self-association	molecular_function	5	0.0323302	ENSRNOG00000007539	Rsad2	radical S-adenosyl methionine domain containing 2 [Source:RGD Symbol;Acc:620495]	4.92785	5.735	5.77652	12.456	7.58066	14.5645	0.475111	-1.07366	down
GO:0043621	protein self-association	molecular_function	5	0.0323302	ENSRNOG00000010906	Ccl5	C-C motif chemokine ligand 5 [Source:RGD Symbol;Acc:69069]	48.3284	41.7605	33.5398	89.039	63.5136	135.101	0.429784	-1.21832	down
GO:0043621	protein self-association	molecular_function	5	0.0323302	ENSRNOG00000017060	Ryr2	ryanodine receptor 2 [Source:RGD Symbol;Acc:620314]	0.285075	0.300051	1.47817	0.173643	0.049516	0.188027	5.01792	2.32709	up
GO:0005179	hormone activity	molecular_function	7	0.0335572	ENSRNOG00000001955	Retnla	resistin like alpha [Source:RGD Symbol;Acc:68349]	586.112	869.381	2266.69	234.743	302.815	270.878	4.60418	2.20294	up
GO:0005179	hormone activity	molecular_function	7	0.0335572	ENSRNOG00000008176	Nppa	natriuretic peptide A [Source:RGD Symbol;Acc:3193]	0	0	4.77912	0	0	0	15930.4	13.9595	up
GO:0005179	hormone activity	molecular_function	7	0.0335572	ENSRNOG00000011824	Trh	thyrotropin releasing hormone [Source:RGD Symbol;Acc:3903]	0.198757	0.928469	2.94448	0	0.220139	0.033459	16.0558	4.00502	up
GO:0005179	hormone activity	molecular_function	7	0.0335572	ENSRNOG00000017873	Sct	secretin [Source:RGD Symbol;Acc:3643]	1.23791	1.93048	2.4561	0.102153	0.550348	0.362674	5.54041	2.46999	up
GO:0008199	ferric iron binding	molecular_function	9	0.0348738	ENSRNOG00000031506	Ftl1	ferritin light chain 1 [Source:RGD Symbol;Acc:61813]	52.0288	52.2376	40.6289	19.4586	27.1585	22.9462	2.08293	1.05861	up
GO:0008199	ferric iron binding	molecular_function	9	0.0348738	ENSRNOG00000033776	LOC100359668	ferritin light chain 2 [Source:RGD Symbol;Acc:2325062]	18.2062	15.2948	13.275	6.91254	7.86972	8.32579	2.02423	1.01737	up
GO:0044331	cell-cell adhesion mediated by cadherin	biological_process	6	0.0348738	ENSRNOG00000013481	Cdh11	cadherin 11 [Source:RGD Symbol;Acc:619742]	13.9402	23.495	20.613	7.8593	11.181	7.5212	2.18543	1.12791	up
GO:0044331	cell-cell adhesion mediated by cadherin	biological_process	6	0.0348738	ENSRNOG00000033837	Cdh9	cadherin 9 [Source:RGD Symbol;Acc:1308343]	0	0	0	0.210953	0.147315	0.112743	0.000636928	-10.6166	down
GO:0051966	regulation of synaptic transmission, glutamatergic	biological_process	9	0.0348738	ENSRNOG00000006426	Syt1	synaptotagmin 1 [Source:RGD Symbol;Acc:3803]	0.535581	0.254328	0.726439	1.20032	1.83951	1.33849	0.346332	-1.52977	down
GO:0051966	regulation of synaptic transmission, glutamatergic	biological_process	9	0.0348738	ENSRNOG00000015461	Serpine2	serpin family E member 2 [Source:RGD Symbol;Acc:3748]	21.8704	32.5856	37.2124	17.0684	13.4899	15.117	2.00695	1.00501	up
GO:0005540	hyaluronic acid binding	molecular_function	6	0.0348738	ENSRNOG00000012442	Cemip	cell migration inducing hyaluronidase [Source:RGD Symbol;Acc:1305254]	4.17147	5.86685	2.59443	1.03326	1.02633	1.30613	3.75336	1.90818	up
GO:0005540	hyaluronic acid binding	molecular_function	6	0.0348738	ENSRNOG00000029212	Vcan	versican [Source:RGD Symbol;Acc:619940]	2.24955	4.3322	4.42122	1.48965	1.11479	1.8692	2.45951	1.29837	up
GO:0031683	G-protein beta/gamma-subunit complex binding	molecular_function	5	0.0348738	ENSRNOG00000005268	Gnat3	G protein subunit alpha transducin 3 [Source:RGD Symbol;Acc:727817]	1.25921	0.481596	0.306878	3.70113	2.49755	4.15072	0.197855	-2.33748	down
GO:0031683	G-protein beta/gamma-subunit complex binding	molecular_function	5	0.0348738	ENSRNOG00000019296	Gnat2	G protein subunit alpha transducin 2 [Source:RGD Symbol;Acc:1309514]	1.54464	1.73817	1.48	3.37445	2.70398	3.67333	0.488405	-1.03385	down
GO:0042060	wound healing	biological_process	6	0.0375545	ENSRNOG00000003897	Col1a1	collagen type I alpha 1 chain [Source:RGD Symbol;Acc:61817]	126.27	249.911	273.591	58.1167	63.4283	51.677	3.75109	1.90731	up
GO:0042060	wound healing	biological_process	6	0.0375545	ENSRNOG00000011557	S100a8	S100 calcium binding protein A8 [Source:RGD Symbol;Acc:620265]	6.86219	14.8878	7.83776	25.2298	19.4616	46.9158	0.322986	-1.63046	down
GO:0042060	wound healing	biological_process	6	0.0375545	ENSRNOG00000023683	Nog	noggin [Source:RGD Symbol;Acc:3183]	1.3224	2.21724	1.19676	0.464518	0.534484	0.368221	3.46425	1.79254	up
GO:0042060	wound healing	biological_process	6	0.0375545	ENSRNOG00000030187	Mmp12	matrix metallopeptidase 12 [Source:RGD Symbol;Acc:620195]	0.8267	3.66773	18.8195	0.329763	0.456892	0.690975	15.7779	3.97983	up
GO:2000300	regulation of synaptic vesicle exocytosis	biological_process	7	0.0378469	ENSRNOG00000006426	Syt1	synaptotagmin 1 [Source:RGD Symbol;Acc:3803]	0.535581	0.254328	0.726439	1.20032	1.83951	1.33849	0.346332	-1.52977	down
GO:2000300	regulation of synaptic vesicle exocytosis	biological_process	7	0.0378469	ENSRNOG00000017606	P2rx1	purinergic receptor P2X 1 [Source:RGD Symbol;Acc:3240]	7.18568	9.04786	9.01957	19.2409	13.9678	19.8251	0.476169	-1.07045	down
GO:2000300	regulation of synaptic vesicle exocytosis	biological_process	7	0.0378469	ENSRNOG00000020833	Cspg5	chondroitin sulfate proteoglycan 5 [Source:RGD Symbol;Acc:2431]	1.01362	1.31543	1.50196	0.355355	0.368381	0.655816	2.77699	1.47352	up
GO:0035094	response to nicotine	biological_process	6	0.0378469	ENSRNOG00000005268	Gnat3	G protein subunit alpha transducin 3 [Source:RGD Symbol;Acc:727817]	1.25921	0.481596	0.306878	3.70113	2.49755	4.15072	0.197855	-2.33748	down
GO:0035094	response to nicotine	biological_process	6	0.0378469	ENSRNOG00000014117	Hmox1	heme oxygenase 1 [Source:RGD Symbol;Acc:2806]	31.9406	70.2869	56.3487	14.3785	22.3463	16.8387	2.96053	1.56586	up
GO:0035094	response to nicotine	biological_process	6	0.0378469	ENSRNOG00000028404	Ppp1r1b	protein phosphatase 1, regulatory (inhibitor) subunit 1B [Source:RGD Symbol;Acc:621859]	22.4231	7.67647	15.2862	32.2533	35.5582	36.4644	0.435248	-1.20009	down
GO:0016342	catenin complex	cellular_component	6	0.0381751	ENSRNOG00000013481	Cdh11	cadherin 11 [Source:RGD Symbol;Acc:619742]	13.9402	23.495	20.613	7.8593	11.181	7.5212	2.18543	1.12791	up
GO:0016342	catenin complex	cellular_component	6	0.0381751	ENSRNOG00000033837	Cdh9	cadherin 9 [Source:RGD Symbol;Acc:1308343]	0	0	0	0.210953	0.147315	0.112743	0.000636928	-10.6166	down
GO:0010800	positive regulation of peptidyl-threonine phosphorylation	biological_process	11	0.0381751	ENSRNOG00000012442	Cemip	cell migration inducing hyaluronidase [Source:RGD Symbol;Acc:1305254]	4.17147	5.86685	2.59443	1.03326	1.02633	1.30613	3.75336	1.90818	up
GO:0010800	positive regulation of peptidyl-threonine phosphorylation	biological_process	11	0.0381751	ENSRNOG00000053272	Chi3l1	chitinase 3 like 1 [Source:RGD Symbol;Acc:620874]	78.1203	93.0092	101.602	41.6996	35.3419	56.541	2.04167	1.02975	up
GO:0014850	response to muscle activity	biological_process	5	0.0381751	ENSRNOG00000017060	Ryr2	ryanodine receptor 2 [Source:RGD Symbol;Acc:620314]	0.285075	0.300051	1.47817	0.173643	0.049516	0.188027	5.01792	2.32709	up
GO:0014850	response to muscle activity	biological_process	5	0.0381751	ENSRNOG00000021294	Mstn	myostatin [Source:RGD Symbol;Acc:3115]	0.059124	1.35602	0.037337	0	0	0	4841.6	12.2413	up
GO:0019957	C-C chemokine binding	molecular_function	7	0.0381751	ENSRNOG00000033234	Ccrl2	C-C motif chemokine receptor like 2 [Source:RGD Symbol;Acc:1311811]	7.3731	6.65768	5.30731	12.9877	11.6706	14.5202	0.493589	-1.01862	down
GO:0019957	C-C chemokine binding	molecular_function	7	0.0381751	ENSRNOG00000048239	Cxcr1	C-X-C motif chemokine receptor 1 [Source:RGD Symbol;Acc:2905]	12.0581	12.2964	6.19431	5.02716	3.39089	4.10572	2.43926	1.28645	up
GO:0030574	collagen catabolic process	biological_process	5	0.0381751	ENSRNOG00000017477	Mmp23	matrix metallopeptidase 23 [Source:RGD Symbol;Acc:620201]	7.15585	8.3661	9.35647	2.48982	2.59284	4.01865	2.7335	1.45075	up
GO:0030574	collagen catabolic process	biological_process	5	0.0381751	ENSRNOG00000021155	Ctsk	cathepsin K [Source:RGD Symbol;Acc:61810]	8.68873	18.433	39.2286	5.53409	8.14942	6.72412	3.25125	1.70099	up
GO:0060122	inner ear receptor cell stereocilium organization	biological_process	8	0.0381751	ENSRNOG00000004578	Cthrc1	collagen triple helix repeat containing 1 [Source:RGD Symbol;Acc:628801]	3.10308	5.29985	11.6251	2.15384	2.19971	2.10492	3.10105	1.63276	up
GO:0060122	inner ear receptor cell stereocilium organization	biological_process	8	0.0381751	ENSRNOG00000013641	Myo7a	myosin VIIA [Source:RGD Symbol;Acc:628830]	1.16161	0.900417	1.40572	0.61878	0.548688	0.42358	2.17954	1.12402	up
GO:0006935	chemotaxis	biological_process	5	0.0389451	ENSRNOG00000010906	Ccl5	C-C motif chemokine ligand 5 [Source:RGD Symbol;Acc:69069]	48.3284	41.7605	33.5398	89.039	63.5136	135.101	0.429784	-1.21832	down
GO:0006935	chemotaxis	biological_process	5	0.0389451	ENSRNOG00000011557	S100a8	S100 calcium binding protein A8 [Source:RGD Symbol;Acc:620265]	6.86219	14.8878	7.83776	25.2298	19.4616	46.9158	0.322986	-1.63046	down
GO:0006935	chemotaxis	biological_process	5	0.0389451	ENSRNOG00000033234	Ccrl2	C-C motif chemokine receptor like 2 [Source:RGD Symbol;Acc:1311811]	7.3731	6.65768	5.30731	12.9877	11.6706	14.5202	0.493589	-1.01862	down
GO:0006935	chemotaxis	biological_process	5	0.0389451	ENSRNOG00000048239	Cxcr1	C-X-C motif chemokine receptor 1 [Source:RGD Symbol;Acc:2905]	12.0581	12.2964	6.19431	5.02716	3.39089	4.10572	2.43926	1.28645	up
GO:0006879	cellular iron ion homeostasis	biological_process	12	0.0397858	ENSRNOG00000014117	Hmox1	heme oxygenase 1 [Source:RGD Symbol;Acc:2806]	31.9406	70.2869	56.3487	14.3785	22.3463	16.8387	2.96053	1.56586	up
GO:0006879	cellular iron ion homeostasis	biological_process	12	0.0397858	ENSRNOG00000031506	Ftl1	ferritin light chain 1 [Source:RGD Symbol;Acc:61813]	52.0288	52.2376	40.6289	19.4586	27.1585	22.9462	2.08293	1.05861	up
GO:0006879	cellular iron ion homeostasis	biological_process	12	0.0397858	ENSRNOG00000033776	LOC100359668	ferritin light chain 2 [Source:RGD Symbol;Acc:2325062]	18.2062	15.2948	13.275	6.91254	7.86972	8.32579	2.02423	1.01737	up
GO:0005886	plasma membrane	cellular_component	4	0.0409534	ENSRNOG00000002978	Faslg	Fas ligand [Source:RGD Symbol;Acc:3880]	0.709471	0.473535	1.27202	2.10948	1.83509	3.11962	0.347531	-1.52479	down
GO:0005886	plasma membrane	cellular_component	4	0.0409534	ENSRNOG00000003298	Cd247	Cd247 molecule [Source:RGD Symbol;Acc:2305]	3.42781	2.27339	3.39083	5.96858	4.58895	7.66207	0.499025	-1.00282	down
GO:0005886	plasma membrane	cellular_component	4	0.0409534	ENSRNOG00000003888	Rgs13	regulator of G-protein signaling 13 [Source:RGD Symbol;Acc:1562103]	0.928761	0.388512	1.24146	2.64531	2.41241	3.42196	0.301749	-1.72858	down
GO:0005886	plasma membrane	cellular_component	4	0.0409534	ENSRNOG00000006093	LRRTM1	leucine rich repeat transmembrane neuronal 1 [Source:RGD Symbol;Acc:1585921]	0.125443	0.154939	0.134368	0	0.01746	0	23.7543	4.57012	up
GO:0005886	plasma membrane	cellular_component	4	0.0409534	ENSRNOG00000006426	Syt1	synaptotagmin 1 [Source:RGD Symbol;Acc:3803]	0.535581	0.254328	0.726439	1.20032	1.83951	1.33849	0.346332	-1.52977	down
GO:0005886	plasma membrane	cellular_component	4	0.0409534	ENSRNOG00000006639	Scn9a	sodium voltage-gated channel alpha subunit 9 [Source:RGD Symbol;Acc:69368]	0.00415055	0.00708024	0.083853	0	0	0	316.946	8.30809	up
GO:0005886	plasma membrane	cellular_component	4	0.0409534	ENSRNOG00000007567	Rem1	RRAD and GEM like GTPase 1 [Source:RGD Symbol;Acc:1306560]	5.33259	7.86326	4.63279	1.96558	1.8502	2.80629	2.69231	1.42884	up
GO:0005886	plasma membrane	cellular_component	4	0.0409534	ENSRNOG00000008816	Gpnmb	glycoprotein nmb [Source:RGD Symbol;Acc:71008]	193.456	246.629	303.418	84.0387	88.9556	65.1415	3.12218	1.64255	up
GO:0005886	plasma membrane	cellular_component	4	0.0409534	ENSRNOG00000008847	Gja3	gap junction protein, alpha 3 [Source:RGD Symbol;Acc:621820]	0.349941	1.33511	0.943374	0.245536	0.233594	0.190604	3.92459	1.97254	up
GO:0005886	plasma membrane	cellular_component	4	0.0409534	ENSRNOG00000010268	Vom2r44	vomeronasal 2 receptor 44 [Source:RGD Symbol;Acc:708515]	0.097324	0.555759	0.388232	0.070268	0.102233	0.085323	4.03886	2.01395	up
GO:0005886	plasma membrane	cellular_component	4	0.0409534	ENSRNOG00000011557	S100a8	S100 calcium binding protein A8 [Source:RGD Symbol;Acc:620265]	6.86219	14.8878	7.83776	25.2298	19.4616	46.9158	0.322986	-1.63046	down
GO:0005886	plasma membrane	cellular_component	4	0.0409534	ENSRNOG00000011824	Trh	thyrotropin releasing hormone [Source:RGD Symbol;Acc:3903]	0.198757	0.928469	2.94448	0	0.220139	0.033459	16.0558	4.00502	up
GO:0005886	plasma membrane	cellular_component	4	0.0409534	ENSRNOG00000012286	Il20ra	interleukin 20 receptor subunit alpha [Source:RGD Symbol;Acc:1307335]	0	0	0.758235	0	0	0	2527.45	11.3035	up
GO:0005886	plasma membrane	cellular_component	4	0.0409534	ENSRNOG00000012442	Cemip	cell migration inducing hyaluronidase [Source:RGD Symbol;Acc:1305254]	4.17147	5.86685	2.59443	1.03326	1.02633	1.30613	3.75336	1.90818	up
GO:0005886	plasma membrane	cellular_component	4	0.0409534	ENSRNOG00000013481	Cdh11	cadherin 11 [Source:RGD Symbol;Acc:619742]	13.9402	23.495	20.613	7.8593	11.181	7.5212	2.18543	1.12791	up
GO:0005886	plasma membrane	cellular_component	4	0.0409534	ENSRNOG00000013578	Trem2	triggering receptor expressed on myeloid cells 2 [Source:RGD Symbol;Acc:1309841]	7.38714	14.2293	26.9458	3.19457	3.44342	4.12088	4.51369	2.17431	up
GO:0005886	plasma membrane	cellular_component	4	0.0409534	ENSRNOG00000014117	Hmox1	heme oxygenase 1 [Source:RGD Symbol;Acc:2806]	31.9406	70.2869	56.3487	14.3785	22.3463	16.8387	2.96053	1.56586	up
GO:0005886	plasma membrane	cellular_component	4	0.0409534	ENSRNOG00000014170	Dbn1	drebrin 1 [Source:RGD Symbol;Acc:70885]	10.9214	12.9572	10.2577	6.1132	4.51819	6.14413	2.03489	1.02495	up
GO:0005886	plasma membrane	cellular_component	4	0.0409534	ENSRNOG00000014603	Sgcg	sarcoglycan, gamma [Source:RGD Symbol;Acc:1359577]	6.63542	9.15155	9.08626	2.51035	4.13368	4.90106	2.15444	1.10731	up
GO:0005886	plasma membrane	cellular_component	4	0.0409534	ENSRNOG00000015131	Ube2c	ubiquitin-conjugating enzyme E2C [Source:RGD Symbol;Acc:1305382]	1.0802	2.16214	1.89892	0.453385	0.352019	0.668492	3.48821	1.80249	up
GO:0005886	plasma membrane	cellular_component	4	0.0409534	ENSRNOG00000015408	Vil1	villin 1 [Source:RGD Symbol;Acc:1307048]	0.852	0.23051	0.408527	1.89595	1.63924	3.09661	0.224832	-2.15308	down
GO:0005886	plasma membrane	cellular_component	4	0.0409534	ENSRNOG00000015972	Ano5	anoctamin 5 [Source:MGI Symbol;Acc:MGI:3576659]	0.209885	0.228624	0.205741	0.565561	0.631479	0.538105	0.371295	-1.42936	down
GO:0005886	plasma membrane	cellular_component	4	0.0409534	ENSRNOG00000016632	Dsg3	desmoglein 3 [Source:RGD Symbol;Acc:1592103]	0.730607	1.46764	1.2487	0.486876	0.583329	0.606895	2.0553	1.03935	up
GO:0005886	plasma membrane	cellular_component	4	0.0409534	ENSRNOG00000016945	Pla2g2a	phospholipase A2 group IIA [Source:RGD Symbol;Acc:620857]	31.8882	19.843	49.1573	12.1527	19.2349	10.06	2.43412	1.2834	up
GO:0005886	plasma membrane	cellular_component	4	0.0409534	ENSRNOG00000017606	P2rx1	purinergic receptor P2X 1 [Source:RGD Symbol;Acc:3240]	7.18568	9.04786	9.01957	19.2409	13.9678	19.8251	0.476169	-1.07045	down
GO:0005886	plasma membrane	cellular_component	4	0.0409534	ENSRNOG00000017775	Slc5a1	solute carrier family 5 member 1 [Source:RGD Symbol;Acc:3713]	5.02389	3.24643	3.5349	9.53507	10.2527	6.94576	0.441589	-1.17922	down
GO:0005886	plasma membrane	cellular_component	4	0.0409534	ENSRNOG00000018458	Ncr1	natural cytotoxicity triggering receptor 1 [Source:RGD Symbol;Acc:621288]	1.96699	1.6244	1.639	4.69858	2.21644	4.77204	0.447536	-1.15992	down
GO:0005886	plasma membrane	cellular_component	4	0.0409534	ENSRNOG00000019587	Ptprn	protein tyrosine phosphatase, receptor type, N [Source:RGD Symbol;Acc:620777]	0.404913	0.311202	1.36381	0.178802	0.024688	0.090892	7.0654	2.82077	up
GO:0005886	plasma membrane	cellular_component	4	0.0409534	ENSRNOG00000020901	S1pr5	sphingosine-1-phosphate receptor 5 [Source:RGD Symbol;Acc:620566]	1.96026	1.50384	1.86566	3.51863	3.70608	6.33429	0.393078	-1.34711	down
GO:0005886	plasma membrane	cellular_component	4	0.0409534	ENSRNOG00000021546	Sit1	signaling threshold regulating transmembrane adaptor 1 [Source:RGD Symbol;Acc:1559919]	1.07776	0.720659	1.29333	2.51028	1.88185	3.02458	0.416862	-1.26236	down
GO:0005886	plasma membrane	cellular_component	4	0.0409534	ENSRNOG00000021663	Vxn	vexin [Source:RGD Symbol;Acc:1561849]	0.155554	0.192007	0.841441	0.04963	0.05983	0.051154	7.40285	2.88808	up
GO:0005886	plasma membrane	cellular_component	4	0.0409534	ENSRNOG00000022533	Micall2	MICAL-like 2 [Source:RGD Symbol;Acc:1307875]	2.02891	2.05633	4.06871	1.46972	0.930644	1.29824	2.2046	1.14052	up
GO:0005886	plasma membrane	cellular_component	4	0.0409534	ENSRNOG00000024578	Ttyh2	tweety family member 2 [Source:RGD Symbol;Acc:1562969]	7.71331	7.85453	7.28898	3.37533	3.38135	3.32008	2.26827	1.18159	up
GO:0005886	plasma membrane	cellular_component	4	0.0409534	ENSRNOG00000026238	Insyn1	inhibitory synaptic factor 1 [Source:RGD Symbol;Acc:1562618]	2.6079	3.72146	2.943	1.30836	1.7218	0.825193	2.40507	1.26608	up
GO:0005886	plasma membrane	cellular_component	4	0.0409534	ENSRNOG00000026704	Drp2	dystrophin related protein 2 [Source:RGD Symbol;Acc:621750]	4.13756	3.47252	6.62276	2.85545	2.30663	1.48257	2.142	1.09896	up
GO:0005886	plasma membrane	cellular_component	4	0.0409534	ENSRNOG00000027542	LOC100302465	hypothetical LOC100302465 [Source:RGD Symbol;Acc:2311471]	0.0181206	0	0.0289175	0.163897	0.206534	0.260131	0.0745972	-3.74474	down
GO:0005886	plasma membrane	cellular_component	4	0.0409534	ENSRNOG00000030210	Fndc1	fibronectin type III domain containing 1 [Source:RGD Symbol;Acc:1310640]	7.27699	15.3231	10.2437	1.47901	0.612771	1.6005	8.89525	3.15303	up
GO:0005886	plasma membrane	cellular_component	4	0.0409534	ENSRNOG00000030515	Nfasc	neurofascin [Source:RGD Symbol;Acc:620911]	0.0215103	0.0189856	0.293672	0.00693821	0.00924876	0	20.6443	4.36767	up
GO:0005886	plasma membrane	cellular_component	4	0.0409534	ENSRNOG00000030537	Slc26a11	solute carrier family 26 member 11 [Source:RGD Symbol;Acc:1306178]	6.84628	6.70089	8.1726	4.02064	3.4052	3.16109	2.05157	1.03673	up
GO:0005886	plasma membrane	cellular_component	4	0.0409534	ENSRNOG00000031249	Slco1a2	solute carrier organic anion transporter family, member 1A2 [Source:RGD Symbol;Acc:70985]	8.01298	7.7205	7.23905	17.1036	14.73	19.8891	0.444148	-1.17089	down
GO:0005886	plasma membrane	cellular_component	4	0.0409534	ENSRNOG00000031536	Syndig1	synapse differentiation inducing 1 [Source:RGD Symbol;Acc:1310753]	3.11116	2.77016	1.96867	5.58928	6.40608	5.16542	0.457438	-1.12835	down
GO:0005886	plasma membrane	cellular_component	4	0.0409534	ENSRNOG00000032871	Mlc1	modulator of VRAC current 1 [Source:RGD Symbol;Acc:1308552]	2.77574	1.49853	1.20774	4.12707	7.92023	3.89051	0.343963	-1.53968	down
GO:0005886	plasma membrane	cellular_component	4	0.0409534	ENSRNOG00000033658	Kntc1	kinetochore associated 1 [Source:RGD Symbol;Acc:1307905]	0.530284	1.09944	1.28499	0.561977	0.273268	0.368844	2.42068	1.27541	up
GO:0005886	plasma membrane	cellular_component	4	0.0409534	ENSRNOG00000033837	Cdh9	cadherin 9 [Source:RGD Symbol;Acc:1308343]	0	0	0	0.210953	0.147315	0.112743	0.000636928	-10.6166	down
GO:0005886	plasma membrane	cellular_component	4	0.0409534	ENSRNOG00000036984	Slco1a1	solute carrier organic anion transporter family, member 1a1 [Source:RGD Symbol;Acc:3700]	0.317929	0.628859	0.396718	0.058162	0.110115	0.019966	7.13708	2.83533	up
GO:0005886	plasma membrane	cellular_component	4	0.0409534	ENSRNOG00000037563	Cd68	Cd68 molecule [Source:RGD Symbol;Acc:1305970]	75.5859	71.5358	91.732	32.3381	37.7388	35.3836	2.26486	1.17942	up
GO:0005886	plasma membrane	cellular_component	4	0.0409534	ENSRNOG00000045595	Tnfsf9	TNF superfamily member 9 [Source:RGD Symbol;Acc:727974]	1.37669	1.19038	1.76987	0.488094	0.275907	0.330177	3.96364	1.98683	up
GO:0005886	plasma membrane	cellular_component	4	0.0409534	ENSRNOG00000048145	Sstr1	somatostatin receptor 1 [Source:RGD Symbol;Acc:3762]	0.23218	0.180356	0.12633	0.504885	0.640927	0.601976	0.308313	-1.69753	down
GO:0005886	plasma membrane	cellular_component	4	0.0409534	ENSRNOG00000048239	Cxcr1	C-X-C motif chemokine receptor 1 [Source:RGD Symbol;Acc:2905]	12.0581	12.2964	6.19431	5.02716	3.39089	4.10572	2.43926	1.28645	up
GO:0005886	plasma membrane	cellular_component	4	0.0409534	ENSRNOG00000050220	Nrxn1	neurexin 1 [Source:RGD Symbol;Acc:628659]	0.558072	0.451492	0.290124	1.63738	1.09146	0.868123	0.36133	-1.46861	down
GO:0005886	plasma membrane	cellular_component	4	0.0409534	ENSRNOG00000050998	AABR07044397		0	10.0785	0	0	0	0	33594.9	15.036	up
GO:0005886	plasma membrane	cellular_component	4	0.0409534	ENSRNOG00000051854	Enpep	glutamyl aminopeptidase [Source:RGD Symbol;Acc:621228]	18.815	14.6776	10.9005	33.2081	30.5951	30.1322	0.472593	-1.08133	down
GO:0005886	plasma membrane	cellular_component	4	0.0409534	ENSRNOG00000052498	Grb14	growth factor receptor bound protein 14 [Source:RGD Symbol;Acc:61869]	3.63754	5.12271	7.05952	3.0236	2.25713	1.48807	2.33716	1.22476	up
GO:0005886	plasma membrane	cellular_component	4	0.0409534	ENSRNOG00000052803	Klri1	killer cell lectin-like receptor family I member 1 [Source:RGD Symbol;Acc:1359344]	1.92676	2.04797	2.17747	4.23308	3.18298	6.56409	0.440067	-1.18421	down
GO:0005886	plasma membrane	cellular_component	4	0.0409534	ENSRNOG00000058692	Slc26a4	solute carrier family 26 member 4 [Source:RGD Symbol;Acc:3293]	4.03381	8.98354	10.6969	1.03707	0.715431	0.934049	8.82701	3.14192	up
GO:0005886	plasma membrane	cellular_component	4	0.0409534	ENSRNOG00000058714	Klre1	killer cell lectin-like receptor, family E, member 1 [Source:RGD Symbol;Acc:727903]	1.41711	1.79425	1.54913	5.00401	2.61277	6.33873	0.341119	-1.55165	down
GO:0005886	plasma membrane	cellular_component	4	0.0409534	ENSRNOG00000060246	Klrd1	killer cell lectin like receptor D1 [Source:RGD Symbol;Acc:2978]	3.34348	2.3231	3.44577	7.56228	4.74204	9.73844	0.413394	-1.27441	down
GO:0030041	actin filament polymerization	biological_process	8	0.0415904	ENSRNOG00000015408	Vil1	villin 1 [Source:RGD Symbol;Acc:1307048]	0.852	0.23051	0.408527	1.89595	1.63924	3.09661	0.224832	-2.15308	down
GO:0030041	actin filament polymerization	biological_process	8	0.0415904	ENSRNOG00000022533	Micall2	MICAL-like 2 [Source:RGD Symbol;Acc:1307875]	2.02891	2.05633	4.06871	1.46972	0.930644	1.29824	2.2046	1.14052	up
GO:0046930	pore complex	cellular_component	5	0.0415904	ENSRNOG00000015410	Aspnl1	asporin-like 1 [Source:RGD Symbol;Acc:9278606]	5.47451	7.94654	9.04123	1.47136	1.33332	2.2312	4.46045	2.15719	up
GO:0046930	pore complex	cellular_component	5	0.0415904	ENSRNOG00000050431	Aspn	asporin [Source:RGD Symbol;Acc:1549776]	4.35686	7.07341	9.51473	1.40718	1.43709	1.43879	4.8902	2.28989	up
GO:0034332	adherens junction organization	biological_process	6	0.0415904	ENSRNOG00000013481	Cdh11	cadherin 11 [Source:RGD Symbol;Acc:619742]	13.9402	23.495	20.613	7.8593	11.181	7.5212	2.18543	1.12791	up
GO:0034332	adherens junction organization	biological_process	6	0.0415904	ENSRNOG00000033837	Cdh9	cadherin 9 [Source:RGD Symbol;Acc:1308343]	0	0	0	0.210953	0.147315	0.112743	0.000636928	-10.6166	down
GO:1990782	protein tyrosine kinase binding	molecular_function	8	0.0415904	ENSRNOG00000003298	Cd247	Cd247 molecule [Source:RGD Symbol;Acc:2305]	3.42781	2.27339	3.39083	5.96858	4.58895	7.66207	0.499025	-1.00282	down
GO:1990782	protein tyrosine kinase binding	molecular_function	8	0.0415904	ENSRNOG00000032247	Bank1	B-cell scaffold protein with ankyrin repeats 1 [Source:RGD Symbol;Acc:1564639]	5.5174	3.95656	3.67413	8.59685	9.43	8.91938	0.487938	-1.03523	down
GO:0042277	peptide binding	molecular_function	5	0.0417741	ENSRNOG00000004757	Tmem158	transmembrane protein 158 [Source:RGD Symbol;Acc:708473]	5.30168	5.05016	6.09187	1.49572	2.71212	1.95615	2.6677	1.4156	up
GO:0042277	peptide binding	molecular_function	5	0.0417741	ENSRNOG00000020563	Cma1	chymase 1 [Source:RGD Symbol;Acc:2365]	1.06288	11.2426	14.4618	0.948545	1.00838	1.53025	7.6759	2.94034	up
GO:0042277	peptide binding	molecular_function	5	0.0417741	ENSRNOG00000048145	Sstr1	somatostatin receptor 1 [Source:RGD Symbol;Acc:3762]	0.23218	0.180356	0.12633	0.504885	0.640927	0.601976	0.308313	-1.69753	down
GO:0031526	brush border membrane	cellular_component	6	0.0417741	ENSRNOG00000017775	Slc5a1	solute carrier family 5 member 1 [Source:RGD Symbol;Acc:3713]	5.02389	3.24643	3.5349	9.53507	10.2527	6.94576	0.441589	-1.17922	down
GO:0031526	brush border membrane	cellular_component	6	0.0417741	ENSRNOG00000031249	Slco1a2	solute carrier organic anion transporter family, member 1A2 [Source:RGD Symbol;Acc:70985]	8.01298	7.7205	7.23905	17.1036	14.73	19.8891	0.444148	-1.17089	down
GO:0031526	brush border membrane	cellular_component	6	0.0417741	ENSRNOG00000058692	Slc26a4	solute carrier family 26 member 4 [Source:RGD Symbol;Acc:3293]	4.03381	8.98354	10.6969	1.03707	0.715431	0.934049	8.82701	3.14192	up
GO:0032607	interferon-alpha production	biological_process	6	0.0438012	ENSRNOG00000017414	Irf7	interferon regulatory factor 7 [Source:RGD Symbol;Acc:1307828]	50.0909	39.3499	31.835	103.562	77.9961	166.957	0.347979	-1.52293	down
GO:0046483	heterocycle metabolic process	biological_process	5	0.0438012	ENSRNOG00000012458	Cyp2e1	cytochrome P450, family 2, subfamily e, polypeptide 1 [Source:RGD Symbol;Acc:2475]	5.70974	4.74285	4.83838	17.7295	21.6301	20.9411	0.253579	-1.97949	down
GO:0021533	cell differentiation in hindbrain	biological_process	6	0.0438012	ENSRNOG00000023683	Nog	noggin [Source:RGD Symbol;Acc:3183]	1.3224	2.21724	1.19676	0.464518	0.534484	0.368221	3.46425	1.79254	up
GO:0022829	wide pore channel activity	molecular_function	7	0.0438012	ENSRNOG00000000562	Prf1	perforin 1 [Source:RGD Symbol;Acc:708463]	11.7317	8.28855	6.91728	21.9426	12.0857	30.3654	0.418325	-1.2573	down
GO:1904399	heparan sulfate binding	molecular_function	6	0.0438012	ENSRNOG00000023148	Col11a1	collagen type XI alpha 1 chain [Source:RGD Symbol;Acc:2372]	0.411087	0.52551	0.885577	0.224042	0.278554	0.247892	2.42799	1.27976	up
GO:0015218	pyrimidine nucleotide transmembrane transporter activity	molecular_function	7	0.0438012	ENSRNOG00000016949	Slc25a33	solute carrier family 25 member 33 [Source:RGD Symbol;Acc:1583942]	16.1568	14.3339	12.404	29.8604	28.5655	33.4012	0.467124	-1.09812	down
GO:0098904	regulation of AV node cell action potential	biological_process	7	0.0438012	ENSRNOG00000017060	Ryr2	ryanodine receptor 2 [Source:RGD Symbol;Acc:620314]	0.285075	0.300051	1.47817	0.173643	0.049516	0.188027	5.01792	2.32709	up
GO:0002859	negative regulation of natural killer cell mediated cytotoxicity directed against tumor cell target	biological_process	12	0.0438012	ENSRNOG00000058714	Klre1	killer cell lectin-like receptor, family E, member 1 [Source:RGD Symbol;Acc:727903]	1.41711	1.79425	1.54913	5.00401	2.61277	6.33873	0.341119	-1.55165	down
GO:0031752	D5 dopamine receptor binding	molecular_function	8	0.0438012	ENSRNOG00000028404	Ppp1r1b	protein phosphatase 1, regulatory (inhibitor) subunit 1B [Source:RGD Symbol;Acc:621859]	22.4231	7.67647	15.2862	32.2533	35.5582	36.4644	0.435248	-1.20009	down
GO:0060369	positive regulation of Fc receptor mediated stimulatory signaling pathway	biological_process	9	0.0438012	ENSRNOG00000038197	Cd226	CD226 molecule [Source:RGD Symbol;Acc:1311513]	0.859597	0.545065	0.951736	1.53046	1.35368	1.85631	0.497084	-1.00844	down
GO:0033005	positive regulation of mast cell activation	biological_process	8	0.0438012	ENSRNOG00000038197	Cd226	CD226 molecule [Source:RGD Symbol;Acc:1311513]	0.859597	0.545065	0.951736	1.53046	1.35368	1.85631	0.497084	-1.00844	down
GO:0001845	phagolysosome assembly	biological_process	9	0.0438012	ENSRNOG00000013641	Myo7a	myosin VIIA [Source:RGD Symbol;Acc:628830]	1.16161	0.900417	1.40572	0.61878	0.548688	0.42358	2.17954	1.12402	up
GO:2000345	regulation of hepatocyte proliferation	biological_process	8	0.0438012	ENSRNOG00000025120	Gli1	GLI family zinc finger 1 [Source:RGD Symbol;Acc:621673]	3.07771	4.09095	3.67171	1.56395	1.68971	1.52278	2.26955	1.18241	up
GO:0002003	angiotensin maturation	biological_process	9	0.0438012	ENSRNOG00000051854	Enpep	glutamyl aminopeptidase [Source:RGD Symbol;Acc:621228]	18.815	14.6776	10.9005	33.2081	30.5951	30.1322	0.472593	-1.08133	down
GO:0032232	negative regulation of actin filament bundle assembly	biological_process	7	0.0438012	ENSRNOG00000014170	Dbn1	drebrin 1 [Source:RGD Symbol;Acc:70885]	10.9214	12.9572	10.2577	6.1132	4.51819	6.14413	2.03489	1.02495	up
GO:0030348	syntaxin-3 binding	molecular_function	7	0.0438012	ENSRNOG00000006426	Syt1	synaptotagmin 1 [Source:RGD Symbol;Acc:3803]	0.535581	0.254328	0.726439	1.20032	1.83951	1.33849	0.346332	-1.52977	down
GO:1903237	negative regulation of leukocyte tethering or rolling	biological_process	9	0.0438012	ENSRNOG00000034290	Ccl21	C-C motif chemokine ligand 21 [Source:RGD Symbol;Acc:1311996]	71.933	100.476	149.957	63.5991	39.5568	57.0998	2.01157	1.00832	up
GO:0016321	female meiosis chromosome segregation	biological_process	5	0.0438012	ENSRNOG00000029055	Ttk	Ttk protein kinase [Source:RGD Symbol;Acc:1305558]	0.567316	1.43363	1.35383	0.510706	0.373299	0.471024	2.4758	1.30789	up
GO:0006925	inflammatory cell apoptotic process	biological_process	7	0.0438012	ENSRNOG00000002978	Faslg	Fas ligand [Source:RGD Symbol;Acc:3880]	0.709471	0.473535	1.27202	2.10948	1.83509	3.11962	0.347531	-1.52479	down
GO:2000312	regulation of kainate selective glutamate receptor activity	biological_process	10	0.0438012	ENSRNOG00000014006	Neto1	neuropilin and tolloid like 1 [Source:RGD Symbol;Acc:1566269]	0.083617	0.086844	0.08791	0	0	0	861.237	9.75027	up
GO:0018119	peptidyl-cysteine S-nitrosylation	biological_process	10	0.0438012	ENSRNOG00000011557	S100a8	S100 calcium binding protein A8 [Source:RGD Symbol;Acc:620265]	6.86219	14.8878	7.83776	25.2298	19.4616	46.9158	0.322986	-1.63046	down
GO:0021938	smoothened signaling pathway involved in regulation of cerebellar granule cell precursor cell proliferation	biological_process	7	0.0438012	ENSRNOG00000025120	Gli1	GLI family zinc finger 1 [Source:RGD Symbol;Acc:621673]	3.07771	4.09095	3.67171	1.56395	1.68971	1.52278	2.26955	1.18241	up
GO:0034505	tooth mineralization	biological_process	7	0.0438012	ENSRNOG00000003897	Col1a1	collagen type I alpha 1 chain [Source:RGD Symbol;Acc:61817]	126.27	249.911	273.591	58.1167	63.4283	51.677	3.75109	1.90731	up
GO:0030297	transmembrane receptor protein tyrosine kinase activator activity	molecular_function	9	0.0438012	ENSRNOG00000026053	Grem1	gremlin 1, DAN family BMP antagonist [Source:RGD Symbol;Acc:2359]	0.95987	2.57523	2.25854	0.284014	0.14634	0.159551	9.82132	3.29592	up
GO:0003331	positive regulation of extracellular matrix constituent secretion	biological_process	9	0.0438012	ENSRNOG00000010935	Cpb2	carboxypeptidase B2 [Source:RGD Symbol;Acc:71035]	0.417813	0.940398	0.194739	0	0	0	5176.5	12.3378	up
GO:0033363	secretory granule organization	biological_process	7	0.0438012	ENSRNOG00000015461	Serpine2	serpin family E member 2 [Source:RGD Symbol;Acc:3748]	21.8704	32.5856	37.2124	17.0684	13.4899	15.117	2.00695	1.00501	up
GO:1990502	dense core granule maturation	biological_process	6	0.0438012	ENSRNOG00000019587	Ptprn	protein tyrosine phosphatase, receptor type, N [Source:RGD Symbol;Acc:620777]	0.404913	0.311202	1.36381	0.178802	0.024688	0.090892	7.0654	2.82077	up
GO:0005146	leukemia inhibitory factor receptor binding	molecular_function	7	0.0438012	ENSRNOG00000007002	Lif	LIF, interleukin 6 family cytokine [Source:RGD Symbol;Acc:620865]	0.880568	1.01865	1.04408	0.472627	0.322036	0.294568	2.70218	1.43413	up
GO:0007079	mitotic chromosome movement towards spindle pole	biological_process	7	0.0438012	ENSRNOG00000009339	Cenpe	centromere protein E [Source:RGD Symbol;Acc:1307115]	0.788656	1.3332	1.09251	0.574257	0.391805	0.597516	2.05577	1.03968	up
GO:0002689	negative regulation of leukocyte chemotaxis	biological_process	8	0.0438012	ENSRNOG00000026053	Grem1	gremlin 1, DAN family BMP antagonist [Source:RGD Symbol;Acc:2359]	0.95987	2.57523	2.25854	0.284014	0.14634	0.159551	9.82132	3.29592	up
GO:1990049	retrograde neuronal dense core vesicle transport	biological_process	12	0.0438012	ENSRNOG00000023993	Kif1a	kinesin family member 1A [Source:RGD Symbol;Acc:1304996]	0.166506	0.124253	0.194855	0.636146	0.353681	0.430159	0.341985	-1.54799	down
GO:0042942	D-serine transport	biological_process	7	0.0438012	ENSRNOG00000010938	Slc7a10	solute carrier family 7 member 10 [Source:RGD Symbol;Acc:621672]	5.14524	4.07878	5.28848	21.1096	13.4018	15.739	0.288803	-1.79184	down
GO:0035710	CD4-positive, alpha-beta T cell activation	biological_process	9	0.0438012	ENSRNOG00000007539	Rsad2	radical S-adenosyl methionine domain containing 2 [Source:RGD Symbol;Acc:620495]	4.92785	5.735	5.77652	12.456	7.58066	14.5645	0.475111	-1.07366	down
GO:0102007	acyl-L-homoserine-lactone lactonohydrolase activity	molecular_function	8	0.0438012	ENSRNOG00000008902	Pon1	paraoxonase 1 [Source:RGD Symbol;Acc:620062]	4.94993	3.6737	3.80655	9.75741	7.38752	8.1471	0.491466	-1.02484	down
GO:1902261	positive regulation of delayed rectifier potassium channel activity	biological_process	10	0.0438012	ENSRNOG00000008176	Nppa	natriuretic peptide A [Source:RGD Symbol;Acc:3193]	0	0	4.77912	0	0	0	15930.4	13.9595	up
GO:0097149	centralspindlin complex	cellular_component	4	0.0438012	ENSRNOG00000024365	Ect2	epithelial cell transforming 2 [Source:RGD Symbol;Acc:1308524]	1.29219	2.68213	3.60527	1.27175	1.0084	0.842832	2.42703	1.27919	up
GO:0071504	cellular response to heparin	biological_process	7	0.0438012	ENSRNOG00000017783	Sfrp1	secreted frizzled-related protein 1 [Source:RGD Symbol;Acc:621074]	1.68002	2.38548	4.44256	1.64961	1.21244	0.920778	2.24913	1.16937	up
GO:0034189	very-low-density lipoprotein particle binding	molecular_function	5	0.0438012	ENSRNOG00000013578	Trem2	triggering receptor expressed on myeloid cells 2 [Source:RGD Symbol;Acc:1309841]	7.38714	14.2293	26.9458	3.19457	3.44342	4.12088	4.51369	2.17431	up
GO:1902737	dendritic filopodium	cellular_component	8	0.0438012	ENSRNOG00000014170	Dbn1	drebrin 1 [Source:RGD Symbol;Acc:70885]	10.9214	12.9572	10.2577	6.1132	4.51819	6.14413	2.03489	1.02495	up
GO:0009991	response to extracellular stimulus	biological_process	5	0.0438012	ENSRNOG00000017786	Acta1	actin, alpha 1, skeletal muscle [Source:RGD Symbol;Acc:2025]	2.06127	3.95623	4.72239	0.202559	1.39766	0.697384	4.67439	2.22478	up
GO:0071400	cellular response to oleic acid	biological_process	8	0.0438012	ENSRNOG00000013704	Cps1	carbamoyl-phosphate synthase 1 [Source:RGD Symbol;Acc:2395]	0.0296366	0.0318274	0.0321218	0	0	0	311.953	8.28518	up
GO:0022027	interkinetic nuclear migration	biological_process	8	0.0438012	ENSRNOG00000023993	Kif1a	kinesin family member 1A [Source:RGD Symbol;Acc:1304996]	0.166506	0.124253	0.194855	0.636146	0.353681	0.430159	0.341985	-1.54799	down
GO:0002554	serotonin secretion by platelet	biological_process	10	0.0438012	ENSRNOG00000017606	P2rx1	purinergic receptor P2X 1 [Source:RGD Symbol;Acc:3240]	7.18568	9.04786	9.01957	19.2409	13.9678	19.8251	0.476169	-1.07045	down
GO:1902896	terminal web assembly	biological_process	9	0.0438012	ENSRNOG00000015408	Vil1	villin 1 [Source:RGD Symbol;Acc:1307048]	0.852	0.23051	0.408527	1.89595	1.63924	3.09661	0.224832	-2.15308	down
GO:0015111	iodide transmembrane transporter activity	molecular_function	8	0.0438012	ENSRNOG00000058692	Slc26a4	solute carrier family 26 member 4 [Source:RGD Symbol;Acc:3293]	4.03381	8.98354	10.6969	1.03707	0.715431	0.934049	8.82701	3.14192	up
GO:0090187	positive regulation of pancreatic juice secretion	biological_process	9	0.0438012	ENSRNOG00000017873	Sct	secretin [Source:RGD Symbol;Acc:3643]	1.23791	1.93048	2.4561	0.102153	0.550348	0.362674	5.54041	2.46999	up
GO:1900086	positive regulation of peptidyl-tyrosine autophosphorylation	biological_process	12	0.0438012	ENSRNOG00000026053	Grem1	gremlin 1, DAN family BMP antagonist [Source:RGD Symbol;Acc:2359]	0.95987	2.57523	2.25854	0.284014	0.14634	0.159551	9.82132	3.29592	up
GO:0005427	proton-dependent oligopeptide secondary active transmembrane transporter activity	molecular_function	8	0.0438012	ENSRNOG00000011598	Slc15a1	solute carrier family 15 member 1 [Source:RGD Symbol;Acc:621736]	0.061492	0.060826	0.078949	0	0	0	670.89	9.38993	up
GO:0031106	septin ring organization	biological_process	8	0.0438012	ENSRNOG00000014343	Anln	anillin, actin binding protein [Source:RGD Symbol;Acc:1561367]	1.4585	2.69318	2.21254	1.12838	0.780269	1.10367	2.11273	1.07911	up
GO:0014054	positive regulation of gamma-aminobutyric acid secretion	biological_process	9	0.0438012	ENSRNOG00000011824	Trh	thyrotropin releasing hormone [Source:RGD Symbol;Acc:3903]	0.198757	0.928469	2.94448	0	0.220139	0.033459	16.0558	4.00502	up
GO:1990423	RZZ complex	cellular_component	4	0.0438012	ENSRNOG00000033658	Kntc1	kinetochore associated 1 [Source:RGD Symbol;Acc:1307905]	0.530284	1.09944	1.28499	0.561977	0.273268	0.368844	2.42068	1.27541	up
GO:1990519	pyrimidine nucleotide import into mitochondrion	biological_process	10	0.0438012	ENSRNOG00000016949	Slc25a33	solute carrier family 25 member 33 [Source:RGD Symbol;Acc:1583942]	16.1568	14.3339	12.404	29.8604	28.5655	33.4012	0.467124	-1.09812	down
GO:0034391	regulation of smooth muscle cell apoptotic process	biological_process	10	0.0438012	ENSRNOG00000054212	Pde1a	phosphodiesterase 1A [Source:RGD Symbol;Acc:68329]	1.57085	2.96311	2.99337	1.33966	1.12177	1.16821	2.07385	1.05231	up
GO:2000346	negative regulation of hepatocyte proliferation	biological_process	9	0.0438012	ENSRNOG00000010935	Cpb2	carboxypeptidase B2 [Source:RGD Symbol;Acc:71035]	0.417813	0.940398	0.194739	0	0	0	5176.5	12.3378	up
GO:0032507	maintenance of protein location in cell	biological_process	6	0.0438012	ENSRNOG00000014170	Dbn1	drebrin 1 [Source:RGD Symbol;Acc:70885]	10.9214	12.9572	10.2577	6.1132	4.51819	6.14413	2.03489	1.02495	up
GO:0044805	late nucleophagy	biological_process	8	0.0438012	ENSRNOG00000023449	Atg9b	autophagy related 9B [Source:RGD Symbol;Acc:1560887]	0.062881	0.105623	0.519309	0	0	0.006305	109.09	6.76938	up
GO:0060527	prostate epithelial cord arborization involved in prostate glandular acinus morphogenesis	biological_process	9	0.0438012	ENSRNOG00000017783	Sfrp1	secreted frizzled-related protein 1 [Source:RGD Symbol;Acc:621074]	1.68002	2.38548	4.44256	1.64961	1.21244	0.920778	2.24913	1.16937	up
GO:0032411	positive regulation of transporter activity	biological_process	6	0.0438012	ENSRNOG00000008902	Pon1	paraoxonase 1 [Source:RGD Symbol;Acc:620062]	4.94993	3.6737	3.80655	9.75741	7.38752	8.1471	0.491466	-1.02484	down
GO:0097454	Schwann cell microvillus	cellular_component	8	0.0438012	ENSRNOG00000030515	Nfasc	neurofascin [Source:RGD Symbol;Acc:620911]	0.0215103	0.0189856	0.293672	0.00693821	0.00924876	0	20.6443	4.36767	up
GO:0090244	Wnt signaling pathway involved in somitogenesis	biological_process	8	0.0438012	ENSRNOG00000017783	Sfrp1	secreted frizzled-related protein 1 [Source:RGD Symbol;Acc:621074]	1.68002	2.38548	4.44256	1.64961	1.21244	0.920778	2.24913	1.16937	up
GO:0030222	eosinophil differentiation	biological_process	9	0.0438012	ENSRNOG00000016804	Il25	interleukin 25 [Source:RGD Symbol;Acc:1561632]	0.051869	0.094698	0.050163	0.853721	0.318759	0.438559	0.122114	-3.0337	down
GO:0071953	elastic fiber	cellular_component	5	0.0438012	ENSRNOG00000001469	Eln	elastin [Source:RGD Symbol;Acc:67394]	1211.58	1294.86	280.806	159.291	311.13	177.739	4.30024	2.10442	up
GO:0098910	regulation of atrial cardiac muscle cell action potential	biological_process	7	0.0438012	ENSRNOG00000017060	Ryr2	ryanodine receptor 2 [Source:RGD Symbol;Acc:620314]	0.285075	0.300051	1.47817	0.173643	0.049516	0.188027	5.01792	2.32709	up
GO:1900106	positive regulation of hyaluranon cable assembly	biological_process	7	0.0438012	ENSRNOG00000059362	Has3	hyaluronan synthase 3 [Source:RGD Symbol;Acc:628656]	0.551376	0.941067	0.708262	0.367742	0.312288	0.140207	2.68301	1.42385	up
GO:0060166	olfactory pit development	biological_process	5	0.0438012	ENSRNOG00000010905	Dlx5	distal-less homeobox 5 [Source:RGD Symbol;Acc:2506]	0.333893	0.067122	0.257194	0	0	0	2194.03	11.0994	up
GO:0019932	second-messenger-mediated signaling	biological_process	6	0.0438012	ENSRNOG00000019587	Ptprn	protein tyrosine phosphatase, receptor type, N [Source:RGD Symbol;Acc:620777]	0.404913	0.311202	1.36381	0.178802	0.024688	0.090892	7.0654	2.82077	up
GO:0030298	receptor signaling protein tyrosine kinase activator activity	molecular_function	9	0.0438012	ENSRNOG00000010906	Ccl5	C-C motif chemokine ligand 5 [Source:RGD Symbol;Acc:69069]	48.3284	41.7605	33.5398	89.039	63.5136	135.101	0.429784	-1.21832	down
GO:1990048	anterograde neuronal dense core vesicle transport	biological_process	12	0.0438012	ENSRNOG00000023993	Kif1a	kinesin family member 1A [Source:RGD Symbol;Acc:1304996]	0.166506	0.124253	0.194855	0.636146	0.353681	0.430159	0.341985	-1.54799	down
GO:0099502	calcium-dependent activation of synaptic vesicle fusion	biological_process	11	0.0438012	ENSRNOG00000006426	Syt1	synaptotagmin 1 [Source:RGD Symbol;Acc:3803]	0.535581	0.254328	0.726439	1.20032	1.83951	1.33849	0.346332	-1.52977	down
GO:0070234	positive regulation of T cell apoptotic process	biological_process	12	0.0438012	ENSRNOG00000010906	Ccl5	C-C motif chemokine ligand 5 [Source:RGD Symbol;Acc:69069]	48.3284	41.7605	33.5398	89.039	63.5136	135.101	0.429784	-1.21832	down
GO:0009624	response to nematode	biological_process	7	0.0438012	ENSRNOG00000016804	Il25	interleukin 25 [Source:RGD Symbol;Acc:1561632]	0.051869	0.094698	0.050163	0.853721	0.318759	0.438559	0.122114	-3.0337	down
GO:0034769	basement membrane disassembly	biological_process	6	0.0438012	ENSRNOG00000020563	Cma1	chymase 1 [Source:RGD Symbol;Acc:2365]	1.06288	11.2426	14.4618	0.948545	1.00838	1.53025	7.6759	2.94034	up
GO:1903251	multi-ciliated epithelial cell differentiation	biological_process	7	0.0438012	ENSRNOG00000010454	Ccno	cyclin O [Source:RGD Symbol;Acc:1565217]	1.43171	1.77816	6.99599	1.16909	0.673202	0.950255	3.65468	1.86975	up
GO:0042015	interleukin-20 binding	molecular_function	6	0.0438012	ENSRNOG00000012286	Il20ra	interleukin 20 receptor subunit alpha [Source:RGD Symbol;Acc:1307335]	0	0	0.758235	0	0	0	2527.45	11.3035	up
GO:0071205	protein localization to juxtaparanode region of axon	biological_process	7	0.0438012	ENSRNOG00000030515	Nfasc	neurofascin [Source:RGD Symbol;Acc:620911]	0.0215103	0.0189856	0.293672	0.00693821	0.00924876	0	20.6443	4.36767	up
GO:1900212	negative regulation of mesenchymal cell apoptotic process involved in metanephros development	biological_process	10	0.0438012	ENSRNOG00000026203	Pax8	paired box 8 [Source:RGD Symbol;Acc:620434]	0.679274	0.646556	1.36295	0.21796	0.383172	0.130189	3.6766	1.87837	up
GO:0060513	prostatic bud formation	biological_process	8	0.0438012	ENSRNOG00000023683	Nog	noggin [Source:RGD Symbol;Acc:3183]	1.3224	2.21724	1.19676	0.464518	0.534484	0.368221	3.46425	1.79254	up
GO:0045226	extracellular polysaccharide biosynthetic process	biological_process	9	0.0438012	ENSRNOG00000059362	Has3	hyaluronan synthase 3 [Source:RGD Symbol;Acc:628656]	0.551376	0.941067	0.708262	0.367742	0.312288	0.140207	2.68301	1.42385	up
GO:0033687	osteoblast proliferation	biological_process	4	0.0438012	ENSRNOG00000004440	Fignl1	fidgetin-like 1 [Source:RGD Symbol;Acc:1307112]	1.25489	1.98283	1.32425	0.558773	0.422531	0.693617	2.72369	1.44556	up
GO:2000110	negative regulation of macrophage apoptotic process	biological_process	11	0.0438012	ENSRNOG00000010906	Ccl5	C-C motif chemokine ligand 5 [Source:RGD Symbol;Acc:69069]	48.3284	41.7605	33.5398	89.039	63.5136	135.101	0.429784	-1.21832	down
GO:0042584	chromaffin granule membrane	cellular_component	8	0.0438012	ENSRNOG00000006426	Syt1	synaptotagmin 1 [Source:RGD Symbol;Acc:3803]	0.535581	0.254328	0.726439	1.20032	1.83951	1.33849	0.346332	-1.52977	down
GO:0045351	type I interferon biosynthetic process	biological_process	8	0.0438012	ENSRNOG00000017414	Irf7	interferon regulatory factor 7 [Source:RGD Symbol;Acc:1307828]	50.0909	39.3499	31.835	103.562	77.9961	166.957	0.347979	-1.52293	down
GO:0021696	cerebellar cortex morphogenesis	biological_process	5	0.0438012	ENSRNOG00000025120	Gli1	GLI family zinc finger 1 [Source:RGD Symbol;Acc:621673]	3.07771	4.09095	3.67171	1.56395	1.68971	1.52278	2.26955	1.18241	up
GO:0072278	metanephric comma-shaped body morphogenesis	biological_process	6	0.0438012	ENSRNOG00000026203	Pax8	paired box 8 [Source:RGD Symbol;Acc:620434]	0.679274	0.646556	1.36295	0.21796	0.383172	0.130189	3.6766	1.87837	up
GO:0001839	neural plate morphogenesis	biological_process	8	0.0438012	ENSRNOG00000023683	Nog	noggin [Source:RGD Symbol;Acc:3183]	1.3224	2.21724	1.19676	0.464518	0.534484	0.368221	3.46425	1.79254	up
GO:1904498	protein localization to mitotic actomyosin contractile ring	biological_process	10	0.0438012	ENSRNOG00000014343	Anln	anillin, actin binding protein [Source:RGD Symbol;Acc:1561367]	1.4585	2.69318	2.21254	1.12838	0.780269	1.10367	2.11273	1.07911	up
GO:0046209	nitric oxide metabolic process	biological_process	6	0.0438012	ENSRNOG00000013704	Cps1	carbamoyl-phosphate synthase 1 [Source:RGD Symbol;Acc:2395]	0.0296366	0.0318274	0.0321218	0	0	0	311.953	8.28518	up
GO:0001768	establishment of T cell polarity	biological_process	7	0.0438012	ENSRNOG00000034290	Ccl21	C-C motif chemokine ligand 21 [Source:RGD Symbol;Acc:1311996]	71.933	100.476	149.957	63.5991	39.5568	57.0998	2.01157	1.00832	up
GO:0005219	ryanodine-sensitive calcium-release channel activity	molecular_function	10	0.0438012	ENSRNOG00000017060	Ryr2	ryanodine receptor 2 [Source:RGD Symbol;Acc:620314]	0.285075	0.300051	1.47817	0.173643	0.049516	0.188027	5.01792	2.32709	up
GO:0042007	interleukin-18 binding	molecular_function	6	0.0438012	ENSRNOG00000054218	Il18rap	interleukin 18 receptor accessory protein [Source:RGD Symbol;Acc:727867]	0.952382	0.874742	0.928804	2.62494	1.36523	2.00221	0.459906	-1.12059	down
GO:0010643	cell communication by chemical coupling	biological_process	5	0.0438012	ENSRNOG00000014170	Dbn1	drebrin 1 [Source:RGD Symbol;Acc:70885]	10.9214	12.9572	10.2577	6.1132	4.51819	6.14413	2.03489	1.02495	up
GO:0051965	positive regulation of synapse assembly	biological_process	7	0.0438117	ENSRNOG00000006093	LRRTM1	leucine rich repeat transmembrane neuronal 1 [Source:RGD Symbol;Acc:1585921]	0.125443	0.154939	0.134368	0	0.01746	0	23.7543	4.57012	up
GO:0051965	positive regulation of synapse assembly	biological_process	7	0.0438117	ENSRNOG00000010529	Thbs2	thrombospondin 2 [Source:RGD Symbol;Acc:1310979]	2.57939	6.01878	6.82916	1.12399	1.12034	1.18604	4.49727	2.16905	up
GO:0051965	positive regulation of synapse assembly	biological_process	7	0.0438117	ENSRNOG00000031536	Syndig1	synapse differentiation inducing 1 [Source:RGD Symbol;Acc:1310753]	3.11116	2.77016	1.96867	5.58928	6.40608	5.16542	0.457438	-1.12835	down
GO:2001244	positive regulation of intrinsic apoptotic signaling pathway	biological_process	10	0.0451156	ENSRNOG00000011483	S100a9	S100 calcium binding protein A9 [Source:RGD Symbol;Acc:620267]	20.221	25.7548	22.6237	43.4388	35.8205	91.6187	0.401453	-1.3167	down
GO:2001244	positive regulation of intrinsic apoptotic signaling pathway	biological_process	10	0.0451156	ENSRNOG00000011557	S100a8	S100 calcium binding protein A8 [Source:RGD Symbol;Acc:620265]	6.86219	14.8878	7.83776	25.2298	19.4616	46.9158	0.322986	-1.63046	down
GO:0070830	bicellular tight junction assembly	biological_process	9	0.0451156	ENSRNOG00000022533	Micall2	MICAL-like 2 [Source:RGD Symbol;Acc:1307875]	2.02891	2.05633	4.06871	1.46972	0.930644	1.29824	2.2046	1.14052	up
GO:0070830	bicellular tight junction assembly	biological_process	9	0.0451156	ENSRNOG00000024365	Ect2	epithelial cell transforming 2 [Source:RGD Symbol;Acc:1308524]	1.29219	2.68213	3.60527	1.27175	1.0084	0.842832	2.42703	1.27919	up
GO:0000070	mitotic sister chromatid segregation	biological_process	8	0.0451156	ENSRNOG00000004487	Nek2	NIMA (never in mitosis gene a)-related kinase 2-like 1 [Source:RGD Symbol;Acc:1582899]	1.56838	1.81988	3.87627	0.970926	0.827985	1.08667	2.51752	1.33201	up
GO:0000070	mitotic sister chromatid segregation	biological_process	8	0.0451156	ENSRNOG00000009334	Knstrn	kinetochore-localized astrin/SPAG5 binding protein [Source:RGD Symbol;Acc:1303240]	2.00772	2.65504	3.12539	0.916384	0.953023	0.774118	2.94612	1.55882	up
GO:0016493	C-C chemokine receptor activity	molecular_function	9	0.0451156	ENSRNOG00000033234	Ccrl2	C-C motif chemokine receptor like 2 [Source:RGD Symbol;Acc:1311811]	7.3731	6.65768	5.30731	12.9877	11.6706	14.5202	0.493589	-1.01862	down
GO:0016493	C-C chemokine receptor activity	molecular_function	9	0.0451156	ENSRNOG00000048239	Cxcr1	C-X-C motif chemokine receptor 1 [Source:RGD Symbol;Acc:2905]	12.0581	12.2964	6.19431	5.02716	3.39089	4.10572	2.43926	1.28645	up
GO:0016339	calcium-dependent cell-cell adhesion via plasma membrane cell adhesion molecules	biological_process	7	0.0451156	ENSRNOG00000013481	Cdh11	cadherin 11 [Source:RGD Symbol;Acc:619742]	13.9402	23.495	20.613	7.8593	11.181	7.5212	2.18543	1.12791	up
GO:0016339	calcium-dependent cell-cell adhesion via plasma membrane cell adhesion molecules	biological_process	7	0.0451156	ENSRNOG00000033837	Cdh9	cadherin 9 [Source:RGD Symbol;Acc:1308343]	0	0	0	0.210953	0.147315	0.112743	0.000636928	-10.6166	down
GO:0044853	plasma membrane raft	cellular_component	7	0.0451156	ENSRNOG00000004177	Myo1a	myosin IA [Source:RGD Symbol;Acc:3135]	0.621574	0.513884	0.299639	1.36739	1.14678	1.28165	0.378073	-1.40326	down
GO:0044853	plasma membrane raft	cellular_component	7	0.0451156	ENSRNOG00000015445	Mal	mal, T-cell differentiation protein [Source:RGD Symbol;Acc:3037]	4.28993	6.10298	7.71911	8.68788	11.4303	17.2031	0.485301	-1.04305	down
GO:0005070	SH3/SH2 adaptor activity	molecular_function	7	0.0487468	ENSRNOG00000006263	Sh2d1a	SH2 domain containing 1A [Source:RGD Symbol;Acc:1562408]	0.762223	0.828636	1.31519	3.17378	2.3662	3.14758	0.334508	-1.57989	down
GO:0005070	SH3/SH2 adaptor activity	molecular_function	7	0.0487468	ENSRNOG00000052498	Grb14	growth factor receptor bound protein 14 [Source:RGD Symbol;Acc:61869]	3.63754	5.12271	7.05952	3.0236	2.25713	1.48807	2.33716	1.22476	up
GO:0004181	metallocarboxypeptidase activity	molecular_function	9	0.0487468	ENSRNOG00000010935	Cpb2	carboxypeptidase B2 [Source:RGD Symbol;Acc:71035]	0.417813	0.940398	0.194739	0	0	0	5176.5	12.3378	up
GO:0004181	metallocarboxypeptidase activity	molecular_function	9	0.0487468	ENSRNOG00000015902	Cpxm2	carboxypeptidase X (M14 family), member 2 [Source:RGD Symbol;Acc:1310955]	14.1973	36.6869	13.8658	3.88967	11.2868	7.934	2.80176	1.48633	up
GO:0021983	pituitary gland development	biological_process	7	0.0487468	ENSRNOG00000023683	Nog	noggin [Source:RGD Symbol;Acc:3183]	1.3224	2.21724	1.19676	0.464518	0.534484	0.368221	3.46425	1.79254	up
GO:0021983	pituitary gland development	biological_process	7	0.0487468	ENSRNOG00000025120	Gli1	GLI family zinc finger 1 [Source:RGD Symbol;Acc:621673]	3.07771	4.09095	3.67171	1.56395	1.68971	1.52278	2.26955	1.18241	up
GO:0042542	response to hydrogen peroxide	biological_process	7	0.0502154	ENSRNOG00000003897	Col1a1	collagen type I alpha 1 chain [Source:RGD Symbol;Acc:61817]	126.27	249.911	273.591	58.1167	63.4283	51.677	3.75109	1.90731	up
GO:0042542	response to hydrogen peroxide	biological_process	7	0.0502154	ENSRNOG00000014117	Hmox1	heme oxygenase 1 [Source:RGD Symbol;Acc:2806]	31.9406	70.2869	56.3487	14.3785	22.3463	16.8387	2.96053	1.56586	up
GO:0042542	response to hydrogen peroxide	biological_process	7	0.0502154	ENSRNOG00000021201	Txnip	thioredoxin interacting protein [Source:RGD Symbol;Acc:620886]	381.684	279.835	482.899	706.409	874.051	787.516	0.483289	-1.04904	down
GO:0007492	endoderm development	biological_process	6	0.05248	ENSRNOG00000008826	Pax9	paired box 9 [Source:RGD Symbol;Acc:1560838]	0	0	1.38816	0	0	0	4627.2	12.1759	up
GO:0007492	endoderm development	biological_process	6	0.05248	ENSRNOG00000023683	Nog	noggin [Source:RGD Symbol;Acc:3183]	1.3224	2.21724	1.19676	0.464518	0.534484	0.368221	3.46425	1.79254	up
GO:0055072	iron ion homeostasis	biological_process	11	0.05248	ENSRNOG00000013973	Lcn2	lipocalin 2 [Source:RGD Symbol;Acc:69408]	399.193	738.611	424.407	107.199	115.007	143.758	4.26876	2.09382	up
GO:0055072	iron ion homeostasis	biological_process	11	0.05248	ENSRNOG00000014117	Hmox1	heme oxygenase 1 [Source:RGD Symbol;Acc:2806]	31.9406	70.2869	56.3487	14.3785	22.3463	16.8387	2.96053	1.56586	up
GO:0030507	spectrin binding	molecular_function	6	0.05248	ENSRNOG00000013641	Myo7a	myosin VIIA [Source:RGD Symbol;Acc:628830]	1.16161	0.900417	1.40572	0.61878	0.548688	0.42358	2.17954	1.12402	up
GO:0030507	spectrin binding	molecular_function	6	0.05248	ENSRNOG00000019587	Ptprn	protein tyrosine phosphatase, receptor type, N [Source:RGD Symbol;Acc:620777]	0.404913	0.311202	1.36381	0.178802	0.024688	0.090892	7.0654	2.82077	up
GO:0046627	negative regulation of insulin receptor signaling pathway	biological_process	9	0.05248	ENSRNOG00000021294	Mstn	myostatin [Source:RGD Symbol;Acc:3115]	0.059124	1.35602	0.037337	0	0	0	4841.6	12.2413	up
GO:0046627	negative regulation of insulin receptor signaling pathway	biological_process	9	0.05248	ENSRNOG00000052498	Grb14	growth factor receptor bound protein 14 [Source:RGD Symbol;Acc:61869]	3.63754	5.12271	7.05952	3.0236	2.25713	1.48807	2.33716	1.22476	up
GO:0007093	mitotic cell cycle checkpoint	biological_process	5	0.05248	ENSRNOG00000029055	Ttk	Ttk protein kinase [Source:RGD Symbol;Acc:1305558]	0.567316	1.43363	1.35383	0.510706	0.373299	0.471024	2.4758	1.30789	up
GO:0007093	mitotic cell cycle checkpoint	biological_process	5	0.05248	ENSRNOG00000033658	Kntc1	kinetochore associated 1 [Source:RGD Symbol;Acc:1307905]	0.530284	1.09944	1.28499	0.561977	0.273268	0.368844	2.42068	1.27541	up
GO:0008198	ferrous iron binding	molecular_function	9	0.05248	ENSRNOG00000031506	Ftl1	ferritin light chain 1 [Source:RGD Symbol;Acc:61813]	52.0288	52.2376	40.6289	19.4586	27.1585	22.9462	2.08293	1.05861	up
GO:0008198	ferrous iron binding	molecular_function	9	0.05248	ENSRNOG00000033776	LOC100359668	ferritin light chain 2 [Source:RGD Symbol;Acc:2325062]	18.2062	15.2948	13.275	6.91254	7.86972	8.32579	2.02423	1.01737	up
GO:0042995	cell projection	cellular_component	4	0.0542616	ENSRNOG00000006639	Scn9a	sodium voltage-gated channel alpha subunit 9 [Source:RGD Symbol;Acc:69368]	0.00415055	0.00708024	0.083853	0	0	0	316.946	8.30809	up
GO:0042995	cell projection	cellular_component	4	0.0542616	ENSRNOG00000009951	Aif1l	allograft inflammatory factor 1-like [Source:RGD Symbol;Acc:1305081]	1.94247	4.30351	3.17287	1.2613	0.881366	0.925637	3.06973	1.61811	up
GO:0042995	cell projection	cellular_component	4	0.0542616	ENSRNOG00000014170	Dbn1	drebrin 1 [Source:RGD Symbol;Acc:70885]	10.9214	12.9572	10.2577	6.1132	4.51819	6.14413	2.03489	1.02495	up
GO:0042995	cell projection	cellular_component	4	0.0542616	ENSRNOG00000015410	Aspnl1	asporin-like 1 [Source:RGD Symbol;Acc:9278606]	5.47451	7.94654	9.04123	1.47136	1.33332	2.2312	4.46045	2.15719	up
GO:0042995	cell projection	cellular_component	4	0.0542616	ENSRNOG00000019587	Ptprn	protein tyrosine phosphatase, receptor type, N [Source:RGD Symbol;Acc:620777]	0.404913	0.311202	1.36381	0.178802	0.024688	0.090892	7.0654	2.82077	up
GO:0042995	cell projection	cellular_component	4	0.0542616	ENSRNOG00000022533	Micall2	MICAL-like 2 [Source:RGD Symbol;Acc:1307875]	2.02891	2.05633	4.06871	1.46972	0.930644	1.29824	2.2046	1.14052	up
GO:0042995	cell projection	cellular_component	4	0.0542616	ENSRNOG00000026704	Drp2	dystrophin related protein 2 [Source:RGD Symbol;Acc:621750]	4.13756	3.47252	6.62276	2.85545	2.30663	1.48257	2.142	1.09896	up
GO:0042995	cell projection	cellular_component	4	0.0542616	ENSRNOG00000031536	Syndig1	synapse differentiation inducing 1 [Source:RGD Symbol;Acc:1310753]	3.11116	2.77016	1.96867	5.58928	6.40608	5.16542	0.457438	-1.12835	down
GO:0042995	cell projection	cellular_component	4	0.0542616	ENSRNOG00000043451	Spp1	secreted phosphoprotein 1 [Source:RGD Symbol;Acc:3752]	5.06055	8.53045	47.2968	2.53233	1.09522	0.50064	14.7493	3.88257	up
GO:0042995	cell projection	cellular_component	4	0.0542616	ENSRNOG00000050431	Aspn	asporin [Source:RGD Symbol;Acc:1549776]	4.35686	7.07341	9.51473	1.40718	1.43709	1.43879	4.8902	2.28989	up
GO:0006914	autophagy	biological_process	6	0.0544515	ENSRNOG00000011483	S100a9	S100 calcium binding protein A9 [Source:RGD Symbol;Acc:620267]	20.221	25.7548	22.6237	43.4388	35.8205	91.6187	0.401453	-1.3167	down
GO:0006914	autophagy	biological_process	6	0.0544515	ENSRNOG00000011557	S100a8	S100 calcium binding protein A8 [Source:RGD Symbol;Acc:620265]	6.86219	14.8878	7.83776	25.2298	19.4616	46.9158	0.322986	-1.63046	down
GO:0006914	autophagy	biological_process	6	0.0544515	ENSRNOG00000012988	Lix1	limb and CNS expressed 1 [Source:RGD Symbol;Acc:1309454]	0.033384	0.016847	0.223884	0	0	0	913.717	9.8356	up
GO:0006914	autophagy	biological_process	6	0.0544515	ENSRNOG00000023449	Atg9b	autophagy related 9B [Source:RGD Symbol;Acc:1560887]	0.062881	0.105623	0.519309	0	0	0.006305	109.09	6.76938	up
GO:0000775	chromosome, centromeric region	cellular_component	7	0.054723	ENSRNOG00000009334	Knstrn	kinetochore-localized astrin/SPAG5 binding protein [Source:RGD Symbol;Acc:1303240]	2.00772	2.65504	3.12539	0.916384	0.953023	0.774118	2.94612	1.55882	up
GO:0000775	chromosome, centromeric region	cellular_component	7	0.054723	ENSRNOG00000009339	Cenpe	centromere protein E [Source:RGD Symbol;Acc:1307115]	0.788656	1.3332	1.09251	0.574257	0.391805	0.597516	2.05577	1.03968	up
GO:0000775	chromosome, centromeric region	cellular_component	7	0.054723	ENSRNOG00000019100	Kif2c	kinesin family member 2C [Source:RGD Symbol;Acc:620239]	1.12797	1.74616	2.14007	0.711131	0.585884	0.897951	2.28441	1.19182	up
GO:0051216	cartilage development	biological_process	6	0.054723	ENSRNOG00000004610	Lum	lumican [Source:RGD Symbol;Acc:620984]	6.91226	8.37983	35.9543	5.95545	5.12494	5.60998	3.07042	1.61843	up
GO:0051216	cartilage development	biological_process	6	0.054723	ENSRNOG00000023148	Col11a1	collagen type XI alpha 1 chain [Source:RGD Symbol;Acc:2372]	0.411087	0.52551	0.885577	0.224042	0.278554	0.247892	2.42799	1.27976	up
GO:0051216	cartilage development	biological_process	6	0.054723	ENSRNOG00000023683	Nog	noggin [Source:RGD Symbol;Acc:3183]	1.3224	2.21724	1.19676	0.464518	0.534484	0.368221	3.46425	1.79254	up
GO:0004888	transmembrane signaling receptor activity	molecular_function	5	0.0561046	ENSRNOG00000003298	Cd247	Cd247 molecule [Source:RGD Symbol;Acc:2305]	3.42781	2.27339	3.39083	5.96858	4.58895	7.66207	0.499025	-1.00282	down
GO:0004888	transmembrane signaling receptor activity	molecular_function	5	0.0561046	ENSRNOG00000022067	Tlr5	toll-like receptor 5 [Source:RGD Symbol;Acc:631351]	3.79088	2.48157	3.94515	1.49858	1.60221	1.77419	2.09592	1.06759	up
GO:0004888	transmembrane signaling receptor activity	molecular_function	5	0.0561046	ENSRNOG00000036711	Spn	sialophorin [Source:RGD Symbol;Acc:3750]	6.88598	6.45845	6.84351	11.3828	12.0279	22.4867	0.439849	-1.18492	down
GO:0004888	transmembrane signaling receptor activity	molecular_function	5	0.0561046	ENSRNOG00000057335	Clec1b	C-type lectin domain family 1, member B [Source:RGD Symbol;Acc:1563517]	1.21217	2.20758	0.914233	3.16015	4.82792	4.73455	0.340652	-1.55363	down
GO:0004888	transmembrane signaling receptor activity	molecular_function	5	0.0561046	ENSRNOG00000058714	Klre1	killer cell lectin-like receptor, family E, member 1 [Source:RGD Symbol;Acc:727903]	1.41711	1.79425	1.54913	5.00401	2.61277	6.33873	0.341119	-1.55165	down
GO:2001234	negative regulation of apoptotic signaling pathway	biological_process	9	0.0563116	ENSRNOG00000021390	Meis3	Meis homeobox 3 [Source:RGD Symbol;Acc:1308532]	7.79903	6.94742	13.9423	3.93972	2.84711	3.19807	2.87322	1.52267	up
GO:2001234	negative regulation of apoptotic signaling pathway	biological_process	9	0.0563116	ENSRNOG00000023683	Nog	noggin [Source:RGD Symbol;Acc:3183]	1.3224	2.21724	1.19676	0.464518	0.534484	0.368221	3.46425	1.79254	up
GO:0060135	maternal process involved in female pregnancy	biological_process	5	0.0563116	ENSRNOG00000007002	Lif	LIF, interleukin 6 family cytokine [Source:RGD Symbol;Acc:620865]	0.880568	1.01865	1.04408	0.472627	0.322036	0.294568	2.70218	1.43413	up
GO:0060135	maternal process involved in female pregnancy	biological_process	5	0.0563116	ENSRNOG00000013304	Arg1	arginase 1 [Source:RGD Symbol;Acc:2150]	8.35733	12.4054	14.4375	5.09255	6.15658	5.0671	2.15737	1.10928	up
GO:2000463	positive regulation of excitatory postsynaptic potential	biological_process	9	0.0563116	ENSRNOG00000014006	Neto1	neuropilin and tolloid like 1 [Source:RGD Symbol;Acc:1566269]	0.083617	0.086844	0.08791	0	0	0	861.237	9.75027	up
GO:2000463	positive regulation of excitatory postsynaptic potential	biological_process	9	0.0563116	ENSRNOG00000014170	Dbn1	drebrin 1 [Source:RGD Symbol;Acc:70885]	10.9214	12.9572	10.2577	6.1132	4.51819	6.14413	2.03489	1.02495	up
GO:0001958	endochondral ossification	biological_process	6	0.0563116	ENSRNOG00000003897	Col1a1	collagen type I alpha 1 chain [Source:RGD Symbol;Acc:61817]	126.27	249.911	273.591	58.1167	63.4283	51.677	3.75109	1.90731	up
GO:0001958	endochondral ossification	biological_process	6	0.0563116	ENSRNOG00000010905	Dlx5	distal-less homeobox 5 [Source:RGD Symbol;Acc:2506]	0.333893	0.067122	0.257194	0	0	0	2194.03	11.0994	up
GO:0005921	gap junction	cellular_component	5	0.0563116	ENSRNOG00000008847	Gja3	gap junction protein, alpha 3 [Source:RGD Symbol;Acc:621820]	0.349941	1.33511	0.943374	0.245536	0.233594	0.190604	3.92459	1.97254	up
GO:0005921	gap junction	cellular_component	5	0.0563116	ENSRNOG00000014170	Dbn1	drebrin 1 [Source:RGD Symbol;Acc:70885]	10.9214	12.9572	10.2577	6.1132	4.51819	6.14413	2.03489	1.02495	up
GO:0005901	caveola	cellular_component	8	0.0570471	ENSRNOG00000002978	Faslg	Fas ligand [Source:RGD Symbol;Acc:3880]	0.709471	0.473535	1.27202	2.10948	1.83509	3.11962	0.347531	-1.52479	down
GO:0005901	caveola	cellular_component	8	0.0570471	ENSRNOG00000014117	Hmox1	heme oxygenase 1 [Source:RGD Symbol;Acc:2806]	31.9406	70.2869	56.3487	14.3785	22.3463	16.8387	2.96053	1.56586	up
GO:0005901	caveola	cellular_component	8	0.0570471	ENSRNOG00000032871	Mlc1	modulator of VRAC current 1 [Source:RGD Symbol;Acc:1308552]	2.77574	1.49853	1.20774	4.12707	7.92023	3.89051	0.343963	-1.53968	down
GO:0030175	filopodium	cellular_component	7	0.0570471	ENSRNOG00000014170	Dbn1	drebrin 1 [Source:RGD Symbol;Acc:70885]	10.9214	12.9572	10.2577	6.1132	4.51819	6.14413	2.03489	1.02495	up
GO:0030175	filopodium	cellular_component	7	0.0570471	ENSRNOG00000015408	Vil1	villin 1 [Source:RGD Symbol;Acc:1307048]	0.852	0.23051	0.408527	1.89595	1.63924	3.09661	0.224832	-2.15308	down
GO:0030175	filopodium	cellular_component	7	0.0570471	ENSRNOG00000017786	Acta1	actin, alpha 1, skeletal muscle [Source:RGD Symbol;Acc:2025]	2.06127	3.95623	4.72239	0.202559	1.39766	0.697384	4.67439	2.22478	up
GO:0007155	cell adhesion	biological_process	4	0.0571259	ENSRNOG00000008816	Gpnmb	glycoprotein nmb [Source:RGD Symbol;Acc:71008]	193.456	246.629	303.418	84.0387	88.9556	65.1415	3.12218	1.64255	up
GO:0007155	cell adhesion	biological_process	4	0.0571259	ENSRNOG00000010529	Thbs2	thrombospondin 2 [Source:RGD Symbol;Acc:1310979]	2.57939	6.01878	6.82916	1.12399	1.12034	1.18604	4.49727	2.16905	up
GO:0007155	cell adhesion	biological_process	4	0.0571259	ENSRNOG00000013481	Cdh11	cadherin 11 [Source:RGD Symbol;Acc:619742]	13.9402	23.495	20.613	7.8593	11.181	7.5212	2.18543	1.12791	up
GO:0007155	cell adhesion	biological_process	4	0.0571259	ENSRNOG00000016632	Dsg3	desmoglein 3 [Source:RGD Symbol;Acc:1592103]	0.730607	1.46764	1.2487	0.486876	0.583329	0.606895	2.0553	1.03935	up
GO:0007155	cell adhesion	biological_process	4	0.0571259	ENSRNOG00000029212	Vcan	versican [Source:RGD Symbol;Acc:619940]	2.24955	4.3322	4.42122	1.48965	1.11479	1.8692	2.45951	1.29837	up
GO:0007155	cell adhesion	biological_process	4	0.0571259	ENSRNOG00000030515	Nfasc	neurofascin [Source:RGD Symbol;Acc:620911]	0.0215103	0.0189856	0.293672	0.00693821	0.00924876	0	20.6443	4.36767	up
GO:0007155	cell adhesion	biological_process	4	0.0571259	ENSRNOG00000033837	Cdh9	cadherin 9 [Source:RGD Symbol;Acc:1308343]	0	0	0	0.210953	0.147315	0.112743	0.000636928	-10.6166	down
GO:0007155	cell adhesion	biological_process	4	0.0571259	ENSRNOG00000039197	LOC108348074	collagen alpha-1(XV) chain-like [Source:RGD Symbol;Acc:11464459]	27.4934	28.1683	11.323	10.5648	7.14882	12.7016	2.20234	1.13904	up
GO:0007155	cell adhesion	biological_process	4	0.0571259	ENSRNOG00000043451	Spp1	secreted phosphoprotein 1 [Source:RGD Symbol;Acc:3752]	5.06055	8.53045	47.2968	2.53233	1.09522	0.50064	14.7493	3.88257	up
GO:0032400	melanosome localization	biological_process	8	0.0579726	ENSRNOG00000015774	Mreg	melanoregulin [Source:RGD Symbol;Acc:1562333]	0.740493	1.5783	3.06853	0.453484	0.431069	0.6671	3.472	1.79577	up
GO:0071633	dihydroceramidase activity	molecular_function	7	0.0579726	ENSRNOG00000007637	Acer2	alkaline ceramidase 2 [Source:RGD Symbol;Acc:1304629]	130.856	81.491	59.5416	196.926	173.911	212.56	0.466044	-1.10146	down
GO:0044194	cytolytic granule	cellular_component	9	0.0579726	ENSRNOG00000000562	Prf1	perforin 1 [Source:RGD Symbol;Acc:708463]	11.7317	8.28855	6.91728	21.9426	12.0857	30.3654	0.418325	-1.2573	down
GO:0034186	apolipoprotein A-I binding	molecular_function	6	0.0579726	ENSRNOG00000013578	Trem2	triggering receptor expressed on myeloid cells 2 [Source:RGD Symbol;Acc:1309841]	7.38714	14.2293	26.9458	3.19457	3.44342	4.12088	4.51369	2.17431	up
GO:0098735	positive regulation of the force of heart contraction	biological_process	10	0.0579726	ENSRNOG00000017060	Ryr2	ryanodine receptor 2 [Source:RGD Symbol;Acc:620314]	0.285075	0.300051	1.47817	0.173643	0.049516	0.188027	5.01792	2.32709	up
GO:0002891	positive regulation of immunoglobulin mediated immune response	biological_process	11	0.0579726	ENSRNOG00000038197	Cd226	CD226 molecule [Source:RGD Symbol;Acc:1311513]	0.859597	0.545065	0.951736	1.53046	1.35368	1.85631	0.497084	-1.00844	down
GO:0044308	axonal spine	cellular_component	6	0.0579726	ENSRNOG00000014170	Dbn1	drebrin 1 [Source:RGD Symbol;Acc:70885]	10.9214	12.9572	10.2577	6.1132	4.51819	6.14413	2.03489	1.02495	up
GO:0061891	calcium ion sensor activity	molecular_function	8	0.0579726	ENSRNOG00000006426	Syt1	synaptotagmin 1 [Source:RGD Symbol;Acc:3803]	0.535581	0.254328	0.726439	1.20032	1.83951	1.33849	0.346332	-1.52977	down
GO:0072050	S-shaped body morphogenesis	biological_process	5	0.0579726	ENSRNOG00000026203	Pax8	paired box 8 [Source:RGD Symbol;Acc:620434]	0.679274	0.646556	1.36295	0.21796	0.383172	0.130189	3.6766	1.87837	up
GO:0048318	axial mesoderm development	biological_process	7	0.0579726	ENSRNOG00000023683	Nog	noggin [Source:RGD Symbol;Acc:3183]	1.3224	2.21724	1.19676	0.464518	0.534484	0.368221	3.46425	1.79254	up
GO:1904036	negative regulation of epithelial cell apoptotic process	biological_process	10	0.0579726	ENSRNOG00000014117	Hmox1	heme oxygenase 1 [Source:RGD Symbol;Acc:2806]	31.9406	70.2869	56.3487	14.3785	22.3463	16.8387	2.96053	1.56586	up
GO:0050501	hyaluronan synthase activity	molecular_function	7	0.0579726	ENSRNOG00000059362	Has3	hyaluronan synthase 3 [Source:RGD Symbol;Acc:628656]	0.551376	0.941067	0.708262	0.367742	0.312288	0.140207	2.68301	1.42385	up
GO:0046546	development of primary male sexual characteristics	biological_process	6	0.0579726	ENSRNOG00000017783	Sfrp1	secreted frizzled-related protein 1 [Source:RGD Symbol;Acc:621074]	1.68002	2.38548	4.44256	1.64961	1.21244	0.920778	2.24913	1.16937	up
GO:0035989	tendon development	biological_process	7	0.0579726	ENSRNOG00000023148	Col11a1	collagen type XI alpha 1 chain [Source:RGD Symbol;Acc:2372]	0.411087	0.52551	0.885577	0.224042	0.278554	0.247892	2.42799	1.27976	up
GO:0007621	negative regulation of female receptivity	biological_process	8	0.0579726	ENSRNOG00000028404	Ppp1r1b	protein phosphatase 1, regulatory (inhibitor) subunit 1B [Source:RGD Symbol;Acc:621859]	22.4231	7.67647	15.2862	32.2533	35.5582	36.4644	0.435248	-1.20009	down
GO:0072289	metanephric nephron tubule formation	biological_process	9	0.0579726	ENSRNOG00000026203	Pax8	paired box 8 [Source:RGD Symbol;Acc:620434]	0.679274	0.646556	1.36295	0.21796	0.383172	0.130189	3.6766	1.87837	up
GO:0021957	corticospinal tract morphogenesis	biological_process	12	0.0579726	ENSRNOG00000013481	Cdh11	cadherin 11 [Source:RGD Symbol;Acc:619742]	13.9402	23.495	20.613	7.8593	11.181	7.5212	2.18543	1.12791	up
GO:0021889	olfactory bulb interneuron differentiation	biological_process	9	0.0579726	ENSRNOG00000010905	Dlx5	distal-less homeobox 5 [Source:RGD Symbol;Acc:2506]	0.333893	0.067122	0.257194	0	0	0	2194.03	11.0994	up
GO:0034201	response to oleic acid	biological_process	7	0.0579726	ENSRNOG00000013704	Cps1	carbamoyl-phosphate synthase 1 [Source:RGD Symbol;Acc:2395]	0.0296366	0.0318274	0.0321218	0	0	0	311.953	8.28518	up
GO:0072221	metanephric distal convoluted tubule development	biological_process	9	0.0579726	ENSRNOG00000026203	Pax8	paired box 8 [Source:RGD Symbol;Acc:620434]	0.679274	0.646556	1.36295	0.21796	0.383172	0.130189	3.6766	1.87837	up
GO:0048763	calcium-induced calcium release activity	molecular_function	10	0.0579726	ENSRNOG00000017060	Ryr2	ryanodine receptor 2 [Source:RGD Symbol;Acc:620314]	0.285075	0.300051	1.47817	0.173643	0.049516	0.188027	5.01792	2.32709	up
GO:0042481	regulation of odontogenesis	biological_process	8	0.0579726	ENSRNOG00000008826	Pax9	paired box 9 [Source:RGD Symbol;Acc:1560838]	0	0	1.38816	0	0	0	4627.2	12.1759	up
GO:0010046	response to mycotoxin	biological_process	6	0.0579726	ENSRNOG00000013973	Lcn2	lipocalin 2 [Source:RGD Symbol;Acc:69408]	399.193	738.611	424.407	107.199	115.007	143.758	4.26876	2.09382	up
GO:0043367	CD4-positive, alpha-beta T cell differentiation	biological_process	10	0.0579726	ENSRNOG00000007539	Rsad2	radical S-adenosyl methionine domain containing 2 [Source:RGD Symbol;Acc:620495]	4.92785	5.735	5.77652	12.456	7.58066	14.5645	0.475111	-1.07366	down
GO:0000003	reproduction	biological_process	3	0.0579726	ENSRNOG00000017477	Mmp23	matrix metallopeptidase 23 [Source:RGD Symbol;Acc:620201]	7.15585	8.3661	9.35647	2.48982	2.59284	4.01865	2.7335	1.45075	up
GO:0003257	positive regulation of transcription from RNA polymerase II promoter involved in myocardial precursor cell differentiation	biological_process	12	0.0579726	ENSRNOG00000026053	Grem1	gremlin 1, DAN family BMP antagonist [Source:RGD Symbol;Acc:2359]	0.95987	2.57523	2.25854	0.284014	0.14634	0.159551	9.82132	3.29592	up
GO:0060512	prostate gland morphogenesis	biological_process	5	0.0579726	ENSRNOG00000002640	Serpinb5	serpin family B member 5 [Source:RGD Symbol;Acc:69342]	0	0	0.922211	0	0	0	3074.04	11.5859	up
GO:0061041	regulation of wound healing	biological_process	8	0.0579726	ENSRNOG00000015408	Vil1	villin 1 [Source:RGD Symbol;Acc:1307048]	0.852	0.23051	0.408527	1.89595	1.63924	3.09661	0.224832	-2.15308	down
GO:1900020	positive regulation of protein kinase C activity	biological_process	13	0.0579726	ENSRNOG00000012442	Cemip	cell migration inducing hyaluronidase [Source:RGD Symbol;Acc:1305254]	4.17147	5.86685	2.59443	1.03326	1.02633	1.30613	3.75336	1.90818	up
GO:0090175	regulation of establishment of planar polarity	biological_process	8	0.0579726	ENSRNOG00000017783	Sfrp1	secreted frizzled-related protein 1 [Source:RGD Symbol;Acc:621074]	1.68002	2.38548	4.44256	1.64961	1.21244	0.920778	2.24913	1.16937	up
GO:0014839	myoblast migration involved in skeletal muscle regeneration	biological_process	9	0.0579726	ENSRNOG00000021294	Mstn	myostatin [Source:RGD Symbol;Acc:3115]	0.059124	1.35602	0.037337	0	0	0	4841.6	12.2413	up
GO:0003056	regulation of vascular smooth muscle contraction	biological_process	10	0.0579726	ENSRNOG00000017606	P2rx1	purinergic receptor P2X 1 [Source:RGD Symbol;Acc:3240]	7.18568	9.04786	9.01957	19.2409	13.9678	19.8251	0.476169	-1.07045	down
GO:0043503	skeletal muscle fiber adaptation	biological_process	5	0.0579726	ENSRNOG00000017786	Acta1	actin, alpha 1, skeletal muscle [Source:RGD Symbol;Acc:2025]	2.06127	3.95623	4.72239	0.202559	1.39766	0.697384	4.67439	2.22478	up
GO:1902305	regulation of sodium ion transmembrane transport	biological_process	10	0.0579726	ENSRNOG00000013859	Bpifa1	BPI fold containing family A, member 1 [Source:RGD Symbol;Acc:619818]	0.423531	0.205181	928.063	0.160324	0.123339	0.870753	804.469	9.65189	up
GO:0042168	heme metabolic process	biological_process	8	0.0579726	ENSRNOG00000014117	Hmox1	heme oxygenase 1 [Source:RGD Symbol;Acc:2806]	31.9406	70.2869	56.3487	14.3785	22.3463	16.8387	2.96053	1.56586	up
GO:0050869	negative regulation of B cell activation	biological_process	9	0.0579726	ENSRNOG00000032247	Bank1	B-cell scaffold protein with ankyrin repeats 1 [Source:RGD Symbol;Acc:1564639]	5.5174	3.95656	3.67413	8.59685	9.43	8.91938	0.487938	-1.03523	down
GO:0072207	metanephric epithelium development	biological_process	8	0.0579726	ENSRNOG00000026203	Pax8	paired box 8 [Source:RGD Symbol;Acc:620434]	0.679274	0.646556	1.36295	0.21796	0.383172	0.130189	3.6766	1.87837	up
GO:0006525	arginine metabolic process	biological_process	11	0.0579726	ENSRNOG00000013304	Arg1	arginase 1 [Source:RGD Symbol;Acc:2150]	8.35733	12.4054	14.4375	5.09255	6.15658	5.0671	2.15737	1.10928	up
GO:0004791	thioredoxin-disulfide reductase activity	molecular_function	7	0.0579726	ENSRNOG00000059810	Txnrd3	thioredoxin reductase 3 [Source:RGD Symbol;Acc:1308363]	7.41397	9.68591	10.2151	4.19814	4.65935	4.21054	2.09021	1.06365	up
GO:0048861	leukemia inhibitory factor signaling pathway	biological_process	7	0.0579726	ENSRNOG00000007002	Lif	LIF, interleukin 6 family cytokine [Source:RGD Symbol;Acc:620865]	0.880568	1.01865	1.04408	0.472627	0.322036	0.294568	2.70218	1.43413	up
GO:0070741	response to interleukin-6	biological_process	7	0.0579726	ENSRNOG00000053272	Chi3l1	chitinase 3 like 1 [Source:RGD Symbol;Acc:620874]	78.1203	93.0092	101.602	41.6996	35.3419	56.541	2.04167	1.02975	up
GO:0090131	mesenchyme migration	biological_process	5	0.0579726	ENSRNOG00000017786	Acta1	actin, alpha 1, skeletal muscle [Source:RGD Symbol;Acc:2025]	2.06127	3.95623	4.72239	0.202559	1.39766	0.697384	4.67439	2.22478	up
GO:0023024	MHC class I protein complex binding	molecular_function	6	0.0579726	ENSRNOG00000060246	Klrd1	killer cell lectin like receptor D1 [Source:RGD Symbol;Acc:2978]	3.34348	2.3231	3.44577	7.56228	4.74204	9.73844	0.413394	-1.27441	down
GO:1903595	positive regulation of histamine secretion by mast cell	biological_process	9	0.0579726	ENSRNOG00000008176	Nppa	natriuretic peptide A [Source:RGD Symbol;Acc:3193]	0	0	4.77912	0	0	0	15930.4	13.9595	up
GO:0034165	positive regulation of toll-like receptor 9 signaling pathway	biological_process	10	0.0579726	ENSRNOG00000007539	Rsad2	radical S-adenosyl methionine domain containing 2 [Source:RGD Symbol;Acc:620495]	4.92785	5.735	5.77652	12.456	7.58066	14.5645	0.475111	-1.07366	down
GO:0005826	actomyosin contractile ring	cellular_component	5	0.0579726	ENSRNOG00000014343	Anln	anillin, actin binding protein [Source:RGD Symbol;Acc:1561367]	1.4585	2.69318	2.21254	1.12838	0.780269	1.10367	2.11273	1.07911	up
GO:1902897	regulation of postsynaptic density protein 95 clustering	biological_process	10	0.0579726	ENSRNOG00000014170	Dbn1	drebrin 1 [Source:RGD Symbol;Acc:70885]	10.9214	12.9572	10.2577	6.1132	4.51819	6.14413	2.03489	1.02495	up
GO:0031536	positive regulation of exit from mitosis	biological_process	10	0.0579726	ENSRNOG00000015131	Ube2c	ubiquitin-conjugating enzyme E2C [Source:RGD Symbol;Acc:1305382]	1.0802	2.16214	1.89892	0.453385	0.352019	0.668492	3.48821	1.80249	up
GO:0046602	regulation of mitotic centrosome separation	biological_process	9	0.0579726	ENSRNOG00000004487	Nek2	NIMA (never in mitosis gene a)-related kinase 2-like 1 [Source:RGD Symbol;Acc:1582899]	1.56838	1.81988	3.87627	0.970926	0.827985	1.08667	2.51752	1.33201	up
GO:0046923	ER retention sequence binding	molecular_function	7	0.0579726	ENSRNOG00000012442	Cemip	cell migration inducing hyaluronidase [Source:RGD Symbol;Acc:1305254]	4.17147	5.86685	2.59443	1.03326	1.02633	1.30613	3.75336	1.90818	up
GO:0016668	oxidoreductase activity, acting on a sulfur group of donors, NAD(P) as acceptor	molecular_function	6	0.0579726	ENSRNOG00000059810	Txnrd3	thioredoxin reductase 3 [Source:RGD Symbol;Acc:1308363]	7.41397	9.68591	10.2151	4.19814	4.65935	4.21054	2.09021	1.06365	up
GO:0015705	iodide transport	biological_process	9	0.0579726	ENSRNOG00000058692	Slc26a4	solute carrier family 26 member 4 [Source:RGD Symbol;Acc:3293]	4.03381	8.98354	10.6969	1.03707	0.715431	0.934049	8.82701	3.14192	up
GO:0046870	cadmium ion binding	molecular_function	8	0.0579726	ENSRNOG00000043098	Mt2A	metallothionein 2A [Source:RGD Symbol;Acc:1592345]	22.5488	25.925	34.0743	11.7397	14.0395	14.0706	2.07148	1.05066	up
GO:0032388	positive regulation of intracellular transport	biological_process	8	0.0579726	ENSRNOG00000032871	Mlc1	modulator of VRAC current 1 [Source:RGD Symbol;Acc:1308552]	2.77574	1.49853	1.20774	4.12707	7.92023	3.89051	0.343963	-1.53968	down
GO:2000503	positive regulation of natural killer cell chemotaxis	biological_process	10	0.0579726	ENSRNOG00000010906	Ccl5	C-C motif chemokine ligand 5 [Source:RGD Symbol;Acc:69069]	48.3284	41.7605	33.5398	89.039	63.5136	135.101	0.429784	-1.21832	down
GO:1903025	regulation of RNA polymerase II regulatory region sequence-specific DNA binding	biological_process	8	0.0579726	ENSRNOG00000007002	Lif	LIF, interleukin 6 family cytokine [Source:RGD Symbol;Acc:620865]	0.880568	1.01865	1.04408	0.472627	0.322036	0.294568	2.70218	1.43413	up
GO:0048505	regulation of timing of cell differentiation	biological_process	7	0.0579726	ENSRNOG00000015461	Serpine2	serpin family E member 2 [Source:RGD Symbol;Acc:3748]	21.8704	32.5856	37.2124	17.0684	13.4899	15.117	2.00695	1.00501	up
GO:0072606	interleukin-8 secretion	biological_process	12	0.0579726	ENSRNOG00000053272	Chi3l1	chitinase 3 like 1 [Source:RGD Symbol;Acc:620874]	78.1203	93.0092	101.602	41.6996	35.3419	56.541	2.04167	1.02975	up
GO:1902725	negative regulation of satellite cell differentiation	biological_process	9	0.0579726	ENSRNOG00000021294	Mstn	myostatin [Source:RGD Symbol;Acc:3115]	0.059124	1.35602	0.037337	0	0	0	4841.6	12.2413	up
GO:0015349	thyroid hormone transmembrane transporter activity	molecular_function	7	0.0579726	ENSRNOG00000031249	Slco1a2	solute carrier organic anion transporter family, member 1A2 [Source:RGD Symbol;Acc:70985]	8.01298	7.7205	7.23905	17.1036	14.73	19.8891	0.444148	-1.17089	down
GO:1901842	negative regulation of high voltage-gated calcium channel activity	biological_process	10	0.0579726	ENSRNOG00000007567	Rem1	RRAD and GEM like GTPase 1 [Source:RGD Symbol;Acc:1306560]	5.33259	7.86326	4.63279	1.96558	1.8502	2.80629	2.69231	1.42884	up
GO:0030951	establishment or maintenance of microtubule cytoskeleton polarity	biological_process	8	0.0579726	ENSRNOG00000019100	Kif2c	kinesin family member 2C [Source:RGD Symbol;Acc:620239]	1.12797	1.74616	2.14007	0.711131	0.585884	0.897951	2.28441	1.19182	up
GO:1902514	regulation of calcium ion transmembrane transport via high voltage-gated calcium channel	biological_process	11	0.0579726	ENSRNOG00000008176	Nppa	natriuretic peptide A [Source:RGD Symbol;Acc:3193]	0	0	4.77912	0	0	0	15930.4	13.9595	up
GO:0010994	free ubiquitin chain polymerization	biological_process	9	0.0579726	ENSRNOG00000015131	Ube2c	ubiquitin-conjugating enzyme E2C [Source:RGD Symbol;Acc:1305382]	1.0802	2.16214	1.89892	0.453385	0.352019	0.668492	3.48821	1.80249	up
GO:0060708	spongiotrophoblast differentiation	biological_process	6	0.0579726	ENSRNOG00000007002	Lif	LIF, interleukin 6 family cytokine [Source:RGD Symbol;Acc:620865]	0.880568	1.01865	1.04408	0.472627	0.322036	0.294568	2.70218	1.43413	up
GO:0090027	negative regulation of monocyte chemotaxis	biological_process	9	0.0579726	ENSRNOG00000026053	Grem1	gremlin 1, DAN family BMP antagonist [Source:RGD Symbol;Acc:2359]	0.95987	2.57523	2.25854	0.284014	0.14634	0.159551	9.82132	3.29592	up
GO:0006710	androgen catabolic process	biological_process	8	0.0579726	ENSRNOG00000043451	Spp1	secreted phosphoprotein 1 [Source:RGD Symbol;Acc:3752]	5.06055	8.53045	47.2968	2.53233	1.09522	0.50064	14.7493	3.88257	up
GO:0042167	heme catabolic process	biological_process	9	0.0579726	ENSRNOG00000014117	Hmox1	heme oxygenase 1 [Source:RGD Symbol;Acc:2806]	31.9406	70.2869	56.3487	14.3785	22.3463	16.8387	2.96053	1.56586	up
GO:0031749	D2 dopamine receptor binding	molecular_function	8	0.0579726	ENSRNOG00000028404	Ppp1r1b	protein phosphatase 1, regulatory (inhibitor) subunit 1B [Source:RGD Symbol;Acc:621859]	22.4231	7.67647	15.2862	32.2533	35.5582	36.4644	0.435248	-1.20009	down
GO:1902723	negative regulation of skeletal muscle satellite cell proliferation	biological_process	9	0.0579726	ENSRNOG00000021294	Mstn	myostatin [Source:RGD Symbol;Acc:3115]	0.059124	1.35602	0.037337	0	0	0	4841.6	12.2413	up
GO:0060351	cartilage development involved in endochondral bone morphogenesis	biological_process	7	0.0579726	ENSRNOG00000003897	Col1a1	collagen type I alpha 1 chain [Source:RGD Symbol;Acc:61817]	126.27	249.911	273.591	58.1167	63.4283	51.677	3.75109	1.90731	up
GO:0072320	volume-sensitive chloride channel activity	molecular_function	9	0.0579726	ENSRNOG00000024578	Ttyh2	tweety family member 2 [Source:RGD Symbol;Acc:1562969]	7.71331	7.85453	7.28898	3.37533	3.38135	3.32008	2.26827	1.18159	up
GO:0061629	RNA polymerase II-specific DNA-binding transcription factor binding	molecular_function	7	0.0579726	ENSRNOG00000018598	Ankrd1	ankyrin repeat domain 1 [Source:RGD Symbol;Acc:61989]	52.1948	92.124	57.3024	26.6198	31.8094	17.7761	2.64577	1.40369	up
GO:1901896	positive regulation of ATPase-coupled calcium transmembrane transporter activity	biological_process	9	0.0579726	ENSRNOG00000017060	Ryr2	ryanodine receptor 2 [Source:RGD Symbol;Acc:620314]	0.285075	0.300051	1.47817	0.173643	0.049516	0.188027	5.01792	2.32709	up
GO:0070842	aggresome assembly	biological_process	7	0.0579726	ENSRNOG00000000768	Ubd	ubiquitin D [Source:RGD Symbol;Acc:69418]	0.852352	1.11817	10.1361	0.399383	0.741507	0.752221	6.39509	2.67697	up
GO:0090382	phagosome maturation	biological_process	6	0.0579726	ENSRNOG00000015774	Mreg	melanoregulin [Source:RGD Symbol;Acc:1562333]	0.740493	1.5783	3.06853	0.453484	0.431069	0.6671	3.472	1.79577	up
GO:0071156	regulation of cell cycle arrest	biological_process	8	0.0579726	ENSRNOG00000016949	Slc25a33	solute carrier family 25 member 33 [Source:RGD Symbol;Acc:1583942]	16.1568	14.3339	12.404	29.8604	28.5655	33.4012	0.467124	-1.09812	down
GO:0009611	response to wounding	biological_process	5	0.0594174	ENSRNOG00000013304	Arg1	arginase 1 [Source:RGD Symbol;Acc:2150]	8.35733	12.4054	14.4375	5.09255	6.15658	5.0671	2.15737	1.10928	up
GO:0009611	response to wounding	biological_process	5	0.0594174	ENSRNOG00000015461	Serpine2	serpin family E member 2 [Source:RGD Symbol;Acc:3748]	21.8704	32.5856	37.2124	17.0684	13.4899	15.117	2.00695	1.00501	up
GO:0009611	response to wounding	biological_process	5	0.0594174	ENSRNOG00000025120	Gli1	GLI family zinc finger 1 [Source:RGD Symbol;Acc:621673]	3.07771	4.09095	3.67171	1.56395	1.68971	1.52278	2.26955	1.18241	up
GO:0050840	extracellular matrix binding	molecular_function	4	0.0602377	ENSRNOG00000001469	Eln	elastin [Source:RGD Symbol;Acc:67394]	1211.58	1294.86	280.806	159.291	311.13	177.739	4.30024	2.10442	up
GO:0050840	extracellular matrix binding	molecular_function	4	0.0602377	ENSRNOG00000043451	Spp1	secreted phosphoprotein 1 [Source:RGD Symbol;Acc:3752]	5.06055	8.53045	47.2968	2.53233	1.09522	0.50064	14.7493	3.88257	up
GO:0005834	heterotrimeric G-protein complex	cellular_component	5	0.0642547	ENSRNOG00000005268	Gnat3	G protein subunit alpha transducin 3 [Source:RGD Symbol;Acc:727817]	1.25921	0.481596	0.306878	3.70113	2.49755	4.15072	0.197855	-2.33748	down
GO:0005834	heterotrimeric G-protein complex	cellular_component	5	0.0642547	ENSRNOG00000019296	Gnat2	G protein subunit alpha transducin 2 [Source:RGD Symbol;Acc:1309514]	1.54464	1.73817	1.48	3.37445	2.70398	3.67333	0.488405	-1.03385	down
GO:0045880	positive regulation of smoothened signaling pathway	biological_process	9	0.0642547	ENSRNOG00000017783	Sfrp1	secreted frizzled-related protein 1 [Source:RGD Symbol;Acc:621074]	1.68002	2.38548	4.44256	1.64961	1.21244	0.920778	2.24913	1.16937	up
GO:0045880	positive regulation of smoothened signaling pathway	biological_process	9	0.0642547	ENSRNOG00000025120	Gli1	GLI family zinc finger 1 [Source:RGD Symbol;Acc:621673]	3.07771	4.09095	3.67171	1.56395	1.68971	1.52278	2.26955	1.18241	up
GO:0005272	sodium channel activity	molecular_function	8	0.0642547	ENSRNOG00000006639	Scn9a	sodium voltage-gated channel alpha subunit 9 [Source:RGD Symbol;Acc:69368]	0.00415055	0.00708024	0.083853	0	0	0	316.946	8.30809	up
GO:0005272	sodium channel activity	molecular_function	8	0.0642547	ENSRNOG00000020484	Trpm5	transient receptor potential cation channel, subfamily M, member 5 [Source:RGD Symbol;Acc:1310620]	7.2614	1.93473	3.55776	17.4263	11.9153	18.1559	0.268517	-1.89691	down
GO:0007043	cell-cell junction assembly	biological_process	7	0.0642547	ENSRNOG00000013481	Cdh11	cadherin 11 [Source:RGD Symbol;Acc:619742]	13.9402	23.495	20.613	7.8593	11.181	7.5212	2.18543	1.12791	up
GO:0007043	cell-cell junction assembly	biological_process	7	0.0642547	ENSRNOG00000033837	Cdh9	cadherin 9 [Source:RGD Symbol;Acc:1308343]	0	0	0	0.210953	0.147315	0.112743	0.000636928	-10.6166	down
GO:0006826	iron ion transport	biological_process	10	0.0642547	ENSRNOG00000031506	Ftl1	ferritin light chain 1 [Source:RGD Symbol;Acc:61813]	52.0288	52.2376	40.6289	19.4586	27.1585	22.9462	2.08293	1.05861	up
GO:0006826	iron ion transport	biological_process	10	0.0642547	ENSRNOG00000033776	LOC100359668	ferritin light chain 2 [Source:RGD Symbol;Acc:2325062]	18.2062	15.2948	13.275	6.91254	7.86972	8.32579	2.02423	1.01737	up
GO:0016779	nucleotidyltransferase activity	molecular_function	6	0.0642944	ENSRNOG00000001369	Oas1a	2'-5' oligoadenylate synthetase 1A [Source:RGD Symbol;Acc:621760]	10.8024	8.5894	7.75613	18.5757	13.2011	25.5218	0.473796	-1.07766	down
GO:0016779	nucleotidyltransferase activity	molecular_function	6	0.0642944	ENSRNOG00000033220	Oas1f	2 ' -5 ' oligoadenylate synthetase 1K [Source:RGD Symbol;Acc:1359279]	5.23307	3.89105	3.42366	9.0953	7.36568	11.0517	0.456073	-1.13266	down
GO:0016779	nucleotidyltransferase activity	molecular_function	6	0.0642944	ENSRNOG00000049282	Oas2	2'-5' oligoadenylate synthetase 2 [Source:RGD Symbol;Acc:1359697]	5.96024	3.32075	3.13407	12.3504	5.63243	14.1955	0.385821	-1.374	down
GO:0042742	defense response to bacterium	biological_process	8	0.0648538	ENSRNOG00000002217	Plac8	placenta associated 8 [Source:RGD Symbol;Acc:1308102]	30.4333	34.5066	48.8078	81.0165	73.7811	152.723	0.369887	-1.43484	down
GO:0042742	defense response to bacterium	biological_process	8	0.0648538	ENSRNOG00000013859	Bpifa1	BPI fold containing family A, member 1 [Source:RGD Symbol;Acc:619818]	0.423531	0.205181	928.063	0.160324	0.123339	0.870753	804.469	9.65189	up
GO:0042742	defense response to bacterium	biological_process	8	0.0648538	ENSRNOG00000013973	Lcn2	lipocalin 2 [Source:RGD Symbol;Acc:69408]	399.193	738.611	424.407	107.199	115.007	143.758	4.26876	2.09382	up
GO:0042742	defense response to bacterium	biological_process	8	0.0648538	ENSRNOG00000022067	Tlr5	toll-like receptor 5 [Source:RGD Symbol;Acc:631351]	3.79088	2.48157	3.94515	1.49858	1.60221	1.77419	2.09592	1.06759	up
GO:0042742	defense response to bacterium	biological_process	8	0.0648538	ENSRNOG00000034139	Lyc2	lysozyme C type 2 [Source:RGD Symbol;Acc:1593616]	97.5211	111.852	81.7107	260.831	343.193	266.941	0.334208	-1.58118	down
GO:0060070	canonical Wnt signaling pathway	biological_process	8	0.0668002	ENSRNOG00000007765	Frzb	frizzled-related protein [Source:RGD Symbol;Acc:1311315]	3.17213	4.68488	12.4008	2.30154	1.72858	2.68979	3.01459	1.59196	up
GO:0060070	canonical Wnt signaling pathway	biological_process	8	0.0668002	ENSRNOG00000017783	Sfrp1	secreted frizzled-related protein 1 [Source:RGD Symbol;Acc:621074]	1.68002	2.38548	4.44256	1.64961	1.21244	0.920778	2.24913	1.16937	up
GO:0060070	canonical Wnt signaling pathway	biological_process	8	0.0668002	ENSRNOG00000025120	Gli1	GLI family zinc finger 1 [Source:RGD Symbol;Acc:621673]	3.07771	4.09095	3.67171	1.56395	1.68971	1.52278	2.26955	1.18241	up
GO:0030335	positive regulation of cell migration	biological_process	8	0.0679518	ENSRNOG00000003897	Col1a1	collagen type I alpha 1 chain [Source:RGD Symbol;Acc:61817]	126.27	249.911	273.591	58.1167	63.4283	51.677	3.75109	1.90731	up
GO:0030335	positive regulation of cell migration	biological_process	8	0.0679518	ENSRNOG00000008816	Gpnmb	glycoprotein nmb [Source:RGD Symbol;Acc:71008]	193.456	246.629	303.418	84.0387	88.9556	65.1415	3.12218	1.64255	up
GO:0030335	positive regulation of cell migration	biological_process	8	0.0679518	ENSRNOG00000010906	Ccl5	C-C motif chemokine ligand 5 [Source:RGD Symbol;Acc:69069]	48.3284	41.7605	33.5398	89.039	63.5136	135.101	0.429784	-1.21832	down
GO:0030335	positive regulation of cell migration	biological_process	8	0.0679518	ENSRNOG00000012442	Cemip	cell migration inducing hyaluronidase [Source:RGD Symbol;Acc:1305254]	4.17147	5.86685	2.59443	1.03326	1.02633	1.30613	3.75336	1.90818	up
GO:0030335	positive regulation of cell migration	biological_process	8	0.0679518	ENSRNOG00000015408	Vil1	villin 1 [Source:RGD Symbol;Acc:1307048]	0.852	0.23051	0.408527	1.89595	1.63924	3.09661	0.224832	-2.15308	down
GO:0030335	positive regulation of cell migration	biological_process	8	0.0679518	ENSRNOG00000031162	Ccl24	C-C motif chemokine ligand 24 [Source:RGD Symbol;Acc:1310245]	2.95267	4.5172	2.6358	1.47836	0.899061	1.85835	2.38579	1.25447	up
GO:0033209	tumor necrosis factor-mediated signaling pathway	biological_process	7	0.0683592	ENSRNOG00000006200	St18	ST18 C2H2C-type zinc finger transcription factor [Source:RGD Symbol;Acc:708566]	0.105997	0.0468868	0.100887	0.389868	0.323476	0.228701	0.269383	-1.89227	down
GO:0033209	tumor necrosis factor-mediated signaling pathway	biological_process	7	0.0683592	ENSRNOG00000047367	Card14	caspase recruitment domain family, member 14 [Source:RGD Symbol;Acc:1591135]	5.30785	6.42986	7.41549	2.63631	2.92656	1.73583	2.6242	1.39188	up
GO:0035019	somatic stem cell population maintenance	biological_process	5	0.0683592	ENSRNOG00000017783	Sfrp1	secreted frizzled-related protein 1 [Source:RGD Symbol;Acc:621074]	1.68002	2.38548	4.44256	1.64961	1.21244	0.920778	2.24913	1.16937	up
GO:0035019	somatic stem cell population maintenance	biological_process	5	0.0683592	ENSRNOG00000023683	Nog	noggin [Source:RGD Symbol;Acc:3183]	1.3224	2.21724	1.19676	0.464518	0.534484	0.368221	3.46425	1.79254	up
GO:0007080	mitotic metaphase plate congression	biological_process	9	0.0683592	ENSRNOG00000009339	Cenpe	centromere protein E [Source:RGD Symbol;Acc:1307115]	0.788656	1.3332	1.09251	0.574257	0.391805	0.597516	2.05577	1.03968	up
GO:0007080	mitotic metaphase plate congression	biological_process	9	0.0683592	ENSRNOG00000019100	Kif2c	kinesin family member 2C [Source:RGD Symbol;Acc:620239]	1.12797	1.74616	2.14007	0.711131	0.585884	0.897951	2.28441	1.19182	up
GO:0071479	cellular response to ionizing radiation	biological_process	7	0.0683592	ENSRNOG00000004440	Fignl1	fidgetin-like 1 [Source:RGD Symbol;Acc:1307112]	1.25489	1.98283	1.32425	0.558773	0.422531	0.693617	2.72369	1.44556	up
GO:0071479	cellular response to ionizing radiation	biological_process	7	0.0683592	ENSRNOG00000024365	Ect2	epithelial cell transforming 2 [Source:RGD Symbol;Acc:1308524]	1.29219	2.68213	3.60527	1.27175	1.0084	0.842832	2.42703	1.27919	up
GO:0003777	microtubule motor activity	molecular_function	10	0.06935	ENSRNOG00000009339	Cenpe	centromere protein E [Source:RGD Symbol;Acc:1307115]	0.788656	1.3332	1.09251	0.574257	0.391805	0.597516	2.05577	1.03968	up
GO:0003777	microtubule motor activity	molecular_function	10	0.06935	ENSRNOG00000019100	Kif2c	kinesin family member 2C [Source:RGD Symbol;Acc:620239]	1.12797	1.74616	2.14007	0.711131	0.585884	0.897951	2.28441	1.19182	up
GO:0003777	microtubule motor activity	molecular_function	10	0.06935	ENSRNOG00000023993	Kif1a	kinesin family member 1A [Source:RGD Symbol;Acc:1304996]	0.166506	0.124253	0.194855	0.636146	0.353681	0.430159	0.341985	-1.54799	down
GO:0051712	positive regulation of killing of cells of other organism	biological_process	7	0.0719347	ENSRNOG00000000562	Prf1	perforin 1 [Source:RGD Symbol;Acc:708463]	11.7317	8.28855	6.91728	21.9426	12.0857	30.3654	0.418325	-1.2573	down
GO:0055077	gap junction hemi-channel activity	molecular_function	8	0.0719347	ENSRNOG00000008847	Gja3	gap junction protein, alpha 3 [Source:RGD Symbol;Acc:621820]	0.349941	1.33511	0.943374	0.245536	0.233594	0.190604	3.92459	1.97254	up
GO:0019439	aromatic compound catabolic process	biological_process	6	0.0719347	ENSRNOG00000008902	Pon1	paraoxonase 1 [Source:RGD Symbol;Acc:620062]	4.94993	3.6737	3.80655	9.75741	7.38752	8.1471	0.491466	-1.02484	down
GO:0060687	regulation of branching involved in prostate gland morphogenesis	biological_process	8	0.0719347	ENSRNOG00000017783	Sfrp1	secreted frizzled-related protein 1 [Source:RGD Symbol;Acc:621074]	1.68002	2.38548	4.44256	1.64961	1.21244	0.920778	2.24913	1.16937	up
GO:0032532	regulation of microvillus length	biological_process	10	0.0719347	ENSRNOG00000015408	Vil1	villin 1 [Source:RGD Symbol;Acc:1307048]	0.852	0.23051	0.408527	1.89595	1.63924	3.09661	0.224832	-2.15308	down
GO:0042105	alpha-beta T cell receptor complex	cellular_component	7	0.0719347	ENSRNOG00000003298	Cd247	Cd247 molecule [Source:RGD Symbol;Acc:2305]	3.42781	2.27339	3.39083	5.96858	4.58895	7.66207	0.499025	-1.00282	down
GO:0099641	anterograde axonal protein transport	biological_process	12	0.0719347	ENSRNOG00000022635	Dlg2	discs large MAGUK scaffold protein 2 [Source:RGD Symbol;Acc:619895]	0.884341	1.52643	2.40362	0.647262	0.40045	0.624041	2.87985	1.52599	up
GO:0072584	caveolin-mediated endocytosis	biological_process	8	0.0719347	ENSRNOG00000032871	Mlc1	modulator of VRAC current 1 [Source:RGD Symbol;Acc:1308552]	2.77574	1.49853	1.20774	4.12707	7.92023	3.89051	0.343963	-1.53968	down
GO:0060385	axonogenesis involved in innervation	biological_process	10	0.0719347	ENSRNOG00000003741	Nptx1	neuronal pentraxin 1 [Source:RGD Symbol;Acc:628894]	0.09837	0.157223	0.175297	0.363175	0.746714	0.328186	0.29963	-1.73875	down
GO:0048570	notochord morphogenesis	biological_process	7	0.0719347	ENSRNOG00000023683	Nog	noggin [Source:RGD Symbol;Acc:3183]	1.3224	2.21724	1.19676	0.464518	0.534484	0.368221	3.46425	1.79254	up
GO:0042490	mechanoreceptor differentiation	biological_process	7	0.0719347	ENSRNOG00000013641	Myo7a	myosin VIIA [Source:RGD Symbol;Acc:628830]	1.16161	0.900417	1.40572	0.61878	0.548688	0.42358	2.17954	1.12402	up
GO:0071813	lipoprotein particle binding	molecular_function	6	0.0719347	ENSRNOG00000013578	Trem2	triggering receptor expressed on myeloid cells 2 [Source:RGD Symbol;Acc:1309841]	7.38714	14.2293	26.9458	3.19457	3.44342	4.12088	4.51369	2.17431	up
[truncated: 2,562 more rows]
