# Supplementary material for: Analysis of the Potential Relationship between Aging and Pulmonary Fibrosis Based on Transcriptome
Source: Life (Basel). 2022 Nov 23;12(12):1961. doi: 10.3390/life12121961 (PMC9788318; doi:10.3390/life12121961)
Supplement: Supplementary file 1 [file life-12-01961-s001.zip › Table S4-o-PF vs o-Sham GO enrichment Gene of Figure 3B.xlsx]

## Sheet: Sheet1
GO_ID	GO_Term	GO_function	GO_class	pvalue	Gene_ID	Gene_name	Description	FPKM.O_PF1	FPKM.O_PF2	FPKM.O_PF3	FPKM.O_Sham1	FPKM.O_Sham2	FPKM.O_Sham3	fc	log2(fc)	regulation
GO:0005615	extracellular space	cellular_component	4	0	ENSRNOG00000000239	Ccl7	C-C motif chemokine ligand 7 [Source:RGD Symbol;Acc:1359152]	14.4232	11.1589	18.1968	0.946133	0.831492	2.17106	11.087	3.47079	up
GO:0005615	extracellular space	cellular_component	4	0	ENSRNOG00000000443	LOC103689965	complement C4-like [Source:RGD Symbol;Acc:9245878]	395.482	429.193	522.626	207.914	155.051	131.31	2.72582	1.44669	up
GO:0005615	extracellular space	cellular_component	4	0	ENSRNOG00000000463	Col11a2	collagen type XI alpha 2 chain [Source:RGD Symbol;Acc:2373]	0.500326	1.10928	0.443421	1.4898	1.50536	1.91439	0.41817	-1.25784	down
GO:0005615	extracellular space	cellular_component	4	0	ENSRNOG00000000500	Scube3	signal peptide, CUB domain and EGF like domain containing 3 [Source:RGD Symbol;Acc:1304880]	0.922497	0.680804	0.758465	0.331512	0.289027	0.272959	2.64328	1.40233	up
GO:0005615	extracellular space	cellular_component	4	0	ENSRNOG00000000597	Ccn6	cellular communication network factor 6 [Source:RGD Symbol;Acc:1564120]	0.035468	0.06511	0.023641	0.220389	0.283599	0.311317	0.152359	-2.71445	down
GO:0005615	extracellular space	cellular_component	4	0	ENSRNOG00000001092	Kl	Klotho [Source:RGD Symbol;Acc:620396]	2.60662	5.62618	3.57293	8.08057	8.68837	10.3107	0.435964	-1.19772	down
GO:0005615	extracellular space	cellular_component	4	0	ENSRNOG00000001249	Col6a1	collagen type VI alpha 1 chain [Source:RGD Symbol;Acc:1565398]	133.697	116.137	100.859	46.125	44.8447	58.8249	2.34116	1.22722	up
GO:0005615	extracellular space	cellular_component	4	0	ENSRNOG00000001254	Col6a2	collagen type VI alpha 2 chain [Source:RGD Symbol;Acc:1305585]	151.096	132.236	115.094	51.6944	53.0243	62.9982	2.37559	1.24829	up
GO:0005615	extracellular space	cellular_component	4	0	ENSRNOG00000001333	Azgp1	alpha-2-glycoprotein 1, zinc-binding [Source:RGD Symbol;Acc:2187]	2.15601	1.76906	1.75567	5.41567	4.03726	4.44303	0.408805	-1.29052	down
GO:0005615	extracellular space	cellular_component	4	0	ENSRNOG00000001414	Serpine1	serpin family E member 1 [Source:RGD Symbol;Acc:3249]	55.409	67.7847	164.683	7.58747	10.5169	14.5605	8.81302	3.13964	up
GO:0005615	extracellular space	cellular_component	4	0	ENSRNOG00000001750	Chrd	chordin [Source:RGD Symbol;Acc:620181]	2.98953	2.01903	3.44486	1.74957	1.20295	1.00158	2.13788	1.09618	up
GO:0005615	extracellular space	cellular_component	4	0	ENSRNOG00000001865	Serpind1	serpin family D member 1 [Source:RGD Symbol;Acc:619854]	0.383391	0.380855	0.640925	2.14881	1.43236	1.31009	0.287282	-1.79946	down
GO:0005615	extracellular space	cellular_component	4	0	ENSRNOG00000001955	Retnla	resistin like alpha [Source:RGD Symbol;Acc:68349]	2152.93	1463.87	944.943	360.663	261.144	344.983	4.71845	2.23831	up
GO:0005615	extracellular space	cellular_component	4	0	ENSRNOG00000002093	Tgfbr3	transforming growth factor beta receptor 3 [Source:RGD Symbol;Acc:61821]	13.1989	16.2618	13.9274	33.5314	35.2539	39.6688	0.400058	-1.32172	down
GO:0005615	extracellular space	cellular_component	4	0	ENSRNOG00000002417	Serpinb10	serpin family B member 10 [Source:RGD Symbol;Acc:628853]	3.3084	3.22071	3.53922	44.1892	26.7975	22.6285	0.10755	-3.21692	down
GO:0005615	extracellular space	cellular_component	4	0	ENSRNOG00000002418	Tgfb2	transforming growth factor, beta 2 [Source:RGD Symbol;Acc:70491]	32.2616	34.4352	34.8496	12.3645	10.9716	12.4504	2.83756	1.50465	up
GO:0005615	extracellular space	cellular_component	4	0	ENSRNOG00000002460	Serpinb2	serpin family B member 2 [Source:RGD Symbol;Acc:621823]	0.101316	0.088103	1.2141	0.067856	0	0.028711	14.5341	3.86137	up
GO:0005615	extracellular space	cellular_component	4	0	ENSRNOG00000002723	Sele	selectin E [Source:RGD Symbol;Acc:3654]	2.98187	1.19921	3.6168	0.289072	0.400788	0.3301	7.64528	2.93457	up
GO:0005615	extracellular space	cellular_component	4	0	ENSRNOG00000002754	Areg	amphiregulin [Source:RGD Symbol;Acc:2149]	15.0098	32.3225	41.5271	12.678	12.7718	5.23223	2.89613	1.53413	up
GO:0005615	extracellular space	cellular_component	4	0	ENSRNOG00000002771	Ereg	epiregulin [Source:RGD Symbol;Acc:620299]	3.53527	6.81166	10.5663	3.01735	3.00566	2.96011	2.32806	1.21913	up
GO:0005615	extracellular space	cellular_component	4	0	ENSRNOG00000002794	Selp	selectin P [Source:RGD Symbol;Acc:3656]	3.596	2.43421	6.01392	1.27506	1.4035	1.324	3.0091	1.58933	up
GO:0005615	extracellular space	cellular_component	4	0	ENSRNOG00000002831	Wfikkn2	WAP, follistatin/kazal, immunoglobulin, kunitz and netrin domain containing 2 [Source:RGD Symbol;Acc:1305361]	0.824461	0.619196	0.21568	0.223763	0.159189	0.24834	2.62848	1.39423	up
GO:0005615	extracellular space	cellular_component	4	0	ENSRNOG00000002937	Ren	renin [Source:RGD Symbol;Acc:3554]	0.210662	0.122506	0	0	0	0	1110.56	10.1171	up
GO:0005615	extracellular space	cellular_component	4	0	ENSRNOG00000002978	Faslg	Fas ligand [Source:RGD Symbol;Acc:3880]	0.816894	1.01133	0.807977	3.43662	5.79528	3.71874	0.203558	-2.29649	down
GO:0005615	extracellular space	cellular_component	4	0	ENSRNOG00000002984	Bmp15	bone morphogenetic protein 15 [Source:RGD Symbol;Acc:70990]	0.45701	0.765327	0.542995	2.39819	2.9696	2.67733	0.219429	-2.18817	down
GO:0005615	extracellular space	cellular_component	4	0	ENSRNOG00000003172	Serpinf1	serpin family F member 1 [Source:RGD Symbol;Acc:631369]	45.6714	23.7715	24.3167	5.34695	3.41355	6.33342	6.21175	2.635	up
GO:0005615	extracellular space	cellular_component	4	0	ENSRNOG00000003357	Col3a1	collagen type III alpha 1 chain [Source:RGD Symbol;Acc:71029]	773.166	628.281	469.974	156.474	148.568	159.465	4.02884	2.01036	up
GO:0005615	extracellular space	cellular_component	4	0	ENSRNOG00000003538	Adamts4	ADAM metallopeptidase with thrombospondin type 1 motif, 4 [Source:RGD Symbol;Acc:621242]	1.18108	1.04194	1.92092	0.112503	0.050944	0.065765	18.0791	4.17625	up
GO:0005615	extracellular space	cellular_component	4	0	ENSRNOG00000003732	Flrt2	fibronectin leucine rich transmembrane protein 2 [Source:RGD Symbol;Acc:1308574]	5.80223	4.99289	14.0709	1.80281	2.04289	1.39731	4.74271	2.24571	up
GO:0005615	extracellular space	cellular_component	4	0	ENSRNOG00000003736	Col5a2	collagen type V alpha 2 chain [Source:RGD Symbol;Acc:70921]	97.1307	91.8408	82.7718	37.0816	38.9407	47.369	2.20229	1.139	up
GO:0005615	extracellular space	cellular_component	4	0	ENSRNOG00000003897	Col1a1	collagen type I alpha 1 chain [Source:RGD Symbol;Acc:61817]	330.164	210.993	127.588	21.9343	20.0594	21.0288	10.6112	3.40752	up
GO:0005615	extracellular space	cellular_component	4	0	ENSRNOG00000003969	Fam20a	FAM20A, golgi associated secretory pathway pseudokinase [Source:RGD Symbol;Acc:1306364]	2.87589	2.65211	2.3832	5.94228	6.53379	6.99995	0.406202	-1.29973	down
GO:0005615	extracellular space	cellular_component	4	0	ENSRNOG00000004062	C4bpa	complement component 4 binding protein, alpha [Source:RGD Symbol;Acc:2235]	58.5906	39.8521	68.5658	25.9576	24.1979	21.7374	2.32302	1.216	up
GO:0005615	extracellular space	cellular_component	4	0	ENSRNOG00000004404	Tac4	tachykinin 4 [Source:RGD Symbol;Acc:628842]	5.30119	5.34132	4.09235	0.769295	0.661404	0.350317	8.27329	3.04846	up
GO:0005615	extracellular space	cellular_component	4	0	ENSRNOG00000004470	Il24	interleukin 24 [Source:RGD Symbol;Acc:621484]	4.71744	2.76935	8.35128	0.381472	0.213099	0.210391	19.6755	4.29833	up
GO:0005615	extracellular space	cellular_component	4	0	ENSRNOG00000004540	Clec3b	C-type lectin domain family 3, member B [Source:RGD Symbol;Acc:1311031]	120.517	107.673	87.2039	42.8811	43.4075	48.0254	2.34818	1.23154	up
GO:0005615	extracellular space	cellular_component	4	0	ENSRNOG00000004578	Cthrc1	collagen triple helix repeat containing 1 [Source:RGD Symbol;Acc:628801]	20.6941	8.67496	7.52358	1.74363	1.52406	1.42924	7.85464	2.97354	up
GO:0005615	extracellular space	cellular_component	4	0	ENSRNOG00000005347	Fjx1	four-jointed box kinase 1 [Source:RGD Symbol;Acc:1306113]	3.83601	4.67366	6.05379	1.62739	2.01987	2.07333	2.54579	1.34812	up
GO:0005615	extracellular space	cellular_component	4	0	ENSRNOG00000005650	Pgf	placental growth factor [Source:RGD Symbol;Acc:619850]	4.74821	4.86013	6.89225	1.81335	1.74628	1.74662	3.10965	1.63675	up
GO:0005615	extracellular space	cellular_component	4	0	ENSRNOG00000005944	Slurp1	secreted Ly6/Plaur domain containing 1 [Source:RGD Symbol;Acc:1308768]	5.49258	1.6078	5.19726	0.16214	0.785577	0.659463	7.65168	2.93578	up
GO:0005615	extracellular space	cellular_component	4	0	ENSRNOG00000006579	Reg3g	regenerating family member 3 gamma [Source:RGD Symbol;Acc:3256]	3.69088	0.080361	3.74511	0	0	0	25054.5	14.6128	up
GO:0005615	extracellular space	cellular_component	4	0	ENSRNOG00000006778	Mmp19	matrix metallopeptidase 19 [Source:RGD Symbol;Acc:1311376]	22.3382	18.0888	17.5573	9.9295	8.98639	7.69105	2.17929	1.12386	up
GO:0005615	extracellular space	cellular_component	4	0	ENSRNOG00000007078	Ccn4	cellular communication network factor 4 [Source:RGD Symbol;Acc:69431]	0.981429	0.637733	1.09487	0.0284343	0	0.0276873	48.3598	5.59574	up
GO:0005615	extracellular space	cellular_component	4	0	ENSRNOG00000007159	Ccl2	C-C motif chemokine ligand 2 [Source:RGD Symbol;Acc:3645]	37.7066	18.9936	41.8423	1.20024	1.4775	2.90705	17.6448	4.14117	up
GO:0005615	extracellular space	cellular_component	4	0	ENSRNOG00000007300	C1qtnf6	C1q and TNF related 6 [Source:RGD Symbol;Acc:1307057]	8.43384	5.89115	3.80482	1.8543	2.50617	1.85512	2.91683	1.5444	up
GO:0005615	extracellular space	cellular_component	4	0	ENSRNOG00000007302	Fbn1	fibrillin 1 [Source:RGD Symbol;Acc:620908]	30.0541	29.7677	24.9997	8.20277	8.09057	8.42094	3.43208	1.77909	up
GO:0005615	extracellular space	cellular_component	4	0	ENSRNOG00000007335	Ccl11	C-C motif chemokine ligand 11 [Source:RGD Symbol;Acc:3644]	3.34409	1.3286	2.39904	6.15745	3.9376	18.2383	0.249591	-2.00236	down
GO:0005615	extracellular space	cellular_component	4	0	ENSRNOG00000007374	Tac1	tachykinin, precursor 1 [Source:RGD Symbol;Acc:3807]	0.715164	0.85091	1.28238	3.61698	2.4429	1.33902	0.384984	-1.37713	down
GO:0005615	extracellular space	cellular_component	4	0	ENSRNOG00000007468	Ifng	interferon gamma [Source:RGD Symbol;Acc:2866]	0	0	0	0.111509	0.315579	0.259981	0.000436637	-11.1613	down
GO:0005615	extracellular space	cellular_component	4	0	ENSRNOG00000007613	C1qtnf5	C1q and TNF related 5 [Source:RGD Symbol;Acc:1308802]	34.5553	31.8051	33.5564	10.6425	9.59122	10.8528	3.21415	1.68444	up
GO:0005615	extracellular space	cellular_component	4	0	ENSRNOG00000007765	Frzb	frizzled-related protein [Source:RGD Symbol;Acc:1311315]	7.73265	4.87263	8.7504	0.835247	1.32762	1.13202	6.48146	2.69632	up
GO:0005615	extracellular space	cellular_component	4	0	ENSRNOG00000007810	Gdf6	growth differentiation factor 6 [Source:RGD Symbol;Acc:620104]	0.222642	0.323762	0.898277	0.028828	0.075581	0.015319	12.0664	3.59292	up
GO:0005615	extracellular space	cellular_component	4	0	ENSRNOG00000008246	Emilin1	elastin microfibril interfacer 1 [Source:RGD Symbol;Acc:1311209]	33.8479	31.5242	28.4099	12.5544	13.2388	13.7678	2.37056	1.24523	up
GO:0005615	extracellular space	cellular_component	4	0	ENSRNOG00000008310	Mpo	myeloperoxidase [Source:RGD Symbol;Acc:1592081]	0.0178849	0	0.0336242	0.108739	0.193909	0.202207	0.102027	-3.29297	down
GO:0005615	extracellular space	cellular_component	4	0	ENSRNOG00000008336	Tnfrsf11b	TNF receptor superfamily member 11B [Source:RGD Symbol;Acc:619802]	15.8317	17.9665	17.8888	5.69922	5.57279	7.20068	2.79802	1.48441	up
GO:0005615	extracellular space	cellular_component	4	0	ENSRNOG00000008591	Colec10	collectin subfamily member 10 [Source:RGD Symbol;Acc:1307149]	0.208513	0.315592	0.391624	0.065495	0.078789	0.079641	4.08945	2.03191	up
GO:0005615	extracellular space	cellular_component	4	0	ENSRNOG00000008680	Loxl1	lysyl oxidase-like 1 [Source:RGD Symbol;Acc:1308752]	63.4442	58.285	47.428	14.3395	11.9453	14.514	4.14613	2.05176	up
GO:0005615	extracellular space	cellular_component	4	0	ENSRNOG00000009646	Nyx	nyctalopin [Source:RGD Symbol;Acc:1561300]	0	0	0.018017	0.284353	0.192044	0.287543	0.0235843	-5.40603	down
GO:0005615	extracellular space	cellular_component	4	0	ENSRNOG00000009768	LOC100912228	pro-neuropeptide Y-like [Source:RGD Symbol;Acc:6487865]	5.52974	7.0638	11.5309	19.3687	12.1043	22.9197	0.443523	-1.17292	down
GO:0005615	extracellular space	cellular_component	4	0	ENSRNOG00000009826	Bche	butyrylcholinesterase [Source:RGD Symbol;Acc:619996]	1.67234	2.48759	1.42024	0.934799	0.946993	0.794252	2.08523	1.06021	up
GO:0005615	extracellular space	cellular_component	4	0	ENSRNOG00000009867	Tgfb3	transforming growth factor, beta 3 [Source:RGD Symbol;Acc:3851]	28.04	20.6768	22.6266	8.0599	7.08636	6.45932	3.30208	1.72338	up
GO:0005615	extracellular space	cellular_component	4	0	ENSRNOG00000009884	Lgals1	galectin 1 [Source:RGD Symbol;Acc:69355]	435.47	271.097	396.875	222.629	158.549	127.526	2.16912	1.11711	up
GO:0005615	extracellular space	cellular_component	4	0	ENSRNOG00000009907	Mmp8	matrix metallopeptidase 8 [Source:RGD Symbol;Acc:631408]	2.00547	1.65031	0.763331	3.84607	1.99292	4.16718	0.44164	-1.17906	down
GO:0005615	extracellular space	cellular_component	4	0	ENSRNOG00000010208	Timp1	TIMP metallopeptidase inhibitor 1 [Source:RGD Symbol;Acc:621675]	191.725	124.836	377.443	39.0496	29.0957	32.338	6.90666	2.78799	up
GO:0005615	extracellular space	cellular_component	4	0	ENSRNOG00000010278	Il6	interleukin 6 [Source:RGD Symbol;Acc:2901]	3.16485	2.11915	11.0231	0.116354	0.115796	0.224046	35.7458	5.1597	up
GO:0005615	extracellular space	cellular_component	4	0	ENSRNOG00000010457	Vash1	vasohibin 1 [Source:RGD Symbol;Acc:1564082]	8.6217	7.37295	5.67165	3.02539	2.87105	2.83805	2.48055	1.31066	up
GO:0005615	extracellular space	cellular_component	4	0	ENSRNOG00000010463	Cpa4	carboxypeptidase A4 [Source:RGD Symbol;Acc:1563619]	0.819451	0.547548	0.769869	0.213237	0.344024	0.043225	3.55856	1.8313	up
GO:0005615	extracellular space	cellular_component	4	0	ENSRNOG00000010478	LOC299282	Ab1-233 [Source:RGD Symbol;Acc:1562479]	21.7553	13.164	40.8971	0.246777	1.63049	1.67598	21.3372	4.4153	up
GO:0005615	extracellular space	cellular_component	4	0	ENSRNOG00000010513	Tfpi2	tissue factor pathway inhibitor 2 [Source:RGD Symbol;Acc:628629]	2.00105	1.77887	4.74033	0.380949	0.387955	0.301121	7.96267	2.99325	up
GO:0005615	extracellular space	cellular_component	4	0	ENSRNOG00000010906	Ccl5	C-C motif chemokine ligand 5 [Source:RGD Symbol;Acc:69069]	33.6073	45.533	17.0812	161.621	269.977	147.801	0.166071	-2.59013	down
GO:0005615	extracellular space	cellular_component	4	0	ENSRNOG00000010935	Cpb2	carboxypeptidase B2 [Source:RGD Symbol;Acc:71035]	0.66711	0.499583	0.757648	0.244928	0.291876	0.095584	3.04298	1.60548	up
GO:0005615	extracellular space	cellular_component	4	0	ENSRNOG00000010947	Mmp14	matrix metallopeptidase 14 [Source:RGD Symbol;Acc:620198]	73.5681	51.0079	51.6732	22.5951	16.4562	16.8319	3.15389	1.65713	up
GO:0005615	extracellular space	cellular_component	4	0	ENSRNOG00000011130	Calca	calcitonin-related polypeptide alpha [Source:RGD Symbol;Acc:2254]	0.0864105	0.283044	0.149482	0.762545	1.17682	1.38808	0.155957	-2.68078	down
GO:0005615	extracellular space	cellular_component	4	0	ENSRNOG00000011320	Igfbpl1	insulin-like growth factor binding protein-like 1 [Source:RGD Symbol;Acc:1305656]	0.295033	0.370416	0.127175	1.33343	1.75192	1.30268	0.180633	-2.46887	down
GO:0005615	extracellular space	cellular_component	4	0	ENSRNOG00000011631	Fst	follistatin [Source:RGD Symbol;Acc:2633]	15.1182	13.6322	18.0437	3.03205	2.47665	3.75114	5.05345	2.33727	up
GO:0005615	extracellular space	cellular_component	4	0	ENSRNOG00000011706	Mbl1	mannose-binding lectin (protein A) 1 [Source:RGD Symbol;Acc:3055]	2.56921	3.06382	2.73128	0.495776	1.10101	0.920711	3.32248	1.73226	up
GO:0005615	extracellular space	cellular_component	4	0	ENSRNOG00000011796	C1r	complement C1r [Source:RGD Symbol;Acc:1309091]	123.094	95.9083	133.697	50.3805	41.8088	43.88	2.59206	1.3741	up
GO:0005615	extracellular space	cellular_component	4	0	ENSRNOG00000011800	F3	coagulation factor III, tissue factor [Source:RGD Symbol;Acc:2587]	167.292	169.907	352.923	54.9981	53.3236	44.8062	4.50683	2.17211	up
GO:0005615	extracellular space	cellular_component	4	0	ENSRNOG00000011946	Ptn	pleiotrophin [Source:RGD Symbol;Acc:3444]	7.08411	4.9815	4.90333	1.78003	1.39043	2.30363	3.09986	1.63221	up
GO:0005615	extracellular space	cellular_component	4	0	ENSRNOG00000012216	Tgfbi	transforming growth factor, beta induced [Source:RGD Symbol;Acc:620017]	41.0144	25.3631	33.6917	15.6014	15.5471	14.7259	2.18138	1.12524	up
GO:0005615	extracellular space	cellular_component	4	0	ENSRNOG00000012280	Ptx3	pentraxin 3 [Source:RGD Symbol;Acc:1593476]	8.43453	3.34676	14.9743	0.836776	0.630793	0.793102	11.8352	3.56502	up
GO:0005615	extracellular space	cellular_component	4	0	ENSRNOG00000012660	Postn	periostin [Source:RGD Symbol;Acc:1305285]	317.385	321.176	267.696	117.573	99.7376	147.058	2.4872	1.31452	up
GO:0005615	extracellular space	cellular_component	4	0	ENSRNOG00000012840	Sparc	secreted protein acidic and cysteine rich [Source:RGD Symbol;Acc:3742]	1859.4	1712.29	1518.68	726.387	694.718	834.72	2.25655	1.17412	up
GO:0005615	extracellular space	cellular_component	4	0	ENSRNOG00000013123	Scube2	signal peptide, CUB domain and EGF like domain containing 2 [Source:RGD Symbol;Acc:1563998]	0.455884	0.895264	0.540782	1.81237	2.70434	2.76748	0.259731	-1.94491	down
GO:0005615	extracellular space	cellular_component	4	0	ENSRNOG00000013304	Arg1	arginase 1 [Source:RGD Symbol;Acc:2150]	38.2968	26.0177	49.9768	14.1945	11.7175	9.74681	3.20513	1.68038	up
GO:0005615	extracellular space	cellular_component	4	0	ENSRNOG00000013736	C9	complement C9 [Source:RGD Symbol;Acc:620319]	2.32761	1.63723	1.69646	0.095381	0.17503	0.090134	15.702	3.97288	up
GO:0005615	extracellular space	cellular_component	4	0	ENSRNOG00000013973	Lcn2	lipocalin 2 [Source:RGD Symbol;Acc:69408]	1594.83	895.005	2315.86	265.381	192.039	198.689	7.32455	2.87274	up
GO:0005615	extracellular space	cellular_component	4	0	ENSRNOG00000014064	Ctsh	cathepsin H [Source:RGD Symbol;Acc:2447]	939.712	762.607	773.915	433.187	408.244	355.294	2.06918	1.04906	up
GO:0005615	extracellular space	cellular_component	4	0	ENSRNOG00000014288	Fn1	fibronectin 1 [Source:RGD Symbol;Acc:2624]	280.945	248.379	229.735	57.4707	64.5711	77.3481	3.80691	1.92862	up
GO:0005615	extracellular space	cellular_component	4	0	ENSRNOG00000014320	Inhba	inhibin subunit beta A [Source:RGD Symbol;Acc:62074]	1.43305	0.871656	0.743097	0.170937	0.044034	0.019916	12.9756	3.69773	up
GO:0005615	extracellular space	cellular_component	4	0	ENSRNOG00000014385	Wnt2b	Wnt family member 2B [Source:RGD Symbol;Acc:69346]	1.93844	1.91525	1.50408	7.62981	5.39889	3.48382	0.324467	-1.62386	down
GO:0005615	extracellular space	cellular_component	4	0	ENSRNOG00000014426	Lox	lysyl oxidase [Source:RGD Symbol;Acc:3015]	56.109	59.4426	61.512	17.4454	17.4535	21.6606	3.13057	1.64643	up
GO:0005615	extracellular space	cellular_component	4	0	ENSRNOG00000014650	Sema4g	semaphorin 4G [Source:RGD Symbol;Acc:1310436]	1.18712	2.11551	3.10514	0.518269	1.28814	0.624573	2.63588	1.39828	up
GO:0005615	extracellular space	cellular_component	4	0	ENSRNOG00000015036	Ccn2	cellular communication network factor 2 [Source:RGD Symbol;Acc:621392]	218.744	343.767	345.238	124.994	151.721	144.012	2.15757	1.10941	up
GO:0005615	extracellular space	cellular_component	4	0	ENSRNOG00000015055	Scg2	secretogranin II [Source:RGD Symbol;Acc:3626]	0.035057	0.056805	0.033008	0.176457	0.151106	0.287455	0.203035	-2.3002	down
GO:0005615	extracellular space	cellular_component	4	0	ENSRNOG00000015156	Gal	galanin and GMAP prepropeptide [Source:RGD Symbol;Acc:61954]	3.00749	6.39934	1.08286	0.483463	1.01067	0.118952	6.50286	2.70107	up
GO:0005615	extracellular space	cellular_component	4	0	ENSRNOG00000015461	Serpine2	serpin family E member 2 [Source:RGD Symbol;Acc:3748]	61.0568	43.5868	59.6911	18.6343	15.2167	14.1918	3.42059	1.77424	up
GO:0005615	extracellular space	cellular_component	4	0	ENSRNOG00000015618	Wnt5a	Wnt family member 5A [Source:RGD Symbol;Acc:69250]	7.40085	6.90616	6.99221	3.0348	2.5955	2.2052	2.7183	1.4427	up
GO:0005615	extracellular space	cellular_component	4	0	ENSRNOG00000015750	Wnt7b	Wnt family member 7B [Source:RGD Symbol;Acc:1311441]	1.76975	1.41713	2.20033	0.207026	0.670733	0.684039	3.44937	1.78633	up
GO:0005615	extracellular space	cellular_component	4	0	ENSRNOG00000015858	Hyal1	hyaluronidase 1 [Source:RGD Symbol;Acc:1303060]	13.1911	9.38187	9.33985	18.5813	21.0105	34.4394	0.431072	-1.214	down
GO:0005615	extracellular space	cellular_component	4	0	ENSRNOG00000015902	Cpxm2	carboxypeptidase X (M14 family), member 2 [Source:RGD Symbol;Acc:1310955]	31.4857	28.534	40.452	9.18218	7.93435	5.96683	4.35256	2.12186	up
GO:0005615	extracellular space	cellular_component	4	0	ENSRNOG00000015992	Ccl20	C-C motif chemokine ligand 20 [Source:RGD Symbol;Acc:3646]	3.55187	1.52624	2.52854	0.934769	1.07933	0.51172	3.01156	1.59051	up
GO:0005615	extracellular space	cellular_component	4	0	ENSRNOG00000016278	Ccl17	C-C motif chemokine ligand 17 [Source:RGD Symbol;Acc:619924]	3.89019	6.53501	5.24364	1.31455	3.29401	1.16464	2.71406	1.44045	up
GO:0005615	extracellular space	cellular_component	4	0	ENSRNOG00000016281	Col4a1	collagen type IV alpha 1 chain [Source:RGD Symbol;Acc:1307148]	228.604	293.978	253.367	78.1782	93.3833	113.433	2.72268	1.44503	up
GO:0005615	extracellular space	cellular_component	4	0	ENSRNOG00000016343	Dkk3	dickkopf WNT signaling pathway inhibitor 3 [Source:RGD Symbol;Acc:621846]	27.3947	26.2492	26.5912	10.0043	8.4514	9.72904	2.84676	1.50932	up
GO:0005615	extracellular space	cellular_component	4	0	ENSRNOG00000016535	Ccl22	C-C motif chemokine ligand 22 [Source:RGD Symbol;Acc:619933]	0.579045	2.03706	1.27757	0.082517	0.590059	0.297163	4.01517	2.00546	up
GO:0005615	extracellular space	cellular_component	4	0	ENSRNOG00000016571	Ngf	nerve growth factor [Source:RGD Symbol;Acc:1598328]	0.683532	0.348949	0.591755	0.156563	0.22621	0.0462036	3.78631	1.92079	up
GO:0005615	extracellular space	cellular_component	4	0	ENSRNOG00000016695	Mmp2	matrix metallopeptidase 2 [Source:RGD Symbol;Acc:621316]	112.629	84.3299	76.9475	30.7938	26.2646	32.2348	3.06749	1.61706	up
GO:0005615	extracellular space	cellular_component	4	0	ENSRNOG00000016696	Angpt2	angiopoietin 2 [Source:RGD Symbol;Acc:621861]	8.59042	8.08431	6.18316	3.01199	2.77709	3.05503	2.58453	1.3699	up
GO:0005615	extracellular space	cellular_component	4	0	ENSRNOG00000016758	Loxl2	lysyl oxidase-like 2 [Source:RGD Symbol;Acc:1308435]	19.6039	17.8362	15.6078	4.77017	4.27398	5.86148	3.55891	1.83144	up
GO:0005615	extracellular space	cellular_component	4	0	ENSRNOG00000016837	Ckm	creatine kinase, M-type [Source:RGD Symbol;Acc:2358]	0	0	0.031429	0.606921	0.069227	0.253695	0.0338003	-4.88682	down
GO:0005615	extracellular space	cellular_component	4	0	ENSRNOG00000016945	Pla2g2a	phospholipase A2 group IIA [Source:RGD Symbol;Acc:620857]	430.776	142.041	305.208	62.6552	8.5295	13.1795	10.4076	3.37956	up
GO:0005615	extracellular space	cellular_component	4	0	ENSRNOG00000017237	Lama1	laminin subunit alpha 1 [Source:RGD Symbol;Acc:1307207]	0.012656	0.0023	0.040977	0	0	0	186.443	7.54259	up
GO:0005615	extracellular space	cellular_component	4	0	ENSRNOG00000017477	Mmp23	matrix metallopeptidase 23 [Source:RGD Symbol;Acc:620201]	9.53142	7.20412	8.46643	1.49011	1.53306	2.22156	4.8052	2.2646	up
GO:0005615	extracellular space	cellular_component	4	0	ENSRNOG00000017539	Mmp9	matrix metallopeptidase 9 [Source:RGD Symbol;Acc:621320]	0.708985	0.326444	0.167858	0.688657	1.06294	1.59762	0.359274	-1.47684	down
GO:0005615	extracellular space	cellular_component	4	0	ENSRNOG00000017759	Ucn3	urocortin 3 [Source:RGD Symbol;Acc:1562213]	0.069837	0.271317	0.666331	0	0	0	3358.28	11.7135	up
GO:0005615	extracellular space	cellular_component	4	0	ENSRNOG00000017873	Sct	secretin [Source:RGD Symbol;Acc:3643]	2.3567	3.70786	3.37265	0.308273	0.702983	0.388027	6.74431	2.75367	up
GO:0005615	extracellular space	cellular_component	4	0	ENSRNOG00000018059	Ihh	Indian hedgehog signaling molecule [Source:RGD Symbol;Acc:620021]	0.149505	0.246864	0.042178	0.508533	0.832047	0.848627	0.200322	-2.31961	down
GO:0005615	extracellular space	cellular_component	4	0	ENSRNOG00000018257	Hpx	hemopexin [Source:RGD Symbol;Acc:62040]	4.72321	3.68476	5.32204	1.65765	1.55564	2.56035	2.37805	1.24978	up
GO:0005615	extracellular space	cellular_component	4	0	ENSRNOG00000018338	Vwa1	von Willebrand factor A domain containing 1 [Source:RGD Symbol;Acc:1311476]	11.376	7.54389	11.959	4.97604	3.71716	4.68247	2.30858	1.20701	up
GO:0005615	extracellular space	cellular_component	4	0	ENSRNOG00000018952	Sema3g	semaphorin 3G [Source:RGD Symbol;Acc:1306079]	49.0443	67.1144	39.5881	86.0028	98.1809	146.428	0.471086	-1.08594	down
GO:0005615	extracellular space	cellular_component	4	0	ENSRNOG00000018991	Gsn	gelsolin [Source:RGD Symbol;Acc:1303089]	421.812	450.543	281.254	1095.5	923.271	1115.79	0.368029	-1.44211	down
GO:0005615	extracellular space	cellular_component	4	0	ENSRNOG00000019138	Clec11a	C-type lectin domain containing 11A [Source:RGD Symbol;Acc:3627]	2.21488	1.61767	1.58088	0.299434	0.084132	0.026429	13.2036	3.72286	up
GO:0005615	extracellular space	cellular_component	4	0	ENSRNOG00000019350	Lyzl4	lysozyme-like 4 [Source:RGD Symbol;Acc:1308401]	0.544092	0.653479	0.058003	0	0	0	4185.25	12.0311	up
GO:0005615	extracellular space	cellular_component	4	0	ENSRNOG00000019445	Msln	mesothelin [Source:RGD Symbol;Acc:69333]	152.008	110.629	159.538	55.1951	30.864	26.1269	3.76317	1.91195	up
GO:0005615	extracellular space	cellular_component	4	0	ENSRNOG00000020525	Col5a3	collagen type V alpha 3 chain [Source:RGD Symbol;Acc:70922]	6.27947	4.20125	3.33351	1.45791	1.15799	1.30957	3.51913	1.81522	up
GO:0005615	extracellular space	cellular_component	4	0	ENSRNOG00000020563	Cma1	chymase 1 [Source:RGD Symbol;Acc:2365]	39.918	10.9509	5.28186	1.65773	1.49175	1.16244	13.0222	3.7029	up
GO:0005615	extracellular space	cellular_component	4	0	ENSRNOG00000020579	Col7a1	collagen type VII alpha 1 chain [Source:RGD Symbol;Acc:1311417]	6.0876	5.0077	3.26195	1.88501	2.20626	1.57632	2.53322	1.34097	up
GO:0005615	extracellular space	cellular_component	4	0	ENSRNOG00000020587	Efemp2	EGF containing fibulin extracellular matrix protein 2 [Source:RGD Symbol;Acc:1359496]	38.2272	32.29	41.6207	14.4099	14.0551	14.4292	2.61429	1.38642	up
GO:0005615	extracellular space	cellular_component	4	0	ENSRNOG00000020625	Mcpt1	mast cell protease 2 [Source:RGD Symbol;Acc:621058]	12.8352	6.74173	9.87014	0.932975	0.814616	0.769753	11.6977	3.54815	up
GO:0005615	extracellular space	cellular_component	4	0	ENSRNOG00000020733	Camp	cathelicidin antimicrobial peptide [Source:RGD Symbol;Acc:1559878]	1.35987	0.998778	1.40631	2.74325	2.92398	3.19669	0.42475	-1.23531	down
GO:0005615	extracellular space	cellular_component	4	0	ENSRNOG00000021029	Hamp	hepcidin antimicrobial peptide [Source:RGD Symbol;Acc:70971]	0.685082	0.809251	0.93874	0.114888	0	0	21.1778	4.40448	up
GO:0005615	extracellular space	cellular_component	4	0	ENSRNOG00000021155	Ctsk	cathepsin K [Source:RGD Symbol;Acc:61810]	41.0334	42.676	29.5982	11.0648	7.58504	6.87196	4.43964	2.15044	up
GO:0005615	extracellular space	cellular_component	4	0	ENSRNOG00000021220	Cpxm1	carboxypeptidase X (M14 family), member 1 [Source:RGD Symbol;Acc:1306937]	10.3279	8.38416	10.0657	4.27552	3.66281	1.69006	2.98884	1.57959	up
GO:0005615	extracellular space	cellular_component	4	0	ENSRNOG00000021276	Bmp2	bone morphogenetic protein 2 [Source:RGD Symbol;Acc:2211]	3.40519	7.43167	5.53057	2.54594	1.70193	2.53326	2.41367	1.27123	up
GO:0005615	extracellular space	cellular_component	4	0	ENSRNOG00000021294	Mstn	myostatin [Source:RGD Symbol;Acc:3115]	0.239236	0.420771	0.61312	0	0	0	4243.76	12.0511	up
GO:0005615	extracellular space	cellular_component	4	0	ENSRNOG00000021441	Reln	reelin [Source:RGD Symbol;Acc:3553]	1.29369	0.821935	0.847471	0.404149	0.376892	0.356867	2.60398	1.38072	up
GO:0005615	extracellular space	cellular_component	4	0	ENSRNOG00000021619	Cela3b	chymotrypsin like elastase 3B [Source:RGD Symbol;Acc:1307819]	4.59201	1.0716	1.36544	0.246158	0.14853	0	17.8091	4.15455	up
GO:0005615	extracellular space	cellular_component	4	0	ENSRNOG00000021851	Ccl1	C-C motif chemokine ligand 1 [Source:RGD Symbol;Acc:1586495]	1.29096	0.891293	0.828182	0.159979	0	0	18.8177	4.23402	up
GO:0005615	extracellular space	cellular_component	4	0	ENSRNOG00000022298	Cxcl11	C-X-C motif chemokine ligand 11 [Source:RGD Symbol;Acc:727827]	0.612395	0.600572	0.531235	0.05833	0.123484	0.076764	6.74536	2.7539	up
GO:0005615	extracellular space	cellular_component	4	0	ENSRNOG00000022863	Lingo4	leucine rich repeat and Ig domain containing 4 [Source:RGD Symbol;Acc:1562025]	0.086743	0.047725	0.048942	0.270502	0.160031	0.144919	0.318723	-1.64962	down
GO:0005615	extracellular space	cellular_component	4	0	ENSRNOG00000023148	Col11a1	collagen type XI alpha 1 chain [Source:RGD Symbol;Acc:2372]	2.43824	0.601978	0.83106	0.137976	0.134476	0.179405	8.56748	3.09887	up
GO:0005615	extracellular space	cellular_component	4	0	ENSRNOG00000023643	Mmp17	matrix metallopeptidase 17 [Source:RGD Symbol;Acc:1311541]	4.44504	5.58279	4.56778	1.30238	1.1677	2.24148	3.09783	1.63126	up
GO:0005615	extracellular space	cellular_component	4	0	ENSRNOG00000023683	Nog	noggin [Source:RGD Symbol;Acc:3183]	2.11527	1.40461	2.31452	0.699111	0.833725	0.961876	2.33871	1.22571	up
GO:0005615	extracellular space	cellular_component	4	0	ENSRNOG00000023858	Prss39	protease, serine, 39 [Source:RGD Symbol;Acc:1309276]	0.61737	0.670793	0.291965	1.21195	1.44285	1.75981	0.357932	-1.48224	down
GO:0005615	extracellular space	cellular_component	4	0	ENSRNOG00000023972	Col4a2	collagen type IV alpha 2 chain [Source:RGD Symbol;Acc:1308085]	134.643	170.785	148.447	55.5573	64.3337	79.1798	2.27997	1.18901	up
GO:0005615	extracellular space	cellular_component	4	0	ENSRNOG00000024082	Gldn	gliomedin [Source:RGD Symbol;Acc:727879]	0.261012	0.245792	0.018752	0.020811	0.020345	0	12.7699	3.67467	up
GO:0005615	extracellular space	cellular_component	4	0	ENSRNOG00000024330	Ngp	neutrophilic granule protein [Source:RGD Symbol;Acc:1308994]	0.927402	0.104527	0.151974	2.62374	1.88736	1.91283	0.184296	-2.4399	down
GO:0005615	extracellular space	cellular_component	4	0	ENSRNOG00000024631	Chadl	chondroadherin-like [Source:RGD Symbol;Acc:6504353]	0.626034	0.883143	0.749265	1.39616	1.88591	1.63064	0.459714	-1.12119	down
GO:0005615	extracellular space	cellular_component	4	0	ENSRNOG00000025001	Pcolce	procollagen C-endopeptidase enhancer [Source:RGD Symbol;Acc:3270]	91.1937	57.8994	71.8722	22.2554	16.594	23.1289	3.5652	1.83398	up
GO:0005615	extracellular space	cellular_component	4	0	ENSRNOG00000026053	Grem1	gremlin 1, DAN family BMP antagonist [Source:RGD Symbol;Acc:2359]	3.7397	1.86409	4.41153	0.100842	0.313149	0.14419	17.9428	4.16533	up
GO:0005615	extracellular space	cellular_component	4	0	ENSRNOG00000027096	Ctsw	cathepsin W [Source:RGD Symbol;Acc:1309354]	2.08638	3.55784	0.820635	5.92082	7.85561	4.04858	0.362685	-1.46321	down
GO:0005615	extracellular space	cellular_component	4	0	ENSRNOG00000027432	R3hdml	R3H domain containing-like [Source:RGD Symbol;Acc:1305296]	1.75133	0.473323	0.212749	0	0	0	8124.67	12.9881	up
GO:0005615	extracellular space	cellular_component	4	0	ENSRNOG00000027784	Tsku	tsukushi, small leucine rich proteoglycan [Source:RGD Symbol;Acc:1359311]	9.15417	6.01854	7.29771	2.11238	2.33101	2.57257	3.20276	1.67932	up
GO:0005615	extracellular space	cellular_component	4	0	ENSRNOG00000028896	A2m	alpha-2-macroglobulin-like [Source:RGD Symbol;Acc:6492449]	0.969297	0.540073	1.23508	0.200525	0.163322	0.066112	6.38305	2.67425	up
GO:0005615	extracellular space	cellular_component	4	0	ENSRNOG00000029668	Wfdc21	WAP four-disulfide core domain 21 [Source:RGD Symbol;Acc:1303147]	42.4787	4.49216	49.9258	7.06256	4.52273	2.52717	6.86603	2.77948	up
GO:0005615	extracellular space	cellular_component	4	0	ENSRNOG00000029768	Ccl12	chemokine (C-C motif) ligand 12 [Source:RGD Symbol;Acc:1309255]	6.0007	2.47451	2.57848	0	0.075135	0.603588	16.286	4.02556	up
GO:0005615	extracellular space	cellular_component	4	0	ENSRNOG00000029911	Cilp	cartilage intermediate layer protein [Source:RGD Symbol;Acc:1305124]	4.14124	1.91428	1.13979	0.819222	0.954336	1.27989	2.35646	1.23662	up
GO:0005615	extracellular space	cellular_component	4	0	ENSRNOG00000030093	Defa5	defensin alpha 5 [Source:RGD Symbol;Acc:727951]	0.31484	0	0.247739	1.65831	1.40795	1.09822	0.13509	-2.88801	down
GO:0005615	extracellular space	cellular_component	4	0	ENSRNOG00000030155	Bmp8a	bone morphogenetic protein 8a [Source:RGD Symbol;Acc:1585858]	0.24594	0.142431	0.13281	0.675516	0.572486	0.397535	0.316724	-1.6587	down
GO:0005615	extracellular space	cellular_component	4	0	ENSRNOG00000030187	Mmp12	matrix metallopeptidase 12 [Source:RGD Symbol;Acc:620195]	23.6153	23.6938	16.196	2.3016	0.393955	0.799687	18.169	4.18341	up
GO:0005615	extracellular space	cellular_component	4	0	ENSRNOG00000030253	Tafa3	TAFA chemokine like family member 3 [Source:RGD Symbol;Acc:1587462]	6.56414	5.48442	3.90069	11.6475	14.912	10.4742	0.430669	-1.21535	down
GO:0005615	extracellular space	cellular_component	4	0	ENSRNOG00000030387	Kng1	kininogen 1 [Source:RGD Symbol;Acc:1359376]	21.2306	13.4328	16.0391	1.66566	2.34674	4.32674	6.08007	2.60409	up
GO:0005615	extracellular space	cellular_component	4	0	ENSRNOG00000030729	C4b	complement C4B (Chido blood group) [Source:RGD Symbol;Acc:1591983]	148.236	96.3311	177.334	61.2505	54.7645	47.2938	2.58345	1.3693	up
GO:0005615	extracellular space	cellular_component	4	0	ENSRNOG00000031162	Ccl24	C-C motif chemokine ligand 24 [Source:RGD Symbol;Acc:1310245]	5.13001	4.48235	6.31795	1.67853	1.29167	1.65069	3.44746	1.78553	up
GO:0005615	extracellular space	cellular_component	4	0	ENSRNOG00000031475	Col16a1	collagen type XVI alpha 1 chain [Source:RGD Symbol;Acc:1310982]	57.2427	51.0177	56.7959	19.2783	19.235	17.3131	2.9566	1.56394	up
GO:0005615	extracellular space	cellular_component	4	0	ENSRNOG00000033209	Bmp8b	bone morphogenetic protein 8b [Source:RGD Symbol;Acc:1591873]	0.366519	0.45209	0.546395	1.03207	1.66145	1.31074	0.340888	-1.55263	down
GO:0005615	extracellular space	cellular_component	4	0	ENSRNOG00000033352	S100a7a	S100 calcium binding protein A7A [Source:RGD Symbol;Acc:1593779]	0	0	0	0.144351	0.1751	0.246244	0.000530321	-10.8808	down
GO:0005615	extracellular space	cellular_component	4	0	ENSRNOG00000033527	Pappa1	pappalysin 1 [Source:RGD Symbol;Acc:1307742]	0.720924	0.38901	0.661715	0.190626	0.0554609	0.132972	4.67381	2.2246	up
GO:0005615	extracellular space	cellular_component	4	0	ENSRNOG00000033564	Cfd	complement factor D [Source:RGD Symbol;Acc:2498]	19.8564	16.2343	14.3704	10.3933	4.70205	6.43942	2.34324	1.22851	up
GO:0005615	extracellular space	cellular_component	4	0	ENSRNOG00000033619	Apof	apolipoprotein F [Source:RGD Symbol;Acc:1560713]	0	0	0	0.097181	0.082403	0.108153	0.00104262	-9.90557	down
GO:0005615	extracellular space	cellular_component	4	0	ENSRNOG00000033915	Gpt	glutamic--pyruvic transaminase [Source:RGD Symbol;Acc:621720]	25.0277	22.9063	27.1695	56.5881	55.0764	53.6412	0.454331	-1.13819	down
GO:0005615	extracellular space	cellular_component	4	0	ENSRNOG00000034290	Ccl21	C-C motif chemokine ligand 21 [Source:RGD Symbol;Acc:1311996]	171.913	158.057	123.877	70.7503	53.7025	41.4424	2.73575	1.45194	up
GO:0005615	extracellular space	cellular_component	4	0	ENSRNOG00000037853	Rarres1	retinoic acid receptor responder 1 [Source:RGD Symbol;Acc:1309509]	14.4827	9.13355	9.74621	3.74891	2.14311	3.63868	3.50053	1.80757	up
GO:0005615	extracellular space	cellular_component	4	0	ENSRNOG00000038126	Defb3	beta-defensin 3 [Source:RGD Symbol;Acc:1589572]	2.8242	1.80169	2.32766	0.446516	0.287194	0.192905	7.50425	2.90771	up
GO:0005615	extracellular space	cellular_component	4	0	ENSRNOG00000038135	RatNP-3b	defensin RatNP-3 precursor [Source:RGD Symbol;Acc:1589653]	0.298655	0	0.104052	0.904851	0.837612	1.46829	0.125424	-2.99511	down
GO:0005615	extracellular space	cellular_component	4	0	ENSRNOG00000039668	Col8a1	collagen type VIII alpha 1 chain [Source:RGD Symbol;Acc:1309361]	7.63818	9.19059	8.64372	1.20062	1.48089	1.47494	6.12843	2.61552	up
GO:0005615	extracellular space	cellular_component	4	0	ENSRNOG00000043342	LOC290595	hypothetical gene supported by AF152002 [Source:RGD Symbol;Acc:1566160]	0.495846	0.709836	0	0.873931	12.6402	1.47192	0.0804534	-3.6357	down
GO:0005615	extracellular space	cellular_component	4	0	ENSRNOG00000043451	Spp1	secreted phosphoprotein 1 [Source:RGD Symbol;Acc:3752]	129.555	106.043	88.3967	9.8296	1.21233	1.83191	25.1669	4.65346	up
GO:0005615	extracellular space	cellular_component	4	0	ENSRNOG00000045595	Tnfsf9	TNF superfamily member 9 [Source:RGD Symbol;Acc:727974]	2.88929	3.86285	2.14834	0.097061	0.890483	0.252154	7.17956	2.84389	up
GO:0005615	extracellular space	cellular_component	4	0	ENSRNOG00000045682	AABR07060992		0	0.128222	0	0.708619	0.136981	5.86374	0.019111	-5.70945	down
GO:0005615	extracellular space	cellular_component	4	0	ENSRNOG00000045772	LOC100911545	alpha-2-macroglobulin [Source:RGD Symbol;Acc:2004]	0.924814	0.42152	1.51115	0.255278	0.233575	0.071663	5.09795	2.34992	up
GO:0005615	extracellular space	cellular_component	4	0	ENSRNOG00000045829	Thbs1	thrombospondin 1 [Source:RGD Symbol;Acc:1588455]	69.4641	106.372	164.303	19.9347	19.858	26.7682	5.11019	2.35338	up
GO:0005615	extracellular space	cellular_component	4	0	ENSRNOG00000046449	Npy	neuropeptide Y [Source:RGD Symbol;Acc:3197]	5.83501	7.53937	12.3021	20.7918	13.0994	24.5613	0.43927	-1.18682	down
GO:0005615	extracellular space	cellular_component	4	0	ENSRNOG00000046936	AABR07051673		0	0	0	0.625056	0	1.86684	0.00012039	-13.02	down
GO:0005615	extracellular space	cellular_component	4	0	ENSRNOG00000047657	C4a	complement C4A [Source:RGD Symbol;Acc:620005]	237.873	241.958	309.397	129.43	75.4955	80.8113	2.76208	1.46576	up
GO:0005615	extracellular space	cellular_component	4	0	ENSRNOG00000048764	AABR07051675		0	0	0	0.548109	0	1.46538	0.000148995	-12.7124	down
GO:0005615	extracellular space	cellular_component	4	0	ENSRNOG00000049075	Fabp5	fatty acid binding protein 5 [Source:RGD Symbol;Acc:70997]	262.725	212.989	287.162	122.679	82.2738	81.2755	2.66527	1.41428	up
GO:0005615	extracellular space	cellular_component	4	0	ENSRNOG00000050534	Gcnt1	glucosaminyl (N-acetyl) transferase 1 [Source:RGD Symbol;Acc:621370]	8.27604	7.85306	5.52482	3.55186	3.24177	3.63304	2.07678	1.05435	up
GO:0005615	extracellular space	cellular_component	4	0	ENSRNOG00000050539	Fbln5	fibulin 5 [Source:RGD Symbol;Acc:2594]	75.8039	91.3075	58.3569	25.7062	25.9353	36.1296	2.56882	1.36111	up
GO:0005615	extracellular space	cellular_component	4	0	ENSRNOG00000050792	Tnfaip6	TNF alpha induced protein 6 [Source:RGD Symbol;Acc:621359]	2.6902	3.14756	4.01953	0.746881	0.432981	0.513021	5.82278	2.54171	up
GO:0005615	extracellular space	cellular_component	4	0	ENSRNOG00000052205	Fgf23	fibroblast growth factor 23 [Source:RGD Symbol;Acc:620178]	0.318321	0.976255	0.694014	0	0	0	6628.63	12.6945	up
GO:0005615	extracellular space	cellular_component	4	0	ENSRNOG00000053272	Chi3l1	chitinase 3 like 1 [Source:RGD Symbol;Acc:620874]	187.923	110.593	195.544	69.2241	52.2938	54.6498	2.80449	1.48774	up
GO:0005615	extracellular space	cellular_component	4	0	ENSRNOG00000053327	AABR07060953		1.4745	2.87739	1.12904	3.76307	3.14648	8.08896	0.365432	-1.45233	down
GO:0005615	extracellular space	cellular_component	4	0	ENSRNOG00000053494	Mcpt1l1	mast cell protease 1-like 1 [Source:RGD Symbol;Acc:2321286]	98.5586	20.0421	7.15613	1.23664	0.78863	1.70696	33.6949	5.07446	up
GO:0005615	extracellular space	cellular_component	4	0	ENSRNOG00000054428	AABR07060971		0.263899	0.48727	0.672911	5.31923	1.13606	5.18932	0.122295	-3.03156	down
GO:0005615	extracellular space	cellular_component	4	0	ENSRNOG00000055934	Dmkn	dermokine [Source:RGD Symbol;Acc:1561521]	0.723443	0.195589	0.682066	0	0.0626176	0.0484883	14.4106	3.84905	up
GO:0005615	extracellular space	cellular_component	4	0	ENSRNOG00000060381	Col15a1	collagen type XV alpha 1 chain [Source:RGD Symbol;Acc:1310820]	21.3702	31.2652	30.8648	2.72355	3.70059	6.38776	6.51739	2.70429	up
GO:0005615	extracellular space	cellular_component	4	0	ENSRNOG00000060654	AABR07061068		0.634833	0.191878	0	1.08529	0.377827	8.27935	0.0848565	-3.55883	down
GO:0005615	extracellular space	cellular_component	4	0	ENSRNOG00000061373	Loxl3	lysyl oxidase-like 3 [Source:RGD Symbol;Acc:1311011]	3.27172	3.4309	2.96157	1.31599	1.16898	1.3919	2.49279	1.31776	up
GO:0005615	extracellular space	cellular_component	4	0	ENSRNOG00000062030	Cers1	ceramide synthase 1 [Source:RGD Symbol;Acc:1305974]	0.441764	1.11004	0.488073	1.21572	1.53219	1.3981	0.49201	-1.02324	down
GO:0005615	extracellular space	cellular_component	4	0	ENSRNOG00000062101	Ace	angiotensin I converting enzyme [Source:RGD Symbol;Acc:2493]	116.54	162.976	113.041	251.855	283.285	379.239	0.429316	-1.21989	down
GO:0031012	extracellular matrix	cellular_component	4	0	ENSRNOG00000000341	Nid2	nidogen 2 [Source:RGD Symbol;Acc:1311685]	5.85374	5.92398	4.96026	2.31282	2.30347	2.63372	2.30869	1.20707	up
GO:0031012	extracellular matrix	cellular_component	4	0	ENSRNOG00000000463	Col11a2	collagen type XI alpha 2 chain [Source:RGD Symbol;Acc:2373]	0.500326	1.10928	0.443421	1.4898	1.50536	1.91439	0.41817	-1.25784	down
GO:0031012	extracellular matrix	cellular_component	4	0	ENSRNOG00000000597	Ccn6	cellular communication network factor 6 [Source:RGD Symbol;Acc:1564120]	0.035468	0.06511	0.023641	0.220389	0.283599	0.311317	0.152359	-2.71445	down
GO:0031012	extracellular matrix	cellular_component	4	0	ENSRNOG00000001249	Col6a1	collagen type VI alpha 1 chain [Source:RGD Symbol;Acc:1565398]	133.697	116.137	100.859	46.125	44.8447	58.8249	2.34116	1.22722	up
GO:0031012	extracellular matrix	cellular_component	4	0	ENSRNOG00000001254	Col6a2	collagen type VI alpha 2 chain [Source:RGD Symbol;Acc:1305585]	151.096	132.236	115.094	51.6944	53.0243	62.9982	2.37559	1.24829	up
GO:0031012	extracellular matrix	cellular_component	4	0	ENSRNOG00000002052	Ccdc80	coiled-coil domain containing 80 [Source:RGD Symbol;Acc:69421]	75.5538	48.2748	95.7677	28.6002	19.8306	18.9171	3.26063	1.70515	up
GO:0031012	extracellular matrix	cellular_component	4	0	ENSRNOG00000002093	Tgfbr3	transforming growth factor beta receptor 3 [Source:RGD Symbol;Acc:61821]	13.1989	16.2618	13.9274	33.5314	35.2539	39.6688	0.400058	-1.32172	down
GO:0031012	extracellular matrix	cellular_component	4	0	ENSRNOG00000002418	Tgfb2	transforming growth factor, beta 2 [Source:RGD Symbol;Acc:70491]	32.2616	34.4352	34.8496	12.3645	10.9716	12.4504	2.83756	1.50465	up
GO:0031012	extracellular matrix	cellular_component	4	0	ENSRNOG00000002461	Nid1	nidogen 1 [Source:RGD Symbol;Acc:3178]	27.7591	33.8089	25.3969	7.0868	7.3753	8.23495	3.83155	1.93793	up
GO:0031012	extracellular matrix	cellular_component	4	0	ENSRNOG00000002548	Tnn	tenascin N [Source:RGD Symbol;Acc:1306002]	3.51992	0.787354	1.0593	0.259756	0.338104	0.237335	6.42553	2.68382	up
GO:0031012	extracellular matrix	cellular_component	4	0	ENSRNOG00000003018	Olfml2b	olfactomedin-like 2B [Source:RGD Symbol;Acc:1309257]	12.2246	10.0175	13.5531	2.75388	1.92556	1.88733	5.45095	2.44651	up
GO:0031012	extracellular matrix	cellular_component	4	0	ENSRNOG00000003357	Col3a1	collagen type III alpha 1 chain [Source:RGD Symbol;Acc:71029]	773.166	628.281	469.974	156.474	148.568	159.465	4.02884	2.01036	up
GO:0031012	extracellular matrix	cellular_component	4	0	ENSRNOG00000003736	Col5a2	collagen type V alpha 2 chain [Source:RGD Symbol;Acc:70921]	97.1307	91.8408	82.7718	37.0816	38.9407	47.369	2.20229	1.139	up
GO:0031012	extracellular matrix	cellular_component	4	0	ENSRNOG00000003776	Amtn	amelotin [Source:RGD Symbol;Acc:1592356]	9.9121	8.17096	8.70068	2.53284	1.29441	2.48701	4.24178	2.08467	up
GO:0031012	extracellular matrix	cellular_component	4	0	ENSRNOG00000003897	Col1a1	collagen type I alpha 1 chain [Source:RGD Symbol;Acc:61817]	330.164	210.993	127.588	21.9343	20.0594	21.0288	10.6112	3.40752	up
GO:0031012	extracellular matrix	cellular_component	4	0	ENSRNOG00000004578	Cthrc1	collagen triple helix repeat containing 1 [Source:RGD Symbol;Acc:628801]	20.6941	8.67496	7.52358	1.74363	1.52406	1.42924	7.85464	2.97354	up
GO:0031012	extracellular matrix	cellular_component	4	0	ENSRNOG00000004610	Lum	lumican [Source:RGD Symbol;Acc:620984]	35.0811	13.503	14.0309	4.19002	2.93747	2.81793	6.29586	2.6544	up
GO:0031012	extracellular matrix	cellular_component	4	0	ENSRNOG00000005695	Mgp	matrix Gla protein [Source:RGD Symbol;Acc:3088]	1255.23	1265.23	1669.19	489.588	429.302	355.595	3.28734	1.71692	up
GO:0031012	extracellular matrix	cellular_component	4	0	ENSRNOG00000006778	Mmp19	matrix metallopeptidase 19 [Source:RGD Symbol;Acc:1311376]	22.3382	18.0888	17.5573	9.9295	8.98639	7.69105	2.17929	1.12386	up
GO:0031012	extracellular matrix	cellular_component	4	0	ENSRNOG00000007302	Fbn1	fibrillin 1 [Source:RGD Symbol;Acc:620908]	30.0541	29.7677	24.9997	8.20277	8.09057	8.42094	3.43208	1.77909	up
GO:0031012	extracellular matrix	cellular_component	4	0	ENSRNOG00000008246	Emilin1	elastin microfibril interfacer 1 [Source:RGD Symbol;Acc:1311209]	33.8479	31.5242	28.4099	12.5544	13.2388	13.7678	2.37056	1.24523	up
GO:0031012	extracellular matrix	cellular_component	4	0	ENSRNOG00000008336	Tnfrsf11b	TNF receptor superfamily member 11B [Source:RGD Symbol;Acc:619802]	15.8317	17.9665	17.8888	5.69922	5.57279	7.20068	2.79802	1.48441	up
GO:0031012	extracellular matrix	cellular_component	4	0	ENSRNOG00000008680	Loxl1	lysyl oxidase-like 1 [Source:RGD Symbol;Acc:1308752]	63.4442	58.285	47.428	14.3395	11.9453	14.514	4.14613	2.05176	up
GO:0031012	extracellular matrix	cellular_component	4	0	ENSRNOG00000008749	Col5a1	collagen type V alpha 1 chain [Source:RGD Symbol;Acc:70920]	26.8905	21.3001	17.3892	7.63965	8.60063	7.95309	2.71065	1.43864	up
GO:0031012	extracellular matrix	cellular_component	4	0	ENSRNOG00000009646	Nyx	nyctalopin [Source:RGD Symbol;Acc:1561300]	0	0	0.018017	0.284353	0.192044	0.287543	0.0235843	-5.40603	down
GO:0031012	extracellular matrix	cellular_component	4	0	ENSRNOG00000009867	Tgfb3	transforming growth factor, beta 3 [Source:RGD Symbol;Acc:3851]	28.04	20.6768	22.6266	8.0599	7.08636	6.45932	3.30208	1.72338	up
GO:0031012	extracellular matrix	cellular_component	4	0	ENSRNOG00000009907	Mmp8	matrix metallopeptidase 8 [Source:RGD Symbol;Acc:631408]	2.00547	1.65031	0.763331	3.84607	1.99292	4.16718	0.44164	-1.17906	down
GO:0031012	extracellular matrix	cellular_component	4	0	ENSRNOG00000010208	Timp1	TIMP metallopeptidase inhibitor 1 [Source:RGD Symbol;Acc:621675]	191.725	124.836	377.443	39.0496	29.0957	32.338	6.90666	2.78799	up
GO:0031012	extracellular matrix	cellular_component	4	0	ENSRNOG00000010529	Thbs2	thrombospondin 2 [Source:RGD Symbol;Acc:1310979]	16.9175	9.7328	15.9974	0.842375	0.59486	0.649489	20.4376	4.35316	up
GO:0031012	extracellular matrix	cellular_component	4	0	ENSRNOG00000010947	Mmp14	matrix metallopeptidase 14 [Source:RGD Symbol;Acc:620198]	73.5681	51.0079	51.6732	22.5951	16.4562	16.8319	3.15389	1.65713	up
GO:0031012	extracellular matrix	cellular_component	4	0	ENSRNOG00000011706	Mbl1	mannose-binding lectin (protein A) 1 [Source:RGD Symbol;Acc:3055]	2.56921	3.06382	2.73128	0.495776	1.10101	0.920711	3.32248	1.73226	up
GO:0031012	extracellular matrix	cellular_component	4	0	ENSRNOG00000012058	Egflam	EGF-like, fibronectin type III and laminin G domains [Source:RGD Symbol;Acc:1306592]	5.80616	6.93893	4.79697	2.05351	2.02171	3.25163	2.39421	1.25955	up
GO:0031012	extracellular matrix	cellular_component	4	0	ENSRNOG00000012216	Tgfbi	transforming growth factor, beta induced [Source:RGD Symbol;Acc:620017]	41.0144	25.3631	33.6917	15.6014	15.5471	14.7259	2.18138	1.12524	up
GO:0031012	extracellular matrix	cellular_component	4	0	ENSRNOG00000012280	Ptx3	pentraxin 3 [Source:RGD Symbol;Acc:1593476]	8.43453	3.34676	14.9743	0.836776	0.630793	0.793102	11.8352	3.56502	up
GO:0031012	extracellular matrix	cellular_component	4	0	ENSRNOG00000012660	Postn	periostin [Source:RGD Symbol;Acc:1305285]	317.385	321.176	267.696	117.573	99.7376	147.058	2.4872	1.31452	up
GO:0031012	extracellular matrix	cellular_component	4	0	ENSRNOG00000012840	Sparc	secreted protein acidic and cysteine rich [Source:RGD Symbol;Acc:3742]	1859.4	1712.29	1518.68	726.387	694.718	834.72	2.25655	1.17412	up
GO:0031012	extracellular matrix	cellular_component	4	0	ENSRNOG00000014288	Fn1	fibronectin 1 [Source:RGD Symbol;Acc:2624]	280.945	248.379	229.735	57.4707	64.5711	77.3481	3.80691	1.92862	up
GO:0031012	extracellular matrix	cellular_component	4	0	ENSRNOG00000014426	Lox	lysyl oxidase [Source:RGD Symbol;Acc:3015]	56.109	59.4426	61.512	17.4454	17.4535	21.6606	3.13057	1.64643	up
GO:0031012	extracellular matrix	cellular_component	4	0	ENSRNOG00000015036	Ccn2	cellular communication network factor 2 [Source:RGD Symbol;Acc:621392]	218.744	343.767	345.238	124.994	151.721	144.012	2.15757	1.10941	up
GO:0031012	extracellular matrix	cellular_component	4	0	ENSRNOG00000015618	Wnt5a	Wnt family member 5A [Source:RGD Symbol;Acc:69250]	7.40085	6.90616	6.99221	3.0348	2.5955	2.2052	2.7183	1.4427	up
GO:0031012	extracellular matrix	cellular_component	4	0	ENSRNOG00000016281	Col4a1	collagen type IV alpha 1 chain [Source:RGD Symbol;Acc:1307148]	228.604	293.978	253.367	78.1782	93.3833	113.433	2.72268	1.44503	up
GO:0031012	extracellular matrix	cellular_component	4	0	ENSRNOG00000016695	Mmp2	matrix metallopeptidase 2 [Source:RGD Symbol;Acc:621316]	112.629	84.3299	76.9475	30.7938	26.2646	32.2348	3.06749	1.61706	up
GO:0031012	extracellular matrix	cellular_component	4	0	ENSRNOG00000017237	Lama1	laminin subunit alpha 1 [Source:RGD Symbol;Acc:1307207]	0.012656	0.0023	0.040977	0	0	0	186.443	7.54259	up
GO:0031012	extracellular matrix	cellular_component	4	0	ENSRNOG00000017477	Mmp23	matrix metallopeptidase 23 [Source:RGD Symbol;Acc:620201]	9.53142	7.20412	8.46643	1.49011	1.53306	2.22156	4.8052	2.2646	up
GO:0031012	extracellular matrix	cellular_component	4	0	ENSRNOG00000017539	Mmp9	matrix metallopeptidase 9 [Source:RGD Symbol;Acc:621320]	0.708985	0.326444	0.167858	0.688657	1.06294	1.59762	0.359274	-1.47684	down
GO:0031012	extracellular matrix	cellular_component	4	0	ENSRNOG00000018059	Ihh	Indian hedgehog signaling molecule [Source:RGD Symbol;Acc:620021]	0.149505	0.246864	0.042178	0.508533	0.832047	0.848627	0.200322	-2.31961	down
GO:0031012	extracellular matrix	cellular_component	4	0	ENSRNOG00000018338	Vwa1	von Willebrand factor A domain containing 1 [Source:RGD Symbol;Acc:1311476]	11.376	7.54389	11.959	4.97604	3.71716	4.68247	2.30858	1.20701	up
GO:0031012	extracellular matrix	cellular_component	4	0	ENSRNOG00000018870	Hapln2	hyaluronan and proteoglycan link protein 2 [Source:RGD Symbol;Acc:621854]	0.057624	0.072877	0.098207	0.730127	0.617234	0.403329	0.130639	-2.93634	down
GO:0031012	extracellular matrix	cellular_component	4	0	ENSRNOG00000020525	Col5a3	collagen type V alpha 3 chain [Source:RGD Symbol;Acc:70922]	6.27947	4.20125	3.33351	1.45791	1.15799	1.30957	3.51913	1.81522	up
GO:0031012	extracellular matrix	cellular_component	4	0	ENSRNOG00000020579	Col7a1	collagen type VII alpha 1 chain [Source:RGD Symbol;Acc:1311417]	6.0876	5.0077	3.26195	1.88501	2.20626	1.57632	2.53322	1.34097	up
GO:0031012	extracellular matrix	cellular_component	4	0	ENSRNOG00000021441	Reln	reelin [Source:RGD Symbol;Acc:3553]	1.29369	0.821935	0.847471	0.404149	0.376892	0.356867	2.60398	1.38072	up
GO:0031012	extracellular matrix	cellular_component	4	0	ENSRNOG00000022863	Lingo4	leucine rich repeat and Ig domain containing 4 [Source:RGD Symbol;Acc:1562025]	0.086743	0.047725	0.048942	0.270502	0.160031	0.144919	0.318723	-1.64962	down
GO:0031012	extracellular matrix	cellular_component	4	0	ENSRNOG00000023148	Col11a1	collagen type XI alpha 1 chain [Source:RGD Symbol;Acc:2372]	2.43824	0.601978	0.83106	0.137976	0.134476	0.179405	8.56748	3.09887	up
GO:0031012	extracellular matrix	cellular_component	4	0	ENSRNOG00000023643	Mmp17	matrix metallopeptidase 17 [Source:RGD Symbol;Acc:1311541]	4.44504	5.58279	4.56778	1.30238	1.1677	2.24148	3.09783	1.63126	up
GO:0031012	extracellular matrix	cellular_component	4	0	ENSRNOG00000023972	Col4a2	collagen type IV alpha 2 chain [Source:RGD Symbol;Acc:1308085]	134.643	170.785	148.447	55.5573	64.3337	79.1798	2.27997	1.18901	up
GO:0031012	extracellular matrix	cellular_component	4	0	ENSRNOG00000024631	Chadl	chondroadherin-like [Source:RGD Symbol;Acc:6504353]	0.626034	0.883143	0.749265	1.39616	1.88591	1.63064	0.459714	-1.12119	down
GO:0031012	extracellular matrix	cellular_component	4	0	ENSRNOG00000030187	Mmp12	matrix metallopeptidase 12 [Source:RGD Symbol;Acc:620195]	23.6153	23.6938	16.196	2.3016	0.393955	0.799687	18.169	4.18341	up
GO:0031012	extracellular matrix	cellular_component	4	0	ENSRNOG00000031475	Col16a1	collagen type XVI alpha 1 chain [Source:RGD Symbol;Acc:1310982]	57.2427	51.0177	56.7959	19.2783	19.235	17.3131	2.9566	1.56394	up
GO:0031012	extracellular matrix	cellular_component	4	0	ENSRNOG00000039668	Col8a1	collagen type VIII alpha 1 chain [Source:RGD Symbol;Acc:1309361]	7.63818	9.19059	8.64372	1.20062	1.48089	1.47494	6.12843	2.61552	up
GO:0031012	extracellular matrix	cellular_component	4	0	ENSRNOG00000043219	Fbn2	fibrillin 2 [Source:RGD Symbol;Acc:620910]	0.242883	0.091204	0.036928	0.019889	0.007176	0.00671	10.9849	3.45745	up
GO:0031012	extracellular matrix	cellular_component	4	0	ENSRNOG00000045829	Thbs1	thrombospondin 1 [Source:RGD Symbol;Acc:1588455]	69.4641	106.372	164.303	19.9347	19.858	26.7682	5.11019	2.35338	up
GO:0031012	extracellular matrix	cellular_component	4	0	ENSRNOG00000055962	Bgn	biglycan [Source:RGD Symbol;Acc:2207]	230.436	234.828	255.606	79.8414	85.7927	80.5547	2.92812	1.54997	up
GO:0031012	extracellular matrix	cellular_component	4	0	ENSRNOG00000058645	Tnc	tenascin C [Source:RGD Symbol;Acc:621057]	32.8819	24.6221	38.6851	6.23045	5.06284	5.64608	5.67843	2.50549	up
GO:0031012	extracellular matrix	cellular_component	4	0	ENSRNOG00000060381	Col15a1	collagen type XV alpha 1 chain [Source:RGD Symbol;Acc:1310820]	21.3702	31.2652	30.8648	2.72355	3.70059	6.38776	6.51739	2.70429	up
GO:0031012	extracellular matrix	cellular_component	4	0	ENSRNOG00000061484	Adamts2	ADAM metallopeptidase with thrombospondin type 1 motif, 2 [Source:RGD Symbol;Acc:1565950]	29.7744	26.0212	21.5239	7.85753	7.14294	6.23486	3.64108	1.86437	up
GO:0005576	extracellular region	cellular_component	3	0	ENSRNOG00000000239	Ccl7	C-C motif chemokine ligand 7 [Source:RGD Symbol;Acc:1359152]	14.4232	11.1589	18.1968	0.946133	0.831492	2.17106	11.087	3.47079	up
GO:0005576	extracellular region	cellular_component	3	0	ENSRNOG00000000443	LOC103689965	complement C4-like [Source:RGD Symbol;Acc:9245878]	395.482	429.193	522.626	207.914	155.051	131.31	2.72582	1.44669	up
GO:0005576	extracellular region	cellular_component	3	0	ENSRNOG00000000597	Ccn6	cellular communication network factor 6 [Source:RGD Symbol;Acc:1564120]	0.035468	0.06511	0.023641	0.220389	0.283599	0.311317	0.152359	-2.71445	down
GO:0005576	extracellular region	cellular_component	3	0	ENSRNOG00000001249	Col6a1	collagen type VI alpha 1 chain [Source:RGD Symbol;Acc:1565398]	133.697	116.137	100.859	46.125	44.8447	58.8249	2.34116	1.22722	up
GO:0005576	extracellular region	cellular_component	3	0	ENSRNOG00000001254	Col6a2	collagen type VI alpha 2 chain [Source:RGD Symbol;Acc:1305585]	151.096	132.236	115.094	51.6944	53.0243	62.9982	2.37559	1.24829	up
GO:0005576	extracellular region	cellular_component	3	0	ENSRNOG00000001414	Serpine1	serpin family E member 1 [Source:RGD Symbol;Acc:3249]	55.409	67.7847	164.683	7.58747	10.5169	14.5605	8.81302	3.13964	up
GO:0005576	extracellular region	cellular_component	3	0	ENSRNOG00000001955	Retnla	resistin like alpha [Source:RGD Symbol;Acc:68349]	2152.93	1463.87	944.943	360.663	261.144	344.983	4.71845	2.23831	up
GO:0005576	extracellular region	cellular_component	3	0	ENSRNOG00000002052	Ccdc80	coiled-coil domain containing 80 [Source:RGD Symbol;Acc:69421]	75.5538	48.2748	95.7677	28.6002	19.8306	18.9171	3.26063	1.70515	up
GO:0005576	extracellular region	cellular_component	3	0	ENSRNOG00000002093	Tgfbr3	transforming growth factor beta receptor 3 [Source:RGD Symbol;Acc:61821]	13.1989	16.2618	13.9274	33.5314	35.2539	39.6688	0.400058	-1.32172	down
GO:0005576	extracellular region	cellular_component	3	0	ENSRNOG00000002158	Ibsp	integrin-binding sialoprotein [Source:RGD Symbol;Acc:2855]	2.52661	2.01495	2.65804	0.518978	0.429105	0.498763	4.97606	2.315	up
GO:0005576	extracellular region	cellular_component	3	0	ENSRNOG00000002418	Tgfb2	transforming growth factor, beta 2 [Source:RGD Symbol;Acc:70491]	32.2616	34.4352	34.8496	12.3645	10.9716	12.4504	2.83756	1.50465	up
GO:0005576	extracellular region	cellular_component	3	0	ENSRNOG00000002460	Serpinb2	serpin family B member 2 [Source:RGD Symbol;Acc:621823]	0.101316	0.088103	1.2141	0.067856	0	0.028711	14.5341	3.86137	up
GO:0005576	extracellular region	cellular_component	3	0	ENSRNOG00000002746	Fstl1	follistatin-like 1 [Source:RGD Symbol;Acc:68955]	76.3812	73.9106	69.2725	28.1826	25.0882	37.0014	2.43224	1.28229	up
GO:0005576	extracellular region	cellular_component	3	0	ENSRNOG00000002771	Ereg	epiregulin [Source:RGD Symbol;Acc:620299]	3.53527	6.81166	10.5663	3.01735	3.00566	2.96011	2.32806	1.21913	up
GO:0005576	extracellular region	cellular_component	3	0	ENSRNOG00000002831	Wfikkn2	WAP, follistatin/kazal, immunoglobulin, kunitz and netrin domain containing 2 [Source:RGD Symbol;Acc:1305361]	0.824461	0.619196	0.21568	0.223763	0.159189	0.24834	2.62848	1.39423	up
GO:0005576	extracellular region	cellular_component	3	0	ENSRNOG00000002937	Ren	renin [Source:RGD Symbol;Acc:3554]	0.210662	0.122506	0	0	0	0	1110.56	10.1171	up
GO:0005576	extracellular region	cellular_component	3	0	ENSRNOG00000002978	Faslg	Fas ligand [Source:RGD Symbol;Acc:3880]	0.816894	1.01133	0.807977	3.43662	5.79528	3.71874	0.203558	-2.29649	down
GO:0005576	extracellular region	cellular_component	3	0	ENSRNOG00000002984	Bmp15	bone morphogenetic protein 15 [Source:RGD Symbol;Acc:70990]	0.45701	0.765327	0.542995	2.39819	2.9696	2.67733	0.219429	-2.18817	down
GO:0005576	extracellular region	cellular_component	3	0	ENSRNOG00000003172	Serpinf1	serpin family F member 1 [Source:RGD Symbol;Acc:631369]	45.6714	23.7715	24.3167	5.34695	3.41355	6.33342	6.21175	2.635	up
GO:0005576	extracellular region	cellular_component	3	0	ENSRNOG00000003357	Col3a1	collagen type III alpha 1 chain [Source:RGD Symbol;Acc:71029]	773.166	628.281	469.974	156.474	148.568	159.465	4.02884	2.01036	up
GO:0005576	extracellular region	cellular_component	3	0	ENSRNOG00000003732	Flrt2	fibronectin leucine rich transmembrane protein 2 [Source:RGD Symbol;Acc:1308574]	5.80223	4.99289	14.0709	1.80281	2.04289	1.39731	4.74271	2.24571	up
GO:0005576	extracellular region	cellular_component	3	0	ENSRNOG00000003776	Amtn	amelotin [Source:RGD Symbol;Acc:1592356]	9.9121	8.17096	8.70068	2.53284	1.29441	2.48701	4.24178	2.08467	up
GO:0005576	extracellular region	cellular_component	3	0	ENSRNOG00000003897	Col1a1	collagen type I alpha 1 chain [Source:RGD Symbol;Acc:61817]	330.164	210.993	127.588	21.9343	20.0594	21.0288	10.6112	3.40752	up
GO:0005576	extracellular region	cellular_component	3	0	ENSRNOG00000004404	Tac4	tachykinin 4 [Source:RGD Symbol;Acc:628842]	5.30119	5.34132	4.09235	0.769295	0.661404	0.350317	8.27329	3.04846	up
GO:0005576	extracellular region	cellular_component	3	0	ENSRNOG00000004470	Il24	interleukin 24 [Source:RGD Symbol;Acc:621484]	4.71744	2.76935	8.35128	0.381472	0.213099	0.210391	19.6755	4.29833	up
GO:0005576	extracellular region	cellular_component	3	0	ENSRNOG00000004578	Cthrc1	collagen triple helix repeat containing 1 [Source:RGD Symbol;Acc:628801]	20.6941	8.67496	7.52358	1.74363	1.52406	1.42924	7.85464	2.97354	up
GO:0005576	extracellular region	cellular_component	3	0	ENSRNOG00000004610	Lum	lumican [Source:RGD Symbol;Acc:620984]	35.0811	13.503	14.0309	4.19002	2.93747	2.81793	6.29586	2.6544	up
GO:0005576	extracellular region	cellular_component	3	0	ENSRNOG00000005650	Pgf	placental growth factor [Source:RGD Symbol;Acc:619850]	4.74821	4.86013	6.89225	1.81335	1.74628	1.74662	3.10965	1.63675	up
GO:0005576	extracellular region	cellular_component	3	0	ENSRNOG00000005695	Mgp	matrix Gla protein [Source:RGD Symbol;Acc:3088]	1255.23	1265.23	1669.19	489.588	429.302	355.595	3.28734	1.71692	up
GO:0005576	extracellular region	cellular_component	3	0	ENSRNOG00000006579	Reg3g	regenerating family member 3 gamma [Source:RGD Symbol;Acc:3256]	3.69088	0.080361	3.74511	0	0	0	25054.5	14.6128	up
GO:0005576	extracellular region	cellular_component	3	0	ENSRNOG00000007002	Lif	LIF, interleukin 6 family cytokine [Source:RGD Symbol;Acc:620865]	2.79472	2.7336	5.46239	0.419517	0.645634	0.611047	6.55692	2.71302	up
GO:0005576	extracellular region	cellular_component	3	0	ENSRNOG00000007078	Ccn4	cellular communication network factor 4 [Source:RGD Symbol;Acc:69431]	0.981429	0.637733	1.09487	0.0284343	0	0.0276873	48.3598	5.59574	up
GO:0005576	extracellular region	cellular_component	3	0	ENSRNOG00000007159	Ccl2	C-C motif chemokine ligand 2 [Source:RGD Symbol;Acc:3645]	37.7066	18.9936	41.8423	1.20024	1.4775	2.90705	17.6448	4.14117	up
GO:0005576	extracellular region	cellular_component	3	0	ENSRNOG00000007300	C1qtnf6	C1q and TNF related 6 [Source:RGD Symbol;Acc:1307057]	8.43384	5.89115	3.80482	1.8543	2.50617	1.85512	2.91683	1.5444	up
GO:0005576	extracellular region	cellular_component	3	0	ENSRNOG00000007302	Fbn1	fibrillin 1 [Source:RGD Symbol;Acc:620908]	30.0541	29.7677	24.9997	8.20277	8.09057	8.42094	3.43208	1.77909	up
GO:0005576	extracellular region	cellular_component	3	0	ENSRNOG00000007335	Ccl11	C-C motif chemokine ligand 11 [Source:RGD Symbol;Acc:3644]	3.34409	1.3286	2.39904	6.15745	3.9376	18.2383	0.249591	-2.00236	down
GO:0005576	extracellular region	cellular_component	3	0	ENSRNOG00000007374	Tac1	tachykinin, precursor 1 [Source:RGD Symbol;Acc:3807]	0.715164	0.85091	1.28238	3.61698	2.4429	1.33902	0.384984	-1.37713	down
GO:0005576	extracellular region	cellular_component	3	0	ENSRNOG00000007468	Ifng	interferon gamma [Source:RGD Symbol;Acc:2866]	0	0	0	0.111509	0.315579	0.259981	0.000436637	-11.1613	down
GO:0005576	extracellular region	cellular_component	3	0	ENSRNOG00000007613	C1qtnf5	C1q and TNF related 5 [Source:RGD Symbol;Acc:1308802]	34.5553	31.8051	33.5564	10.6425	9.59122	10.8528	3.21415	1.68444	up
GO:0005576	extracellular region	cellular_component	3	0	ENSRNOG00000007765	Frzb	frizzled-related protein [Source:RGD Symbol;Acc:1311315]	7.73265	4.87263	8.7504	0.835247	1.32762	1.13202	6.48146	2.69632	up
GO:0005576	extracellular region	cellular_component	3	0	ENSRNOG00000007810	Gdf6	growth differentiation factor 6 [Source:RGD Symbol;Acc:620104]	0.222642	0.323762	0.898277	0.028828	0.075581	0.015319	12.0664	3.59292	up
GO:0005576	extracellular region	cellular_component	3	0	ENSRNOG00000008246	Emilin1	elastin microfibril interfacer 1 [Source:RGD Symbol;Acc:1311209]	33.8479	31.5242	28.4099	12.5544	13.2388	13.7678	2.37056	1.24523	up
GO:0005576	extracellular region	cellular_component	3	0	ENSRNOG00000008336	Tnfrsf11b	TNF receptor superfamily member 11B [Source:RGD Symbol;Acc:619802]	15.8317	17.9665	17.8888	5.69922	5.57279	7.20068	2.79802	1.48441	up
GO:0005576	extracellular region	cellular_component	3	0	ENSRNOG00000009291	Dnase1l3	deoxyribonuclease 1-like 3 [Source:RGD Symbol;Acc:620669]	1.97965	2.70537	1.75961	0.868144	0.996536	1.17733	2.11854	1.08307	up
GO:0005576	extracellular region	cellular_component	3	0	ENSRNOG00000009768	LOC100912228	pro-neuropeptide Y-like [Source:RGD Symbol;Acc:6487865]	5.52974	7.0638	11.5309	19.3687	12.1043	22.9197	0.443523	-1.17292	down
GO:0005576	extracellular region	cellular_component	3	0	ENSRNOG00000009772	Kirrel3	kirre like nephrin family adhesion molecule 3 [Source:RGD Symbol;Acc:1311382]	0.398434	0.0870737	0.296985	0.0744089	0.0865373	0.0818161	3.22329	1.68853	up
GO:0005576	extracellular region	cellular_component	3	0	ENSRNOG00000009867	Tgfb3	transforming growth factor, beta 3 [Source:RGD Symbol;Acc:3851]	28.04	20.6768	22.6266	8.0599	7.08636	6.45932	3.30208	1.72338	up
GO:0005576	extracellular region	cellular_component	3	0	ENSRNOG00000009884	Lgals1	galectin 1 [Source:RGD Symbol;Acc:69355]	435.47	271.097	396.875	222.629	158.549	127.526	2.16912	1.11711	up
GO:0005576	extracellular region	cellular_component	3	0	ENSRNOG00000010208	Timp1	TIMP metallopeptidase inhibitor 1 [Source:RGD Symbol;Acc:621675]	191.725	124.836	377.443	39.0496	29.0957	32.338	6.90666	2.78799	up
GO:0005576	extracellular region	cellular_component	3	0	ENSRNOG00000010278	Il6	interleukin 6 [Source:RGD Symbol;Acc:2901]	3.16485	2.11915	11.0231	0.116354	0.115796	0.224046	35.7458	5.1597	up
GO:0005576	extracellular region	cellular_component	3	0	ENSRNOG00000010513	Tfpi2	tissue factor pathway inhibitor 2 [Source:RGD Symbol;Acc:628629]	2.00105	1.77887	4.74033	0.380949	0.387955	0.301121	7.96267	2.99325	up
GO:0005576	extracellular region	cellular_component	3	0	ENSRNOG00000010529	Thbs2	thrombospondin 2 [Source:RGD Symbol;Acc:1310979]	16.9175	9.7328	15.9974	0.842375	0.59486	0.649489	20.4376	4.35316	up
GO:0005576	extracellular region	cellular_component	3	0	ENSRNOG00000010797	Esm1	endothelial cell-specific molecule 1 [Source:RGD Symbol;Acc:71013]	0.637304	0.835068	0.784875	5.29472	4.49361	5.41798	0.148442	-2.75203	down
GO:0005576	extracellular region	cellular_component	3	0	ENSRNOG00000010832	Pdgfrl	platelet-derived growth factor receptor-like [Source:RGD Symbol;Acc:1308028]	6.203	4.06276	2.66956	0.90916	1.0329	1.22418	4.08538	2.03047	up
GO:0005576	extracellular region	cellular_component	3	0	ENSRNOG00000010898	Prok2	prokineticin 2 [Source:RGD Symbol;Acc:620280]	0.091248	0	0	0.839639	0.365563	0.909689	0.0431455	-4.53465	down
GO:0005576	extracellular region	cellular_component	3	0	ENSRNOG00000010906	Ccl5	C-C motif chemokine ligand 5 [Source:RGD Symbol;Acc:69069]	33.6073	45.533	17.0812	161.621	269.977	147.801	0.166071	-2.59013	down
GO:0005576	extracellular region	cellular_component	3	0	ENSRNOG00000010935	Cpb2	carboxypeptidase B2 [Source:RGD Symbol;Acc:71035]	0.66711	0.499583	0.757648	0.244928	0.291876	0.095584	3.04298	1.60548	up
GO:0005576	extracellular region	cellular_component	3	0	ENSRNOG00000011074	Calcb	calcitonin-related polypeptide, beta [Source:RGD Symbol;Acc:620997]	1.83807	1.04867	0.913895	0.138678	0	0.047576	20.4057	4.3509	up
GO:0005576	extracellular region	cellular_component	3	0	ENSRNOG00000011130	Calca	calcitonin-related polypeptide alpha [Source:RGD Symbol;Acc:2254]	0.0864105	0.283044	0.149482	0.762545	1.17682	1.38808	0.155957	-2.68078	down
GO:0005576	extracellular region	cellular_component	3	0	ENSRNOG00000011320	Igfbpl1	insulin-like growth factor binding protein-like 1 [Source:RGD Symbol;Acc:1305656]	0.295033	0.370416	0.127175	1.33343	1.75192	1.30268	0.180633	-2.46887	down
GO:0005576	extracellular region	cellular_component	3	0	ENSRNOG00000011631	Fst	follistatin [Source:RGD Symbol;Acc:2633]	15.1182	13.6322	18.0437	3.03205	2.47665	3.75114	5.05345	2.33727	up
GO:0005576	extracellular region	cellular_component	3	0	ENSRNOG00000011706	Mbl1	mannose-binding lectin (protein A) 1 [Source:RGD Symbol;Acc:3055]	2.56921	3.06382	2.73128	0.495776	1.10101	0.920711	3.32248	1.73226	up
GO:0005576	extracellular region	cellular_component	3	0	ENSRNOG00000011824	Trh	thyrotropin releasing hormone [Source:RGD Symbol;Acc:3903]	11.4467	6.09187	3.74237	0.058091	0	0.036293	225.472	7.8168	up
GO:0005576	extracellular region	cellular_component	3	0	ENSRNOG00000011946	Ptn	pleiotrophin [Source:RGD Symbol;Acc:3444]	7.08411	4.9815	4.90333	1.78003	1.39043	2.30363	3.09986	1.63221	up
GO:0005576	extracellular region	cellular_component	3	0	ENSRNOG00000012036	Pcsk5	proprotein convertase subtilisin/kexin type 5 [Source:RGD Symbol;Acc:620326]	9.04096	7.64478	5.71483	3.04202	2.71739	3.25211	2.48577	1.31369	up
GO:0005576	extracellular region	cellular_component	3	0	ENSRNOG00000012259	Il22ra2	interleukin 22 receptor subunit alpha 2 [Source:RGD Symbol;Acc:1303169]	0.262024	0.379088	0.267647	0.612504	0.932174	1.30493	0.318907	-1.64879	down
GO:0005576	extracellular region	cellular_component	3	0	ENSRNOG00000012640	Dpp7	dipeptidylpeptidase 7 [Source:RGD Symbol;Acc:71073]	64.5655	56.5833	53.7596	30.8807	27.5675	28.6084	2.00913	1.00657	up
GO:0005576	extracellular region	cellular_component	3	0	ENSRNOG00000012749	C1qb	complement C1q B chain [Source:RGD Symbol;Acc:2229]	68.8056	59.044	60.4535	22.5219	17.5828	21.0046	3.08141	1.62359	up
GO:0005576	extracellular region	cellular_component	3	0	ENSRNOG00000012804	C1qc	complement C1q C chain [Source:RGD Symbol;Acc:1306828]	74.9961	68.9488	69.0432	27.4504	22.6791	29.6529	2.66961	1.41663	up
GO:0005576	extracellular region	cellular_component	3	0	ENSRNOG00000012807	C1qa	complement C1q A chain [Source:RGD Symbol;Acc:1306716]	101.115	87.5529	87.2321	25.1176	20.886	29.14	3.67164	1.87642	up
GO:0005576	extracellular region	cellular_component	3	0	ENSRNOG00000012840	Sparc	secreted protein acidic and cysteine rich [Source:RGD Symbol;Acc:3742]	1859.4	1712.29	1518.68	726.387	694.718	834.72	2.25655	1.17412	up
GO:0005576	extracellular region	cellular_component	3	0	ENSRNOG00000013917	Igsf10	immunoglobulin superfamily, member 10 [Source:RGD Symbol;Acc:735030]	5.51759	4.49851	2.39926	2.06986	1.73153	1.93201	2.16544	1.11466	up
GO:0005576	extracellular region	cellular_component	3	0	ENSRNOG00000013973	Lcn2	lipocalin 2 [Source:RGD Symbol;Acc:69408]	1594.83	895.005	2315.86	265.381	192.039	198.689	7.32455	2.87274	up
GO:0005576	extracellular region	cellular_component	3	0	ENSRNOG00000014288	Fn1	fibronectin 1 [Source:RGD Symbol;Acc:2624]	280.945	248.379	229.735	57.4707	64.5711	77.3481	3.80691	1.92862	up
GO:0005576	extracellular region	cellular_component	3	0	ENSRNOG00000014320	Inhba	inhibin subunit beta A [Source:RGD Symbol;Acc:62074]	1.43305	0.871656	0.743097	0.170937	0.044034	0.019916	12.9756	3.69773	up
GO:0005576	extracellular region	cellular_component	3	0	ENSRNOG00000014385	Wnt2b	Wnt family member 2B [Source:RGD Symbol;Acc:69346]	1.93844	1.91525	1.50408	7.62981	5.39889	3.48382	0.324467	-1.62386	down
GO:0005576	extracellular region	cellular_component	3	0	ENSRNOG00000014426	Lox	lysyl oxidase [Source:RGD Symbol;Acc:3015]	56.109	59.4426	61.512	17.4454	17.4535	21.6606	3.13057	1.64643	up
GO:0005576	extracellular region	cellular_component	3	0	ENSRNOG00000015036	Ccn2	cellular communication network factor 2 [Source:RGD Symbol;Acc:621392]	218.744	343.767	345.238	124.994	151.721	144.012	2.15757	1.10941	up
GO:0005576	extracellular region	cellular_component	3	0	ENSRNOG00000015156	Gal	galanin and GMAP prepropeptide [Source:RGD Symbol;Acc:61954]	3.00749	6.39934	1.08286	0.483463	1.01067	0.118952	6.50286	2.70107	up
GO:0005576	extracellular region	cellular_component	3	0	ENSRNOG00000015461	Serpine2	serpin family E member 2 [Source:RGD Symbol;Acc:3748]	61.0568	43.5868	59.6911	18.6343	15.2167	14.1918	3.42059	1.77424	up
GO:0005576	extracellular region	cellular_component	3	0	ENSRNOG00000015468	Bpifb1	BPI fold containing family B, member 1 [Source:RGD Symbol;Acc:1563047]	35.088	29.7424	71.0405	1.40437	0.175501	0.130297	79.4489	6.31195	up
GO:0005576	extracellular region	cellular_component	3	0	ENSRNOG00000015618	Wnt5a	Wnt family member 5A [Source:RGD Symbol;Acc:69250]	7.40085	6.90616	6.99221	3.0348	2.5955	2.2052	2.7183	1.4427	up
GO:0005576	extracellular region	cellular_component	3	0	ENSRNOG00000015750	Wnt7b	Wnt family member 7B [Source:RGD Symbol;Acc:1311441]	1.76975	1.41713	2.20033	0.207026	0.670733	0.684039	3.44937	1.78633	up
GO:0005576	extracellular region	cellular_component	3	0	ENSRNOG00000015992	Ccl20	C-C motif chemokine ligand 20 [Source:RGD Symbol;Acc:3646]	3.55187	1.52624	2.52854	0.934769	1.07933	0.51172	3.01156	1.59051	up
GO:0005576	extracellular region	cellular_component	3	0	ENSRNOG00000016278	Ccl17	C-C motif chemokine ligand 17 [Source:RGD Symbol;Acc:619924]	3.89019	6.53501	5.24364	1.31455	3.29401	1.16464	2.71406	1.44045	up
GO:0005576	extracellular region	cellular_component	3	0	ENSRNOG00000016281	Col4a1	collagen type IV alpha 1 chain [Source:RGD Symbol;Acc:1307148]	228.604	293.978	253.367	78.1782	93.3833	113.433	2.72268	1.44503	up
GO:0005576	extracellular region	cellular_component	3	0	ENSRNOG00000016343	Dkk3	dickkopf WNT signaling pathway inhibitor 3 [Source:RGD Symbol;Acc:621846]	27.3947	26.2492	26.5912	10.0043	8.4514	9.72904	2.84676	1.50932	up
GO:0005576	extracellular region	cellular_component	3	0	ENSRNOG00000016535	Ccl22	C-C motif chemokine ligand 22 [Source:RGD Symbol;Acc:619933]	0.579045	2.03706	1.27757	0.082517	0.590059	0.297163	4.01517	2.00546	up
GO:0005576	extracellular region	cellular_component	3	0	ENSRNOG00000016571	Ngf	nerve growth factor [Source:RGD Symbol;Acc:1598328]	0.683532	0.348949	0.591755	0.156563	0.22621	0.0462036	3.78631	1.92079	up
GO:0005576	extracellular region	cellular_component	3	0	ENSRNOG00000016696	Angpt2	angiopoietin 2 [Source:RGD Symbol;Acc:621861]	8.59042	8.08431	6.18316	3.01199	2.77709	3.05503	2.58453	1.3699	up
GO:0005576	extracellular region	cellular_component	3	0	ENSRNOG00000016945	Pla2g2a	phospholipase A2 group IIA [Source:RGD Symbol;Acc:620857]	430.776	142.041	305.208	62.6552	8.5295	13.1795	10.4076	3.37956	up
GO:0005576	extracellular region	cellular_component	3	0	ENSRNOG00000017759	Ucn3	urocortin 3 [Source:RGD Symbol;Acc:1562213]	0.069837	0.271317	0.666331	0	0	0	3358.28	11.7135	up
GO:0005576	extracellular region	cellular_component	3	0	ENSRNOG00000017873	Sct	secretin [Source:RGD Symbol;Acc:3643]	2.3567	3.70786	3.37265	0.308273	0.702983	0.388027	6.74431	2.75367	up
GO:0005576	extracellular region	cellular_component	3	0	ENSRNOG00000018257	Hpx	hemopexin [Source:RGD Symbol;Acc:62040]	4.72321	3.68476	5.32204	1.65765	1.55564	2.56035	2.37805	1.24978	up
GO:0005576	extracellular region	cellular_component	3	0	ENSRNOG00000018338	Vwa1	von Willebrand factor A domain containing 1 [Source:RGD Symbol;Acc:1311476]	11.376	7.54389	11.959	4.97604	3.71716	4.68247	2.30858	1.20701	up
GO:0005576	extracellular region	cellular_component	3	0	ENSRNOG00000018570	C1qtnf3	C1q and TNF related 3 [Source:RGD Symbol;Acc:1305010]	7.82166	0.700342	0.111767	0	0	0	28779.2	14.8127	up
GO:0005576	extracellular region	cellular_component	3	0	ENSRNOG00000018991	Gsn	gelsolin [Source:RGD Symbol;Acc:1303089]	421.812	450.543	281.254	1095.5	923.271	1115.79	0.368029	-1.44211	down
GO:0005576	extracellular region	cellular_component	3	0	ENSRNOG00000019138	Clec11a	C-type lectin domain containing 11A [Source:RGD Symbol;Acc:3627]	2.21488	1.61767	1.58088	0.299434	0.084132	0.026429	13.2036	3.72286	up
GO:0005576	extracellular region	cellular_component	3	0	ENSRNOG00000019350	Lyzl4	lysozyme-like 4 [Source:RGD Symbol;Acc:1308401]	0.544092	0.653479	0.058003	0	0	0	4185.25	12.0311	up
GO:0005576	extracellular region	cellular_component	3	0	ENSRNOG00000019445	Msln	mesothelin [Source:RGD Symbol;Acc:69333]	152.008	110.629	159.538	55.1951	30.864	26.1269	3.76317	1.91195	up
GO:0005576	extracellular region	cellular_component	3	0	ENSRNOG00000019695	Il17b	interleukin 17B [Source:RGD Symbol;Acc:620614]	1.02491	1.03218	0.807308	0.063734	0.31913	0.242836	4.57791	2.19469	up
GO:0005576	extracellular region	cellular_component	3	0	ENSRNOG00000019846	Muc5b	mucin 5B, oligomeric mucus/gel-forming [Source:RGD Symbol;Acc:1561983]	2.61124	2.75078	0.604843	0.486337	0.621036	0.533809	3.63571	1.86224	up
GO:0005576	extracellular region	cellular_component	3	0	ENSRNOG00000020533	Htra1	HtrA serine peptidase 1 [Source:RGD Symbol;Acc:69235]	85.3305	79.1533	114.318	41.5745	38.9896	41.6878	2.28055	1.18938	up
GO:0005576	extracellular region	cellular_component	3	0	ENSRNOG00000020563	Cma1	chymase 1 [Source:RGD Symbol;Acc:2365]	39.918	10.9509	5.28186	1.65773	1.49175	1.16244	13.0222	3.7029	up
GO:0005576	extracellular region	cellular_component	3	0	ENSRNOG00000020729	Stc2	stanniocalcin 2 [Source:RGD Symbol;Acc:621777]	1.46076	1.70758	1.6551	4.34007	5.11484	5.07347	0.332001	-1.59074	down
GO:0005576	extracellular region	cellular_component	3	0	ENSRNOG00000020733	Camp	cathelicidin antimicrobial peptide [Source:RGD Symbol;Acc:1559878]	1.35987	0.998778	1.40631	2.74325	2.92398	3.19669	0.42475	-1.23531	down
GO:0005576	extracellular region	cellular_component	3	0	ENSRNOG00000021029	Hamp	hepcidin antimicrobial peptide [Source:RGD Symbol;Acc:70971]	0.685082	0.809251	0.93874	0.114888	0	0	21.1778	4.40448	up
GO:0005576	extracellular region	cellular_component	3	0	ENSRNOG00000021276	Bmp2	bone morphogenetic protein 2 [Source:RGD Symbol;Acc:2211]	3.40519	7.43167	5.53057	2.54594	1.70193	2.53326	2.41367	1.27123	up
GO:0005576	extracellular region	cellular_component	3	0	ENSRNOG00000021294	Mstn	myostatin [Source:RGD Symbol;Acc:3115]	0.239236	0.420771	0.61312	0	0	0	4243.76	12.0511	up
GO:0005576	extracellular region	cellular_component	3	0	ENSRNOG00000021851	Ccl1	C-C motif chemokine ligand 1 [Source:RGD Symbol;Acc:1586495]	1.29096	0.891293	0.828182	0.159979	0	0	18.8177	4.23402	up
GO:0005576	extracellular region	cellular_component	3	0	ENSRNOG00000022298	Cxcl11	C-X-C motif chemokine ligand 11 [Source:RGD Symbol;Acc:727827]	0.612395	0.600572	0.531235	0.05833	0.123484	0.076764	6.74536	2.7539	up
GO:0005576	extracellular region	cellular_component	3	0	ENSRNOG00000023122	Apol11a	apolipoprotein L 11a [Source:NCBI gene;Acc:300060]	24.7764	28.9977	19.5004	50.9663	73.0298	68.7908	0.38008	-1.39562	down
GO:0005576	extracellular region	cellular_component	3	0	ENSRNOG00000023148	Col11a1	collagen type XI alpha 1 chain [Source:RGD Symbol;Acc:2372]	2.43824	0.601978	0.83106	0.137976	0.134476	0.179405	8.56748	3.09887	up
GO:0005576	extracellular region	cellular_component	3	0	ENSRNOG00000023683	Nog	noggin [Source:RGD Symbol;Acc:3183]	2.11527	1.40461	2.31452	0.699111	0.833725	0.961876	2.33871	1.22571	up
GO:0005576	extracellular region	cellular_component	3	0	ENSRNOG00000023858	Prss39	protease, serine, 39 [Source:RGD Symbol;Acc:1309276]	0.61737	0.670793	0.291965	1.21195	1.44285	1.75981	0.357932	-1.48224	down
GO:0005576	extracellular region	cellular_component	3	0	ENSRNOG00000023972	Col4a2	collagen type IV alpha 2 chain [Source:RGD Symbol;Acc:1308085]	134.643	170.785	148.447	55.5573	64.3337	79.1798	2.27997	1.18901	up
GO:0005576	extracellular region	cellular_component	3	0	ENSRNOG00000024221	Mettl24	methyltransferase like 24 [Source:RGD Symbol;Acc:1564857]	3.12121	3.09098	2.05659	4.91004	4.51143	7.27904	0.495121	-1.01415	down
GO:0005576	extracellular region	cellular_component	3	0	ENSRNOG00000024330	Ngp	neutrophilic granule protein [Source:RGD Symbol;Acc:1308994]	0.927402	0.104527	0.151974	2.62374	1.88736	1.91283	0.184296	-2.4399	down
GO:0005576	extracellular region	cellular_component	3	0	ENSRNOG00000025001	Pcolce	procollagen C-endopeptidase enhancer [Source:RGD Symbol;Acc:3270]	91.1937	57.8994	71.8722	22.2554	16.594	23.1289	3.5652	1.83398	up
GO:0005576	extracellular region	cellular_component	3	0	ENSRNOG00000026053	Grem1	gremlin 1, DAN family BMP antagonist [Source:RGD Symbol;Acc:2359]	3.7397	1.86409	4.41153	0.100842	0.313149	0.14419	17.9428	4.16533	up
GO:0005576	extracellular region	cellular_component	3	0	ENSRNOG00000027801	Zpbp	zona pellucida binding protein [Source:RGD Symbol;Acc:1563985]	0	0	0	0.094269	0.048362	0.179848	0.000930293	-10.07	down
GO:0005576	extracellular region	cellular_component	3	0	ENSRNOG00000028896	A2m	alpha-2-macroglobulin-like [Source:RGD Symbol;Acc:6492449]	0.969297	0.540073	1.23508	0.200525	0.163322	0.066112	6.38305	2.67425	up
GO:0005576	extracellular region	cellular_component	3	0	ENSRNOG00000029668	Wfdc21	WAP four-disulfide core domain 21 [Source:RGD Symbol;Acc:1303147]	42.4787	4.49216	49.9258	7.06256	4.52273	2.52717	6.86603	2.77948	up
GO:0005576	extracellular region	cellular_component	3	0	ENSRNOG00000029768	Ccl12	chemokine (C-C motif) ligand 12 [Source:RGD Symbol;Acc:1309255]	6.0007	2.47451	2.57848	0	0.075135	0.603588	16.286	4.02556	up
GO:0005576	extracellular region	cellular_component	3	0	ENSRNOG00000030093	Defa5	defensin alpha 5 [Source:RGD Symbol;Acc:727951]	0.31484	0	0.247739	1.65831	1.40795	1.09822	0.13509	-2.88801	down
GO:0005576	extracellular region	cellular_component	3	0	ENSRNOG00000030155	Bmp8a	bone morphogenetic protein 8a [Source:RGD Symbol;Acc:1585858]	0.24594	0.142431	0.13281	0.675516	0.572486	0.397535	0.316724	-1.6587	down
GO:0005576	extracellular region	cellular_component	3	0	ENSRNOG00000030210	Fndc1	fibronectin type III domain containing 1 [Source:RGD Symbol;Acc:1310640]	17.1924	12.5867	13.1415	1.25299	1.0536	1.43461	11.4724	3.52009	up
GO:0005576	extracellular region	cellular_component	3	0	ENSRNOG00000030387	Kng1	kininogen 1 [Source:RGD Symbol;Acc:1359376]	21.2306	13.4328	16.0391	1.66566	2.34674	4.32674	6.08007	2.60409	up
GO:0005576	extracellular region	cellular_component	3	0	ENSRNOG00000030729	C4b	complement C4B (Chido blood group) [Source:RGD Symbol;Acc:1591983]	148.236	96.3311	177.334	61.2505	54.7645	47.2938	2.58345	1.3693	up
GO:0005576	extracellular region	cellular_component	3	0	ENSRNOG00000031162	Ccl24	C-C motif chemokine ligand 24 [Source:RGD Symbol;Acc:1310245]	5.13001	4.48235	6.31795	1.67853	1.29167	1.65069	3.44746	1.78553	up
GO:0005576	extracellular region	cellular_component	3	0	ENSRNOG00000033162	Chia	chitinase, acidic [Source:RGD Symbol;Acc:1303058]	315.521	274.274	276.963	42.9052	74.2031	66.9686	4.70867	2.23532	up
GO:0005576	extracellular region	cellular_component	3	0	ENSRNOG00000033209	Bmp8b	bone morphogenetic protein 8b [Source:RGD Symbol;Acc:1591873]	0.366519	0.45209	0.546395	1.03207	1.66145	1.31074	0.340888	-1.55263	down
GO:0005576	extracellular region	cellular_component	3	0	ENSRNOG00000033527	Pappa1	pappalysin 1 [Source:RGD Symbol;Acc:1307742]	0.720924	0.38901	0.661715	0.190626	0.0554609	0.132972	4.67381	2.2246	up
GO:0005576	extracellular region	cellular_component	3	0	ENSRNOG00000033619	Apof	apolipoprotein F [Source:RGD Symbol;Acc:1560713]	0	0	0	0.097181	0.082403	0.108153	0.00104262	-9.90557	down
GO:0005576	extracellular region	cellular_component	3	0	ENSRNOG00000034290	Ccl21	C-C motif chemokine ligand 21 [Source:RGD Symbol;Acc:1311996]	171.913	158.057	123.877	70.7503	53.7025	41.4424	2.73575	1.45194	up
GO:0005576	extracellular region	cellular_component	3	0	ENSRNOG00000036685	Npb	neuropeptide B [Source:RGD Symbol;Acc:708513]	4.21014	3.5521	5.03871	0.877082	0.475219	1.03771	5.35602	2.42116	up
GO:0005576	extracellular region	cellular_component	3	0	ENSRNOG00000037097	Wfdc18	WAP four-disulfide core domain 18 [Source:RGD Symbol;Acc:619957]	2.14484	0.433771	11.1691	0.177989	0	0.378408	24.7085	4.62693	up
GO:0005576	extracellular region	cellular_component	3	0	ENSRNOG00000038126	Defb3	beta-defensin 3 [Source:RGD Symbol;Acc:1589572]	2.8242	1.80169	2.32766	0.446516	0.287194	0.192905	7.50425	2.90771	up
GO:0005576	extracellular region	cellular_component	3	0	ENSRNOG00000038135	RatNP-3b	defensin RatNP-3 precursor [Source:RGD Symbol;Acc:1589653]	0.298655	0	0.104052	0.904851	0.837612	1.46829	0.125424	-2.99511	down
GO:0005576	extracellular region	cellular_component	3	0	ENSRNOG00000039668	Col8a1	collagen type VIII alpha 1 chain [Source:RGD Symbol;Acc:1309361]	7.63818	9.19059	8.64372	1.20062	1.48089	1.47494	6.12843	2.61552	up
GO:0005576	extracellular region	cellular_component	3	0	ENSRNOG00000043219	Fbn2	fibrillin 2 [Source:RGD Symbol;Acc:620910]	0.242883	0.091204	0.036928	0.019889	0.007176	0.00671	10.9849	3.45745	up
GO:0005576	extracellular region	cellular_component	3	0	ENSRNOG00000043342	LOC290595	hypothetical gene supported by AF152002 [Source:RGD Symbol;Acc:1566160]	0.495846	0.709836	0	0.873931	12.6402	1.47192	0.0804534	-3.6357	down
GO:0005576	extracellular region	cellular_component	3	0	ENSRNOG00000043451	Spp1	secreted phosphoprotein 1 [Source:RGD Symbol;Acc:3752]	129.555	106.043	88.3967	9.8296	1.21233	1.83191	25.1669	4.65346	up
GO:0005576	extracellular region	cellular_component	3	0	ENSRNOG00000045772	LOC100911545	alpha-2-macroglobulin [Source:RGD Symbol;Acc:2004]	0.924814	0.42152	1.51115	0.255278	0.233575	0.071663	5.09795	2.34992	up
GO:0005576	extracellular region	cellular_component	3	0	ENSRNOG00000045829	Thbs1	thrombospondin 1 [Source:RGD Symbol;Acc:1588455]	69.4641	106.372	164.303	19.9347	19.858	26.7682	5.11019	2.35338	up
GO:0005576	extracellular region	cellular_component	3	0	ENSRNOG00000046449	Npy	neuropeptide Y [Source:RGD Symbol;Acc:3197]	5.83501	7.53937	12.3021	20.7918	13.0994	24.5613	0.43927	-1.18682	down
GO:0005576	extracellular region	cellular_component	3	0	ENSRNOG00000046566	Tub	tubby bipartite transcription factor [Source:RGD Symbol;Acc:3918]	0.312227	0.320111	1.0491	0.119992	0.108235	0.111905	4.9435	2.30553	up
GO:0005576	extracellular region	cellular_component	3	0	ENSRNOG00000046848	PCOLCE2	procollagen C-endopeptidase enhancer 2 [Source:RGD Symbol;Acc:1595195]	5.81048	6.81291	4.70162	20.8649	18.564	20.1305	0.290887	-1.78147	down
GO:0005576	extracellular region	cellular_component	3	0	ENSRNOG00000046958	Abo	ABO, alpha 1-3-N-acetylgalactosaminyltransferase and alpha 1-3-galactosyltransferase [Source:RGD Symbol;Acc:2307241]	4.12501	2.95025	2.83983	1.35281	1.56672	1.35476	2.31971	1.21394	up
GO:0005576	extracellular region	cellular_component	3	0	ENSRNOG00000047657	C4a	complement C4A [Source:RGD Symbol;Acc:620005]	237.873	241.958	309.397	129.43	75.4955	80.8113	2.76208	1.46576	up
GO:0005576	extracellular region	cellular_component	3	0	ENSRNOG00000048451	Apol2	apolipoprotein L3-like [Source:RGD Symbol;Acc:6490440]	0.451894	0.250137	0.462857	1.17806	1.16087	1.21821	0.327479	-1.61052	down
GO:0005576	extracellular region	cellular_component	3	0	ENSRNOG00000048970	LOC100911804	apolipoprotein L, 2 [Source:RGD Symbol;Acc:1309591]	0.483762	0.314823	0.459403	1.34265	1.22771	1.29497	0.325454	-1.61948	down
GO:0005576	extracellular region	cellular_component	3	0	ENSRNOG00000049075	Fabp5	fatty acid binding protein 5 [Source:RGD Symbol;Acc:70997]	262.725	212.989	287.162	122.679	82.2738	81.2755	2.66527	1.41428	up
GO:0005576	extracellular region	cellular_component	3	0	ENSRNOG00000049991	Mcpt8l3	mast cell protease 8-like 3 [Source:RGD Symbol;Acc:1302975]	6.48812	1.91135	1.06625	0.881239	0.828065	0.794557	3.78045	1.91856	up
GO:0005576	extracellular region	cellular_component	3	0	ENSRNOG00000050539	Fbln5	fibulin 5 [Source:RGD Symbol;Acc:2594]	75.8039	91.3075	58.3569	25.7062	25.9353	36.1296	2.56882	1.36111	up
GO:0005576	extracellular region	cellular_component	3	0	ENSRNOG00000052205	Fgf23	fibroblast growth factor 23 [Source:RGD Symbol;Acc:620178]	0.318321	0.976255	0.694014	0	0	0	6628.63	12.6945	up
GO:0005576	extracellular region	cellular_component	3	0	ENSRNOG00000053272	Chi3l1	chitinase 3 like 1 [Source:RGD Symbol;Acc:620874]	187.923	110.593	195.544	69.2241	52.2938	54.6498	2.80449	1.48774	up
GO:0005576	extracellular region	cellular_component	3	0	ENSRNOG00000053494	Mcpt1l1	mast cell protease 1-like 1 [Source:RGD Symbol;Acc:2321286]	98.5586	20.0421	7.15613	1.23664	0.78863	1.70696	33.6949	5.07446	up
GO:0005576	extracellular region	cellular_component	3	0	ENSRNOG00000055962	Bgn	biglycan [Source:RGD Symbol;Acc:2207]	230.436	234.828	255.606	79.8414	85.7927	80.5547	2.92812	1.54997	up
GO:0005576	extracellular region	cellular_component	3	0	ENSRNOG00000057989	Zp2	zona pellucida glycoprotein 2 [Source:RGD Symbol;Acc:620605]	0.191461	0.0737545	0.10199	0.699623	0.577331	0.579675	0.197781	-2.33803	down
GO:0005576	extracellular region	cellular_component	3	0	ENSRNOG00000058645	Tnc	tenascin C [Source:RGD Symbol;Acc:621057]	32.8819	24.6221	38.6851	6.23045	5.06284	5.64608	5.67843	2.50549	up
GO:0005576	extracellular region	cellular_component	3	0	ENSRNOG00000061373	Loxl3	lysyl oxidase-like 3 [Source:RGD Symbol;Acc:1311011]	3.27172	3.4309	2.96157	1.31599	1.16898	1.3919	2.49279	1.31776	up
GO:0062023	collagen-containing extracellular matrix	cellular_component	5	2.5091e-13	ENSRNOG00000001254	Col6a2	collagen type VI alpha 2 chain [Source:RGD Symbol;Acc:1305585]	151.096	132.236	115.094	51.6944	53.0243	62.9982	2.37559	1.24829	up
GO:0062023	collagen-containing extracellular matrix	cellular_component	5	2.5091e-13	ENSRNOG00000001414	Serpine1	serpin family E member 1 [Source:RGD Symbol;Acc:3249]	55.409	67.7847	164.683	7.58747	10.5169	14.5605	8.81302	3.13964	up
GO:0062023	collagen-containing extracellular matrix	cellular_component	5	2.5091e-13	ENSRNOG00000001469	Eln	elastin [Source:RGD Symbol;Acc:67394]	1000.53	1074.75	759.619	73.1078	65.5134	68.0227	13.7187	3.77807	up
GO:0062023	collagen-containing extracellular matrix	cellular_component	5	2.5091e-13	ENSRNOG00000002093	Tgfbr3	transforming growth factor beta receptor 3 [Source:RGD Symbol;Acc:61821]	13.1989	16.2618	13.9274	33.5314	35.2539	39.6688	0.400058	-1.32172	down
GO:0062023	collagen-containing extracellular matrix	cellular_component	5	2.5091e-13	ENSRNOG00000002418	Tgfb2	transforming growth factor, beta 2 [Source:RGD Symbol;Acc:70491]	32.2616	34.4352	34.8496	12.3645	10.9716	12.4504	2.83756	1.50465	up
GO:0062023	collagen-containing extracellular matrix	cellular_component	5	2.5091e-13	ENSRNOG00000003357	Col3a1	collagen type III alpha 1 chain [Source:RGD Symbol;Acc:71029]	773.166	628.281	469.974	156.474	148.568	159.465	4.02884	2.01036	up
GO:0062023	collagen-containing extracellular matrix	cellular_component	5	2.5091e-13	ENSRNOG00000004610	Lum	lumican [Source:RGD Symbol;Acc:620984]	35.0811	13.503	14.0309	4.19002	2.93747	2.81793	6.29586	2.6544	up
GO:0062023	collagen-containing extracellular matrix	cellular_component	5	2.5091e-13	ENSRNOG00000005695	Mgp	matrix Gla protein [Source:RGD Symbol;Acc:3088]	1255.23	1265.23	1669.19	489.588	429.302	355.595	3.28734	1.71692	up
GO:0062023	collagen-containing extracellular matrix	cellular_component	5	2.5091e-13	ENSRNOG00000007302	Fbn1	fibrillin 1 [Source:RGD Symbol;Acc:620908]	30.0541	29.7677	24.9997	8.20277	8.09057	8.42094	3.43208	1.77909	up
GO:0062023	collagen-containing extracellular matrix	cellular_component	5	2.5091e-13	ENSRNOG00000008246	Emilin1	elastin microfibril interfacer 1 [Source:RGD Symbol;Acc:1311209]	33.8479	31.5242	28.4099	12.5544	13.2388	13.7678	2.37056	1.24523	up
GO:0062023	collagen-containing extracellular matrix	cellular_component	5	2.5091e-13	ENSRNOG00000008749	Col5a1	collagen type V alpha 1 chain [Source:RGD Symbol;Acc:70920]	26.8905	21.3001	17.3892	7.63965	8.60063	7.95309	2.71065	1.43864	up
GO:0062023	collagen-containing extracellular matrix	cellular_component	5	2.5091e-13	ENSRNOG00000009867	Tgfb3	transforming growth factor, beta 3 [Source:RGD Symbol;Acc:3851]	28.04	20.6768	22.6266	8.0599	7.08636	6.45932	3.30208	1.72338	up
GO:0062023	collagen-containing extracellular matrix	cellular_component	5	2.5091e-13	ENSRNOG00000010529	Thbs2	thrombospondin 2 [Source:RGD Symbol;Acc:1310979]	16.9175	9.7328	15.9974	0.842375	0.59486	0.649489	20.4376	4.35316	up
GO:0062023	collagen-containing extracellular matrix	cellular_component	5	2.5091e-13	ENSRNOG00000011706	Mbl1	mannose-binding lectin (protein A) 1 [Source:RGD Symbol;Acc:3055]	2.56921	3.06382	2.73128	0.495776	1.10101	0.920711	3.32248	1.73226	up
GO:0062023	collagen-containing extracellular matrix	cellular_component	5	2.5091e-13	ENSRNOG00000011800	F3	coagulation factor III, tissue factor [Source:RGD Symbol;Acc:2587]	167.292	169.907	352.923	54.9981	53.3236	44.8062	4.50683	2.17211	up
GO:0062023	collagen-containing extracellular matrix	cellular_component	5	2.5091e-13	ENSRNOG00000012660	Postn	periostin [Source:RGD Symbol;Acc:1305285]	317.385	321.176	267.696	117.573	99.7376	147.058	2.4872	1.31452	up
GO:0062023	collagen-containing extracellular matrix	cellular_component	5	2.5091e-13	ENSRNOG00000012840	Sparc	secreted protein acidic and cysteine rich [Source:RGD Symbol;Acc:3742]	1859.4	1712.29	1518.68	726.387	694.718	834.72	2.25655	1.17412	up
GO:0062023	collagen-containing extracellular matrix	cellular_component	5	2.5091e-13	ENSRNOG00000014288	Fn1	fibronectin 1 [Source:RGD Symbol;Acc:2624]	280.945	248.379	229.735	57.4707	64.5711	77.3481	3.80691	1.92862	up
GO:0062023	collagen-containing extracellular matrix	cellular_component	5	2.5091e-13	ENSRNOG00000015461	Serpine2	serpin family E member 2 [Source:RGD Symbol;Acc:3748]	61.0568	43.5868	59.6911	18.6343	15.2167	14.1918	3.42059	1.77424	up
GO:0062023	collagen-containing extracellular matrix	cellular_component	5	2.5091e-13	ENSRNOG00000018338	Vwa1	von Willebrand factor A domain containing 1 [Source:RGD Symbol;Acc:1311476]	11.376	7.54389	11.959	4.97604	3.71716	4.68247	2.30858	1.20701	up
GO:0062023	collagen-containing extracellular matrix	cellular_component	5	2.5091e-13	ENSRNOG00000020525	Col5a3	collagen type V alpha 3 chain [Source:RGD Symbol;Acc:70922]	6.27947	4.20125	3.33351	1.45791	1.15799	1.30957	3.51913	1.81522	up
GO:0062023	collagen-containing extracellular matrix	cellular_component	5	2.5091e-13	ENSRNOG00000020533	Htra1	HtrA serine peptidase 1 [Source:RGD Symbol;Acc:69235]	85.3305	79.1533	114.318	41.5745	38.9896	41.6878	2.28055	1.18938	up
GO:0062023	collagen-containing extracellular matrix	cellular_component	5	2.5091e-13	ENSRNOG00000020579	Col7a1	collagen type VII alpha 1 chain [Source:RGD Symbol;Acc:1311417]	6.0876	5.0077	3.26195	1.88501	2.20626	1.57632	2.53322	1.34097	up
GO:0062023	collagen-containing extracellular matrix	cellular_component	5	2.5091e-13	ENSRNOG00000023148	Col11a1	collagen type XI alpha 1 chain [Source:RGD Symbol;Acc:2372]	2.43824	0.601978	0.83106	0.137976	0.134476	0.179405	8.56748	3.09887	up
GO:0062023	collagen-containing extracellular matrix	cellular_component	5	2.5091e-13	ENSRNOG00000024631	Chadl	chondroadherin-like [Source:RGD Symbol;Acc:6504353]	0.626034	0.883143	0.749265	1.39616	1.88591	1.63064	0.459714	-1.12119	down
GO:0062023	collagen-containing extracellular matrix	cellular_component	5	2.5091e-13	ENSRNOG00000029911	Cilp	cartilage intermediate layer protein [Source:RGD Symbol;Acc:1305124]	4.14124	1.91428	1.13979	0.819222	0.954336	1.27989	2.35646	1.23662	up
GO:0062023	collagen-containing extracellular matrix	cellular_component	5	2.5091e-13	ENSRNOG00000039560	LOC103690116	osteomodulin [Source:RGD Symbol;Acc:9400356]	0.673123	0.945252	0.395326	2.35328	2.16044	1.96834	0.310658	-1.6866	down
GO:0062023	collagen-containing extracellular matrix	cellular_component	5	2.5091e-13	ENSRNOG00000045829	Thbs1	thrombospondin 1 [Source:RGD Symbol;Acc:1588455]	69.4641	106.372	164.303	19.9347	19.858	26.7682	5.11019	2.35338	up
GO:0062023	collagen-containing extracellular matrix	cellular_component	5	2.5091e-13	ENSRNOG00000046658	Omd	osteomodulin [Source:RGD Symbol;Acc:621818]	0.608261	0.820549	0.417281	1.98758	1.38739	1.961	0.345971	-1.53128	down
GO:0062023	collagen-containing extracellular matrix	cellular_component	5	2.5091e-13	ENSRNOG00000050539	Fbln5	fibulin 5 [Source:RGD Symbol;Acc:2594]	75.8039	91.3075	58.3569	25.7062	25.9353	36.1296	2.56882	1.36111	up
GO:0062023	collagen-containing extracellular matrix	cellular_component	5	2.5091e-13	ENSRNOG00000057989	Zp2	zona pellucida glycoprotein 2 [Source:RGD Symbol;Acc:620605]	0.191461	0.0737545	0.10199	0.699623	0.577331	0.579675	0.197781	-2.33803	down
GO:0062023	collagen-containing extracellular matrix	cellular_component	5	2.5091e-13	ENSRNOG00000058645	Tnc	tenascin C [Source:RGD Symbol;Acc:621057]	32.8819	24.6221	38.6851	6.23045	5.06284	5.64608	5.67843	2.50549	up
GO:0062023	collagen-containing extracellular matrix	cellular_component	5	2.5091e-13	ENSRNOG00000061484	Adamts2	ADAM metallopeptidase with thrombospondin type 1 motif, 2 [Source:RGD Symbol;Acc:1565950]	29.7744	26.0212	21.5239	7.85753	7.14294	6.23486	3.64108	1.86437	up
GO:0005581	collagen trimer	cellular_component	4	5.17031e-13	ENSRNOG00000000463	Col11a2	collagen type XI alpha 2 chain [Source:RGD Symbol;Acc:2373]	0.500326	1.10928	0.443421	1.4898	1.50536	1.91439	0.41817	-1.25784	down
GO:0005581	collagen trimer	cellular_component	4	5.17031e-13	ENSRNOG00000001254	Col6a2	collagen type VI alpha 2 chain [Source:RGD Symbol;Acc:1305585]	151.096	132.236	115.094	51.6944	53.0243	62.9982	2.37559	1.24829	up
GO:0005581	collagen trimer	cellular_component	4	5.17031e-13	ENSRNOG00000003357	Col3a1	collagen type III alpha 1 chain [Source:RGD Symbol;Acc:71029]	773.166	628.281	469.974	156.474	148.568	159.465	4.02884	2.01036	up
GO:0005581	collagen trimer	cellular_component	4	5.17031e-13	ENSRNOG00000003736	Col5a2	collagen type V alpha 2 chain [Source:RGD Symbol;Acc:70921]	97.1307	91.8408	82.7718	37.0816	38.9407	47.369	2.20229	1.139	up
GO:0005581	collagen trimer	cellular_component	4	5.17031e-13	ENSRNOG00000003897	Col1a1	collagen type I alpha 1 chain [Source:RGD Symbol;Acc:61817]	330.164	210.993	127.588	21.9343	20.0594	21.0288	10.6112	3.40752	up
GO:0005581	collagen trimer	cellular_component	4	5.17031e-13	ENSRNOG00000004578	Cthrc1	collagen triple helix repeat containing 1 [Source:RGD Symbol;Acc:628801]	20.6941	8.67496	7.52358	1.74363	1.52406	1.42924	7.85464	2.97354	up
GO:0005581	collagen trimer	cellular_component	4	5.17031e-13	ENSRNOG00000007300	C1qtnf6	C1q and TNF related 6 [Source:RGD Symbol;Acc:1307057]	8.43384	5.89115	3.80482	1.8543	2.50617	1.85512	2.91683	1.5444	up
GO:0005581	collagen trimer	cellular_component	4	5.17031e-13	ENSRNOG00000007613	C1qtnf5	C1q and TNF related 5 [Source:RGD Symbol;Acc:1308802]	34.5553	31.8051	33.5564	10.6425	9.59122	10.8528	3.21415	1.68444	up
GO:0005581	collagen trimer	cellular_component	4	5.17031e-13	ENSRNOG00000008246	Emilin1	elastin microfibril interfacer 1 [Source:RGD Symbol;Acc:1311209]	33.8479	31.5242	28.4099	12.5544	13.2388	13.7678	2.37056	1.24523	up
GO:0005581	collagen trimer	cellular_component	4	5.17031e-13	ENSRNOG00000008591	Colec10	collectin subfamily member 10 [Source:RGD Symbol;Acc:1307149]	0.208513	0.315592	0.391624	0.065495	0.078789	0.079641	4.08945	2.03191	up
GO:0005581	collagen trimer	cellular_component	4	5.17031e-13	ENSRNOG00000008749	Col5a1	collagen type V alpha 1 chain [Source:RGD Symbol;Acc:70920]	26.8905	21.3001	17.3892	7.63965	8.60063	7.95309	2.71065	1.43864	up
GO:0005581	collagen trimer	cellular_component	4	5.17031e-13	ENSRNOG00000011706	Mbl1	mannose-binding lectin (protein A) 1 [Source:RGD Symbol;Acc:3055]	2.56921	3.06382	2.73128	0.495776	1.10101	0.920711	3.32248	1.73226	up
GO:0005581	collagen trimer	cellular_component	4	5.17031e-13	ENSRNOG00000012749	C1qb	complement C1q B chain [Source:RGD Symbol;Acc:2229]	68.8056	59.044	60.4535	22.5219	17.5828	21.0046	3.08141	1.62359	up
GO:0005581	collagen trimer	cellular_component	4	5.17031e-13	ENSRNOG00000012804	C1qc	complement C1q C chain [Source:RGD Symbol;Acc:1306828]	74.9961	68.9488	69.0432	27.4504	22.6791	29.6529	2.66961	1.41663	up
GO:0005581	collagen trimer	cellular_component	4	5.17031e-13	ENSRNOG00000012807	C1qa	complement C1q A chain [Source:RGD Symbol;Acc:1306716]	101.115	87.5529	87.2321	25.1176	20.886	29.14	3.67164	1.87642	up
GO:0005581	collagen trimer	cellular_component	4	5.17031e-13	ENSRNOG00000014426	Lox	lysyl oxidase [Source:RGD Symbol;Acc:3015]	56.109	59.4426	61.512	17.4454	17.4535	21.6606	3.13057	1.64643	up
GO:0005581	collagen trimer	cellular_component	4	5.17031e-13	ENSRNOG00000016281	Col4a1	collagen type IV alpha 1 chain [Source:RGD Symbol;Acc:1307148]	228.604	293.978	253.367	78.1782	93.3833	113.433	2.72268	1.44503	up
GO:0005581	collagen trimer	cellular_component	4	5.17031e-13	ENSRNOG00000018570	C1qtnf3	C1q and TNF related 3 [Source:RGD Symbol;Acc:1305010]	7.82166	0.700342	0.111767	0	0	0	28779.2	14.8127	up
GO:0005581	collagen trimer	cellular_component	4	5.17031e-13	ENSRNOG00000020525	Col5a3	collagen type V alpha 3 chain [Source:RGD Symbol;Acc:70922]	6.27947	4.20125	3.33351	1.45791	1.15799	1.30957	3.51913	1.81522	up
GO:0005581	collagen trimer	cellular_component	4	5.17031e-13	ENSRNOG00000023148	Col11a1	collagen type XI alpha 1 chain [Source:RGD Symbol;Acc:2372]	2.43824	0.601978	0.83106	0.137976	0.134476	0.179405	8.56748	3.09887	up
GO:0005581	collagen trimer	cellular_component	4	5.17031e-13	ENSRNOG00000023972	Col4a2	collagen type IV alpha 2 chain [Source:RGD Symbol;Acc:1308085]	134.643	170.785	148.447	55.5573	64.3337	79.1798	2.27997	1.18901	up
GO:0005581	collagen trimer	cellular_component	4	5.17031e-13	ENSRNOG00000039197	LOC108348074	collagen alpha-1(XV) chain-like [Source:RGD Symbol;Acc:11464459]	12.5283	18.8748	22.1478	2.9943	2.28433	4.771	5.32864	2.41377	up
GO:0005581	collagen trimer	cellular_component	4	5.17031e-13	ENSRNOG00000039668	Col8a1	collagen type VIII alpha 1 chain [Source:RGD Symbol;Acc:1309361]	7.63818	9.19059	8.64372	1.20062	1.48089	1.47494	6.12843	2.61552	up
GO:0005581	collagen trimer	cellular_component	4	5.17031e-13	ENSRNOG00000060381	Col15a1	collagen type XV alpha 1 chain [Source:RGD Symbol;Acc:1310820]	21.3702	31.2652	30.8648	2.72355	3.70059	6.38776	6.51739	2.70429	up
GO:0030198	extracellular matrix organization	biological_process	6	2.05856e-11	ENSRNOG00000000463	Col11a2	collagen type XI alpha 2 chain [Source:RGD Symbol;Acc:2373]	0.500326	1.10928	0.443421	1.4898	1.50536	1.91439	0.41817	-1.25784	down
GO:0030198	extracellular matrix organization	biological_process	6	2.05856e-11	ENSRNOG00000001249	Col6a1	collagen type VI alpha 1 chain [Source:RGD Symbol;Acc:1565398]	133.697	116.137	100.859	46.125	44.8447	58.8249	2.34116	1.22722	up
GO:0030198	extracellular matrix organization	biological_process	6	2.05856e-11	ENSRNOG00000001469	Eln	elastin [Source:RGD Symbol;Acc:67394]	1000.53	1074.75	759.619	73.1078	65.5134	68.0227	13.7187	3.77807	up
GO:0030198	extracellular matrix organization	biological_process	6	2.05856e-11	ENSRNOG00000002052	Ccdc80	coiled-coil domain containing 80 [Source:RGD Symbol;Acc:69421]	75.5538	48.2748	95.7677	28.6002	19.8306	18.9171	3.26063	1.70515	up
GO:0030198	extracellular matrix organization	biological_process	6	2.05856e-11	ENSRNOG00000002158	Ibsp	integrin-binding sialoprotein [Source:RGD Symbol;Acc:2855]	2.52661	2.01495	2.65804	0.518978	0.429105	0.498763	4.97606	2.315	up
GO:0030198	extracellular matrix organization	biological_process	6	2.05856e-11	ENSRNOG00000002244	Pdgfra	platelet derived growth factor receptor alpha [Source:RGD Symbol;Acc:3284]	10.7913	10.4928	10.1398	22.5292	21.8926	24.1598	0.458196	-1.12596	down
GO:0030198	extracellular matrix organization	biological_process	6	2.05856e-11	ENSRNOG00000002461	Nid1	nidogen 1 [Source:RGD Symbol;Acc:3178]	27.7591	33.8089	25.3969	7.0868	7.3753	8.23495	3.83155	1.93793	up
GO:0030198	extracellular matrix organization	biological_process	6	2.05856e-11	ENSRNOG00000002607	Sox9	SRY box 9 [Source:RGD Symbol;Acc:620474]	0.120299	0.141518	0.108652	0.275685	0.369276	0.760508	0.263591	-1.92363	down
GO:0030198	extracellular matrix organization	biological_process	6	2.05856e-11	ENSRNOG00000003018	Olfml2b	olfactomedin-like 2B [Source:RGD Symbol;Acc:1309257]	12.2246	10.0175	13.5531	2.75388	1.92556	1.88733	5.45095	2.44651	up
GO:0030198	extracellular matrix organization	biological_process	6	2.05856e-11	ENSRNOG00000003357	Col3a1	collagen type III alpha 1 chain [Source:RGD Symbol;Acc:71029]	773.166	628.281	469.974	156.474	148.568	159.465	4.02884	2.01036	up
GO:0030198	extracellular matrix organization	biological_process	6	2.05856e-11	ENSRNOG00000003736	Col5a2	collagen type V alpha 2 chain [Source:RGD Symbol;Acc:70921]	97.1307	91.8408	82.7718	37.0816	38.9407	47.369	2.20229	1.139	up
GO:0030198	extracellular matrix organization	biological_process	6	2.05856e-11	ENSRNOG00000003897	Col1a1	collagen type I alpha 1 chain [Source:RGD Symbol;Acc:61817]	330.164	210.993	127.588	21.9343	20.0594	21.0288	10.6112	3.40752	up
GO:0030198	extracellular matrix organization	biological_process	6	2.05856e-11	ENSRNOG00000006778	Mmp19	matrix metallopeptidase 19 [Source:RGD Symbol;Acc:1311376]	22.3382	18.0888	17.5573	9.9295	8.98639	7.69105	2.17929	1.12386	up
GO:0030198	extracellular matrix organization	biological_process	6	2.05856e-11	ENSRNOG00000008246	Emilin1	elastin microfibril interfacer 1 [Source:RGD Symbol;Acc:1311209]	33.8479	31.5242	28.4099	12.5544	13.2388	13.7678	2.37056	1.24523	up
GO:0030198	extracellular matrix organization	biological_process	6	2.05856e-11	ENSRNOG00000008336	Tnfrsf11b	TNF receptor superfamily member 11B [Source:RGD Symbol;Acc:619802]	15.8317	17.9665	17.8888	5.69922	5.57279	7.20068	2.79802	1.48441	up
GO:0030198	extracellular matrix organization	biological_process	6	2.05856e-11	ENSRNOG00000010947	Mmp14	matrix metallopeptidase 14 [Source:RGD Symbol;Acc:620198]	73.5681	51.0079	51.6732	22.5951	16.4562	16.8319	3.15389	1.65713	up
GO:0030198	extracellular matrix organization	biological_process	6	2.05856e-11	ENSRNOG00000012058	Egflam	EGF-like, fibronectin type III and laminin G domains [Source:RGD Symbol;Acc:1306592]	5.80616	6.93893	4.79697	2.05351	2.02171	3.25163	2.39421	1.25955	up
GO:0030198	extracellular matrix organization	biological_process	6	2.05856e-11	ENSRNOG00000012216	Tgfbi	transforming growth factor, beta induced [Source:RGD Symbol;Acc:620017]	41.0144	25.3631	33.6917	15.6014	15.5471	14.7259	2.18138	1.12524	up
GO:0030198	extracellular matrix organization	biological_process	6	2.05856e-11	ENSRNOG00000012280	Ptx3	pentraxin 3 [Source:RGD Symbol;Acc:1593476]	8.43453	3.34676	14.9743	0.836776	0.630793	0.793102	11.8352	3.56502	up
GO:0030198	extracellular matrix organization	biological_process	6	2.05856e-11	ENSRNOG00000012660	Postn	periostin [Source:RGD Symbol;Acc:1305285]	317.385	321.176	267.696	117.573	99.7376	147.058	2.4872	1.31452	up
GO:0030198	extracellular matrix organization	biological_process	6	2.05856e-11	ENSRNOG00000016281	Col4a1	collagen type IV alpha 1 chain [Source:RGD Symbol;Acc:1307148]	228.604	293.978	253.367	78.1782	93.3833	113.433	2.72268	1.44503	up
GO:0030198	extracellular matrix organization	biological_process	6	2.05856e-11	ENSRNOG00000017477	Mmp23	matrix metallopeptidase 23 [Source:RGD Symbol;Acc:620201]	9.53142	7.20412	8.46643	1.49011	1.53306	2.22156	4.8052	2.2646	up
GO:0030198	extracellular matrix organization	biological_process	6	2.05856e-11	ENSRNOG00000017539	Mmp9	matrix metallopeptidase 9 [Source:RGD Symbol;Acc:621320]	0.708985	0.326444	0.167858	0.688657	1.06294	1.59762	0.359274	-1.47684	down
GO:0030198	extracellular matrix organization	biological_process	6	2.05856e-11	ENSRNOG00000018338	Vwa1	von Willebrand factor A domain containing 1 [Source:RGD Symbol;Acc:1311476]	11.376	7.54389	11.959	4.97604	3.71716	4.68247	2.30858	1.20701	up
GO:0030198	extracellular matrix organization	biological_process	6	2.05856e-11	ENSRNOG00000020525	Col5a3	collagen type V alpha 3 chain [Source:RGD Symbol;Acc:70922]	6.27947	4.20125	3.33351	1.45791	1.15799	1.30957	3.51913	1.81522	up
GO:0030198	extracellular matrix organization	biological_process	6	2.05856e-11	ENSRNOG00000023148	Col11a1	collagen type XI alpha 1 chain [Source:RGD Symbol;Acc:2372]	2.43824	0.601978	0.83106	0.137976	0.134476	0.179405	8.56748	3.09887	up
GO:0030198	extracellular matrix organization	biological_process	6	2.05856e-11	ENSRNOG00000023643	Mmp17	matrix metallopeptidase 17 [Source:RGD Symbol;Acc:1311541]	4.44504	5.58279	4.56778	1.30238	1.1677	2.24148	3.09783	1.63126	up
GO:0030198	extracellular matrix organization	biological_process	6	2.05856e-11	ENSRNOG00000023972	Col4a2	collagen type IV alpha 2 chain [Source:RGD Symbol;Acc:1308085]	134.643	170.785	148.447	55.5573	64.3337	79.1798	2.27997	1.18901	up
GO:0030198	extracellular matrix organization	biological_process	6	2.05856e-11	ENSRNOG00000031475	Col16a1	collagen type XVI alpha 1 chain [Source:RGD Symbol;Acc:1310982]	57.2427	51.0177	56.7959	19.2783	19.235	17.3131	2.9566	1.56394	up
GO:0030198	extracellular matrix organization	biological_process	6	2.05856e-11	ENSRNOG00000039668	Col8a1	collagen type VIII alpha 1 chain [Source:RGD Symbol;Acc:1309361]	7.63818	9.19059	8.64372	1.20062	1.48089	1.47494	6.12843	2.61552	up
GO:0030198	extracellular matrix organization	biological_process	6	2.05856e-11	ENSRNOG00000050539	Fbln5	fibulin 5 [Source:RGD Symbol;Acc:2594]	75.8039	91.3075	58.3569	25.7062	25.9353	36.1296	2.56882	1.36111	up
GO:0030198	extracellular matrix organization	biological_process	6	2.05856e-11	ENSRNOG00000060381	Col15a1	collagen type XV alpha 1 chain [Source:RGD Symbol;Acc:1310820]	21.3702	31.2652	30.8648	2.72355	3.70059	6.38776	6.51739	2.70429	up
GO:0005125	cytokine activity	molecular_function	7	1.41257e-10	ENSRNOG00000000239	Ccl7	C-C motif chemokine ligand 7 [Source:RGD Symbol;Acc:1359152]	14.4232	11.1589	18.1968	0.946133	0.831492	2.17106	11.087	3.47079	up
GO:0005125	cytokine activity	molecular_function	7	1.41257e-10	ENSRNOG00000002418	Tgfb2	transforming growth factor, beta 2 [Source:RGD Symbol;Acc:70491]	32.2616	34.4352	34.8496	12.3645	10.9716	12.4504	2.83756	1.50465	up
GO:0005125	cytokine activity	molecular_function	7	1.41257e-10	ENSRNOG00000002754	Areg	amphiregulin [Source:RGD Symbol;Acc:2149]	15.0098	32.3225	41.5271	12.678	12.7718	5.23223	2.89613	1.53413	up
GO:0005125	cytokine activity	molecular_function	7	1.41257e-10	ENSRNOG00000002978	Faslg	Fas ligand [Source:RGD Symbol;Acc:3880]	0.816894	1.01133	0.807977	3.43662	5.79528	3.71874	0.203558	-2.29649	down
GO:0005125	cytokine activity	molecular_function	7	1.41257e-10	ENSRNOG00000002984	Bmp15	bone morphogenetic protein 15 [Source:RGD Symbol;Acc:70990]	0.45701	0.765327	0.542995	2.39819	2.9696	2.67733	0.219429	-2.18817	down
GO:0005125	cytokine activity	molecular_function	7	1.41257e-10	ENSRNOG00000004470	Il24	interleukin 24 [Source:RGD Symbol;Acc:621484]	4.71744	2.76935	8.35128	0.381472	0.213099	0.210391	19.6755	4.29833	up
GO:0005125	cytokine activity	molecular_function	7	1.41257e-10	ENSRNOG00000007002	Lif	LIF, interleukin 6 family cytokine [Source:RGD Symbol;Acc:620865]	2.79472	2.7336	5.46239	0.419517	0.645634	0.611047	6.55692	2.71302	up
GO:0005125	cytokine activity	molecular_function	7	1.41257e-10	ENSRNOG00000007159	Ccl2	C-C motif chemokine ligand 2 [Source:RGD Symbol;Acc:3645]	37.7066	18.9936	41.8423	1.20024	1.4775	2.90705	17.6448	4.14117	up
GO:0005125	cytokine activity	molecular_function	7	1.41257e-10	ENSRNOG00000007335	Ccl11	C-C motif chemokine ligand 11 [Source:RGD Symbol;Acc:3644]	3.34409	1.3286	2.39904	6.15745	3.9376	18.2383	0.249591	-2.00236	down
GO:0005125	cytokine activity	molecular_function	7	1.41257e-10	ENSRNOG00000007468	Ifng	interferon gamma [Source:RGD Symbol;Acc:2866]	0	0	0	0.111509	0.315579	0.259981	0.000436637	-11.1613	down
GO:0005125	cytokine activity	molecular_function	7	1.41257e-10	ENSRNOG00000007810	Gdf6	growth differentiation factor 6 [Source:RGD Symbol;Acc:620104]	0.222642	0.323762	0.898277	0.028828	0.075581	0.015319	12.0664	3.59292	up
GO:0005125	cytokine activity	molecular_function	7	1.41257e-10	ENSRNOG00000008336	Tnfrsf11b	TNF receptor superfamily member 11B [Source:RGD Symbol;Acc:619802]	15.8317	17.9665	17.8888	5.69922	5.57279	7.20068	2.79802	1.48441	up
GO:0005125	cytokine activity	molecular_function	7	1.41257e-10	ENSRNOG00000009867	Tgfb3	transforming growth factor, beta 3 [Source:RGD Symbol;Acc:3851]	28.04	20.6768	22.6266	8.0599	7.08636	6.45932	3.30208	1.72338	up
GO:0005125	cytokine activity	molecular_function	7	1.41257e-10	ENSRNOG00000010208	Timp1	TIMP metallopeptidase inhibitor 1 [Source:RGD Symbol;Acc:621675]	191.725	124.836	377.443	39.0496	29.0957	32.338	6.90666	2.78799	up
GO:0005125	cytokine activity	molecular_function	7	1.41257e-10	ENSRNOG00000010278	Il6	interleukin 6 [Source:RGD Symbol;Acc:2901]	3.16485	2.11915	11.0231	0.116354	0.115796	0.224046	35.7458	5.1597	up
GO:0005125	cytokine activity	molecular_function	7	1.41257e-10	ENSRNOG00000010906	Ccl5	C-C motif chemokine ligand 5 [Source:RGD Symbol;Acc:69069]	33.6073	45.533	17.0812	161.621	269.977	147.801	0.166071	-2.59013	down
GO:0005125	cytokine activity	molecular_function	7	1.41257e-10	ENSRNOG00000014320	Inhba	inhibin subunit beta A [Source:RGD Symbol;Acc:62074]	1.43305	0.871656	0.743097	0.170937	0.044034	0.019916	12.9756	3.69773	up
GO:0005125	cytokine activity	molecular_function	7	1.41257e-10	ENSRNOG00000015055	Scg2	secretogranin II [Source:RGD Symbol;Acc:3626]	0.035057	0.056805	0.033008	0.176457	0.151106	0.287455	0.203035	-2.3002	down
GO:0005125	cytokine activity	molecular_function	7	1.41257e-10	ENSRNOG00000015618	Wnt5a	Wnt family member 5A [Source:RGD Symbol;Acc:69250]	7.40085	6.90616	6.99221	3.0348	2.5955	2.2052	2.7183	1.4427	up
GO:0005125	cytokine activity	molecular_function	7	1.41257e-10	ENSRNOG00000015992	Ccl20	C-C motif chemokine ligand 20 [Source:RGD Symbol;Acc:3646]	3.55187	1.52624	2.52854	0.934769	1.07933	0.51172	3.01156	1.59051	up
GO:0005125	cytokine activity	molecular_function	7	1.41257e-10	ENSRNOG00000016278	Ccl17	C-C motif chemokine ligand 17 [Source:RGD Symbol;Acc:619924]	3.89019	6.53501	5.24364	1.31455	3.29401	1.16464	2.71406	1.44045	up
GO:0005125	cytokine activity	molecular_function	7	1.41257e-10	ENSRNOG00000016535	Ccl22	C-C motif chemokine ligand 22 [Source:RGD Symbol;Acc:619933]	0.579045	2.03706	1.27757	0.082517	0.590059	0.297163	4.01517	2.00546	up
GO:0005125	cytokine activity	molecular_function	7	1.41257e-10	ENSRNOG00000019695	Il17b	interleukin 17B [Source:RGD Symbol;Acc:620614]	1.02491	1.03218	0.807308	0.063734	0.31913	0.242836	4.57791	2.19469	up
GO:0005125	cytokine activity	molecular_function	7	1.41257e-10	ENSRNOG00000020030	Crlf1	cytokine receptor-like factor 1 [Source:RGD Symbol;Acc:1311371]	61.323	55.0079	52.8657	24.5653	29.9984	21.4165	2.22685	1.15501	up
GO:0005125	cytokine activity	molecular_function	7	1.41257e-10	ENSRNOG00000021294	Mstn	myostatin [Source:RGD Symbol;Acc:3115]	0.239236	0.420771	0.61312	0	0	0	4243.76	12.0511	up
GO:0005125	cytokine activity	molecular_function	7	1.41257e-10	ENSRNOG00000021851	Ccl1	C-C motif chemokine ligand 1 [Source:RGD Symbol;Acc:1586495]	1.29096	0.891293	0.828182	0.159979	0	0	18.8177	4.23402	up
GO:0005125	cytokine activity	molecular_function	7	1.41257e-10	ENSRNOG00000022298	Cxcl11	C-X-C motif chemokine ligand 11 [Source:RGD Symbol;Acc:727827]	0.612395	0.600572	0.531235	0.05833	0.123484	0.076764	6.74536	2.7539	up
GO:0005125	cytokine activity	molecular_function	7	1.41257e-10	ENSRNOG00000026053	Grem1	gremlin 1, DAN family BMP antagonist [Source:RGD Symbol;Acc:2359]	3.7397	1.86409	4.41153	0.100842	0.313149	0.14419	17.9428	4.16533	up
GO:0005125	cytokine activity	molecular_function	7	1.41257e-10	ENSRNOG00000029768	Ccl12	chemokine (C-C motif) ligand 12 [Source:RGD Symbol;Acc:1309255]	6.0007	2.47451	2.57848	0	0.075135	0.603588	16.286	4.02556	up
GO:0005125	cytokine activity	molecular_function	7	1.41257e-10	ENSRNOG00000030155	Bmp8a	bone morphogenetic protein 8a [Source:RGD Symbol;Acc:1585858]	0.24594	0.142431	0.13281	0.675516	0.572486	0.397535	0.316724	-1.6587	down
GO:0005125	cytokine activity	molecular_function	7	1.41257e-10	ENSRNOG00000033209	Bmp8b	bone morphogenetic protein 8b [Source:RGD Symbol;Acc:1591873]	0.366519	0.45209	0.546395	1.03207	1.66145	1.31074	0.340888	-1.55263	down
GO:0005125	cytokine activity	molecular_function	7	1.41257e-10	ENSRNOG00000036672	Sectm1a	secreted and transmembrane 1A [Source:RGD Symbol;Acc:1305973]	0.810496	1.13994	0.922628	0.330433	0.082502	0.313546	3.95477	1.98359	up
GO:0005125	cytokine activity	molecular_function	7	1.41257e-10	ENSRNOG00000043342	LOC290595	hypothetical gene supported by AF152002 [Source:RGD Symbol;Acc:1566160]	0.495846	0.709836	0	0.873931	12.6402	1.47192	0.0804534	-3.6357	down
GO:0005125	cytokine activity	molecular_function	7	1.41257e-10	ENSRNOG00000043451	Spp1	secreted phosphoprotein 1 [Source:RGD Symbol;Acc:3752]	129.555	106.043	88.3967	9.8296	1.21233	1.83191	25.1669	4.65346	up
GO:0005125	cytokine activity	molecular_function	7	1.41257e-10	ENSRNOG00000045595	Tnfsf9	TNF superfamily member 9 [Source:RGD Symbol;Acc:727974]	2.88929	3.86285	2.14834	0.097061	0.890483	0.252154	7.17956	2.84389	up
GO:0005125	cytokine activity	molecular_function	7	1.41257e-10	ENSRNOG00000058856	Tslp	thymic stromal lymphopoietin [Source:RGD Symbol;Acc:1586479]	4.0925	4.31334	5.15534	2.10864	0.980242	2.14351	2.59177	1.37394	up
GO:0005125	cytokine activity	molecular_function	7	1.41257e-10	ENSRNOG00000062030	Cers1	ceramide synthase 1 [Source:RGD Symbol;Acc:1305974]	0.441764	1.11004	0.488073	1.21572	1.53219	1.3981	0.49201	-1.02324	down
GO:0030246	carbohydrate binding	molecular_function	4	2.70129e-10	ENSRNOG00000002723	Sele	selectin E [Source:RGD Symbol;Acc:3654]	2.98187	1.19921	3.6168	0.289072	0.400788	0.3301	7.64528	2.93457	up
GO:0030246	carbohydrate binding	molecular_function	4	2.70129e-10	ENSRNOG00000004438	Cntn1	contactin 1 [Source:RGD Symbol;Acc:621300]	0.603188	1.23802	0.584036	2.03437	2.22048	2.31847	0.368953	-1.43849	down
GO:0030246	carbohydrate binding	molecular_function	4	2.70129e-10	ENSRNOG00000004540	Clec3b	C-type lectin domain family 3, member B [Source:RGD Symbol;Acc:1311031]	120.517	107.673	87.2039	42.8811	43.4075	48.0254	2.34818	1.23154	up
GO:0030246	carbohydrate binding	molecular_function	4	2.70129e-10	ENSRNOG00000004589	Galnt16	polypeptide N-acetylgalactosaminyltransferase 16 [Source:RGD Symbol;Acc:1310202]	1.39865	0.833933	0.976815	0.729452	0.391388	0.453318	2.0388	1.02772	up
GO:0030246	carbohydrate binding	molecular_function	4	2.70129e-10	ENSRNOG00000006151	Reg3b	regenerating family member 3 beta [Source:RGD Symbol;Acc:3254]	6.90006	0.569677	5.24778	0	0	0	42391.7	15.3715	up
GO:0030246	carbohydrate binding	molecular_function	4	2.70129e-10	ENSRNOG00000006360	Reg3a	regenerating islet-derived 3 alpha [Source:RGD Symbol;Acc:621401]	0.963593	0.111877	0.946901	0	0	0	6741.24	12.7188	up
GO:0030246	carbohydrate binding	molecular_function	4	2.70129e-10	ENSRNOG00000006579	Reg3g	regenerating family member 3 gamma [Source:RGD Symbol;Acc:3256]	3.69088	0.080361	3.74511	0	0	0	25054.5	14.6128	up
GO:0030246	carbohydrate binding	molecular_function	4	2.70129e-10	ENSRNOG00000006814	Klrg2	killer cell lectin like receptor G2 [Source:RGD Symbol;Acc:1587495]	1.22444	1.79225	0.647392	2.22165	3.05842	2.33879	0.480923	-1.05612	down
GO:0030246	carbohydrate binding	molecular_function	4	2.70129e-10	ENSRNOG00000007310	Klrb1b	killer cell lectin-like receptor subfamily B, member 1A [Source:RGD Symbol;Acc:1586149]	2.14455	2.25501	1.53234	5.65662	8.09993	5.18838	0.313113	-1.67524	down
GO:0030246	carbohydrate binding	molecular_function	4	2.70129e-10	ENSRNOG00000007811	Klrb1c	killer cell lectin-like receptor subfamily B member 1C [Source:RGD Symbol;Acc:1583336]	0.990474	1.01553	0.280973	3.16444	5.81491	2.6562	0.196551	-2.34703	down
GO:0030246	carbohydrate binding	molecular_function	4	2.70129e-10	ENSRNOG00000007951	Galnt14	polypeptide N-acetylgalactosaminyltransferase 14 [Source:RGD Symbol;Acc:1310068]	0.090449	0.144045	0.187898	1.22288	1.53036	1.57812	0.0975195	-3.35817	down
GO:0030246	carbohydrate binding	molecular_function	4	2.70129e-10	ENSRNOG00000008591	Colec10	collectin subfamily member 10 [Source:RGD Symbol;Acc:1307149]	0.208513	0.315592	0.391624	0.065495	0.078789	0.079641	4.08945	2.03191	up
GO:0030246	carbohydrate binding	molecular_function	4	2.70129e-10	ENSRNOG00000009884	Lgals1	galectin 1 [Source:RGD Symbol;Acc:69355]	435.47	271.097	396.875	222.629	158.549	127.526	2.16912	1.11711	up
GO:0030246	carbohydrate binding	molecular_function	4	2.70129e-10	ENSRNOG00000010045	Clec4a	C-type lectin domain family 4, member A [Source:RGD Symbol;Acc:1359662]	2.66094	2.13175	1.39653	0.619083	0.217572	0.456681	4.78547	2.25866	up
GO:0030246	carbohydrate binding	molecular_function	4	2.70129e-10	ENSRNOG00000010057	Clec4n	C-type lectin domain family 4, member n [Source:MGI Symbol;Acc:MGI:1861231]	0	1.03321	0.413927	0	0	0	4823.8	12.236	up
GO:0030246	carbohydrate binding	molecular_function	4	2.70129e-10	ENSRNOG00000011706	Mbl1	mannose-binding lectin (protein A) 1 [Source:RGD Symbol;Acc:3055]	2.56921	3.06382	2.73128	0.495776	1.10101	0.920711	3.32248	1.73226	up
GO:0030246	carbohydrate binding	molecular_function	4	2.70129e-10	ENSRNOG00000014918	Klrg1	killer cell lectin like receptor G1 [Source:RGD Symbol;Acc:61978]	0.515422	1.04205	0.307714	4.26076	7.30657	3.73	0.121929	-3.03589	down
GO:0030246	carbohydrate binding	molecular_function	4	2.70129e-10	ENSRNOG00000018715	Clec10a	C-type lectin domain containing 10A [Source:RGD Symbol;Acc:621158]	33.0976	29.2512	34.7233	11.6423	13.2868	14.9001	2.43721	1.28523	up
GO:0030246	carbohydrate binding	molecular_function	4	2.70129e-10	ENSRNOG00000019138	Clec11a	C-type lectin domain containing 11A [Source:RGD Symbol;Acc:3627]	2.21488	1.61767	1.58088	0.299434	0.084132	0.026429	13.2036	3.72286	up
GO:0030246	carbohydrate binding	molecular_function	4	2.70129e-10	ENSRNOG00000019718	Galnt15	polypeptide N-acetylgalactosaminyltransferase 15 [Source:MGI Symbol;Acc:MGI:1926004]	2.06938	2.30788	0.814215	4.52076	3.49921	5.05571	0.397033	-1.33267	down
GO:0030246	carbohydrate binding	molecular_function	4	2.70129e-10	ENSRNOG00000022910	Emcn	endomucin [Source:RGD Symbol;Acc:1303218]	87.7466	99.2771	101.343	37.7553	30.9035	51.7679	2.39454	1.25975	up
GO:0030246	carbohydrate binding	molecular_function	4	2.70129e-10	ENSRNOG00000029911	Cilp	cartilage intermediate layer protein [Source:RGD Symbol;Acc:1305124]	4.14124	1.91428	1.13979	0.819222	0.954336	1.27989	2.35646	1.23662	up
GO:0030246	carbohydrate binding	molecular_function	4	2.70129e-10	ENSRNOG00000030726	Asgr2	asialoglycoprotein receptor 2 [Source:RGD Symbol;Acc:2161]	2.34361	1.80753	2.56313	1.11066	0.695973	0.645904	2.73769	1.45296	up
GO:0030246	carbohydrate binding	molecular_function	4	2.70129e-10	ENSRNOG00000037076	LOC689757	similar to osteoclast inhibitory lectin [Source:RGD Symbol;Acc:1588731]	1.48897	0.842691	1.01231	0.263808	0.421097	0.30862	3.36576	1.75093	up
GO:0030246	carbohydrate binding	molecular_function	4	2.70129e-10	ENSRNOG00000042795	RGD1564571	similar to DC-SIGN [Source:RGD Symbol;Acc:1564571]	0.800357	0.066523	0.06648	0	0.040751	0	22.904	4.51753	up
GO:0030246	carbohydrate binding	molecular_function	4	2.70129e-10	ENSRNOG00000046921	AABR07034986		0.241536	0.216421	0.266447	0	0	0	2414.68	11.2376	up
GO:0030246	carbohydrate binding	molecular_function	4	2.70129e-10	ENSRNOG00000048874	Gckr	glucokinase regulator [Source:RGD Symbol;Acc:2671]	5.25045	5.47186	8.78185	18.5174	23.256	15.7747	0.338919	-1.56099	down
GO:0030246	carbohydrate binding	molecular_function	4	2.70129e-10	ENSRNOG00000048882	AABR07034992		2.01124	0.32813	1.06372	0	0	0	11343.6	13.4696	up
GO:0030246	carbohydrate binding	molecular_function	4	2.70129e-10	ENSRNOG00000051600	Ly49i4	Ly49 inhibitory receptor 4 [Source:RGD Symbol;Acc:1549758]	0.123131	0.192681	0.151423	0.63135	0.500495	0.31247	0.323499	-1.62817	down
GO:0030246	carbohydrate binding	molecular_function	4	2.70129e-10	ENSRNOG00000051661	Ly49s5	Ly49 stimulatory receptor 5 [Source:RGD Symbol;Acc:1359728]	0.0988526	0.139451	0	0.309726	0.512692	0.393206	0.196034	-2.35082	down
GO:0030246	carbohydrate binding	molecular_function	4	2.70129e-10	ENSRNOG00000052467	Klrc2	killer cell lectin like receptor C3 [Source:RGD Symbol;Acc:1560637]	1.9898	1.77201	1.36324	3.11778	4.56144	2.74888	0.491465	-1.02484	down
GO:0030246	carbohydrate binding	molecular_function	4	2.70129e-10	ENSRNOG00000052803	Klri1	killer cell lectin-like receptor family I member 1 [Source:RGD Symbol;Acc:1359344]	2.51079	2.55695	2.17497	5.88026	9.28276	5.60948	0.348668	-1.52007	down
GO:0030246	carbohydrate binding	molecular_function	4	2.70129e-10	ENSRNOG00000053272	Chi3l1	chitinase 3 like 1 [Source:RGD Symbol;Acc:620874]	187.923	110.593	195.544	69.2241	52.2938	54.6498	2.80449	1.48774	up
GO:0030246	carbohydrate binding	molecular_function	4	2.70129e-10	ENSRNOG00000053337	Ly49s6	Ly49 stimulatory receptor 6 [Source:RGD Symbol;Acc:1549735]	0.0945918	0.284466	0.107047	1.2185	2.01147	0.714166	0.123247	-3.02037	down
GO:0030246	carbohydrate binding	molecular_function	4	2.70129e-10	ENSRNOG00000055196	Klrc1	killer cell lectin like receptor C1 [Source:RGD Symbol;Acc:2976]	0.534039	0.553248	0.120291	1.52792	2.10416	2.30476	0.203404	-2.29758	down
GO:0030246	carbohydrate binding	molecular_function	4	2.70129e-10	ENSRNOG00000056783	Cd69	Cd69 molecule [Source:RGD Symbol;Acc:61318]	2.37731	3.96908	1.98914	8.9826	9.16437	7.94289	0.319493	-1.64614	down
GO:0030246	carbohydrate binding	molecular_function	4	2.70129e-10	ENSRNOG00000057335	Clec1b	C-type lectin domain family 1, member B [Source:RGD Symbol;Acc:1563517]	1.23036	1.6205	1.39801	4.29649	3.19762	4.56591	0.352311	-1.50508	down
GO:0030246	carbohydrate binding	molecular_function	4	2.70129e-10	ENSRNOG00000057643	Klri2	killer cell lectin-like receptor family I member 2 [Source:RGD Symbol;Acc:1359205]	0.465239	0.743852	0.242443	4.15407	4.85632	2.9182	0.121685	-3.03877	down
GO:0030246	carbohydrate binding	molecular_function	4	2.70129e-10	ENSRNOG00000058714	Klre1	killer cell lectin-like receptor, family E, member 1 [Source:RGD Symbol;Acc:727903]	1.4797	1.69774	0.803759	8.47476	11.0421	6.07694	0.155553	-2.68452	down
GO:0030246	carbohydrate binding	molecular_function	4	2.70129e-10	ENSRNOG00000060246	Klrd1	killer cell lectin like receptor D1 [Source:RGD Symbol;Acc:2978]	2.84075	4.20682	1.49137	13.655	21.5233	11.2525	0.183907	-2.44296	down
GO:0030246	carbohydrate binding	molecular_function	4	2.70129e-10	ENSRNOG00000061739	Klrk1	killer cell lectin like receptor K1 [Source:RGD Symbol;Acc:3180]	6.32432	4.17684	4.30792	9.34371	16.153	12.7948	0.386746	-1.37054	down
GO:0005604	basement membrane	cellular_component	6	6.84943e-10	ENSRNOG00000000341	Nid2	nidogen 2 [Source:RGD Symbol;Acc:1311685]	5.85374	5.92398	4.96026	2.31282	2.30347	2.63372	2.30869	1.20707	up
GO:0005604	basement membrane	cellular_component	6	6.84943e-10	ENSRNOG00000002052	Ccdc80	coiled-coil domain containing 80 [Source:RGD Symbol;Acc:69421]	75.5538	48.2748	95.7677	28.6002	19.8306	18.9171	3.26063	1.70515	up
GO:0005604	basement membrane	cellular_component	6	6.84943e-10	ENSRNOG00000002418	Tgfb2	transforming growth factor, beta 2 [Source:RGD Symbol;Acc:70491]	32.2616	34.4352	34.8496	12.3645	10.9716	12.4504	2.83756	1.50465	up
GO:0005604	basement membrane	cellular_component	6	6.84943e-10	ENSRNOG00000002461	Nid1	nidogen 1 [Source:RGD Symbol;Acc:3178]	27.7591	33.8089	25.3969	7.0868	7.3753	8.23495	3.83155	1.93793	up
GO:0005604	basement membrane	cellular_component	6	6.84943e-10	ENSRNOG00000003172	Serpinf1	serpin family F member 1 [Source:RGD Symbol;Acc:631369]	45.6714	23.7715	24.3167	5.34695	3.41355	6.33342	6.21175	2.635	up
GO:0005604	basement membrane	cellular_component	6	6.84943e-10	ENSRNOG00000003776	Amtn	amelotin [Source:RGD Symbol;Acc:1592356]	9.9121	8.17096	8.70068	2.53284	1.29441	2.48701	4.24178	2.08467	up
GO:0005604	basement membrane	cellular_component	6	6.84943e-10	ENSRNOG00000007302	Fbn1	fibrillin 1 [Source:RGD Symbol;Acc:620908]	30.0541	29.7677	24.9997	8.20277	8.09057	8.42094	3.43208	1.77909	up
GO:0005604	basement membrane	cellular_component	6	6.84943e-10	ENSRNOG00000008680	Loxl1	lysyl oxidase-like 1 [Source:RGD Symbol;Acc:1308752]	63.4442	58.285	47.428	14.3395	11.9453	14.514	4.14613	2.05176	up
GO:0005604	basement membrane	cellular_component	6	6.84943e-10	ENSRNOG00000008749	Col5a1	collagen type V alpha 1 chain [Source:RGD Symbol;Acc:70920]	26.8905	21.3001	17.3892	7.63965	8.60063	7.95309	2.71065	1.43864	up
GO:0005604	basement membrane	cellular_component	6	6.84943e-10	ENSRNOG00000010208	Timp1	TIMP metallopeptidase inhibitor 1 [Source:RGD Symbol;Acc:621675]	191.725	124.836	377.443	39.0496	29.0957	32.338	6.90666	2.78799	up
GO:0005604	basement membrane	cellular_component	6	6.84943e-10	ENSRNOG00000010529	Thbs2	thrombospondin 2 [Source:RGD Symbol;Acc:1310979]	16.9175	9.7328	15.9974	0.842375	0.59486	0.649489	20.4376	4.35316	up
GO:0005604	basement membrane	cellular_component	6	6.84943e-10	ENSRNOG00000011946	Ptn	pleiotrophin [Source:RGD Symbol;Acc:3444]	7.08411	4.9815	4.90333	1.78003	1.39043	2.30363	3.09986	1.63221	up
GO:0005604	basement membrane	cellular_component	6	6.84943e-10	ENSRNOG00000012058	Egflam	EGF-like, fibronectin type III and laminin G domains [Source:RGD Symbol;Acc:1306592]	5.80616	6.93893	4.79697	2.05351	2.02171	3.25163	2.39421	1.25955	up
GO:0005604	basement membrane	cellular_component	6	6.84943e-10	ENSRNOG00000012216	Tgfbi	transforming growth factor, beta induced [Source:RGD Symbol;Acc:620017]	41.0144	25.3631	33.6917	15.6014	15.5471	14.7259	2.18138	1.12524	up
GO:0005604	basement membrane	cellular_component	6	6.84943e-10	ENSRNOG00000012840	Sparc	secreted protein acidic and cysteine rich [Source:RGD Symbol;Acc:3742]	1859.4	1712.29	1518.68	726.387	694.718	834.72	2.25655	1.17412	up
GO:0005604	basement membrane	cellular_component	6	6.84943e-10	ENSRNOG00000014288	Fn1	fibronectin 1 [Source:RGD Symbol;Acc:2624]	280.945	248.379	229.735	57.4707	64.5711	77.3481	3.80691	1.92862	up
GO:0005604	basement membrane	cellular_component	6	6.84943e-10	ENSRNOG00000016281	Col4a1	collagen type IV alpha 1 chain [Source:RGD Symbol;Acc:1307148]	228.604	293.978	253.367	78.1782	93.3833	113.433	2.72268	1.44503	up
GO:0005604	basement membrane	cellular_component	6	6.84943e-10	ENSRNOG00000017237	Lama1	laminin subunit alpha 1 [Source:RGD Symbol;Acc:1307207]	0.012656	0.0023	0.040977	0	0	0	186.443	7.54259	up
GO:0005604	basement membrane	cellular_component	6	6.84943e-10	ENSRNOG00000018338	Vwa1	von Willebrand factor A domain containing 1 [Source:RGD Symbol;Acc:1311476]	11.376	7.54389	11.959	4.97604	3.71716	4.68247	2.30858	1.20701	up
GO:0005604	basement membrane	cellular_component	6	6.84943e-10	ENSRNOG00000022309	Frem1	Fras1 related extracellular matrix 1 [Source:RGD Symbol;Acc:1306981]	1.56745	1.82675	0.915623	0.410153	0.33414	0.309213	4.09093	2.03243	up
GO:0005604	basement membrane	cellular_component	6	6.84943e-10	ENSRNOG00000023972	Col4a2	collagen type IV alpha 2 chain [Source:RGD Symbol;Acc:1308085]	134.643	170.785	148.447	55.5573	64.3337	79.1798	2.27997	1.18901	up
GO:0005604	basement membrane	cellular_component	6	6.84943e-10	ENSRNOG00000039197	LOC108348074	collagen alpha-1(XV) chain-like [Source:RGD Symbol;Acc:11464459]	12.5283	18.8748	22.1478	2.9943	2.28433	4.771	5.32864	2.41377	up
GO:0005604	basement membrane	cellular_component	6	6.84943e-10	ENSRNOG00000058645	Tnc	tenascin C [Source:RGD Symbol;Acc:621057]	32.8819	24.6221	38.6851	6.23045	5.06284	5.64608	5.67843	2.50549	up
GO:0005604	basement membrane	cellular_component	6	6.84943e-10	ENSRNOG00000059507	Lamc3	laminin subunit gamma 3 [Source:RGD Symbol;Acc:1309399]	0.642198	0.669721	0.48091	1.12057	1.16744	1.51648	0.47124	-1.08547	down
GO:0005604	basement membrane	cellular_component	6	6.84943e-10	ENSRNOG00000060381	Col15a1	collagen type XV alpha 1 chain [Source:RGD Symbol;Acc:1310820]	21.3702	31.2652	30.8648	2.72355	3.70059	6.38776	6.51739	2.70429	up
GO:0071356	cellular response to tumor necrosis factor	biological_process	8	7.41678e-10	ENSRNOG00000000239	Ccl7	C-C motif chemokine ligand 7 [Source:RGD Symbol;Acc:1359152]	14.4232	11.1589	18.1968	0.946133	0.831492	2.17106	11.087	3.47079	up
GO:0071356	cellular response to tumor necrosis factor	biological_process	8	7.41678e-10	ENSRNOG00000001926	Cldn1	claudin 1 [Source:RGD Symbol;Acc:68422]	0.854451	0.532531	0.439747	1.26286	1.16606	2.36597	0.380974	-1.39223	down
GO:0071356	cellular response to tumor necrosis factor	biological_process	8	7.41678e-10	ENSRNOG00000003897	Col1a1	collagen type I alpha 1 chain [Source:RGD Symbol;Acc:61817]	330.164	210.993	127.588	21.9343	20.0594	21.0288	10.6112	3.40752	up
GO:0071356	cellular response to tumor necrosis factor	biological_process	8	7.41678e-10	ENSRNOG00000004473	Ppargc1a	PPARG coactivator 1 alpha [Source:RGD Symbol;Acc:620925]	0.699099	0.733841	0.380414	1.49528	2.21646	2.7585	0.280261	-1.83516	down
GO:0071356	cellular response to tumor necrosis factor	biological_process	8	7.41678e-10	ENSRNOG00000004854	Has2	hyaluronan synthase 2 [Source:RGD Symbol;Acc:2781]	0.632455	0.404069	0.485014	0.097024	0.031942	0.012871	10.7274	3.42322	up
GO:0071356	cellular response to tumor necrosis factor	biological_process	8	7.41678e-10	ENSRNOG00000007159	Ccl2	C-C motif chemokine ligand 2 [Source:RGD Symbol;Acc:3645]	37.7066	18.9936	41.8423	1.20024	1.4775	2.90705	17.6448	4.14117	up
GO:0071356	cellular response to tumor necrosis factor	biological_process	8	7.41678e-10	ENSRNOG00000007335	Ccl11	C-C motif chemokine ligand 11 [Source:RGD Symbol;Acc:3644]	3.34409	1.3286	2.39904	6.15745	3.9376	18.2383	0.249591	-2.00236	down
GO:0071356	cellular response to tumor necrosis factor	biological_process	8	7.41678e-10	ENSRNOG00000009329	Nr1d1	nuclear receptor subfamily 1, group D, member 1 [Source:RGD Symbol;Acc:628827]	13.6014	12.8632	4.00937	37.3731	44.8594	63.3978	0.209256	-2.25666	down
GO:0071356	cellular response to tumor necrosis factor	biological_process	8	7.41678e-10	ENSRNOG00000010278	Il6	interleukin 6 [Source:RGD Symbol;Acc:2901]	3.16485	2.11915	11.0231	0.116354	0.115796	0.224046	35.7458	5.1597	up
GO:0071356	cellular response to tumor necrosis factor	biological_process	8	7.41678e-10	ENSRNOG00000010805	Fabp4	fatty acid binding protein 4 [Source:RGD Symbol;Acc:69309]	104.025	71.6099	73.0857	29.3057	12.6426	16.5079	4.25481	2.0891	up
GO:0071356	cellular response to tumor necrosis factor	biological_process	8	7.41678e-10	ENSRNOG00000010906	Ccl5	C-C motif chemokine ligand 5 [Source:RGD Symbol;Acc:69069]	33.6073	45.533	17.0812	161.621	269.977	147.801	0.166071	-2.59013	down
GO:0071356	cellular response to tumor necrosis factor	biological_process	8	7.41678e-10	ENSRNOG00000011130	Calca	calcitonin-related polypeptide alpha [Source:RGD Symbol;Acc:2254]	0.0864105	0.283044	0.149482	0.762545	1.17682	1.38808	0.155957	-2.68078	down
GO:0071356	cellular response to tumor necrosis factor	biological_process	8	7.41678e-10	ENSRNOG00000012660	Postn	periostin [Source:RGD Symbol;Acc:1305285]	317.385	321.176	267.696	117.573	99.7376	147.058	2.4872	1.31452	up
GO:0071356	cellular response to tumor necrosis factor	biological_process	8	7.41678e-10	ENSRNOG00000013973	Lcn2	lipocalin 2 [Source:RGD Symbol;Acc:69408]	1594.83	895.005	2315.86	265.381	192.039	198.689	7.32455	2.87274	up
GO:0071356	cellular response to tumor necrosis factor	biological_process	8	7.41678e-10	ENSRNOG00000014170	Dbn1	drebrin 1 [Source:RGD Symbol;Acc:70885]	12.274	13.1188	9.45685	3.15928	2.90481	3.53532	3.63039	1.86013	up
GO:0071356	cellular response to tumor necrosis factor	biological_process	8	7.41678e-10	ENSRNOG00000015858	Hyal1	hyaluronidase 1 [Source:RGD Symbol;Acc:1303060]	13.1911	9.38187	9.33985	18.5813	21.0105	34.4394	0.431072	-1.214	down
GO:0071356	cellular response to tumor necrosis factor	biological_process	8	7.41678e-10	ENSRNOG00000015992	Ccl20	C-C motif chemokine ligand 20 [Source:RGD Symbol;Acc:3646]	3.55187	1.52624	2.52854	0.934769	1.07933	0.51172	3.01156	1.59051	up
GO:0071356	cellular response to tumor necrosis factor	biological_process	8	7.41678e-10	ENSRNOG00000016278	Ccl17	C-C motif chemokine ligand 17 [Source:RGD Symbol;Acc:619924]	3.89019	6.53501	5.24364	1.31455	3.29401	1.16464	2.71406	1.44045	up
GO:0071356	cellular response to tumor necrosis factor	biological_process	8	7.41678e-10	ENSRNOG00000016535	Ccl22	C-C motif chemokine ligand 22 [Source:RGD Symbol;Acc:619933]	0.579045	2.03706	1.27757	0.082517	0.590059	0.297163	4.01517	2.00546	up
GO:0071356	cellular response to tumor necrosis factor	biological_process	8	7.41678e-10	ENSRNOG00000017226	Slc2a4	solute carrier family 2 member 4 [Source:RGD Symbol;Acc:2711]	1.77573	2.8625	1.51947	0.725115	0.747971	0.866538	2.63192	1.39612	up
GO:0071356	cellular response to tumor necrosis factor	biological_process	8	7.41678e-10	ENSRNOG00000018598	Ankrd1	ankyrin repeat domain 1 [Source:RGD Symbol;Acc:61989]	107.023	107.496	209.618	18.6489	16.2713	32.2265	6.31656	2.65914	up
GO:0071356	cellular response to tumor necrosis factor	biological_process	8	7.41678e-10	ENSRNOG00000018839	Ntrk2	neurotrophic receptor tyrosine kinase 2 [Source:RGD Symbol;Acc:3213]	2.74908	5.01041	5.1754	0.644865	1.09069	0.941283	4.83215	2.27267	up
GO:0071356	cellular response to tumor necrosis factor	biological_process	8	7.41678e-10	ENSRNOG00000018865	Adamts12	ADAM metallopeptidase with thrombospondin type 1 motif, 12 [Source:RGD Symbol;Acc:1307323]	4.73114	7.17003	4.91418	1.22778	1.39158	1.85944	3.75443	1.90859	up
GO:0071356	cellular response to tumor necrosis factor	biological_process	8	7.41678e-10	ENSRNOG00000020733	Camp	cathelicidin antimicrobial peptide [Source:RGD Symbol;Acc:1559878]	1.35987	0.998778	1.40631	2.74325	2.92398	3.19669	0.42475	-1.23531	down
GO:0071356	cellular response to tumor necrosis factor	biological_process	8	7.41678e-10	ENSRNOG00000021029	Hamp	hepcidin antimicrobial peptide [Source:RGD Symbol;Acc:70971]	0.685082	0.809251	0.93874	0.114888	0	0	21.1778	4.40448	up
GO:0071356	cellular response to tumor necrosis factor	biological_process	8	7.41678e-10	ENSRNOG00000021851	Ccl1	C-C motif chemokine ligand 1 [Source:RGD Symbol;Acc:1586495]	1.29096	0.891293	0.828182	0.159979	0	0	18.8177	4.23402	up
GO:0071356	cellular response to tumor necrosis factor	biological_process	8	7.41678e-10	ENSRNOG00000029768	Ccl12	chemokine (C-C motif) ligand 12 [Source:RGD Symbol;Acc:1309255]	6.0007	2.47451	2.57848	0	0.075135	0.603588	16.286	4.02556	up
GO:0071356	cellular response to tumor necrosis factor	biological_process	8	7.41678e-10	ENSRNOG00000031162	Ccl24	C-C motif chemokine ligand 24 [Source:RGD Symbol;Acc:1310245]	5.13001	4.48235	6.31795	1.67853	1.29167	1.65069	3.44746	1.78553	up
GO:0071356	cellular response to tumor necrosis factor	biological_process	8	7.41678e-10	ENSRNOG00000034290	Ccl21	C-C motif chemokine ligand 21 [Source:RGD Symbol;Acc:1311996]	171.913	158.057	123.877	70.7503	53.7025	41.4424	2.73575	1.45194	up
GO:0071356	cellular response to tumor necrosis factor	biological_process	8	7.41678e-10	ENSRNOG00000045829	Thbs1	thrombospondin 1 [Source:RGD Symbol;Acc:1588455]	69.4641	106.372	164.303	19.9347	19.858	26.7682	5.11019	2.35338	up
GO:0071356	cellular response to tumor necrosis factor	biological_process	8	7.41678e-10	ENSRNOG00000053272	Chi3l1	chitinase 3 like 1 [Source:RGD Symbol;Acc:620874]	187.923	110.593	195.544	69.2241	52.2938	54.6498	2.80449	1.48774	up
GO:0005201	extracellular matrix structural constituent	molecular_function	4	1.58647e-09	ENSRNOG00000000463	Col11a2	collagen type XI alpha 2 chain [Source:RGD Symbol;Acc:2373]	0.500326	1.10928	0.443421	1.4898	1.50536	1.91439	0.41817	-1.25784	down
GO:0005201	extracellular matrix structural constituent	molecular_function	4	1.58647e-09	ENSRNOG00000001249	Col6a1	collagen type VI alpha 1 chain [Source:RGD Symbol;Acc:1565398]	133.697	116.137	100.859	46.125	44.8447	58.8249	2.34116	1.22722	up
GO:0005201	extracellular matrix structural constituent	molecular_function	4	1.58647e-09	ENSRNOG00000001469	Eln	elastin [Source:RGD Symbol;Acc:67394]	1000.53	1074.75	759.619	73.1078	65.5134	68.0227	13.7187	3.77807	up
GO:0005201	extracellular matrix structural constituent	molecular_function	4	1.58647e-09	ENSRNOG00000003357	Col3a1	collagen type III alpha 1 chain [Source:RGD Symbol;Acc:71029]	773.166	628.281	469.974	156.474	148.568	159.465	4.02884	2.01036	up
GO:0005201	extracellular matrix structural constituent	molecular_function	4	1.58647e-09	ENSRNOG00000003736	Col5a2	collagen type V alpha 2 chain [Source:RGD Symbol;Acc:70921]	97.1307	91.8408	82.7718	37.0816	38.9407	47.369	2.20229	1.139	up
GO:0005201	extracellular matrix structural constituent	molecular_function	4	1.58647e-09	ENSRNOG00000003897	Col1a1	collagen type I alpha 1 chain [Source:RGD Symbol;Acc:61817]	330.164	210.993	127.588	21.9343	20.0594	21.0288	10.6112	3.40752	up
GO:0005201	extracellular matrix structural constituent	molecular_function	4	1.58647e-09	ENSRNOG00000007302	Fbn1	fibrillin 1 [Source:RGD Symbol;Acc:620908]	30.0541	29.7677	24.9997	8.20277	8.09057	8.42094	3.43208	1.77909	up
GO:0005201	extracellular matrix structural constituent	molecular_function	4	1.58647e-09	ENSRNOG00000008749	Col5a1	collagen type V alpha 1 chain [Source:RGD Symbol;Acc:70920]	26.8905	21.3001	17.3892	7.63965	8.60063	7.95309	2.71065	1.43864	up
GO:0005201	extracellular matrix structural constituent	molecular_function	4	1.58647e-09	ENSRNOG00000011292	NEWGENE_621351	collagen, type I, alpha 2 [Source:RGD Symbol;Acc:9452897]	262.119	200.003	149.732	39.3449	35.4719	44.7937	5.11539	2.35484	up
GO:0005201	extracellular matrix structural constituent	molecular_function	4	1.58647e-09	ENSRNOG00000016281	Col4a1	collagen type IV alpha 1 chain [Source:RGD Symbol;Acc:1307148]	228.604	293.978	253.367	78.1782	93.3833	113.433	2.72268	1.44503	up
GO:0005201	extracellular matrix structural constituent	molecular_function	4	1.58647e-09	ENSRNOG00000017237	Lama1	laminin subunit alpha 1 [Source:RGD Symbol;Acc:1307207]	0.012656	0.0023	0.040977	0	0	0	186.443	7.54259	up
GO:0005201	extracellular matrix structural constituent	molecular_function	4	1.58647e-09	ENSRNOG00000020525	Col5a3	collagen type V alpha 3 chain [Source:RGD Symbol;Acc:70922]	6.27947	4.20125	3.33351	1.45791	1.15799	1.30957	3.51913	1.81522	up
GO:0005201	extracellular matrix structural constituent	molecular_function	4	1.58647e-09	ENSRNOG00000023148	Col11a1	collagen type XI alpha 1 chain [Source:RGD Symbol;Acc:2372]	2.43824	0.601978	0.83106	0.137976	0.134476	0.179405	8.56748	3.09887	up
GO:0005201	extracellular matrix structural constituent	molecular_function	4	1.58647e-09	ENSRNOG00000023972	Col4a2	collagen type IV alpha 2 chain [Source:RGD Symbol;Acc:1308085]	134.643	170.785	148.447	55.5573	64.3337	79.1798	2.27997	1.18901	up
GO:0005201	extracellular matrix structural constituent	molecular_function	4	1.58647e-09	ENSRNOG00000031475	Col16a1	collagen type XVI alpha 1 chain [Source:RGD Symbol;Acc:1310982]	57.2427	51.0177	56.7959	19.2783	19.235	17.3131	2.9566	1.56394	up
GO:0005201	extracellular matrix structural constituent	molecular_function	4	1.58647e-09	ENSRNOG00000039668	Col8a1	collagen type VIII alpha 1 chain [Source:RGD Symbol;Acc:1309361]	7.63818	9.19059	8.64372	1.20062	1.48089	1.47494	6.12843	2.61552	up
GO:0005201	extracellular matrix structural constituent	molecular_function	4	1.58647e-09	ENSRNOG00000043219	Fbn2	fibrillin 2 [Source:RGD Symbol;Acc:620910]	0.242883	0.091204	0.036928	0.019889	0.007176	0.00671	10.9849	3.45745	up
GO:0005201	extracellular matrix structural constituent	molecular_function	4	1.58647e-09	ENSRNOG00000052925	NEWGENE_621351	collagen, type I, alpha 2 [Source:RGD Symbol;Acc:9452897]	98.967	66.7797	60.9449	18.46	15.0008	14.0315	4.77323	2.25497	up
GO:0005201	extracellular matrix structural constituent	molecular_function	4	1.58647e-09	ENSRNOG00000060381	Col15a1	collagen type XV alpha 1 chain [Source:RGD Symbol;Acc:1310820]	21.3702	31.2652	30.8648	2.72355	3.70059	6.38776	6.51739	2.70429	up
GO:0005509	calcium ion binding	molecular_function	7	2.58508e-09	ENSRNOG00000000341	Nid2	nidogen 2 [Source:RGD Symbol;Acc:1311685]	5.85374	5.92398	4.96026	2.31282	2.30347	2.63372	2.30869	1.20707	up
GO:0005509	calcium ion binding	molecular_function	7	2.58508e-09	ENSRNOG00000000500	Scube3	signal peptide, CUB domain and EGF like domain containing 3 [Source:RGD Symbol;Acc:1304880]	0.922497	0.680804	0.758465	0.331512	0.289027	0.272959	2.64328	1.40233	up
GO:0005509	calcium ion binding	molecular_function	7	2.58508e-09	ENSRNOG00000000562	Prf1	perforin 1 [Source:RGD Symbol;Acc:708463]	8.20777	9.31399	3.00773	32.4085	55.6601	39.4225	0.161027	-2.63463	down
GO:0005509	calcium ion binding	molecular_function	7	2.58508e-09	ENSRNOG00000001128	Tesc	tescalcin [Source:RGD Symbol;Acc:1566317]	2.42516	1.34163	1.4317	8.03471	10.8739	10.8534	0.174669	-2.5173	down
GO:0005509	calcium ion binding	molecular_function	7	2.58508e-09	ENSRNOG00000001216	Trpm2	transient receptor potential cation channel, subfamily M, member 2 [Source:RGD Symbol;Acc:1311889]	2.73189	2.39503	2.50324	6.81675	11.5299	8.15396	0.287924	-1.79624	down
GO:0005509	calcium ion binding	molecular_function	7	2.58508e-09	ENSRNOG00000001796	Dgkg	diacylglycerol kinase, gamma [Source:RGD Symbol;Acc:2499]	0.478014	0.657643	0.542705	1.34259	1.57348	2.23499	0.325828	-1.61782	down
GO:0005509	calcium ion binding	molecular_function	7	2.58508e-09	ENSRNOG00000002461	Nid1	nidogen 1 [Source:RGD Symbol;Acc:3178]	27.7591	33.8089	25.3969	7.0868	7.3753	8.23495	3.83155	1.93793	up
GO:0005509	calcium ion binding	molecular_function	7	2.58508e-09	ENSRNOG00000002746	Fstl1	follistatin-like 1 [Source:RGD Symbol;Acc:68955]	76.3812	73.9106	69.2725	28.1826	25.0882	37.0014	2.43224	1.28229	up
GO:0005509	calcium ion binding	molecular_function	7	2.58508e-09	ENSRNOG00000002794	Selp	selectin P [Source:RGD Symbol;Acc:3656]	3.596	2.43421	6.01392	1.27506	1.4035	1.324	3.0091	1.58933	up
GO:0005509	calcium ion binding	molecular_function	7	2.58508e-09	ENSRNOG00000003929	Pcdh19	protocadherin 19 [Source:RGD Symbol;Acc:1565392]	1.1074	1.82213	1.00018	2.27102	3.07318	4.05547	0.418069	-1.25819	down
GO:0005509	calcium ion binding	molecular_function	7	2.58508e-09	ENSRNOG00000003998	Sgca	sarcoglycan, alpha [Source:RGD Symbol;Acc:1308062]	2.86595	3.15146	2.51249	0.916284	2.09906	1.11714	2.06411	1.04552	up
GO:0005509	calcium ion binding	molecular_function	7	2.58508e-09	ENSRNOG00000004540	Clec3b	C-type lectin domain family 3, member B [Source:RGD Symbol;Acc:1311031]	120.517	107.673	87.2039	42.8811	43.4075	48.0254	2.34818	1.23154	up
GO:0005509	calcium ion binding	molecular_function	7	2.58508e-09	ENSRNOG00000004560	Cacna1b	calcium voltage-gated channel subunit alpha1 B [Source:RGD Symbol;Acc:628852]	0.178632	0.207804	0.083371	0.0219777	0.0460863	0.0587362	3.7051	1.88951	up
GO:0005509	calcium ion binding	molecular_function	7	2.58508e-09	ENSRNOG00000004678	Itln1	intelectin 1 [Source:RGD Symbol;Acc:1561048]	31.1376	11.9098	12.7291	0.250435	0.678958	1.06113	28.0211	4.80844	up
GO:0005509	calcium ion binding	molecular_function	7	2.58508e-09	ENSRNOG00000005515	Rhbdl3	rhomboid like 3 [Source:RGD Symbol;Acc:1311901]	9.37657	6.92596	20.658	4.73444	4.20402	4.75953	2.69825	1.43202	up
GO:0005509	calcium ion binding	molecular_function	7	2.58508e-09	ENSRNOG00000005695	Mgp	matrix Gla protein [Source:RGD Symbol;Acc:3088]	1255.23	1265.23	1669.19	489.588	429.302	355.595	3.28734	1.71692	up
GO:0005509	calcium ion binding	molecular_function	7	2.58508e-09	ENSRNOG00000006583	Hpgds	hematopoietic prostaglandin D synthase [Source:RGD Symbol;Acc:69251]	1.69319	0.758445	0.936303	0.319459	0.37114	0.312633	3.37703	1.75575	up
GO:0005509	calcium ion binding	molecular_function	7	2.58508e-09	ENSRNOG00000006645	Ryr3	ryanodine receptor 3 [Source:RGD Symbol;Acc:68952]	0.552848	0.70992	0.557857	1.46945	1.2114	2.06304	0.383784	-1.38163	down
GO:0005509	calcium ion binding	molecular_function	7	2.58508e-09	ENSRNOG00000006930	Casq1	calsequestrin 1 [Source:RGD Symbol;Acc:1586677]	1.6686	1.08073	1.22014	0.755118	0.505419	0.320053	2.51138	1.32848	up
GO:0005509	calcium ion binding	molecular_function	7	2.58508e-09	ENSRNOG00000006950	Padi3	peptidyl arginine deiminase 3 [Source:RGD Symbol;Acc:3289]	0.763369	0.143452	0.154063	0.069387	0.052512	0.043338	6.42038	2.68266	up
GO:0005509	calcium ion binding	molecular_function	7	2.58508e-09	ENSRNOG00000007067	Padi1	peptidyl arginine deiminase 1 [Source:RGD Symbol;Acc:3287]	0.139281	0.113586	0.158073	0	0.044415	0.026181	5.82101	2.54127	up
GO:0005509	calcium ion binding	molecular_function	7	2.58508e-09	ENSRNOG00000007302	Fbn1	fibrillin 1 [Source:RGD Symbol;Acc:620908]	30.0541	29.7677	24.9997	8.20277	8.09057	8.42094	3.43208	1.77909	up
GO:0005509	calcium ion binding	molecular_function	7	2.58508e-09	ENSRNOG00000007574	Padi2	peptidyl arginine deiminase 2 [Source:RGD Symbol;Acc:3288]	0.631519	0.83261	0.474646	1.13394	1.13447	1.80169	0.476346	-1.06992	down
GO:0005509	calcium ion binding	molecular_function	7	2.58508e-09	ENSRNOG00000007923	Cgref1	cell growth regulator with EF hand domain 1 [Source:RGD Symbol;Acc:620801]	4.43848	3.0019	2.05089	0.709811	0.776728	0.56149	4.63434	2.21236	up
GO:0005509	calcium ion binding	molecular_function	7	2.58508e-09	ENSRNOG00000008323	Pitpnm3	PITPNM family member 3 [Source:RGD Symbol;Acc:1308200]	8.96581	8.81481	6.95517	16.0525	18.3679	16.013	0.490464	-1.02778	down
GO:0005509	calcium ion binding	molecular_function	7	2.58508e-09	ENSRNOG00000008970	Pcdh17	protocadherin 17 [Source:RGD Symbol;Acc:1304753]	4.9088	7.17492	5.10665	1.79822	1.68239	3.28292	2.54163	1.34575	up
GO:0005509	calcium ion binding	molecular_function	7	2.58508e-09	ENSRNOG00000009951	Aif1l	allograft inflammatory factor 1-like [Source:RGD Symbol;Acc:1305081]	4.73017	2.79931	5.46201	0.984278	1.11737	1.01606	4.16701	2.05901	up
GO:0005509	calcium ion binding	molecular_function	7	2.58508e-09	ENSRNOG00000010057	Clec4n	C-type lectin domain family 4, member n [Source:MGI Symbol;Acc:MGI:1861231]	0	1.03321	0.413927	0	0	0	4823.8	12.236	up
GO:0005509	calcium ion binding	molecular_function	7	2.58508e-09	ENSRNOG00000010529	Thbs2	thrombospondin 2 [Source:RGD Symbol;Acc:1310979]	16.9175	9.7328	15.9974	0.842375	0.59486	0.649489	20.4376	4.35316	up
GO:0005509	calcium ion binding	molecular_function	7	2.58508e-09	ENSRNOG00000011039	Gch1	GTP cyclohydrolase 1 [Source:RGD Symbol;Acc:61992]	24.2456	21.4661	37.719	12.8307	12.749	11.0912	2.27513	1.18595	up
GO:0005509	calcium ion binding	molecular_function	7	2.58508e-09	ENSRNOG00000011706	Mbl1	mannose-binding lectin (protein A) 1 [Source:RGD Symbol;Acc:3055]	2.56921	3.06382	2.73128	0.495776	1.10101	0.920711	3.32248	1.73226	up
GO:0005509	calcium ion binding	molecular_function	7	2.58508e-09	ENSRNOG00000011796	C1r	complement C1r [Source:RGD Symbol;Acc:1309091]	123.094	95.9083	133.697	50.3805	41.8088	43.88	2.59206	1.3741	up
GO:0005509	calcium ion binding	molecular_function	7	2.58508e-09	ENSRNOG00000011971	C1s	complement C1s [Source:RGD Symbol;Acc:619983]	123.565	79.6933	122.779	33.0371	24.7081	21.0409	4.13826	2.04903	up
GO:0005509	calcium ion binding	molecular_function	7	2.58508e-09	ENSRNOG00000012058	Egflam	EGF-like, fibronectin type III and laminin G domains [Source:RGD Symbol;Acc:1306592]	5.80616	6.93893	4.79697	2.05351	2.02171	3.25163	2.39421	1.25955	up
GO:0005509	calcium ion binding	molecular_function	7	2.58508e-09	ENSRNOG00000012094	Ltbp2	latent transforming growth factor beta binding protein 2 [Source:RGD Symbol;Acc:68380]	86.7247	103.664	104.236	13.8809	17.5958	18.0348	5.95062	2.57304	up
GO:0005509	calcium ion binding	molecular_function	7	2.58508e-09	ENSRNOG00000012367	Pcdh7	protocadherin 7 [Source:RGD Symbol;Acc:1303209]	2.73789	2.8915	4.27544	0.812085	0.617343	0.767092	4.50933	2.17291	up
GO:0005509	calcium ion binding	molecular_function	7	2.58508e-09	ENSRNOG00000012840	Sparc	secreted protein acidic and cysteine rich [Source:RGD Symbol;Acc:3742]	1859.4	1712.29	1518.68	726.387	694.718	834.72	2.25655	1.17412	up
GO:0005509	calcium ion binding	molecular_function	7	2.58508e-09	ENSRNOG00000013123	Scube2	signal peptide, CUB domain and EGF like domain containing 2 [Source:RGD Symbol;Acc:1563998]	0.455884	0.895264	0.540782	1.81237	2.70434	2.76748	0.259731	-1.94491	down
GO:0005509	calcium ion binding	molecular_function	7	2.58508e-09	ENSRNOG00000013481	Cdh11	cadherin 11 [Source:RGD Symbol;Acc:619742]	23.3785	20.9201	14.0615	9.11527	8.39271	4.83833	2.61162	1.38494	up
GO:0005509	calcium ion binding	molecular_function	7	2.58508e-09	ENSRNOG00000014409	Myl7	myosin light chain 7 [Source:RGD Symbol;Acc:1308262]	0.119219	0.0167495	0.0100427	5.72545	0.117447	1.76474	0.0191928	-5.70329	down
GO:0005509	calcium ion binding	molecular_function	7	2.58508e-09	ENSRNOG00000014751	Ret	ret proto-oncogene [Source:RGD Symbol;Acc:3556]	2.67711	3.95788	2.72819	6.89043	7.6607	6.25602	0.449998	-1.15201	down
GO:0005509	calcium ion binding	molecular_function	7	2.58508e-09	ENSRNOG00000015220	Crtac1	cartilage acidic protein 1 [Source:RGD Symbol;Acc:621085]	1.01347	0.71732	1.37827	0.450903	0.218255	0.403717	2.89788	1.535	up
GO:0005509	calcium ion binding	molecular_function	7	2.58508e-09	ENSRNOG00000015408	Vil1	villin 1 [Source:RGD Symbol;Acc:1307048]	0.084717	0.738391	0.326871	1.03639	1.03462	1.77358	0.299117	-1.74122	down
GO:0005509	calcium ion binding	molecular_function	7	2.58508e-09	ENSRNOG00000015410	Aspnl1	asporin-like 1 [Source:RGD Symbol;Acc:9278606]	10.0883	6.71144	5.45763	1.48248	0.809754	1.37603	6.06754	2.60111	up
GO:0005509	calcium ion binding	molecular_function	7	2.58508e-09	ENSRNOG00000015562	Cdh17	cadherin 17 [Source:RGD Symbol;Acc:619748]	1.36051	1.62806	1.03261	0.423343	0.744103	0.576678	2.30556	1.20512	up
GO:0005509	calcium ion binding	molecular_function	7	2.58508e-09	ENSRNOG00000015941	Fkbp10	FKBP prolyl isomerase 10 [Source:RGD Symbol;Acc:1549751]	23.0641	18.9003	19.105	8.4768	7.98054	10.3216	2.2805	1.18935	up
GO:0005509	calcium ion binding	molecular_function	7	2.58508e-09	ENSRNOG00000016103	Nkd2	NKD inhibitor of WNT signaling pathway 2 [Source:RGD Symbol;Acc:1311459]	10.8553	12.6917	12.7366	5.29418	6.23578	5.7001	2.10583	1.07439	up
GO:0005509	calcium ion binding	molecular_function	7	2.58508e-09	ENSRNOG00000016243	Casq2	calsequestrin 2 [Source:RGD Symbol;Acc:2276]	2.2477	1.31137	2.18431	0.43062	0.245838	0.202781	6.53222	2.70757	up
GO:0005509	calcium ion binding	molecular_function	7	2.58508e-09	ENSRNOG00000016306	Adgrv1	adhesion G protein-coupled receptor V1 [Source:RGD Symbol;Acc:1562101]	0.213258	0.280477	0.140783	0.766308	0.792711	0.77095	0.272329	-1.87658	down
GO:0005509	calcium ion binding	molecular_function	7	2.58508e-09	ENSRNOG00000016758	Loxl2	lysyl oxidase-like 2 [Source:RGD Symbol;Acc:1308435]	19.6039	17.8362	15.6078	4.77017	4.27398	5.86148	3.55891	1.83144	up
GO:0005509	calcium ion binding	molecular_function	7	2.58508e-09	ENSRNOG00000016945	Pla2g2a	phospholipase A2 group IIA [Source:RGD Symbol;Acc:620857]	430.776	142.041	305.208	62.6552	8.5295	13.1795	10.4076	3.37956	up
GO:0005509	calcium ion binding	molecular_function	7	2.58508e-09	ENSRNOG00000017550	Fbln7	fibulin 7 [Source:RGD Symbol;Acc:1310131]	2.12487	2.35438	3.22144	0.351986	0.223479	0.327008	8.53288	3.09303	up
GO:0005509	calcium ion binding	molecular_function	7	2.58508e-09	ENSRNOG00000017645	Mylpf	myosin light chain, phosphorylatable, fast skeletal muscle [Source:RGD Symbol;Acc:3141]	2.23646	2.79222	1.58914	5.37923	8.99875	4.30547	0.354207	-1.49733	down
GO:0005509	calcium ion binding	molecular_function	7	2.58508e-09	ENSRNOG00000017833	Actn2	actinin alpha 2 [Source:RGD Symbol;Acc:1308097]	0.014556	0.085251	0.118502	0.888662	0.114628	0.322218	0.164698	-2.6021	down
GO:0005509	calcium ion binding	molecular_function	7	2.58508e-09	ENSRNOG00000018018	Kcnip2	potassium voltage-gated channel interacting protein 2 [Source:RGD Symbol;Acc:70887]	0.121117	0.243101	0.146428	0.383199	0.708244	0.559031	0.309394	-1.69248	down
GO:0005509	calcium ion binding	molecular_function	7	2.58508e-09	ENSRNOG00000018059	Ihh	Indian hedgehog signaling molecule [Source:RGD Symbol;Acc:620021]	0.149505	0.246864	0.042178	0.508533	0.832047	0.848627	0.200322	-2.31961	down
GO:0005509	calcium ion binding	molecular_function	7	2.58508e-09	ENSRNOG00000018991	Gsn	gelsolin [Source:RGD Symbol;Acc:1303089]	421.812	450.543	281.254	1095.5	923.271	1115.79	0.368029	-1.44211	down
GO:0005509	calcium ion binding	molecular_function	7	2.58508e-09	ENSRNOG00000020246	Myl9	myosin light chain 9 [Source:RGD Symbol;Acc:1311235]	135.556	142.75	155.595	45.8177	50.7849	52.6763	2.90665	1.53936	up
GO:0005509	calcium ion binding	molecular_function	7	2.58508e-09	ENSRNOG00000020587	Efemp2	EGF containing fibulin extracellular matrix protein 2 [Source:RGD Symbol;Acc:1359496]	38.2272	32.29	41.6207	14.4099	14.0551	14.4292	2.61429	1.38642	up
GO:0005509	calcium ion binding	molecular_function	7	2.58508e-09	ENSRNOG00000021098	Rasgrp2	RAS guanyl releasing protein 2 [Source:RGD Symbol;Acc:1311630]	8.21941	9.41176	4.73127	17.3456	22.6314	17.6577	0.388003	-1.36586	down
GO:0005509	calcium ion binding	molecular_function	7	2.58508e-09	ENSRNOG00000022704	Esyt3	extended synaptotagmin 3 [Source:RGD Symbol;Acc:1561304]	4.60494	3.83258	4.8373	11.1262	11.8978	7.60453	0.433413	-1.20618	down
GO:0005509	calcium ion binding	molecular_function	7	2.58508e-09	ENSRNOG00000024986	Mmrn1	multimerin 1 [Source:RGD Symbol;Acc:1587248]	6.71	6.87889	4.98429	3.34453	2.59372	2.82997	2.11824	1.08286	up
GO:0005509	calcium ion binding	molecular_function	7	2.58508e-09	ENSRNOG00000025498	Crb2	crumbs cell polarity complex component 2 [Source:RGD Symbol;Acc:1309368]	1.62528	0.959169	2.13547	1.09475	0.725931	0.361578	2.16286	1.11294	up
GO:0005509	calcium ion binding	molecular_function	7	2.58508e-09	ENSRNOG00000027232	Pcdhga11	protocadherin gamma subfamily A, 11 [Source:MGI Symbol;Acc:MGI:1935228]	0.300315	0.542542	0.551657	0.787219	1.01469	1.04364	0.490067	-1.02895	down
GO:0005509	calcium ion binding	molecular_function	7	2.58508e-09	ENSRNOG00000027253	Pcdhga10	protocadherin gamma subfamily A, 10 [Source:MGI Symbol;Acc:MGI:1935227]	1.08135	1.17897	0.689058	1.67217	2.19958	2.22987	0.483377	-1.04878	down
GO:0005509	calcium ion binding	molecular_function	7	2.58508e-09	ENSRNOG00000028837	AC128207		5.16805	5.29838	4.42727	9.90169	14.0856	9.10117	0.450118	-1.15163	down
GO:0005509	calcium ion binding	molecular_function	7	2.58508e-09	ENSRNOG00000029047	Cubn	cubilin [Source:RGD Symbol;Acc:68355]	0.177492	0.151215	0.11754	0.324175	0.252624	0.366809	0.472915	-1.08035	down
GO:0005509	calcium ion binding	molecular_function	7	2.58508e-09	ENSRNOG00000029212	Vcan	versican [Source:RGD Symbol;Acc:619940]	6.90148	5.362	6.00161	1.03357	1.05354	0.986211	5.94312	2.57122	up
GO:0005509	calcium ion binding	molecular_function	7	2.58508e-09	ENSRNOG00000030187	Mmp12	matrix metallopeptidase 12 [Source:RGD Symbol;Acc:620195]	23.6153	23.6938	16.196	2.3016	0.393955	0.799687	18.169	4.18341	up
GO:0005509	calcium ion binding	molecular_function	7	2.58508e-09	ENSRNOG00000032699	Ttyh1	tweety family member 1 [Source:RGD Symbol;Acc:1310103]	0.26216	0.287879	0.123177	0.450375	0.597256	0.514098	0.431071	-1.214	down
GO:0005509	calcium ion binding	molecular_function	7	2.58508e-09	ENSRNOG00000033087	Cdh23	cadherin 23 (otocadherin) [Source:MGI Symbol;Acc:MGI:1890219]	0.141031	0.164882	0.211425	0.318243	0.551942	0.385107	0.412126	-1.27884	down
GO:0005509	calcium ion binding	molecular_function	7	2.58508e-09	ENSRNOG00000033119	Plcb4	phospholipase C, beta 4 [Source:RGD Symbol;Acc:3345]	7.14989	7.94063	6.17429	13.1434	15.847	14.3553	0.490587	-1.02742	down
GO:0005509	calcium ion binding	molecular_function	7	2.58508e-09	ENSRNOG00000033352	S100a7a	S100 calcium binding protein A7A [Source:RGD Symbol;Acc:1593779]	0	0	0	0.144351	0.1751	0.246244	0.000530321	-10.8808	down
GO:0005509	calcium ion binding	molecular_function	7	2.58508e-09	ENSRNOG00000033837	Cdh9	cadherin 9 [Source:RGD Symbol;Acc:1308343]	0.037874	0	0.027494	0.151011	0.255395	0.117604	0.124746	-3.00294	down
GO:0005509	calcium ion binding	molecular_function	7	2.58508e-09	ENSRNOG00000043007	Rcn3	reticulocalbin 3 [Source:RGD Symbol;Acc:1359365]	34.5242	27.4662	26.2396	14.2598	12.4471	13.6424	2.18665	1.12872	up
GO:0005509	calcium ion binding	molecular_function	7	2.58508e-09	ENSRNOG00000043219	Fbn2	fibrillin 2 [Source:RGD Symbol;Acc:620910]	0.242883	0.091204	0.036928	0.019889	0.007176	0.00671	10.9849	3.45745	up
GO:0005509	calcium ion binding	molecular_function	7	2.58508e-09	ENSRNOG00000045829	Thbs1	thrombospondin 1 [Source:RGD Symbol;Acc:1588455]	69.4641	106.372	164.303	19.9347	19.858	26.7682	5.11019	2.35338	up
GO:0005509	calcium ion binding	molecular_function	7	2.58508e-09	ENSRNOG00000046264	Pcdhb7	protocadherin beta 7 [Source:RGD Symbol;Acc:1309422]	1.23071	1.4461	0.622516	0.490801	0.423793	0.650195	2.10848	1.0762	up
GO:0005509	calcium ion binding	molecular_function	7	2.58508e-09	ENSRNOG00000047174	Pcdha4	protocadherin alpha 4 [Source:RGD Symbol;Acc:620337]	0.886611	1.47262	1.28061	0.561244	0.492371	0.567795	2.24486	1.16663	up
GO:0005509	calcium ion binding	molecular_function	7	2.58508e-09	ENSRNOG00000050325	Adgre4	adhesion G protein-coupled receptor E4 [Source:RGD Symbol;Acc:1359641]	0.662652	0.336873	0.391175	1.15164	1.93271	0.888433	0.350057	-1.51434	down
GO:0005509	calcium ion binding	molecular_function	7	2.58508e-09	ENSRNOG00000050431	Aspn	asporin [Source:RGD Symbol;Acc:1549776]	9.79917	6.51414	5.23546	1.07928	0.840526	0.925104	7.5745	2.92115	up
GO:0005509	calcium ion binding	molecular_function	7	2.58508e-09	ENSRNOG00000050450	LOC100911951	Kv channel-interacting protein 2-like [Source:RGD Symbol;Acc:6489795]	0.131876	0.222856	0.164391	0.409559	0.802689	0.749079	0.26468	-1.91768	down
GO:0005509	calcium ion binding	molecular_function	7	2.58508e-09	ENSRNOG00000050539	Fbln5	fibulin 5 [Source:RGD Symbol;Acc:2594]	75.8039	91.3075	58.3569	25.7062	25.9353	36.1296	2.56882	1.36111	up
GO:0005509	calcium ion binding	molecular_function	7	2.58508e-09	ENSRNOG00000050675	Myl4	myosin, light chain 4 [Source:RGD Symbol;Acc:1591197]	0.719864	0.702105	0.524042	7.65628	0.763299	3.20716	0.167374	-2.57885	down
GO:0005509	calcium ion binding	molecular_function	7	2.58508e-09	ENSRNOG00000051964	LOC108348190	uncharacterized LOC108348190 [Source:RGD Symbol;Acc:11520363]	0.212498	0.315292	0.147029	0.358931	0.514377	0.568232	0.468124	-1.09504	down
GO:0005509	calcium ion binding	molecular_function	7	2.58508e-09	ENSRNOG00000053449	Cracr2a	calcium release activated channel regulator 2A [Source:MGI Symbol;Acc:MGI:2685919]	1.01391	1.02784	1.09702	1.46914	3.12379	2.72871	0.428698	-1.22197	down
GO:0005509	calcium ion binding	molecular_function	7	2.58508e-09	ENSRNOG00000053979	Egf	epidermal growth factor [Source:RGD Symbol;Acc:2542]	0.231125	0.210644	0.150715	0.359763	0.574026	0.669871	0.369457	-1.43652	down
GO:0005509	calcium ion binding	molecular_function	7	2.58508e-09	ENSRNOG00000056756	Actn1	actinin, alpha 1 [Source:RGD Symbol;Acc:70907]	53.4333	54.3079	64.5786	24.6416	28.3915	29.6839	2.08324	1.05883	up
GO:0005509	calcium ion binding	molecular_function	7	2.58508e-09	ENSRNOG00000056783	Cd69	Cd69 molecule [Source:RGD Symbol;Acc:61318]	2.37731	3.96908	1.98914	8.9826	9.16437	7.94289	0.319493	-1.64614	down
GO:0005509	calcium ion binding	molecular_function	7	2.58508e-09	ENSRNOG00000059834	Cib2	calcium and integrin binding family member 2 [Source:RGD Symbol;Acc:1308718]	2.72637	2.4149	1.93511	0.970316	0.869021	1.44054	2.15751	1.10937	up
GO:0005509	calcium ion binding	molecular_function	7	2.58508e-09	ENSRNOG00000060054	Doc2b	double C2 domain beta [Source:RGD Symbol;Acc:620519]	0.999362	1.10969	1.00828	1.93796	2.95543	5.1734	0.309665	-1.69122	down
GO:0006954	inflammatory response	biological_process	6	2.85484e-09	ENSRNOG00000000239	Ccl7	C-C motif chemokine ligand 7 [Source:RGD Symbol;Acc:1359152]	14.4232	11.1589	18.1968	0.946133	0.831492	2.17106	11.087	3.47079	up
GO:0006954	inflammatory response	biological_process	6	2.85484e-09	ENSRNOG00000000443	LOC103689965	complement C4-like [Source:RGD Symbol;Acc:9245878]	395.482	429.193	522.626	207.914	155.051	131.31	2.72582	1.44669	up
GO:0006954	inflammatory response	biological_process	6	2.85484e-09	ENSRNOG00000002525	Ptgs2	prostaglandin-endoperoxide synthase 2 [Source:RGD Symbol;Acc:620349]	1.16561	3.47891	3.42764	1.65163	1.08205	1.05589	2.1301	1.09092	up
GO:0006954	inflammatory response	biological_process	6	2.85484e-09	ENSRNOG00000002723	Sele	selectin E [Source:RGD Symbol;Acc:3654]	2.98187	1.19921	3.6168	0.289072	0.400788	0.3301	7.64528	2.93457	up
GO:0006954	inflammatory response	biological_process	6	2.85484e-09	ENSRNOG00000002794	Selp	selectin P [Source:RGD Symbol;Acc:3656]	3.596	2.43421	6.01392	1.27506	1.4035	1.324	3.0091	1.58933	up
GO:0006954	inflammatory response	biological_process	6	2.85484e-09	ENSRNOG00000004404	Tac4	tachykinin 4 [Source:RGD Symbol;Acc:628842]	5.30119	5.34132	4.09235	0.769295	0.661404	0.350317	8.27329	3.04846	up
GO:0006954	inflammatory response	biological_process	6	2.85484e-09	ENSRNOG00000004488	Bdkrb1	bradykinin receptor B1 [Source:RGD Symbol;Acc:620401]	0.213898	0.179507	1.7444	0	0.153112	0.038042	11.1837	3.48332	up
GO:0006954	inflammatory response	biological_process	6	2.85484e-09	ENSRNOG00000006579	Reg3g	regenerating family member 3 gamma [Source:RGD Symbol;Acc:3256]	3.69088	0.080361	3.74511	0	0	0	25054.5	14.6128	up
GO:0006954	inflammatory response	biological_process	6	2.85484e-09	ENSRNOG00000006736	Ccr3	C-C motif chemokine receptor 3 [Source:RGD Symbol;Acc:620593]	0.551225	0.302268	0.337885	1.23779	0.699775	0.888156	0.421619	-1.24599	down
GO:0006954	inflammatory response	biological_process	6	2.85484e-09	ENSRNOG00000007159	Ccl2	C-C motif chemokine ligand 2 [Source:RGD Symbol;Acc:3645]	37.7066	18.9936	41.8423	1.20024	1.4775	2.90705	17.6448	4.14117	up
GO:0006954	inflammatory response	biological_process	6	2.85484e-09	ENSRNOG00000007178	Cd8a	CD8a molecule [Source:RGD Symbol;Acc:2316]	6.78804	8.40062	2.99683	17.1877	29.9419	15.0684	0.292381	-1.77408	down
GO:0006954	inflammatory response	biological_process	6	2.85484e-09	ENSRNOG00000007335	Ccl11	C-C motif chemokine ligand 11 [Source:RGD Symbol;Acc:3644]	3.34409	1.3286	2.39904	6.15745	3.9376	18.2383	0.249591	-2.00236	down
GO:0006954	inflammatory response	biological_process	6	2.85484e-09	ENSRNOG00000007374	Tac1	tachykinin, precursor 1 [Source:RGD Symbol;Acc:3807]	0.715164	0.85091	1.28238	3.61698	2.4429	1.33902	0.384984	-1.37713	down
GO:0006954	inflammatory response	biological_process	6	2.85484e-09	ENSRNOG00000010906	Ccl5	C-C motif chemokine ligand 5 [Source:RGD Symbol;Acc:69069]	33.6073	45.533	17.0812	161.621	269.977	147.801	0.166071	-2.59013	down
GO:0006954	inflammatory response	biological_process	6	2.85484e-09	ENSRNOG00000011130	Calca	calcitonin-related polypeptide alpha [Source:RGD Symbol;Acc:2254]	0.0864105	0.283044	0.149482	0.762545	1.17682	1.38808	0.155957	-2.68078	down
GO:0006954	inflammatory response	biological_process	6	2.85484e-09	ENSRNOG00000013231	Ptafr	platelet-activating factor receptor [Source:RGD Symbol;Acc:61897]	11.0138	10.7414	8.49307	4.64952	3.76824	5.12655	2.23329	1.15917	up
GO:0006954	inflammatory response	biological_process	6	2.85484e-09	ENSRNOG00000015076	Cyp26b1	cytochrome P450, family 26, subfamily b, polypeptide 1 [Source:RGD Symbol;Acc:631379]	1.58593	4.05498	1.79919	5.41083	6.21138	5.81279	0.426733	-1.22859	down
GO:0006954	inflammatory response	biological_process	6	2.85484e-09	ENSRNOG00000015156	Gal	galanin and GMAP prepropeptide [Source:RGD Symbol;Acc:61954]	3.00749	6.39934	1.08286	0.483463	1.01067	0.118952	6.50286	2.70107	up
GO:0006954	inflammatory response	biological_process	6	2.85484e-09	ENSRNOG00000015858	Hyal1	hyaluronidase 1 [Source:RGD Symbol;Acc:1303060]	13.1911	9.38187	9.33985	18.5813	21.0105	34.4394	0.431072	-1.214	down
GO:0006954	inflammatory response	biological_process	6	2.85484e-09	ENSRNOG00000015992	Ccl20	C-C motif chemokine ligand 20 [Source:RGD Symbol;Acc:3646]	3.55187	1.52624	2.52854	0.934769	1.07933	0.51172	3.01156	1.59051	up
GO:0006954	inflammatory response	biological_process	6	2.85484e-09	ENSRNOG00000016278	Ccl17	C-C motif chemokine ligand 17 [Source:RGD Symbol;Acc:619924]	3.89019	6.53501	5.24364	1.31455	3.29401	1.16464	2.71406	1.44045	up
GO:0006954	inflammatory response	biological_process	6	2.85484e-09	ENSRNOG00000016535	Ccl22	C-C motif chemokine ligand 22 [Source:RGD Symbol;Acc:619933]	0.579045	2.03706	1.27757	0.082517	0.590059	0.297163	4.01517	2.00546	up
GO:0006954	inflammatory response	biological_process	6	2.85484e-09	ENSRNOG00000016571	Ngf	nerve growth factor [Source:RGD Symbol;Acc:1598328]	0.683532	0.348949	0.591755	0.156563	0.22621	0.0462036	3.78631	1.92079	up
GO:0006954	inflammatory response	biological_process	6	2.85484e-09	ENSRNOG00000016887	Hrh4	histamine receptor H4 [Source:RGD Symbol;Acc:620631]	0.195294	0.196548	0.02878	0	0	0	1402.07	10.4533	up
GO:0006954	inflammatory response	biological_process	6	2.85484e-09	ENSRNOG00000017429	Lat	linker for activation of T cells [Source:RGD Symbol;Acc:620802]	7.77653	7.11948	5.88298	20.675	13.8754	9.08614	0.476183	-1.07041	down
GO:0006954	inflammatory response	biological_process	6	2.85484e-09	ENSRNOG00000018839	Ntrk2	neurotrophic receptor tyrosine kinase 2 [Source:RGD Symbol;Acc:3213]	2.74908	5.01041	5.1754	0.644865	1.09069	0.941283	4.83215	2.27267	up
GO:0006954	inflammatory response	biological_process	6	2.85484e-09	ENSRNOG00000019695	Il17b	interleukin 17B [Source:RGD Symbol;Acc:620614]	1.02491	1.03218	0.807308	0.063734	0.31913	0.242836	4.57791	2.19469	up
GO:0006954	inflammatory response	biological_process	6	2.85484e-09	ENSRNOG00000020993	Ms4a2	membrane spanning 4-domains A2 [Source:RGD Symbol;Acc:2598]	7.02676	2.45204	1.76553	1.26067	0.858921	0.875766	3.75392	1.9084	up
GO:0006954	inflammatory response	biological_process	6	2.85484e-09	ENSRNOG00000021276	Bmp2	bone morphogenetic protein 2 [Source:RGD Symbol;Acc:2211]	3.40519	7.43167	5.53057	2.54594	1.70193	2.53326	2.41367	1.27123	up
GO:0006954	inflammatory response	biological_process	6	2.85484e-09	ENSRNOG00000021851	Ccl1	C-C motif chemokine ligand 1 [Source:RGD Symbol;Acc:1586495]	1.29096	0.891293	0.828182	0.159979	0	0	18.8177	4.23402	up
GO:0006954	inflammatory response	biological_process	6	2.85484e-09	ENSRNOG00000022298	Cxcl11	C-X-C motif chemokine ligand 11 [Source:RGD Symbol;Acc:727827]	0.612395	0.600572	0.531235	0.05833	0.123484	0.076764	6.74536	2.7539	up
GO:0006954	inflammatory response	biological_process	6	2.85484e-09	ENSRNOG00000029768	Ccl12	chemokine (C-C motif) ligand 12 [Source:RGD Symbol;Acc:1309255]	6.0007	2.47451	2.57848	0	0.075135	0.603588	16.286	4.02556	up
GO:0006954	inflammatory response	biological_process	6	2.85484e-09	ENSRNOG00000030729	C4b	complement C4B (Chido blood group) [Source:RGD Symbol;Acc:1591983]	148.236	96.3311	177.334	61.2505	54.7645	47.2938	2.58345	1.3693	up
GO:0006954	inflammatory response	biological_process	6	2.85484e-09	ENSRNOG00000031162	Ccl24	C-C motif chemokine ligand 24 [Source:RGD Symbol;Acc:1310245]	5.13001	4.48235	6.31795	1.67853	1.29167	1.65069	3.44746	1.78553	up
GO:0006954	inflammatory response	biological_process	6	2.85484e-09	ENSRNOG00000031331	Fpr3	formyl peptide receptor 3 [Source:RGD Symbol;Acc:1566044]	0.670042	0.388245	0.195651	1.79457	4.39186	0.981199	0.174944	-2.51503	down
GO:0006954	inflammatory response	biological_process	6	2.85484e-09	ENSRNOG00000031443	Havcr2	hepatitis A virus cellular receptor 2 [Source:RGD Symbol;Acc:1305233]	1.59267	1.74202	1.71679	0.758987	0.444499	0.545722	2.88787	1.53	up
GO:0006954	inflammatory response	biological_process	6	2.85484e-09	ENSRNOG00000033352	S100a7a	S100 calcium binding protein A7A [Source:RGD Symbol;Acc:1593779]	0	0	0	0.144351	0.1751	0.246244	0.000530321	-10.8808	down
GO:0006954	inflammatory response	biological_process	6	2.85484e-09	ENSRNOG00000034290	Ccl21	C-C motif chemokine ligand 21 [Source:RGD Symbol;Acc:1311996]	171.913	158.057	123.877	70.7503	53.7025	41.4424	2.73575	1.45194	up
GO:0006954	inflammatory response	biological_process	6	2.85484e-09	ENSRNOG00000037467	Ffar3	free fatty acid receptor 3 [Source:RGD Symbol;Acc:1311035]	0.218127	0.129805	0.377051	0	0	0	2416.61	11.2388	up
GO:0006954	inflammatory response	biological_process	6	2.85484e-09	ENSRNOG00000042455	Tlr12	toll-like receptor 12 [Source:RGD Symbol;Acc:1559145]	1.03664	0.866943	1.3302	0.413048	0.391142	0.40812	2.66746	1.41546	up
GO:0006954	inflammatory response	biological_process	6	2.85484e-09	ENSRNOG00000043451	Spp1	secreted phosphoprotein 1 [Source:RGD Symbol;Acc:3752]	129.555	106.043	88.3967	9.8296	1.21233	1.83191	25.1669	4.65346	up
GO:0006954	inflammatory response	biological_process	6	2.85484e-09	ENSRNOG00000045829	Thbs1	thrombospondin 1 [Source:RGD Symbol;Acc:1588455]	69.4641	106.372	164.303	19.9347	19.858	26.7682	5.11019	2.35338	up
GO:0006954	inflammatory response	biological_process	6	2.85484e-09	ENSRNOG00000047657	C4a	complement C4A [Source:RGD Symbol;Acc:620005]	237.873	241.958	309.397	129.43	75.4955	80.8113	2.76208	1.46576	up
GO:0006954	inflammatory response	biological_process	6	2.85484e-09	ENSRNOG00000053272	Chi3l1	chitinase 3 like 1 [Source:RGD Symbol;Acc:620874]	187.923	110.593	195.544	69.2241	52.2938	54.6498	2.80449	1.48774	up
GO:0006954	inflammatory response	biological_process	6	2.85484e-09	ENSRNOG00000061373	Loxl3	lysyl oxidase-like 3 [Source:RGD Symbol;Acc:1311011]	3.27172	3.4309	2.96157	1.31599	1.16898	1.3919	2.49279	1.31776	up
GO:0042060	wound healing	biological_process	6	1.88001e-08	ENSRNOG00000002244	Pdgfra	platelet derived growth factor receptor alpha [Source:RGD Symbol;Acc:3284]	10.7913	10.4928	10.1398	22.5292	21.8926	24.1598	0.458196	-1.12596	down
GO:0042060	wound healing	biological_process	6	1.88001e-08	ENSRNOG00000002418	Tgfb2	transforming growth factor, beta 2 [Source:RGD Symbol;Acc:70491]	32.2616	34.4352	34.8496	12.3645	10.9716	12.4504	2.83756	1.50465	up
GO:0042060	wound healing	biological_process	6	1.88001e-08	ENSRNOG00000002460	Serpinb2	serpin family B member 2 [Source:RGD Symbol;Acc:621823]	0.101316	0.088103	1.2141	0.067856	0	0.028711	14.5341	3.86137	up
GO:0042060	wound healing	biological_process	6	1.88001e-08	ENSRNOG00000002930	Ppl	periplakin [Source:RGD Symbol;Acc:1305511]	21.5737	22.0105	20.709	38.7844	49.3785	42.6099	0.49164	-1.02432	down
GO:0042060	wound healing	biological_process	6	1.88001e-08	ENSRNOG00000003357	Col3a1	collagen type III alpha 1 chain [Source:RGD Symbol;Acc:71029]	773.166	628.281	469.974	156.474	148.568	159.465	4.02884	2.01036	up
GO:0042060	wound healing	biological_process	6	1.88001e-08	ENSRNOG00000003897	Col1a1	collagen type I alpha 1 chain [Source:RGD Symbol;Acc:61817]	330.164	210.993	127.588	21.9343	20.0594	21.0288	10.6112	3.40752	up
GO:0042060	wound healing	biological_process	6	1.88001e-08	ENSRNOG00000004470	Il24	interleukin 24 [Source:RGD Symbol;Acc:621484]	4.71744	2.76935	8.35128	0.381472	0.213099	0.210391	19.6755	4.29833	up
GO:0042060	wound healing	biological_process	6	1.88001e-08	ENSRNOG00000009867	Tgfb3	transforming growth factor, beta 3 [Source:RGD Symbol;Acc:3851]	28.04	20.6768	22.6266	8.0599	7.08636	6.45932	3.30208	1.72338	up
GO:0042060	wound healing	biological_process	6	1.88001e-08	ENSRNOG00000010208	Timp1	TIMP metallopeptidase inhibitor 1 [Source:RGD Symbol;Acc:621675]	191.725	124.836	377.443	39.0496	29.0957	32.338	6.90666	2.78799	up
GO:0042060	wound healing	biological_process	6	1.88001e-08	ENSRNOG00000010278	Il6	interleukin 6 [Source:RGD Symbol;Acc:2901]	3.16485	2.11915	11.0231	0.116354	0.115796	0.224046	35.7458	5.1597	up
GO:0042060	wound healing	biological_process	6	1.88001e-08	ENSRNOG00000012660	Postn	periostin [Source:RGD Symbol;Acc:1305285]	317.385	321.176	267.696	117.573	99.7376	147.058	2.4872	1.31452	up
GO:0042060	wound healing	biological_process	6	1.88001e-08	ENSRNOG00000012840	Sparc	secreted protein acidic and cysteine rich [Source:RGD Symbol;Acc:3742]	1859.4	1712.29	1518.68	726.387	694.718	834.72	2.25655	1.17412	up
GO:0042060	wound healing	biological_process	6	1.88001e-08	ENSRNOG00000014288	Fn1	fibronectin 1 [Source:RGD Symbol;Acc:2624]	280.945	248.379	229.735	57.4707	64.5711	77.3481	3.80691	1.92862	up
GO:0042060	wound healing	biological_process	6	1.88001e-08	ENSRNOG00000014426	Lox	lysyl oxidase [Source:RGD Symbol;Acc:3015]	56.109	59.4426	61.512	17.4454	17.4535	21.6606	3.13057	1.64643	up
GO:0042060	wound healing	biological_process	6	1.88001e-08	ENSRNOG00000015618	Wnt5a	Wnt family member 5A [Source:RGD Symbol;Acc:69250]	7.40085	6.90616	6.99221	3.0348	2.5955	2.2052	2.7183	1.4427	up
GO:0042060	wound healing	biological_process	6	1.88001e-08	ENSRNOG00000015992	Ccl20	C-C motif chemokine ligand 20 [Source:RGD Symbol;Acc:3646]	3.55187	1.52624	2.52854	0.934769	1.07933	0.51172	3.01156	1.59051	up
GO:0042060	wound healing	biological_process	6	1.88001e-08	ENSRNOG00000017369	Mustn1	musculoskeletal, embryonic nuclear protein 1 [Source:RGD Symbol;Acc:727804]	15.4088	15.5743	14.2392	8.99743	6.48916	7.04913	2.0067	1.00482	up
GO:0042060	wound healing	biological_process	6	1.88001e-08	ENSRNOG00000018461	Pdgfrb	platelet derived growth factor receptor beta [Source:RGD Symbol;Acc:3285]	29.9477	33.1625	27.8463	12.2108	11.6934	13.6546	2.42171	1.27603	up
GO:0042060	wound healing	biological_process	6	1.88001e-08	ENSRNOG00000018991	Gsn	gelsolin [Source:RGD Symbol;Acc:1303089]	421.812	450.543	281.254	1095.5	923.271	1115.79	0.368029	-1.44211	down
GO:0042060	wound healing	biological_process	6	1.88001e-08	ENSRNOG00000023683	Nog	noggin [Source:RGD Symbol;Acc:3183]	2.11527	1.40461	2.31452	0.699111	0.833725	0.961876	2.33871	1.22571	up
GO:0042060	wound healing	biological_process	6	1.88001e-08	ENSRNOG00000030187	Mmp12	matrix metallopeptidase 12 [Source:RGD Symbol;Acc:620195]	23.6153	23.6938	16.196	2.3016	0.393955	0.799687	18.169	4.18341	up
GO:0042060	wound healing	biological_process	6	1.88001e-08	ENSRNOG00000056550	Epb41l4b	erythrocyte membrane protein band 4.1 like 4B [Source:RGD Symbol;Acc:1562988]	3.41537	3.41587	2.8592	8.47673	9.34505	9.05211	0.36059	-1.47157	down
GO:0042060	wound healing	biological_process	6	1.88001e-08	ENSRNOG00000058111	Itga2	integrin subunit alpha 2 [Source:RGD Symbol;Acc:621632]	2.02287	2.41017	1.73864	0.541871	0.886078	0.645843	2.97604	1.57339	up
GO:0042060	wound healing	biological_process	6	1.88001e-08	ENSRNOG00000058645	Tnc	tenascin C [Source:RGD Symbol;Acc:621057]	32.8819	24.6221	38.6851	6.23045	5.06284	5.64608	5.67843	2.50549	up
GO:0048020	CCR chemokine receptor binding	molecular_function	8	4.2497e-08	ENSRNOG00000000239	Ccl7	C-C motif chemokine ligand 7 [Source:RGD Symbol;Acc:1359152]	14.4232	11.1589	18.1968	0.946133	0.831492	2.17106	11.087	3.47079	up
GO:0048020	CCR chemokine receptor binding	molecular_function	8	4.2497e-08	ENSRNOG00000007159	Ccl2	C-C motif chemokine ligand 2 [Source:RGD Symbol;Acc:3645]	37.7066	18.9936	41.8423	1.20024	1.4775	2.90705	17.6448	4.14117	up
GO:0048020	CCR chemokine receptor binding	molecular_function	8	4.2497e-08	ENSRNOG00000007335	Ccl11	C-C motif chemokine ligand 11 [Source:RGD Symbol;Acc:3644]	3.34409	1.3286	2.39904	6.15745	3.9376	18.2383	0.249591	-2.00236	down
GO:0048020	CCR chemokine receptor binding	molecular_function	8	4.2497e-08	ENSRNOG00000015992	Ccl20	C-C motif chemokine ligand 20 [Source:RGD Symbol;Acc:3646]	3.55187	1.52624	2.52854	0.934769	1.07933	0.51172	3.01156	1.59051	up
GO:0048020	CCR chemokine receptor binding	molecular_function	8	4.2497e-08	ENSRNOG00000016278	Ccl17	C-C motif chemokine ligand 17 [Source:RGD Symbol;Acc:619924]	3.89019	6.53501	5.24364	1.31455	3.29401	1.16464	2.71406	1.44045	up
GO:0048020	CCR chemokine receptor binding	molecular_function	8	4.2497e-08	ENSRNOG00000016535	Ccl22	C-C motif chemokine ligand 22 [Source:RGD Symbol;Acc:619933]	0.579045	2.03706	1.27757	0.082517	0.590059	0.297163	4.01517	2.00546	up
GO:0048020	CCR chemokine receptor binding	molecular_function	8	4.2497e-08	ENSRNOG00000021851	Ccl1	C-C motif chemokine ligand 1 [Source:RGD Symbol;Acc:1586495]	1.29096	0.891293	0.828182	0.159979	0	0	18.8177	4.23402	up
GO:0048020	CCR chemokine receptor binding	molecular_function	8	4.2497e-08	ENSRNOG00000029768	Ccl12	chemokine (C-C motif) ligand 12 [Source:RGD Symbol;Acc:1309255]	6.0007	2.47451	2.57848	0	0.075135	0.603588	16.286	4.02556	up
GO:0048020	CCR chemokine receptor binding	molecular_function	8	4.2497e-08	ENSRNOG00000031162	Ccl24	C-C motif chemokine ligand 24 [Source:RGD Symbol;Acc:1310245]	5.13001	4.48235	6.31795	1.67853	1.29167	1.65069	3.44746	1.78553	up
GO:0048020	CCR chemokine receptor binding	molecular_function	8	4.2497e-08	ENSRNOG00000034290	Ccl21	C-C motif chemokine ligand 21 [Source:RGD Symbol;Acc:1311996]	171.913	158.057	123.877	70.7503	53.7025	41.4424	2.73575	1.45194	up
GO:0007155	cell adhesion	biological_process	4	5.89597e-08	ENSRNOG00000000597	Ccn6	cellular communication network factor 6 [Source:RGD Symbol;Acc:1564120]	0.035468	0.06511	0.023641	0.220389	0.283599	0.311317	0.152359	-2.71445	down
GO:0007155	cell adhesion	biological_process	4	5.89597e-08	ENSRNOG00000001333	Azgp1	alpha-2-glycoprotein 1, zinc-binding [Source:RGD Symbol;Acc:2187]	2.15601	1.76906	1.75567	5.41567	4.03726	4.44303	0.408805	-1.29052	down
GO:0007155	cell adhesion	biological_process	4	5.89597e-08	ENSRNOG00000002158	Ibsp	integrin-binding sialoprotein [Source:RGD Symbol;Acc:2855]	2.52661	2.01495	2.65804	0.518978	0.429105	0.498763	4.97606	2.315	up
GO:0007155	cell adhesion	biological_process	4	5.89597e-08	ENSRNOG00000002723	Sele	selectin E [Source:RGD Symbol;Acc:3654]	2.98187	1.19921	3.6168	0.289072	0.400788	0.3301	7.64528	2.93457	up
GO:0007155	cell adhesion	biological_process	4	5.89597e-08	ENSRNOG00000002776	Sell	selectin L [Source:RGD Symbol;Acc:3655]	4.08356	3.42413	3.10125	10.9568	7.5716	15.9543	0.30766	-1.70059	down
GO:0007155	cell adhesion	biological_process	4	5.89597e-08	ENSRNOG00000002794	Selp	selectin P [Source:RGD Symbol;Acc:3656]	3.596	2.43421	6.01392	1.27506	1.4035	1.324	3.0091	1.58933	up
GO:0007155	cell adhesion	biological_process	4	5.89597e-08	ENSRNOG00000003546	Tnfrsf12a	TNF receptor superfamily member 12A [Source:RGD Symbol;Acc:631329]	41.3385	35.8452	71.9517	14.1135	11.348	9.02931	4.32393	2.11234	up
GO:0007155	cell adhesion	biological_process	4	5.89597e-08	ENSRNOG00000003732	Flrt2	fibronectin leucine rich transmembrane protein 2 [Source:RGD Symbol;Acc:1308574]	5.80223	4.99289	14.0709	1.80281	2.04289	1.39731	4.74271	2.24571	up
GO:0007155	cell adhesion	biological_process	4	5.89597e-08	ENSRNOG00000003776	Amtn	amelotin [Source:RGD Symbol;Acc:1592356]	9.9121	8.17096	8.70068	2.53284	1.29441	2.48701	4.24178	2.08467	up
GO:0007155	cell adhesion	biological_process	4	5.89597e-08	ENSRNOG00000003929	Pcdh19	protocadherin 19 [Source:RGD Symbol;Acc:1565392]	1.1074	1.82213	1.00018	2.27102	3.07318	4.05547	0.418069	-1.25819	down
GO:0007155	cell adhesion	biological_process	4	5.89597e-08	ENSRNOG00000004438	Cntn1	contactin 1 [Source:RGD Symbol;Acc:621300]	0.603188	1.23802	0.584036	2.03437	2.22048	2.31847	0.368953	-1.43849	down
GO:0007155	cell adhesion	biological_process	4	5.89597e-08	ENSRNOG00000006569	Itgb8	integrin subunit beta 8 [Source:RGD Symbol;Acc:1311374]	2.69064	1.81036	3.42008	1.06221	1.22856	0.71459	2.63565	1.39816	up
GO:0007155	cell adhesion	biological_process	4	5.89597e-08	ENSRNOG00000006604	Thy1	Thy-1 cell surface antigen [Source:RGD Symbol;Acc:3860]	15.8972	8.453	8.31882	2.09459	3.60439	3.61669	3.50689	1.81019	up
GO:0007155	cell adhesion	biological_process	4	5.89597e-08	ENSRNOG00000006723	Itga11	integrin subunit alpha 11 [Source:RGD Symbol;Acc:1311711]	2.02577	0.948998	1.43154	0.445333	0.566447	0.898136	2.30707	1.20606	up
GO:0007155	cell adhesion	biological_process	4	5.89597e-08	ENSRNOG00000008749	Col5a1	collagen type V alpha 1 chain [Source:RGD Symbol;Acc:70920]	26.8905	21.3001	17.3892	7.63965	8.60063	7.95309	2.71065	1.43864	up
GO:0007155	cell adhesion	biological_process	4	5.89597e-08	ENSRNOG00000008816	Gpnmb	glycoprotein nmb [Source:RGD Symbol;Acc:71008]	364.08	375.726	301.379	194.008	146.217	143.748	2.15133	1.10523	up
GO:0007155	cell adhesion	biological_process	4	5.89597e-08	ENSRNOG00000008970	Pcdh17	protocadherin 17 [Source:RGD Symbol;Acc:1304753]	4.9088	7.17492	5.10665	1.79822	1.68239	3.28292	2.54163	1.34575	up
GO:0007155	cell adhesion	biological_process	4	5.89597e-08	ENSRNOG00000010263	Cldn11	claudin 11 [Source:RGD Symbol;Acc:71081]	9.74336	8.428	8.69926	2.68847	2.864	2.8561	3.19562	1.6761	up
GO:0007155	cell adhesion	biological_process	4	5.89597e-08	ENSRNOG00000010529	Thbs2	thrombospondin 2 [Source:RGD Symbol;Acc:1310979]	16.9175	9.7328	15.9974	0.842375	0.59486	0.649489	20.4376	4.35316	up
GO:0007155	cell adhesion	biological_process	4	5.89597e-08	ENSRNOG00000012216	Tgfbi	transforming growth factor, beta induced [Source:RGD Symbol;Acc:620017]	41.0144	25.3631	33.6917	15.6014	15.5471	14.7259	2.18138	1.12524	up
GO:0007155	cell adhesion	biological_process	4	5.89597e-08	ENSRNOG00000012307	Mybpc3	myosin binding protein C, cardiac [Source:RGD Symbol;Acc:1305950]	0.049032	0.067742	0.063231	0.968177	0.07676	0.44193	0.121063	-3.04617	down
GO:0007155	cell adhesion	biological_process	4	5.89597e-08	ENSRNOG00000012367	Pcdh7	protocadherin 7 [Source:RGD Symbol;Acc:1303209]	2.73789	2.8915	4.27544	0.812085	0.617343	0.767092	4.50933	2.17291	up
GO:0007155	cell adhesion	biological_process	4	5.89597e-08	ENSRNOG00000012660	Postn	periostin [Source:RGD Symbol;Acc:1305285]	317.385	321.176	267.696	117.573	99.7376	147.058	2.4872	1.31452	up
GO:0007155	cell adhesion	biological_process	4	5.89597e-08	ENSRNOG00000013481	Cdh11	cadherin 11 [Source:RGD Symbol;Acc:619742]	23.3785	20.9201	14.0615	9.11527	8.39271	4.83833	2.61162	1.38494	up
GO:0007155	cell adhesion	biological_process	4	5.89597e-08	ENSRNOG00000013850	Hes5	hes family bHLH transcription factor 5 [Source:RGD Symbol;Acc:621340]	0	0	0	0.366786	0.286635	0.493313	0.000261613	-11.9003	down
GO:0007155	cell adhesion	biological_process	4	5.89597e-08	ENSRNOG00000014288	Fn1	fibronectin 1 [Source:RGD Symbol;Acc:2624]	280.945	248.379	229.735	57.4707	64.5711	77.3481	3.80691	1.92862	up
GO:0007155	cell adhesion	biological_process	4	5.89597e-08	ENSRNOG00000014751	Ret	ret proto-oncogene [Source:RGD Symbol;Acc:3556]	2.67711	3.95788	2.72819	6.89043	7.6607	6.25602	0.449998	-1.15201	down
GO:0007155	cell adhesion	biological_process	4	5.89597e-08	ENSRNOG00000015036	Ccn2	cellular communication network factor 2 [Source:RGD Symbol;Acc:621392]	218.744	343.767	345.238	124.994	151.721	144.012	2.15757	1.10941	up
GO:0007155	cell adhesion	biological_process	4	5.89597e-08	ENSRNOG00000015562	Cdh17	cadherin 17 [Source:RGD Symbol;Acc:619748]	1.36051	1.62806	1.03261	0.423343	0.744103	0.576678	2.30556	1.20512	up
GO:0007155	cell adhesion	biological_process	4	5.89597e-08	ENSRNOG00000016502	Dscaml1	DS cell adhesion molecule-like 1 [Source:RGD Symbol;Acc:1304887]	0.157647	0.165506	0.050334	0.213268	0.420508	0.457436	0.342268	-1.5468	down
GO:0007155	cell adhesion	biological_process	4	5.89597e-08	ENSRNOG00000016587	Ninj1	ninjurin 1 [Source:RGD Symbol;Acc:3179]	63.3265	48.6124	53.9727	28.5	27.2451	25.7324	2.03629	1.02594	up
GO:0007155	cell adhesion	biological_process	4	5.89597e-08	ENSRNOG00000017237	Lama1	laminin subunit alpha 1 [Source:RGD Symbol;Acc:1307207]	0.012656	0.0023	0.040977	0	0	0	186.443	7.54259	up
GO:0007155	cell adhesion	biological_process	4	5.89597e-08	ENSRNOG00000018870	Hapln2	hyaluronan and proteoglycan link protein 2 [Source:RGD Symbol;Acc:621854]	0.057624	0.072877	0.098207	0.730127	0.617234	0.403329	0.130639	-2.93634	down
GO:0007155	cell adhesion	biological_process	4	5.89597e-08	ENSRNOG00000019445	Msln	mesothelin [Source:RGD Symbol;Acc:69333]	152.008	110.629	159.538	55.1951	30.864	26.1269	3.76317	1.91195	up
GO:0007155	cell adhesion	biological_process	4	5.89597e-08	ENSRNOG00000023030	Cd96	CD96 molecule [Source:RGD Symbol;Acc:1565249]	0.917836	1.14257	0.850143	2.44321	4.01199	2.42128	0.327894	-1.6087	down
GO:0007155	cell adhesion	biological_process	4	5.89597e-08	ENSRNOG00000026604	Cercam	cerebral endothelial cell adhesion molecule [Source:RGD Symbol;Acc:1304778]	5.39749	3.31864	2.98499	1.90812	2.10981	1.12008	2.27736	1.18736	up
GO:0007155	cell adhesion	biological_process	4	5.89597e-08	ENSRNOG00000026902	Lyve1	lymphatic vessel endothelial hyaluronan receptor 1 [Source:RGD Symbol;Acc:1310864]	31.7248	32.3343	28.9423	85.5271	72.2486	105.709	0.352967	-1.50239	down
GO:0007155	cell adhesion	biological_process	4	5.89597e-08	ENSRNOG00000027232	Pcdhga11	protocadherin gamma subfamily A, 11 [Source:MGI Symbol;Acc:MGI:1935228]	0.300315	0.542542	0.551657	0.787219	1.01469	1.04364	0.490067	-1.02895	down
GO:0007155	cell adhesion	biological_process	4	5.89597e-08	ENSRNOG00000027253	Pcdhga10	protocadherin gamma subfamily A, 10 [Source:MGI Symbol;Acc:MGI:1935227]	1.08135	1.17897	0.689058	1.67217	2.19958	2.22987	0.483377	-1.04878	down
GO:0007155	cell adhesion	biological_process	4	5.89597e-08	ENSRNOG00000029212	Vcan	versican [Source:RGD Symbol;Acc:619940]	6.90148	5.362	6.00161	1.03357	1.05354	0.986211	5.94312	2.57122	up
GO:0007155	cell adhesion	biological_process	4	5.89597e-08	ENSRNOG00000031475	Col16a1	collagen type XVI alpha 1 chain [Source:RGD Symbol;Acc:1310982]	57.2427	51.0177	56.7959	19.2783	19.235	17.3131	2.9566	1.56394	up
GO:0007155	cell adhesion	biological_process	4	5.89597e-08	ENSRNOG00000031890	Ncam1	neural cell adhesion molecule 1 [Source:RGD Symbol;Acc:67378]	1.037	0.705121	0.814697	0.302133	0.414242	0.372198	2.34878	1.23191	up
GO:0007155	cell adhesion	biological_process	4	5.89597e-08	ENSRNOG00000032699	Ttyh1	tweety family member 1 [Source:RGD Symbol;Acc:1310103]	0.26216	0.287879	0.123177	0.450375	0.597256	0.514098	0.431071	-1.214	down
GO:0007155	cell adhesion	biological_process	4	5.89597e-08	ENSRNOG00000033087	Cdh23	cadherin 23 (otocadherin) [Source:MGI Symbol;Acc:MGI:1890219]	0.141031	0.164882	0.211425	0.318243	0.551942	0.385107	0.412126	-1.27884	down
GO:0007155	cell adhesion	biological_process	4	5.89597e-08	ENSRNOG00000033837	Cdh9	cadherin 9 [Source:RGD Symbol;Acc:1308343]	0.037874	0	0.027494	0.151011	0.255395	0.117604	0.124746	-3.00294	down
GO:0007155	cell adhesion	biological_process	4	5.89597e-08	ENSRNOG00000039197	LOC108348074	collagen alpha-1(XV) chain-like [Source:RGD Symbol;Acc:11464459]	12.5283	18.8748	22.1478	2.9943	2.28433	4.771	5.32864	2.41377	up
GO:0007155	cell adhesion	biological_process	4	5.89597e-08	ENSRNOG00000043451	Spp1	secreted phosphoprotein 1 [Source:RGD Symbol;Acc:3752]	129.555	106.043	88.3967	9.8296	1.21233	1.83191	25.1669	4.65346	up
GO:0007155	cell adhesion	biological_process	4	5.89597e-08	ENSRNOG00000045829	Thbs1	thrombospondin 1 [Source:RGD Symbol;Acc:1588455]	69.4641	106.372	164.303	19.9347	19.858	26.7682	5.11019	2.35338	up
GO:0007155	cell adhesion	biological_process	4	5.89597e-08	ENSRNOG00000046264	Pcdhb7	protocadherin beta 7 [Source:RGD Symbol;Acc:1309422]	1.23071	1.4461	0.622516	0.490801	0.423793	0.650195	2.10848	1.0762	up
GO:0007155	cell adhesion	biological_process	4	5.89597e-08	ENSRNOG00000047174	Pcdha4	protocadherin alpha 4 [Source:RGD Symbol;Acc:620337]	0.886611	1.47262	1.28061	0.561244	0.492371	0.567795	2.24486	1.16663	up
GO:0007155	cell adhesion	biological_process	4	5.89597e-08	ENSRNOG00000050539	Fbln5	fibulin 5 [Source:RGD Symbol;Acc:2594]	75.8039	91.3075	58.3569	25.7062	25.9353	36.1296	2.56882	1.36111	up
GO:0007155	cell adhesion	biological_process	4	5.89597e-08	ENSRNOG00000050792	Tnfaip6	TNF alpha induced protein 6 [Source:RGD Symbol;Acc:621359]	2.6902	3.14756	4.01953	0.746881	0.432981	0.513021	5.82278	2.54171	up
GO:0007155	cell adhesion	biological_process	4	5.89597e-08	ENSRNOG00000058111	Itga2	integrin subunit alpha 2 [Source:RGD Symbol;Acc:621632]	2.02287	2.41017	1.73864	0.541871	0.886078	0.645843	2.97604	1.57339	up
GO:0007155	cell adhesion	biological_process	4	5.89597e-08	ENSRNOG00000058645	Tnc	tenascin C [Source:RGD Symbol;Acc:621057]	32.8819	24.6221	38.6851	6.23045	5.06284	5.64608	5.67843	2.50549	up
GO:0007155	cell adhesion	biological_process	4	5.89597e-08	ENSRNOG00000060381	Col15a1	collagen type XV alpha 1 chain [Source:RGD Symbol;Acc:1310820]	21.3702	31.2652	30.8648	2.72355	3.70059	6.38776	6.51739	2.70429	up
GO:0071347	cellular response to interleukin-1	biological_process	8	1.01159e-07	ENSRNOG00000000239	Ccl7	C-C motif chemokine ligand 7 [Source:RGD Symbol;Acc:1359152]	14.4232	11.1589	18.1968	0.946133	0.831492	2.17106	11.087	3.47079	up
GO:0071347	cellular response to interleukin-1	biological_process	8	1.01159e-07	ENSRNOG00000002607	Sox9	SRY box 9 [Source:RGD Symbol;Acc:620474]	0.120299	0.141518	0.108652	0.275685	0.369276	0.760508	0.263591	-1.92363	down
GO:0071347	cellular response to interleukin-1	biological_process	8	1.01159e-07	ENSRNOG00000004854	Has2	hyaluronan synthase 2 [Source:RGD Symbol;Acc:2781]	0.632455	0.404069	0.485014	0.097024	0.031942	0.012871	10.7274	3.42322	up
GO:0071347	cellular response to interleukin-1	biological_process	8	1.01159e-07	ENSRNOG00000007159	Ccl2	C-C motif chemokine ligand 2 [Source:RGD Symbol;Acc:3645]	37.7066	18.9936	41.8423	1.20024	1.4775	2.90705	17.6448	4.14117	up
GO:0071347	cellular response to interleukin-1	biological_process	8	1.01159e-07	ENSRNOG00000007335	Ccl11	C-C motif chemokine ligand 11 [Source:RGD Symbol;Acc:3644]	3.34409	1.3286	2.39904	6.15745	3.9376	18.2383	0.249591	-2.00236	down
GO:0071347	cellular response to interleukin-1	biological_process	8	1.01159e-07	ENSRNOG00000009329	Nr1d1	nuclear receptor subfamily 1, group D, member 1 [Source:RGD Symbol;Acc:628827]	13.6014	12.8632	4.00937	37.3731	44.8594	63.3978	0.209256	-2.25666	down
GO:0071347	cellular response to interleukin-1	biological_process	8	1.01159e-07	ENSRNOG00000010278	Il6	interleukin 6 [Source:RGD Symbol;Acc:2901]	3.16485	2.11915	11.0231	0.116354	0.115796	0.224046	35.7458	5.1597	up
GO:0071347	cellular response to interleukin-1	biological_process	8	1.01159e-07	ENSRNOG00000010906	Ccl5	C-C motif chemokine ligand 5 [Source:RGD Symbol;Acc:69069]	33.6073	45.533	17.0812	161.621	269.977	147.801	0.166071	-2.59013	down
GO:0071347	cellular response to interleukin-1	biological_process	8	1.01159e-07	ENSRNOG00000013973	Lcn2	lipocalin 2 [Source:RGD Symbol;Acc:69408]	1594.83	895.005	2315.86	265.381	192.039	198.689	7.32455	2.87274	up
GO:0071347	cellular response to interleukin-1	biological_process	8	1.01159e-07	ENSRNOG00000015858	Hyal1	hyaluronidase 1 [Source:RGD Symbol;Acc:1303060]	13.1911	9.38187	9.33985	18.5813	21.0105	34.4394	0.431072	-1.214	down
GO:0071347	cellular response to interleukin-1	biological_process	8	1.01159e-07	ENSRNOG00000015992	Ccl20	C-C motif chemokine ligand 20 [Source:RGD Symbol;Acc:3646]	3.55187	1.52624	2.52854	0.934769	1.07933	0.51172	3.01156	1.59051	up
GO:0071347	cellular response to interleukin-1	biological_process	8	1.01159e-07	ENSRNOG00000016278	Ccl17	C-C motif chemokine ligand 17 [Source:RGD Symbol;Acc:619924]	3.89019	6.53501	5.24364	1.31455	3.29401	1.16464	2.71406	1.44045	up
GO:0071347	cellular response to interleukin-1	biological_process	8	1.01159e-07	ENSRNOG00000016535	Ccl22	C-C motif chemokine ligand 22 [Source:RGD Symbol;Acc:619933]	0.579045	2.03706	1.27757	0.082517	0.590059	0.297163	4.01517	2.00546	up
GO:0071347	cellular response to interleukin-1	biological_process	8	1.01159e-07	ENSRNOG00000018598	Ankrd1	ankyrin repeat domain 1 [Source:RGD Symbol;Acc:61989]	107.023	107.496	209.618	18.6489	16.2713	32.2265	6.31656	2.65914	up
GO:0071347	cellular response to interleukin-1	biological_process	8	1.01159e-07	ENSRNOG00000018865	Adamts12	ADAM metallopeptidase with thrombospondin type 1 motif, 12 [Source:RGD Symbol;Acc:1307323]	4.73114	7.17003	4.91418	1.22778	1.39158	1.85944	3.75443	1.90859	up
GO:0071347	cellular response to interleukin-1	biological_process	8	1.01159e-07	ENSRNOG00000020733	Camp	cathelicidin antimicrobial peptide [Source:RGD Symbol;Acc:1559878]	1.35987	0.998778	1.40631	2.74325	2.92398	3.19669	0.42475	-1.23531	down
GO:0071347	cellular response to interleukin-1	biological_process	8	1.01159e-07	ENSRNOG00000021851	Ccl1	C-C motif chemokine ligand 1 [Source:RGD Symbol;Acc:1586495]	1.29096	0.891293	0.828182	0.159979	0	0	18.8177	4.23402	up
GO:0071347	cellular response to interleukin-1	biological_process	8	1.01159e-07	ENSRNOG00000029768	Ccl12	chemokine (C-C motif) ligand 12 [Source:RGD Symbol;Acc:1309255]	6.0007	2.47451	2.57848	0	0.075135	0.603588	16.286	4.02556	up
GO:0071347	cellular response to interleukin-1	biological_process	8	1.01159e-07	ENSRNOG00000031162	Ccl24	C-C motif chemokine ligand 24 [Source:RGD Symbol;Acc:1310245]	5.13001	4.48235	6.31795	1.67853	1.29167	1.65069	3.44746	1.78553	up
GO:0071347	cellular response to interleukin-1	biological_process	8	1.01159e-07	ENSRNOG00000034290	Ccl21	C-C motif chemokine ligand 21 [Source:RGD Symbol;Acc:1311996]	171.913	158.057	123.877	70.7503	53.7025	41.4424	2.73575	1.45194	up
GO:0071347	cellular response to interleukin-1	biological_process	8	1.01159e-07	ENSRNOG00000053272	Chi3l1	chitinase 3 like 1 [Source:RGD Symbol;Acc:620874]	187.923	110.593	195.544	69.2241	52.2938	54.6498	2.80449	1.48774	up
GO:0048247	lymphocyte chemotaxis	biological_process	6	1.079e-07	ENSRNOG00000000239	Ccl7	C-C motif chemokine ligand 7 [Source:RGD Symbol;Acc:1359152]	14.4232	11.1589	18.1968	0.946133	0.831492	2.17106	11.087	3.47079	up
GO:0048247	lymphocyte chemotaxis	biological_process	6	1.079e-07	ENSRNOG00000007159	Ccl2	C-C motif chemokine ligand 2 [Source:RGD Symbol;Acc:3645]	37.7066	18.9936	41.8423	1.20024	1.4775	2.90705	17.6448	4.14117	up
GO:0048247	lymphocyte chemotaxis	biological_process	6	1.079e-07	ENSRNOG00000007335	Ccl11	C-C motif chemokine ligand 11 [Source:RGD Symbol;Acc:3644]	3.34409	1.3286	2.39904	6.15745	3.9376	18.2383	0.249591	-2.00236	down
GO:0048247	lymphocyte chemotaxis	biological_process	6	1.079e-07	ENSRNOG00000015992	Ccl20	C-C motif chemokine ligand 20 [Source:RGD Symbol;Acc:3646]	3.55187	1.52624	2.52854	0.934769	1.07933	0.51172	3.01156	1.59051	up
GO:0048247	lymphocyte chemotaxis	biological_process	6	1.079e-07	ENSRNOG00000016278	Ccl17	C-C motif chemokine ligand 17 [Source:RGD Symbol;Acc:619924]	3.89019	6.53501	5.24364	1.31455	3.29401	1.16464	2.71406	1.44045	up
GO:0048247	lymphocyte chemotaxis	biological_process	6	1.079e-07	ENSRNOG00000016535	Ccl22	C-C motif chemokine ligand 22 [Source:RGD Symbol;Acc:619933]	0.579045	2.03706	1.27757	0.082517	0.590059	0.297163	4.01517	2.00546	up
GO:0048247	lymphocyte chemotaxis	biological_process	6	1.079e-07	ENSRNOG00000021851	Ccl1	C-C motif chemokine ligand 1 [Source:RGD Symbol;Acc:1586495]	1.29096	0.891293	0.828182	0.159979	0	0	18.8177	4.23402	up
GO:0048247	lymphocyte chemotaxis	biological_process	6	1.079e-07	ENSRNOG00000029768	Ccl12	chemokine (C-C motif) ligand 12 [Source:RGD Symbol;Acc:1309255]	6.0007	2.47451	2.57848	0	0.075135	0.603588	16.286	4.02556	up
GO:0048247	lymphocyte chemotaxis	biological_process	6	1.079e-07	ENSRNOG00000031162	Ccl24	C-C motif chemokine ligand 24 [Source:RGD Symbol;Acc:1310245]	5.13001	4.48235	6.31795	1.67853	1.29167	1.65069	3.44746	1.78553	up
GO:0048247	lymphocyte chemotaxis	biological_process	6	1.079e-07	ENSRNOG00000034290	Ccl21	C-C motif chemokine ligand 21 [Source:RGD Symbol;Acc:1311996]	171.913	158.057	123.877	70.7503	53.7025	41.4424	2.73575	1.45194	up
GO:0048247	lymphocyte chemotaxis	biological_process	6	1.079e-07	ENSRNOG00000043342	LOC290595	hypothetical gene supported by AF152002 [Source:RGD Symbol;Acc:1566160]	0.495846	0.709836	0	0.873931	12.6402	1.47192	0.0804534	-3.6357	down
GO:0007059	chromosome segregation	biological_process	4	1.27302e-07	ENSRNOG00000003388	Cenpf	centromere protein F [Source:RGD Symbol;Acc:628667]	1.94174	2.03426	1.96379	0.832697	0.856453	0.770449	2.41495	1.27199	up
GO:0007059	chromosome segregation	biological_process	4	1.27302e-07	ENSRNOG00000003802	Pttg1	PTTG1 regulator of sister chromatid separation, securin [Source:RGD Symbol;Acc:68359]	4.7681	5.24809	6.20749	0.786092	2.20623	1.23079	3.84164	1.94172	up
GO:0007059	chromosome segregation	biological_process	4	1.27302e-07	ENSRNOG00000004487	Nek2	NIMA (never in mitosis gene a)-related kinase 2-like 1 [Source:RGD Symbol;Acc:1582899]	2.85366	3.16456	2.90233	0.377855	1.12901	1.14309	3.36631	1.75117	up
GO:0007059	chromosome segregation	biological_process	4	1.27302e-07	ENSRNOG00000005637	Usp44	ubiquitin specific peptidase 44 [Source:RGD Symbol;Acc:1308216]	0.122586	0.199211	0.082925	0.61892	0.833961	0.888159	0.172881	-2.53215	down
GO:0007059	chromosome segregation	biological_process	4	1.27302e-07	ENSRNOG00000006731	Spc25	SPC25 component of NDC80 kinetochore complex [Source:RGD Symbol;Acc:1307811]	5.48846	4.99486	4.62358	2.3222	2.3257	2.49192	2.11587	1.08125	up
GO:0007059	chromosome segregation	biological_process	4	1.27302e-07	ENSRNOG00000009334	Knstrn	kinetochore-localized astrin/SPAG5 binding protein [Source:RGD Symbol;Acc:1303240]	4.35631	3.76269	4.622	0.968522	1.7877	1.13465	3.27458	1.71131	up
GO:0007059	chromosome segregation	biological_process	4	1.27302e-07	ENSRNOG00000009339	Cenpe	centromere protein E [Source:RGD Symbol;Acc:1307115]	1.70505	1.63012	1.94618	0.340447	0.834865	0.456197	3.2371	1.6947	up
GO:0007059	chromosome segregation	biological_process	4	1.27302e-07	ENSRNOG00000010897	Nek6	NIMA-related kinase 6 [Source:RGD Symbol;Acc:727779]	24.6017	20.4795	24.2431	12.3838	8.64512	8.77541	2.32598	1.21784	up
GO:0007059	chromosome segregation	biological_process	4	1.27302e-07	ENSRNOG00000012835	Espl1	extra spindle pole bodies like 1, separase [Source:RGD Symbol;Acc:1306266]	1.25076	1.06367	1.61809	0.50097	0.851101	0.511543	2.11016	1.07735	up
GO:0007059	chromosome segregation	biological_process	4	1.27302e-07	ENSRNOG00000013727	Ndc80	NDC80 kinetochore complex component [Source:RGD Symbol;Acc:1310154]	2.56795	2.18747	2.84611	0.826093	1.22329	1.01761	2.4785	1.30946	up
GO:0007059	chromosome segregation	biological_process	4	1.27302e-07	ENSRNOG00000015275	Ska1	spindle and kinetochore associated complex subunit 1 [Source:RGD Symbol;Acc:1310784]	0.959011	1.25199	1.15433	0.189139	0.335137	0.269773	4.23819	2.08345	up
GO:0007059	chromosome segregation	biological_process	4	1.27302e-07	ENSRNOG00000015921	Esco2	establishment of sister chromatid cohesion N-acetyltransferase 2 [Source:RGD Symbol;Acc:1593313]	1.45483	1.73478	1.79579	0.577857	0.736729	0.562654	2.6557	1.40909	up
GO:0007059	chromosome segregation	biological_process	4	1.27302e-07	ENSRNOG00000019620	Pmf1	polyamine-modulated factor 1 [Source:RGD Symbol;Acc:1584694]	10.5362	10.8429	10.3439	5.08124	5.3022	4.93598	2.07077	1.05017	up
GO:0007059	chromosome segregation	biological_process	4	1.27302e-07	ENSRNOG00000024178	Cenpt	centromere protein T [Source:RGD Symbol;Acc:1309383]	2.15047	2.86883	2.78762	0.86109	1.29611	1.35946	2.21998	1.15055	up
GO:0007059	chromosome segregation	biological_process	4	1.27302e-07	ENSRNOG00000029055	Ttk	Ttk protein kinase [Source:RGD Symbol;Acc:1305558]	1.76797	1.98793	2.07074	0.584657	0.640686	0.550555	3.28096	1.71412	up
GO:0007059	chromosome segregation	biological_process	4	1.27302e-07	ENSRNOG00000042944	Cenpw	centromere protein W [Source:RGD Symbol;Acc:1593465]	2.25586	2.53821	3.03228	0.652178	0.431898	0.267371	5.79109	2.53384	up
GO:0007059	chromosome segregation	biological_process	4	1.27302e-07	ENSRNOG00000053047	Top2a	DNA topoisomerase II alpha [Source:RGD Symbol;Acc:62048]	8.73574	8.81422	9.96956	2.39758	3.95071	3.50077	2.79412	1.4824	up
GO:0007059	chromosome segregation	biological_process	4	1.27302e-07	ENSRNOG00000057458	Oip5	Opa interacting protein 5 [Source:RGD Symbol;Acc:1564263]	1.41063	0.76808	1.12648	0.315477	0.53307	0.187426	3.19042	1.67375	up
GO:0070098	chemokine-mediated signaling pathway	biological_process	7	3.97949e-07	ENSRNOG00000000239	Ccl7	C-C motif chemokine ligand 7 [Source:RGD Symbol;Acc:1359152]	14.4232	11.1589	18.1968	0.946133	0.831492	2.17106	11.087	3.47079	up
GO:0070098	chemokine-mediated signaling pathway	biological_process	7	3.97949e-07	ENSRNOG00000006311	Ccr9	C-C motif chemokine receptor 9 [Source:RGD Symbol;Acc:628750]	0.257415	0.243861	0.157072	0.830937	1.15195	0.453854	0.270175	-1.88803	down
GO:0070098	chemokine-mediated signaling pathway	biological_process	7	3.97949e-07	ENSRNOG00000006620	Xcr1	X-C motif chemokine receptor 1 [Source:RGD Symbol;Acc:1311480]	1.18516	1.08826	0.853155	0.531912	0.487721	0.484413	2.07878	1.05573	up
GO:0070098	chemokine-mediated signaling pathway	biological_process	7	3.97949e-07	ENSRNOG00000006736	Ccr3	C-C motif chemokine receptor 3 [Source:RGD Symbol;Acc:620593]	0.551225	0.302268	0.337885	1.23779	0.699775	0.888156	0.421619	-1.24599	down
GO:0070098	chemokine-mediated signaling pathway	biological_process	7	3.97949e-07	ENSRNOG00000007159	Ccl2	C-C motif chemokine ligand 2 [Source:RGD Symbol;Acc:3645]	37.7066	18.9936	41.8423	1.20024	1.4775	2.90705	17.6448	4.14117	up
GO:0070098	chemokine-mediated signaling pathway	biological_process	7	3.97949e-07	ENSRNOG00000007335	Ccl11	C-C motif chemokine ligand 11 [Source:RGD Symbol;Acc:3644]	3.34409	1.3286	2.39904	6.15745	3.9376	18.2383	0.249591	-2.00236	down
GO:0070098	chemokine-mediated signaling pathway	biological_process	7	3.97949e-07	ENSRNOG00000010906	Ccl5	C-C motif chemokine ligand 5 [Source:RGD Symbol;Acc:69069]	33.6073	45.533	17.0812	161.621	269.977	147.801	0.166071	-2.59013	down
GO:0070098	chemokine-mediated signaling pathway	biological_process	7	3.97949e-07	ENSRNOG00000011478	Ackr4	atypical chemokine receptor 4 [Source:RGD Symbol;Acc:1596453]	3.742	6.72369	4.6503	10.6668	9.95579	14.6032	0.429117	-1.22056	down
GO:0070098	chemokine-mediated signaling pathway	biological_process	7	3.97949e-07	ENSRNOG00000014269	Cxcr2	C-X-C motif chemokine receptor 2 [Source:RGD Symbol;Acc:2906]	2.28515	1.28783	1.53123	4.02702	2.16233	5.47115	0.437735	-1.19187	down
GO:0070098	chemokine-mediated signaling pathway	biological_process	7	3.97949e-07	ENSRNOG00000015992	Ccl20	C-C motif chemokine ligand 20 [Source:RGD Symbol;Acc:3646]	3.55187	1.52624	2.52854	0.934769	1.07933	0.51172	3.01156	1.59051	up
GO:0070098	chemokine-mediated signaling pathway	biological_process	7	3.97949e-07	ENSRNOG00000016278	Ccl17	C-C motif chemokine ligand 17 [Source:RGD Symbol;Acc:619924]	3.89019	6.53501	5.24364	1.31455	3.29401	1.16464	2.71406	1.44045	up
GO:0070098	chemokine-mediated signaling pathway	biological_process	7	3.97949e-07	ENSRNOG00000016535	Ccl22	C-C motif chemokine ligand 22 [Source:RGD Symbol;Acc:619933]	0.579045	2.03706	1.27757	0.082517	0.590059	0.297163	4.01517	2.00546	up
GO:0070098	chemokine-mediated signaling pathway	biological_process	7	3.97949e-07	ENSRNOG00000021851	Ccl1	C-C motif chemokine ligand 1 [Source:RGD Symbol;Acc:1586495]	1.29096	0.891293	0.828182	0.159979	0	0	18.8177	4.23402	up
GO:0070098	chemokine-mediated signaling pathway	biological_process	7	3.97949e-07	ENSRNOG00000022298	Cxcl11	C-X-C motif chemokine ligand 11 [Source:RGD Symbol;Acc:727827]	0.612395	0.600572	0.531235	0.05833	0.123484	0.076764	6.74536	2.7539	up
GO:0070098	chemokine-mediated signaling pathway	biological_process	7	3.97949e-07	ENSRNOG00000029768	Ccl12	chemokine (C-C motif) ligand 12 [Source:RGD Symbol;Acc:1309255]	6.0007	2.47451	2.57848	0	0.075135	0.603588	16.286	4.02556	up
GO:0070098	chemokine-mediated signaling pathway	biological_process	7	3.97949e-07	ENSRNOG00000031162	Ccl24	C-C motif chemokine ligand 24 [Source:RGD Symbol;Acc:1310245]	5.13001	4.48235	6.31795	1.67853	1.29167	1.65069	3.44746	1.78553	up
GO:0070098	chemokine-mediated signaling pathway	biological_process	7	3.97949e-07	ENSRNOG00000034290	Ccl21	C-C motif chemokine ligand 21 [Source:RGD Symbol;Acc:1311996]	171.913	158.057	123.877	70.7503	53.7025	41.4424	2.73575	1.45194	up
GO:0008201	heparin binding	molecular_function	6	4.42758e-07	ENSRNOG00000000239	Ccl7	C-C motif chemokine ligand 7 [Source:RGD Symbol;Acc:1359152]	14.4232	11.1589	18.1968	0.946133	0.831492	2.17106	11.087	3.47079	up
GO:0008201	heparin binding	molecular_function	6	4.42758e-07	ENSRNOG00000000597	Ccn6	cellular communication network factor 6 [Source:RGD Symbol;Acc:1564120]	0.035468	0.06511	0.023641	0.220389	0.283599	0.311317	0.152359	-2.71445	down
GO:0008201	heparin binding	molecular_function	6	4.42758e-07	ENSRNOG00000001750	Chrd	chordin [Source:RGD Symbol;Acc:620181]	2.98953	2.01903	3.44486	1.74957	1.20295	1.00158	2.13788	1.09618	up
GO:0008201	heparin binding	molecular_function	6	4.42758e-07	ENSRNOG00000001865	Serpind1	serpin family D member 1 [Source:RGD Symbol;Acc:619854]	0.383391	0.380855	0.640925	2.14881	1.43236	1.31009	0.287282	-1.79946	down
GO:0008201	heparin binding	molecular_function	6	4.42758e-07	ENSRNOG00000002052	Ccdc80	coiled-coil domain containing 80 [Source:RGD Symbol;Acc:69421]	75.5538	48.2748	95.7677	28.6002	19.8306	18.9171	3.26063	1.70515	up
GO:0008201	heparin binding	molecular_function	6	4.42758e-07	ENSRNOG00000002093	Tgfbr3	transforming growth factor beta receptor 3 [Source:RGD Symbol;Acc:61821]	13.1989	16.2618	13.9274	33.5314	35.2539	39.6688	0.400058	-1.32172	down
GO:0008201	heparin binding	molecular_function	6	4.42758e-07	ENSRNOG00000002746	Fstl1	follistatin-like 1 [Source:RGD Symbol;Acc:68955]	76.3812	73.9106	69.2725	28.1826	25.0882	37.0014	2.43224	1.28229	up
GO:0008201	heparin binding	molecular_function	6	4.42758e-07	ENSRNOG00000002794	Selp	selectin P [Source:RGD Symbol;Acc:3656]	3.596	2.43421	6.01392	1.27506	1.4035	1.324	3.0091	1.58933	up
GO:0008201	heparin binding	molecular_function	6	4.42758e-07	ENSRNOG00000004540	Clec3b	C-type lectin domain family 3, member B [Source:RGD Symbol;Acc:1311031]	120.517	107.673	87.2039	42.8811	43.4075	48.0254	2.34818	1.23154	up
GO:0008201	heparin binding	molecular_function	6	4.42758e-07	ENSRNOG00000007159	Ccl2	C-C motif chemokine ligand 2 [Source:RGD Symbol;Acc:3645]	37.7066	18.9936	41.8423	1.20024	1.4775	2.90705	17.6448	4.14117	up
GO:0008201	heparin binding	molecular_function	6	4.42758e-07	ENSRNOG00000007302	Fbn1	fibrillin 1 [Source:RGD Symbol;Acc:620908]	30.0541	29.7677	24.9997	8.20277	8.09057	8.42094	3.43208	1.77909	up
GO:0008201	heparin binding	molecular_function	6	4.42758e-07	ENSRNOG00000008310	Mpo	myeloperoxidase [Source:RGD Symbol;Acc:1592081]	0.0178849	0	0.0336242	0.108739	0.193909	0.202207	0.102027	-3.29297	down
GO:0008201	heparin binding	molecular_function	6	4.42758e-07	ENSRNOG00000008749	Col5a1	collagen type V alpha 1 chain [Source:RGD Symbol;Acc:70920]	26.8905	21.3001	17.3892	7.63965	8.60063	7.95309	2.71065	1.43864	up
GO:0008201	heparin binding	molecular_function	6	4.42758e-07	ENSRNOG00000008816	Gpnmb	glycoprotein nmb [Source:RGD Symbol;Acc:71008]	364.08	375.726	301.379	194.008	146.217	143.748	2.15133	1.10523	up
GO:0008201	heparin binding	molecular_function	6	4.42758e-07	ENSRNOG00000011946	Ptn	pleiotrophin [Source:RGD Symbol;Acc:3444]	7.08411	4.9815	4.90333	1.78003	1.39043	2.30363	3.09986	1.63221	up
GO:0008201	heparin binding	molecular_function	6	4.42758e-07	ENSRNOG00000012660	Postn	periostin [Source:RGD Symbol;Acc:1305285]	317.385	321.176	267.696	117.573	99.7376	147.058	2.4872	1.31452	up
GO:0008201	heparin binding	molecular_function	6	4.42758e-07	ENSRNOG00000015036	Ccn2	cellular communication network factor 2 [Source:RGD Symbol;Acc:621392]	218.744	343.767	345.238	124.994	151.721	144.012	2.15757	1.10941	up
GO:0008201	heparin binding	molecular_function	6	4.42758e-07	ENSRNOG00000015461	Serpine2	serpin family E member 2 [Source:RGD Symbol;Acc:3748]	61.0568	43.5868	59.6911	18.6343	15.2167	14.1918	3.42059	1.77424	up
GO:0008201	heparin binding	molecular_function	6	4.42758e-07	ENSRNOG00000020525	Col5a3	collagen type V alpha 3 chain [Source:RGD Symbol;Acc:70922]	6.27947	4.20125	3.33351	1.45791	1.15799	1.30957	3.51913	1.81522	up
GO:0008201	heparin binding	molecular_function	6	4.42758e-07	ENSRNOG00000021294	Mstn	myostatin [Source:RGD Symbol;Acc:3115]	0.239236	0.420771	0.61312	0	0	0	4243.76	12.0511	up
GO:0008201	heparin binding	molecular_function	6	4.42758e-07	ENSRNOG00000022298	Cxcl11	C-X-C motif chemokine ligand 11 [Source:RGD Symbol;Acc:727827]	0.612395	0.600572	0.531235	0.05833	0.123484	0.076764	6.74536	2.7539	up
GO:0008201	heparin binding	molecular_function	6	4.42758e-07	ENSRNOG00000023148	Col11a1	collagen type XI alpha 1 chain [Source:RGD Symbol;Acc:2372]	2.43824	0.601978	0.83106	0.137976	0.134476	0.179405	8.56748	3.09887	up
GO:0008201	heparin binding	molecular_function	6	4.42758e-07	ENSRNOG00000025001	Pcolce	procollagen C-endopeptidase enhancer [Source:RGD Symbol;Acc:3270]	91.1937	57.8994	71.8722	22.2554	16.594	23.1289	3.5652	1.83398	up
GO:0008201	heparin binding	molecular_function	6	4.42758e-07	ENSRNOG00000031475	Col16a1	collagen type XVI alpha 1 chain [Source:RGD Symbol;Acc:1310982]	57.2427	51.0177	56.7959	19.2783	19.235	17.3131	2.9566	1.56394	up
GO:0008201	heparin binding	molecular_function	6	4.42758e-07	ENSRNOG00000045829	Thbs1	thrombospondin 1 [Source:RGD Symbol;Acc:1588455]	69.4641	106.372	164.303	19.9347	19.858	26.7682	5.11019	2.35338	up
GO:0008201	heparin binding	molecular_function	6	4.42758e-07	ENSRNOG00000046848	PCOLCE2	procollagen C-endopeptidase enhancer 2 [Source:RGD Symbol;Acc:1595195]	5.81048	6.81291	4.70162	20.8649	18.564	20.1305	0.290887	-1.78147	down
GO:0008217	regulation of blood pressure	biological_process	5	6.0158e-07	ENSRNOG00000002525	Ptgs2	prostaglandin-endoperoxide synthase 2 [Source:RGD Symbol;Acc:620349]	1.16561	3.47891	3.42764	1.65163	1.08205	1.05589	2.1301	1.09092	up
GO:0008217	regulation of blood pressure	biological_process	5	6.0158e-07	ENSRNOG00000002937	Ren	renin [Source:RGD Symbol;Acc:3554]	0.210662	0.122506	0	0	0	0	1110.56	10.1171	up
GO:0008217	regulation of blood pressure	biological_process	5	6.0158e-07	ENSRNOG00000004404	Tac4	tachykinin 4 [Source:RGD Symbol;Acc:628842]	5.30119	5.34132	4.09235	0.769295	0.661404	0.350317	8.27329	3.04846	up
GO:0008217	regulation of blood pressure	biological_process	5	6.0158e-07	ENSRNOG00000004560	Cacna1b	calcium voltage-gated channel subunit alpha1 B [Source:RGD Symbol;Acc:628852]	0.178632	0.207804	0.083371	0.0219777	0.0460863	0.0587362	3.7051	1.88951	up
GO:0008217	regulation of blood pressure	biological_process	5	6.0158e-07	ENSRNOG00000005853	Tacr1	tachykinin receptor 1 [Source:RGD Symbol;Acc:3811]	0.962161	0.32157	1.14445	0	0.068343	0	35.5293	5.15094	up
GO:0008217	regulation of blood pressure	biological_process	5	6.0158e-07	ENSRNOG00000007290	Atp1a2	ATPase Na+/K+ transporting subunit alpha 2 [Source:RGD Symbol;Acc:2168]	1.11361	2.2107	0.439613	6.71531	7.20043	7.69308	0.174185	-2.52131	down
GO:0008217	regulation of blood pressure	biological_process	5	6.0158e-07	ENSRNOG00000007374	Tac1	tachykinin, precursor 1 [Source:RGD Symbol;Acc:3807]	0.715164	0.85091	1.28238	3.61698	2.4429	1.33902	0.384984	-1.37713	down
GO:0008217	regulation of blood pressure	biological_process	5	6.0158e-07	ENSRNOG00000011039	Gch1	GTP cyclohydrolase 1 [Source:RGD Symbol;Acc:61992]	24.2456	21.4661	37.719	12.8307	12.749	11.0912	2.27513	1.18595	up
GO:0008217	regulation of blood pressure	biological_process	5	6.0158e-07	ENSRNOG00000014117	Hmox1	heme oxygenase 1 [Source:RGD Symbol;Acc:2806]	551.077	151.281	396.168	28.4904	25.1169	27.1124	13.6091	3.7665	up
GO:0008217	regulation of blood pressure	biological_process	5	6.0158e-07	ENSRNOG00000014149	Npy1r	neuropeptide Y receptor Y1 [Source:RGD Symbol;Acc:3198]	0	0	0	0.222327	0.145005	0.166436	0.000562042	-10.797	down
GO:0008217	regulation of blood pressure	biological_process	5	6.0158e-07	ENSRNOG00000019048	Sod2	superoxide dismutase 2 [Source:RGD Symbol;Acc:3732]	144.337	78.5731	208.619	61.5879	59.3721	55.3391	2.44771	1.29143	up
GO:0008217	regulation of blood pressure	biological_process	5	6.0158e-07	ENSRNOG00000019342	Sult1a1	sulfotransferase family 1A member 1 [Source:RGD Symbol;Acc:3767]	63.889	69.0103	69.1546	233.259	234.085	245.237	0.283552	-1.81831	down
GO:0008217	regulation of blood pressure	biological_process	5	6.0158e-07	ENSRNOG00000025757	Myh6	myosin heavy chain 6 [Source:RGD Symbol;Acc:62029]	0	0.014741	0.007949	5.02898	0.023107	2.7062	0.00292461	-8.41754	down
GO:0008217	regulation of blood pressure	biological_process	5	6.0158e-07	ENSRNOG00000058039	Acta2	actin alpha 2, smooth muscle [Source:RGD Symbol;Acc:621676]	251.371	255.477	327.807	74.1844	84.8511	106.259	3.14615	1.65359	up
GO:0008217	regulation of blood pressure	biological_process	5	6.0158e-07	ENSRNOG00000062101	Ace	angiotensin I converting enzyme [Source:RGD Symbol;Acc:2493]	116.54	162.976	113.041	251.855	283.285	379.239	0.429316	-1.21989	down
GO:0008284	positive regulation of cell population proliferation	biological_process	7	8.89771e-07	ENSRNOG00000002105	Cdc7	cell division cycle 7 [Source:RGD Symbol;Acc:1308351]	1.47858	1.58445	2.42449	0.766311	0.809981	0.812626	2.29708	1.1998	up
GO:0008284	positive regulation of cell population proliferation	biological_process	7	8.89771e-07	ENSRNOG00000002244	Pdgfra	platelet derived growth factor receptor alpha [Source:RGD Symbol;Acc:3284]	10.7913	10.4928	10.1398	22.5292	21.8926	24.1598	0.458196	-1.12596	down
GO:0008284	positive regulation of cell population proliferation	biological_process	7	8.89771e-07	ENSRNOG00000002331	Aldh3a1	aldehyde dehydrogenase 3 family, member A1 [Source:RGD Symbol;Acc:2088]	0.906245	1.33741	0.734843	3.9607	3.15494	3.58458	0.278359	-1.84498	down
GO:0008284	positive regulation of cell population proliferation	biological_process	7	8.89771e-07	ENSRNOG00000002418	Tgfb2	transforming growth factor, beta 2 [Source:RGD Symbol;Acc:70491]	32.2616	34.4352	34.8496	12.3645	10.9716	12.4504	2.83756	1.50465	up
GO:0008284	positive regulation of cell population proliferation	biological_process	7	8.89771e-07	ENSRNOG00000002525	Ptgs2	prostaglandin-endoperoxide synthase 2 [Source:RGD Symbol;Acc:620349]	1.16561	3.47891	3.42764	1.65163	1.08205	1.05589	2.1301	1.09092	up
GO:0008284	positive regulation of cell population proliferation	biological_process	7	8.89771e-07	ENSRNOG00000002607	Sox9	SRY box 9 [Source:RGD Symbol;Acc:620474]	0.120299	0.141518	0.108652	0.275685	0.369276	0.760508	0.263591	-1.92363	down
GO:0008284	positive regulation of cell population proliferation	biological_process	7	8.89771e-07	ENSRNOG00000002754	Areg	amphiregulin [Source:RGD Symbol;Acc:2149]	15.0098	32.3225	41.5271	12.678	12.7718	5.23223	2.89613	1.53413	up
GO:0008284	positive regulation of cell population proliferation	biological_process	7	8.89771e-07	ENSRNOG00000002771	Ereg	epiregulin [Source:RGD Symbol;Acc:620299]	3.53527	6.81166	10.5663	3.01735	3.00566	2.96011	2.32806	1.21913	up
GO:0008284	positive regulation of cell population proliferation	biological_process	7	8.89771e-07	ENSRNOG00000002978	Faslg	Fas ligand [Source:RGD Symbol;Acc:3880]	0.816894	1.01133	0.807977	3.43662	5.79528	3.71874	0.203558	-2.29649	down
GO:0008284	positive regulation of cell population proliferation	biological_process	7	8.89771e-07	ENSRNOG00000003694	Prox1	prospero homeobox 1 [Source:RGD Symbol;Acc:1306890]	0.666118	0.574088	0.309192	0.152019	0.171976	0.313678	2.42977	1.28082	up
GO:0008284	positive regulation of cell population proliferation	biological_process	7	8.89771e-07	ENSRNOG00000004400	Avpr1a	arginine vasopressin receptor 1A [Source:RGD Symbol;Acc:2185]	0.884247	0.991065	0.583946	2.30329	2.28827	2.50882	0.346356	-1.52967	down
GO:0008284	positive regulation of cell population proliferation	biological_process	7	8.89771e-07	ENSRNOG00000004470	Il24	interleukin 24 [Source:RGD Symbol;Acc:621484]	4.71744	2.76935	8.35128	0.381472	0.213099	0.210391	19.6755	4.29833	up
GO:0008284	positive regulation of cell population proliferation	biological_process	7	8.89771e-07	ENSRNOG00000004854	Has2	hyaluronan synthase 2 [Source:RGD Symbol;Acc:2781]	0.632455	0.404069	0.485014	0.097024	0.031942	0.012871	10.7274	3.42322	up
GO:0008284	positive regulation of cell population proliferation	biological_process	7	8.89771e-07	ENSRNOG00000005639	Ar	androgen receptor [Source:RGD Symbol;Acc:2147]	0.44139	0.578004	0.220709	1.04348	0.79231	1.11291	0.420559	-1.24962	down
GO:0008284	positive regulation of cell population proliferation	biological_process	7	8.89771e-07	ENSRNOG00000005650	Pgf	placental growth factor [Source:RGD Symbol;Acc:619850]	4.74821	4.86013	6.89225	1.81335	1.74628	1.74662	3.10965	1.63675	up
GO:0008284	positive regulation of cell population proliferation	biological_process	7	8.89771e-07	ENSRNOG00000006579	Reg3g	regenerating family member 3 gamma [Source:RGD Symbol;Acc:3256]	3.69088	0.080361	3.74511	0	0	0	25054.5	14.6128	up
GO:0008284	positive regulation of cell population proliferation	biological_process	7	8.89771e-07	ENSRNOG00000007002	Lif	LIF, interleukin 6 family cytokine [Source:RGD Symbol;Acc:620865]	2.79472	2.7336	5.46239	0.419517	0.645634	0.611047	6.55692	2.71302	up
GO:0008284	positive regulation of cell population proliferation	biological_process	7	8.89771e-07	ENSRNOG00000007034	Hipk2	homeodomain interacting protein kinase 2 [Source:RGD Symbol;Acc:1309349]	6.53564	8.17686	4.82393	12.4347	18.4716	16.4967	0.412135	-1.27881	down
GO:0008284	positive regulation of cell population proliferation	biological_process	7	8.89771e-07	ENSRNOG00000007468	Ifng	interferon gamma [Source:RGD Symbol;Acc:2866]	0	0	0	0.111509	0.315579	0.259981	0.000436637	-11.1613	down
GO:0008284	positive regulation of cell population proliferation	biological_process	7	8.89771e-07	ENSRNOG00000007637	Acer2	alkaline ceramidase 2 [Source:RGD Symbol;Acc:1304629]	45.3088	74.0441	75.5933	129.285	143.009	166.017	0.444766	-1.16888	down
GO:0008284	positive regulation of cell population proliferation	biological_process	7	8.89771e-07	ENSRNOG00000009768	LOC100912228	pro-neuropeptide Y-like [Source:RGD Symbol;Acc:6487865]	5.52974	7.0638	11.5309	19.3687	12.1043	22.9197	0.443523	-1.17292	down
GO:0008284	positive regulation of cell population proliferation	biological_process	7	8.89771e-07	ENSRNOG00000009867	Tgfb3	transforming growth factor, beta 3 [Source:RGD Symbol;Acc:3851]	28.04	20.6768	22.6266	8.0599	7.08636	6.45932	3.30208	1.72338	up
GO:0008284	positive regulation of cell population proliferation	biological_process	7	8.89771e-07	ENSRNOG00000010208	Timp1	TIMP metallopeptidase inhibitor 1 [Source:RGD Symbol;Acc:621675]	191.725	124.836	377.443	39.0496	29.0957	32.338	6.90666	2.78799	up
GO:0008284	positive regulation of cell population proliferation	biological_process	7	8.89771e-07	ENSRNOG00000010797	Esm1	endothelial cell-specific molecule 1 [Source:RGD Symbol;Acc:71013]	0.637304	0.835068	0.784875	5.29472	4.49361	5.41798	0.148442	-2.75203	down
GO:0008284	positive regulation of cell population proliferation	biological_process	7	8.89771e-07	ENSRNOG00000010898	Prok2	prokineticin 2 [Source:RGD Symbol;Acc:620280]	0.091248	0	0	0.839639	0.365563	0.909689	0.0431455	-4.53465	down
GO:0008284	positive regulation of cell population proliferation	biological_process	7	8.89771e-07	ENSRNOG00000011696	Lifr	LIF receptor subunit alpha [Source:RGD Symbol;Acc:621431]	14.613	20.5057	9.77783	34.2651	45.0252	57.9032	0.32725	-1.61154	down
GO:0008284	positive regulation of cell population proliferation	biological_process	7	8.89771e-07	ENSRNOG00000011946	Ptn	pleiotrophin [Source:RGD Symbol;Acc:3444]	7.08411	4.9815	4.90333	1.78003	1.39043	2.30363	3.09986	1.63221	up
GO:0008284	positive regulation of cell population proliferation	biological_process	7	8.89771e-07	ENSRNOG00000013057	Prc1	protein regulator of cytokinesis 1 [Source:RGD Symbol;Acc:1311754]	14.4826	15.5047	16.8116	6.18895	7.00335	5.54185	2.49805	1.3208	up
GO:0008284	positive regulation of cell population proliferation	biological_process	7	8.89771e-07	ENSRNOG00000013069	Sapcd2	suppressor APC domain containing 2 [Source:RGD Symbol;Acc:1590629]	2.39258	2.32028	2.62595	0.532251	0.611989	0.874593	3.63518	1.86203	up
GO:0008284	positive regulation of cell population proliferation	biological_process	7	8.89771e-07	ENSRNOG00000013376	Mvd	mevalonate diphosphate decarboxylase [Source:RGD Symbol;Acc:621292]	9.65513	10.9672	12.0106	5.39337	6.07306	4.29109	2.07094	1.05029	up
GO:0008284	positive regulation of cell population proliferation	biological_process	7	8.89771e-07	ENSRNOG00000013850	Hes5	hes family bHLH transcription factor 5 [Source:RGD Symbol;Acc:621340]	0	0	0	0.366786	0.286635	0.493313	0.000261613	-11.9003	down
GO:0008284	positive regulation of cell population proliferation	biological_process	7	8.89771e-07	ENSRNOG00000014248	Erbb4	erb-b2 receptor tyrosine kinase 4 [Source:RGD Symbol;Acc:620486]	0.102964	0.118757	0.047957	0.602772	0.820792	0.860173	0.118086	-3.08209	down
GO:0008284	positive regulation of cell population proliferation	biological_process	7	8.89771e-07	ENSRNOG00000014269	Cxcr2	C-X-C motif chemokine receptor 2 [Source:RGD Symbol;Acc:2906]	2.28515	1.28783	1.53123	4.02702	2.16233	5.47115	0.437735	-1.19187	down
GO:0008284	positive regulation of cell population proliferation	biological_process	7	8.89771e-07	ENSRNOG00000014288	Fn1	fibronectin 1 [Source:RGD Symbol;Acc:2624]	280.945	248.379	229.735	57.4707	64.5711	77.3481	3.80691	1.92862	up
GO:0008284	positive regulation of cell population proliferation	biological_process	7	8.89771e-07	ENSRNOG00000015036	Ccn2	cellular communication network factor 2 [Source:RGD Symbol;Acc:621392]	218.744	343.767	345.238	124.994	151.721	144.012	2.15757	1.10941	up
GO:0008284	positive regulation of cell population proliferation	biological_process	7	8.89771e-07	ENSRNOG00000015618	Wnt5a	Wnt family member 5A [Source:RGD Symbol;Acc:69250]	7.40085	6.90616	6.99221	3.0348	2.5955	2.2052	2.7183	1.4427	up
GO:0008284	positive regulation of cell population proliferation	biological_process	7	8.89771e-07	ENSRNOG00000016571	Ngf	nerve growth factor [Source:RGD Symbol;Acc:1598328]	0.683532	0.348949	0.591755	0.156563	0.22621	0.0462036	3.78631	1.92079	up
GO:0008284	positive regulation of cell population proliferation	biological_process	7	8.89771e-07	ENSRNOG00000018059	Ihh	Indian hedgehog signaling molecule [Source:RGD Symbol;Acc:620021]	0.149505	0.246864	0.042178	0.508533	0.832047	0.848627	0.200322	-2.31961	down
GO:0008284	positive regulation of cell population proliferation	biological_process	7	8.89771e-07	ENSRNOG00000018461	Pdgfrb	platelet derived growth factor receptor beta [Source:RGD Symbol;Acc:3285]	29.9477	33.1625	27.8463	12.2108	11.6934	13.6546	2.42171	1.27603	up
GO:0008284	positive regulation of cell population proliferation	biological_process	7	8.89771e-07	ENSRNOG00000018839	Ntrk2	neurotrophic receptor tyrosine kinase 2 [Source:RGD Symbol;Acc:3213]	2.74908	5.01041	5.1754	0.644865	1.09069	0.941283	4.83215	2.27267	up
GO:0008284	positive regulation of cell population proliferation	biological_process	7	8.89771e-07	ENSRNOG00000018929	Kif20b	kinesin family member 20B [Source:RGD Symbol;Acc:1308497]	1.60221	1.05045	1.19058	0.229964	0.322757	0.570115	3.4228	1.77518	up
GO:0008284	positive regulation of cell population proliferation	biological_process	7	8.89771e-07	ENSRNOG00000019138	Clec11a	C-type lectin domain containing 11A [Source:RGD Symbol;Acc:3627]	2.21488	1.61767	1.58088	0.299434	0.084132	0.026429	13.2036	3.72286	up
GO:0008284	positive regulation of cell population proliferation	biological_process	7	8.89771e-07	ENSRNOG00000020030	Crlf1	cytokine receptor-like factor 1 [Source:RGD Symbol;Acc:1311371]	61.323	55.0079	52.8657	24.5653	29.9984	21.4165	2.22685	1.15501	up
GO:0008284	positive regulation of cell population proliferation	biological_process	7	8.89771e-07	ENSRNOG00000020733	Camp	cathelicidin antimicrobial peptide [Source:RGD Symbol;Acc:1559878]	1.35987	0.998778	1.40631	2.74325	2.92398	3.19669	0.42475	-1.23531	down
GO:0008284	positive regulation of cell population proliferation	biological_process	7	8.89771e-07	ENSRNOG00000020948	Pth1r	parathyroid hormone 1 receptor [Source:RGD Symbol;Acc:3442]	8.63491	9.04509	5.00246	3.75007	3.62401	3.48961	2.08792	1.06206	up
GO:0008284	positive regulation of cell population proliferation	biological_process	7	8.89771e-07	ENSRNOG00000021569	Tiam1	T-cell lymphoma invasion and metastasis 1 [Source:RGD Symbol;Acc:1307455]	2.12158	2.24547	1.49218	0.584266	1.21954	1.06253	2.04415	1.0315	up
GO:0008284	positive regulation of cell population proliferation	biological_process	7	8.89771e-07	ENSRNOG00000023712	Stox1	storkhead box 1 [Source:RGD Symbol;Acc:1310622]	0.342974	0.594783	0.274881	1.40648	2.03224	1.77634	0.232526	-2.10453	down
GO:0008284	positive regulation of cell population proliferation	biological_process	7	8.89771e-07	ENSRNOG00000025120	Gli1	GLI family zinc finger 1 [Source:RGD Symbol;Acc:621673]	3.22817	2.74387	2.02003	0.698325	0.477126	0.544131	4.64769	2.21651	up
GO:0008284	positive regulation of cell population proliferation	biological_process	7	8.89771e-07	ENSRNOG00000028415	Cdc20	cell division cycle 20 [Source:RGD Symbol;Acc:620477]	8.20218	8.18058	9.39277	1.63592	3.33288	2.76729	3.33185	1.73632	up
GO:0008284	positive regulation of cell population proliferation	biological_process	7	8.89771e-07	ENSRNOG00000033192	Osmr	oncostatin M receptor [Source:RGD Symbol;Acc:1302983]	11.718	9.37308	19.7537	4.0249	3.86177	3.74351	3.51197	1.81228	up
GO:0008284	positive regulation of cell population proliferation	biological_process	7	8.89771e-07	ENSRNOG00000037211	Kif14	kinesin family member 14 [Source:RGD Symbol;Acc:1310650]	0.408599	0.514553	0.502817	0.144096	0.129417	0.139755	3.45047	1.78679	up
GO:0008284	positive regulation of cell population proliferation	biological_process	7	8.89771e-07	ENSRNOG00000038909	Pou3f3	POU class 3 homeobox 3 [Source:RGD Symbol;Acc:619768]	0	1.4154	0	0	0	0	4718.01	12.204	up
GO:0008284	positive regulation of cell population proliferation	biological_process	7	8.89771e-07	ENSRNOG00000045829	Thbs1	thrombospondin 1 [Source:RGD Symbol;Acc:1588455]	69.4641	106.372	164.303	19.9347	19.858	26.7682	5.11019	2.35338	up
GO:0008284	positive regulation of cell population proliferation	biological_process	7	8.89771e-07	ENSRNOG00000046449	Npy	neuropeptide Y [Source:RGD Symbol;Acc:3197]	5.83501	7.53937	12.3021	20.7918	13.0994	24.5613	0.43927	-1.18682	down
GO:0008284	positive regulation of cell population proliferation	biological_process	7	8.89771e-07	ENSRNOG00000046958	Abo	ABO, alpha 1-3-N-acetylgalactosaminyltransferase and alpha 1-3-galactosyltransferase [Source:RGD Symbol;Acc:2307241]	4.12501	2.95025	2.83983	1.35281	1.56672	1.35476	2.31971	1.21394	up
GO:0008284	positive regulation of cell population proliferation	biological_process	7	8.89771e-07	ENSRNOG00000047307	Cntfr	ciliary neurotrophic factor receptor [Source:RGD Symbol;Acc:1303100]	0.496101	0.273565	0.223928	1.66573	2.19656	2.404	0.158562	-2.65688	down
GO:0008284	positive regulation of cell population proliferation	biological_process	7	8.89771e-07	ENSRNOG00000054286	Rrm2	ribonucleotide reductase regulatory subunit M2 [Source:RGD Symbol;Acc:1598310]	8.16388	9.93891	11.9198	2.25539	2.08556	3.09141	4.03944	2.01416	up
GO:0008284	positive regulation of cell population proliferation	biological_process	7	8.89771e-07	ENSRNOG00000058645	Tnc	tenascin C [Source:RGD Symbol;Acc:621057]	32.8819	24.6221	38.6851	6.23045	5.06284	5.64608	5.67843	2.50549	up
GO:0019233	sensory perception of pain	biological_process	7	9.40867e-07	ENSRNOG00000002343	Uchl1	ubiquitin C-terminal hydrolase L1 [Source:RGD Symbol;Acc:3928]	5.50301	2.43439	3.73477	0.480678	0.909827	0.924316	5.04237	2.3341	up
GO:0019233	sensory perception of pain	biological_process	7	9.40867e-07	ENSRNOG00000002525	Ptgs2	prostaglandin-endoperoxide synthase 2 [Source:RGD Symbol;Acc:620349]	1.16561	3.47891	3.42764	1.65163	1.08205	1.05589	2.1301	1.09092	up
GO:0019233	sensory perception of pain	biological_process	7	9.40867e-07	ENSRNOG00000004488	Bdkrb1	bradykinin receptor B1 [Source:RGD Symbol;Acc:620401]	0.213898	0.179507	1.7444	0	0.153112	0.038042	11.1837	3.48332	up
GO:0019233	sensory perception of pain	biological_process	7	9.40867e-07	ENSRNOG00000005519	Grm3	glutamate metabotropic receptor 3 [Source:RGD Symbol;Acc:2744]	1.19676	1.61378	0.921182	0.377273	0.291303	0.740839	2.64771	1.40475	up
GO:0019233	sensory perception of pain	biological_process	7	9.40867e-07	ENSRNOG00000005853	Tacr1	tachykinin receptor 1 [Source:RGD Symbol;Acc:3811]	0.962161	0.32157	1.14445	0	0.068343	0	35.5293	5.15094	up
GO:0019233	sensory perception of pain	biological_process	7	9.40867e-07	ENSRNOG00000007159	Ccl2	C-C motif chemokine ligand 2 [Source:RGD Symbol;Acc:3645]	37.7066	18.9936	41.8423	1.20024	1.4775	2.90705	17.6448	4.14117	up
GO:0019233	sensory perception of pain	biological_process	7	9.40867e-07	ENSRNOG00000007374	Tac1	tachykinin, precursor 1 [Source:RGD Symbol;Acc:3807]	0.715164	0.85091	1.28238	3.61698	2.4429	1.33902	0.384984	-1.37713	down
GO:0019233	sensory perception of pain	biological_process	7	9.40867e-07	ENSRNOG00000007454	Aloxe3	arachidonate lipoxygenase 3 [Source:RGD Symbol;Acc:1306252]	0.57237	0.586702	0.548545	1.33517	1.50765	0.994009	0.44506	-1.16793	down
GO:0019233	sensory perception of pain	biological_process	7	9.40867e-07	ENSRNOG00000008223	Cnr1	cannabinoid receptor 1 [Source:RGD Symbol;Acc:2369]	1.5166	1.73802	1.62987	3.34558	5.79038	5.24774	0.339586	-1.55815	down
GO:0019233	sensory perception of pain	biological_process	7	9.40867e-07	ENSRNOG00000011202	Chrna4	cholinergic receptor nicotinic alpha 4 subunit [Source:RGD Symbol;Acc:2346]	0.0771047	0.0859449	0.0798405	0.579064	0.546145	0.315917	0.168542	-2.56882	down
GO:0019233	sensory perception of pain	biological_process	7	9.40867e-07	ENSRNOG00000013953	Ntrk1	neurotrophic receptor tyrosine kinase 1 [Source:RGD Symbol;Acc:620144]	0.089799	0.0959429	0.0319835	0.269543	0.411822	0.210092	0.244236	-2.03366	down
GO:0019233	sensory perception of pain	biological_process	7	9.40867e-07	ENSRNOG00000014149	Npy1r	neuropeptide Y receptor Y1 [Source:RGD Symbol;Acc:3198]	0	0	0	0.222327	0.145005	0.166436	0.000562042	-10.797	down
GO:0019233	sensory perception of pain	biological_process	7	9.40867e-07	ENSRNOG00000014290	Grm1	glutamate metabotropic receptor 1 [Source:RGD Symbol;Acc:2742]	0.009912	0	0.015688	0.069331	0.104979	0.0226431	0.12998	-2.94364	down
GO:0019233	sensory perception of pain	biological_process	7	9.40867e-07	ENSRNOG00000016571	Ngf	nerve growth factor [Source:RGD Symbol;Acc:1598328]	0.683532	0.348949	0.591755	0.156563	0.22621	0.0462036	3.78631	1.92079	up
GO:0019233	sensory perception of pain	biological_process	7	9.40867e-07	ENSRNOG00000022635	Dlg2	discs large MAGUK scaffold protein 2 [Source:RGD Symbol;Acc:619895]	2.22808	1.43888	1.17353	0.488068	0.348309	0.892297	2.80012	1.48549	up
GO:0019233	sensory perception of pain	biological_process	7	9.40867e-07	ENSRNOG00000032473	Scn10a	sodium voltage-gated channel alpha subunit 10 [Source:RGD Symbol;Acc:3629]	0.321816	0.410481	1.18959	0.079553	0.175059	0.119174	5.14167	2.36224	up
GO:0019233	sensory perception of pain	biological_process	7	9.40867e-07	ENSRNOG00000057221	Scn3b	sodium voltage-gated channel beta subunit 3 [Source:RGD Symbol;Acc:621657]	73.4352	92.293	99.9023	21.0976	17.1091	25.2416	4.18657	2.06577	up
GO:0070374	positive regulation of ERK1 and ERK2 cascade	biological_process	12	1.19361e-06	ENSRNOG00000000239	Ccl7	C-C motif chemokine ligand 7 [Source:RGD Symbol;Acc:1359152]	14.4232	11.1589	18.1968	0.946133	0.831492	2.17106	11.087	3.47079	up
GO:0070374	positive regulation of ERK1 and ERK2 cascade	biological_process	12	1.19361e-06	ENSRNOG00000002244	Pdgfra	platelet derived growth factor receptor alpha [Source:RGD Symbol;Acc:3284]	10.7913	10.4928	10.1398	22.5292	21.8926	24.1598	0.458196	-1.12596	down
GO:0070374	positive regulation of ERK1 and ERK2 cascade	biological_process	12	1.19361e-06	ENSRNOG00000004641	Sstr4	somatostatin receptor 4 [Source:RGD Symbol;Acc:3764]	4.35857	4.697	2.99517	7.81727	5.98183	11.5699	0.475019	-1.07394	down
GO:0070374	positive regulation of ERK1 and ERK2 cascade	biological_process	12	1.19361e-06	ENSRNOG00000007159	Ccl2	C-C motif chemokine ligand 2 [Source:RGD Symbol;Acc:3645]	37.7066	18.9936	41.8423	1.20024	1.4775	2.90705	17.6448	4.14117	up
GO:0070374	positive regulation of ERK1 and ERK2 cascade	biological_process	12	1.19361e-06	ENSRNOG00000007335	Ccl11	C-C motif chemokine ligand 11 [Source:RGD Symbol;Acc:3644]	3.34409	1.3286	2.39904	6.15745	3.9376	18.2383	0.249591	-2.00236	down
GO:0070374	positive regulation of ERK1 and ERK2 cascade	biological_process	12	1.19361e-06	ENSRNOG00000008587	Tek	TEK receptor tyrosine kinase [Source:RGD Symbol;Acc:620980]	65.5676	80.6655	55.963	143.626	152.459	196.801	0.410229	-1.2855	down
GO:0070374	positive regulation of ERK1 and ERK2 cascade	biological_process	12	1.19361e-06	ENSRNOG00000008816	Gpnmb	glycoprotein nmb [Source:RGD Symbol;Acc:71008]	364.08	375.726	301.379	194.008	146.217	143.748	2.15133	1.10523	up
GO:0070374	positive regulation of ERK1 and ERK2 cascade	biological_process	12	1.19361e-06	ENSRNOG00000009522	Adra1a	adrenoceptor alpha 1A [Source:RGD Symbol;Acc:2055]	0.443506	0.522418	0.301567	0.884054	1.07486	0.934857	0.438007	-1.19097	down
GO:0070374	positive regulation of ERK1 and ERK2 cascade	biological_process	12	1.19361e-06	ENSRNOG00000009768	LOC100912228	pro-neuropeptide Y-like [Source:RGD Symbol;Acc:6487865]	5.52974	7.0638	11.5309	19.3687	12.1043	22.9197	0.443523	-1.17292	down
GO:0070374	positive regulation of ERK1 and ERK2 cascade	biological_process	12	1.19361e-06	ENSRNOG00000010278	Il6	interleukin 6 [Source:RGD Symbol;Acc:2901]	3.16485	2.11915	11.0231	0.116354	0.115796	0.224046	35.7458	5.1597	up
GO:0070374	positive regulation of ERK1 and ERK2 cascade	biological_process	12	1.19361e-06	ENSRNOG00000012482	Ndrg4	NDRG family member 4 [Source:RGD Symbol;Acc:621593]	6.25223	5.10371	3.91888	2.17046	1.71634	2.79309	2.28669	1.19326	up
GO:0070374	positive regulation of ERK1 and ERK2 cascade	biological_process	12	1.19361e-06	ENSRNOG00000013578	Trem2	triggering receptor expressed on myeloid cells 2 [Source:RGD Symbol;Acc:1309841]	38.0505	26.603	29.0729	10.8948	5.01708	5.6079	4.35536	2.12279	up
GO:0070374	positive regulation of ERK1 and ERK2 cascade	biological_process	12	1.19361e-06	ENSRNOG00000013953	Ntrk1	neurotrophic receptor tyrosine kinase 1 [Source:RGD Symbol;Acc:620144]	0.089799	0.0959429	0.0319835	0.269543	0.411822	0.210092	0.244236	-2.03366	down
GO:0070374	positive regulation of ERK1 and ERK2 cascade	biological_process	12	1.19361e-06	ENSRNOG00000014248	Erbb4	erb-b2 receptor tyrosine kinase 4 [Source:RGD Symbol;Acc:620486]	0.102964	0.118757	0.047957	0.602772	0.820792	0.860173	0.118086	-3.08209	down
GO:0070374	positive regulation of ERK1 and ERK2 cascade	biological_process	12	1.19361e-06	ENSRNOG00000015036	Ccn2	cellular communication network factor 2 [Source:RGD Symbol;Acc:621392]	218.744	343.767	345.238	124.994	151.721	144.012	2.15757	1.10941	up
GO:0070374	positive regulation of ERK1 and ERK2 cascade	biological_process	12	1.19361e-06	ENSRNOG00000015992	Ccl20	C-C motif chemokine ligand 20 [Source:RGD Symbol;Acc:3646]	3.55187	1.52624	2.52854	0.934769	1.07933	0.51172	3.01156	1.59051	up
GO:0070374	positive regulation of ERK1 and ERK2 cascade	biological_process	12	1.19361e-06	ENSRNOG00000016278	Ccl17	C-C motif chemokine ligand 17 [Source:RGD Symbol;Acc:619924]	3.89019	6.53501	5.24364	1.31455	3.29401	1.16464	2.71406	1.44045	up
GO:0070374	positive regulation of ERK1 and ERK2 cascade	biological_process	12	1.19361e-06	ENSRNOG00000016535	Ccl22	C-C motif chemokine ligand 22 [Source:RGD Symbol;Acc:619933]	0.579045	2.03706	1.27757	0.082517	0.590059	0.297163	4.01517	2.00546	up
GO:0070374	positive regulation of ERK1 and ERK2 cascade	biological_process	12	1.19361e-06	ENSRNOG00000016571	Ngf	nerve growth factor [Source:RGD Symbol;Acc:1598328]	0.683532	0.348949	0.591755	0.156563	0.22621	0.0462036	3.78631	1.92079	up
GO:0070374	positive regulation of ERK1 and ERK2 cascade	biological_process	12	1.19361e-06	ENSRNOG00000016945	Pla2g2a	phospholipase A2 group IIA [Source:RGD Symbol;Acc:620857]	430.776	142.041	305.208	62.6552	8.5295	13.1795	10.4076	3.37956	up
GO:0070374	positive regulation of ERK1 and ERK2 cascade	biological_process	12	1.19361e-06	ENSRNOG00000018461	Pdgfrb	platelet derived growth factor receptor beta [Source:RGD Symbol;Acc:3285]	29.9477	33.1625	27.8463	12.2108	11.6934	13.6546	2.42171	1.27603	up
GO:0070374	positive regulation of ERK1 and ERK2 cascade	biological_process	12	1.19361e-06	ENSRNOG00000019270	P2ry6	pyrimidinergic receptor P2Y6 [Source:RGD Symbol;Acc:620269]	4.58353	4.02383	4.23688	1.28928	1.36146	1.89351	2.82648	1.49901	up
GO:0070374	positive regulation of ERK1 and ERK2 cascade	biological_process	12	1.19361e-06	ENSRNOG00000021276	Bmp2	bone morphogenetic protein 2 [Source:RGD Symbol;Acc:2211]	3.40519	7.43167	5.53057	2.54594	1.70193	2.53326	2.41367	1.27123	up
GO:0070374	positive regulation of ERK1 and ERK2 cascade	biological_process	12	1.19361e-06	ENSRNOG00000021851	Ccl1	C-C motif chemokine ligand 1 [Source:RGD Symbol;Acc:1586495]	1.29096	0.891293	0.828182	0.159979	0	0	18.8177	4.23402	up
GO:0070374	positive regulation of ERK1 and ERK2 cascade	biological_process	12	1.19361e-06	ENSRNOG00000029768	Ccl12	chemokine (C-C motif) ligand 12 [Source:RGD Symbol;Acc:1309255]	6.0007	2.47451	2.57848	0	0.075135	0.603588	16.286	4.02556	up
GO:0070374	positive regulation of ERK1 and ERK2 cascade	biological_process	12	1.19361e-06	ENSRNOG00000031162	Ccl24	C-C motif chemokine ligand 24 [Source:RGD Symbol;Acc:1310245]	5.13001	4.48235	6.31795	1.67853	1.29167	1.65069	3.44746	1.78553	up
GO:0070374	positive regulation of ERK1 and ERK2 cascade	biological_process	12	1.19361e-06	ENSRNOG00000031443	Havcr2	hepatitis A virus cellular receptor 2 [Source:RGD Symbol;Acc:1305233]	1.59267	1.74202	1.71679	0.758987	0.444499	0.545722	2.88787	1.53	up
GO:0070374	positive regulation of ERK1 and ERK2 cascade	biological_process	12	1.19361e-06	ENSRNOG00000034290	Ccl21	C-C motif chemokine ligand 21 [Source:RGD Symbol;Acc:1311996]	171.913	158.057	123.877	70.7503	53.7025	41.4424	2.73575	1.45194	up
GO:0070374	positive regulation of ERK1 and ERK2 cascade	biological_process	12	1.19361e-06	ENSRNOG00000046449	Npy	neuropeptide Y [Source:RGD Symbol;Acc:3197]	5.83501	7.53937	12.3021	20.7918	13.0994	24.5613	0.43927	-1.18682	down
GO:0070374	positive regulation of ERK1 and ERK2 cascade	biological_process	12	1.19361e-06	ENSRNOG00000048703	Alkal1	ALK and LTK ligand 1 [Source:RGD Symbol;Acc:1583530]	0.668538	2.13957	0.459282	0	0	0	10891.3	13.4109	up
GO:0070374	positive regulation of ERK1 and ERK2 cascade	biological_process	12	1.19361e-06	ENSRNOG00000049303	Marco	macrophage receptor with collagenous structure [Source:RGD Symbol;Acc:1589662]	0.632275	0.603204	0.631253	0	0	0	6222.44	12.6033	up
GO:0070374	positive regulation of ERK1 and ERK2 cascade	biological_process	12	1.19361e-06	ENSRNOG00000052205	Fgf23	fibroblast growth factor 23 [Source:RGD Symbol;Acc:620178]	0.318321	0.976255	0.694014	0	0	0	6628.63	12.6945	up
GO:0070374	positive regulation of ERK1 and ERK2 cascade	biological_process	12	1.19361e-06	ENSRNOG00000053272	Chi3l1	chitinase 3 like 1 [Source:RGD Symbol;Acc:620874]	187.923	110.593	195.544	69.2241	52.2938	54.6498	2.80449	1.48774	up
GO:0048245	eosinophil chemotaxis	biological_process	7	1.22706e-06	ENSRNOG00000000239	Ccl7	C-C motif chemokine ligand 7 [Source:RGD Symbol;Acc:1359152]	14.4232	11.1589	18.1968	0.946133	0.831492	2.17106	11.087	3.47079	up
GO:0048245	eosinophil chemotaxis	biological_process	7	1.22706e-06	ENSRNOG00000007159	Ccl2	C-C motif chemokine ligand 2 [Source:RGD Symbol;Acc:3645]	37.7066	18.9936	41.8423	1.20024	1.4775	2.90705	17.6448	4.14117	up
GO:0048245	eosinophil chemotaxis	biological_process	7	1.22706e-06	ENSRNOG00000007335	Ccl11	C-C motif chemokine ligand 11 [Source:RGD Symbol;Acc:3644]	3.34409	1.3286	2.39904	6.15745	3.9376	18.2383	0.249591	-2.00236	down
GO:0048245	eosinophil chemotaxis	biological_process	7	1.22706e-06	ENSRNOG00000010906	Ccl5	C-C motif chemokine ligand 5 [Source:RGD Symbol;Acc:69069]	33.6073	45.533	17.0812	161.621	269.977	147.801	0.166071	-2.59013	down
GO:0048245	eosinophil chemotaxis	biological_process	7	1.22706e-06	ENSRNOG00000015055	Scg2	secretogranin II [Source:RGD Symbol;Acc:3626]	0.035057	0.056805	0.033008	0.176457	0.151106	0.287455	0.203035	-2.3002	down
GO:0048245	eosinophil chemotaxis	biological_process	7	1.22706e-06	ENSRNOG00000021851	Ccl1	C-C motif chemokine ligand 1 [Source:RGD Symbol;Acc:1586495]	1.29096	0.891293	0.828182	0.159979	0	0	18.8177	4.23402	up
GO:0048245	eosinophil chemotaxis	biological_process	7	1.22706e-06	ENSRNOG00000029768	Ccl12	chemokine (C-C motif) ligand 12 [Source:RGD Symbol;Acc:1309255]	6.0007	2.47451	2.57848	0	0.075135	0.603588	16.286	4.02556	up
GO:0048245	eosinophil chemotaxis	biological_process	7	1.22706e-06	ENSRNOG00000031162	Ccl24	C-C motif chemokine ligand 24 [Source:RGD Symbol;Acc:1310245]	5.13001	4.48235	6.31795	1.67853	1.29167	1.65069	3.44746	1.78553	up
GO:0002548	monocyte chemotaxis	biological_process	6	1.30066e-06	ENSRNOG00000000239	Ccl7	C-C motif chemokine ligand 7 [Source:RGD Symbol;Acc:1359152]	14.4232	11.1589	18.1968	0.946133	0.831492	2.17106	11.087	3.47079	up
GO:0002548	monocyte chemotaxis	biological_process	6	1.30066e-06	ENSRNOG00000007159	Ccl2	C-C motif chemokine ligand 2 [Source:RGD Symbol;Acc:3645]	37.7066	18.9936	41.8423	1.20024	1.4775	2.90705	17.6448	4.14117	up
GO:0002548	monocyte chemotaxis	biological_process	6	1.30066e-06	ENSRNOG00000007335	Ccl11	C-C motif chemokine ligand 11 [Source:RGD Symbol;Acc:3644]	3.34409	1.3286	2.39904	6.15745	3.9376	18.2383	0.249591	-2.00236	down
GO:0002548	monocyte chemotaxis	biological_process	6	1.30066e-06	ENSRNOG00000015992	Ccl20	C-C motif chemokine ligand 20 [Source:RGD Symbol;Acc:3646]	3.55187	1.52624	2.52854	0.934769	1.07933	0.51172	3.01156	1.59051	up
GO:0002548	monocyte chemotaxis	biological_process	6	1.30066e-06	ENSRNOG00000016278	Ccl17	C-C motif chemokine ligand 17 [Source:RGD Symbol;Acc:619924]	3.89019	6.53501	5.24364	1.31455	3.29401	1.16464	2.71406	1.44045	up
GO:0002548	monocyte chemotaxis	biological_process	6	1.30066e-06	ENSRNOG00000016535	Ccl22	C-C motif chemokine ligand 22 [Source:RGD Symbol;Acc:619933]	0.579045	2.03706	1.27757	0.082517	0.590059	0.297163	4.01517	2.00546	up
GO:0002548	monocyte chemotaxis	biological_process	6	1.30066e-06	ENSRNOG00000021851	Ccl1	C-C motif chemokine ligand 1 [Source:RGD Symbol;Acc:1586495]	1.29096	0.891293	0.828182	0.159979	0	0	18.8177	4.23402	up
GO:0002548	monocyte chemotaxis	biological_process	6	1.30066e-06	ENSRNOG00000029768	Ccl12	chemokine (C-C motif) ligand 12 [Source:RGD Symbol;Acc:1309255]	6.0007	2.47451	2.57848	0	0.075135	0.603588	16.286	4.02556	up
GO:0002548	monocyte chemotaxis	biological_process	6	1.30066e-06	ENSRNOG00000031162	Ccl24	C-C motif chemokine ligand 24 [Source:RGD Symbol;Acc:1310245]	5.13001	4.48235	6.31795	1.67853	1.29167	1.65069	3.44746	1.78553	up
GO:0002548	monocyte chemotaxis	biological_process	6	1.30066e-06	ENSRNOG00000034290	Ccl21	C-C motif chemokine ligand 21 [Source:RGD Symbol;Acc:1311996]	171.913	158.057	123.877	70.7503	53.7025	41.4424	2.73575	1.45194	up
GO:0030199	collagen fibril organization	biological_process	7	1.60514e-06	ENSRNOG00000000463	Col11a2	collagen type XI alpha 2 chain [Source:RGD Symbol;Acc:2373]	0.500326	1.10928	0.443421	1.4898	1.50536	1.91439	0.41817	-1.25784	down
GO:0030199	collagen fibril organization	biological_process	7	1.60514e-06	ENSRNOG00000002418	Tgfb2	transforming growth factor, beta 2 [Source:RGD Symbol;Acc:70491]	32.2616	34.4352	34.8496	12.3645	10.9716	12.4504	2.83756	1.50465	up
GO:0030199	collagen fibril organization	biological_process	7	1.60514e-06	ENSRNOG00000003357	Col3a1	collagen type III alpha 1 chain [Source:RGD Symbol;Acc:71029]	773.166	628.281	469.974	156.474	148.568	159.465	4.02884	2.01036	up
GO:0030199	collagen fibril organization	biological_process	7	1.60514e-06	ENSRNOG00000003736	Col5a2	collagen type V alpha 2 chain [Source:RGD Symbol;Acc:70921]	97.1307	91.8408	82.7718	37.0816	38.9407	47.369	2.20229	1.139	up
GO:0030199	collagen fibril organization	biological_process	7	1.60514e-06	ENSRNOG00000003897	Col1a1	collagen type I alpha 1 chain [Source:RGD Symbol;Acc:61817]	330.164	210.993	127.588	21.9343	20.0594	21.0288	10.6112	3.40752	up
GO:0030199	collagen fibril organization	biological_process	7	1.60514e-06	ENSRNOG00000004610	Lum	lumican [Source:RGD Symbol;Acc:620984]	35.0811	13.503	14.0309	4.19002	2.93747	2.81793	6.29586	2.6544	up
GO:0030199	collagen fibril organization	biological_process	7	1.60514e-06	ENSRNOG00000008749	Col5a1	collagen type V alpha 1 chain [Source:RGD Symbol;Acc:70920]	26.8905	21.3001	17.3892	7.63965	8.60063	7.95309	2.71065	1.43864	up
GO:0030199	collagen fibril organization	biological_process	7	1.60514e-06	ENSRNOG00000014426	Lox	lysyl oxidase [Source:RGD Symbol;Acc:3015]	56.109	59.4426	61.512	17.4454	17.4535	21.6606	3.13057	1.64643	up
GO:0030199	collagen fibril organization	biological_process	7	1.60514e-06	ENSRNOG00000015787	P3h4	prolyl 3-hydroxylase family member 4 (non-enzymatic) [Source:RGD Symbol;Acc:620767]	10.1181	9.56442	9.01143	4.55713	3.9283	3.9535	2.30679	1.20588	up
GO:0030199	collagen fibril organization	biological_process	7	1.60514e-06	ENSRNOG00000016758	Loxl2	lysyl oxidase-like 2 [Source:RGD Symbol;Acc:1308435]	19.6039	17.8362	15.6078	4.77017	4.27398	5.86148	3.55891	1.83144	up
GO:0030199	collagen fibril organization	biological_process	7	1.60514e-06	ENSRNOG00000023148	Col11a1	collagen type XI alpha 1 chain [Source:RGD Symbol;Acc:2372]	2.43824	0.601978	0.83106	0.137976	0.134476	0.179405	8.56748	3.09887	up
GO:0030199	collagen fibril organization	biological_process	7	1.60514e-06	ENSRNOG00000061373	Loxl3	lysyl oxidase-like 3 [Source:RGD Symbol;Acc:1311011]	3.27172	3.4309	2.96157	1.31599	1.16898	1.3919	2.49279	1.31776	up
GO:0030199	collagen fibril organization	biological_process	7	1.60514e-06	ENSRNOG00000061484	Adamts2	ADAM metallopeptidase with thrombospondin type 1 motif, 2 [Source:RGD Symbol;Acc:1565950]	29.7744	26.0212	21.5239	7.85753	7.14294	6.23486	3.64108	1.86437	up
GO:0051301	cell division	biological_process	4	1.69589e-06	ENSRNOG00000000479	Kifc1	kinesin family member C1 [Source:RGD Symbol;Acc:1359118]	4.75423	4.77579	5.46839	1.19344	2.08646	1.96827	2.85784	1.51492	up
GO:0051301	cell division	biological_process	4	1.69589e-06	ENSRNOG00000000632	Cdk1	cyclin-dependent kinase 1 [Source:RGD Symbol;Acc:2319]	13.2074	15.3817	18.7413	2.64068	4.12548	3.85137	4.45776	2.15632	up
GO:0051301	cell division	biological_process	4	1.69589e-06	ENSRNOG00000002105	Cdc7	cell division cycle 7 [Source:RGD Symbol;Acc:1308351]	1.47858	1.58445	2.42449	0.766311	0.809981	0.812626	2.29708	1.1998	up
GO:0051301	cell division	biological_process	4	1.69589e-06	ENSRNOG00000002711	Nuf2	NUF2 component of NDC80 kinetochore complex [Source:RGD Symbol;Acc:1307952]	3.67843	3.50871	4.29129	1.01818	0.890671	1.13455	3.77158	1.91517	up
GO:0051301	cell division	biological_process	4	1.69589e-06	ENSRNOG00000003802	Pttg1	PTTG1 regulator of sister chromatid separation, securin [Source:RGD Symbol;Acc:68359]	4.7681	5.24809	6.20749	0.786092	2.20623	1.23079	3.84164	1.94172	up
GO:0051301	cell division	biological_process	4	1.69589e-06	ENSRNOG00000006731	Spc25	SPC25 component of NDC80 kinetochore complex [Source:RGD Symbol;Acc:1307811]	5.48846	4.99486	4.62358	2.3222	2.3257	2.49192	2.11587	1.08125	up
GO:0051301	cell division	biological_process	4	1.69589e-06	ENSRNOG00000007483	Ccnf	cyclin F [Source:RGD Symbol;Acc:67401]	5.27575	4.6911	4.77693	2.05871	2.65918	2.06166	2.17474	1.12084	up
GO:0051301	cell division	biological_process	4	1.69589e-06	ENSRNOG00000009334	Knstrn	kinetochore-localized astrin/SPAG5 binding protein [Source:RGD Symbol;Acc:1303240]	4.35631	3.76269	4.622	0.968522	1.7877	1.13465	3.27458	1.71131	up
GO:0051301	cell division	biological_process	4	1.69589e-06	ENSRNOG00000010897	Nek6	NIMA-related kinase 6 [Source:RGD Symbol;Acc:727779]	24.6017	20.4795	24.2431	12.3838	8.64512	8.77541	2.32598	1.21784	up
GO:0051301	cell division	biological_process	4	1.69589e-06	ENSRNOG00000011777	Spag5	sperm associated antigen 5 [Source:RGD Symbol;Acc:620152]	2.44501	2.6931	2.96398	0.502205	0.971205	1.0237	3.24459	1.69803	up
GO:0051301	cell division	biological_process	4	1.69589e-06	ENSRNOG00000012051	Ncaph	non-SMC condensin I complex, subunit H [Source:RGD Symbol;Acc:1596799]	3.46488	2.81969	4.46199	0.600087	1.17351	1.34667	3.44412	1.78413	up
GO:0051301	cell division	biological_process	4	1.69589e-06	ENSRNOG00000014130	Cks2	CDC28 protein kinase regulatory subunit 2 [Source:RGD Symbol;Acc:1562047]	10.9467	10.8736	11.7058	5.25151	5.01849	3.99499	2.35024	1.23281	up
GO:0051301	cell division	biological_process	4	1.69589e-06	ENSRNOG00000014336	Mcm5	minichromosome maintenance complex component 5 [Source:RGD Symbol;Acc:1306616]	6.53995	6.75158	9.54692	2.16203	2.89314	3.66249	2.61979	1.38945	up
GO:0051301	cell division	biological_process	4	1.69589e-06	ENSRNOG00000015275	Ska1	spindle and kinetochore associated complex subunit 1 [Source:RGD Symbol;Acc:1310784]	0.959011	1.25199	1.15433	0.189139	0.335137	0.269773	4.23819	2.08345	up
GO:0051301	cell division	biological_process	4	1.69589e-06	ENSRNOG00000015529	Cdca3	cell division cycle associated 3 [Source:RGD Symbol;Acc:1359093]	5.65793	4.44468	7.07201	1.26515	1.83549	1.52556	3.71247	1.89238	up
GO:0051301	cell division	biological_process	4	1.69589e-06	ENSRNOG00000016377	Cep55	centrosomal protein 55 [Source:RGD Symbol;Acc:1305340]	3.59722	2.12663	4.33885	0.798509	1.25879	0.894393	3.40913	1.7694	up
GO:0051301	cell division	biological_process	4	1.69589e-06	ENSRNOG00000017804	Septin1	septin 1 [Source:RGD Symbol;Acc:1307216]	7.72546	7.45364	6.1084	17.1919	24.1984	18.165	0.357441	-1.48422	down
GO:0051301	cell division	biological_process	4	1.69589e-06	ENSRNOG00000018207	Dynlt1	dynein light chain Tctex-type 1 [Source:RGD Symbol;Acc:620261]	53.7489	54.2063	49.4857	25.0504	26.5222	22.9987	2.11128	1.07812	up
GO:0051301	cell division	biological_process	4	1.69589e-06	ENSRNOG00000020013	Psrc1	proline and serine rich coiled-coil 1 [Source:RGD Symbol;Acc:1585037]	1.243	0.777389	1.0382	0.359207	0.30163	0.423479	2.82075	1.49608	up
GO:0051301	cell division	biological_process	4	1.69589e-06	ENSRNOG00000021713	Kif18b	kinesin family member 18B [Source:RGD Symbol;Acc:1310360]	1.90372	1.63985	1.90235	0.405022	0.904329	0.678711	2.73931	1.45381	up
GO:0051301	cell division	biological_process	4	1.69589e-06	ENSRNOG00000024178	Cenpt	centromere protein T [Source:RGD Symbol;Acc:1309383]	2.15047	2.86883	2.78762	0.86109	1.29611	1.35946	2.21998	1.15055	up
GO:0051301	cell division	biological_process	4	1.69589e-06	ENSRNOG00000025302	Cdca2	cell division cycle associated 2 [Source:RGD Symbol;Acc:1311003]	2.0719	1.78042	2.27137	0.669364	0.89068	0.785936	2.61029	1.38421	up
GO:0051301	cell division	biological_process	4	1.69589e-06	ENSRNOG00000027787	Cdc6	cell division cycle 6 [Source:RGD Symbol;Acc:1309157]	1.46241	1.4578	1.85542	0.32834	0.62808	0.458393	3.37545	1.75508	up
GO:0051301	cell division	biological_process	4	1.69589e-06	ENSRNOG00000028415	Cdc20	cell division cycle 20 [Source:RGD Symbol;Acc:620477]	8.20218	8.18058	9.39277	1.63592	3.33288	2.76729	3.33185	1.73632	up
GO:0051301	cell division	biological_process	4	1.69589e-06	ENSRNOG00000031431	Cdca8	cell division cycle associated 8 [Source:RGD Symbol;Acc:1566306]	5.85253	6.03798	6.4519	2.3721	2.89422	2.85415	2.25879	1.17555	up
GO:0051301	cell division	biological_process	4	1.69589e-06	ENSRNOG00000032516	AABR07049223		3.42191	5.62787	7.49364	2.07595	1.45049	2.12212	2.92878	1.5503	up
GO:0051301	cell division	biological_process	4	1.69589e-06	ENSRNOG00000037211	Kif14	kinesin family member 14 [Source:RGD Symbol;Acc:1310650]	0.408599	0.514553	0.502817	0.144096	0.129417	0.139755	3.45047	1.78679	up
GO:0051301	cell division	biological_process	4	1.69589e-06	ENSRNOG00000042561	Cks1b	CDC28 protein kinase regulatory subunit 1B [Source:RGD Symbol;Acc:1561797]	9.1525	9.15957	11.4193	3.22174	4.03177	2.93054	2.9194	1.54567	up
GO:0051301	cell division	biological_process	4	1.69589e-06	ENSRNOG00000042944	Cenpw	centromere protein W [Source:RGD Symbol;Acc:1593465]	2.25586	2.53821	3.03228	0.652178	0.431898	0.267371	5.79109	2.53384	up
GO:0051301	cell division	biological_process	4	1.69589e-06	ENSRNOG00000058539	Ccnb1	cyclin B1 [Source:RGD Symbol;Acc:2291]	6.84248	5.36905	7.00748	1.32879	2.37311	1.92021	3.41846	1.77335	up
GO:0048407	platelet-derived growth factor binding	molecular_function	6	1.70257e-06	ENSRNOG00000001249	Col6a1	collagen type VI alpha 1 chain [Source:RGD Symbol;Acc:1565398]	133.697	116.137	100.859	46.125	44.8447	58.8249	2.34116	1.22722	up
GO:0048407	platelet-derived growth factor binding	molecular_function	6	1.70257e-06	ENSRNOG00000002244	Pdgfra	platelet derived growth factor receptor alpha [Source:RGD Symbol;Acc:3284]	10.7913	10.4928	10.1398	22.5292	21.8926	24.1598	0.458196	-1.12596	down
GO:0048407	platelet-derived growth factor binding	molecular_function	6	1.70257e-06	ENSRNOG00000003357	Col3a1	collagen type III alpha 1 chain [Source:RGD Symbol;Acc:71029]	773.166	628.281	469.974	156.474	148.568	159.465	4.02884	2.01036	up
GO:0048407	platelet-derived growth factor binding	molecular_function	6	1.70257e-06	ENSRNOG00000003897	Col1a1	collagen type I alpha 1 chain [Source:RGD Symbol;Acc:61817]	330.164	210.993	127.588	21.9343	20.0594	21.0288	10.6112	3.40752	up
GO:0048407	platelet-derived growth factor binding	molecular_function	6	1.70257e-06	ENSRNOG00000008749	Col5a1	collagen type V alpha 1 chain [Source:RGD Symbol;Acc:70920]	26.8905	21.3001	17.3892	7.63965	8.60063	7.95309	2.71065	1.43864	up
GO:0048407	platelet-derived growth factor binding	molecular_function	6	1.70257e-06	ENSRNOG00000016281	Col4a1	collagen type IV alpha 1 chain [Source:RGD Symbol;Acc:1307148]	228.604	293.978	253.367	78.1782	93.3833	113.433	2.72268	1.44503	up
GO:0048407	platelet-derived growth factor binding	molecular_function	6	1.70257e-06	ENSRNOG00000018461	Pdgfrb	platelet derived growth factor receptor beta [Source:RGD Symbol;Acc:3285]	29.9477	33.1625	27.8463	12.2108	11.6934	13.6546	2.42171	1.27603	up
GO:0006935	chemotaxis	biological_process	5	2.0037e-06	ENSRNOG00000000239	Ccl7	C-C motif chemokine ligand 7 [Source:RGD Symbol;Acc:1359152]	14.4232	11.1589	18.1968	0.946133	0.831492	2.17106	11.087	3.47079	up
GO:0006935	chemotaxis	biological_process	5	2.0037e-06	ENSRNOG00000002244	Pdgfra	platelet derived growth factor receptor alpha [Source:RGD Symbol;Acc:3284]	10.7913	10.4928	10.1398	22.5292	21.8926	24.1598	0.458196	-1.12596	down
GO:0006935	chemotaxis	biological_process	5	2.0037e-06	ENSRNOG00000006311	Ccr9	C-C motif chemokine receptor 9 [Source:RGD Symbol;Acc:628750]	0.257415	0.243861	0.157072	0.830937	1.15195	0.453854	0.270175	-1.88803	down
GO:0006935	chemotaxis	biological_process	5	2.0037e-06	ENSRNOG00000006620	Xcr1	X-C motif chemokine receptor 1 [Source:RGD Symbol;Acc:1311480]	1.18516	1.08826	0.853155	0.531912	0.487721	0.484413	2.07878	1.05573	up
GO:0006935	chemotaxis	biological_process	5	2.0037e-06	ENSRNOG00000006736	Ccr3	C-C motif chemokine receptor 3 [Source:RGD Symbol;Acc:620593]	0.551225	0.302268	0.337885	1.23779	0.699775	0.888156	0.421619	-1.24599	down
GO:0006935	chemotaxis	biological_process	5	2.0037e-06	ENSRNOG00000007159	Ccl2	C-C motif chemokine ligand 2 [Source:RGD Symbol;Acc:3645]	37.7066	18.9936	41.8423	1.20024	1.4775	2.90705	17.6448	4.14117	up
GO:0006935	chemotaxis	biological_process	5	2.0037e-06	ENSRNOG00000007335	Ccl11	C-C motif chemokine ligand 11 [Source:RGD Symbol;Acc:3644]	3.34409	1.3286	2.39904	6.15745	3.9376	18.2383	0.249591	-2.00236	down
GO:0006935	chemotaxis	biological_process	5	2.0037e-06	ENSRNOG00000010898	Prok2	prokineticin 2 [Source:RGD Symbol;Acc:620280]	0.091248	0	0	0.839639	0.365563	0.909689	0.0431455	-4.53465	down
GO:0006935	chemotaxis	biological_process	5	2.0037e-06	ENSRNOG00000010906	Ccl5	C-C motif chemokine ligand 5 [Source:RGD Symbol;Acc:69069]	33.6073	45.533	17.0812	161.621	269.977	147.801	0.166071	-2.59013	down
GO:0006935	chemotaxis	biological_process	5	2.0037e-06	ENSRNOG00000011478	Ackr4	atypical chemokine receptor 4 [Source:RGD Symbol;Acc:1596453]	3.742	6.72369	4.6503	10.6668	9.95579	14.6032	0.429117	-1.22056	down
GO:0006935	chemotaxis	biological_process	5	2.0037e-06	ENSRNOG00000013231	Ptafr	platelet-activating factor receptor [Source:RGD Symbol;Acc:61897]	11.0138	10.7414	8.49307	4.64952	3.76824	5.12655	2.23329	1.15917	up
GO:0006935	chemotaxis	biological_process	5	2.0037e-06	ENSRNOG00000014269	Cxcr2	C-X-C motif chemokine receptor 2 [Source:RGD Symbol;Acc:2906]	2.28515	1.28783	1.53123	4.02702	2.16233	5.47115	0.437735	-1.19187	down
GO:0006935	chemotaxis	biological_process	5	2.0037e-06	ENSRNOG00000015992	Ccl20	C-C motif chemokine ligand 20 [Source:RGD Symbol;Acc:3646]	3.55187	1.52624	2.52854	0.934769	1.07933	0.51172	3.01156	1.59051	up
GO:0006935	chemotaxis	biological_process	5	2.0037e-06	ENSRNOG00000016278	Ccl17	C-C motif chemokine ligand 17 [Source:RGD Symbol;Acc:619924]	3.89019	6.53501	5.24364	1.31455	3.29401	1.16464	2.71406	1.44045	up
GO:0006935	chemotaxis	biological_process	5	2.0037e-06	ENSRNOG00000016535	Ccl22	C-C motif chemokine ligand 22 [Source:RGD Symbol;Acc:619933]	0.579045	2.03706	1.27757	0.082517	0.590059	0.297163	4.01517	2.00546	up
GO:0006935	chemotaxis	biological_process	5	2.0037e-06	ENSRNOG00000018461	Pdgfrb	platelet derived growth factor receptor beta [Source:RGD Symbol;Acc:3285]	29.9477	33.1625	27.8463	12.2108	11.6934	13.6546	2.42171	1.27603	up
GO:0006935	chemotaxis	biological_process	5	2.0037e-06	ENSRNOG00000021851	Ccl1	C-C motif chemokine ligand 1 [Source:RGD Symbol;Acc:1586495]	1.29096	0.891293	0.828182	0.159979	0	0	18.8177	4.23402	up
GO:0006935	chemotaxis	biological_process	5	2.0037e-06	ENSRNOG00000022298	Cxcl11	C-X-C motif chemokine ligand 11 [Source:RGD Symbol;Acc:727827]	0.612395	0.600572	0.531235	0.05833	0.123484	0.076764	6.74536	2.7539	up
GO:0006935	chemotaxis	biological_process	5	2.0037e-06	ENSRNOG00000029768	Ccl12	chemokine (C-C motif) ligand 12 [Source:RGD Symbol;Acc:1309255]	6.0007	2.47451	2.57848	0	0.075135	0.603588	16.286	4.02556	up
GO:0006935	chemotaxis	biological_process	5	2.0037e-06	ENSRNOG00000038126	Defb3	beta-defensin 3 [Source:RGD Symbol;Acc:1589572]	2.8242	1.80169	2.32766	0.446516	0.287194	0.192905	7.50425	2.90771	up
GO:0006935	chemotaxis	biological_process	5	2.0037e-06	ENSRNOG00000043342	LOC290595	hypothetical gene supported by AF152002 [Source:RGD Symbol;Acc:1566160]	0.495846	0.709836	0	0.873931	12.6402	1.47192	0.0804534	-3.6357	down
GO:0009617	response to bacterium	biological_process	7	2.02887e-06	ENSRNOG00000002052	Ccdc80	coiled-coil domain containing 80 [Source:RGD Symbol;Acc:69421]	75.5538	48.2748	95.7677	28.6002	19.8306	18.9171	3.26063	1.70515	up
GO:0009617	response to bacterium	biological_process	7	2.02887e-06	ENSRNOG00000003486	Mnda	myeloid cell nuclear differentiation antigen [Source:RGD Symbol;Acc:1306089]	26.8462	15.6126	28.5889	10.6693	7.6067	7.79271	2.7254	1.44647	up
GO:0009617	response to bacterium	biological_process	7	2.02887e-06	ENSRNOG00000003969	Fam20a	FAM20A, golgi associated secretory pathway pseudokinase [Source:RGD Symbol;Acc:1306364]	2.87589	2.65211	2.3832	5.94228	6.53379	6.99995	0.406202	-1.29973	down
GO:0009617	response to bacterium	biological_process	7	2.02887e-06	ENSRNOG00000006151	Reg3b	regenerating family member 3 beta [Source:RGD Symbol;Acc:3254]	6.90006	0.569677	5.24778	0	0	0	42391.7	15.3715	up
GO:0009617	response to bacterium	biological_process	7	2.02887e-06	ENSRNOG00000006579	Reg3g	regenerating family member 3 gamma [Source:RGD Symbol;Acc:3256]	3.69088	0.080361	3.74511	0	0	0	25054.5	14.6128	up
GO:0009617	response to bacterium	biological_process	7	2.02887e-06	ENSRNOG00000007159	Ccl2	C-C motif chemokine ligand 2 [Source:RGD Symbol;Acc:3645]	37.7066	18.9936	41.8423	1.20024	1.4775	2.90705	17.6448	4.14117	up
GO:0009617	response to bacterium	biological_process	7	2.02887e-06	ENSRNOG00000007200	Ikzf3	IKAROS family zinc finger 3 [Source:RGD Symbol;Acc:1307024]	0.669919	1.42968	0.393927	1.9738	4.11917	3.32225	0.26484	-1.91681	down
GO:0009617	response to bacterium	biological_process	7	2.02887e-06	ENSRNOG00000010278	Il6	interleukin 6 [Source:RGD Symbol;Acc:2901]	3.16485	2.11915	11.0231	0.116354	0.115796	0.224046	35.7458	5.1597	up
GO:0009617	response to bacterium	biological_process	7	2.02887e-06	ENSRNOG00000010805	Fabp4	fatty acid binding protein 4 [Source:RGD Symbol;Acc:69309]	104.025	71.6099	73.0857	29.3057	12.6426	16.5079	4.25481	2.0891	up
GO:0009617	response to bacterium	biological_process	7	2.02887e-06	ENSRNOG00000011917	Cd79b	CD79b molecule [Source:RGD Symbol;Acc:620012]	6.72672	11.9204	3.28746	16.4707	21.2954	22.7769	0.362298	-1.46475	down
GO:0009617	response to bacterium	biological_process	7	2.02887e-06	ENSRNOG00000012458	Cyp2e1	cytochrome P450, family 2, subfamily e, polypeptide 1 [Source:RGD Symbol;Acc:2475]	1.59029	2.0422	0.503894	11.7452	14.7012	19.1101	0.090797	-3.46121	down
GO:0009617	response to bacterium	biological_process	7	2.02887e-06	ENSRNOG00000013395	Pglyrp1	peptidoglycan recognition protein 1 [Source:RGD Symbol;Acc:621429]	1.6073	1.49278	0.988926	2.85277	3.31373	3.56247	0.420292	-1.25054	down
GO:0009617	response to bacterium	biological_process	7	2.02887e-06	ENSRNOG00000013973	Lcn2	lipocalin 2 [Source:RGD Symbol;Acc:69408]	1594.83	895.005	2315.86	265.381	192.039	198.689	7.32455	2.87274	up
GO:0009617	response to bacterium	biological_process	7	2.02887e-06	ENSRNOG00000015408	Vil1	villin 1 [Source:RGD Symbol;Acc:1307048]	0.084717	0.738391	0.326871	1.03639	1.03462	1.77358	0.299117	-1.74122	down
GO:0009617	response to bacterium	biological_process	7	2.02887e-06	ENSRNOG00000020945	Ms4a1	membrane spanning 4-domains A1 [Source:RGD Symbol;Acc:1311999]	4.43913	5.71531	1.88153	8.95523	11.7632	12.6719	0.360463	-1.47208	down
GO:0009617	response to bacterium	biological_process	7	2.02887e-06	ENSRNOG00000021276	Bmp2	bone morphogenetic protein 2 [Source:RGD Symbol;Acc:2211]	3.40519	7.43167	5.53057	2.54594	1.70193	2.53326	2.41367	1.27123	up
GO:0009617	response to bacterium	biological_process	7	2.02887e-06	ENSRNOG00000022523	Fkbp5	FKBP prolyl isomerase 5 [Source:RGD Symbol;Acc:1309155]	10.6739	10.2676	11.1153	18.0189	24.3249	23.222	0.488927	-1.03231	down
GO:0009617	response to bacterium	biological_process	7	2.02887e-06	ENSRNOG00000027380	Upk1b	uroplakin 1B [Source:RGD Symbol;Acc:1307806]	39.9999	29.1193	51.1765	23.4898	15.1861	9.59432	2.49213	1.31738	up
GO:0009617	response to bacterium	biological_process	7	2.02887e-06	ENSRNOG00000029047	Cubn	cubilin [Source:RGD Symbol;Acc:68355]	0.177492	0.151215	0.11754	0.324175	0.252624	0.366809	0.472915	-1.08035	down
GO:0009617	response to bacterium	biological_process	7	2.02887e-06	ENSRNOG00000029342	Scn7a	sodium voltage-gated channel alpha subunit 7 [Source:RGD Symbol;Acc:61922]	34.779	50.2463	29.3145	11.5574	9.24312	13.5523	3.32839	1.73483	up
GO:0009617	response to bacterium	biological_process	7	2.02887e-06	ENSRNOG00000032247	Bank1	B-cell scaffold protein with ankyrin repeats 1 [Source:RGD Symbol;Acc:1564639]	2.10581	4.34988	1.90684	6.38607	5.80295	8.67878	0.400739	-1.31927	down
GO:0009617	response to bacterium	biological_process	7	2.02887e-06	ENSRNOG00000032959	Adh7	alcohol dehydrogenase 7 (class IV), mu or sigma polypeptide [Source:RGD Symbol;Acc:621638]	2.43511	3.44985	1.51791	5.94367	5.77427	4.45965	0.457601	-1.12784	down
GO:0009617	response to bacterium	biological_process	7	2.02887e-06	ENSRNOG00000033564	Cfd	complement factor D [Source:RGD Symbol;Acc:2498]	19.8564	16.2343	14.3704	10.3933	4.70205	6.43942	2.34324	1.22851	up
GO:0005518	collagen binding	molecular_function	5	2.15802e-06	ENSRNOG00000001249	Col6a1	collagen type VI alpha 1 chain [Source:RGD Symbol;Acc:1565398]	133.697	116.137	100.859	46.125	44.8447	58.8249	2.34116	1.22722	up
GO:0005518	collagen binding	molecular_function	5	2.15802e-06	ENSRNOG00000001254	Col6a2	collagen type VI alpha 2 chain [Source:RGD Symbol;Acc:1305585]	151.096	132.236	115.094	51.6944	53.0243	62.9982	2.37559	1.24829	up
GO:0005518	collagen binding	molecular_function	5	2.15802e-06	ENSRNOG00000002461	Nid1	nidogen 1 [Source:RGD Symbol;Acc:3178]	27.7591	33.8089	25.3969	7.0868	7.3753	8.23495	3.83155	1.93793	up
GO:0005518	collagen binding	molecular_function	5	2.15802e-06	ENSRNOG00000004610	Lum	lumican [Source:RGD Symbol;Acc:620984]	35.0811	13.503	14.0309	4.19002	2.93747	2.81793	6.29586	2.6544	up
GO:0005518	collagen binding	molecular_function	5	2.15802e-06	ENSRNOG00000006723	Itga11	integrin subunit alpha 11 [Source:RGD Symbol;Acc:1311711]	2.02577	0.948998	1.43154	0.445333	0.566447	0.898136	2.30707	1.20606	up
GO:0005518	collagen binding	molecular_function	5	2.15802e-06	ENSRNOG00000012216	Tgfbi	transforming growth factor, beta induced [Source:RGD Symbol;Acc:620017]	41.0144	25.3631	33.6917	15.6014	15.5471	14.7259	2.18138	1.12524	up
GO:0005518	collagen binding	molecular_function	5	2.15802e-06	ENSRNOG00000012840	Sparc	secreted protein acidic and cysteine rich [Source:RGD Symbol;Acc:3742]	1859.4	1712.29	1518.68	726.387	694.718	834.72	2.25655	1.17412	up
GO:0005518	collagen binding	molecular_function	5	2.15802e-06	ENSRNOG00000014426	Lox	lysyl oxidase [Source:RGD Symbol;Acc:3015]	56.109	59.4426	61.512	17.4454	17.4535	21.6606	3.13057	1.64643	up
GO:0005518	collagen binding	molecular_function	5	2.15802e-06	ENSRNOG00000015410	Aspnl1	asporin-like 1 [Source:RGD Symbol;Acc:9278606]	10.0883	6.71144	5.45763	1.48248	0.809754	1.37603	6.06754	2.60111	up
GO:0005518	collagen binding	molecular_function	5	2.15802e-06	ENSRNOG00000021155	Ctsk	cathepsin K [Source:RGD Symbol;Acc:61810]	41.0334	42.676	29.5982	11.0648	7.58504	6.87196	4.43964	2.15044	up
GO:0005518	collagen binding	molecular_function	5	2.15802e-06	ENSRNOG00000024631	Chadl	chondroadherin-like [Source:RGD Symbol;Acc:6504353]	0.626034	0.883143	0.749265	1.39616	1.88591	1.63064	0.459714	-1.12119	down
GO:0005518	collagen binding	molecular_function	5	2.15802e-06	ENSRNOG00000025001	Pcolce	procollagen C-endopeptidase enhancer [Source:RGD Symbol;Acc:3270]	91.1937	57.8994	71.8722	22.2554	16.594	23.1289	3.5652	1.83398	up
GO:0005518	collagen binding	molecular_function	5	2.15802e-06	ENSRNOG00000030187	Mmp12	matrix metallopeptidase 12 [Source:RGD Symbol;Acc:620195]	23.6153	23.6938	16.196	2.3016	0.393955	0.799687	18.169	4.18341	up
GO:0005518	collagen binding	molecular_function	5	2.15802e-06	ENSRNOG00000046848	PCOLCE2	procollagen C-endopeptidase enhancer 2 [Source:RGD Symbol;Acc:1595195]	5.81048	6.81291	4.70162	20.8649	18.564	20.1305	0.290887	-1.78147	down
GO:0005518	collagen binding	molecular_function	5	2.15802e-06	ENSRNOG00000050431	Aspn	asporin [Source:RGD Symbol;Acc:1549776]	9.79917	6.51414	5.23546	1.07928	0.840526	0.925104	7.5745	2.92115	up
GO:0005518	collagen binding	molecular_function	5	2.15802e-06	ENSRNOG00000058111	Itga2	integrin subunit alpha 2 [Source:RGD Symbol;Acc:621632]	2.02287	2.41017	1.73864	0.541871	0.886078	0.645843	2.97604	1.57339	up
GO:0008009	chemokine activity	molecular_function	8	2.29819e-06	ENSRNOG00000000239	Ccl7	C-C motif chemokine ligand 7 [Source:RGD Symbol;Acc:1359152]	14.4232	11.1589	18.1968	0.946133	0.831492	2.17106	11.087	3.47079	up
GO:0008009	chemokine activity	molecular_function	8	2.29819e-06	ENSRNOG00000007159	Ccl2	C-C motif chemokine ligand 2 [Source:RGD Symbol;Acc:3645]	37.7066	18.9936	41.8423	1.20024	1.4775	2.90705	17.6448	4.14117	up
GO:0008009	chemokine activity	molecular_function	8	2.29819e-06	ENSRNOG00000007335	Ccl11	C-C motif chemokine ligand 11 [Source:RGD Symbol;Acc:3644]	3.34409	1.3286	2.39904	6.15745	3.9376	18.2383	0.249591	-2.00236	down
GO:0008009	chemokine activity	molecular_function	8	2.29819e-06	ENSRNOG00000010906	Ccl5	C-C motif chemokine ligand 5 [Source:RGD Symbol;Acc:69069]	33.6073	45.533	17.0812	161.621	269.977	147.801	0.166071	-2.59013	down
GO:0008009	chemokine activity	molecular_function	8	2.29819e-06	ENSRNOG00000015992	Ccl20	C-C motif chemokine ligand 20 [Source:RGD Symbol;Acc:3646]	3.55187	1.52624	2.52854	0.934769	1.07933	0.51172	3.01156	1.59051	up
GO:0008009	chemokine activity	molecular_function	8	2.29819e-06	ENSRNOG00000016278	Ccl17	C-C motif chemokine ligand 17 [Source:RGD Symbol;Acc:619924]	3.89019	6.53501	5.24364	1.31455	3.29401	1.16464	2.71406	1.44045	up
GO:0008009	chemokine activity	molecular_function	8	2.29819e-06	ENSRNOG00000016535	Ccl22	C-C motif chemokine ligand 22 [Source:RGD Symbol;Acc:619933]	0.579045	2.03706	1.27757	0.082517	0.590059	0.297163	4.01517	2.00546	up
GO:0008009	chemokine activity	molecular_function	8	2.29819e-06	ENSRNOG00000021851	Ccl1	C-C motif chemokine ligand 1 [Source:RGD Symbol;Acc:1586495]	1.29096	0.891293	0.828182	0.159979	0	0	18.8177	4.23402	up
GO:0008009	chemokine activity	molecular_function	8	2.29819e-06	ENSRNOG00000022298	Cxcl11	C-X-C motif chemokine ligand 11 [Source:RGD Symbol;Acc:727827]	0.612395	0.600572	0.531235	0.05833	0.123484	0.076764	6.74536	2.7539	up
GO:0008009	chemokine activity	molecular_function	8	2.29819e-06	ENSRNOG00000029768	Ccl12	chemokine (C-C motif) ligand 12 [Source:RGD Symbol;Acc:1309255]	6.0007	2.47451	2.57848	0	0.075135	0.603588	16.286	4.02556	up
GO:0008009	chemokine activity	molecular_function	8	2.29819e-06	ENSRNOG00000031162	Ccl24	C-C motif chemokine ligand 24 [Source:RGD Symbol;Acc:1310245]	5.13001	4.48235	6.31795	1.67853	1.29167	1.65069	3.44746	1.78553	up
GO:0008009	chemokine activity	molecular_function	8	2.29819e-06	ENSRNOG00000034290	Ccl21	C-C motif chemokine ligand 21 [Source:RGD Symbol;Acc:1311996]	171.913	158.057	123.877	70.7503	53.7025	41.4424	2.73575	1.45194	up
GO:0008009	chemokine activity	molecular_function	8	2.29819e-06	ENSRNOG00000043342	LOC290595	hypothetical gene supported by AF152002 [Source:RGD Symbol;Acc:1566160]	0.495846	0.709836	0	0.873931	12.6402	1.47192	0.0804534	-3.6357	down
GO:0000278	mitotic cell cycle	biological_process	5	3.66399e-06	ENSRNOG00000000632	Cdk1	cyclin-dependent kinase 1 [Source:RGD Symbol;Acc:2319]	13.2074	15.3817	18.7413	2.64068	4.12548	3.85137	4.45776	2.15632	up
GO:0000278	mitotic cell cycle	biological_process	5	3.66399e-06	ENSRNOG00000003388	Cenpf	centromere protein F [Source:RGD Symbol;Acc:628667]	1.94174	2.03426	1.96379	0.832697	0.856453	0.770449	2.41495	1.27199	up
GO:0000278	mitotic cell cycle	biological_process	5	3.66399e-06	ENSRNOG00000007805	Mybl2	MYB proto-oncogene like 2 [Source:RGD Symbol;Acc:1308474]	1.81447	1.64676	2.31345	0.283142	0.873092	0.673025	3.15684	1.65848	up
GO:0000278	mitotic cell cycle	biological_process	5	3.66399e-06	ENSRNOG00000009339	Cenpe	centromere protein E [Source:RGD Symbol;Acc:1307115]	1.70505	1.63012	1.94618	0.340447	0.834865	0.456197	3.2371	1.6947	up
GO:0000278	mitotic cell cycle	biological_process	5	3.66399e-06	ENSRNOG00000010454	Ccno	cyclin O [Source:RGD Symbol;Acc:1565217]	1.93659	2.91847	2.11728	0.22515	0.591884	0.468791	5.42246	2.43895	up
GO:0000278	mitotic cell cycle	biological_process	5	3.66399e-06	ENSRNOG00000011654	Plk4	polo-like kinase 4 [Source:RGD Symbol;Acc:1305390]	3.88341	3.27569	3.42057	1.44747	1.29323	1.59632	2.43939	1.28652	up
GO:0000278	mitotic cell cycle	biological_process	5	3.66399e-06	ENSRNOG00000012835	Espl1	extra spindle pole bodies like 1, separase [Source:RGD Symbol;Acc:1306266]	1.25076	1.06367	1.61809	0.50097	0.851101	0.511543	2.11016	1.07735	up
GO:0000278	mitotic cell cycle	biological_process	5	3.66399e-06	ENSRNOG00000015160	Gem	GTP binding protein overexpressed in skeletal muscle [Source:RGD Symbol;Acc:1307386]	12.0052	17.1122	20.1978	5.46587	5.9855	6.99589	2.67331	1.41863	up
GO:0000278	mitotic cell cycle	biological_process	5	3.66399e-06	ENSRNOG00000015275	Ska1	spindle and kinetochore associated complex subunit 1 [Source:RGD Symbol;Acc:1310784]	0.959011	1.25199	1.15433	0.189139	0.335137	0.269773	4.23819	2.08345	up
GO:0000278	mitotic cell cycle	biological_process	5	3.66399e-06	ENSRNOG00000015308	Pbk	PDZ binding kinase [Source:RGD Symbol;Acc:1309565]	3.90629	3.4062	4.57702	0.873062	1.1468	1.03278	3.89483	1.96156	up
GO:0000278	mitotic cell cycle	biological_process	5	3.66399e-06	ENSRNOG00000017209	Tubb3	tubulin, beta 3 class III [Source:RGD Symbol;Acc:628595]	2.15739	1.01563	1.76687	0.172949	0.141911	0.209047	9.42893	3.23709	up
GO:0000278	mitotic cell cycle	biological_process	5	3.66399e-06	ENSRNOG00000018371	Tubb6	tubulin, beta 6 class V [Source:RGD Symbol;Acc:1305887]	51.3781	46.6999	62.9911	21.832	20.597	17.835	2.67272	1.41831	up
GO:0000278	mitotic cell cycle	biological_process	5	3.66399e-06	ENSRNOG00000018815	Plk1	polo-like kinase 1 [Source:RGD Symbol;Acc:3352]	4.81308	4.27321	4.3835	1.00901	1.56844	1.31794	3.45788	1.78989	up
GO:0000278	mitotic cell cycle	biological_process	5	3.66399e-06	ENSRNOG00000018851	Ppp2r2b	protein phosphatase 2, regulatory subunit B, beta [Source:RGD Symbol;Acc:631441]	3.16847	2.77345	3.60839	1.62792	1.1151	0.816664	2.68291	1.4238	up
GO:0000278	mitotic cell cycle	biological_process	5	3.66399e-06	ENSRNOG00000021669	Mybl1	MYB proto-oncogene like 1 [Source:RGD Symbol;Acc:1306940]	1.97535	2.86022	1.14976	0.840099	0.579076	0.693685	2.83281	1.50223	up
GO:0000278	mitotic cell cycle	biological_process	5	3.66399e-06	ENSRNOG00000021713	Kif18b	kinesin family member 18B [Source:RGD Symbol;Acc:1310360]	1.90372	1.63985	1.90235	0.405022	0.904329	0.678711	2.73931	1.45381	up
GO:0000278	mitotic cell cycle	biological_process	5	3.66399e-06	ENSRNOG00000024178	Cenpt	centromere protein T [Source:RGD Symbol;Acc:1309383]	2.15047	2.86883	2.78762	0.86109	1.29611	1.35946	2.21998	1.15055	up
GO:0000278	mitotic cell cycle	biological_process	5	3.66399e-06	ENSRNOG00000027787	Cdc6	cell division cycle 6 [Source:RGD Symbol;Acc:1309157]	1.46241	1.4578	1.85542	0.32834	0.62808	0.458393	3.37545	1.75508	up
GO:0000278	mitotic cell cycle	biological_process	5	3.66399e-06	ENSRNOG00000032699	Ttyh1	tweety family member 1 [Source:RGD Symbol;Acc:1310103]	0.26216	0.287879	0.123177	0.450375	0.597256	0.514098	0.431071	-1.214	down
GO:0000278	mitotic cell cycle	biological_process	5	3.66399e-06	ENSRNOG00000042944	Cenpw	centromere protein W [Source:RGD Symbol;Acc:1593465]	2.25586	2.53821	3.03228	0.652178	0.431898	0.267371	5.79109	2.53384	up
GO:0000278	mitotic cell cycle	biological_process	5	3.66399e-06	ENSRNOG00000046151	Tubb1	tubulin, beta 1 class VI [Source:RGD Symbol;Acc:1589557]	0.11415	0.15751	0.218594	0.872419	0.813423	0.783425	0.198542	-2.33248	down
GO:0000278	mitotic cell cycle	biological_process	5	3.66399e-06	ENSRNOG00000048169	Tuba8	tubulin, alpha 8 [Source:RGD Symbol;Acc:1566041]	3.55351	3.77764	3.98149	0.363944	0.114367	0.307022	14.4049	3.84849	up
GO:0000278	mitotic cell cycle	biological_process	5	3.66399e-06	ENSRNOG00000054286	Rrm2	ribonucleotide reductase regulatory subunit M2 [Source:RGD Symbol;Acc:1598310]	8.16388	9.93891	11.9198	2.25539	2.08556	3.09141	4.03944	2.01416	up
GO:0000278	mitotic cell cycle	biological_process	5	3.66399e-06	ENSRNOG00000054474	Mastl	microtubule associated serine/threonine kinase-like [Source:MGI Symbol;Acc:MGI:1914371]	0.744345	0.932889	1.1736	0.366977	0.31406	0.35695	2.7465	1.45759	up
GO:0000278	mitotic cell cycle	biological_process	5	3.66399e-06	ENSRNOG00000058539	Ccnb1	cyclin B1 [Source:RGD Symbol;Acc:2291]	6.84248	5.36905	7.00748	1.32879	2.37311	1.92021	3.41846	1.77335	up
GO:0043408	regulation of MAPK cascade	biological_process	10	3.7653e-06	ENSRNOG00000002418	Tgfb2	transforming growth factor, beta 2 [Source:RGD Symbol;Acc:70491]	32.2616	34.4352	34.8496	12.3645	10.9716	12.4504	2.83756	1.50465	up
GO:0043408	regulation of MAPK cascade	biological_process	10	3.7653e-06	ENSRNOG00000002937	Ren	renin [Source:RGD Symbol;Acc:3554]	0.210662	0.122506	0	0	0	0	1110.56	10.1171	up
GO:0043408	regulation of MAPK cascade	biological_process	10	3.7653e-06	ENSRNOG00000002984	Bmp15	bone morphogenetic protein 15 [Source:RGD Symbol;Acc:70990]	0.45701	0.765327	0.542995	2.39819	2.9696	2.67733	0.219429	-2.18817	down
GO:0043408	regulation of MAPK cascade	biological_process	10	3.7653e-06	ENSRNOG00000007810	Gdf6	growth differentiation factor 6 [Source:RGD Symbol;Acc:620104]	0.222642	0.323762	0.898277	0.028828	0.075581	0.015319	12.0664	3.59292	up
GO:0043408	regulation of MAPK cascade	biological_process	10	3.7653e-06	ENSRNOG00000009867	Tgfb3	transforming growth factor, beta 3 [Source:RGD Symbol;Acc:3851]	28.04	20.6768	22.6266	8.0599	7.08636	6.45932	3.30208	1.72338	up
GO:0043408	regulation of MAPK cascade	biological_process	10	3.7653e-06	ENSRNOG00000013953	Ntrk1	neurotrophic receptor tyrosine kinase 1 [Source:RGD Symbol;Acc:620144]	0.089799	0.0959429	0.0319835	0.269543	0.411822	0.210092	0.244236	-2.03366	down
GO:0043408	regulation of MAPK cascade	biological_process	10	3.7653e-06	ENSRNOG00000014290	Grm1	glutamate metabotropic receptor 1 [Source:RGD Symbol;Acc:2742]	0.009912	0	0.015688	0.069331	0.104979	0.0226431	0.12998	-2.94364	down
GO:0043408	regulation of MAPK cascade	biological_process	10	3.7653e-06	ENSRNOG00000014320	Inhba	inhibin subunit beta A [Source:RGD Symbol;Acc:62074]	1.43305	0.871656	0.743097	0.170937	0.044034	0.019916	12.9756	3.69773	up
GO:0043408	regulation of MAPK cascade	biological_process	10	3.7653e-06	ENSRNOG00000016887	Hrh4	histamine receptor H4 [Source:RGD Symbol;Acc:620631]	0.195294	0.196548	0.02878	0	0	0	1402.07	10.4533	up
GO:0043408	regulation of MAPK cascade	biological_process	10	3.7653e-06	ENSRNOG00000018839	Ntrk2	neurotrophic receptor tyrosine kinase 2 [Source:RGD Symbol;Acc:3213]	2.74908	5.01041	5.1754	0.644865	1.09069	0.941283	4.83215	2.27267	up
GO:0043408	regulation of MAPK cascade	biological_process	10	3.7653e-06	ENSRNOG00000021294	Mstn	myostatin [Source:RGD Symbol;Acc:3115]	0.239236	0.420771	0.61312	0	0	0	4243.76	12.0511	up
GO:0043408	regulation of MAPK cascade	biological_process	10	3.7653e-06	ENSRNOG00000030155	Bmp8a	bone morphogenetic protein 8a [Source:RGD Symbol;Acc:1585858]	0.24594	0.142431	0.13281	0.675516	0.572486	0.397535	0.316724	-1.6587	down
GO:0043408	regulation of MAPK cascade	biological_process	10	3.7653e-06	ENSRNOG00000033209	Bmp8b	bone morphogenetic protein 8b [Source:RGD Symbol;Acc:1591873]	0.366519	0.45209	0.546395	1.03207	1.66145	1.31074	0.340888	-1.55263	down
GO:0043408	regulation of MAPK cascade	biological_process	10	3.7653e-06	ENSRNOG00000053232	Ror2	receptor tyrosine kinase-like orphan receptor 2 [Source:RGD Symbol;Acc:1305275]	3.70282	3.30952	2.45836	0.93753	0.843785	1.20048	3.17618	1.66729	up
GO:0043408	regulation of MAPK cascade	biological_process	10	3.7653e-06	ENSRNOG00000062030	Cers1	ceramide synthase 1 [Source:RGD Symbol;Acc:1305974]	0.441764	1.11004	0.488073	1.21572	1.53219	1.3981	0.49201	-1.02324	down
GO:0007160	cell-matrix adhesion	biological_process	6	3.88476e-06	ENSRNOG00000000341	Nid2	nidogen 2 [Source:RGD Symbol;Acc:1311685]	5.85374	5.92398	4.96026	2.31282	2.30347	2.63372	2.30869	1.20707	up
GO:0007160	cell-matrix adhesion	biological_process	6	3.88476e-06	ENSRNOG00000002461	Nid1	nidogen 1 [Source:RGD Symbol;Acc:3178]	27.7591	33.8089	25.3969	7.0868	7.3753	8.23495	3.83155	1.93793	up
GO:0007160	cell-matrix adhesion	biological_process	6	3.88476e-06	ENSRNOG00000002548	Tnn	tenascin N [Source:RGD Symbol;Acc:1306002]	3.51992	0.787354	1.0593	0.259756	0.338104	0.237335	6.42553	2.68382	up
GO:0007160	cell-matrix adhesion	biological_process	6	3.88476e-06	ENSRNOG00000003357	Col3a1	collagen type III alpha 1 chain [Source:RGD Symbol;Acc:71029]	773.166	628.281	469.974	156.474	148.568	159.465	4.02884	2.01036	up
GO:0007160	cell-matrix adhesion	biological_process	6	3.88476e-06	ENSRNOG00000006569	Itgb8	integrin subunit beta 8 [Source:RGD Symbol;Acc:1311374]	2.69064	1.81036	3.42008	1.06221	1.22856	0.71459	2.63565	1.39816	up
GO:0007160	cell-matrix adhesion	biological_process	6	3.88476e-06	ENSRNOG00000006723	Itga11	integrin subunit alpha 11 [Source:RGD Symbol;Acc:1311711]	2.02577	0.948998	1.43154	0.445333	0.566447	0.898136	2.30707	1.20606	up
GO:0007160	cell-matrix adhesion	biological_process	6	3.88476e-06	ENSRNOG00000008246	Emilin1	elastin microfibril interfacer 1 [Source:RGD Symbol;Acc:1311209]	33.8479	31.5242	28.4099	12.5544	13.2388	13.7678	2.37056	1.24523	up
GO:0007160	cell-matrix adhesion	biological_process	6	3.88476e-06	ENSRNOG00000014288	Fn1	fibronectin 1 [Source:RGD Symbol;Acc:2624]	280.945	248.379	229.735	57.4707	64.5711	77.3481	3.80691	1.92862	up
GO:0007160	cell-matrix adhesion	biological_process	6	3.88476e-06	ENSRNOG00000015036	Ccn2	cellular communication network factor 2 [Source:RGD Symbol;Acc:621392]	218.744	343.767	345.238	124.994	151.721	144.012	2.15757	1.10941	up
GO:0007160	cell-matrix adhesion	biological_process	6	3.88476e-06	ENSRNOG00000018865	Adamts12	ADAM metallopeptidase with thrombospondin type 1 motif, 12 [Source:RGD Symbol;Acc:1307323]	4.73114	7.17003	4.91418	1.22778	1.39158	1.85944	3.75443	1.90859	up
GO:0007160	cell-matrix adhesion	biological_process	6	3.88476e-06	ENSRNOG00000019445	Msln	mesothelin [Source:RGD Symbol;Acc:69333]	152.008	110.629	159.538	55.1951	30.864	26.1269	3.76317	1.91195	up
GO:0007160	cell-matrix adhesion	biological_process	6	3.88476e-06	ENSRNOG00000020525	Col5a3	collagen type V alpha 3 chain [Source:RGD Symbol;Acc:70922]	6.27947	4.20125	3.33351	1.45791	1.15799	1.30957	3.51913	1.81522	up
GO:0007160	cell-matrix adhesion	biological_process	6	3.88476e-06	ENSRNOG00000021569	Tiam1	T-cell lymphoma invasion and metastasis 1 [Source:RGD Symbol;Acc:1307455]	2.12158	2.24547	1.49218	0.584266	1.21954	1.06253	2.04415	1.0315	up
GO:0007160	cell-matrix adhesion	biological_process	6	3.88476e-06	ENSRNOG00000022309	Frem1	Fras1 related extracellular matrix 1 [Source:RGD Symbol;Acc:1306981]	1.56745	1.82675	0.915623	0.410153	0.33414	0.309213	4.09093	2.03243	up
GO:0007160	cell-matrix adhesion	biological_process	6	3.88476e-06	ENSRNOG00000023030	Cd96	CD96 molecule [Source:RGD Symbol;Acc:1565249]	0.917836	1.14257	0.850143	2.44321	4.01199	2.42128	0.327894	-1.6087	down
GO:0007160	cell-matrix adhesion	biological_process	6	3.88476e-06	ENSRNOG00000031475	Col16a1	collagen type XVI alpha 1 chain [Source:RGD Symbol;Acc:1310982]	57.2427	51.0177	56.7959	19.2783	19.235	17.3131	2.9566	1.56394	up
GO:0007160	cell-matrix adhesion	biological_process	6	3.88476e-06	ENSRNOG00000058111	Itga2	integrin subunit alpha 2 [Source:RGD Symbol;Acc:621632]	2.02287	2.41017	1.73864	0.541871	0.886078	0.645843	2.97604	1.57339	up
GO:0007160	cell-matrix adhesion	biological_process	6	3.88476e-06	ENSRNOG00000061230	L1cam	L1 cell adhesion molecule [Source:RGD Symbol;Acc:619777]	0.831666	0.83209	0.561794	2.66189	2.62247	1.37554	0.334171	-1.58134	down
GO:0004252	serine-type endopeptidase activity	molecular_function	8	5.09226e-06	ENSRNOG00000005515	Rhbdl3	rhomboid like 3 [Source:RGD Symbol;Acc:1311901]	9.37657	6.92596	20.658	4.73444	4.20402	4.75953	2.69825	1.43202	up
GO:0004252	serine-type endopeptidase activity	molecular_function	8	5.09226e-06	ENSRNOG00000009907	Mmp8	matrix metallopeptidase 8 [Source:RGD Symbol;Acc:631408]	2.00547	1.65031	0.763331	3.84607	1.99292	4.16718	0.44164	-1.17906	down
GO:0004252	serine-type endopeptidase activity	molecular_function	8	5.09226e-06	ENSRNOG00000010603	Gzma	granzyme A [Source:RGD Symbol;Acc:628640]	8.62104	9.97781	4.87209	37.3725	72.5884	41.9582	0.154496	-2.69436	down
GO:0004252	serine-type endopeptidase activity	molecular_function	8	5.09226e-06	ENSRNOG00000010661	Gzmk	granzyme K [Source:RGD Symbol;Acc:68401]	7.98123	11.2979	2.63631	40.0058	75.1209	36.9708	0.144088	-2.79498	down
GO:0004252	serine-type endopeptidase activity	molecular_function	8	5.09226e-06	ENSRNOG00000011796	C1r	complement C1r [Source:RGD Symbol;Acc:1309091]	123.094	95.9083	133.697	50.3805	41.8088	43.88	2.59206	1.3741	up
GO:0004252	serine-type endopeptidase activity	molecular_function	8	5.09226e-06	ENSRNOG00000011800	F3	coagulation factor III, tissue factor [Source:RGD Symbol;Acc:2587]	167.292	169.907	352.923	54.9981	53.3236	44.8062	4.50683	2.17211	up
GO:0004252	serine-type endopeptidase activity	molecular_function	8	5.09226e-06	ENSRNOG00000011971	C1s	complement C1s [Source:RGD Symbol;Acc:619983]	123.565	79.6933	122.779	33.0371	24.7081	21.0409	4.13826	2.04903	up
GO:0004252	serine-type endopeptidase activity	molecular_function	8	5.09226e-06	ENSRNOG00000012036	Pcsk5	proprotein convertase subtilisin/kexin type 5 [Source:RGD Symbol;Acc:620326]	9.04096	7.64478	5.71483	3.04202	2.71739	3.25211	2.48577	1.31369	up
GO:0004252	serine-type endopeptidase activity	molecular_function	8	5.09226e-06	ENSRNOG00000018611	Tpsb2	tryptase beta 2 [Source:RGD Symbol;Acc:3065]	34.027	7.33681	2.13233	0.969487	1.27184	2.36422	9.4443	3.23944	up
GO:0004252	serine-type endopeptidase activity	molecular_function	8	5.09226e-06	ENSRNOG00000020533	Htra1	HtrA serine peptidase 1 [Source:RGD Symbol;Acc:69235]	85.3305	79.1533	114.318	41.5745	38.9896	41.6878	2.28055	1.18938	up
GO:0004252	serine-type endopeptidase activity	molecular_function	8	5.09226e-06	ENSRNOG00000020563	Cma1	chymase 1 [Source:RGD Symbol;Acc:2365]	39.918	10.9509	5.28186	1.65773	1.49175	1.16244	13.0222	3.7029	up
GO:0004252	serine-type endopeptidase activity	molecular_function	8	5.09226e-06	ENSRNOG00000020625	Mcpt1	mast cell protease 2 [Source:RGD Symbol;Acc:621058]	12.8352	6.74173	9.87014	0.932975	0.814616	0.769753	11.6977	3.54815	up
GO:0004252	serine-type endopeptidase activity	molecular_function	8	5.09226e-06	ENSRNOG00000021619	Cela3b	chymotrypsin like elastase 3B [Source:RGD Symbol;Acc:1307819]	4.59201	1.0716	1.36544	0.246158	0.14853	0	17.8091	4.15455	up
GO:0004252	serine-type endopeptidase activity	molecular_function	8	5.09226e-06	ENSRNOG00000023858	Prss39	protease, serine, 39 [Source:RGD Symbol;Acc:1309276]	0.61737	0.670793	0.291965	1.21195	1.44285	1.75981	0.357932	-1.48224	down
GO:0004252	serine-type endopeptidase activity	molecular_function	8	5.09226e-06	ENSRNOG00000024181	Tpsab1	tryptase alpha/beta 1 [Source:RGD Symbol;Acc:3066]	13.4537	2.36544	0.88452	0.229493	0.065746	0.595011	18.7629	4.22981	up
GO:0004252	serine-type endopeptidase activity	molecular_function	8	5.09226e-06	ENSRNOG00000025184	Prss35	serine protease 35 [Source:RGD Symbol;Acc:1311282]	1.51959	0.857022	0.377862	0.174634	0.396188	0.403432	2.82726	1.49941	up
GO:0004252	serine-type endopeptidase activity	molecular_function	8	5.09226e-06	ENSRNOG00000026592	Rhbdl2	rhomboid like 2 [Source:RGD Symbol;Acc:1308295]	3.95946	2.14383	3.47796	0.21293	0.386777	0	15.9766	3.99788	up
GO:0004252	serine-type endopeptidase activity	molecular_function	8	5.09226e-06	ENSRNOG00000026650	Tmprss4	transmembrane serine protease 4 [Source:RGD Symbol;Acc:1305033]	9.25698	9.40508	10.9804	4.1428	2.28956	3.55417	2.96825	1.56961	up
GO:0004252	serine-type endopeptidase activity	molecular_function	8	5.09226e-06	ENSRNOG00000030530	Gzmm	granzyme M [Source:RGD Symbol;Acc:620022]	10.6821	11.5571	4.52111	40.2769	60.0277	34.2686	0.198853	-2.33022	down
GO:0004252	serine-type endopeptidase activity	molecular_function	8	5.09226e-06	ENSRNOG00000033266	Prss30	protease, serine, 30 [Source:RGD Symbol;Acc:735142]	1.48377	1.54044	0.866478	0.30746	0.532383	0.12398	4.03673	2.01319	up
GO:0004252	serine-type endopeptidase activity	molecular_function	8	5.09226e-06	ENSRNOG00000033564	Cfd	complement factor D [Source:RGD Symbol;Acc:2498]	19.8564	16.2343	14.3704	10.3933	4.70205	6.43942	2.34324	1.22851	up
GO:0004252	serine-type endopeptidase activity	molecular_function	8	5.09226e-06	ENSRNOG00000039698	Prss22	serine protease 22 [Source:RGD Symbol;Acc:1310880]	4.82992	3.06223	7.18291	0.48947	0.142106	0.14269	19.4701	4.28319	up
GO:0004252	serine-type endopeptidase activity	molecular_function	8	5.09226e-06	ENSRNOG00000045641	LOC691695	similar to granzyme C [Source:RGD Symbol;Acc:1597199]	0.139281	0	0	1.19259	0.166986	1.79939	0.0440908	-4.50338	down
GO:0004252	serine-type endopeptidase activity	molecular_function	8	5.09226e-06	ENSRNOG00000045973	Gzmb	granzyme B [Source:RGD Symbol;Acc:620018]	1.2569	2.48146	1.0418	7.67971	19.0044	10.3411	0.129105	-2.95338	down
GO:0004252	serine-type endopeptidase activity	molecular_function	8	5.09226e-06	ENSRNOG00000046301	Gzmbl3	Granzyme B-like 3 [Source:RGD Symbol;Acc:2320502]	1.27161	1.6678	0.565784	9.5866	12.0134	9.17037	0.113915	-3.13398	down
GO:0004252	serine-type endopeptidase activity	molecular_function	8	5.09226e-06	ENSRNOG00000049096	Mcpt8l2	mast cell protease 8-like 2 [Source:RGD Symbol;Acc:1302938]	19.7922	6.79392	4.06669	2.27301	0.99425	1.45419	6.49224	2.69872	up
GO:0004252	serine-type endopeptidase activity	molecular_function	8	5.09226e-06	ENSRNOG00000049976	Gzmbl2	Granzyme B-like 2 [Source:RGD Symbol;Acc:2320097]	2.02426	2.40992	1.11774	7.66841	9.94887	9.79654	0.202523	-2.30384	down
GO:0004252	serine-type endopeptidase activity	molecular_function	8	5.09226e-06	ENSRNOG00000049991	Mcpt8l3	mast cell protease 8-like 3 [Source:RGD Symbol;Acc:1302975]	6.48812	1.91135	1.06625	0.881239	0.828065	0.794557	3.78045	1.91856	up
GO:0004252	serine-type endopeptidase activity	molecular_function	8	5.09226e-06	ENSRNOG00000050198	Gzmbl1	Granszyme B-like 1 [Source:RGD Symbol;Acc:1561819]	0.200597	0.214042	0	1.6177	4.11414	2.13787	0.052688	-4.24638	down
GO:0004252	serine-type endopeptidase activity	molecular_function	8	5.09226e-06	ENSRNOG00000053400	Cfi	complement factor I [Source:RGD Symbol;Acc:620429]	20.1714	15.5898	19.2892	3.71338	3.97662	2.46643	5.42026	2.43836	up
GO:0004252	serine-type endopeptidase activity	molecular_function	8	5.09226e-06	ENSRNOG00000053494	Mcpt1l1	mast cell protease 1-like 1 [Source:RGD Symbol;Acc:2321286]	98.5586	20.0421	7.15613	1.23664	0.78863	1.70696	33.6949	5.07446	up
GO:0006508	proteolysis	biological_process	7	5.29108e-06	ENSRNOG00000001715	Ece2	endothelin-converting enzyme 2 [Source:RGD Symbol;Acc:1303039]	2.26656	1.70744	1.37349	0.772494	0.885253	0.850467	2.13199	1.0922	up
GO:0006508	proteolysis	biological_process	7	5.29108e-06	ENSRNOG00000002343	Uchl1	ubiquitin C-terminal hydrolase L1 [Source:RGD Symbol;Acc:3928]	5.50301	2.43439	3.73477	0.480678	0.909827	0.924316	5.04237	2.3341	up
GO:0006508	proteolysis	biological_process	7	5.29108e-06	ENSRNOG00000002937	Ren	renin [Source:RGD Symbol;Acc:3554]	0.210662	0.122506	0	0	0	0	1110.56	10.1171	up
GO:0006508	proteolysis	biological_process	7	5.29108e-06	ENSRNOG00000003538	Adamts4	ADAM metallopeptidase with thrombospondin type 1 motif, 4 [Source:RGD Symbol;Acc:621242]	1.18108	1.04194	1.92092	0.112503	0.050944	0.065765	18.0791	4.17625	up
GO:0006508	proteolysis	biological_process	7	5.29108e-06	ENSRNOG00000003950	Lvrn	laeverin [Source:RGD Symbol;Acc:1562779]	0.258387	0.196941	0.703072	0.055194	0.195712	0.072834	3.57818	1.83923	up
GO:0006508	proteolysis	biological_process	7	5.29108e-06	ENSRNOG00000004009	Xpnpep2	X-prolyl aminopeptidase 2 [Source:RGD Symbol;Acc:621277]	18.6505	24.1904	25.5114	40.7927	41.7445	62.8948	0.469994	-1.08928	down
GO:0006508	proteolysis	biological_process	7	5.29108e-06	ENSRNOG00000005278	Trhde	thyrotropin-releasing hormone degrading enzyme [Source:RGD Symbol;Acc:728895]	0.578595	0.577484	0.432529	0.69217	1.18802	1.33292	0.494414	-1.01621	down
GO:0006508	proteolysis	biological_process	7	5.29108e-06	ENSRNOG00000005515	Rhbdl3	rhomboid like 3 [Source:RGD Symbol;Acc:1311901]	9.37657	6.92596	20.658	4.73444	4.20402	4.75953	2.69825	1.43202	up
GO:0006508	proteolysis	biological_process	7	5.29108e-06	ENSRNOG00000005637	Usp44	ubiquitin specific peptidase 44 [Source:RGD Symbol;Acc:1308216]	0.122586	0.199211	0.082925	0.61892	0.833961	0.888159	0.172881	-2.53215	down
GO:0006508	proteolysis	biological_process	7	5.29108e-06	ENSRNOG00000006778	Mmp19	matrix metallopeptidase 19 [Source:RGD Symbol;Acc:1311376]	22.3382	18.0888	17.5573	9.9295	8.98639	7.69105	2.17929	1.12386	up
GO:0006508	proteolysis	biological_process	7	5.29108e-06	ENSRNOG00000006956	AABR07049085		1.41153	0.872019	2.08036	0.558763	0.504579	0.573109	2.66669	1.41505	up
GO:0006508	proteolysis	biological_process	7	5.29108e-06	ENSRNOG00000007467	Ace3	angiotensin I converting enzyme (peptidyl-dipeptidase A) 3 [Source:RGD Symbol;Acc:1561299]	0.356023	1.00323	0.275359	2.20798	2.82272	2.16244	0.227246	-2.13767	down
GO:0006508	proteolysis	biological_process	7	5.29108e-06	ENSRNOG00000008947	Cpz	carboxypeptidase Z [Source:RGD Symbol;Acc:620496]	16.8582	13.0576	17.2169	3.96244	4.46341	5.17347	3.46581	1.79319	up
GO:0006508	proteolysis	biological_process	7	5.29108e-06	ENSRNOG00000009172	Cpvl	carboxypeptidase, vitellogenic-like [Source:RGD Symbol;Acc:1563609]	0.170854	0.453222	0.155243	0.429546	0.839735	0.861303	0.365777	-1.45096	down
GO:0006508	proteolysis	biological_process	7	5.29108e-06	ENSRNOG00000009907	Mmp8	matrix metallopeptidase 8 [Source:RGD Symbol;Acc:631408]	2.00547	1.65031	0.763331	3.84607	1.99292	4.16718	0.44164	-1.17906	down
GO:0006508	proteolysis	biological_process	7	5.29108e-06	ENSRNOG00000010457	Vash1	vasohibin 1 [Source:RGD Symbol;Acc:1564082]	8.6217	7.37295	5.67165	3.02539	2.87105	2.83805	2.48055	1.31066	up
GO:0006508	proteolysis	biological_process	7	5.29108e-06	ENSRNOG00000010463	Cpa4	carboxypeptidase A4 [Source:RGD Symbol;Acc:1563619]	0.819451	0.547548	0.769869	0.213237	0.344024	0.043225	3.55856	1.8313	up
GO:0006508	proteolysis	biological_process	7	5.29108e-06	ENSRNOG00000010603	Gzma	granzyme A [Source:RGD Symbol;Acc:628640]	8.62104	9.97781	4.87209	37.3725	72.5884	41.9582	0.154496	-2.69436	down
GO:0006508	proteolysis	biological_process	7	5.29108e-06	ENSRNOG00000010661	Gzmk	granzyme K [Source:RGD Symbol;Acc:68401]	7.98123	11.2979	2.63631	40.0058	75.1209	36.9708	0.144088	-2.79498	down
GO:0006508	proteolysis	biological_process	7	5.29108e-06	ENSRNOG00000010935	Cpb2	carboxypeptidase B2 [Source:RGD Symbol;Acc:71035]	0.66711	0.499583	0.757648	0.244928	0.291876	0.095584	3.04298	1.60548	up
GO:0006508	proteolysis	biological_process	7	5.29108e-06	ENSRNOG00000010947	Mmp14	matrix metallopeptidase 14 [Source:RGD Symbol;Acc:620198]	73.5681	51.0079	51.6732	22.5951	16.4562	16.8319	3.15389	1.65713	up
GO:0006508	proteolysis	biological_process	7	5.29108e-06	ENSRNOG00000011181	Cpa3	carboxypeptidase A3 [Source:RGD Symbol;Acc:2390]	47.1511	14.3733	13.2997	1.9191	1.45637	1.13267	16.5976	4.0529	up
GO:0006508	proteolysis	biological_process	7	5.29108e-06	ENSRNOG00000011796	C1r	complement C1r [Source:RGD Symbol;Acc:1309091]	123.094	95.9083	133.697	50.3805	41.8088	43.88	2.59206	1.3741	up
GO:0006508	proteolysis	biological_process	7	5.29108e-06	ENSRNOG00000011971	C1s	complement C1s [Source:RGD Symbol;Acc:619983]	123.565	79.6933	122.779	33.0371	24.7081	21.0409	4.13826	2.04903	up
GO:0006508	proteolysis	biological_process	7	5.29108e-06	ENSRNOG00000012036	Pcsk5	proprotein convertase subtilisin/kexin type 5 [Source:RGD Symbol;Acc:620326]	9.04096	7.64478	5.71483	3.04202	2.71739	3.25211	2.48577	1.31369	up
GO:0006508	proteolysis	biological_process	7	5.29108e-06	ENSRNOG00000012640	Dpp7	dipeptidylpeptidase 7 [Source:RGD Symbol;Acc:71073]	64.5655	56.5833	53.7596	30.8807	27.5675	28.6084	2.00913	1.00657	up
GO:0006508	proteolysis	biological_process	7	5.29108e-06	ENSRNOG00000012835	Espl1	extra spindle pole bodies like 1, separase [Source:RGD Symbol;Acc:1306266]	1.25076	1.06367	1.61809	0.50097	0.851101	0.511543	2.11016	1.07735	up
GO:0006508	proteolysis	biological_process	7	5.29108e-06	ENSRNOG00000013290	Nrip3	nuclear receptor interacting protein 3 [Source:RGD Symbol;Acc:1304777]	1.22267	1.09093	1.5857	0.683302	0.338802	0.286766	2.97913	1.57489	up
GO:0006508	proteolysis	biological_process	7	5.29108e-06	ENSRNOG00000014064	Ctsh	cathepsin H [Source:RGD Symbol;Acc:2447]	939.712	762.607	773.915	433.187	408.244	355.294	2.06918	1.04906	up
GO:0006508	proteolysis	biological_process	7	5.29108e-06	ENSRNOG00000015902	Cpxm2	carboxypeptidase X (M14 family), member 2 [Source:RGD Symbol;Acc:1310955]	31.4857	28.534	40.452	9.18218	7.93435	5.96683	4.35256	2.12186	up
GO:0006508	proteolysis	biological_process	7	5.29108e-06	ENSRNOG00000016695	Mmp2	matrix metallopeptidase 2 [Source:RGD Symbol;Acc:621316]	112.629	84.3299	76.9475	30.7938	26.2646	32.2348	3.06749	1.61706	up
GO:0006508	proteolysis	biological_process	7	5.29108e-06	ENSRNOG00000017477	Mmp23	matrix metallopeptidase 23 [Source:RGD Symbol;Acc:620201]	9.53142	7.20412	8.46643	1.49011	1.53306	2.22156	4.8052	2.2646	up
GO:0006508	proteolysis	biological_process	7	5.29108e-06	ENSRNOG00000017539	Mmp9	matrix metallopeptidase 9 [Source:RGD Symbol;Acc:621320]	0.708985	0.326444	0.167858	0.688657	1.06294	1.59762	0.359274	-1.47684	down
GO:0006508	proteolysis	biological_process	7	5.29108e-06	ENSRNOG00000018059	Ihh	Indian hedgehog signaling molecule [Source:RGD Symbol;Acc:620021]	0.149505	0.246864	0.042178	0.508533	0.832047	0.848627	0.200322	-2.31961	down
GO:0006508	proteolysis	biological_process	7	5.29108e-06	ENSRNOG00000018384	Adam12	ADAM metallopeptidase domain 12 [Source:RGD Symbol;Acc:1583652]	2.89606	2.2266	2.01819	0.387369	0.422863	0.707964	4.70351	2.23374	up
GO:0006508	proteolysis	biological_process	7	5.29108e-06	ENSRNOG00000018611	Tpsb2	tryptase beta 2 [Source:RGD Symbol;Acc:3065]	34.027	7.33681	2.13233	0.969487	1.27184	2.36422	9.4443	3.23944	up
GO:0006508	proteolysis	biological_process	7	5.29108e-06	ENSRNOG00000018865	Adamts12	ADAM metallopeptidase with thrombospondin type 1 motif, 12 [Source:RGD Symbol;Acc:1307323]	4.73114	7.17003	4.91418	1.22778	1.39158	1.85944	3.75443	1.90859	up
GO:0006508	proteolysis	biological_process	7	5.29108e-06	ENSRNOG00000019447	Ecel1	endothelin converting enzyme-like 1 [Source:RGD Symbol;Acc:61806]	0.125468	0.19421	0.117384	0	0.032322	0	13.5221	3.75725	up
GO:0006508	proteolysis	biological_process	7	5.29108e-06	ENSRNOG00000020533	Htra1	HtrA serine peptidase 1 [Source:RGD Symbol;Acc:69235]	85.3305	79.1533	114.318	41.5745	38.9896	41.6878	2.28055	1.18938	up
GO:0006508	proteolysis	biological_process	7	5.29108e-06	ENSRNOG00000020563	Cma1	chymase 1 [Source:RGD Symbol;Acc:2365]	39.918	10.9509	5.28186	1.65773	1.49175	1.16244	13.0222	3.7029	up
GO:0006508	proteolysis	biological_process	7	5.29108e-06	ENSRNOG00000020625	Mcpt1	mast cell protease 2 [Source:RGD Symbol;Acc:621058]	12.8352	6.74173	9.87014	0.932975	0.814616	0.769753	11.6977	3.54815	up
GO:0006508	proteolysis	biological_process	7	5.29108e-06	ENSRNOG00000021155	Ctsk	cathepsin K [Source:RGD Symbol;Acc:61810]	41.0334	42.676	29.5982	11.0648	7.58504	6.87196	4.43964	2.15044	up
GO:0006508	proteolysis	biological_process	7	5.29108e-06	ENSRNOG00000021220	Cpxm1	carboxypeptidase X (M14 family), member 1 [Source:RGD Symbol;Acc:1306937]	10.3279	8.38416	10.0657	4.27552	3.66281	1.69006	2.98884	1.57959	up
GO:0006508	proteolysis	biological_process	7	5.29108e-06	ENSRNOG00000021619	Cela3b	chymotrypsin like elastase 3B [Source:RGD Symbol;Acc:1307819]	4.59201	1.0716	1.36544	0.246158	0.14853	0	17.8091	4.15455	up
GO:0006508	proteolysis	biological_process	7	5.29108e-06	ENSRNOG00000023643	Mmp17	matrix metallopeptidase 17 [Source:RGD Symbol;Acc:1311541]	4.44504	5.58279	4.56778	1.30238	1.1677	2.24148	3.09783	1.63126	up
GO:0006508	proteolysis	biological_process	7	5.29108e-06	ENSRNOG00000023858	Prss39	protease, serine, 39 [Source:RGD Symbol;Acc:1309276]	0.61737	0.670793	0.291965	1.21195	1.44285	1.75981	0.357932	-1.48224	down
GO:0006508	proteolysis	biological_process	7	5.29108e-06	ENSRNOG00000024181	Tpsab1	tryptase alpha/beta 1 [Source:RGD Symbol;Acc:3066]	13.4537	2.36544	0.88452	0.229493	0.065746	0.595011	18.7629	4.22981	up
GO:0006508	proteolysis	biological_process	7	5.29108e-06	ENSRNOG00000025001	Pcolce	procollagen C-endopeptidase enhancer [Source:RGD Symbol;Acc:3270]	91.1937	57.8994	71.8722	22.2554	16.594	23.1289	3.5652	1.83398	up
GO:0006508	proteolysis	biological_process	7	5.29108e-06	ENSRNOG00000025184	Prss35	serine protease 35 [Source:RGD Symbol;Acc:1311282]	1.51959	0.857022	0.377862	0.174634	0.396188	0.403432	2.82726	1.49941	up
GO:0006508	proteolysis	biological_process	7	5.29108e-06	ENSRNOG00000026592	Rhbdl2	rhomboid like 2 [Source:RGD Symbol;Acc:1308295]	3.95946	2.14383	3.47796	0.21293	0.386777	0	15.9766	3.99788	up
GO:0006508	proteolysis	biological_process	7	5.29108e-06	ENSRNOG00000026650	Tmprss4	transmembrane serine protease 4 [Source:RGD Symbol;Acc:1305033]	9.25698	9.40508	10.9804	4.1428	2.28956	3.55417	2.96825	1.56961	up
GO:0006508	proteolysis	biological_process	7	5.29108e-06	ENSRNOG00000027096	Ctsw	cathepsin W [Source:RGD Symbol;Acc:1309354]	2.08638	3.55784	0.820635	5.92082	7.85561	4.04858	0.362685	-1.46321	down
GO:0006508	proteolysis	biological_process	7	5.29108e-06	ENSRNOG00000030187	Mmp12	matrix metallopeptidase 12 [Source:RGD Symbol;Acc:620195]	23.6153	23.6938	16.196	2.3016	0.393955	0.799687	18.169	4.18341	up
GO:0006508	proteolysis	biological_process	7	5.29108e-06	ENSRNOG00000030530	Gzmm	granzyme M [Source:RGD Symbol;Acc:620022]	10.6821	11.5571	4.52111	40.2769	60.0277	34.2686	0.198853	-2.33022	down
GO:0006508	proteolysis	biological_process	7	5.29108e-06	ENSRNOG00000033266	Prss30	protease, serine, 30 [Source:RGD Symbol;Acc:735142]	1.48377	1.54044	0.866478	0.30746	0.532383	0.12398	4.03673	2.01319	up
GO:0006508	proteolysis	biological_process	7	5.29108e-06	ENSRNOG00000033527	Pappa1	pappalysin 1 [Source:RGD Symbol;Acc:1307742]	0.720924	0.38901	0.661715	0.190626	0.0554609	0.132972	4.67381	2.2246	up
GO:0006508	proteolysis	biological_process	7	5.29108e-06	ENSRNOG00000033564	Cfd	complement factor D [Source:RGD Symbol;Acc:2498]	19.8564	16.2343	14.3704	10.3933	4.70205	6.43942	2.34324	1.22851	up
GO:0006508	proteolysis	biological_process	7	5.29108e-06	ENSRNOG00000037801	LOC100360238	rCG21419-like [Source:NCBI gene;Acc:100360238]	0.64068	0.715105	0.571117	2.16285	2.63506	2.7119	0.256585	-1.96249	down
GO:0006508	proteolysis	biological_process	7	5.29108e-06	ENSRNOG00000039698	Prss22	serine protease 22 [Source:RGD Symbol;Acc:1310880]	4.82992	3.06223	7.18291	0.48947	0.142106	0.14269	19.4701	4.28319	up
GO:0006508	proteolysis	biological_process	7	5.29108e-06	ENSRNOG00000045641	LOC691695	similar to granzyme C [Source:RGD Symbol;Acc:1597199]	0.139281	0	0	1.19259	0.166986	1.79939	0.0440908	-4.50338	down
GO:0006508	proteolysis	biological_process	7	5.29108e-06	ENSRNOG00000045973	Gzmb	granzyme B [Source:RGD Symbol;Acc:620018]	1.2569	2.48146	1.0418	7.67971	19.0044	10.3411	0.129105	-2.95338	down
GO:0006508	proteolysis	biological_process	7	5.29108e-06	ENSRNOG00000046301	Gzmbl3	Granzyme B-like 3 [Source:RGD Symbol;Acc:2320502]	1.27161	1.6678	0.565784	9.5866	12.0134	9.17037	0.113915	-3.13398	down
GO:0006508	proteolysis	biological_process	7	5.29108e-06	ENSRNOG00000046601	Unc5cl	unc-5 family C-terminal like [Source:RGD Symbol;Acc:1587368]	1.24961	0.804409	0.119574	0.266412	0.207913	0.208789	3.18189	1.66988	up
GO:0006508	proteolysis	biological_process	7	5.29108e-06	ENSRNOG00000047697	Ggt1	gamma-glutamyltransferase 1 [Source:RGD Symbol;Acc:2683]	5.05386	8.31999	4.00574	2.28075	3.11226	3.13478	2.03799	1.02715	up
GO:0006508	proteolysis	biological_process	7	5.29108e-06	ENSRNOG00000049096	Mcpt8l2	mast cell protease 8-like 2 [Source:RGD Symbol;Acc:1302938]	19.7922	6.79392	4.06669	2.27301	0.99425	1.45419	6.49224	2.69872	up
GO:0006508	proteolysis	biological_process	7	5.29108e-06	ENSRNOG00000049976	Gzmbl2	Granzyme B-like 2 [Source:RGD Symbol;Acc:2320097]	2.02426	2.40992	1.11774	7.66841	9.94887	9.79654	0.202523	-2.30384	down
GO:0006508	proteolysis	biological_process	7	5.29108e-06	ENSRNOG00000049991	Mcpt8l3	mast cell protease 8-like 3 [Source:RGD Symbol;Acc:1302975]	6.48812	1.91135	1.06625	0.881239	0.828065	0.794557	3.78045	1.91856	up
GO:0006508	proteolysis	biological_process	7	5.29108e-06	ENSRNOG00000050198	Gzmbl1	Granszyme B-like 1 [Source:RGD Symbol;Acc:1561819]	0.200597	0.214042	0	1.6177	4.11414	2.13787	0.052688	-4.24638	down
GO:0006508	proteolysis	biological_process	7	5.29108e-06	ENSRNOG00000051854	Enpep	glutamyl aminopeptidase [Source:RGD Symbol;Acc:621228]	8.50375	10.2131	12.2843	40.6763	34.8158	32.8775	0.286069	-1.80556	down
GO:0006508	proteolysis	biological_process	7	5.29108e-06	ENSRNOG00000053400	Cfi	complement factor I [Source:RGD Symbol;Acc:620429]	20.1714	15.5898	19.2892	3.71338	3.97662	2.46643	5.42026	2.43836	up
GO:0006508	proteolysis	biological_process	7	5.29108e-06	ENSRNOG00000053494	Mcpt1l1	mast cell protease 1-like 1 [Source:RGD Symbol;Acc:2321286]	98.5586	20.0421	7.15613	1.23664	0.78863	1.70696	33.6949	5.07446	up
GO:0006508	proteolysis	biological_process	7	5.29108e-06	ENSRNOG00000061484	Adamts2	ADAM metallopeptidase with thrombospondin type 1 motif, 2 [Source:RGD Symbol;Acc:1565950]	29.7744	26.0212	21.5239	7.85753	7.14294	6.23486	3.64108	1.86437	up
GO:0006508	proteolysis	biological_process	7	5.29108e-06	ENSRNOG00000062101	Ace	angiotensin I converting enzyme [Source:RGD Symbol;Acc:2493]	116.54	162.976	113.041	251.855	283.285	379.239	0.429316	-1.21989	down
GO:0016021	integral component of membrane	cellular_component	5	5.31034e-06	ENSRNOG00000000017	Steap1	STEAP family member 1 [Source:RGD Symbol;Acc:1311543]	1.40189	0.743856	3.78576	0.298139	0.147005	0.119957	10.4964	3.39182	up
GO:0016021	integral component of membrane	cellular_component	5	5.31034e-06	ENSRNOG00000000187	Csf2rb	colony stimulating factor 2 receptor beta common subunit [Source:RGD Symbol;Acc:620189]	18.4435	13.9751	14.6689	8.13905	5.53808	7.54263	2.21904	1.14993	up
GO:0016021	integral component of membrane	cellular_component	5	5.31034e-06	ENSRNOG00000000251	St6galnac1	ST6 N-acetylgalactosaminide alpha-2,6-sialyltransferase 1 [Source:RGD Symbol;Acc:1562048]	0.404718	0.01927	0.588358	0	0	0	3374.49	11.7205	up
GO:0016021	integral component of membrane	cellular_component	5	5.31034e-06	ENSRNOG00000000413	Pln	phospholamban [Source:RGD Symbol;Acc:619894]	2.50693	3.8037	2.06136	1.0686	1.05846	0.925892	2.74226	1.45537	up
GO:0016021	integral component of membrane	cellular_component	5	5.31034e-06	ENSRNOG00000000562	Prf1	perforin 1 [Source:RGD Symbol;Acc:708463]	8.20777	9.31399	3.00773	32.4085	55.6601	39.4225	0.161027	-2.63463	down
GO:0016021	integral component of membrane	cellular_component	5	5.31034e-06	ENSRNOG00000000700	Tmem119	transmembrane protein 119 [Source:RGD Symbol;Acc:1307573]	24.2595	22.6654	14.1477	6.59079	6.90106	6.28528	3.08804	1.62669	up
GO:0016021	integral component of membrane	cellular_component	5	5.31034e-06	ENSRNOG00000000805	Gja1	gap junction protein, alpha 1 [Source:RGD Symbol;Acc:2690]	46.1553	43.4378	61.0475	18.0629	16.8096	17.0274	2.90252	1.5373	up
GO:0016021	integral component of membrane	cellular_component	5	5.31034e-06	ENSRNOG00000000963	Tmem132c	transmembrane protein 132C [Source:RGD Symbol;Acc:1583824]	8.55501	8.39771	7.03918	3.2779	3.19082	3.70491	2.35824	1.23771	up
GO:0016021	integral component of membrane	cellular_component	5	5.31034e-06	ENSRNOG00000001092	Kl	Klotho [Source:RGD Symbol;Acc:620396]	2.60662	5.62618	3.57293	8.08057	8.68837	10.3107	0.435964	-1.19772	down
GO:0016021	integral component of membrane	cellular_component	5	5.31034e-06	ENSRNOG00000001216	Trpm2	transient receptor potential cation channel, subfamily M, member 2 [Source:RGD Symbol;Acc:1311889]	2.73189	2.39503	2.50324	6.81675	11.5299	8.15396	0.287924	-1.79624	down
GO:0016021	integral component of membrane	cellular_component	5	5.31034e-06	ENSRNOG00000001376	Mettl7a	methyltransferase like 7A [Source:RGD Symbol;Acc:1308407]	144.546	161.177	106.978	323.651	289.761	335.919	0.434728	-1.20181	down
GO:0016021	integral component of membrane	cellular_component	5	5.31034e-06	ENSRNOG00000001476	Cldn4	claudin 4 [Source:RGD Symbol;Acc:1307932]	13.9115	12.0102	14.9617	3.95699	3.62557	4.40384	3.41082	1.77012	up
GO:0016021	integral component of membrane	cellular_component	5	5.31034e-06	ENSRNOG00000001492	Slc8a2	solute carrier family 8 member A2 [Source:RGD Symbol;Acc:620194]	0.233813	0.256782	0.262259	0.0343693	0.0610045	0.134155	3.28	1.7137	up
GO:0016021	integral component of membrane	cellular_component	5	5.31034e-06	ENSRNOG00000001656	Kcnj15	potassium voltage-gated channel subfamily J member 15 [Source:RGD Symbol;Acc:621662]	4.6812	4.55168	4.3769	7.20508	12.7969	8.92056	0.470559	-1.08755	down
GO:0016021	integral component of membrane	cellular_component	5	5.31034e-06	ENSRNOG00000001715	Ece2	endothelin-converting enzyme 2 [Source:RGD Symbol;Acc:1303039]	2.26656	1.70744	1.37349	0.772494	0.885253	0.850467	2.13199	1.0922	up
GO:0016021	integral component of membrane	cellular_component	5	5.31034e-06	ENSRNOG00000001757	Tm4sf19	transmembrane 4 L six family member 19 [Source:RGD Symbol;Acc:1560486]	6.8937	2.69898	3.94108	2.01858	2.04802	1.63897	2.37202	1.24612	up
GO:0016021	integral component of membrane	cellular_component	5	5.31034e-06	ENSRNOG00000001864	Tmem191c	transmembrane protein 191C [Source:RGD Symbol;Acc:1587016]	0.566277	0.616627	0.459442	1.274	1.05426	1.29894	0.452786	-1.1431	down
GO:0016021	integral component of membrane	cellular_component	5	5.31034e-06	ENSRNOG00000001912	Tecrl	trans-2,3-enoyl-CoA reductase-like [Source:RGD Symbol;Acc:1304608]	0.069141	0.154157	0.036659	0.363116	0.331271	0.234221	0.279943	-1.8368	down
GO:0016021	integral component of membrane	cellular_component	5	5.31034e-06	ENSRNOG00000001926	Cldn1	claudin 1 [Source:RGD Symbol;Acc:68422]	0.854451	0.532531	0.439747	1.26286	1.16606	2.36597	0.380974	-1.39223	down
GO:0016021	integral component of membrane	cellular_component	5	5.31034e-06	ENSRNOG00000002093	Tgfbr3	transforming growth factor beta receptor 3 [Source:RGD Symbol;Acc:61821]	13.1989	16.2618	13.9274	33.5314	35.2539	39.6688	0.400058	-1.32172	down
GO:0016021	integral component of membrane	cellular_component	5	5.31034e-06	ENSRNOG00000002244	Pdgfra	platelet derived growth factor receptor alpha [Source:RGD Symbol;Acc:3284]	10.7913	10.4928	10.1398	22.5292	21.8926	24.1598	0.458196	-1.12596	down
GO:0016021	integral component of membrane	cellular_component	5	5.31034e-06	ENSRNOG00000002305	Slc15a2	solute carrier family 15 member 2 [Source:RGD Symbol;Acc:61972]	2.13245	2.15608	1.18697	12.061	16.6195	13.8804	0.128651	-2.95847	down
GO:0016021	integral component of membrane	cellular_component	5	5.31034e-06	ENSRNOG00000002331	Aldh3a1	aldehyde dehydrogenase 3 family, member A1 [Source:RGD Symbol;Acc:2088]	0.906245	1.33741	0.734843	3.9607	3.15494	3.58458	0.278359	-1.84498	down
GO:0016021	integral component of membrane	cellular_component	5	5.31034e-06	ENSRNOG00000002451	Fndc3c1	fibronectin type III domain containing 3C1 [Source:RGD Symbol;Acc:1563846]	0.0535321	0	0.0492507	0	0	0	342.609	8.42042	up
GO:0016021	integral component of membrane	cellular_component	5	5.31034e-06	ENSRNOG00000002723	Sele	selectin E [Source:RGD Symbol;Acc:3654]	2.98187	1.19921	3.6168	0.289072	0.400788	0.3301	7.64528	2.93457	up
GO:0016021	integral component of membrane	cellular_component	5	5.31034e-06	ENSRNOG00000002754	Areg	amphiregulin [Source:RGD Symbol;Acc:2149]	15.0098	32.3225	41.5271	12.678	12.7718	5.23223	2.89613	1.53413	up
GO:0016021	integral component of membrane	cellular_component	5	5.31034e-06	ENSRNOG00000002771	Ereg	epiregulin [Source:RGD Symbol;Acc:620299]	3.53527	6.81166	10.5663	3.01735	3.00566	2.96011	2.32806	1.21913	up
GO:0016021	integral component of membrane	cellular_component	5	5.31034e-06	ENSRNOG00000002776	Sell	selectin L [Source:RGD Symbol;Acc:3655]	4.08356	3.42413	3.10125	10.9568	7.5716	15.9543	0.30766	-1.70059	down
GO:0016021	integral component of membrane	cellular_component	5	5.31034e-06	ENSRNOG00000002794	Selp	selectin P [Source:RGD Symbol;Acc:3656]	3.596	2.43421	6.01392	1.27506	1.4035	1.324	3.0091	1.58933	up
GO:0016021	integral component of membrane	cellular_component	5	5.31034e-06	ENSRNOG00000002978	Faslg	Fas ligand [Source:RGD Symbol;Acc:3880]	0.816894	1.01133	0.807977	3.43662	5.79528	3.71874	0.203558	-2.29649	down
GO:0016021	integral component of membrane	cellular_component	5	5.31034e-06	ENSRNOG00000003245	Cacng1	calcium voltage-gated channel auxiliary subunit gamma 1 [Source:RGD Symbol;Acc:2249]	0.342541	0.070667	0.216756	0.041472	0	0	15.1901	3.92506	up
GO:0016021	integral component of membrane	cellular_component	5	5.31034e-06	ENSRNOG00000003298	Cd247	Cd247 molecule [Source:RGD Symbol;Acc:2305]	3.27195	2.92367	1.71789	6.18881	10.0058	6.84293	0.343505	-1.5416	down
GO:0016021	integral component of membrane	cellular_component	5	5.31034e-06	ENSRNOG00000003442	Adora1	adenosine A1 receptor [Source:RGD Symbol;Acc:2048]	2.22958	2.85704	1.93044	0.530347	0.128806	0.423696	6.48019	2.69604	up
GO:0016021	integral component of membrane	cellular_component	5	5.31034e-06	ENSRNOG00000003510	Fmo2	flavin containing dimethylaniline monoxygenase 2 [Source:RGD Symbol;Acc:628600]	36.2628	40.8993	13.9322	192.698	233.398	232.817	0.138249	-2.85466	down
GO:0016021	integral component of membrane	cellular_component	5	5.31034e-06	ENSRNOG00000003546	Tnfrsf12a	TNF receptor superfamily member 12A [Source:RGD Symbol;Acc:631329]	41.3385	35.8452	71.9517	14.1135	11.348	9.02931	4.32393	2.11234	up
GO:0016021	integral component of membrane	cellular_component	5	5.31034e-06	ENSRNOG00000003648	Cldn6	claudin 6 [Source:RGD Symbol;Acc:1308837]	5.55802	3.20902	3.03748	0.538814	0.51741	0.201333	9.38687	3.23064	up
GO:0016021	integral component of membrane	cellular_component	5	5.31034e-06	ENSRNOG00000003732	Flrt2	fibronectin leucine rich transmembrane protein 2 [Source:RGD Symbol;Acc:1308574]	5.80223	4.99289	14.0709	1.80281	2.04289	1.39731	4.74271	2.24571	up
GO:0016021	integral component of membrane	cellular_component	5	5.31034e-06	ENSRNOG00000003778	Opn3	opsin 3 [Source:RGD Symbol;Acc:1594385]	1.17077	1.46204	1.21148	0.498874	0.618789	0.569659	2.27834	1.18798	up
GO:0016021	integral component of membrane	cellular_component	5	5.31034e-06	ENSRNOG00000003929	Pcdh19	protocadherin 19 [Source:RGD Symbol;Acc:1565392]	1.1074	1.82213	1.00018	2.27102	3.07318	4.05547	0.418069	-1.25819	down
GO:0016021	integral component of membrane	cellular_component	5	5.31034e-06	ENSRNOG00000003998	Sgca	sarcoglycan, alpha [Source:RGD Symbol;Acc:1308062]	2.86595	3.15146	2.51249	0.916284	2.09906	1.11714	2.06411	1.04552	up
GO:0016021	integral component of membrane	cellular_component	5	5.31034e-06	ENSRNOG00000004101	Marc1	mitochondrial amidoxime reducing component 1 [Source:RGD Symbol;Acc:1592219]	0.710802	0.652633	0.387323	1.67322	1.55838	2.48694	0.306155	-1.70767	down
GO:0016021	integral component of membrane	cellular_component	5	5.31034e-06	ENSRNOG00000004400	Avpr1a	arginine vasopressin receptor 1A [Source:RGD Symbol;Acc:2185]	0.884247	0.991065	0.583946	2.30329	2.28827	2.50882	0.346356	-1.52967	down
GO:0016021	integral component of membrane	cellular_component	5	5.31034e-06	ENSRNOG00000004488	Bdkrb1	bradykinin receptor B1 [Source:RGD Symbol;Acc:620401]	0.213898	0.179507	1.7444	0	0.153112	0.038042	11.1837	3.48332	up
GO:0016021	integral component of membrane	cellular_component	5	5.31034e-06	ENSRNOG00000004560	Cacna1b	calcium voltage-gated channel subunit alpha1 B [Source:RGD Symbol;Acc:628852]	0.178632	0.207804	0.083371	0.0219777	0.0460863	0.0587362	3.7051	1.88951	up
GO:0016021	integral component of membrane	cellular_component	5	5.31034e-06	ENSRNOG00000004589	Galnt16	polypeptide N-acetylgalactosaminyltransferase 16 [Source:RGD Symbol;Acc:1310202]	1.39865	0.833933	0.976815	0.729452	0.391388	0.453318	2.0388	1.02772	up
GO:0016021	integral component of membrane	cellular_component	5	5.31034e-06	ENSRNOG00000004641	Sstr4	somatostatin receptor 4 [Source:RGD Symbol;Acc:3764]	4.35857	4.697	2.99517	7.81727	5.98183	11.5699	0.475019	-1.07394	down
GO:0016021	integral component of membrane	cellular_component	5	5.31034e-06	ENSRNOG00000004698	Cd244	CD244 molecule [Source:RGD Symbol;Acc:68400]	3.35409	2.49545	2.79384	4.69091	9.29917	5.70438	0.438874	-1.18812	down
GO:0016021	integral component of membrane	cellular_component	5	5.31034e-06	ENSRNOG00000004757	Tmem158	transmembrane protein 158 [Source:RGD Symbol;Acc:708473]	6.04417	5.08716	5.48246	1.09578	1.93367	1.74885	3.47692	1.79781	up
GO:0016021	integral component of membrane	cellular_component	5	5.31034e-06	ENSRNOG00000004828	Acvr1c	activin A receptor type 1C [Source:RGD Symbol;Acc:621789]	0.12058	0.010915	0.092872	0.332658	0.442515	0.377397	0.194667	-2.36092	down
GO:0016021	integral component of membrane	cellular_component	5	5.31034e-06	ENSRNOG00000004854	Has2	hyaluronan synthase 2 [Source:RGD Symbol;Acc:2781]	0.632455	0.404069	0.485014	0.097024	0.031942	0.012871	10.7274	3.42322	up
GO:0016021	integral component of membrane	cellular_component	5	5.31034e-06	ENSRNOG00000004932	Sel1l3	SEL1L family member 3 [Source:RGD Symbol;Acc:1562860]	8.09729	7.68895	7.82322	2.49861	2.29416	1.6158	3.68405	1.88129	up
GO:0016021	integral component of membrane	cellular_component	5	5.31034e-06	ENSRNOG00000005007	Scn3a	sodium voltage-gated channel alpha subunit 3 [Source:RGD Symbol;Acc:3635]	0.349693	0.376685	0.255447	0.0940699	0.0904227	0.113441	3.29544	1.72047	up
GO:0016021	integral component of membrane	cellular_component	5	5.31034e-06	ENSRNOG00000005109	Rprm	reprimo, TP53 dependent G2 arrest mediator homolog [Source:RGD Symbol;Acc:1595512]	1.59934	1.59701	0.788309	0.13436	0.462554	0.42225	3.90974	1.96707	up
GO:0016021	integral component of membrane	cellular_component	5	5.31034e-06	ENSRNOG00000005277	Ptprv	protein tyrosine phosphatase, receptor type, V [Source:RGD Symbol;Acc:621123]	2.06795	0.523836	0.411281	0.042503	0.101355	0.0989	12.3706	3.62884	up
GO:0016021	integral component of membrane	cellular_component	5	5.31034e-06	ENSRNOG00000005278	Trhde	thyrotropin-releasing hormone degrading enzyme [Source:RGD Symbol;Acc:728895]	0.578595	0.577484	0.432529	0.69217	1.18802	1.33292	0.494414	-1.01621	down
GO:0016021	integral component of membrane	cellular_component	5	5.31034e-06	ENSRNOG00000005370	S1pr4	sphingosine-1-phosphate receptor 4 [Source:RGD Symbol;Acc:1304801]	4.28814	4.99459	2.38803	7.72174	10.0489	8.44379	0.445203	-1.16746	down
GO:0016021	integral component of membrane	cellular_component	5	5.31034e-06	ENSRNOG00000005515	Rhbdl3	rhomboid like 3 [Source:RGD Symbol;Acc:1311901]	9.37657	6.92596	20.658	4.73444	4.20402	4.75953	2.69825	1.43202	up
GO:0016021	integral component of membrane	cellular_component	5	5.31034e-06	ENSRNOG00000005519	Grm3	glutamate metabotropic receptor 3 [Source:RGD Symbol;Acc:2744]	1.19676	1.61378	0.921182	0.377273	0.291303	0.740839	2.64771	1.40475	up
GO:0016021	integral component of membrane	cellular_component	5	5.31034e-06	ENSRNOG00000005723	Grin3a	glutamate ionotropic receptor NMDA type subunit 3A [Source:RGD Symbol;Acc:621704]	0.246836	0.126828	0.17107	0	0	0	1815.78	10.8264	up
GO:0016021	integral component of membrane	cellular_component	5	5.31034e-06	ENSRNOG00000005853	Tacr1	tachykinin receptor 1 [Source:RGD Symbol;Acc:3811]	0.962161	0.32157	1.14445	0	0.068343	0	35.5293	5.15094	up
GO:0016021	integral component of membrane	cellular_component	5	5.31034e-06	ENSRNOG00000005954	Il5ra	interleukin 5 receptor subunit alpha [Source:RGD Symbol;Acc:70938]	0.037047	0.036962	0.021553	0.143935	0.05033	0.188178	0.249873	-2.00074	down
GO:0016021	integral component of membrane	cellular_component	5	5.31034e-06	ENSRNOG00000005971	Gpr176	G protein-coupled receptor 176 [Source:RGD Symbol;Acc:621718]	3.82881	2.33799	3.09344	0.825053	0.961897	0.707013	3.71307	1.89261	up
GO:0016021	integral component of membrane	cellular_component	5	5.31034e-06	ENSRNOG00000006255	Nipal4	NIPA-like domain containing 4 [Source:RGD Symbol;Acc:1309452]	1.49942	1.05398	1.36212	0.692961	0.292843	0.520864	2.59879	1.37784	up
GO:0016021	integral component of membrane	cellular_component	5	5.31034e-06	ENSRNOG00000006311	Ccr9	C-C motif chemokine receptor 9 [Source:RGD Symbol;Acc:628750]	0.257415	0.243861	0.157072	0.830937	1.15195	0.453854	0.270175	-1.88803	down
GO:0016021	integral component of membrane	cellular_component	5	5.31034e-06	ENSRNOG00000006320	Ptges	prostaglandin E synthase [Source:RGD Symbol;Acc:62076]	2.66374	0.913633	1.41129	0.185829	0	0.04284	21.8161	4.44732	up
GO:0016021	integral component of membrane	cellular_component	5	5.31034e-06	ENSRNOG00000006368	Lrrn3	leucine rich repeat neuronal 3 [Source:RGD Symbol;Acc:71066]	3.33196	2.98798	1.80872	4.74654	4.94897	6.68291	0.496303	-1.01071	down
GO:0016021	integral component of membrane	cellular_component	5	5.31034e-06	ENSRNOG00000006569	Itgb8	integrin subunit beta 8 [Source:RGD Symbol;Acc:1311374]	2.69064	1.81036	3.42008	1.06221	1.22856	0.71459	2.63565	1.39816	up
GO:0016021	integral component of membrane	cellular_component	5	5.31034e-06	ENSRNOG00000006620	Xcr1	X-C motif chemokine receptor 1 [Source:RGD Symbol;Acc:1311480]	1.18516	1.08826	0.853155	0.531912	0.487721	0.484413	2.07878	1.05573	up
GO:0016021	integral component of membrane	cellular_component	5	5.31034e-06	ENSRNOG00000006645	Ryr3	ryanodine receptor 3 [Source:RGD Symbol;Acc:68952]	0.552848	0.70992	0.557857	1.46945	1.2114	2.06304	0.383784	-1.38163	down
GO:0016021	integral component of membrane	cellular_component	5	5.31034e-06	ENSRNOG00000006653	Slc38a4	solute carrier family 38, member 4 [Source:RGD Symbol;Acc:621836]	0.908531	1.00255	0.772373	0.309496	0.390713	0.275171	2.75119	1.46006	up
GO:0016021	integral component of membrane	cellular_component	5	5.31034e-06	ENSRNOG00000006723	Itga11	integrin subunit alpha 11 [Source:RGD Symbol;Acc:1311711]	2.02577	0.948998	1.43154	0.445333	0.566447	0.898136	2.30707	1.20606	up
GO:0016021	integral component of membrane	cellular_component	5	5.31034e-06	ENSRNOG00000006736	Ccr3	C-C motif chemokine receptor 3 [Source:RGD Symbol;Acc:620593]	0.551225	0.302268	0.337885	1.23779	0.699775	0.888156	0.421619	-1.24599	down
GO:0016021	integral component of membrane	cellular_component	5	5.31034e-06	ENSRNOG00000006782	RGD1560028	similar to RIKEN cDNA C130060K24 gene [Source:RGD Symbol;Acc:1560028]	0	0	0	0.297038	0.208887	0.183023	0.000435447	-11.1652	down
GO:0016021	integral component of membrane	cellular_component	5	5.31034e-06	ENSRNOG00000006787	Dhcr24	24-dehydrocholesterol reductase [Source:RGD Symbol;Acc:1306529]	21.4228	23.7147	25.3242	11.6489	11.5486	11.3949	2.03691	1.02638	up
GO:0016021	integral component of membrane	cellular_component	5	5.31034e-06	ENSRNOG00000006814	Klrg2	killer cell lectin like receptor G2 [Source:RGD Symbol;Acc:1587495]	1.22444	1.79225	0.647392	2.22165	3.05842	2.33879	0.480923	-1.05612	down
GO:0016021	integral component of membrane	cellular_component	5	5.31034e-06	ENSRNOG00000006841	Ano4	anoctamin 4 [Source:RGD Symbol;Acc:1310252]	0.373775	0.351622	0.29264	0.161079	0.163812	0.171104	2.05251	1.03739	up
GO:0016021	integral component of membrane	cellular_component	5	5.31034e-06	ENSRNOG00000006878	Slc26a3	solute carrier family 26 member 3 [Source:RGD Symbol;Acc:620623]	0.782861	1.16543	0.388403	3.8752	2.68098	1.62944	0.285463	-1.80862	down
GO:0016021	integral component of membrane	cellular_component	5	5.31034e-06	ENSRNOG00000007178	Cd8a	CD8a molecule [Source:RGD Symbol;Acc:2316]	6.78804	8.40062	2.99683	17.1877	29.9419	15.0684	0.292381	-1.77408	down
GO:0016021	integral component of membrane	cellular_component	5	5.31034e-06	ENSRNOG00000007234	Cyp51	cytochrome P450, family 51 [Source:RGD Symbol;Acc:2481]	39.6852	44.4193	53.1185	16.3385	15.6261	14.35	2.96284	1.56698	up
GO:0016021	integral component of membrane	cellular_component	5	5.31034e-06	ENSRNOG00000007290	Atp1a2	ATPase Na+/K+ transporting subunit alpha 2 [Source:RGD Symbol;Acc:2168]	1.11361	2.2107	0.439613	6.71531	7.20043	7.69308	0.174185	-2.52131	down
GO:0016021	integral component of membrane	cellular_component	5	5.31034e-06	ENSRNOG00000007310	Klrb1b	killer cell lectin-like receptor subfamily B, member 1A [Source:RGD Symbol;Acc:1586149]	2.14455	2.25501	1.53234	5.65662	8.09993	5.18838	0.313113	-1.67524	down
GO:0016021	integral component of membrane	cellular_component	5	5.31034e-06	ENSRNOG00000007455	Tmem132e	transmembrane protein 132E [Source:RGD Symbol;Acc:1565522]	0.39037	0.29969	0.554796	0.132711	0.0810449	0.161844	3.31431	1.72871	up
GO:0016021	integral component of membrane	cellular_component	5	5.31034e-06	ENSRNOG00000007467	Ace3	angiotensin I converting enzyme (peptidyl-dipeptidase A) 3 [Source:RGD Symbol;Acc:1561299]	0.356023	1.00323	0.275359	2.20798	2.82272	2.16244	0.227246	-2.13767	down
GO:0016021	integral component of membrane	cellular_component	5	5.31034e-06	ENSRNOG00000007637	Acer2	alkaline ceramidase 2 [Source:RGD Symbol;Acc:1304629]	45.3088	74.0441	75.5933	129.285	143.009	166.017	0.444766	-1.16888	down
GO:0016021	integral component of membrane	cellular_component	5	5.31034e-06	ENSRNOG00000007664	Tnfrsf13c	TNF receptor superfamily member 13C [Source:RGD Symbol;Acc:1560810]	0.348704	0.346682	0.160939	0.424374	1.26822	0.783325	0.345861	-1.53174	down
GO:0016021	integral component of membrane	cellular_component	5	5.31034e-06	ENSRNOG00000007811	Klrb1c	killer cell lectin-like receptor subfamily B member 1C [Source:RGD Symbol;Acc:1583336]	0.990474	1.01553	0.280973	3.16444	5.81491	2.6562	0.196551	-2.34703	down
GO:0016021	integral component of membrane	cellular_component	5	5.31034e-06	ENSRNOG00000007951	Galnt14	polypeptide N-acetylgalactosaminyltransferase 14 [Source:RGD Symbol;Acc:1310068]	0.090449	0.144045	0.187898	1.22288	1.53036	1.57812	0.0975195	-3.35817	down
GO:0016021	integral component of membrane	cellular_component	5	5.31034e-06	ENSRNOG00000008012	Abcb4	ATP binding cassette subfamily B member 1A [Source:RGD Symbol;Acc:619951]	3.31043	3.55892	2.92492	5.5518	10.3897	15.0847	0.315677	-1.66348	down
GO:0016021	integral component of membrane	cellular_component	5	5.31034e-06	ENSRNOG00000008045	Slamf9	SLAM family member 9 [Source:RGD Symbol;Acc:1305945]	11.9408	9.70843	8.20685	2.51174	2.76866	6.22624	2.59468	1.37556	up
GO:0016021	integral component of membrane	cellular_component	5	5.31034e-06	ENSRNOG00000008078	Kcnh6	potassium voltage-gated channel subfamily H member 6 [Source:RGD Symbol;Acc:620304]	0.272758	0.379062	0.222964	0.681142	0.993959	0.953564	0.332786	-1.58733	down
GO:0016021	integral component of membrane	cellular_component	5	5.31034e-06	ENSRNOG00000008169	Slc24a2	solute carrier family 24 member 2 [Source:RGD Symbol;Acc:628650]	0	0.00683712	0	0.0330464	0.0311626	0.0279681	0.0741737	-3.75295	down
GO:0016021	integral component of membrane	cellular_component	5	5.31034e-06	ENSRNOG00000008170	Jph2	junctophilin 2 [Source:RGD Symbol;Acc:1305196]	4.6606	5.56357	4.2155	1.9246	1.76306	2.59185	2.29949	1.20131	up
GO:0016021	integral component of membrane	cellular_component	5	5.31034e-06	ENSRNOG00000008223	Cnr1	cannabinoid receptor 1 [Source:RGD Symbol;Acc:2369]	1.5166	1.73802	1.62987	3.34558	5.79038	5.24774	0.339586	-1.55815	down
GO:0016021	integral component of membrane	cellular_component	5	5.31034e-06	ENSRNOG00000008243	Slc43a1	solute carrier family 43 member 1 [Source:RGD Symbol;Acc:1308229]	1.52253	1.56172	1.37251	3.14306	3.64088	3.81409	0.420527	-1.24973	down
GO:0016021	integral component of membrane	cellular_component	5	5.31034e-06	ENSRNOG00000008465	Tmem176b	transmembrane protein 176B [Source:RGD Symbol;Acc:708403]	147.986	131.769	149.539	63.1588	54.713	59.8402	2.41567	1.27242	up
GO:0016021	integral component of membrane	cellular_component	5	5.31034e-06	ENSRNOG00000008481	Reep1	receptor accessory protein 1 [Source:RGD Symbol;Acc:1305230]	7.42102	9.75981	9.23781	3.80393	3.54144	5.15901	2.11275	1.07912	up
GO:0016021	integral component of membrane	cellular_component	5	5.31034e-06	ENSRNOG00000008586	Aldh1l2	aldehyde dehydrogenase 1 family, member L2 [Source:RGD Symbol;Acc:1309458]	1.58045	0.639397	1.11351	0	0.019518	0.05896	42.4751	5.40855	up
GO:0016021	integral component of membrane	cellular_component	5	5.31034e-06	ENSRNOG00000008587	Tek	TEK receptor tyrosine kinase [Source:RGD Symbol;Acc:620980]	65.5676	80.6655	55.963	143.626	152.459	196.801	0.410229	-1.2855	down
GO:0016021	integral component of membrane	cellular_component	5	5.31034e-06	ENSRNOG00000008736	Slamf8	SLAM family member 8 [Source:RGD Symbol;Acc:1306263]	9.14949	5.80833	6.86472	2.91236	2.14446	2.65211	2.83081	1.50122	up
GO:0016021	integral component of membrane	cellular_component	5	5.31034e-06	ENSRNOG00000008759	Csf3r	colony stimulating factor 3 receptor [Source:RGD Symbol;Acc:1309114]	4.8101	3.47951	3.78326	8.0264	6.94395	12.168	0.444864	-1.16856	down
GO:0016021	integral component of membrane	cellular_component	5	5.31034e-06	ENSRNOG00000008816	Gpnmb	glycoprotein nmb [Source:RGD Symbol;Acc:71008]	364.08	375.726	301.379	194.008	146.217	143.748	2.15133	1.10523	up
GO:0016021	integral component of membrane	cellular_component	5	5.31034e-06	ENSRNOG00000008847	Gja3	gap junction protein, alpha 3 [Source:RGD Symbol;Acc:621820]	1.30538	1.15362	0.573995	0.089683	0	0	33.8191	5.07976	up
GO:0016021	integral component of membrane	cellular_component	5	5.31034e-06	ENSRNOG00000008970	Pcdh17	protocadherin 17 [Source:RGD Symbol;Acc:1304753]	4.9088	7.17492	5.10665	1.79822	1.68239	3.28292	2.54163	1.34575	up
GO:0016021	integral component of membrane	cellular_component	5	5.31034e-06	ENSRNOG00000009074	AABR07017902		2.3962	2.25633	1.98717	4.91184	5.22508	4.44929	0.455205	-1.13541	down
GO:0016021	integral component of membrane	cellular_component	5	5.31034e-06	ENSRNOG00000009177	Fcer1a	Fc fragment of IgE receptor Ia [Source:RGD Symbol;Acc:2597]	11.7309	2.89785	1.78742	1.47421	0.54891	1.09037	5.27258	2.39851	up
GO:0016021	integral component of membrane	cellular_component	5	5.31034e-06	ENSRNOG00000009522	Adra1a	adrenoceptor alpha 1A [Source:RGD Symbol;Acc:2055]	0.443506	0.522418	0.301567	0.884054	1.07486	0.934857	0.438007	-1.19097	down
GO:0016021	integral component of membrane	cellular_component	5	5.31034e-06	ENSRNOG00000009550	Sqle	squalene epoxidase [Source:RGD Symbol;Acc:3755]	22.9871	21.7869	26.6327	9.24737	11.5698	9.95486	2.3205	1.21444	up
GO:0016021	integral component of membrane	cellular_component	5	5.31034e-06	ENSRNOG00000009711	Hepacam2	HEPACAM family member 2 [Source:RGD Symbol;Acc:1305697]	0.708103	1.35279	0.559108	2.9919	1.63959	4.43232	0.289062	-1.79055	down
GO:0016021	integral component of membrane	cellular_component	5	5.31034e-06	ENSRNOG00000009730	Cyp7b1	cytochrome P450 family 7 subfamily B member 1 [Source:RGD Symbol;Acc:2483]	2.71878	2.18867	3.39701	0.862637	0.912831	0.982169	3.01144	1.59045	up
GO:0016021	integral component of membrane	cellular_component	5	5.31034e-06	ENSRNOG00000009772	Kirrel3	kirre like nephrin family adhesion molecule 3 [Source:RGD Symbol;Acc:1311382]	0.398434	0.0870737	0.296985	0.0744089	0.0865373	0.0818161	3.22329	1.68853	up
GO:0016021	integral component of membrane	cellular_component	5	5.31034e-06	ENSRNOG00000009797	Aqp3	aquaporin 3 (Gill blood group) [Source:RGD Symbol;Acc:68428]	3.62979	2.28961	3.88561	1.14161	1.26799	1.12825	2.77146	1.47065	up
GO:0016021	integral component of membrane	cellular_component	5	5.31034e-06	ENSRNOG00000010045	Clec4a	C-type lectin domain family 4, member A [Source:RGD Symbol;Acc:1359662]	2.66094	2.13175	1.39653	0.619083	0.217572	0.456681	4.78547	2.25866	up
GO:0016021	integral component of membrane	cellular_component	5	5.31034e-06	ENSRNOG00000010053	Calcr	calcitonin receptor [Source:RGD Symbol;Acc:621001]	0.034106	0.112382	0.012473	0	0	0	529.87	9.04949	up
GO:0016021	integral component of membrane	cellular_component	5	5.31034e-06	ENSRNOG00000010057	Clec4n	C-type lectin domain family 4, member n [Source:MGI Symbol;Acc:MGI:1861231]	0	1.03321	0.413927	0	0	0	4823.8	12.236	up
GO:0016021	integral component of membrane	cellular_component	5	5.31034e-06	ENSRNOG00000010094	Kcnmb2	potassium calcium-activated channel subfamily M regulatory beta subunit 2 [Source:RGD Symbol;Acc:631398]	1.40528	2.08716	1.42193	5.02584	6.16009	4.12691	0.320931	-1.63967	down
GO:0016021	integral component of membrane	cellular_component	5	5.31034e-06	ENSRNOG00000010128	Slc27a2	solute carrier family 27 member 2 [Source:RGD Symbol;Acc:71103]	3.21736	3.38317	1.37649	6.03212	9.70481	6.80912	0.353811	-1.49895	down
GO:0016021	integral component of membrane	cellular_component	5	5.31034e-06	ENSRNOG00000010210	Slc7a11	solute carrier family 7 member 11 [Source:RGD Symbol;Acc:1309275]	0.785658	0.686638	0.778759	0.156645	0.128973	0.154433	5.11544	2.35486	up
GO:0016021	integral component of membrane	cellular_component	5	5.31034e-06	ENSRNOG00000010263	Cldn11	claudin 11 [Source:RGD Symbol;Acc:71081]	9.74336	8.428	8.69926	2.68847	2.864	2.8561	3.19562	1.6761	up
GO:0016021	integral component of membrane	cellular_component	5	5.31034e-06	ENSRNOG00000010378	Slc4a5	solute carrier family 4 member 5 [Source:RGD Symbol;Acc:1303009]	2.89448	2.36503	2.37639	3.52175	6.06493	6.19471	0.483855	-1.04735	down
GO:0016021	integral component of membrane	cellular_component	5	5.31034e-06	ENSRNOG00000010430	Tmem40	transmembrane protein 40 [Source:RGD Symbol;Acc:1587025]	3.56084	1.09819	3.71541	0.60677	0.531598	0.648647	4.68627	2.22844	up
GO:0016021	integral component of membrane	cellular_component	5	5.31034e-06	ENSRNOG00000010451	Slc34a3	solute carrier family 34 member 3 [Source:RGD Symbol;Acc:708551]	1.00149	1.46258	0.41017	1.4268	3.30017	2.4283	0.401696	-1.31582	down
GO:0016021	integral component of membrane	cellular_component	5	5.31034e-06	ENSRNOG00000010461	Gpx8	glutathione peroxidase 8 [Source:RGD Symbol;Acc:1307506]	21.4849	17.7639	19.6333	10.0044	7.93017	11.1224	2.02644	1.01895	up
GO:0016021	integral component of membrane	cellular_component	5	5.31034e-06	ENSRNOG00000010497	RGD1305807	hypothetical LOC298077 [Source:RGD Symbol;Acc:1305807]	1.2705	1.26861	0.721183	0.224791	0.197968	0.313473	4.42835	2.14677	up
GO:0016021	integral component of membrane	cellular_component	5	5.31034e-06	ENSRNOG00000010718	Gpr153	G protein-coupled receptor 153 [Source:RGD Symbol;Acc:1564170]	4.57911	3.93909	3.02877	1.68687	1.33322	1.30815	2.66782	1.41566	up
GO:0016021	integral component of membrane	cellular_component	5	5.31034e-06	ENSRNOG00000010938	Slc7a10	solute carrier family 7 member 10 [Source:RGD Symbol;Acc:621672]	2.47237	4.35761	1.5858	14.3698	20.2201	16.7844	0.163813	-2.60988	down
GO:0016021	integral component of membrane	cellular_component	5	5.31034e-06	ENSRNOG00000010947	Mmp14	matrix metallopeptidase 14 [Source:RGD Symbol;Acc:620198]	73.5681	51.0079	51.6732	22.5951	16.4562	16.8319	3.15389	1.65713	up
GO:0016021	integral component of membrane	cellular_component	5	5.31034e-06	ENSRNOG00000011032	Lhfpl2	LHFPL tetraspan subfamily member 2 [Source:RGD Symbol;Acc:1309869]	9.6935	7.98011	7.27565	3.3654	3.003	3.73877	2.46847	1.30362	up
GO:0016021	integral component of membrane	cellular_component	5	5.31034e-06	ENSRNOG00000011132	LOC100362814	hypothetical protein LOC100362814 [Source:RGD Symbol;Acc:2323964]	1.79993	1.55887	1.21359	0.2928	0.480162	0.757836	2.98693	1.57866	up
GO:0016021	integral component of membrane	cellular_component	5	5.31034e-06	ENSRNOG00000011133	Trpc4	transient receptor potential cation channel, subfamily C, member 4 [Source:RGD Symbol;Acc:621276]	0.274794	0.506195	0.397683	0.047885	0.130389	0.050748	5.14654	2.3636	up
GO:0016021	integral component of membrane	cellular_component	5	5.31034e-06	ENSRNOG00000011202	Chrna4	cholinergic receptor nicotinic alpha 4 subunit [Source:RGD Symbol;Acc:2346]	0.0771047	0.0859449	0.0798405	0.579064	0.546145	0.315917	0.168542	-2.56882	down
GO:0016021	integral component of membrane	cellular_component	5	5.31034e-06	ENSRNOG00000011478	Ackr4	atypical chemokine receptor 4 [Source:RGD Symbol;Acc:1596453]	3.742	6.72369	4.6503	10.6668	9.95579	14.6032	0.429117	-1.22056	down
GO:0016021	integral component of membrane	cellular_component	5	5.31034e-06	ENSRNOG00000011696	Lifr	LIF receptor subunit alpha [Source:RGD Symbol;Acc:621431]	14.613	20.5057	9.77783	34.2651	45.0252	57.9032	0.32725	-1.61154	down
GO:0016021	integral component of membrane	cellular_component	5	5.31034e-06	ENSRNOG00000011716	Degs2	delta(4)-desaturase, sphingolipid 2 [Source:RGD Symbol;Acc:1305023]	4.05956	3.67362	2.40716	1.00169	1.31274	2.01497	2.34221	1.22787	up
GO:0016021	integral component of membrane	cellular_component	5	5.31034e-06	ENSRNOG00000011800	F3	coagulation factor III, tissue factor [Source:RGD Symbol;Acc:2587]	167.292	169.907	352.923	54.9981	53.3236	44.8062	4.50683	2.17211	up
GO:0016021	integral component of membrane	cellular_component	5	5.31034e-06	ENSRNOG00000011858	Unc5d	unc-5 netrin receptor D [Source:RGD Symbol;Acc:1309245]	0.0139338	0	0	0.138865	0.363346	0.152365	0.0212868	-5.55389	down
GO:0016021	integral component of membrane	cellular_component	5	5.31034e-06	ENSRNOG00000011917	Cd79b	CD79b molecule [Source:RGD Symbol;Acc:620012]	6.72672	11.9204	3.28746	16.4707	21.2954	22.7769	0.362298	-1.46475	down
GO:0016021	integral component of membrane	cellular_component	5	5.31034e-06	ENSRNOG00000012036	Pcsk5	proprotein convertase subtilisin/kexin type 5 [Source:RGD Symbol;Acc:620326]	9.04096	7.64478	5.71483	3.04202	2.71739	3.25211	2.48577	1.31369	up
GO:0016021	integral component of membrane	cellular_component	5	5.31034e-06	ENSRNOG00000012367	Pcdh7	protocadherin 7 [Source:RGD Symbol;Acc:1303209]	2.73789	2.8915	4.27544	0.812085	0.617343	0.767092	4.50933	2.17291	up
GO:0016021	integral component of membrane	cellular_component	5	5.31034e-06	ENSRNOG00000012531	Ephb2	Eph receptor B2 [Source:RGD Symbol;Acc:1564232]	2.23762	1.21812	1.09861	0.747816	0.787266	0.556466	2.1775	1.12267	up
GO:0016021	integral component of membrane	cellular_component	5	5.31034e-06	ENSRNOG00000012609	Trdn	triadin [Source:RGD Symbol;Acc:619856]	0.202268	0.407141	0.261987	0.166639	0.0651528	0.0542694	3.04619	1.60701	up
GO:0016021	integral component of membrane	cellular_component	5	5.31034e-06	ENSRNOG00000012674	Adrb3	adrenoceptor beta 3 [Source:RGD Symbol;Acc:2061]	0.121313	0.023431	0.203623	0	0	0	1161.22	10.1814	up
GO:0016021	integral component of membrane	cellular_component	5	5.31034e-06	ENSRNOG00000012878	Atp7b	ATPase copper transporting beta [Source:RGD Symbol;Acc:2180]	0.320325	0.146971	0.19402	0.529415	0.815515	0.591864	0.341449	-1.55026	down
GO:0016021	integral component of membrane	cellular_component	5	5.31034e-06	ENSRNOG00000013072	Plxna4	plexin A4 [Source:RGD Symbol;Acc:1308074]	1.78533	2.28069	3.35861	1.37412	1.09053	1.0043	2.14031	1.09782	up
GO:0016021	integral component of membrane	cellular_component	5	5.31034e-06	ENSRNOG00000013231	Ptafr	platelet-activating factor receptor [Source:RGD Symbol;Acc:61897]	11.0138	10.7414	8.49307	4.64952	3.76824	5.12655	2.23329	1.15917	up
GO:0016021	integral component of membrane	cellular_component	5	5.31034e-06	ENSRNOG00000013426	Mrgprf	MAS related GPR family member F [Source:RGD Symbol;Acc:708478]	2.60155	2.03741	2.62881	0.959964	0.912788	1.25915	2.32056	1.21447	up
GO:0016021	integral component of membrane	cellular_component	5	5.31034e-06	ENSRNOG00000013481	Cdh11	cadherin 11 [Source:RGD Symbol;Acc:619742]	23.3785	20.9201	14.0615	9.11527	8.39271	4.83833	2.61162	1.38494	up
GO:0016021	integral component of membrane	cellular_component	5	5.31034e-06	ENSRNOG00000013554	Treml2	triggering receptor expressed on myeloid cells-like 2 [Source:RGD Symbol;Acc:1587039]	1.03119	1.02236	0.796585	2.14125	2.05629	2.85755	0.403984	-1.30763	down
GO:0016021	integral component of membrane	cellular_component	5	5.31034e-06	ENSRNOG00000013578	Trem2	triggering receptor expressed on myeloid cells 2 [Source:RGD Symbol;Acc:1309841]	38.0505	26.603	29.0729	10.8948	5.01708	5.6079	4.35536	2.12279	up
GO:0016021	integral component of membrane	cellular_component	5	5.31034e-06	ENSRNOG00000013616	Tmem213	transmembrane protein 213 [Source:RGD Symbol;Acc:1588740]	0	0	0	0.327609	0.347204	0.406307	0.00027749	-11.8153	down
GO:0016021	integral component of membrane	cellular_component	5	5.31034e-06	ENSRNOG00000013663	Tmem86a	transmembrane protein 86A [Source:RGD Symbol;Acc:1305749]	13.2326	10.2652	9.33516	4.47	4.26471	5.75643	2.26572	1.17997	up
GO:0016021	integral component of membrane	cellular_component	5	5.31034e-06	ENSRNOG00000013771	Clca2	chloride channel accessory 2 [Source:RGD Symbol;Acc:1304894]	2.50184	5.50497	3.12669	10.0809	13.6564	4.991	0.387543	-1.36757	down
GO:0016021	integral component of membrane	cellular_component	5	5.31034e-06	ENSRNOG00000013820	Tnfrsf14	TNF receptor superfamily member 14 [Source:RGD Symbol;Acc:1310115]	3.84677	5.07738	1.83973	8.30551	13.733	9.78681	0.338218	-1.56397	down
GO:0016021	integral component of membrane	cellular_component	5	5.31034e-06	ENSRNOG00000013869	Kcnj4	potassium voltage-gated channel subfamily J member 4 [Source:RGD Symbol;Acc:621436]	0.672457	0.651424	0.289846	1.83666	2.54504	2.38856	0.238355	-2.06881	down
GO:0016021	integral component of membrane	cellular_component	5	5.31034e-06	ENSRNOG00000013894	Gpr87	G protein-coupled receptor 87 [Source:RGD Symbol;Acc:1307852]	0.68135	0.403129	1.09111	0.191628	0.021803	0.083762	7.32047	2.87194	up
GO:0016021	integral component of membrane	cellular_component	5	5.31034e-06	ENSRNOG00000013953	Ntrk1	neurotrophic receptor tyrosine kinase 1 [Source:RGD Symbol;Acc:620144]	0.089799	0.0959429	0.0319835	0.269543	0.411822	0.210092	0.244236	-2.03366	down
GO:0016021	integral component of membrane	cellular_component	5	5.31034e-06	ENSRNOG00000014008	Mfsd2a	major facilitator superfamily domain containing 2A [Source:RGD Symbol;Acc:1310174]	4.5474	6.49541	9.92777	3.08814	1.91405	1.74594	3.10761	1.63581	up
GO:0016021	integral component of membrane	cellular_component	5	5.31034e-06	ENSRNOG00000014039	Sucnr1	succinate receptor 1 [Source:RGD Symbol;Acc:1303193]	0.121417	0.237802	0.071108	0	0	0	1434.42	10.4863	up
GO:0016021	integral component of membrane	cellular_component	5	5.31034e-06	ENSRNOG00000014046	Sertm1	serine-rich and transmembrane domain containing 1 [Source:RGD Symbol;Acc:1597355]	0.056028	0.184223	0.080136	0.402743	0.33153	0.386346	0.285902	-1.80641	down
GO:0016021	integral component of membrane	cellular_component	5	5.31034e-06	ENSRNOG00000014149	Npy1r	neuropeptide Y receptor Y1 [Source:RGD Symbol;Acc:3198]	0	0	0	0.222327	0.145005	0.166436	0.000562042	-10.797	down
GO:0016021	integral component of membrane	cellular_component	5	5.31034e-06	ENSRNOG00000014248	Erbb4	erb-b2 receptor tyrosine kinase 4 [Source:RGD Symbol;Acc:620486]	0.102964	0.118757	0.047957	0.602772	0.820792	0.860173	0.118086	-3.08209	down
GO:0016021	integral component of membrane	cellular_component	5	5.31034e-06	ENSRNOG00000014269	Cxcr2	C-X-C motif chemokine receptor 2 [Source:RGD Symbol;Acc:2906]	2.28515	1.28783	1.53123	4.02702	2.16233	5.47115	0.437735	-1.19187	down
GO:0016021	integral component of membrane	cellular_component	5	5.31034e-06	ENSRNOG00000014290	Grm1	glutamate metabotropic receptor 1 [Source:RGD Symbol;Acc:2742]	0.009912	0	0.015688	0.069331	0.104979	0.0226431	0.12998	-2.94364	down
GO:0016021	integral component of membrane	cellular_component	5	5.31034e-06	ENSRNOG00000014312	AC109737		7.70423	10.5911	7.80605	21.5784	28.0601	18.5958	0.382525	-1.38637	down
GO:0016021	integral component of membrane	cellular_component	5	5.31034e-06	ENSRNOG00000014343	Anln	anillin, actin binding protein [Source:RGD Symbol;Acc:1561367]	3.79359	3.64787	4.69117	0.776211	0.909042	1.15177	4.27653	2.09644	up
GO:0016021	integral component of membrane	cellular_component	5	5.31034e-06	ENSRNOG00000014398	Scara5	scavenger receptor class A, member 5 [Source:RGD Symbol;Acc:1306539]	14.978	8.12167	5.64247	2.21572	1.73413	2.82895	4.24	2.08406	up
GO:0016021	integral component of membrane	cellular_component	5	5.31034e-06	ENSRNOG00000014414	Qrfpr	pyroglutamylated RFamide peptide receptor [Source:RGD Symbol;Acc:728380]	0.29662	0.19831	0.06551	0.463403	1.08292	0.82244	0.236596	-2.0795	down
GO:0016021	integral component of membrane	cellular_component	5	5.31034e-06	ENSRNOG00000014477	Acvr2b	activin A receptor type 2B [Source:RGD Symbol;Acc:2028]	0.997803	0.727357	0.43188	1.44913	1.08119	1.98019	0.478225	-1.06424	down
GO:0016021	integral component of membrane	cellular_component	5	5.31034e-06	ENSRNOG00000014481	Adtrp	androgen-dependent TFPI-regulating protein [Source:RGD Symbol;Acc:1305679]	4.99979	4.28189	7.60994	2.40902	2.37779	1.80808	2.56132	1.35689	up
GO:0016021	integral component of membrane	cellular_component	5	5.31034e-06	ENSRNOG00000014603	Sgcg	sarcoglycan, gamma [Source:RGD Symbol;Acc:1359577]	13.5611	9.46866	11.7961	1.57006	3.5042	3.33878	4.13951	2.04946	up
GO:0016021	integral component of membrane	cellular_component	5	5.31034e-06	ENSRNOG00000014650	Sema4g	semaphorin 4G [Source:RGD Symbol;Acc:1310436]	1.18712	2.11551	3.10514	0.518269	1.28814	0.624573	2.63588	1.39828	up
GO:0016021	integral component of membrane	cellular_component	5	5.31034e-06	ENSRNOG00000014656	Cox8b	cytochrome c oxidase, subunit VIIIb [Source:RGD Symbol;Acc:2386]	0.277625	0.746188	0	2.00303	2.96552	3.64464	0.118866	-3.07259	down
GO:0016021	integral component of membrane	cellular_component	5	5.31034e-06	ENSRNOG00000014691	Ric3	RIC3 acetylcholine receptor chaperone [Source:RGD Symbol;Acc:1588939]	0.480001	0.272205	0.38127	0.888606	1.24696	0.624746	0.410634	-1.28408	down
GO:0016021	integral component of membrane	cellular_component	5	5.31034e-06	ENSRNOG00000014710	Prom2	prominin 2 [Source:RGD Symbol;Acc:621435]	0.437085	0.421635	0.275468	1.18475	1.00497	0.626021	0.402803	-1.31186	down
GO:0016021	integral component of membrane	cellular_component	5	5.31034e-06	ENSRNOG00000014751	Ret	ret proto-oncogene [Source:RGD Symbol;Acc:3556]	2.67711	3.95788	2.72819	6.89043	7.6607	6.25602	0.449998	-1.15201	down
GO:0016021	integral component of membrane	cellular_component	5	5.31034e-06	ENSRNOG00000014918	Klrg1	killer cell lectin like receptor G1 [Source:RGD Symbol;Acc:61978]	0.515422	1.04205	0.307714	4.26076	7.30657	3.73	0.121929	-3.03589	down
GO:0016021	integral component of membrane	cellular_component	5	5.31034e-06	ENSRNOG00000015260	Lpar3	lysophosphatidic acid receptor 3 [Source:RGD Symbol;Acc:620565]	4.46911	5.9081	4.11901	16.6929	15.1815	12.4222	0.327254	-1.61152	down
GO:0016021	integral component of membrane	cellular_component	5	5.31034e-06	ENSRNOG00000015498	Il17rb	interleukin 17 receptor B [Source:RGD Symbol;Acc:1311392]	0.268123	0.552621	0.235806	0.712137	0.650552	1.55407	0.362234	-1.46501	down
GO:0016021	integral component of membrane	cellular_component	5	5.31034e-06	ENSRNOG00000015562	Cdh17	cadherin 17 [Source:RGD Symbol;Acc:619748]	1.36051	1.62806	1.03261	0.423343	0.744103	0.576678	2.30556	1.20512	up
GO:0016021	integral component of membrane	cellular_component	5	5.31034e-06	ENSRNOG00000015599	Mall	mal, T-cell differentiation protein-like [Source:RGD Symbol;Acc:1310869]	0.840887	0.705742	1.06216	0.217972	0.098231	0.333969	4.01246	2.00449	up
GO:0016021	integral component of membrane	cellular_component	5	5.31034e-06	ENSRNOG00000015615	Tnfrsf11a	TNF receptor superfamily member 11A [Source:RGD Symbol;Acc:1563614]	11.8889	9.01333	10.4355	4.72597	5.05818	3.3997	2.37698	1.24913	up
GO:0016021	integral component of membrane	cellular_component	5	5.31034e-06	ENSRNOG00000015751	Cyp4f18	cytochrome P450, family 4, subfamily f, polypeptide 18 [Source:RGD Symbol;Acc:1305261]	0.660932	0.495019	0.399061	1.23611	0.994513	1.41844	0.42614	-1.2306	down
GO:0016021	integral component of membrane	cellular_component	5	5.31034e-06	ENSRNOG00000015781	Ndst3	N-deacetylase and N-sulfotransferase 3 [Source:RGD Symbol;Acc:1310960]	0.431496	0.427179	0.250883	0.048146	0	0.015921	17.3187	4.11426	up
GO:0016021	integral component of membrane	cellular_component	5	5.31034e-06	ENSRNOG00000015788	Adora3	adenosine receptor A3-like [Source:RGD Symbol;Acc:6491091]	0.981793	0.693858	1.55777	0.343286	0.434004	0.264949	3.10238	1.63338	up
GO:0016021	integral component of membrane	cellular_component	5	5.31034e-06	ENSRNOG00000015812	Tm4sf1	transmembrane 4 L six family member 1 [Source:RGD Symbol;Acc:1309652]	23.9109	21.1832	27.3262	7.96858	6.74601	7.48677	3.26197	1.70574	up
GO:0016021	integral component of membrane	cellular_component	5	5.31034e-06	ENSRNOG00000015867	Chst9	carbohydrate sulfotransferase 9 [Source:RGD Symbol;Acc:1307302]	1.67565	1.86712	0.808526	0.519235	0.670001	0.936684	2.04678	1.03336	up
GO:0016021	integral component of membrane	cellular_component	5	5.31034e-06	ENSRNOG00000015994	Cd3d	CD3d molecule [Source:RGD Symbol;Acc:2304]	2.36595	1.55482	1.11031	3.79028	4.24872	4.54988	0.399646	-1.32321	down
GO:0016021	integral component of membrane	cellular_component	5	5.31034e-06	ENSRNOG00000016091	Tmem169	transmembrane protein 169 [Source:RGD Symbol;Acc:1582820]	0.393983	0.380407	0.598006	1.59074	3.19474	2.11799	0.198798	-2.33062	down
GO:0016021	integral component of membrane	cellular_component	5	5.31034e-06	ENSRNOG00000016306	Adgrv1	adhesion G protein-coupled receptor V1 [Source:RGD Symbol;Acc:1562101]	0.213258	0.280477	0.140783	0.766308	0.792711	0.77095	0.272329	-1.87658	down
GO:0016021	integral component of membrane	cellular_component	5	5.31034e-06	ENSRNOG00000016311	Slc6a2	solute carrier family 6 member 2 [Source:RGD Symbol;Acc:621822]	2.44927	2.89957	2.3062	4.45632	13.7688	5.78796	0.318786	-1.64934	down
GO:0016021	integral component of membrane	cellular_component	5	5.31034e-06	ENSRNOG00000016337	Slc22a1	solute carrier family 22 member 1 [Source:RGD Symbol;Acc:3224]	0.503858	0.992112	0.350748	0.228038	0	0.02532	7.28897	2.86571	up
GO:0016021	integral component of membrane	cellular_component	5	5.31034e-06	ENSRNOG00000016587	Ninj1	ninjurin 1 [Source:RGD Symbol;Acc:3179]	63.3265	48.6124	53.9727	28.5	27.2451	25.7324	2.03629	1.02594	up
GO:0016021	integral component of membrane	cellular_component	5	5.31034e-06	ENSRNOG00000016603	Rtn2	reticulon 2 [Source:RGD Symbol;Acc:1303245]	4.1931	4.62683	4.26543	1.87655	2.11657	2.35239	2.06215	1.04415	up
GO:0016021	integral component of membrane	cellular_component	5	5.31034e-06	ENSRNOG00000016685	Mc5r	melanocortin 5 receptor [Source:RGD Symbol;Acc:3058]	0.309953	0.502618	0.655511	0.033918	0.163002	0.138928	4.37127	2.12805	up
GO:0016021	integral component of membrane	cellular_component	5	5.31034e-06	ENSRNOG00000016753	Slc14a1	solute carrier family 14 member 1 (Kidd blood group) [Source:RGD Symbol;Acc:3688]	1.22094	0.8442	0.32184	1.50486	2.50559	1.61079	0.424636	-1.2357	down
GO:0016021	integral component of membrane	cellular_component	5	5.31034e-06	ENSRNOG00000016887	Hrh4	histamine receptor H4 [Source:RGD Symbol;Acc:620631]	0.195294	0.196548	0.02878	0	0	0	1402.07	10.4533	up
GO:0016021	integral component of membrane	cellular_component	5	5.31034e-06	ENSRNOG00000017052	Pianp	PILR alpha associated neural protein [Source:RGD Symbol;Acc:1304952]	1.23172	1.28814	1.03497	0.447964	0.408872	0.324713	3.00861	1.5891	up
GO:0016021	integral component of membrane	cellular_component	5	5.31034e-06	ENSRNOG00000017073	Ca9	carbonic anhydrase 9 [Source:RGD Symbol;Acc:1306426]	0.801578	0.556378	0.76697	0.438567	0.152726	0.250439	2.52447	1.33598	up
GO:0016021	integral component of membrane	cellular_component	5	5.31034e-06	ENSRNOG00000017226	Slc2a4	solute carrier family 2 member 4 [Source:RGD Symbol;Acc:2711]	1.77573	2.8625	1.51947	0.725115	0.747971	0.866538	2.63192	1.39612	up
GO:0016021	integral component of membrane	cellular_component	5	5.31034e-06	ENSRNOG00000017256	Csprs	component of Sp100-rs [Source:RGD Symbol;Acc:1310830]	0.954962	1.33906	1.27513	7.13389	6.62798	4.1923	0.198792	-2.33067	down
GO:0016021	integral component of membrane	cellular_component	5	5.31034e-06	ENSRNOG00000017429	Lat	linker for activation of T cells [Source:RGD Symbol;Acc:620802]	7.77653	7.11948	5.88298	20.675	13.8754	9.08614	0.476183	-1.07041	down
GO:0016021	integral component of membrane	cellular_component	5	5.31034e-06	ENSRNOG00000017477	Mmp23	matrix metallopeptidase 23 [Source:RGD Symbol;Acc:620201]	9.53142	7.20412	8.46643	1.49011	1.53306	2.22156	4.8052	2.2646	up
GO:0016021	integral component of membrane	cellular_component	5	5.31034e-06	ENSRNOG00000017749	Nkg7	natural killer cell granule protein 7 [Source:RGD Symbol;Acc:621523]	9.42049	10.8068	6.11861	34.526	59.9061	31.0593	0.209942	-2.25194	down
GO:0016021	integral component of membrane	cellular_component	5	5.31034e-06	ENSRNOG00000017775	Slc5a1	solute carrier family 5 member 1 [Source:RGD Symbol;Acc:3713]	2.87528	4.73317	3.87475	10.0856	8.08971	9.71798	0.411683	-1.28039	down
GO:0016021	integral component of membrane	cellular_component	5	5.31034e-06	ENSRNOG00000017912	Atp2a3	ATPase sarcoplasmic/endoplasmic reticulum Ca2+ transporting 3 [Source:RGD Symbol;Acc:2175]	12.551	16.9266	8.49169	31.6859	39.3186	38.9107	0.345441	-1.53349	down
GO:0016021	integral component of membrane	cellular_component	5	5.31034e-06	ENSRNOG00000018267	B3gnt7	UDP-GlcNAc:betaGal beta-1,3-N-acetylglucosaminyltransferase 7 [Source:RGD Symbol;Acc:1310580]	19.4867	15.5362	22.6715	9.39762	9.61533	7.83939	2.14858	1.10338	up
GO:0016021	integral component of membrane	cellular_component	5	5.31034e-06	ENSRNOG00000018311	Cd19	CD19 molecule [Source:RGD Symbol;Acc:1309086]	2.21263	3.85382	0.701309	6.29733	6.57261	7.80581	0.327328	-1.61119	down
GO:0016021	integral component of membrane	cellular_component	5	5.31034e-06	ENSRNOG00000018384	Adam12	ADAM metallopeptidase domain 12 [Source:RGD Symbol;Acc:1583652]	2.89606	2.2266	2.01819	0.387369	0.422863	0.707964	4.70351	2.23374	up
GO:0016021	integral component of membrane	cellular_component	5	5.31034e-06	ENSRNOG00000018458	Ncr1	natural cytotoxicity triggering receptor 1 [Source:RGD Symbol;Acc:621288]	1.54927	1.5245	0.579818	5.21451	11.9914	5.65028	0.159851	-2.6452	down
GO:0016021	integral component of membrane	cellular_component	5	5.31034e-06	ENSRNOG00000018461	Pdgfrb	platelet derived growth factor receptor beta [Source:RGD Symbol;Acc:3285]	29.9477	33.1625	27.8463	12.2108	11.6934	13.6546	2.42171	1.27603	up
GO:0016021	integral component of membrane	cellular_component	5	5.31034e-06	ENSRNOG00000018551	Olr63	olfactory receptor 63 [Source:RGD Symbol;Acc:1332833]	0.49687	0.358602	0.316662	0	0.049987	0.053117	11.3685	3.50697	up
GO:0016021	integral component of membrane	cellular_component	5	5.31034e-06	ENSRNOG00000018606	Olr59	olfactory receptor 59 [Source:RGD Symbol;Acc:628858]	1.22605	1.00656	1.51125	0.252943	0.113819	0.193963	6.67682	2.73916	up
GO:0016021	integral component of membrane	cellular_component	5	5.31034e-06	ENSRNOG00000018644	Slc6a7	solute carrier family 6 member 7 [Source:RGD Symbol;Acc:620928]	0.159564	0.147534	0.217266	1.38866	1.04448	0.392996	0.185541	-2.43019	down
GO:0016021	integral component of membrane	cellular_component	5	5.31034e-06	ENSRNOG00000018715	Clec10a	C-type lectin domain containing 10A [Source:RGD Symbol;Acc:621158]	33.0976	29.2512	34.7233	11.6423	13.2868	14.9001	2.43721	1.28523	up
GO:0016021	integral component of membrane	cellular_component	5	5.31034e-06	ENSRNOG00000018749	Best4	bestrophin 4 [Source:RGD Symbol;Acc:1596200]	0.14605	0.250232	0.275089	0	0	0	2237.9	11.1279	up
GO:0016021	integral component of membrane	cellular_component	5	5.31034e-06	ENSRNOG00000018824	Slc7a5	solute carrier family 7 member 5 [Source:RGD Symbol;Acc:620639]	12.2242	9.97178	10.4806	4.96224	4.45553	5.61315	2.17396	1.12033	up
GO:0016021	integral component of membrane	cellular_component	5	5.31034e-06	ENSRNOG00000018827	LOC103694905	5-hydroxytryptamine receptor 7 [Source:RGD Symbol;Acc:9265298]	0.601136	0.302224	0.67299	0.12608	0.271302	0.0872331	3.25279	1.70168	up
GO:0016021	integral component of membrane	cellular_component	5	5.31034e-06	ENSRNOG00000018839	Ntrk2	neurotrophic receptor tyrosine kinase 2 [Source:RGD Symbol;Acc:3213]	2.74908	5.01041	5.1754	0.644865	1.09069	0.941283	4.83215	2.27267	up
GO:0016021	integral component of membrane	cellular_component	5	5.31034e-06	ENSRNOG00000019141	Ch25h	cholesterol 25-hydroxylase [Source:RGD Symbol;Acc:1310575]	13.2671	15.1262	19.7347	5.72503	6.0097	7.99649	2.43918	1.2864	up
GO:0016021	integral component of membrane	cellular_component	5	5.31034e-06	ENSRNOG00000019270	P2ry6	pyrimidinergic receptor P2Y6 [Source:RGD Symbol;Acc:620269]	4.58353	4.02383	4.23688	1.28928	1.36146	1.89351	2.82648	1.49901	up
GO:0016021	integral component of membrane	cellular_component	5	5.31034e-06	ENSRNOG00000019368	Scnn1a	sodium channel epithelial 1 alpha subunit [Source:RGD Symbol;Acc:3639]	58.4143	57.3811	52.8678	132.105	161.056	139.405	0.389913	-1.35878	down
GO:0016021	integral component of membrane	cellular_component	5	5.31034e-06	ENSRNOG00000019418	Lrrc4b	leucine rich repeat containing 4B [Source:RGD Symbol;Acc:1307121]	0.602003	0.66977	0.312421	0.048402	0.041537	0.169391	6.1088	2.61089	up
GO:0016021	integral component of membrane	cellular_component	5	5.31034e-06	ENSRNOG00000019447	Ecel1	endothelin converting enzyme-like 1 [Source:RGD Symbol;Acc:61806]	0.125468	0.19421	0.117384	0	0.032322	0	13.5221	3.75725	up
GO:0016021	integral component of membrane	cellular_component	5	5.31034e-06	ENSRNOG00000019587	Ptprn	protein tyrosine phosphatase, receptor type, N [Source:RGD Symbol;Acc:620777]	3.28822	1.58827	3.5683	0.133251	0.169668	0.090297	21.4762	4.42467	up
GO:0016021	integral component of membrane	cellular_component	5	5.31034e-06	ENSRNOG00000019606	Trpv3	transient receptor potential cation channel, subfamily V, member 3 [Source:RGD Symbol;Acc:1564531]	0.18442	0.282586	0.1821	0.341037	0.761587	0.430847	0.423292	-1.24027	down
GO:0016021	integral component of membrane	cellular_component	5	5.31034e-06	ENSRNOG00000019718	Galnt15	polypeptide N-acetylgalactosaminyltransferase 15 [Source:MGI Symbol;Acc:MGI:1926004]	2.06938	2.30788	0.814215	4.52076	3.49921	5.05571	0.397033	-1.33267	down
GO:0016021	integral component of membrane	cellular_component	5	5.31034e-06	ENSRNOG00000019958	Tmem151b	transmembrane protein 151B [Source:RGD Symbol;Acc:1562074]	0.589999	0.505993	0.237931	0.532644	1.92063	1.31646	0.353851	-1.49879	down
GO:0016021	integral component of membrane	cellular_component	5	5.31034e-06	ENSRNOG00000020025	LOC108348052	equilibrative nucleoside transporter 2 [Source:RGD Symbol;Acc:11407640]	1.6667	0.990481	1.98339	0.623536	0.835152	0.615058	2.23777	1.16206	up
GO:0016021	integral component of membrane	cellular_component	5	5.31034e-06	ENSRNOG00000020125	Cd79a	CD79a molecule [Source:NCBI gene;Acc:100913063]	8.42119	9.76417	4.53518	18.3341	24.286	24.9955	0.336025	-1.57336	down
GO:0016021	integral component of membrane	cellular_component	5	5.31034e-06	ENSRNOG00000020245	Syt8	synaptotagmin 8 [Source:RGD Symbol;Acc:68399]	1.23734	1.19775	0.66598	0.209552	0.373992	0.369861	3.25263	1.70161	up
GO:0016021	integral component of membrane	cellular_component	5	5.31034e-06	ENSRNOG00000020424	Plpp4	phospholipid phosphatase 4 [Source:RGD Symbol;Acc:1306289]	3.12649	6.2402	3.46409	6.16603	9.59589	10.4928	0.488704	-1.03297	down
GO:0016021	integral component of membrane	cellular_component	5	5.31034e-06	ENSRNOG00000020484	Trpm5	transient receptor potential cation channel, subfamily M, member 5 [Source:RGD Symbol;Acc:1310620]	0.828644	2.4085	1.50249	5.99927	5.86911	10.0597	0.216144	-2.20993	down
GO:0016021	integral component of membrane	cellular_component	5	5.31034e-06	ENSRNOG00000020557	Ryr1	ryanodine receptor 1 [Source:RGD Symbol;Acc:1586637]	0.0419302	0.0748344	0.0894049	0.149468	0.126131	0.169126	0.463588	-1.10908	down
GO:0016021	integral component of membrane	cellular_component	5	5.31034e-06	ENSRNOG00000020644	Nsg2	neuronal vesicle trafficking associated 2 [Source:RGD Symbol;Acc:1563944]	0.239327	0.163991	0.273699	0.601502	0.601184	0.580512	0.379665	-1.3972	down
GO:0016021	integral component of membrane	cellular_component	5	5.31034e-06	ENSRNOG00000020685	Atp12a	ATPase H+/K+ transporting non-gastric alpha2 subunit [Source:RGD Symbol;Acc:620569]	0.227258	0.0423923	0.0327056	0	0	0.0062545	48.3422	5.59521	up
GO:0016021	integral component of membrane	cellular_component	5	5.31034e-06	ENSRNOG00000020776	Dhcr7	7-dehydrocholesterol reductase [Source:RGD Symbol;Acc:621769]	7.09967	6.2079	8.41921	3.3248	2.93406	3.25449	2.28382	1.19145	up
GO:0016021	integral component of membrane	cellular_component	5	5.31034e-06	ENSRNOG00000020817	Cyp2a1	cytochrome P450, family 2, subfamily a, polypeptide 1 [Source:RGD Symbol;Acc:2463]	0.757498	1.85236	0.153464	4.01074	10.1188	5.85792	0.138253	-2.85462	down
GO:0016021	integral component of membrane	cellular_component	5	5.31034e-06	ENSRNOG00000020833	Cspg5	chondroitin sulfate proteoglycan 5 [Source:RGD Symbol;Acc:2431]	1.75019	1.13536	1.45737	0.651899	0.3339	0.446318	3.03251	1.60051	up
GO:0016021	integral component of membrane	cellular_component	5	5.31034e-06	ENSRNOG00000020837	Cd300lg	Cd300 molecule-like family member G [Source:RGD Symbol;Acc:1584376]	2.49854	1.52889	1.01434	0.510611	0.335303	0.429242	3.95385	1.98326	up
GO:0016021	integral component of membrane	cellular_component	5	5.31034e-06	ENSRNOG00000020872	Cd5	Cd5 molecule [Source:RGD Symbol;Acc:2309]	1.31989	1.78453	0.988091	2.41024	3.58804	2.67734	0.471726	-1.08398	down
GO:0016021	integral component of membrane	cellular_component	5	5.31034e-06	ENSRNOG00000020901	S1pr5	sphingosine-1-phosphate receptor 5 [Source:RGD Symbol;Acc:620566]	1.79483	2.09013	0.765311	6.22649	10.6507	5.08636	0.211726	-2.23973	down
GO:0016021	integral component of membrane	cellular_component	5	5.31034e-06	ENSRNOG00000020945	Ms4a1	membrane spanning 4-domains A1 [Source:RGD Symbol;Acc:1311999]	4.43913	5.71531	1.88153	8.95523	11.7632	12.6719	0.360463	-1.47208	down
GO:0016021	integral component of membrane	cellular_component	5	5.31034e-06	ENSRNOG00000020948	Pth1r	parathyroid hormone 1 receptor [Source:RGD Symbol;Acc:3442]	8.63491	9.04509	5.00246	3.75007	3.62401	3.48961	2.08792	1.06206	up
GO:0016021	integral component of membrane	cellular_component	5	5.31034e-06	ENSRNOG00000020951	Slc4a1	solute carrier family 4 member 1 (Diego blood group) [Source:RGD Symbol;Acc:3710]	0.638523	0.746664	0.545707	0.794748	1.57508	1.55968	0.491384	-1.02508	down
GO:0016021	integral component of membrane	cellular_component	5	5.31034e-06	ENSRNOG00000020953	Ms4a7	membrane spanning 4-domains A7 [Source:RGD Symbol;Acc:1305549]	1.63496	2.75334	0.926093	0.648986	0.344616	0.486748	3.58996	1.84397	up
GO:0016021	integral component of membrane	cellular_component	5	5.31034e-06	ENSRNOG00000020980	AABR07006278		2.87125	2.21369	2.06295	12.7744	12.0944	13.6112	0.185756	-2.42852	down
GO:0016021	integral component of membrane	cellular_component	5	5.31034e-06	ENSRNOG00000020993	Ms4a2	membrane spanning 4-domains A2 [Source:RGD Symbol;Acc:2598]	7.02676	2.45204	1.76553	1.26067	0.858921	0.875766	3.75392	1.9084	up
GO:0016021	integral component of membrane	cellular_component	5	5.31034e-06	ENSRNOG00000020997	Ms4a4c	membrane-spanning 4-domains, subfamily A, member 4C [Source:RGD Symbol;Acc:1583863]	1.01351	1.91565	0.342927	3.28399	3.93249	3.57219	0.303289	-1.72123	down
GO:0016021	integral component of membrane	cellular_component	5	5.31034e-06	ENSRNOG00000021102	Scn1b	sodium voltage-gated channel beta subunit 1 [Source:RGD Symbol;Acc:3631]	4.98085	3.89237	4.76378	1.72275	2.14045	1.48102	2.55173	1.35147	up
GO:0016021	integral component of membrane	cellular_component	5	5.31034e-06	ENSRNOG00000021234	Slc4a11	solute carrier family 4 member 11 [Source:RGD Symbol;Acc:1310188]	0.702142	0.985659	0.608896	1.19925	2.21158	1.44058	0.473408	-1.07884	down
GO:0016021	integral component of membrane	cellular_component	5	5.31034e-06	ENSRNOG00000021345	Timd2	T-cell immunoglobulin and mucin domain containing 2 [Source:RGD Symbol;Acc:1359571]	0.239956	0.157775	0.042808	0.501432	0.440591	0.520114	0.301298	-1.73074	down
GO:0016021	integral component of membrane	cellular_component	5	5.31034e-06	ENSRNOG00000021499	Siglech	sialic acid binding Ig-like lectin H [Source:RGD Symbol;Acc:1310401]	0.452501	0.5536	0.363721	1.38958	1.72076	1.2407	0.314827	-1.66737	down
GO:0016021	integral component of membrane	cellular_component	5	5.31034e-06	ENSRNOG00000021521	Chst5	carbohydrate sulfotransferase 5 [Source:RGD Symbol;Acc:1561144]	1.28668	1.03946	1.2921	0.101173	0.216761	0.135007	7.98831	2.99789	up
GO:0016021	integral component of membrane	cellular_component	5	5.31034e-06	ENSRNOG00000021546	Sit1	signaling threshold regulating transmembrane adaptor 1 [Source:RGD Symbol;Acc:1559919]	1.21886	1.29213	0.752481	2.03769	2.86407	1.73952	0.491392	-1.02505	down
GO:0016021	integral component of membrane	cellular_component	5	5.31034e-06	ENSRNOG00000021586	Gpr39	G protein-coupled receptor 39 [Source:RGD Symbol;Acc:1306745]	2.77553	2.01092	3.19415	1.18388	1.06637	0.398209	3.0133	1.59134	up
GO:0016021	integral component of membrane	cellular_component	5	5.31034e-06	ENSRNOG00000021833	Myrfl	myelin regulatory factor-like [Source:RGD Symbol;Acc:1562127]	0.728024	0.569395	0.479107	0	0.052596	0	33.7768	5.07796	up
GO:0016021	integral component of membrane	cellular_component	5	5.31034e-06	ENSRNOG00000022116	Gjb6	gap junction protein, beta 6 [Source:RGD Symbol;Acc:621830]	0.943943	0.856139	0.717042	0.0421617	0.0923512	0.029796	15.3195	3.93729	up
GO:0016021	integral component of membrane	cellular_component	5	5.31034e-06	ENSRNOG00000022298	Cxcl11	C-X-C motif chemokine ligand 11 [Source:RGD Symbol;Acc:727827]	0.612395	0.600572	0.531235	0.05833	0.123484	0.076764	6.74536	2.7539	up
GO:0016021	integral component of membrane	cellular_component	5	5.31034e-06	ENSRNOG00000022309	Frem1	Fras1 related extracellular matrix 1 [Source:RGD Symbol;Acc:1306981]	1.56745	1.82675	0.915623	0.410153	0.33414	0.309213	4.09093	2.03243	up
GO:0016021	integral component of membrane	cellular_component	5	5.31034e-06	ENSRNOG00000022337	Slitrk6	SLIT and NTRK-like family, member 6 [Source:RGD Symbol;Acc:1306550]	1.30533	0.654949	0.307818	1.75266	1.89198	1.46716	0.443699	-1.17235	down
GO:0016021	integral component of membrane	cellular_component	5	5.31034e-06	ENSRNOG00000022432	Tmem59l	transmembrane protein 59-like [Source:RGD Symbol;Acc:1305557]	23.2422	20.085	18.2786	4.37018	5.80891	3.39922	4.53707	2.18176	up
GO:0016021	integral component of membrane	cellular_component	5	5.31034e-06	ENSRNOG00000022704	Esyt3	extended synaptotagmin 3 [Source:RGD Symbol;Acc:1561304]	4.60494	3.83258	4.8373	11.1262	11.8978	7.60453	0.433413	-1.20618	down
GO:0016021	integral component of membrane	cellular_component	5	5.31034e-06	ENSRNOG00000022863	Lingo4	leucine rich repeat and Ig domain containing 4 [Source:RGD Symbol;Acc:1562025]	0.086743	0.047725	0.048942	0.270502	0.160031	0.144919	0.318723	-1.64962	down
GO:0016021	integral component of membrane	cellular_component	5	5.31034e-06	ENSRNOG00000022910	Emcn	endomucin [Source:RGD Symbol;Acc:1303218]	87.7466	99.2771	101.343	37.7553	30.9035	51.7679	2.39454	1.25975	up
GO:0016021	integral component of membrane	cellular_component	5	5.31034e-06	ENSRNOG00000022946	Slc22a3	solute carrier family 22 member 3 [Source:RGD Symbol;Acc:3701]	2.51101	2.61626	2.08064	1.64762	0.870144	0.759034	2.19968	1.13729	up
GO:0016021	integral component of membrane	cellular_component	5	5.31034e-06	ENSRNOG00000022988	Skint10	selection and upkeep of intraepithelial T cells 10 [Source:RGD Symbol;Acc:1587504]	0	0	0	0.053746	0.037313	0.140697	0.00129446	-9.59343	down
GO:0016021	integral component of membrane	cellular_component	5	5.31034e-06	ENSRNOG00000023013	Marchf3	membrane associated ring-CH-type finger 3 [Source:RGD Symbol;Acc:1359308]	6.488	6.94006	8.58447	3.10545	3.14336	3.20733	2.32786	1.219	up
GO:0016021	integral component of membrane	cellular_component	5	5.31034e-06	ENSRNOG00000023030	Cd96	CD96 molecule [Source:RGD Symbol;Acc:1565249]	0.917836	1.14257	0.850143	2.44321	4.01199	2.42128	0.327894	-1.6087	down
GO:0016021	integral component of membrane	cellular_component	5	5.31034e-06	ENSRNOG00000023340	Tmem72	transmembrane protein 72 [Source:RGD Symbol;Acc:1308850]	0.133398	0.028516	0.059328	0.01853	0	0	11.9397	3.57769	up
GO:0016021	integral component of membrane	cellular_component	5	5.31034e-06	ENSRNOG00000023404	Slc9b2	solute carrier family 9 member B2 [Source:RGD Symbol;Acc:1598112]	0.303414	0.577356	0.481477	0.105687	0.05831	0.232987	3.43149	1.77884	up
GO:0016021	integral component of membrane	cellular_component	5	5.31034e-06	ENSRNOG00000023427	Ano7	anoctamin 7 [Source:RGD Symbol;Acc:1302987]	0.219094	0.383292	0.108748	0.759143	0.522614	0.748198	0.35032	-1.51325	down
GO:0016021	integral component of membrane	cellular_component	5	5.31034e-06	ENSRNOG00000023449	Atg9b	autophagy related 9B [Source:RGD Symbol;Acc:1560887]	0.216052	0.669278	0.15858	0	0	0.010716	97.416	6.60609	up
GO:0016021	integral component of membrane	cellular_component	5	5.31034e-06	ENSRNOG00000023536	Adgrd1	adhesion G protein-coupled receptor D1 [Source:RGD Symbol;Acc:1594795]	1.67392	1.22381	3.83552	1.14796	0.739109	0.855648	2.45495	1.2957	up
GO:0016021	integral component of membrane	cellular_component	5	5.31034e-06	ENSRNOG00000023664	Lepr	leptin receptor [Source:RGD Symbol;Acc:3001]	1.64218	1.61979	1.27077	3.58304	4.59652	3.2965	0.394973	-1.34017	down
GO:0016021	integral component of membrane	cellular_component	5	5.31034e-06	ENSRNOG00000023708	Tmem176a	transmembrane protein 176A [Source:RGD Symbol;Acc:1310725]	86.4905	72.3688	79.4893	26.3585	24.1076	27.3682	3.06226	1.61459	up
GO:0016021	integral component of membrane	cellular_component	5	5.31034e-06	ENSRNOG00000024000	Cd22	CD22 molecule [Source:RGD Symbol;Acc:1311610]	1.79374	2.41713	1.90355	4.4542	6.11548	6.36242	0.361114	-1.46947	down
GO:0016021	integral component of membrane	cellular_component	5	5.31034e-06	ENSRNOG00000024082	Gldn	gliomedin [Source:RGD Symbol;Acc:727879]	0.261012	0.245792	0.018752	0.020811	0.020345	0	12.7699	3.67467	up
GO:0016021	integral component of membrane	cellular_component	5	5.31034e-06	ENSRNOG00000024243	Cadm4	cell adhesion molecule 4 [Source:RGD Symbol;Acc:1304722]	7.99393	3.97126	4.65282	1.63577	1.41551	1.42201	3.71494	1.89334	up
GO:0016021	integral component of membrane	cellular_component	5	5.31034e-06	ENSRNOG00000024630	Igsf23	immunoglobulin superfamily, member 23 [Source:RGD Symbol;Acc:1564357]	0.838688	1.49341	1.06632	4.25733	1.67056	2.4069	0.407739	-1.29428	down
GO:0016021	integral component of membrane	cellular_component	5	5.31034e-06	ENSRNOG00000024766	Adgrf3	adhesion G protein-coupled receptor F3 [Source:RGD Symbol;Acc:1305868]	0.208267	0.136145	0.167132	0.00828533	0.0245291	0.0386773	7.15528	2.83901	up
GO:0016021	integral component of membrane	cellular_component	5	5.31034e-06	ENSRNOG00000024825	Fam163a	family with sequence similarity 163, member A [Source:RGD Symbol;Acc:1565760]	0.048157	0.072907	0.184433	0.313904	0.290393	0.365842	0.3149	-1.66703	down
GO:0016021	integral component of membrane	cellular_component	5	5.31034e-06	ENSRNOG00000024832	Gpr158	G protein-coupled receptor 158 [Source:RGD Symbol;Acc:1305841]	1.17708	0.959552	0.648521	1.57324	1.87641	2.42356	0.474213	-1.07639	down
GO:0016021	integral component of membrane	cellular_component	5	5.31034e-06	ENSRNOG00000025069	Ly9	lymphocyte antigen 9 [Source:RGD Symbol;Acc:1308341]	0.401783	0.581156	0.433835	0.873722	1.22197	1.58091	0.385349	-1.37576	down
GO:0016021	integral component of membrane	cellular_component	5	5.31034e-06	ENSRNOG00000025460	Tmem71	transmembrane protein 71 [Source:RGD Symbol;Acc:1593414]	3.51456	3.30072	2.30817	6.9326	6.41561	6.27142	0.465016	-1.10465	down
GO:0016021	integral component of membrane	cellular_component	5	5.31034e-06	ENSRNOG00000025463	LOC100125362	hypothetical protein LOC100125362 [Source:RGD Symbol;Acc:1642426]	0.276073	0.57715	0.407973	0.177287	0.075661	0.247052	2.52239	1.33479	up
GO:0016021	integral component of membrane	cellular_component	5	5.31034e-06	ENSRNOG00000025498	Crb2	crumbs cell polarity complex component 2 [Source:RGD Symbol;Acc:1309368]	1.62528	0.959169	2.13547	1.09475	0.725931	0.361578	2.16286	1.11294	up
GO:0016021	integral component of membrane	cellular_component	5	5.31034e-06	ENSRNOG00000025670	Shisa3	shisa family member 3 [Source:RGD Symbol;Acc:1565710]	0.046668	0.168977	0.09293	0	0	0	1028.58	10.0064	up
GO:0016021	integral component of membrane	cellular_component	5	5.31034e-06	ENSRNOG00000025882	Nipal1	NIPA-like domain containing 1 [Source:RGD Symbol;Acc:1310092]	0.60558	0.707535	0.460876	1.85872	2.94495	2.35827	0.247697	-2.01335	down
GO:0016021	integral component of membrane	cellular_component	5	5.31034e-06	ENSRNOG00000025930	Chst13	carbohydrate sulfotransferase 13 [Source:RGD Symbol;Acc:1562825]	0.338249	0.526967	0.373033	1.38668	2.5452	1.18454	0.242015	-2.04683	down
GO:0016021	integral component of membrane	cellular_component	5	5.31034e-06	ENSRNOG00000026039	Tspan32	tetraspanin 32 [Source:RGD Symbol;Acc:1308721]	2.79697	2.81695	1.569	4.94841	6.86574	4.37646	0.443647	-1.17252	down
GO:0016021	integral component of membrane	cellular_component	5	5.31034e-06	ENSRNOG00000026387	Ms4a12	membrane spanning 4-domains A12 [Source:RGD Symbol;Acc:1307162]	2.11021	0.377617	2.88393	0.273197	0.078292	0.40867	7.06662	2.82102	up
GO:0016021	integral component of membrane	cellular_component	5	5.31034e-06	ENSRNOG00000026592	Rhbdl2	rhomboid like 2 [Source:RGD Symbol;Acc:1308295]	3.95946	2.14383	3.47796	0.21293	0.386777	0	15.9766	3.99788	up
GO:0016021	integral component of membrane	cellular_component	5	5.31034e-06	ENSRNOG00000026607	Tnfsf18	TNF superfamily member 18 [Source:RGD Symbol;Acc:1305066]	0.492465	0.608781	1.13661	0.246963	0.212734	0.186109	3.46521	1.79294	up
GO:0016021	integral component of membrane	cellular_component	5	5.31034e-06	ENSRNOG00000026650	Tmprss4	transmembrane serine protease 4 [Source:RGD Symbol;Acc:1305033]	9.25698	9.40508	10.9804	4.1428	2.28956	3.55417	2.96825	1.56961	up
GO:0016021	integral component of membrane	cellular_component	5	5.31034e-06	ENSRNOG00000026902	Lyve1	lymphatic vessel endothelial hyaluronan receptor 1 [Source:RGD Symbol;Acc:1310864]	31.7248	32.3343	28.9423	85.5271	72.2486	105.709	0.352967	-1.50239	down
GO:0016021	integral component of membrane	cellular_component	5	5.31034e-06	ENSRNOG00000026953	Gpr88	G-protein coupled receptor 88 [Source:RGD Symbol;Acc:61921]	6.19663	4.05618	3.69675	1.48649	1.06613	1.54626	3.40326	1.76692	up
GO:0016021	integral component of membrane	cellular_component	5	5.31034e-06	ENSRNOG00000027042	Srd5a2	steroid 5 alpha-reductase 2 [Source:RGD Symbol;Acc:621480]	0.537245	0.386602	0.075472	0.095092	0.074204	0.030068	5.01253	2.32554	up
GO:0016021	integral component of membrane	cellular_component	5	5.31034e-06	ENSRNOG00000027060	Galr3	galanin receptor 3 [Source:RGD Symbol;Acc:2658]	0.295603	0.37482	0.596795	0.083968	0.075174	0	7.96281	2.99328	up
GO:0016021	integral component of membrane	cellular_component	5	5.31034e-06	ENSRNOG00000027232	Pcdhga11	protocadherin gamma subfamily A, 11 [Source:MGI Symbol;Acc:MGI:1935228]	0.300315	0.542542	0.551657	0.787219	1.01469	1.04364	0.490067	-1.02895	down
GO:0016021	integral component of membrane	cellular_component	5	5.31034e-06	ENSRNOG00000027253	Pcdhga10	protocadherin gamma subfamily A, 10 [Source:MGI Symbol;Acc:MGI:1935227]	1.08135	1.17897	0.689058	1.67217	2.19958	2.22987	0.483377	-1.04878	down
GO:0016021	integral component of membrane	cellular_component	5	5.31034e-06	ENSRNOG00000027276	Xkr4	XK related 4 [Source:RGD Symbol;Acc:1549780]	0.33812	0.578698	0.455447	0.932674	1.12401	0.933014	0.458998	-1.12344	down
GO:0016021	integral component of membrane	cellular_component	5	5.31034e-06	ENSRNOG00000027319	Ephx3	epoxide hydrolase 3 [Source:RGD Symbol;Acc:1307206]	2.78552	1.974	1.24645	0.71349	0.701439	1.22138	2.27818	1.18788	up
GO:0016021	integral component of membrane	cellular_component	5	5.31034e-06	ENSRNOG00000027380	Upk1b	uroplakin 1B [Source:RGD Symbol;Acc:1307806]	39.9999	29.1193	51.1765	23.4898	15.1861	9.59432	2.49213	1.31738	up
GO:0016021	integral component of membrane	cellular_component	5	5.31034e-06	ENSRNOG00000027466	Cd27	CD27 molecule [Source:RGD Symbol;Acc:1560499]	0.680023	0.426376	0.24904	1.10854	1.27048	1.14024	0.385149	-1.37651	down
GO:0016021	integral component of membrane	cellular_component	5	5.31034e-06	ENSRNOG00000027468	Slc6a15	solute carrier family 6 member 15 [Source:RGD Symbol;Acc:628664]	0	0.0388389	0.107525	0.154326	0.60116	0.31655	0.136529	-2.87272	down
GO:0016021	integral component of membrane	cellular_component	5	5.31034e-06	ENSRNOG00000027480	Tmem116	transmembrane protein 116 [Source:RGD Symbol;Acc:1596066]	2.91726	3.54035	4.64472	12.0029	12.3108	12.092	0.304961	-1.7133	down
GO:0016021	integral component of membrane	cellular_component	5	5.31034e-06	ENSRNOG00000027770	Trpm3	transient receptor potential cation channel, subfamily M, member 3 [Source:RGD Symbol;Acc:1304888]	0.087724	0.093788	0.050299	0.133919	0.194669	0.202468	0.43651	-1.19591	down
GO:0016021	integral component of membrane	cellular_component	5	5.31034e-06	ENSRNOG00000027801	Zpbp	zona pellucida binding protein [Source:RGD Symbol;Acc:1563985]	0	0	0	0.094269	0.048362	0.179848	0.000930293	-10.07	down
GO:0016021	integral component of membrane	cellular_component	5	5.31034e-06	ENSRNOG00000027847	Nxpe2	neurexophilin and PC-esterase domain family, member 2 [Source:RGD Symbol;Acc:2323193]	0.145881	0.102086	0.171438	0.243345	0.554683	1.0746	0.223966	-2.15865	down
GO:0016021	integral component of membrane	cellular_component	5	5.31034e-06	ENSRNOG00000028250	Lax1	lymphocyte transmembrane adaptor 1 [Source:RGD Symbol;Acc:1563522]	2.42339	2.90581	1.50243	6.84727	6.31232	5.75671	0.361151	-1.46933	down
GO:0016021	integral component of membrane	cellular_component	5	5.31034e-06	ENSRNOG00000028377	Mpl	MPL proto-oncogene, thrombopoietin receptor [Source:RGD Symbol;Acc:1311069]	0.300416	0.171127	0.164175	0.672625	0.583904	0.639335	0.335318	-1.5764	down
GO:0016021	integral component of membrane	cellular_component	5	5.31034e-06	ENSRNOG00000028436	Rprml	reprimo-like [Source:RGD Symbol;Acc:1589060]	0.841061	1.68142	0.666444	4.26932	4.51014	3.94521	0.250609	-1.99649	down
GO:0016021	integral component of membrane	cellular_component	5	5.31034e-06	ENSRNOG00000028636	Xkr5	XK related 5 [Source:RGD Symbol;Acc:1359335]	0.421441	0.797815	0.924239	0.17988	0.043679	0.105699	6.51008	2.70267	up
GO:0016021	integral component of membrane	cellular_component	5	5.31034e-06	ENSRNOG00000028982	Mrgprb3	MAS-related GPR, member B3 [Source:RGD Symbol;Acc:1587398]	1.66819	0.644348	0.296698	0.041133	0.177274	0.066794	9.14874	3.19357	up
GO:0016021	integral component of membrane	cellular_component	5	5.31034e-06	ENSRNOG00000029245	Gpr179	G protein-coupled receptor 179 [Source:RGD Symbol;Acc:1560033]	0.125705	0.0984336	0.115851	0.0175199	0.0620471	0.0234226	3.30121	1.72299	up
GO:0016021	integral component of membrane	cellular_component	5	5.31034e-06	ENSRNOG00000029342	Scn7a	sodium voltage-gated channel alpha subunit 7 [Source:RGD Symbol;Acc:61922]	34.779	50.2463	29.3145	11.5574	9.24312	13.5523	3.32839	1.73483	up
GO:0016021	integral component of membrane	cellular_component	5	5.31034e-06	ENSRNOG00000029465	Slc26a10	solute carrier family 26, member 10 [Source:RGD Symbol;Acc:1564851]	0.859141	0.559027	0.395777	0.0282012	0.178422	0.0435433	7.25095	2.85817	up
GO:0016021	integral component of membrane	cellular_component	5	5.31034e-06	ENSRNOG00000030246	Btla	B and T lymphocyte associated [Source:RGD Symbol;Acc:1303280]	1.45989	2.01238	0.634069	3.41534	2.9196	3.62967	0.412092	-1.27896	down
GO:0016021	integral component of membrane	cellular_component	5	5.31034e-06	ENSRNOG00000030269	Atp2b2	ATPase plasma membrane Ca2+ transporting 2 [Source:RGD Symbol;Acc:2176]	0.0144165	0.0177611	0.0181006	0.0829795	0.0884165	0.0269138	0.253534	-1.97975	down
GO:0016021	integral component of membrane	cellular_component	5	5.31034e-06	ENSRNOG00000030726	Asgr2	asialoglycoprotein receptor 2 [Source:RGD Symbol;Acc:2161]	2.34361	1.80753	2.56313	1.11066	0.695973	0.645904	2.73769	1.45296	up
GO:0016021	integral component of membrane	cellular_component	5	5.31034e-06	ENSRNOG00000030880	Hs6st2	heparan sulfate 6-O-sulfotransferase 2 [Source:RGD Symbol;Acc:1564397]	1.64491	1.22788	1.62933	0.761089	0.743889	0.689481	2.05159	1.03674	up
GO:0016021	integral component of membrane	cellular_component	5	5.31034e-06	ENSRNOG00000031024	Sirpd	signal-regulatory protein delta [Source:RGD Symbol;Acc:2321536]	0	0	0	0	0	1.21223	0.000247478	-11.9804	down
GO:0016021	integral component of membrane	cellular_component	5	5.31034e-06	ENSRNOG00000031249	Slco1a2	solute carrier organic anion transporter family, member 1A2 [Source:RGD Symbol;Acc:70985]	3.82369	4.11683	3.76795	8.07921	13.9358	10.8332	0.356442	-1.48826	down
GO:0016021	integral component of membrane	cellular_component	5	5.31034e-06	ENSRNOG00000031283	LOC103690878	syntaxin-3-like [Source:RGD Symbol;Acc:9098358]	0.058936	0.740364	0.265885	0.033198	0	0	32.0858	5.00386	up
GO:0016021	integral component of membrane	cellular_component	5	5.31034e-06	ENSRNOG00000031331	Fpr3	formyl peptide receptor 3 [Source:RGD Symbol;Acc:1566044]	0.670042	0.388245	0.195651	1.79457	4.39186	0.981199	0.174944	-2.51503	down
GO:0016021	integral component of membrane	cellular_component	5	5.31034e-06	ENSRNOG00000031443	Havcr2	hepatitis A virus cellular receptor 2 [Source:RGD Symbol;Acc:1305233]	1.59267	1.74202	1.71679	0.758987	0.444499	0.545722	2.88787	1.53	up
GO:0016021	integral component of membrane	cellular_component	5	5.31034e-06	ENSRNOG00000031536	Syndig1	synapse differentiation inducing 1 [Source:RGD Symbol;Acc:1310753]	2.1706	2.52956	1.43789	6.92794	5.38628	6.08379	0.333626	-1.5837	down
GO:0016021	integral component of membrane	cellular_component	5	5.31034e-06	ENSRNOG00000031802	LOC691427	similar to 6.8 kDa mitochondrial proteolipid [Source:RGD Symbol;Acc:1583946]	46.509	24.8187	30.019	15.217	14.0891	20.5056	2.0346	1.02474	up
GO:0016021	integral component of membrane	cellular_component	5	5.31034e-06	ENSRNOG00000031849	Armh4	armadillo-like helical domain containing 4 [Source:RGD Symbol;Acc:1310110]	1.59203	1.96891	1.4885	0.572696	0.421501	0.535934	3.3	1.72247	up
GO:0016021	integral component of membrane	cellular_component	5	5.31034e-06	ENSRNOG00000031890	Ncam1	neural cell adhesion molecule 1 [Source:RGD Symbol;Acc:67378]	1.037	0.705121	0.814697	0.302133	0.414242	0.372198	2.34878	1.23191	up
GO:0016021	integral component of membrane	cellular_component	5	5.31034e-06	ENSRNOG00000032297	Msmo1	methylsterol monooxygenase 1 [Source:RGD Symbol;Acc:620281]	33.1363	38.0268	45.4319	17.971	19.1653	18.6672	2.08939	1.06308	up
GO:0016021	integral component of membrane	cellular_component	5	5.31034e-06	ENSRNOG00000032417	Gabrp	gamma-aminobutyric acid type A receptor pi subunit [Source:RGD Symbol;Acc:620532]	3.74924	2.43961	2.02034	0.092348	0.19525	0.36241	12.6294	3.65871	up
GO:0016021	integral component of membrane	cellular_component	5	5.31034e-06	ENSRNOG00000032473	Scn10a	sodium voltage-gated channel alpha subunit 10 [Source:RGD Symbol;Acc:3629]	0.321816	0.410481	1.18959	0.079553	0.175059	0.119174	5.14167	2.36224	up
GO:0016021	integral component of membrane	cellular_component	5	5.31034e-06	ENSRNOG00000032699	Ttyh1	tweety family member 1 [Source:RGD Symbol;Acc:1310103]	0.26216	0.287879	0.123177	0.450375	0.597256	0.514098	0.431071	-1.214	down
GO:0016021	integral component of membrane	cellular_component	5	5.31034e-06	ENSRNOG00000032871	Mlc1	modulator of VRAC current 1 [Source:RGD Symbol;Acc:1308552]	0.751138	2.51677	1.04293	4.77344	7.48295	8.82703	0.204466	-2.29007	down
GO:0016021	integral component of membrane	cellular_component	5	5.31034e-06	ENSRNOG00000032970	Gpr174	G protein-coupled receptor 174 [Source:RGD Symbol;Acc:1564689]	0.527533	0.733647	0.262846	1.17419	1.70763	1.56916	0.342402	-1.54624	down
GO:0016021	integral component of membrane	cellular_component	5	5.31034e-06	ENSRNOG00000032973	Il13ra2	interleukin 13 receptor subunit alpha 2 [Source:RGD Symbol;Acc:620838]	0.829589	0.965275	0.72487	0.528699	0.130525	0.092317	3.35276	1.74535	up
GO:0016021	integral component of membrane	cellular_component	5	5.31034e-06	ENSRNOG00000033087	Cdh23	cadherin 23 (otocadherin) [Source:MGI Symbol;Acc:MGI:1890219]	0.141031	0.164882	0.211425	0.318243	0.551942	0.385107	0.412126	-1.27884	down
GO:0016021	integral component of membrane	cellular_component	5	5.31034e-06	ENSRNOG00000033192	Osmr	oncostatin M receptor [Source:RGD Symbol;Acc:1302983]	11.718	9.37308	19.7537	4.0249	3.86177	3.74351	3.51197	1.81228	up
GO:0016021	integral component of membrane	cellular_component	5	5.31034e-06	ENSRNOG00000033220	Oas1f	2 ' -5 ' oligoadenylate synthetase 1K [Source:RGD Symbol;Acc:1359279]	3.6928	3.76642	4.23323	6.69215	8.17991	12.1065	0.433399	-1.20623	down
GO:0016021	integral component of membrane	cellular_component	5	5.31034e-06	ENSRNOG00000033389	Susd2	sushi domain containing 2 [Source:RGD Symbol;Acc:1308595]	13.5958	14.6864	16.1139	28.3982	35.3903	27.6226	0.485676	-1.04193	down
GO:0016021	integral component of membrane	cellular_component	5	5.31034e-06	ENSRNOG00000033490	Vsig2	V-set and immunoglobulin domain containing 2 [Source:RGD Symbol;Acc:1561274]	1.47596	1.68532	1.4988	0.553579	0.75725	0.526275	2.53665	1.34292	up
GO:0016021	integral component of membrane	cellular_component	5	5.31034e-06	ENSRNOG00000033665	Mrgprx2	MAS related GPR family member X2 [Source:RGD Symbol;Acc:738048]	0.505871	0.534715	0.288598	0.087196	0.158129	0.11612	3.67742	1.87869	up
GO:0016021	integral component of membrane	cellular_component	5	5.31034e-06	ENSRNOG00000033815	AC142181		4.47581	4.18858	3.41656	9.26464	11.5382	8.85412	0.407357	-1.29564	down
GO:0016021	integral component of membrane	cellular_component	5	5.31034e-06	ENSRNOG00000033837	Cdh9	cadherin 9 [Source:RGD Symbol;Acc:1308343]	0.037874	0	0.027494	0.151011	0.255395	0.117604	0.124746	-3.00294	down
GO:0016021	integral component of membrane	cellular_component	5	5.31034e-06	ENSRNOG00000034164	Cr2	complement C3d receptor 2 [Source:RGD Symbol;Acc:1310065]	0.230317	0.706351	0.165545	1.71495	1.52249	1.68717	0.223817	-2.15961	down
GO:0016021	integral component of membrane	cellular_component	5	5.31034e-06	ENSRNOG00000034191	Fmo1	flavin containing dimethylaniline monoxygenase 1 [Source:RGD Symbol;Acc:2622]	38.1387	48.3555	27.5647	82.0484	87.3317	103.492	0.417994	-1.25844	down
GO:0016021	integral component of membrane	cellular_component	5	5.31034e-06	ENSRNOG00000034230	Fcrl1	Fc receptor-like 1 [Source:RGD Symbol;Acc:1589411]	1.06829	1.36213	0.215999	2.60728	1.84818	2.6139	0.37435	-1.41754	down
GO:0016021	integral component of membrane	cellular_component	5	5.31034e-06	ENSRNOG00000036672	Sectm1a	secreted and transmembrane 1A [Source:RGD Symbol;Acc:1305973]	0.810496	1.13994	0.922628	0.330433	0.082502	0.313546	3.95477	1.98359	up
GO:0016021	integral component of membrane	cellular_component	5	5.31034e-06	ENSRNOG00000036692	Gcgr	glucagon receptor [Source:RGD Symbol;Acc:2669]	2.41681	1.45819	0.552288	0.344226	0.244353	0.271724	5.1462	2.36351	up
GO:0016021	integral component of membrane	cellular_component	5	5.31034e-06	ENSRNOG00000036711	Spn	sialophorin [Source:RGD Symbol;Acc:3750]	8.72563	7.75418	4.61005	18.6749	31.2738	19.6607	0.302974	-1.72273	down
GO:0016021	integral component of membrane	cellular_component	5	5.31034e-06	ENSRNOG00000036760	Tmc5	transmembrane channel-like 5 [Source:RGD Symbol;Acc:1307037]	1.55746	1.69965	1.30723	0.353022	0.88123	0.567738	2.53295	1.34082	up
GO:0016021	integral component of membrane	cellular_component	5	5.31034e-06	ENSRNOG00000036834	Gpr84	G protein-coupled receptor 84 [Source:RGD Symbol;Acc:1585277]	0.362918	0.440914	0.558089	0.05425	0.066543	0.183613	4.47403	2.16157	up
GO:0016021	integral component of membrane	cellular_component	5	5.31034e-06	ENSRNOG00000036942	Tnfrsf9	TNF receptor superfamily member 9 [Source:RGD Symbol;Acc:1598208]	1.60567	0.978749	1.45256	0.415636	0.245613	0.343968	4.01603	2.00577	up
GO:0016021	integral component of membrane	cellular_component	5	5.31034e-06	ENSRNOG00000037076	LOC689757	similar to osteoclast inhibitory lectin [Source:RGD Symbol;Acc:1588731]	1.48897	0.842691	1.01231	0.263808	0.421097	0.30862	3.36576	1.75093	up
GO:0016021	integral component of membrane	cellular_component	5	5.31034e-06	ENSRNOG00000037219	RGD1562492	similar to Orphan sodium- and chloride-dependent neurotransmitter transporter NTT5 (Solute carrier family 6 member 16) [Source:RGD Symbol;Acc:1562492]	0.465548	0.792427	0.284264	1.06692	2.01591	2.05584	0.300124	-1.73637	down
GO:0016021	integral component of membrane	cellular_component	5	5.31034e-06	ENSRNOG00000037333	Cldnd2	claudin domain containing 2 [Source:RGD Symbol;Acc:1566413]	0.026835	0	0	0.380902	0.199238	0.217864	0.0336277	-4.89421	down
GO:0016021	integral component of membrane	cellular_component	5	5.31034e-06	ENSRNOG00000037467	Ffar3	free fatty acid receptor 3 [Source:RGD Symbol;Acc:1311035]	0.218127	0.129805	0.377051	0	0	0	2416.61	11.2388	up
GO:0016021	integral component of membrane	cellular_component	5	5.31034e-06	ENSRNOG00000037801	LOC100360238	rCG21419-like [Source:NCBI gene;Acc:100360238]	0.64068	0.715105	0.571117	2.16285	2.63506	2.7119	0.256585	-1.96249	down
GO:0016021	integral component of membrane	cellular_component	5	5.31034e-06	ENSRNOG00000037839	P2ry10	P2Y receptor family member 10 [Source:RGD Symbol;Acc:1561912]	3.24316	2.41494	2.67275	9.42408	11.0983	6.70997	0.305917	-1.70879	down
GO:0016021	integral component of membrane	cellular_component	5	5.31034e-06	ENSRNOG00000038413	Olr1433	olfactory receptor 1433 [Source:RGD Symbol;Acc:1332706]	0	0	0	0.082313	0.109445	0.139199	0.000906462	-10.1075	down
GO:0016021	integral component of membrane	cellular_component	5	5.31034e-06	ENSRNOG00000038483	AABR07018323		2.08589	2.64307	2.71567	1.01557	0.819177	1.31454	2.36391	1.24117	up
GO:0016021	integral component of membrane	cellular_component	5	5.31034e-06	ENSRNOG00000038896	Upk3bl1	uroplakin 3B like 1 [Source:RGD Symbol;Acc:1598237]	0.89875	0.627702	0.426773	0.049294	0.069493	0	16.4431	4.03941	up
GO:0016021	integral component of membrane	cellular_component	5	5.31034e-06	ENSRNOG00000039048	Cd200r1	CD200 receptor 1 [Source:RGD Symbol;Acc:61837]	5.71653	4.02752	3.70192	2.14652	2.09278	1.79409	2.22859	1.15613	up
GO:0016021	integral component of membrane	cellular_component	5	5.31034e-06	ENSRNOG00000039390	Slc37a2	solute carrier family 37 member 2 [Source:RGD Symbol;Acc:1564160]	4.37397	3.94469	3.23119	1.54409	1.38714	1.46315	2.62832	1.39414	up
GO:0016021	integral component of membrane	cellular_component	5	5.31034e-06	ENSRNOG00000039464	Tmem229a	transmembrane protein 229A [Source:RGD Symbol;Acc:1590212]	0.050166	0.089248	0.105383	0.243392	0.245278	0.47643	0.253649	-1.97909	down
GO:0016021	integral component of membrane	cellular_component	5	5.31034e-06	ENSRNOG00000039592	1700066B19Rik	RIKEN cDNA 1700066B19 gene [Source:MGI Symbol;Acc:MGI:1920699]	0.933715	0.387528	1.46341	0.191791	0.031615	0.017516	11.5583	3.53086	up
GO:0016021	integral component of membrane	cellular_component	5	5.31034e-06	ENSRNOG00000040109	Treml1	triggering receptor expressed on myeloid cells-like 1 [Source:RGD Symbol;Acc:1565175]	0.768813	1.13925	1.11172	2.6695	1.42442	2.67557	0.446087	-1.1646	down
GO:0016021	integral component of membrane	cellular_component	5	5.31034e-06	ENSRNOG00000042360	Treml4	triggering receptor expressed on myeloid cells-like 4 [Source:NCBI gene;Acc:680862]	0.457168	0.460439	0.885441	1.36922	2.41138	2.59653	0.282736	-1.82247	down
GO:0016021	integral component of membrane	cellular_component	5	5.31034e-06	ENSRNOG00000042524	Milr1	mast cell immunoglobulin-like receptor 1 [Source:NCBI gene;Acc:59105]	1.17017	0.767462	0.692324	0.449751	0.41522	0.412607	2.05855	1.04163	up
GO:0016021	integral component of membrane	cellular_component	5	5.31034e-06	ENSRNOG00000042596	Fam205a	family with sequence similarity 205, member A [Source:RGD Symbol;Acc:2320471]	0.37472	0.453575	0.312893	0.180592	0.184688	0.121562	2.34406	1.22901	up
GO:0016021	integral component of membrane	cellular_component	5	5.31034e-06	ENSRNOG00000043300	Enho	energy homeostasis associated [Source:RGD Symbol;Acc:6487582]	0.230999	0.373351	0.443866	0.637393	1.94628	0.837453	0.306395	-1.70653	down
GO:0016021	integral component of membrane	cellular_component	5	5.31034e-06	ENSRNOG00000045595	Tnfsf9	TNF superfamily member 9 [Source:RGD Symbol;Acc:727974]	2.88929	3.86285	2.14834	0.097061	0.890483	0.252154	7.17956	2.84389	up
GO:0016021	integral component of membrane	cellular_component	5	5.31034e-06	ENSRNOG00000045888	RGD1562667	similar to leukocyte mono-Ig-like receptor2 [Source:RGD Symbol;Acc:1562667]	2.91211	2.66229	1.63305	8.06814	17.2991	8.47844	0.21295	-2.23141	down
GO:0016021	integral component of membrane	cellular_component	5	5.31034e-06	ENSRNOG00000046184	RGD1561143	similar to cell surface receptor FDFACT [Source:RGD Symbol;Acc:1561143]	2.12842	1.09509	1.41583	3.14634	4.44466	3.00811	0.437711	-1.19195	down
GO:0016021	integral component of membrane	cellular_component	5	5.31034e-06	ENSRNOG00000046264	Pcdhb7	protocadherin beta 7 [Source:RGD Symbol;Acc:1309422]	1.23071	1.4461	0.622516	0.490801	0.423793	0.650195	2.10848	1.0762	up
GO:0016021	integral component of membrane	cellular_component	5	5.31034e-06	ENSRNOG00000046309	Gpr68	G protein-coupled receptor 68 [Source:RGD Symbol;Acc:1309559]	2.93661	2.55745	1.92341	1.0737	1.56286	0.844108	2.13105	1.09156	up
GO:0016021	integral component of membrane	cellular_component	5	5.31034e-06	ENSRNOG00000046601	Unc5cl	unc-5 family C-terminal like [Source:RGD Symbol;Acc:1587368]	1.24961	0.804409	0.119574	0.266412	0.207913	0.208789	3.18189	1.66988	up
GO:0016021	integral component of membrane	cellular_component	5	5.31034e-06	ENSRNOG00000046643	Cyp3a9	cytochrome P450, family 3, subfamily a, polypeptide 9 [Source:RGD Symbol;Acc:708392]	1.53291	1.42943	1.53715	3.08589	4.81783	3.05246	0.41068	-1.28391	down
GO:0016021	integral component of membrane	cellular_component	5	5.31034e-06	ENSRNOG00000046921	AABR07034986		0.241536	0.216421	0.266447	0	0	0	2414.68	11.2376	up
GO:0016021	integral component of membrane	cellular_component	5	5.31034e-06	ENSRNOG00000046958	Abo	ABO, alpha 1-3-N-acetylgalactosaminyltransferase and alpha 1-3-galactosyltransferase [Source:RGD Symbol;Acc:2307241]	4.12501	2.95025	2.83983	1.35281	1.56672	1.35476	2.31971	1.21394	up
GO:0016021	integral component of membrane	cellular_component	5	5.31034e-06	ENSRNOG00000047174	Pcdha4	protocadherin alpha 4 [Source:RGD Symbol;Acc:620337]	0.886611	1.47262	1.28061	0.561244	0.492371	0.567795	2.24486	1.16663	up
GO:0016021	integral component of membrane	cellular_component	5	5.31034e-06	ENSRNOG00000047218	Clic5	chloride intracellular channel 5 [Source:RGD Symbol;Acc:620659]	152.619	174.856	134.302	333.363	348.327	342.962	0.450667	-1.14986	down
GO:0016021	integral component of membrane	cellular_component	5	5.31034e-06	ENSRNOG00000047363	Kcnk13	potassium two pore domain channel subfamily K member 13 [Source:RGD Symbol;Acc:68941]	1.80257	1.54545	1.58185	0.623627	0.372461	0.656354	2.98338	1.57695	up
GO:0016021	integral component of membrane	cellular_component	5	5.31034e-06	ENSRNOG00000047457	AABR07071765		27.7215	37.9433	24.0929	77.7436	82.1178	128.006	0.311802	-1.6813	down
GO:0016021	integral component of membrane	cellular_component	5	5.31034e-06	ENSRNOG00000047864	LOC108348072	RT1 class II, locus DMa [Source:RGD Symbol;Acc:735053]	18.1206	19.1445	16.0483	10.0005	6.31184	7.37897	2.25034	1.17014	up
GO:0016021	integral component of membrane	cellular_component	5	5.31034e-06	ENSRNOG00000048145	Sstr1	somatostatin receptor 1 [Source:RGD Symbol;Acc:3762]	0.145416	0.387908	0.213102	1.29021	1.61171	1.86831	0.156476	-2.67599	down
GO:0016021	integral component of membrane	cellular_component	5	5.31034e-06	ENSRNOG00000048478	Kcne4	potassium voltage-gated channel subfamily E regulatory subunit 4 [Source:RGD Symbol;Acc:1302957]	3.14688	2.96047	4.13127	1.36349	0.872185	0.567874	3.65202	1.86869	up
GO:0016021	integral component of membrane	cellular_component	5	5.31034e-06	ENSRNOG00000048636	Il2rb	interleukin 2 receptor subunit beta [Source:RGD Symbol;Acc:2896]	6.32093	7.65754	3.20297	18.9429	37.4261	22.1126	0.218923	-2.1915	down
GO:0016021	integral component of membrane	cellular_component	5	5.31034e-06	ENSRNOG00000048771	RGD1559482	similar to immunoglobulin superfamily, member 7 [Source:RGD Symbol;Acc:1559482]	74.4604	58.4254	59.0465	30.4206	21.4603	16.897	2.79061	1.48058	up
GO:0016021	integral component of membrane	cellular_component	5	5.31034e-06	ENSRNOG00000048838	Gjc1	gap junction protein, gamma 1 [Source:RGD Symbol;Acc:628889]	12.3441	15.9848	12.8486	5.65756	6.29242	6.39129	2.24507	1.16676	up
GO:0016021	integral component of membrane	cellular_component	5	5.31034e-06	ENSRNOG00000048882	AABR07034992		2.01124	0.32813	1.06372	0	0	0	11343.6	13.4696	up
GO:0016021	integral component of membrane	cellular_component	5	5.31034e-06	ENSRNOG00000049331	LOC685048	similar to paired immunoglobin-like type 2 receptor beta [Source:RGD Symbol;Acc:1583253]	2.51799	2.60768	2.13998	1.03442	1.08332	1.01236	2.32122	1.21488	up
[truncated: 20,328 more rows]
