# Supplementary material for: Analysis of the Potential Relationship between Aging and Pulmonary Fibrosis Based on Transcriptome
Source: Life (Basel). 2022 Nov 23;12(12):1961. doi: 10.3390/life12121961 (PMC9788318; doi:10.3390/life12121961)
Supplement: Supplementary file 1 [file life-12-01961-s001.zip › Table S5-y-PF vs y-Sham KEGG enrichment Gene of Figure 3C.xlsx]

## Sheet: Sheet1
pathway_id	pathway_name	pvalue	Gene_ID	Gene_name	KO_ENTRY	EC	Description	FPKM.Y_PF1	FPKM.Y_PF2	FPKM.Y_PF3	FPKM.Y_Sham1	FPKM.Y_Sham2	FPKM.Y_Sham3	fc	log2(fc)	regulation
ko04974	Protein digestion and absorption	1.34174e-05	ENSRNOG00000001469	Eln	K14211	NA	elastin [Source:RGD Symbol;Acc:67394]	1211.58	1294.86	280.806	159.291	311.13	177.739	4.30024	2.10442	up
ko04974	Protein digestion and absorption	1.34174e-05	ENSRNOG00000003897	Col1a1	NA	NA	collagen type I alpha 1 chain [Source:RGD Symbol;Acc:61817]	126.27	249.911	273.591	58.1167	63.4283	51.677	3.75109	1.90731	up
ko04974	Protein digestion and absorption	1.34174e-05	ENSRNOG00000010935	Cpb2	K01300	EC:3.4.17.20	carboxypeptidase B2 [Source:RGD Symbol;Acc:71035]	0.417813	0.940398	0.194739	0	0	0	5176.5	12.3378	up
ko04974	Protein digestion and absorption	1.34174e-05	ENSRNOG00000011292	NEWGENE_621351	K06236	NA	collagen, type I, alpha 2 [Source:RGD Symbol;Acc:9452897]	134.308	280.185	220.805	65.4149	127.389	75.4797	2.36801	1.24368	up
ko04974	Protein digestion and absorption	1.34174e-05	ENSRNOG00000011598	Slc15a1	K14206	NA	solute carrier family 15 member 1 [Source:RGD Symbol;Acc:621736]	0.061492	0.060826	0.078949	0	0	0	670.89	9.38993	up
ko04974	Protein digestion and absorption	1.34174e-05	ENSRNOG00000023148	Col11a1	K19721	NA	collagen type XI alpha 1 chain [Source:RGD Symbol;Acc:2372]	0.411087	0.52551	0.885577	0.224042	0.278554	0.247892	2.42799	1.27976	up
ko04974	Protein digestion and absorption	1.34174e-05	ENSRNOG00000039197	LOC108348074	K08135	NA	collagen alpha-1(XV) chain-like [Source:RGD Symbol;Acc:11464459]	27.4934	28.1683	11.323	10.5648	7.14882	12.7016	2.20234	1.13904	up
ko04974	Protein digestion and absorption	1.34174e-05	ENSRNOG00000052925	NEWGENE_621351	K06236	NA	collagen, type I, alpha 2 [Source:RGD Symbol;Acc:9452897]	44.2462	78.2478	94.465	34.5066	31.6576	31.9137	2.21211	1.14542	up
ko04974	Protein digestion and absorption	1.34174e-05	ENSRNOG00000061939	LOC100911886	K19721	NA	collagen alpha-2(XI) chain-like [Source:RGD Symbol;Acc:6490199]	0.279907	0.304642	0.388628	1.18812	0.622541	1.26155	0.316767	-1.6585	down
ko04060	Cytokine-cytokine receptor interaction	0.000268706	ENSRNOG00000002978	Faslg	K04389	NA	Fas ligand [Source:RGD Symbol;Acc:3880]	0.709471	0.473535	1.27202	2.10948	1.83509	3.11962	0.347531	-1.52479	down
ko04060	Cytokine-cytokine receptor interaction	0.000268706	ENSRNOG00000002984	Bmp15	K05498	NA	bone morphogenetic protein 15 [Source:RGD Symbol;Acc:70990]	0.893187	0.650831	0.851556	2.84528	1.94488	1.92699	0.356635	-1.48748	down
ko04060	Cytokine-cytokine receptor interaction	0.000268706	ENSRNOG00000007002	Lif	K05419	NA	LIF, interleukin 6 family cytokine [Source:RGD Symbol;Acc:620865]	0.880568	1.01865	1.04408	0.472627	0.322036	0.294568	2.70218	1.43413	up
ko04060	Cytokine-cytokine receptor interaction	0.000268706	ENSRNOG00000010906	Ccl5	K12499	NA	C-C motif chemokine ligand 5 [Source:RGD Symbol;Acc:69069]	48.3284	41.7605	33.5398	89.039	63.5136	135.101	0.429784	-1.21832	down
ko04060	Cytokine-cytokine receptor interaction	0.000268706	ENSRNOG00000012286	Il20ra	K05136	NA	interleukin 20 receptor subunit alpha [Source:RGD Symbol;Acc:1307335]	0	0	0.758235	0	0	0	2527.45	11.3035	up
ko04060	Cytokine-cytokine receptor interaction	0.000268706	ENSRNOG00000016804	Il25	K05493	NA	interleukin 25 [Source:RGD Symbol;Acc:1561632]	0.051869	0.094698	0.050163	0.853721	0.318759	0.438559	0.122114	-3.0337	down
ko04060	Cytokine-cytokine receptor interaction	0.000268706	ENSRNOG00000021294	Mstn	NA	NA	myostatin [Source:RGD Symbol;Acc:3115]	0.059124	1.35602	0.037337	0	0	0	4841.6	12.2413	up
ko04060	Cytokine-cytokine receptor interaction	0.000268706	ENSRNOG00000028548	Ccl9	K22671	NA	chemokine (C-C motif) ligand 9 [Source:RGD Symbol;Acc:1310563]	31.354	22.2453	32.1143	12.7972	13.0843	8.17364	2.5169	1.33165	up
ko04060	Cytokine-cytokine receptor interaction	0.000268706	ENSRNOG00000031162	Ccl24	K21097	NA	C-C motif chemokine ligand 24 [Source:RGD Symbol;Acc:1310245]	2.95267	4.5172	2.6358	1.47836	0.899061	1.85835	2.38579	1.25447	up
ko04060	Cytokine-cytokine receptor interaction	0.000268706	ENSRNOG00000034290	Ccl21	K16062	NA	C-C motif chemokine ligand 21 [Source:RGD Symbol;Acc:1311996]	71.933	100.476	149.957	63.5991	39.5568	57.0998	2.01157	1.00832	up
ko04060	Cytokine-cytokine receptor interaction	0.000268706	ENSRNOG00000045595	Tnfsf9	K05472	NA	TNF superfamily member 9 [Source:RGD Symbol;Acc:727974]	1.37669	1.19038	1.76987	0.488094	0.275907	0.330177	3.96364	1.98683	up
ko04060	Cytokine-cytokine receptor interaction	0.000268706	ENSRNOG00000048239	Cxcr1	K04175	NA	C-X-C motif chemokine receptor 1 [Source:RGD Symbol;Acc:2905]	12.0581	12.2964	6.19431	5.02716	3.39089	4.10572	2.43926	1.28645	up
ko04060	Cytokine-cytokine receptor interaction	0.000268706	ENSRNOG00000054218	Il18rap	K05174	NA	interleukin 18 receptor accessory protein [Source:RGD Symbol;Acc:727867]	0.952382	0.874742	0.928804	2.62494	1.36523	2.00221	0.459906	-1.12059	down
ko04650	Natural killer cell mediated cytotoxicity	0.000674252	ENSRNOG00000000562	Prf1	K07818	NA	perforin 1 [Source:RGD Symbol;Acc:708463]	11.7317	8.28855	6.91728	21.9426	12.0857	30.3654	0.418325	-1.2573	down
ko04650	Natural killer cell mediated cytotoxicity	0.000674252	ENSRNOG00000002978	Faslg	K04389	NA	Fas ligand [Source:RGD Symbol;Acc:3880]	0.709471	0.473535	1.27202	2.10948	1.83509	3.11962	0.347531	-1.52479	down
ko04650	Natural killer cell mediated cytotoxicity	0.000674252	ENSRNOG00000003298	Cd247	K06453	NA	Cd247 molecule [Source:RGD Symbol;Acc:2305]	3.42781	2.27339	3.39083	5.96858	4.58895	7.66207	0.499025	-1.00282	down
ko04650	Natural killer cell mediated cytotoxicity	0.000674252	ENSRNOG00000006263	Sh2d1a	K07990	NA	SH2 domain containing 1A [Source:RGD Symbol;Acc:1562408]	0.762223	0.828636	1.31519	3.17378	2.3662	3.14758	0.334508	-1.57989	down
ko04650	Natural killer cell mediated cytotoxicity	0.000674252	ENSRNOG00000018458	Ncr1	K06741	NA	natural cytotoxicity triggering receptor 1 [Source:RGD Symbol;Acc:621288]	1.96699	1.6244	1.639	4.69858	2.21644	4.77204	0.447536	-1.15992	down
ko04650	Natural killer cell mediated cytotoxicity	0.000674252	ENSRNOG00000045973	Gzmb	K01353	EC:3.4.21.79	granzyme B [Source:RGD Symbol;Acc:620018]	2.25316	1.81994	1.79573	5.58483	4.29643	10.1425	0.293093	-1.77057	down
ko04650	Natural killer cell mediated cytotoxicity	0.000674252	ENSRNOG00000049976	Gzmbl2	K01353	EC:3.4.21.79	Granzyme B-like 2 [Source:RGD Symbol;Acc:2320097]	1.20768	0.713789	0.784046	3.07314	1.12515	4.83558	0.299486	-1.73944	down
ko04650	Natural killer cell mediated cytotoxicity	0.000674252	ENSRNOG00000060246	Klrd1	K06516	NA	killer cell lectin like receptor D1 [Source:RGD Symbol;Acc:2978]	3.34348	2.3231	3.44577	7.56228	4.74204	9.73844	0.413394	-1.27441	down
ko04978	Mineral absorption	0.000711916	ENSRNOG00000014117	Hmox1	K00510	EC:1.14.14.18	heme oxygenase 1 [Source:RGD Symbol;Acc:2806]	31.9406	70.2869	56.3487	14.3785	22.3463	16.8387	2.96053	1.56586	up
ko04978	Mineral absorption	0.000711916	ENSRNOG00000017775	Slc5a1	K14158	NA	solute carrier family 5 member 1 [Source:RGD Symbol;Acc:3713]	5.02389	3.24643	3.5349	9.53507	10.2527	6.94576	0.441589	-1.17922	down
ko04978	Mineral absorption	0.000711916	ENSRNOG00000031506	Ftl1	K13625	NA	ferritin light chain 1 [Source:RGD Symbol;Acc:61813]	52.0288	52.2376	40.6289	19.4586	27.1585	22.9462	2.08293	1.05861	up
ko04978	Mineral absorption	0.000711916	ENSRNOG00000038047	Mt1	K14739	NA	metallothionein 1 [Source:RGD Symbol;Acc:3117]	6.48477	4.81513	5.14986	2.71678	1.77605	2.19561	2.45943	1.29833	up
ko04978	Mineral absorption	0.000711916	ENSRNOG00000043098	Mt2A	K14739	NA	metallothionein 2A [Source:RGD Symbol;Acc:1592345]	22.5488	25.925	34.0743	11.7397	14.0395	14.0706	2.07148	1.05066	up
ko05332	Graft-versus-host disease	0.00140566	ENSRNOG00000000562	Prf1	K07818	NA	perforin 1 [Source:RGD Symbol;Acc:708463]	11.7317	8.28855	6.91728	21.9426	12.0857	30.3654	0.418325	-1.2573	down
ko05332	Graft-versus-host disease	0.00140566	ENSRNOG00000002978	Faslg	K04389	NA	Fas ligand [Source:RGD Symbol;Acc:3880]	0.709471	0.473535	1.27202	2.10948	1.83509	3.11962	0.347531	-1.52479	down
ko05332	Graft-versus-host disease	0.00140566	ENSRNOG00000045973	Gzmb	K01353	EC:3.4.21.79	granzyme B [Source:RGD Symbol;Acc:620018]	2.25316	1.81994	1.79573	5.58483	4.29643	10.1425	0.293093	-1.77057	down
ko05332	Graft-versus-host disease	0.00140566	ENSRNOG00000049976	Gzmbl2	K01353	EC:3.4.21.79	Granzyme B-like 2 [Source:RGD Symbol;Acc:2320097]	1.20768	0.713789	0.784046	3.07314	1.12515	4.83558	0.299486	-1.73944	down
ko05332	Graft-versus-host disease	0.00140566	ENSRNOG00000060246	Klrd1	K06516	NA	killer cell lectin like receptor D1 [Source:RGD Symbol;Acc:2978]	3.34348	2.3231	3.44577	7.56228	4.74204	9.73844	0.413394	-1.27441	down
ko04940	Type I diabetes mellitus	0.00269994	ENSRNOG00000000562	Prf1	K07818	NA	perforin 1 [Source:RGD Symbol;Acc:708463]	11.7317	8.28855	6.91728	21.9426	12.0857	30.3654	0.418325	-1.2573	down
ko04940	Type I diabetes mellitus	0.00269994	ENSRNOG00000002978	Faslg	K04389	NA	Fas ligand [Source:RGD Symbol;Acc:3880]	0.709471	0.473535	1.27202	2.10948	1.83509	3.11962	0.347531	-1.52479	down
ko04940	Type I diabetes mellitus	0.00269994	ENSRNOG00000019587	Ptprn	K07817	EC:3.1.3.48	protein tyrosine phosphatase, receptor type, N [Source:RGD Symbol;Acc:620777]	0.404913	0.311202	1.36381	0.178802	0.024688	0.090892	7.0654	2.82077	up
ko04940	Type I diabetes mellitus	0.00269994	ENSRNOG00000045973	Gzmb	K01353	EC:3.4.21.79	granzyme B [Source:RGD Symbol;Acc:620018]	2.25316	1.81994	1.79573	5.58483	4.29643	10.1425	0.293093	-1.77057	down
ko04940	Type I diabetes mellitus	0.00269994	ENSRNOG00000049976	Gzmbl2	K01353	EC:3.4.21.79	Granzyme B-like 2 [Source:RGD Symbol;Acc:2320097]	1.20768	0.713789	0.784046	3.07314	1.12515	4.83558	0.299486	-1.73944	down
ko05160	Hepatitis C	0.00301267	ENSRNOG00000001369	Oas1a	K14216	EC:2.7.7.84	2'-5' oligoadenylate synthetase 1A [Source:RGD Symbol;Acc:621760]	10.8024	8.5894	7.75613	18.5757	13.2011	25.5218	0.473796	-1.07766	down
ko05160	Hepatitis C	0.00301267	ENSRNOG00000001963	Mx2	K14754	NA	MX dynamin like GTPase 2 [Source:RGD Symbol;Acc:628821]	30.1994	23.4836	17.5537	60.3679	35.706	65.2539	0.441565	-1.1793	down
ko05160	Hepatitis C	0.00301267	ENSRNOG00000002978	Faslg	K04389	NA	Fas ligand [Source:RGD Symbol;Acc:3880]	0.709471	0.473535	1.27202	2.10948	1.83509	3.11962	0.347531	-1.52479	down
ko05160	Hepatitis C	0.00301267	ENSRNOG00000007539	Rsad2	K15045	NA	radical S-adenosyl methionine domain containing 2 [Source:RGD Symbol;Acc:620495]	4.92785	5.735	5.77652	12.456	7.58066	14.5645	0.475111	-1.07366	down
ko05160	Hepatitis C	0.00301267	ENSRNOG00000017414	Irf7	K09447	NA	interferon regulatory factor 7 [Source:RGD Symbol;Acc:1307828]	50.0909	39.3499	31.835	103.562	77.9961	166.957	0.347979	-1.52293	down
ko05160	Hepatitis C	0.00301267	ENSRNOG00000019050	Ifit1	K14217	NA	interferon-induced protein with tetratricopeptide repeats 1 [Source:RGD Symbol;Acc:620599]	10.0484	9.65548	5.40845	21.5586	30.666	25.6832	0.322334	-1.63337	down
ko05160	Hepatitis C	0.00301267	ENSRNOG00000033220	Oas1f	K14216	EC:2.7.7.84	2 ' -5 ' oligoadenylate synthetase 1K [Source:RGD Symbol;Acc:1359279]	5.23307	3.89105	3.42366	9.0953	7.36568	11.0517	0.456073	-1.13266	down
ko05160	Hepatitis C	0.00301267	ENSRNOG00000049282	Oas2	K14216	EC:2.7.7.84	2'-5' oligoadenylate synthetase 2 [Source:RGD Symbol;Acc:1359697]	5.96024	3.32075	3.13407	12.3504	5.63243	14.1955	0.385821	-1.374	down
ko05164	Influenza A	0.00414907	ENSRNOG00000001369	Oas1a	K14216	EC:2.7.7.84	2'-5' oligoadenylate synthetase 1A [Source:RGD Symbol;Acc:621760]	10.8024	8.5894	7.75613	18.5757	13.2011	25.5218	0.473796	-1.07766	down
ko05164	Influenza A	0.00414907	ENSRNOG00000001963	Mx2	K14754	NA	MX dynamin like GTPase 2 [Source:RGD Symbol;Acc:628821]	30.1994	23.4836	17.5537	60.3679	35.706	65.2539	0.441565	-1.1793	down
ko05164	Influenza A	0.00414907	ENSRNOG00000002978	Faslg	K04389	NA	Fas ligand [Source:RGD Symbol;Acc:3880]	0.709471	0.473535	1.27202	2.10948	1.83509	3.11962	0.347531	-1.52479	down
ko05164	Influenza A	0.00414907	ENSRNOG00000007539	Rsad2	K15045	NA	radical S-adenosyl methionine domain containing 2 [Source:RGD Symbol;Acc:620495]	4.92785	5.735	5.77652	12.456	7.58066	14.5645	0.475111	-1.07366	down
ko05164	Influenza A	0.00414907	ENSRNOG00000010906	Ccl5	K12499	NA	C-C motif chemokine ligand 5 [Source:RGD Symbol;Acc:69069]	48.3284	41.7605	33.5398	89.039	63.5136	135.101	0.429784	-1.21832	down
ko05164	Influenza A	0.00414907	ENSRNOG00000017414	Irf7	K09447	NA	interferon regulatory factor 7 [Source:RGD Symbol;Acc:1307828]	50.0909	39.3499	31.835	103.562	77.9961	166.957	0.347979	-1.52293	down
ko05164	Influenza A	0.00414907	ENSRNOG00000033220	Oas1f	K14216	EC:2.7.7.84	2 ' -5 ' oligoadenylate synthetase 1K [Source:RGD Symbol;Acc:1359279]	5.23307	3.89105	3.42366	9.0953	7.36568	11.0517	0.456073	-1.13266	down
ko05164	Influenza A	0.00414907	ENSRNOG00000049282	Oas2	K14216	EC:2.7.7.84	2'-5' oligoadenylate synthetase 2 [Source:RGD Symbol;Acc:1359697]	5.96024	3.32075	3.13407	12.3504	5.63243	14.1955	0.385821	-1.374	down
ko04210	Apoptosis	0.00632953	ENSRNOG00000000562	Prf1	K07818	NA	perforin 1 [Source:RGD Symbol;Acc:708463]	11.7317	8.28855	6.91728	21.9426	12.0857	30.3654	0.418325	-1.2573	down
ko04210	Apoptosis	0.00632953	ENSRNOG00000002978	Faslg	K04389	NA	Fas ligand [Source:RGD Symbol;Acc:3880]	0.709471	0.473535	1.27202	2.10948	1.83509	3.11962	0.347531	-1.52479	down
ko04210	Apoptosis	0.00632953	ENSRNOG00000020206	Ctsd	K01379	EC:3.4.23.5	cathepsin D [Source:RGD Symbol;Acc:621511]	548	744.981	848.372	316.023	357.412	293.272	2.2151	1.14737	up
ko04210	Apoptosis	0.00632953	ENSRNOG00000021155	Ctsk	NA	NA	cathepsin K [Source:RGD Symbol;Acc:61810]	8.68873	18.433	39.2286	5.53409	8.14942	6.72412	3.25125	1.70099	up
ko04210	Apoptosis	0.00632953	ENSRNOG00000045973	Gzmb	K01353	EC:3.4.21.79	granzyme B [Source:RGD Symbol;Acc:620018]	2.25316	1.81994	1.79573	5.58483	4.29643	10.1425	0.293093	-1.77057	down
ko04210	Apoptosis	0.00632953	ENSRNOG00000048169	Tuba8	K07374	NA	tubulin, alpha 8 [Source:RGD Symbol;Acc:1566041]	1.19674	1.13894	1.48065	0.209566	0.206161	0.258689	5.65872	2.50047	up
ko04210	Apoptosis	0.00632953	ENSRNOG00000049976	Gzmbl2	K01353	EC:3.4.21.79	Granzyme B-like 2 [Source:RGD Symbol;Acc:2320097]	1.20768	0.713789	0.784046	3.07314	1.12515	4.83558	0.299486	-1.73944	down
ko04614	Renin-angiotensin system	0.0104679	ENSRNOG00000020563	Cma1	K01329	EC:3.4.21.39	chymase 1 [Source:RGD Symbol;Acc:2365]	1.06288	11.2426	14.4618	0.948545	1.00838	1.53025	7.6759	2.94034	up
ko04614	Renin-angiotensin system	0.0104679	ENSRNOG00000051854	Enpep	K11141	EC:3.4.11.7	glutamyl aminopeptidase [Source:RGD Symbol;Acc:621228]	18.815	14.6776	10.9005	33.2081	30.5951	30.1322	0.472593	-1.08133	down
ko04614	Renin-angiotensin system	0.0104679	ENSRNOG00000053494	Mcpt1l1	K01329	EC:3.4.21.39	mast cell protease 1-like 1 [Source:RGD Symbol;Acc:2321286]	1.12638	24.7448	48.2037	0.458616	0.704795	1.42799	28.5849	4.83718	up
ko05330	Allograft rejection	0.0108721	ENSRNOG00000000562	Prf1	K07818	NA	perforin 1 [Source:RGD Symbol;Acc:708463]	11.7317	8.28855	6.91728	21.9426	12.0857	30.3654	0.418325	-1.2573	down
ko05330	Allograft rejection	0.0108721	ENSRNOG00000002978	Faslg	K04389	NA	Fas ligand [Source:RGD Symbol;Acc:3880]	0.709471	0.473535	1.27202	2.10948	1.83509	3.11962	0.347531	-1.52479	down
ko05330	Allograft rejection	0.0108721	ENSRNOG00000045973	Gzmb	K01353	EC:3.4.21.79	granzyme B [Source:RGD Symbol;Acc:620018]	2.25316	1.81994	1.79573	5.58483	4.29643	10.1425	0.293093	-1.77057	down
ko05330	Allograft rejection	0.0108721	ENSRNOG00000049976	Gzmbl2	K01353	EC:3.4.21.79	Granzyme B-like 2 [Source:RGD Symbol;Acc:2320097]	1.20768	0.713789	0.784046	3.07314	1.12515	4.83558	0.299486	-1.73944	down
ko04512	ECM-receptor interaction	0.0109301	ENSRNOG00000003897	Col1a1	NA	NA	collagen type I alpha 1 chain [Source:RGD Symbol;Acc:61817]	126.27	249.911	273.591	58.1167	63.4283	51.677	3.75109	1.90731	up
ko04512	ECM-receptor interaction	0.0109301	ENSRNOG00000010529	Thbs2	K04659	NA	thrombospondin 2 [Source:RGD Symbol;Acc:1310979]	2.57939	6.01878	6.82916	1.12399	1.12034	1.18604	4.49727	2.16905	up
ko04512	ECM-receptor interaction	0.0109301	ENSRNOG00000011292	NEWGENE_621351	K06236	NA	collagen, type I, alpha 2 [Source:RGD Symbol;Acc:9452897]	134.308	280.185	220.805	65.4149	127.389	75.4797	2.36801	1.24368	up
ko04512	ECM-receptor interaction	0.0109301	ENSRNOG00000043451	Spp1	K06250	NA	secreted phosphoprotein 1 [Source:RGD Symbol;Acc:3752]	5.06055	8.53045	47.2968	2.53233	1.09522	0.50064	14.7493	3.88257	up
ko04512	ECM-receptor interaction	0.0109301	ENSRNOG00000052925	NEWGENE_621351	K06236	NA	collagen, type I, alpha 2 [Source:RGD Symbol;Acc:9452897]	44.2462	78.2478	94.465	34.5066	31.6576	31.9137	2.21211	1.14542	up
ko05320	Autoimmune thyroid disease	0.0139526	ENSRNOG00000000562	Prf1	K07818	NA	perforin 1 [Source:RGD Symbol;Acc:708463]	11.7317	8.28855	6.91728	21.9426	12.0857	30.3654	0.418325	-1.2573	down
ko05320	Autoimmune thyroid disease	0.0139526	ENSRNOG00000002978	Faslg	K04389	NA	Fas ligand [Source:RGD Symbol;Acc:3880]	0.709471	0.473535	1.27202	2.10948	1.83509	3.11962	0.347531	-1.52479	down
ko05320	Autoimmune thyroid disease	0.0139526	ENSRNOG00000045973	Gzmb	K01353	EC:3.4.21.79	granzyme B [Source:RGD Symbol;Acc:620018]	2.25316	1.81994	1.79573	5.58483	4.29643	10.1425	0.293093	-1.77057	down
ko05320	Autoimmune thyroid disease	0.0139526	ENSRNOG00000049976	Gzmbl2	K01353	EC:3.4.21.79	Granzyme B-like 2 [Source:RGD Symbol;Acc:2320097]	1.20768	0.713789	0.784046	3.07314	1.12515	4.83558	0.299486	-1.73944	down
ko04620	Toll-like receptor signaling pathway	0.0151962	ENSRNOG00000010906	Ccl5	K12499	NA	C-C motif chemokine ligand 5 [Source:RGD Symbol;Acc:69069]	48.3284	41.7605	33.5398	89.039	63.5136	135.101	0.429784	-1.21832	down
ko04620	Toll-like receptor signaling pathway	0.0151962	ENSRNOG00000017414	Irf7	K09447	NA	interferon regulatory factor 7 [Source:RGD Symbol;Acc:1307828]	50.0909	39.3499	31.835	103.562	77.9961	166.957	0.347979	-1.52293	down
ko04620	Toll-like receptor signaling pathway	0.0151962	ENSRNOG00000021155	Ctsk	NA	NA	cathepsin K [Source:RGD Symbol;Acc:61810]	8.68873	18.433	39.2286	5.53409	8.14942	6.72412	3.25125	1.70099	up
ko04620	Toll-like receptor signaling pathway	0.0151962	ENSRNOG00000022067	Tlr5	K10168	NA	toll-like receptor 5 [Source:RGD Symbol;Acc:631351]	3.79088	2.48157	3.94515	1.49858	1.60221	1.77419	2.09592	1.06759	up
ko04620	Toll-like receptor signaling pathway	0.0151962	ENSRNOG00000043451	Spp1	K06250	NA	secreted phosphoprotein 1 [Source:RGD Symbol;Acc:3752]	5.06055	8.53045	47.2968	2.53233	1.09522	0.50064	14.7493	3.88257	up
ko04973	Carbohydrate digestion and absorption	0.0223238	ENSRNOG00000005268	Gnat3	K19729	NA	G protein subunit alpha transducin 3 [Source:RGD Symbol;Acc:727817]	1.25921	0.481596	0.306878	3.70113	2.49755	4.15072	0.197855	-2.33748	down
ko04973	Carbohydrate digestion and absorption	0.0223238	ENSRNOG00000017775	Slc5a1	K14158	NA	solute carrier family 5 member 1 [Source:RGD Symbol;Acc:3713]	5.02389	3.24643	3.5349	9.53507	10.2527	6.94576	0.441589	-1.17922	down
ko04973	Carbohydrate digestion and absorption	0.0223238	ENSRNOG00000026235	Hk3	K00844	EC:2.7.1.1	hexokinase 3 [Source:RGD Symbol;Acc:2798]	4.56077	6.16295	7.19107	3.31099	2.99085	2.64764	2.00177	1.00128	up
ko05162	Measles	0.0225571	ENSRNOG00000001369	Oas1a	K14216	EC:2.7.7.84	2'-5' oligoadenylate synthetase 1A [Source:RGD Symbol;Acc:621760]	10.8024	8.5894	7.75613	18.5757	13.2011	25.5218	0.473796	-1.07766	down
ko05162	Measles	0.0225571	ENSRNOG00000001963	Mx2	K14754	NA	MX dynamin like GTPase 2 [Source:RGD Symbol;Acc:628821]	30.1994	23.4836	17.5537	60.3679	35.706	65.2539	0.441565	-1.1793	down
ko05162	Measles	0.0225571	ENSRNOG00000002978	Faslg	K04389	NA	Fas ligand [Source:RGD Symbol;Acc:3880]	0.709471	0.473535	1.27202	2.10948	1.83509	3.11962	0.347531	-1.52479	down
ko05162	Measles	0.0225571	ENSRNOG00000017414	Irf7	K09447	NA	interferon regulatory factor 7 [Source:RGD Symbol;Acc:1307828]	50.0909	39.3499	31.835	103.562	77.9961	166.957	0.347979	-1.52293	down
ko05162	Measles	0.0225571	ENSRNOG00000033220	Oas1f	K14216	EC:2.7.7.84	2 ' -5 ' oligoadenylate synthetase 1K [Source:RGD Symbol;Acc:1359279]	5.23307	3.89105	3.42366	9.0953	7.36568	11.0517	0.456073	-1.13266	down
ko05162	Measles	0.0225571	ENSRNOG00000049282	Oas2	K14216	EC:2.7.7.84	2'-5' oligoadenylate synthetase 2 [Source:RGD Symbol;Acc:1359697]	5.96024	3.32075	3.13407	12.3504	5.63243	14.1955	0.385821	-1.374	down
ko04742	Taste transduction	0.0239113	ENSRNOG00000005268	Gnat3	K19729	NA	G protein subunit alpha transducin 3 [Source:RGD Symbol;Acc:727817]	1.25921	0.481596	0.306878	3.70113	2.49755	4.15072	0.197855	-2.33748	down
ko04742	Taste transduction	0.0239113	ENSRNOG00000006639	Scn9a	K04841	NA	sodium voltage-gated channel alpha subunit 9 [Source:RGD Symbol;Acc:69368]	0.00415055	0.00708024	0.083853	0	0	0	316.946	8.30809	up
ko04742	Taste transduction	0.0239113	ENSRNOG00000020484	Trpm5	K04980	NA	transient receptor potential cation channel, subfamily M, member 5 [Source:RGD Symbol;Acc:1310620]	7.2614	1.93473	3.55776	17.4263	11.9153	18.1559	0.268517	-1.89691	down
ko04742	Taste transduction	0.0239113	ENSRNOG00000054212	Pde1a	K13755	EC:3.1.4.17	phosphodiesterase 1A [Source:RGD Symbol;Acc:68329]	1.57085	2.96311	2.99337	1.33966	1.12177	1.16821	2.07385	1.05231	up
ko00450	Selenocompound metabolism	0.0380724	ENSRNOG00000057089	LOC103691744	K01758	EC:4.4.1.1	cystathionine gamma-lyase [Source:RGD Symbol;Acc:9153842]	0.96608	0.707464	0.598809	2.81821	1.97099	2.30047	0.320516	-1.64153	down
ko00450	Selenocompound metabolism	0.0380724	ENSRNOG00000059810	Txnrd3	K22182	EC:1.8.1.9	thioredoxin reductase 3 [Source:RGD Symbol;Acc:1308363]	7.41397	9.68591	10.2151	4.19814	4.65935	4.21054	2.09021	1.06365	up
ko00220	Arginine biosynthesis	0.0380724	ENSRNOG00000013304	Arg1	K01476	EC:3.5.3.1	arginase 1 [Source:RGD Symbol;Acc:2150]	8.35733	12.4054	14.4375	5.09255	6.15658	5.0671	2.15737	1.10928	up
ko00220	Arginine biosynthesis	0.0380724	ENSRNOG00000013704	Cps1	K01948	EC:6.3.4.16	carbamoyl-phosphate synthase 1 [Source:RGD Symbol;Acc:2395]	0.0296366	0.0318274	0.0321218	0	0	0	311.953	8.28518	up
ko04514	Cell adhesion molecules (CAMs)	0.0406562	ENSRNOG00000021243	Siglec1	K06548	NA	sialic acid binding Ig like lectin 1 [Source:RGD Symbol;Acc:1311953]	4.52656	3.09607	5.36833	2.4411	1.26921	2.20243	2.19711	1.13561	up
ko04514	Cell adhesion molecules (CAMs)	0.0406562	ENSRNOG00000029212	Vcan	K06793	NA	versican [Source:RGD Symbol;Acc:619940]	2.24955	4.3322	4.42122	1.48965	1.11479	1.8692	2.45951	1.29837	up
ko04514	Cell adhesion molecules (CAMs)	0.0406562	ENSRNOG00000030515	Nfasc	K06757	NA	neurofascin [Source:RGD Symbol;Acc:620911]	0.0215103	0.0189856	0.293672	0.00693821	0.00924876	0	20.6443	4.36767	up
ko04514	Cell adhesion molecules (CAMs)	0.0406562	ENSRNOG00000036711	Spn	K06477	NA	sialophorin [Source:RGD Symbol;Acc:3750]	6.88598	6.45845	6.84351	11.3828	12.0279	22.4867	0.439849	-1.18492	down
ko04514	Cell adhesion molecules (CAMs)	0.0406562	ENSRNOG00000038197	Cd226	K06567	NA	CD226 molecule [Source:RGD Symbol;Acc:1311513]	0.859597	0.545065	0.951736	1.53046	1.35368	1.85631	0.497084	-1.00844	down
ko04514	Cell adhesion molecules (CAMs)	0.0406562	ENSRNOG00000050220	Nrxn1	K07377	NA	neurexin 1 [Source:RGD Symbol;Acc:628659]	0.558072	0.451492	0.290124	1.63738	1.09146	0.868123	0.36133	-1.46861	down
ko04621	NOD-like receptor signaling pathway	0.0462996	ENSRNOG00000001369	Oas1a	K14216	EC:2.7.7.84	2'-5' oligoadenylate synthetase 1A [Source:RGD Symbol;Acc:621760]	10.8024	8.5894	7.75613	18.5757	13.2011	25.5218	0.473796	-1.07766	down
ko04621	NOD-like receptor signaling pathway	0.0462996	ENSRNOG00000010906	Ccl5	K12499	NA	C-C motif chemokine ligand 5 [Source:RGD Symbol;Acc:69069]	48.3284	41.7605	33.5398	89.039	63.5136	135.101	0.429784	-1.21832	down
ko04621	NOD-like receptor signaling pathway	0.0462996	ENSRNOG00000017414	Irf7	K09447	NA	interferon regulatory factor 7 [Source:RGD Symbol;Acc:1307828]	50.0909	39.3499	31.835	103.562	77.9961	166.957	0.347979	-1.52293	down
ko04621	NOD-like receptor signaling pathway	0.0462996	ENSRNOG00000021201	Txnip	K20910	NA	thioredoxin interacting protein [Source:RGD Symbol;Acc:620886]	381.684	279.835	482.899	706.409	874.051	787.516	0.483289	-1.04904	down
ko04621	NOD-like receptor signaling pathway	0.0462996	ENSRNOG00000033220	Oas1f	K14216	EC:2.7.7.84	2 ' -5 ' oligoadenylate synthetase 1K [Source:RGD Symbol;Acc:1359279]	5.23307	3.89105	3.42366	9.0953	7.36568	11.0517	0.456073	-1.13266	down
ko04621	NOD-like receptor signaling pathway	0.0462996	ENSRNOG00000049282	Oas2	K14216	EC:2.7.7.84	2'-5' oligoadenylate synthetase 2 [Source:RGD Symbol;Acc:1359697]	5.96024	3.32075	3.13407	12.3504	5.63243	14.1955	0.385821	-1.374	down
ko00524	Neomycin, kanamycin and gentamicin biosynthesis	0.064062	ENSRNOG00000026235	Hk3	K00844	EC:2.7.1.1	hexokinase 3 [Source:RGD Symbol;Acc:2798]	4.56077	6.16295	7.19107	3.31099	2.99085	2.64764	2.00177	1.00128	up
ko04657	IL-17 signaling pathway	0.064095	ENSRNOG00000011483	S100a9	K21128	NA	S100 calcium binding protein A9 [Source:RGD Symbol;Acc:620267]	20.221	25.7548	22.6237	43.4388	35.8205	91.6187	0.401453	-1.3167	down
ko04657	IL-17 signaling pathway	0.064095	ENSRNOG00000011557	S100a8	K21127	NA	S100 calcium binding protein A8 [Source:RGD Symbol;Acc:620265]	6.86219	14.8878	7.83776	25.2298	19.4616	46.9158	0.322986	-1.63046	down
ko04657	IL-17 signaling pathway	0.064095	ENSRNOG00000013973	Lcn2	K21129	NA	lipocalin 2 [Source:RGD Symbol;Acc:69408]	399.193	738.611	424.407	107.199	115.007	143.758	4.26876	2.09382	up
ko04657	IL-17 signaling pathway	0.064095	ENSRNOG00000016804	Il25	K05493	NA	interleukin 25 [Source:RGD Symbol;Acc:1561632]	0.051869	0.094698	0.050163	0.853721	0.318759	0.438559	0.122114	-3.0337	down
ko05146	Amoebiasis	0.0704036	ENSRNOG00000003897	Col1a1	NA	NA	collagen type I alpha 1 chain [Source:RGD Symbol;Acc:61817]	126.27	249.911	273.591	58.1167	63.4283	51.677	3.75109	1.90731	up
ko05146	Amoebiasis	0.0704036	ENSRNOG00000011292	NEWGENE_621351	K06236	NA	collagen, type I, alpha 2 [Source:RGD Symbol;Acc:9452897]	134.308	280.185	220.805	65.4149	127.389	75.4797	2.36801	1.24368	up
ko05146	Amoebiasis	0.0704036	ENSRNOG00000013304	Arg1	K01476	EC:3.5.3.1	arginase 1 [Source:RGD Symbol;Acc:2150]	8.35733	12.4054	14.4375	5.09255	6.15658	5.0671	2.15737	1.10928	up
ko05146	Amoebiasis	0.0704036	ENSRNOG00000052925	NEWGENE_621351	K06236	NA	collagen, type I, alpha 2 [Source:RGD Symbol;Acc:9452897]	44.2462	78.2478	94.465	34.5066	31.6576	31.9137	2.21211	1.14542	up
ko04972	Pancreatic secretion	0.0792933	ENSRNOG00000010935	Cpb2	K01300	EC:3.4.17.20	carboxypeptidase B2 [Source:RGD Symbol;Acc:71035]	0.417813	0.940398	0.194739	0	0	0	5176.5	12.3378	up
ko04972	Pancreatic secretion	0.0792933	ENSRNOG00000016945	Pla2g2a	NA	NA	phospholipase A2 group IIA [Source:RGD Symbol;Acc:620857]	31.8882	19.843	49.1573	12.1527	19.2349	10.06	2.43412	1.2834	up
ko04972	Pancreatic secretion	0.0792933	ENSRNOG00000017060	Ryr2	K04962	NA	ryanodine receptor 2 [Source:RGD Symbol;Acc:620314]	0.285075	0.300051	1.47817	0.173643	0.049516	0.188027	5.01792	2.32709	up
ko04972	Pancreatic secretion	0.0792933	ENSRNOG00000017873	Sct	K05263	NA	secretin [Source:RGD Symbol;Acc:3643]	1.23791	1.93048	2.4561	0.102153	0.550348	0.362674	5.54041	2.46999	up
ko05020	Prion diseases	0.101508	ENSRNOG00000010906	Ccl5	K12499	NA	C-C motif chemokine ligand 5 [Source:RGD Symbol;Acc:69069]	48.3284	41.7605	33.5398	89.039	63.5136	135.101	0.429784	-1.21832	down
ko05020	Prion diseases	0.101508	ENSRNOG00000024115	C6	K03995	NA	complement C6 [Source:RGD Symbol;Acc:2238]	3.17798	27.2636	27.2519	1.49621	1.42027	3.4023	9.13047	3.19069	up
ko04976	Bile secretion	0.103814	ENSRNOG00000017775	Slc5a1	K14158	NA	solute carrier family 5 member 1 [Source:RGD Symbol;Acc:3713]	5.02389	3.24643	3.5349	9.53507	10.2527	6.94576	0.441589	-1.17922	down
ko04976	Bile secretion	0.103814	ENSRNOG00000017873	Sct	K05263	NA	secretin [Source:RGD Symbol;Acc:3643]	1.23791	1.93048	2.4561	0.102153	0.550348	0.362674	5.54041	2.46999	up
ko04976	Bile secretion	0.103814	ENSRNOG00000031249	Slco1a2	K03460	NA	solute carrier organic anion transporter family, member 1A2 [Source:RGD Symbol;Acc:70985]	8.01298	7.7205	7.23905	17.1036	14.73	19.8891	0.444148	-1.17089	down
ko00591	Linoleic acid metabolism	0.106739	ENSRNOG00000012458	Cyp2e1	K07415	EC:1.14.13.-	cytochrome P450, family 2, subfamily e, polypeptide 1 [Source:RGD Symbol;Acc:2475]	5.70974	4.74285	4.83838	17.7295	21.6301	20.9411	0.253579	-1.97949	down
ko00591	Linoleic acid metabolism	0.106739	ENSRNOG00000016945	Pla2g2a	NA	NA	phospholipase A2 group IIA [Source:RGD Symbol;Acc:620857]	31.8882	19.843	49.1573	12.1527	19.2349	10.06	2.43412	1.2834	up
ko05143	African trypanosomiasis	0.128338	ENSRNOG00000002978	Faslg	K04389	NA	Fas ligand [Source:RGD Symbol;Acc:3880]	0.709471	0.473535	1.27202	2.10948	1.83509	3.11962	0.347531	-1.52479	down
ko05143	African trypanosomiasis	0.128338	ENSRNOG00000008176	Nppa	K12334	NA	natriuretic peptide A [Source:RGD Symbol;Acc:3193]	0	0	4.77912	0	0	0	15930.4	13.9595	up
ko04216	Ferroptosis	0.139494	ENSRNOG00000014117	Hmox1	K00510	EC:1.14.14.18	heme oxygenase 1 [Source:RGD Symbol;Acc:2806]	31.9406	70.2869	56.3487	14.3785	22.3463	16.8387	2.96053	1.56586	up
ko04216	Ferroptosis	0.139494	ENSRNOG00000031506	Ftl1	K13625	NA	ferritin light chain 1 [Source:RGD Symbol;Acc:61813]	52.0288	52.2376	40.6289	19.4586	27.1585	22.9462	2.08293	1.05861	up
ko04611	Platelet activation	0.155381	ENSRNOG00000003897	Col1a1	NA	NA	collagen type I alpha 1 chain [Source:RGD Symbol;Acc:61817]	126.27	249.911	273.591	58.1167	63.4283	51.677	3.75109	1.90731	up
ko04611	Platelet activation	0.155381	ENSRNOG00000011292	NEWGENE_621351	K06236	NA	collagen, type I, alpha 2 [Source:RGD Symbol;Acc:9452897]	134.308	280.185	220.805	65.4149	127.389	75.4797	2.36801	1.24368	up
ko04611	Platelet activation	0.155381	ENSRNOG00000017606	P2rx1	K05215	NA	purinergic receptor P2X 1 [Source:RGD Symbol;Acc:3240]	7.18568	9.04786	9.01957	19.2409	13.9678	19.8251	0.476169	-1.07045	down
ko04611	Platelet activation	0.155381	ENSRNOG00000052925	NEWGENE_621351	K06236	NA	collagen, type I, alpha 2 [Source:RGD Symbol;Acc:9452897]	44.2462	78.2478	94.465	34.5066	31.6576	31.9137	2.21211	1.14542	up
ko04062	Chemokine signaling pathway	0.167935	ENSRNOG00000010906	Ccl5	K12499	NA	C-C motif chemokine ligand 5 [Source:RGD Symbol;Acc:69069]	48.3284	41.7605	33.5398	89.039	63.5136	135.101	0.429784	-1.21832	down
ko04062	Chemokine signaling pathway	0.167935	ENSRNOG00000028548	Ccl9	K22671	NA	chemokine (C-C motif) ligand 9 [Source:RGD Symbol;Acc:1310563]	31.354	22.2453	32.1143	12.7972	13.0843	8.17364	2.5169	1.33165	up
ko04062	Chemokine signaling pathway	0.167935	ENSRNOG00000031162	Ccl24	K21097	NA	C-C motif chemokine ligand 24 [Source:RGD Symbol;Acc:1310245]	2.95267	4.5172	2.6358	1.47836	0.899061	1.85835	2.38579	1.25447	up
ko04062	Chemokine signaling pathway	0.167935	ENSRNOG00000034290	Ccl21	K16062	NA	C-C motif chemokine ligand 21 [Source:RGD Symbol;Acc:1311996]	71.933	100.476	149.957	63.5991	39.5568	57.0998	2.01157	1.00832	up
ko04062	Chemokine signaling pathway	0.167935	ENSRNOG00000048239	Cxcr1	K04175	NA	C-X-C motif chemokine receptor 1 [Source:RGD Symbol;Acc:2905]	12.0581	12.2964	6.19431	5.02716	3.39089	4.10572	2.43926	1.28645	up
ko05165	Human papillomavirus infection	0.186191	ENSRNOG00000001963	Mx2	K14754	NA	MX dynamin like GTPase 2 [Source:RGD Symbol;Acc:628821]	30.1994	23.4836	17.5537	60.3679	35.706	65.2539	0.441565	-1.1793	down
ko05165	Human papillomavirus infection	0.186191	ENSRNOG00000002978	Faslg	K04389	NA	Fas ligand [Source:RGD Symbol;Acc:3880]	0.709471	0.473535	1.27202	2.10948	1.83509	3.11962	0.347531	-1.52479	down
ko05165	Human papillomavirus infection	0.186191	ENSRNOG00000003897	Col1a1	NA	NA	collagen type I alpha 1 chain [Source:RGD Symbol;Acc:61817]	126.27	249.911	273.591	58.1167	63.4283	51.677	3.75109	1.90731	up
ko05165	Human papillomavirus infection	0.186191	ENSRNOG00000010529	Thbs2	K04659	NA	thrombospondin 2 [Source:RGD Symbol;Acc:1310979]	2.57939	6.01878	6.82916	1.12399	1.12034	1.18604	4.49727	2.16905	up
ko05165	Human papillomavirus infection	0.186191	ENSRNOG00000011292	NEWGENE_621351	K06236	NA	collagen, type I, alpha 2 [Source:RGD Symbol;Acc:9452897]	134.308	280.185	220.805	65.4149	127.389	75.4797	2.36801	1.24368	up
ko05165	Human papillomavirus infection	0.186191	ENSRNOG00000022635	Dlg2	K12075	NA	discs large MAGUK scaffold protein 2 [Source:RGD Symbol;Acc:619895]	0.884341	1.52643	2.40362	0.647262	0.40045	0.624041	2.87985	1.52599	up
ko05165	Human papillomavirus infection	0.186191	ENSRNOG00000043451	Spp1	K06250	NA	secreted phosphoprotein 1 [Source:RGD Symbol;Acc:3752]	5.06055	8.53045	47.2968	2.53233	1.09522	0.50064	14.7493	3.88257	up
ko05165	Human papillomavirus infection	0.186191	ENSRNOG00000052925	NEWGENE_621351	K06236	NA	collagen, type I, alpha 2 [Source:RGD Symbol;Acc:9452897]	44.2462	78.2478	94.465	34.5066	31.6576	31.9137	2.21211	1.14542	up
ko04623	Cytosolic DNA-sensing pathway	0.197827	ENSRNOG00000010906	Ccl5	K12499	NA	C-C motif chemokine ligand 5 [Source:RGD Symbol;Acc:69069]	48.3284	41.7605	33.5398	89.039	63.5136	135.101	0.429784	-1.21832	down
ko04623	Cytosolic DNA-sensing pathway	0.197827	ENSRNOG00000017414	Irf7	K09447	NA	interferon regulatory factor 7 [Source:RGD Symbol;Acc:1307828]	50.0909	39.3499	31.835	103.562	77.9961	166.957	0.347979	-1.52293	down
ko00330	Arginine and proline metabolism	0.197827	ENSRNOG00000008575	Aoc1	K11182	EC:1.4.3.22	amine oxidase, copper containing 1 [Source:RGD Symbol;Acc:61296]	10.5118	32.5356	9.68949	2.66527	3.95753	3.97902	4.97433	2.3145	up
ko00330	Arginine and proline metabolism	0.197827	ENSRNOG00000013304	Arg1	K01476	EC:3.5.3.1	arginase 1 [Source:RGD Symbol;Acc:2150]	8.35733	12.4054	14.4375	5.09255	6.15658	5.0671	2.15737	1.10928	up
ko04080	Neuroactive ligand-receptor interaction	0.221983	ENSRNOG00000010603	Gzma	K01352	EC:3.4.21.78	granzyme A [Source:RGD Symbol;Acc:628640]	8.31047	7.27624	8.60605	18.3746	12.8989	25.6912	0.424698	-1.23549	down
ko04080	Neuroactive ligand-receptor interaction	0.221983	ENSRNOG00000011824	Trh	K05253	NA	thyrotropin releasing hormone [Source:RGD Symbol;Acc:3903]	0.198757	0.928469	2.94448	0	0.220139	0.033459	16.0558	4.00502	up
ko04080	Neuroactive ligand-receptor interaction	0.221983	ENSRNOG00000017606	P2rx1	K05215	NA	purinergic receptor P2X 1 [Source:RGD Symbol;Acc:3240]	7.18568	9.04786	9.01957	19.2409	13.9678	19.8251	0.476169	-1.07045	down
ko04080	Neuroactive ligand-receptor interaction	0.221983	ENSRNOG00000017873	Sct	K05263	NA	secretin [Source:RGD Symbol;Acc:3643]	1.23791	1.93048	2.4561	0.102153	0.550348	0.362674	5.54041	2.46999	up
ko04080	Neuroactive ligand-receptor interaction	0.221983	ENSRNOG00000020901	S1pr5	K04295	NA	sphingosine-1-phosphate receptor 5 [Source:RGD Symbol;Acc:620566]	1.96026	1.50384	1.86566	3.51863	3.70608	6.33429	0.393078	-1.34711	down
ko04080	Neuroactive ligand-receptor interaction	0.221983	ENSRNOG00000036685	Npb	K05267	NA	neuropeptide B [Source:RGD Symbol;Acc:708513]	4.7747	3.3954	4.53054	0.833322	1.38046	0.961871	3.99938	1.99978	up
ko04080	Neuroactive ligand-receptor interaction	0.221983	ENSRNOG00000048145	Sstr1	K04217	NA	somatostatin receptor 1 [Source:RGD Symbol;Acc:3762]	0.23218	0.180356	0.12633	0.504885	0.640927	0.601976	0.308313	-1.69753	down
ko04066	HIF-1 signaling pathway	0.225849	ENSRNOG00000008176	Nppa	K12334	NA	natriuretic peptide A [Source:RGD Symbol;Acc:3193]	0	0	4.77912	0	0	0	15930.4	13.9595	up
ko04066	HIF-1 signaling pathway	0.225849	ENSRNOG00000014117	Hmox1	K00510	EC:1.14.14.18	heme oxygenase 1 [Source:RGD Symbol;Acc:2806]	31.9406	70.2869	56.3487	14.3785	22.3463	16.8387	2.96053	1.56586	up
ko04066	HIF-1 signaling pathway	0.225849	ENSRNOG00000026235	Hk3	K00844	EC:2.7.1.1	hexokinase 3 [Source:RGD Symbol;Acc:2798]	4.56077	6.16295	7.19107	3.31099	2.99085	2.64764	2.00177	1.00128	up
ko04510	Focal adhesion	0.228162	ENSRNOG00000003897	Col1a1	NA	NA	collagen type I alpha 1 chain [Source:RGD Symbol;Acc:61817]	126.27	249.911	273.591	58.1167	63.4283	51.677	3.75109	1.90731	up
ko04510	Focal adhesion	0.228162	ENSRNOG00000010529	Thbs2	K04659	NA	thrombospondin 2 [Source:RGD Symbol;Acc:1310979]	2.57939	6.01878	6.82916	1.12399	1.12034	1.18604	4.49727	2.16905	up
ko04510	Focal adhesion	0.228162	ENSRNOG00000011292	NEWGENE_621351	K06236	NA	collagen, type I, alpha 2 [Source:RGD Symbol;Acc:9452897]	134.308	280.185	220.805	65.4149	127.389	75.4797	2.36801	1.24368	up
ko04510	Focal adhesion	0.228162	ENSRNOG00000043451	Spp1	K06250	NA	secreted phosphoprotein 1 [Source:RGD Symbol;Acc:3752]	5.06055	8.53045	47.2968	2.53233	1.09522	0.50064	14.7493	3.88257	up
ko04510	Focal adhesion	0.228162	ENSRNOG00000052925	NEWGENE_621351	K06236	NA	collagen, type I, alpha 2 [Source:RGD Symbol;Acc:9452897]	44.2462	78.2478	94.465	34.5066	31.6576	31.9137	2.21211	1.14542	up
ko04024	cAMP signaling pathway	0.231182	ENSRNOG00000008176	Nppa	K12334	NA	natriuretic peptide A [Source:RGD Symbol;Acc:3193]	0	0	4.77912	0	0	0	15930.4	13.9595	up
ko04024	cAMP signaling pathway	0.231182	ENSRNOG00000017060	Ryr2	K04962	NA	ryanodine receptor 2 [Source:RGD Symbol;Acc:620314]	0.285075	0.300051	1.47817	0.173643	0.049516	0.188027	5.01792	2.32709	up
ko04024	cAMP signaling pathway	0.231182	ENSRNOG00000025120	Gli1	K16797	NA	GLI family zinc finger 1 [Source:RGD Symbol;Acc:621673]	3.07771	4.09095	3.67171	1.56395	1.68971	1.52278	2.26955	1.18241	up
ko04024	cAMP signaling pathway	0.231182	ENSRNOG00000028404	Ppp1r1b	K15494	NA	protein phosphatase 1, regulatory (inhibitor) subunit 1B [Source:RGD Symbol;Acc:621859]	22.4231	7.67647	15.2862	32.2533	35.5582	36.4644	0.435248	-1.20009	down
ko04024	cAMP signaling pathway	0.231182	ENSRNOG00000048145	Sstr1	K04217	NA	somatostatin receptor 1 [Source:RGD Symbol;Acc:3762]	0.23218	0.180356	0.12633	0.504885	0.640927	0.601976	0.308313	-1.69753	down
ko00910	Nitrogen metabolism	0.232832	ENSRNOG00000013704	Cps1	K01948	EC:6.3.4.16	carbamoyl-phosphate synthase 1 [Source:RGD Symbol;Acc:2395]	0.0296366	0.0318274	0.0321218	0	0	0	311.953	8.28518	up
ko05142	Chagas disease (American trypanosomiasis)	0.234553	ENSRNOG00000002978	Faslg	K04389	NA	Fas ligand [Source:RGD Symbol;Acc:3880]	0.709471	0.473535	1.27202	2.10948	1.83509	3.11962	0.347531	-1.52479	down
ko05142	Chagas disease (American trypanosomiasis)	0.234553	ENSRNOG00000003298	Cd247	K06453	NA	Cd247 molecule [Source:RGD Symbol;Acc:2305]	3.42781	2.27339	3.39083	5.96858	4.58895	7.66207	0.499025	-1.00282	down
ko05142	Chagas disease (American trypanosomiasis)	0.234553	ENSRNOG00000010906	Ccl5	K12499	NA	C-C motif chemokine ligand 5 [Source:RGD Symbol;Acc:69069]	48.3284	41.7605	33.5398	89.039	63.5136	135.101	0.429784	-1.21832	down
ko04933	AGE-RAGE signaling pathway in diabetic complications	0.234553	ENSRNOG00000003897	Col1a1	NA	NA	collagen type I alpha 1 chain [Source:RGD Symbol;Acc:61817]	126.27	249.911	273.591	58.1167	63.4283	51.677	3.75109	1.90731	up
ko04933	AGE-RAGE signaling pathway in diabetic complications	0.234553	ENSRNOG00000011292	NEWGENE_621351	K06236	NA	collagen, type I, alpha 2 [Source:RGD Symbol;Acc:9452897]	134.308	280.185	220.805	65.4149	127.389	75.4797	2.36801	1.24368	up
ko04933	AGE-RAGE signaling pathway in diabetic complications	0.234553	ENSRNOG00000052925	NEWGENE_621351	K06236	NA	collagen, type I, alpha 2 [Source:RGD Symbol;Acc:9452897]	44.2462	78.2478	94.465	34.5066	31.6576	31.9137	2.21211	1.14542	up
ko05321	Inflammatory bowel disease (IBD)	0.252399	ENSRNOG00000022067	Tlr5	K10168	NA	toll-like receptor 5 [Source:RGD Symbol;Acc:631351]	3.79088	2.48157	3.94515	1.49858	1.60221	1.77419	2.09592	1.06759	up
ko05321	Inflammatory bowel disease (IBD)	0.252399	ENSRNOG00000054218	Il18rap	K05174	NA	interleukin 18 receptor accessory protein [Source:RGD Symbol;Acc:727867]	0.952382	0.874742	0.928804	2.62494	1.36523	2.00221	0.459906	-1.12059	down
ko05169	Epstein-Barr virus infection	0.268272	ENSRNOG00000001369	Oas1a	K14216	EC:2.7.7.84	2'-5' oligoadenylate synthetase 1A [Source:RGD Symbol;Acc:621760]	10.8024	8.5894	7.75613	18.5757	13.2011	25.5218	0.473796	-1.07766	down
ko05169	Epstein-Barr virus infection	0.268272	ENSRNOG00000003298	Cd247	K06453	NA	Cd247 molecule [Source:RGD Symbol;Acc:2305]	3.42781	2.27339	3.39083	5.96858	4.58895	7.66207	0.499025	-1.00282	down
ko05169	Epstein-Barr virus infection	0.268272	ENSRNOG00000017414	Irf7	K09447	NA	interferon regulatory factor 7 [Source:RGD Symbol;Acc:1307828]	50.0909	39.3499	31.835	103.562	77.9961	166.957	0.347979	-1.52293	down
ko05169	Epstein-Barr virus infection	0.268272	ENSRNOG00000033220	Oas1f	K14216	EC:2.7.7.84	2 ' -5 ' oligoadenylate synthetase 1K [Source:RGD Symbol;Acc:1359279]	5.23307	3.89105	3.42366	9.0953	7.36568	11.0517	0.456073	-1.13266	down
ko05169	Epstein-Barr virus infection	0.268272	ENSRNOG00000049282	Oas2	K14216	EC:2.7.7.84	2'-5' oligoadenylate synthetase 2 [Source:RGD Symbol;Acc:1359697]	5.96024	3.32075	3.13407	12.3504	5.63243	14.1955	0.385821	-1.374	down
ko05168	Herpes simplex virus 1 infection	0.27692	ENSRNOG00000001369	Oas1a	K14216	EC:2.7.7.84	2'-5' oligoadenylate synthetase 1A [Source:RGD Symbol;Acc:621760]	10.8024	8.5894	7.75613	18.5757	13.2011	25.5218	0.473796	-1.07766	down
ko05168	Herpes simplex virus 1 infection	0.27692	ENSRNOG00000002978	Faslg	K04389	NA	Fas ligand [Source:RGD Symbol;Acc:3880]	0.709471	0.473535	1.27202	2.10948	1.83509	3.11962	0.347531	-1.52479	down
ko05168	Herpes simplex virus 1 infection	0.27692	ENSRNOG00000009118	Pou2f3	K09364	NA	POU class 2 homeobox 3 [Source:RGD Symbol;Acc:621691]	0.80936	0.183727	0.257766	2.15107	1.10798	1.91974	0.241534	-2.0497	down
ko05168	Herpes simplex virus 1 infection	0.27692	ENSRNOG00000010906	Ccl5	K12499	NA	C-C motif chemokine ligand 5 [Source:RGD Symbol;Acc:69069]	48.3284	41.7605	33.5398	89.039	63.5136	135.101	0.429784	-1.21832	down
ko05168	Herpes simplex virus 1 infection	0.27692	ENSRNOG00000017414	Irf7	K09447	NA	interferon regulatory factor 7 [Source:RGD Symbol;Acc:1307828]	50.0909	39.3499	31.835	103.562	77.9961	166.957	0.347979	-1.52293	down
ko05168	Herpes simplex virus 1 infection	0.27692	ENSRNOG00000033220	Oas1f	K14216	EC:2.7.7.84	2 ' -5 ' oligoadenylate synthetase 1K [Source:RGD Symbol;Acc:1359279]	5.23307	3.89105	3.42366	9.0953	7.36568	11.0517	0.456073	-1.13266	down
ko05168	Herpes simplex virus 1 infection	0.27692	ENSRNOG00000049282	Oas2	K14216	EC:2.7.7.84	2'-5' oligoadenylate synthetase 2 [Source:RGD Symbol;Acc:1359697]	5.96024	3.32075	3.13407	12.3504	5.63243	14.1955	0.385821	-1.374	down
ko00340	Histidine metabolism	0.305524	ENSRNOG00000008575	Aoc1	K11182	EC:1.4.3.22	amine oxidase, copper containing 1 [Source:RGD Symbol;Acc:61296]	10.5118	32.5356	9.68949	2.66527	3.95753	3.97902	4.97433	2.3145	up
ko04142	Lysosome	0.310342	ENSRNOG00000020206	Ctsd	K01379	EC:3.4.23.5	cathepsin D [Source:RGD Symbol;Acc:621511]	548	744.981	848.372	316.023	357.412	293.272	2.2151	1.14737	up
ko04142	Lysosome	0.310342	ENSRNOG00000021155	Ctsk	NA	NA	cathepsin K [Source:RGD Symbol;Acc:61810]	8.68873	18.433	39.2286	5.53409	8.14942	6.72412	3.25125	1.70099	up
ko04142	Lysosome	0.310342	ENSRNOG00000037563	Cd68	K06501	NA	Cd68 molecule [Source:RGD Symbol;Acc:1305970]	75.5859	71.5358	91.732	32.3381	37.7388	35.3836	2.26486	1.17942	up
ko00592	alpha-Linolenic acid metabolism	0.316957	ENSRNOG00000016945	Pla2g2a	NA	NA	phospholipase A2 group IIA [Source:RGD Symbol;Acc:620857]	31.8882	19.843	49.1573	12.1527	19.2349	10.06	2.43412	1.2834	up
ko04918	Thyroid hormone synthesis	0.319486	ENSRNOG00000026203	Pax8	K09293	NA	paired box 8 [Source:RGD Symbol;Acc:620434]	0.679274	0.646556	1.36295	0.21796	0.383172	0.130189	3.6766	1.87837	up
ko04918	Thyroid hormone synthesis	0.319486	ENSRNOG00000058692	Slc26a4	NA	NA	solute carrier family 26 member 4 [Source:RGD Symbol;Acc:3293]	4.03381	8.98354	10.6969	1.03707	0.715431	0.934049	8.82701	3.14192	up
ko00590	Arachidonic acid metabolism	0.319486	ENSRNOG00000012458	Cyp2e1	K07415	EC:1.14.13.-	cytochrome P450, family 2, subfamily e, polypeptide 1 [Source:RGD Symbol;Acc:2475]	5.70974	4.74285	4.83838	17.7295	21.6301	20.9411	0.253579	-1.97949	down
ko00590	Arachidonic acid metabolism	0.319486	ENSRNOG00000016945	Pla2g2a	NA	NA	phospholipase A2 group IIA [Source:RGD Symbol;Acc:620857]	31.8882	19.843	49.1573	12.1527	19.2349	10.06	2.43412	1.2834	up
ko04071	Sphingolipid signaling pathway	0.32389	ENSRNOG00000007637	Acer2	K01441	EC:3.5.1.23	alkaline ceramidase 2 [Source:RGD Symbol;Acc:1304629]	130.856	81.491	59.5416	196.926	173.911	212.56	0.466044	-1.10146	down
ko04071	Sphingolipid signaling pathway	0.32389	ENSRNOG00000020206	Ctsd	K01379	EC:3.4.23.5	cathepsin D [Source:RGD Symbol;Acc:621511]	548	744.981	848.372	316.023	357.412	293.272	2.2151	1.14737	up
ko04071	Sphingolipid signaling pathway	0.32389	ENSRNOG00000020901	S1pr5	K04295	NA	sphingosine-1-phosphate receptor 5 [Source:RGD Symbol;Acc:620566]	1.96026	1.50384	1.86566	3.51863	3.70608	6.33429	0.393078	-1.34711	down
ko04924	Renin secretion	0.331576	ENSRNOG00000008176	Nppa	K12334	NA	natriuretic peptide A [Source:RGD Symbol;Acc:3193]	0	0	4.77912	0	0	0	15930.4	13.9595	up
ko04924	Renin secretion	0.331576	ENSRNOG00000054212	Pde1a	K13755	EC:3.1.4.17	phosphodiesterase 1A [Source:RGD Symbol;Acc:68329]	1.57085	2.96311	2.99337	1.33966	1.12177	1.16821	2.07385	1.05231	up
ko05412	Arrhythmogenic right ventricular cardiomyopathy (ARVC)	0.331576	ENSRNOG00000014603	Sgcg	K12564	NA	sarcoglycan, gamma [Source:RGD Symbol;Acc:1359577]	6.63542	9.15155	9.08626	2.51035	4.13368	4.90106	2.15444	1.10731	up
ko05412	Arrhythmogenic right ventricular cardiomyopathy (ARVC)	0.331576	ENSRNOG00000017060	Ryr2	K04962	NA	ryanodine receptor 2 [Source:RGD Symbol;Acc:620314]	0.285075	0.300051	1.47817	0.173643	0.049516	0.188027	5.01792	2.32709	up
ko04744	Phototransduction	0.339266	ENSRNOG00000019296	Gnat2	K04631	NA	G protein subunit alpha transducin 2 [Source:RGD Symbol;Acc:1309514]	1.54464	1.73817	1.48	3.37445	2.70398	3.67333	0.488405	-1.03385	down
ko05416	Viral myocarditis	0.343608	ENSRNOG00000000562	Prf1	K07818	NA	perforin 1 [Source:RGD Symbol;Acc:708463]	11.7317	8.28855	6.91728	21.9426	12.0857	30.3654	0.418325	-1.2573	down
ko05416	Viral myocarditis	0.343608	ENSRNOG00000014603	Sgcg	K12564	NA	sarcoglycan, gamma [Source:RGD Symbol;Acc:1359577]	6.63542	9.15155	9.08626	2.51035	4.13368	4.90106	2.15444	1.10731	up
ko04721	Synaptic vesicle cycle	0.349599	ENSRNOG00000006426	Syt1	K15290	NA	synaptotagmin 1 [Source:RGD Symbol;Acc:3803]	0.535581	0.254328	0.726439	1.20032	1.83951	1.33849	0.346332	-1.52977	down
ko04721	Synaptic vesicle cycle	0.349599	ENSRNOG00000007509	Slc1a6	K05617	NA	solute carrier family 1 member 6 [Source:RGD Symbol;Acc:620340]	0.044448	0.022178	1.5478	0	0	0	5381.42	12.3938	up
ko04610	Complement and coagulation cascades	0.349599	ENSRNOG00000010935	Cpb2	K01300	EC:3.4.17.20	carboxypeptidase B2 [Source:RGD Symbol;Acc:71035]	0.417813	0.940398	0.194739	0	0	0	5176.5	12.3378	up
ko04610	Complement and coagulation cascades	0.349599	ENSRNOG00000024115	C6	K03995	NA	complement C6 [Source:RGD Symbol;Acc:2238]	3.17798	27.2636	27.2519	1.49621	1.42027	3.4023	9.13047	3.19069	up
ko00500	Starch and sucrose metabolism	0.350148	ENSRNOG00000026235	Hk3	K00844	EC:2.7.1.1	hexokinase 3 [Source:RGD Symbol;Acc:2798]	4.56077	6.16295	7.19107	3.31099	2.99085	2.64764	2.00177	1.00128	up
ko04926	Relaxin signaling pathway	0.350984	ENSRNOG00000003897	Col1a1	NA	NA	collagen type I alpha 1 chain [Source:RGD Symbol;Acc:61817]	126.27	249.911	273.591	58.1167	63.4283	51.677	3.75109	1.90731	up
ko04926	Relaxin signaling pathway	0.350984	ENSRNOG00000011292	NEWGENE_621351	K06236	NA	collagen, type I, alpha 2 [Source:RGD Symbol;Acc:9452897]	134.308	280.185	220.805	65.4149	127.389	75.4797	2.36801	1.24368	up
ko04926	Relaxin signaling pathway	0.350984	ENSRNOG00000052925	NEWGENE_621351	K06236	NA	collagen, type I, alpha 2 [Source:RGD Symbol;Acc:9452897]	44.2462	78.2478	94.465	34.5066	31.6576	31.9137	2.21211	1.14542	up
ko00052	Galactose metabolism	0.360852	ENSRNOG00000026235	Hk3	K00844	EC:2.7.1.1	hexokinase 3 [Source:RGD Symbol;Acc:2798]	4.56077	6.16295	7.19107	3.31099	2.99085	2.64764	2.00177	1.00128	up
ko00860	Porphyrin and chlorophyll metabolism	0.371382	ENSRNOG00000014117	Hmox1	K00510	EC:1.14.14.18	heme oxygenase 1 [Source:RGD Symbol;Acc:2806]	31.9406	70.2869	56.3487	14.3785	22.3463	16.8387	2.96053	1.56586	up
ko04710	Circadian rhythm	0.391927	ENSRNOG00000048961	Bhlhe41	K03730	NA	basic helix-loop-helix family, member e41 [Source:RGD Symbol;Acc:70900]	6.85014	6.52222	7.32891	3.13158	3.88331	3.13387	2.03978	1.02842	up
ko04136	Autophagy - other	0.391927	ENSRNOG00000023449	Atg9b	K17907	NA	autophagy related 9B [Source:RGD Symbol;Acc:1560887]	0.062881	0.105623	0.519309	0	0	0.006305	109.09	6.76938	up
ko05323	Rheumatoid arthritis	0.396797	ENSRNOG00000010906	Ccl5	K12499	NA	C-C motif chemokine ligand 5 [Source:RGD Symbol;Acc:69069]	48.3284	41.7605	33.5398	89.039	63.5136	135.101	0.429784	-1.21832	down
ko05323	Rheumatoid arthritis	0.396797	ENSRNOG00000021155	Ctsk	NA	NA	cathepsin K [Source:RGD Symbol;Acc:61810]	8.68873	18.433	39.2286	5.53409	8.14942	6.72412	3.25125	1.70099	up
ko05410	Hypertrophic cardiomyopathy (HCM)	0.408362	ENSRNOG00000014603	Sgcg	K12564	NA	sarcoglycan, gamma [Source:RGD Symbol;Acc:1359577]	6.63542	9.15155	9.08626	2.51035	4.13368	4.90106	2.15444	1.10731	up
ko05410	Hypertrophic cardiomyopathy (HCM)	0.408362	ENSRNOG00000017060	Ryr2	K04962	NA	ryanodine receptor 2 [Source:RGD Symbol;Acc:620314]	0.285075	0.300051	1.47817	0.173643	0.049516	0.188027	5.01792	2.32709	up
ko00250	Alanine, aspartate and glutamate metabolism	0.421504	ENSRNOG00000013704	Cps1	K01948	EC:6.3.4.16	carbamoyl-phosphate synthase 1 [Source:RGD Symbol;Acc:2395]	0.0296366	0.0318274	0.0321218	0	0	0	311.953	8.28518	up
ko05414	Dilated cardiomyopathy (DCM)	0.431166	ENSRNOG00000014603	Sgcg	K12564	NA	sarcoglycan, gamma [Source:RGD Symbol;Acc:1359577]	6.63542	9.15155	9.08626	2.51035	4.13368	4.90106	2.15444	1.10731	up
ko05414	Dilated cardiomyopathy (DCM)	0.431166	ENSRNOG00000017060	Ryr2	K04962	NA	ryanodine receptor 2 [Source:RGD Symbol;Acc:620314]	0.285075	0.300051	1.47817	0.173643	0.049516	0.188027	5.01792	2.32709	up
ko00051	Fructose and mannose metabolism	0.440425	ENSRNOG00000026235	Hk3	K00844	EC:2.7.1.1	hexokinase 3 [Source:RGD Symbol;Acc:2798]	4.56077	6.16295	7.19107	3.31099	2.99085	2.64764	2.00177	1.00128	up
ko04064	NF-kappa B signaling pathway	0.442395	ENSRNOG00000034290	Ccl21	K16062	NA	C-C motif chemokine ligand 21 [Source:RGD Symbol;Acc:1311996]	71.933	100.476	149.957	63.5991	39.5568	57.0998	2.01157	1.00832	up
ko04064	NF-kappa B signaling pathway	0.442395	ENSRNOG00000047367	Card14	K20913	NA	caspase recruitment domain family, member 14 [Source:RGD Symbol;Acc:1591135]	5.30785	6.42986	7.41549	2.63631	2.92656	1.73583	2.6242	1.39188	up
ko04350	TGF-beta signaling pathway	0.453503	ENSRNOG00000023683	Nog	K04658	NA	noggin [Source:RGD Symbol;Acc:3183]	1.3224	2.21724	1.19676	0.464518	0.534484	0.368221	3.46425	1.79254	up
ko04350	TGF-beta signaling pathway	0.453503	ENSRNOG00000026053	Grem1	NA	NA	gremlin 1, DAN family BMP antagonist [Source:RGD Symbol;Acc:2359]	0.95987	2.57523	2.25854	0.284014	0.14634	0.159551	9.82132	3.29592	up
ko04151	PI3K-Akt signaling pathway	0.464693	ENSRNOG00000002978	Faslg	K04389	NA	Fas ligand [Source:RGD Symbol;Acc:3880]	0.709471	0.473535	1.27202	2.10948	1.83509	3.11962	0.347531	-1.52479	down
ko04151	PI3K-Akt signaling pathway	0.464693	ENSRNOG00000003897	Col1a1	NA	NA	collagen type I alpha 1 chain [Source:RGD Symbol;Acc:61817]	126.27	249.911	273.591	58.1167	63.4283	51.677	3.75109	1.90731	up
ko04151	PI3K-Akt signaling pathway	0.464693	ENSRNOG00000010529	Thbs2	K04659	NA	thrombospondin 2 [Source:RGD Symbol;Acc:1310979]	2.57939	6.01878	6.82916	1.12399	1.12034	1.18604	4.49727	2.16905	up
ko04151	PI3K-Akt signaling pathway	0.464693	ENSRNOG00000011292	NEWGENE_621351	K06236	NA	collagen, type I, alpha 2 [Source:RGD Symbol;Acc:9452897]	134.308	280.185	220.805	65.4149	127.389	75.4797	2.36801	1.24368	up
ko04151	PI3K-Akt signaling pathway	0.464693	ENSRNOG00000043451	Spp1	K06250	NA	secreted phosphoprotein 1 [Source:RGD Symbol;Acc:3752]	5.06055	8.53045	47.2968	2.53233	1.09522	0.50064	14.7493	3.88257	up
ko04151	PI3K-Akt signaling pathway	0.464693	ENSRNOG00000052925	NEWGENE_621351	K06236	NA	collagen, type I, alpha 2 [Source:RGD Symbol;Acc:9452897]	44.2462	78.2478	94.465	34.5066	31.6576	31.9137	2.21211	1.14542	up
ko05216	Thyroid cancer	0.467661	ENSRNOG00000026203	Pax8	K09293	NA	paired box 8 [Source:RGD Symbol;Acc:620434]	0.679274	0.646556	1.36295	0.21796	0.383172	0.130189	3.6766	1.87837	up
ko00260	Glycine, serine and threonine metabolism	0.467661	ENSRNOG00000057089	LOC103691744	K01758	EC:4.4.1.1	cystathionine gamma-lyase [Source:RGD Symbol;Acc:9153842]	0.96608	0.707464	0.598809	2.81821	1.97099	2.30047	0.320516	-1.64153	down
ko04975	Fat digestion and absorption	0.467661	ENSRNOG00000016945	Pla2g2a	NA	NA	phospholipase A2 group IIA [Source:RGD Symbol;Acc:620857]	31.8882	19.843	49.1573	12.1527	19.2349	10.06	2.43412	1.2834	up
ko04530	Tight junction	0.503536	ENSRNOG00000022533	Micall2	K21068	NA	MICAL-like 2 [Source:RGD Symbol;Acc:1307875]	2.02891	2.05633	4.06871	1.46972	0.930644	1.29824	2.2046	1.14052	up
ko04530	Tight junction	0.503536	ENSRNOG00000022635	Dlg2	K12075	NA	discs large MAGUK scaffold protein 2 [Source:RGD Symbol;Acc:619895]	0.884341	1.52643	2.40362	0.647262	0.40045	0.624041	2.87985	1.52599	up
ko04530	Tight junction	0.503536	ENSRNOG00000048169	Tuba8	K07374	NA	tubulin, alpha 8 [Source:RGD Symbol;Acc:1566041]	1.19674	1.13894	1.48065	0.209566	0.206161	0.258689	5.65872	2.50047	up
ko04340	Hedgehog signaling pathway	0.510165	ENSRNOG00000025120	Gli1	K16797	NA	GLI family zinc finger 1 [Source:RGD Symbol;Acc:621673]	3.07771	4.09095	3.67171	1.56395	1.68971	1.52278	2.26955	1.18241	up
ko04668	TNF signaling pathway	0.532604	ENSRNOG00000007002	Lif	K05419	NA	LIF, interleukin 6 family cytokine [Source:RGD Symbol;Acc:620865]	0.880568	1.01865	1.04408	0.472627	0.322036	0.294568	2.70218	1.43413	up
ko04668	TNF signaling pathway	0.532604	ENSRNOG00000010906	Ccl5	K12499	NA	C-C motif chemokine ligand 5 [Source:RGD Symbol;Acc:69069]	48.3284	41.7605	33.5398	89.039	63.5136	135.101	0.429784	-1.21832	down
ko00270	Cysteine and methionine metabolism	0.534033	ENSRNOG00000057089	LOC103691744	K01758	EC:4.4.1.1	cystathionine gamma-lyase [Source:RGD Symbol;Acc:9153842]	0.96608	0.707464	0.598809	2.81821	1.97099	2.30047	0.320516	-1.64153	down
ko00380	Tryptophan metabolism	0.534033	ENSRNOG00000008575	Aoc1	K11182	EC:1.4.3.22	amine oxidase, copper containing 1 [Source:RGD Symbol;Acc:61296]	10.5118	32.5356	9.68949	2.66527	3.95753	3.97902	4.97433	2.3145	up
ko00565	Ether lipid metabolism	0.534033	ENSRNOG00000016945	Pla2g2a	NA	NA	phospholipase A2 group IIA [Source:RGD Symbol;Acc:620857]	31.8882	19.843	49.1573	12.1527	19.2349	10.06	2.43412	1.2834	up
ko00520	Amino sugar and nucleotide sugar metabolism	0.54173	ENSRNOG00000026235	Hk3	K00844	EC:2.7.1.1	hexokinase 3 [Source:RGD Symbol;Acc:2798]	4.56077	6.16295	7.19107	3.31099	2.99085	2.64764	2.00177	1.00128	up
ko05030	Cocaine addiction	0.54173	ENSRNOG00000028404	Ppp1r1b	K15494	NA	protein phosphatase 1, regulatory (inhibitor) subunit 1B [Source:RGD Symbol;Acc:621859]	22.4231	7.67647	15.2862	32.2533	35.5582	36.4644	0.435248	-1.20009	down
ko04930	Type II diabetes mellitus	0.54173	ENSRNOG00000026235	Hk3	K00844	EC:2.7.1.1	hexokinase 3 [Source:RGD Symbol;Acc:2798]	4.56077	6.16295	7.19107	3.31099	2.99085	2.64764	2.00177	1.00128	up
ko04913	Ovarian steroidogenesis	0.549301	ENSRNOG00000002984	Bmp15	K05498	NA	bone morphogenetic protein 15 [Source:RGD Symbol;Acc:70990]	0.893187	0.650831	0.851556	2.84528	1.94488	1.92699	0.356635	-1.48748	down
ko05144	Malaria	0.556748	ENSRNOG00000010529	Thbs2	K04659	NA	thrombospondin 2 [Source:RGD Symbol;Acc:1310979]	2.57939	6.01878	6.82916	1.12399	1.12034	1.18604	4.49727	2.16905	up
ko00600	Sphingolipid metabolism	0.556748	ENSRNOG00000007637	Acer2	K01441	EC:3.5.1.23	alkaline ceramidase 2 [Source:RGD Symbol;Acc:1304629]	130.856	81.491	59.5416	196.926	173.911	212.56	0.466044	-1.10146	down
ko00982	Drug metabolism - cytochrome P450	0.571278	ENSRNOG00000012458	Cyp2e1	K07415	EC:1.14.13.-	cytochrome P450, family 2, subfamily e, polypeptide 1 [Source:RGD Symbol;Acc:2475]	5.70974	4.74285	4.83838	17.7295	21.6301	20.9411	0.253579	-1.97949	down
ko04020	Calcium signaling pathway	0.578569	ENSRNOG00000017060	Ryr2	K04962	NA	ryanodine receptor 2 [Source:RGD Symbol;Acc:620314]	0.285075	0.300051	1.47817	0.173643	0.049516	0.188027	5.01792	2.32709	up
ko04020	Calcium signaling pathway	0.578569	ENSRNOG00000017606	P2rx1	K05215	NA	purinergic receptor P2X 1 [Source:RGD Symbol;Acc:3240]	7.18568	9.04786	9.01957	19.2409	13.9678	19.8251	0.476169	-1.07045	down
ko04020	Calcium signaling pathway	0.578569	ENSRNOG00000054212	Pde1a	K13755	EC:3.1.4.17	phosphodiesterase 1A [Source:RGD Symbol;Acc:68329]	1.57085	2.96311	2.99337	1.33966	1.12177	1.16821	2.07385	1.05231	up
ko05202	Transcriptional misregulation in cancer	0.58232	ENSRNOG00000026203	Pax8	K09293	NA	paired box 8 [Source:RGD Symbol;Acc:620434]	0.679274	0.646556	1.36295	0.21796	0.383172	0.130189	3.6766	1.87837	up
ko05202	Transcriptional misregulation in cancer	0.58232	ENSRNOG00000045973	Gzmb	K01353	EC:3.4.21.79	granzyme B [Source:RGD Symbol;Acc:620018]	2.25316	1.81994	1.79573	5.58483	4.29643	10.1425	0.293093	-1.77057	down
ko05202	Transcriptional misregulation in cancer	0.58232	ENSRNOG00000049976	Gzmbl2	K01353	EC:3.4.21.79	Granzyme B-like 2 [Source:RGD Symbol;Acc:2320097]	1.20768	0.713789	0.784046	3.07314	1.12515	4.83558	0.299486	-1.73944	down
ko00980	Metabolism of xenobiotics by cytochrome P450	0.592192	ENSRNOG00000012458	Cyp2e1	K07415	EC:1.14.13.-	cytochrome P450, family 2, subfamily e, polypeptide 1 [Source:RGD Symbol;Acc:2475]	5.70974	4.74285	4.83838	17.7295	21.6301	20.9411	0.253579	-1.97949	down
ko05134	Legionellosis	0.592192	ENSRNOG00000022067	Tlr5	K10168	NA	toll-like receptor 5 [Source:RGD Symbol;Acc:631351]	3.79088	2.48157	3.94515	1.49858	1.60221	1.77419	2.09592	1.06759	up
ko04923	Regulation of lipolysis in adipocytes	0.598936	ENSRNOG00000008176	Nppa	K12334	NA	natriuretic peptide A [Source:RGD Symbol;Acc:3193]	0	0	4.77912	0	0	0	15930.4	13.9595	up
ko04380	Osteoclast differentiation	0.603638	ENSRNOG00000013578	Trem2	K14378	NA	triggering receptor expressed on myeloid cells 2 [Source:RGD Symbol;Acc:1309841]	7.38714	14.2293	26.9458	3.19457	3.44342	4.12088	4.51369	2.17431	up
ko04380	Osteoclast differentiation	0.603638	ENSRNOG00000021155	Ctsk	NA	NA	cathepsin K [Source:RGD Symbol;Acc:61810]	8.68873	18.433	39.2286	5.53409	8.14942	6.72412	3.25125	1.70099	up
ko00240	Pyrimidine metabolism	0.605569	ENSRNOG00000013215	Dctd	K01493	EC:3.5.4.12	dCMP deaminase [Source:RGD Symbol;Acc:1359671]	1.66108	2.35547	3.79807	1.15596	1.07583	1.51322	2.08668	1.06121	up
ko04140	Autophagy - animal	0.61684	ENSRNOG00000020206	Ctsd	K01379	EC:3.4.23.5	cathepsin D [Source:RGD Symbol;Acc:621511]	548	744.981	848.372	316.023	357.412	293.272	2.2151	1.14737	up
ko04140	Autophagy - animal	0.61684	ENSRNOG00000023449	Atg9b	K17907	NA	autophagy related 9B [Source:RGD Symbol;Acc:1560887]	0.062881	0.105623	0.519309	0	0	0.006305	109.09	6.76938	up
ko00140	Steroid hormone biosynthesis	0.624824	ENSRNOG00000012458	Cyp2e1	K07415	EC:1.14.13.-	cytochrome P450, family 2, subfamily e, polypeptide 1 [Source:RGD Symbol;Acc:2475]	5.70974	4.74285	4.83838	17.7295	21.6301	20.9411	0.253579	-1.97949	down
ko04915	Estrogen signaling pathway	0.625454	ENSRNOG00000020206	Ctsd	K01379	EC:3.4.23.5	cathepsin D [Source:RGD Symbol;Acc:621511]	548	744.981	848.372	316.023	357.412	293.272	2.2151	1.14737	up
ko04915	Estrogen signaling pathway	0.625454	ENSRNOG00000026371	Krt17	K07604	NA	keratin 17 [Source:RGD Symbol;Acc:1303181]	0.712225	1.13969	8.88744	0.287772	0.439651	0.911312	6.55344	2.71225	up
ko04622	RIG-I-like receptor signaling pathway	0.637139	ENSRNOG00000017414	Irf7	K09447	NA	interferon regulatory factor 7 [Source:RGD Symbol;Acc:1307828]	50.0909	39.3499	31.835	103.562	77.9961	166.957	0.347979	-1.52293	down
ko05230	Central carbon metabolism in cancer	0.643146	ENSRNOG00000026235	Hk3	K00844	EC:2.7.1.1	hexokinase 3 [Source:RGD Symbol;Acc:2798]	4.56077	6.16295	7.19107	3.31099	2.99085	2.64764	2.00177	1.00128	up
ko00010	Glycolysis / Gluconeogenesis	0.643146	ENSRNOG00000026235	Hk3	K00844	EC:2.7.1.1	hexokinase 3 [Source:RGD Symbol;Acc:2798]	4.56077	6.16295	7.19107	3.31099	2.99085	2.64764	2.00177	1.00128	up
ko04137	Mitophagy - animal	0.643146	ENSRNOG00000023449	Atg9b	K17907	NA	autophagy related 9B [Source:RGD Symbol;Acc:1560887]	0.062881	0.105623	0.519309	0	0	0.006305	109.09	6.76938	up
ko04270	Vascular smooth muscle contraction	0.64634	ENSRNOG00000008176	Nppa	K12334	NA	natriuretic peptide A [Source:RGD Symbol;Acc:3193]	0	0	4.77912	0	0	0	15930.4	13.9595	up
ko04270	Vascular smooth muscle contraction	0.64634	ENSRNOG00000016945	Pla2g2a	NA	NA	phospholipase A2 group IIA [Source:RGD Symbol;Acc:620857]	31.8882	19.843	49.1573	12.1527	19.2349	10.06	2.43412	1.2834	up
ko05217	Basal cell carcinoma	0.649054	ENSRNOG00000025120	Gli1	K16797	NA	GLI family zinc finger 1 [Source:RGD Symbol;Acc:621673]	3.07771	4.09095	3.67171	1.56395	1.68971	1.52278	2.26955	1.18241	up
ko04550	Signaling pathways regulating pluripotency of stem cells	0.658428	ENSRNOG00000007002	Lif	K05419	NA	LIF, interleukin 6 family cytokine [Source:RGD Symbol;Acc:620865]	0.880568	1.01865	1.04408	0.472627	0.322036	0.294568	2.70218	1.43413	up
ko04550	Signaling pathways regulating pluripotency of stem cells	0.658428	ENSRNOG00000010905	Dlx5	K18489	NA	distal-less homeobox 5 [Source:RGD Symbol;Acc:2506]	0.333893	0.067122	0.257194	0	0	0	2194.03	11.0994	up
ko05031	Amphetamine addiction	0.66058	ENSRNOG00000028404	Ppp1r1b	K15494	NA	protein phosphatase 1, regulatory (inhibitor) subunit 1B [Source:RGD Symbol;Acc:621859]	22.4231	7.67647	15.2862	32.2533	35.5582	36.4644	0.435248	-1.20009	down
ko04371	Apelin signaling pathway	0.662385	ENSRNOG00000017060	Ryr2	K04962	NA	ryanodine receptor 2 [Source:RGD Symbol;Acc:620314]	0.285075	0.300051	1.47817	0.173643	0.049516	0.188027	5.01792	2.32709	up
ko04371	Apelin signaling pathway	0.662385	ENSRNOG00000043451	Spp1	K06250	NA	secreted phosphoprotein 1 [Source:RGD Symbol;Acc:3752]	5.06055	8.53045	47.2968	2.53233	1.09522	0.50064	14.7493	3.88257	up
ko05204	Chemical carcinogenesis	0.68252	ENSRNOG00000012458	Cyp2e1	K07415	EC:1.14.13.-	cytochrome P450, family 2, subfamily e, polypeptide 1 [Source:RGD Symbol;Acc:2475]	5.70974	4.74285	4.83838	17.7295	21.6301	20.9411	0.253579	-1.97949	down
ko04630	Jak-STAT signaling pathway	0.68536	ENSRNOG00000007002	Lif	K05419	NA	LIF, interleukin 6 family cytokine [Source:RGD Symbol;Acc:620865]	0.880568	1.01865	1.04408	0.472627	0.322036	0.294568	2.70218	1.43413	up
ko04630	Jak-STAT signaling pathway	0.68536	ENSRNOG00000012286	Il20ra	K05136	NA	interleukin 20 receptor subunit alpha [Source:RGD Symbol;Acc:1307335]	0	0	0.758235	0	0	0	2527.45	11.3035	up
ko04115	p53 signaling pathway	0.692956	ENSRNOG00000002640	Serpinb5	K10139	NA	serpin family B member 5 [Source:RGD Symbol;Acc:69342]	0	0	0.922211	0	0	0	3074.04	11.5859	up
ko00983	Drug metabolism - other enzymes	0.703052	ENSRNOG00000012458	Cyp2e1	K07415	EC:1.14.13.-	cytochrome P450, family 2, subfamily e, polypeptide 1 [Source:RGD Symbol;Acc:2475]	5.70974	4.74285	4.83838	17.7295	21.6301	20.9411	0.253579	-1.97949	down
ko04260	Cardiac muscle contraction	0.717582	ENSRNOG00000017060	Ryr2	K04962	NA	ryanodine receptor 2 [Source:RGD Symbol;Acc:620314]	0.285075	0.300051	1.47817	0.173643	0.049516	0.188027	5.01792	2.32709	up
ko05161	Hepatitis B	0.720819	ENSRNOG00000002978	Faslg	K04389	NA	Fas ligand [Source:RGD Symbol;Acc:3880]	0.709471	0.473535	1.27202	2.10948	1.83509	3.11962	0.347531	-1.52479	down
ko05161	Hepatitis B	0.720819	ENSRNOG00000017414	Irf7	K09447	NA	interferon regulatory factor 7 [Source:RGD Symbol;Acc:1307828]	50.0909	39.3499	31.835	103.562	77.9961	166.957	0.347979	-1.52293	down
ko04932	Non-alcoholic fatty liver disease (NAFLD)	0.720819	ENSRNOG00000002978	Faslg	K04389	NA	Fas ligand [Source:RGD Symbol;Acc:3880]	0.709471	0.473535	1.27202	2.10948	1.83509	3.11962	0.347531	-1.52479	down
ko04932	Non-alcoholic fatty liver disease (NAFLD)	0.720819	ENSRNOG00000012458	Cyp2e1	K07415	EC:1.14.13.-	cytochrome P450, family 2, subfamily e, polypeptide 1 [Source:RGD Symbol;Acc:2475]	5.70974	4.74285	4.83838	17.7295	21.6301	20.9411	0.253579	-1.97949	down
ko04921	Oxytocin signaling pathway	0.724175	ENSRNOG00000008176	Nppa	K12334	NA	natriuretic peptide A [Source:RGD Symbol;Acc:3193]	0	0	4.77912	0	0	0	15930.4	13.9595	up
ko04921	Oxytocin signaling pathway	0.724175	ENSRNOG00000017060	Ryr2	K04962	NA	ryanodine receptor 2 [Source:RGD Symbol;Acc:620314]	0.285075	0.300051	1.47817	0.173643	0.049516	0.188027	5.01792	2.32709	up
ko01524	Platinum drug resistance	0.726875	ENSRNOG00000002978	Faslg	K04389	NA	Fas ligand [Source:RGD Symbol;Acc:3880]	0.709471	0.473535	1.27202	2.10948	1.83509	3.11962	0.347531	-1.52479	down
ko04217	Necroptosis	0.727498	ENSRNOG00000002978	Faslg	K04389	NA	Fas ligand [Source:RGD Symbol;Acc:3880]	0.709471	0.473535	1.27202	2.10948	1.83509	3.11962	0.347531	-1.52479	down
ko04217	Necroptosis	0.727498	ENSRNOG00000031506	Ftl1	K13625	NA	ferritin light chain 1 [Source:RGD Symbol;Acc:61813]	52.0288	52.2376	40.6289	19.4586	27.1585	22.9462	2.08293	1.05861	up
ko04612	Antigen processing and presentation	0.735864	ENSRNOG00000060246	Klrd1	K06516	NA	killer cell lectin like receptor D1 [Source:RGD Symbol;Acc:2978]	3.34348	2.3231	3.44577	7.56228	4.74204	9.73844	0.413394	-1.27441	down
ko05132	Salmonella infection	0.735864	ENSRNOG00000022067	Tlr5	K10168	NA	toll-like receptor 5 [Source:RGD Symbol;Acc:631351]	3.79088	2.48157	3.94515	1.49858	1.60221	1.77419	2.09592	1.06759	up
ko04911	Insulin secretion	0.752973	ENSRNOG00000017060	Ryr2	K04962	NA	ryanodine receptor 2 [Source:RGD Symbol;Acc:620314]	0.285075	0.300051	1.47817	0.173643	0.049516	0.188027	5.01792	2.32709	up
ko04540	Gap junction	0.765079	ENSRNOG00000048169	Tuba8	K07374	NA	tubulin, alpha 8 [Source:RGD Symbol;Acc:1566041]	1.19674	1.13894	1.48065	0.209566	0.206161	0.258689	5.65872	2.50047	up
ko04658	Th1 and Th2 cell differentiation	0.765079	ENSRNOG00000003298	Cd247	K06453	NA	Cd247 molecule [Source:RGD Symbol;Acc:2305]	3.42781	2.27339	3.39083	5.96858	4.58895	7.66207	0.499025	-1.00282	down
ko04145	Phagosome	0.767708	ENSRNOG00000010529	Thbs2	K04659	NA	thrombospondin 2 [Source:RGD Symbol;Acc:1310979]	2.57939	6.01878	6.82916	1.12399	1.12034	1.18604	4.49727	2.16905	up
ko04145	Phagosome	0.767708	ENSRNOG00000048169	Tuba8	K07374	NA	tubulin, alpha 8 [Source:RGD Symbol;Acc:1566041]	1.19674	1.13894	1.48065	0.209566	0.206161	0.258689	5.65872	2.50047	up
ko04640	Hematopoietic cell lineage	0.772821	ENSRNOG00000037331	Cd33	K06473	NA	CD33 molecule [Source:RGD Symbol;Acc:1596020]	10.5426	13.9198	13.8458	5.21217	6.43735	5.94107	2.17777	1.12285	up
ko05032	Morphine addiction	0.78031	ENSRNOG00000054212	Pde1a	K13755	EC:3.1.4.17	phosphodiesterase 1A [Source:RGD Symbol;Acc:68329]	1.57085	2.96311	2.99337	1.33966	1.12177	1.16821	2.07385	1.05231	up
ko05225	Hepatocellular carcinoma	0.78176	ENSRNOG00000014117	Hmox1	K00510	EC:1.14.14.18	heme oxygenase 1 [Source:RGD Symbol;Acc:2806]	31.9406	70.2869	56.3487	14.3785	22.3463	16.8387	2.96053	1.56586	up
ko05225	Hepatocellular carcinoma	0.78176	ENSRNOG00000059810	Txnrd3	K22182	EC:1.8.1.9	thioredoxin reductase 3 [Source:RGD Symbol;Acc:1308363]	7.41397	9.68591	10.2151	4.19814	4.65935	4.21054	2.09021	1.06365	up
ko04713	Circadian entrainment	0.797978	ENSRNOG00000017060	Ryr2	K04962	NA	ryanodine receptor 2 [Source:RGD Symbol;Acc:620314]	0.285075	0.300051	1.47817	0.173643	0.049516	0.188027	5.01792	2.32709	up
ko04925	Aldosterone synthesis and secretion	0.797978	ENSRNOG00000008176	Nppa	K12334	NA	natriuretic peptide A [Source:RGD Symbol;Acc:3193]	0	0	4.77912	0	0	0	15930.4	13.9595	up
ko00564	Glycerophospholipid metabolism	0.801339	ENSRNOG00000016945	Pla2g2a	NA	NA	phospholipase A2 group IIA [Source:RGD Symbol;Acc:620857]	31.8882	19.843	49.1573	12.1527	19.2349	10.06	2.43412	1.2834	up
ko04660	T cell receptor signaling pathway	0.820371	ENSRNOG00000003298	Cd247	K06453	NA	Cd247 molecule [Source:RGD Symbol;Acc:2305]	3.42781	2.27339	3.39083	5.96858	4.58895	7.66207	0.499025	-1.00282	down
ko04659	Th17 cell differentiation	0.820371	ENSRNOG00000003298	Cd247	K06453	NA	Cd247 molecule [Source:RGD Symbol;Acc:2305]	3.42781	2.27339	3.39083	5.96858	4.58895	7.66207	0.499025	-1.00282	down
ko04625	C-type lectin receptor signaling pathway	0.834841	ENSRNOG00000057335	Clec1b	K10070	NA	C-type lectin domain family 1, member B [Source:RGD Symbol;Acc:1563517]	1.21217	2.20758	0.914233	3.16015	4.82792	4.73455	0.340652	-1.55363	down
ko04670	Leukocyte transendothelial migration	0.842962	ENSRNOG00000025925	Txk	K08016	EC:2.7.10.2	TXK tyrosine kinase [Source:RGD Symbol;Acc:1306481]	1.86157	1.7651	1.7296	3.59851	2.5356	5.25992	0.470094	-1.08898	down
ko05205	Proteoglycans in cancer	0.849494	ENSRNOG00000002978	Faslg	K04389	NA	Fas ligand [Source:RGD Symbol;Acc:3880]	0.709471	0.473535	1.27202	2.10948	1.83509	3.11962	0.347531	-1.52479	down
ko05205	Proteoglycans in cancer	0.849494	ENSRNOG00000004610	Lum	K08122	NA	lumican [Source:RGD Symbol;Acc:620984]	6.91226	8.37983	35.9543	5.95545	5.12494	5.60998	3.07042	1.61843	up
ko04724	Glutamatergic synapse	0.850687	ENSRNOG00000007509	Slc1a6	K05617	NA	solute carrier family 1 member 6 [Source:RGD Symbol;Acc:620340]	0.044448	0.022178	1.5478	0	0	0	5381.42	12.3938	up
ko05322	Systemic lupus erythematosus	0.858035	ENSRNOG00000024115	C6	K03995	NA	complement C6 [Source:RGD Symbol;Acc:2238]	3.17798	27.2636	27.2519	1.49621	1.42027	3.4023	9.13047	3.19069	up
ko04722	Neurotrophin signaling pathway	0.865025	ENSRNOG00000002978	Faslg	K04389	NA	Fas ligand [Source:RGD Symbol;Acc:3880]	0.709471	0.473535	1.27202	2.10948	1.83509	3.11962	0.347531	-1.52479	down
ko05206	MicroRNAs in cancer	0.869789	ENSRNOG00000002640	Serpinb5	K10139	NA	serpin family B member 5 [Source:RGD Symbol;Acc:69342]	0	0	0.922211	0	0	0	3074.04	11.5859	up
ko05206	MicroRNAs in cancer	0.869789	ENSRNOG00000014117	Hmox1	K00510	EC:1.14.14.18	heme oxygenase 1 [Source:RGD Symbol;Acc:2806]	31.9406	70.2869	56.3487	14.3785	22.3463	16.8387	2.96053	1.56586	up
ko04068	FoxO signaling pathway	0.873816	ENSRNOG00000002978	Faslg	K04389	NA	Fas ligand [Source:RGD Symbol;Acc:3880]	0.709471	0.473535	1.27202	2.10948	1.83509	3.11962	0.347531	-1.52479	down
ko04110	Cell cycle	0.873816	ENSRNOG00000029055	Ttk	K08866	EC:2.7.12.1	Ttk protein kinase [Source:RGD Symbol;Acc:1305558]	0.567316	1.43363	1.35383	0.510706	0.373299	0.471024	2.4758	1.30789	up
ko05170	Human immunodeficiency virus 1 infection	0.876529	ENSRNOG00000002978	Faslg	K04389	NA	Fas ligand [Source:RGD Symbol;Acc:3880]	0.709471	0.473535	1.27202	2.10948	1.83509	3.11962	0.347531	-1.52479	down
ko05170	Human immunodeficiency virus 1 infection	0.876529	ENSRNOG00000003298	Cd247	K06453	NA	Cd247 molecule [Source:RGD Symbol;Acc:2305]	3.42781	2.27339	3.39083	5.96858	4.58895	7.66207	0.499025	-1.00282	down
ko04910	Insulin signaling pathway	0.882039	ENSRNOG00000026235	Hk3	K00844	EC:2.7.1.1	hexokinase 3 [Source:RGD Symbol;Acc:2798]	4.56077	6.16295	7.19107	3.31099	2.99085	2.64764	2.00177	1.00128	up
ko04728	Dopaminergic synapse	0.88401	ENSRNOG00000028404	Ppp1r1b	K15494	NA	protein phosphatase 1, regulatory (inhibitor) subunit 1B [Source:RGD Symbol;Acc:621859]	22.4231	7.67647	15.2862	32.2533	35.5582	36.4644	0.435248	-1.20009	down
ko00230	Purine metabolism	0.887855	ENSRNOG00000054212	Pde1a	K13755	EC:3.1.4.17	phosphodiesterase 1A [Source:RGD Symbol;Acc:68329]	1.57085	2.96311	2.99337	1.33966	1.12177	1.16821	2.07385	1.05231	up
ko04014	Ras signaling pathway	0.892008	ENSRNOG00000002978	Faslg	K04389	NA	Fas ligand [Source:RGD Symbol;Acc:3880]	0.709471	0.473535	1.27202	2.10948	1.83509	3.11962	0.347531	-1.52479	down
ko04014	Ras signaling pathway	0.892008	ENSRNOG00000016945	Pla2g2a	NA	NA	phospholipase A2 group IIA [Source:RGD Symbol;Acc:620857]	31.8882	19.843	49.1573	12.1527	19.2349	10.06	2.43412	1.2834	up
ko04120	Ubiquitin mediated proteolysis	0.898649	ENSRNOG00000015131	Ube2c	K06688	EC:2.3.2.23	ubiquitin-conjugating enzyme E2C [Source:RGD Symbol;Acc:1305382]	1.0802	2.16214	1.89892	0.453385	0.352019	0.668492	3.48821	1.80249	up
ko05163	Human cytomegalovirus infection	0.900418	ENSRNOG00000002978	Faslg	K04389	NA	Fas ligand [Source:RGD Symbol;Acc:3880]	0.709471	0.473535	1.27202	2.10948	1.83509	3.11962	0.347531	-1.52479	down
ko05163	Human cytomegalovirus infection	0.900418	ENSRNOG00000010906	Ccl5	K12499	NA	C-C motif chemokine ligand 5 [Source:RGD Symbol;Acc:69069]	48.3284	41.7605	33.5398	89.039	63.5136	135.101	0.429784	-1.21832	down
ko04261	Adrenergic signaling in cardiomyocytes	0.905266	ENSRNOG00000017060	Ryr2	K04962	NA	ryanodine receptor 2 [Source:RGD Symbol;Acc:620314]	0.285075	0.300051	1.47817	0.173643	0.049516	0.188027	5.01792	2.32709	up
ko05418	Fluid shear stress and atherosclerosis	0.912937	ENSRNOG00000014117	Hmox1	K00510	EC:1.14.14.18	heme oxygenase 1 [Source:RGD Symbol;Acc:2806]	31.9406	70.2869	56.3487	14.3785	22.3463	16.8387	2.96053	1.56586	up
ko04072	Phospholipase D signaling pathway	0.915831	ENSRNOG00000048239	Cxcr1	K04175	NA	C-X-C motif chemokine receptor 1 [Source:RGD Symbol;Acc:2905]	12.0581	12.2964	6.19431	5.02716	3.39089	4.10572	2.43926	1.28645	up
ko04390	Hippo signaling pathway	0.921334	ENSRNOG00000022635	Dlg2	K12075	NA	discs large MAGUK scaffold protein 2 [Source:RGD Symbol;Acc:619895]	0.884341	1.52643	2.40362	0.647262	0.40045	0.624041	2.87985	1.52599	up
ko04310	Wnt signaling pathway	0.926481	ENSRNOG00000017783	Sfrp1	K02166	NA	secreted frizzled-related protein 1 [Source:RGD Symbol;Acc:621074]	1.68002	2.38548	4.44256	1.64961	1.21244	0.920778	2.24913	1.16937	up
ko05200	Pathways in cancer	0.933831	ENSRNOG00000002978	Faslg	K04389	NA	Fas ligand [Source:RGD Symbol;Acc:3880]	0.709471	0.473535	1.27202	2.10948	1.83509	3.11962	0.347531	-1.52479	down
ko05200	Pathways in cancer	0.933831	ENSRNOG00000014117	Hmox1	K00510	EC:1.14.14.18	heme oxygenase 1 [Source:RGD Symbol;Acc:2806]	31.9406	70.2869	56.3487	14.3785	22.3463	16.8387	2.96053	1.56586	up
ko05200	Pathways in cancer	0.933831	ENSRNOG00000025120	Gli1	K16797	NA	GLI family zinc finger 1 [Source:RGD Symbol;Acc:621673]	3.07771	4.09095	3.67171	1.56395	1.68971	1.52278	2.26955	1.18241	up
ko05200	Pathways in cancer	0.933831	ENSRNOG00000026203	Pax8	K09293	NA	paired box 8 [Source:RGD Symbol;Acc:620434]	0.679274	0.646556	1.36295	0.21796	0.383172	0.130189	3.6766	1.87837	up
ko05200	Pathways in cancer	0.933831	ENSRNOG00000059810	Txnrd3	K22182	EC:1.8.1.9	thioredoxin reductase 3 [Source:RGD Symbol;Acc:1308363]	7.41397	9.68591	10.2151	4.19814	4.65935	4.21054	2.09021	1.06365	up
ko04022	cGMP-PKG signaling pathway	0.936872	ENSRNOG00000008176	Nppa	K12334	NA	natriuretic peptide A [Source:RGD Symbol;Acc:3193]	0	0	4.77912	0	0	0	15930.4	13.9595	up
ko05152	Tuberculosis	0.936872	ENSRNOG00000020206	Ctsd	K01379	EC:3.4.23.5	cathepsin D [Source:RGD Symbol;Acc:621511]	548	744.981	848.372	316.023	357.412	293.272	2.2151	1.14737	up
ko03010	Ribosome	0.938975	ENSRNOG00000032825	LOC100362027	K02908	NA	ribosomal protein L30 [Source:RGD Symbol;Acc:621201]	29.6581	57.4997	72.8836	227.708	210.401	65.5614	0.317751	-1.65403	down
ko05034	Alcoholism	0.942976	ENSRNOG00000028404	Ppp1r1b	K15494	NA	protein phosphatase 1, regulatory (inhibitor) subunit 1B [Source:RGD Symbol;Acc:621859]	22.4231	7.67647	15.2862	32.2533	35.5582	36.4644	0.435248	-1.20009	down
ko04360	Axon guidance	0.951052	ENSRNOG00000011858	Unc5d	K07521	NA	unc-5 netrin receptor D [Source:RGD Symbol;Acc:1309245]	0	0.0165455	0	0.397214	0.0649044	0.0837426	0.0303107	-5.04403	down
ko05167	Kaposi sarcoma-associated herpesvirus infection	0.958701	ENSRNOG00000017414	Irf7	K09447	NA	interferon regulatory factor 7 [Source:RGD Symbol;Acc:1307828]	50.0909	39.3499	31.835	103.562	77.9961	166.957	0.347979	-1.52293	down
ko04810	Regulation of actin cytoskeleton	0.970621	ENSRNOG00000027894	Iqgap3	K05767	NA	IQ motif containing GTPase activating protein 3 [Source:RGD Symbol;Acc:1305951]	1.60168	2.19219	2.04078	0.916376	0.778468	1.20012	2.01545	1.0111	up
ko05203	Viral carcinogenesis	0.97348	ENSRNOG00000017414	Irf7	K09447	NA	interferon regulatory factor 7 [Source:RGD Symbol;Acc:1307828]	50.0909	39.3499	31.835	103.562	77.9961	166.957	0.347979	-1.52293	down
ko04714	Thermogenesis	0.980166	ENSRNOG00000008176	Nppa	K12334	NA	natriuretic peptide A [Source:RGD Symbol;Acc:3193]	0	0	4.77912	0	0	0	15930.4	13.9595	up
ko04144	Endocytosis	0.986628	ENSRNOG00000048239	Cxcr1	K04175	NA	C-X-C motif chemokine receptor 1 [Source:RGD Symbol;Acc:2905]	12.0581	12.2964	6.19431	5.02716	3.39089	4.10572	2.43926	1.28645	up
ko04010	MAPK signaling pathway	0.992927	ENSRNOG00000002978	Faslg	K04389	NA	Fas ligand [Source:RGD Symbol;Acc:3880]	0.709471	0.473535	1.27202	2.10948	1.83509	3.11962	0.347531	-1.52479	down
ko04740	Olfactory transduction	0.99541	ENSRNOG00000054212	Pde1a	K13755	EC:3.1.4.17	phosphodiesterase 1A [Source:RGD Symbol;Acc:68329]	1.57085	2.96311	2.99337	1.33966	1.12177	1.16821	2.07385	1.05231	up
