# Supplementary material for: Analysis of the Potential Relationship between Aging and Pulmonary Fibrosis Based on Transcriptome
Source: Life (Basel). 2022 Nov 23;12(12):1961. doi: 10.3390/life12121961 (PMC9788318; doi:10.3390/life12121961)
Supplement: Supplementary file 1 [file life-12-01961-s001.zip › Table S6-o-PF vs o-Sham KEGG enrichment Gene of Figure 3D.xlsx]

## Sheet: Sheet1
pathway_id	pathway_name	pvalue	Gene_ID	Gene_name	KO_ENTRY	EC	Description	FPKM.O_PF1	FPKM.O_PF2	FPKM.O_PF3	FPKM.O_Sham1	FPKM.O_Sham2	FPKM.O_Sham3	fc	log2(fc)	regulation
ko04060	Cytokine-cytokine receptor interaction	2.40008e-12	ENSRNOG00000000187	Csf2rb	K04738	NA	colony stimulating factor 2 receptor beta common subunit [Source:RGD Symbol;Acc:620189]	18.4435	13.9751	14.6689	8.13905	5.53808	7.54263	2.21904	1.14993	up
ko04060	Cytokine-cytokine receptor interaction	2.40008e-12	ENSRNOG00000000239	Ccl7	K05509	NA	C-C motif chemokine ligand 7 [Source:RGD Symbol;Acc:1359152]	14.4232	11.1589	18.1968	0.946133	0.831492	2.17106	11.087	3.47079	up
ko04060	Cytokine-cytokine receptor interaction	2.40008e-12	ENSRNOG00000002418	Tgfb2	K13376	NA	transforming growth factor, beta 2 [Source:RGD Symbol;Acc:70491]	32.2616	34.4352	34.8496	12.3645	10.9716	12.4504	2.83756	1.50465	up
ko04060	Cytokine-cytokine receptor interaction	2.40008e-12	ENSRNOG00000002978	Faslg	K04389	NA	Fas ligand [Source:RGD Symbol;Acc:3880]	0.816894	1.01133	0.807977	3.43662	5.79528	3.71874	0.203558	-2.29649	down
ko04060	Cytokine-cytokine receptor interaction	2.40008e-12	ENSRNOG00000002984	Bmp15	K05498	NA	bone morphogenetic protein 15 [Source:RGD Symbol;Acc:70990]	0.45701	0.765327	0.542995	2.39819	2.9696	2.67733	0.219429	-2.18817	down
ko04060	Cytokine-cytokine receptor interaction	2.40008e-12	ENSRNOG00000003546	Tnfrsf12a	K05149	NA	TNF receptor superfamily member 12A [Source:RGD Symbol;Acc:631329]	41.3385	35.8452	71.9517	14.1135	11.348	9.02931	4.32393	2.11234	up
ko04060	Cytokine-cytokine receptor interaction	2.40008e-12	ENSRNOG00000004470	Il24	K22668	NA	interleukin 24 [Source:RGD Symbol;Acc:621484]	4.71744	2.76935	8.35128	0.381472	0.213099	0.210391	19.6755	4.29833	up
ko04060	Cytokine-cytokine receptor interaction	2.40008e-12	ENSRNOG00000004828	Acvr1c	K13568	EC:2.7.11.30	activin A receptor type 1C [Source:RGD Symbol;Acc:621789]	0.12058	0.010915	0.092872	0.332658	0.442515	0.377397	0.194667	-2.36092	down
ko04060	Cytokine-cytokine receptor interaction	2.40008e-12	ENSRNOG00000005954	Il5ra	K05067	NA	interleukin 5 receptor subunit alpha [Source:RGD Symbol;Acc:70938]	0.037047	0.036962	0.021553	0.143935	0.05033	0.188178	0.249873	-2.00074	down
ko04060	Cytokine-cytokine receptor interaction	2.40008e-12	ENSRNOG00000006311	Ccr9	K04184	NA	C-C motif chemokine receptor 9 [Source:RGD Symbol;Acc:628750]	0.257415	0.243861	0.157072	0.830937	1.15195	0.453854	0.270175	-1.88803	down
ko04060	Cytokine-cytokine receptor interaction	2.40008e-12	ENSRNOG00000006620	Xcr1	K04193	NA	X-C motif chemokine receptor 1 [Source:RGD Symbol;Acc:1311480]	1.18516	1.08826	0.853155	0.531912	0.487721	0.484413	2.07878	1.05573	up
ko04060	Cytokine-cytokine receptor interaction	2.40008e-12	ENSRNOG00000006736	Ccr3	K04178	NA	C-C motif chemokine receptor 3 [Source:RGD Symbol;Acc:620593]	0.551225	0.302268	0.337885	1.23779	0.699775	0.888156	0.421619	-1.24599	down
ko04060	Cytokine-cytokine receptor interaction	2.40008e-12	ENSRNOG00000007002	Lif	K05419	NA	LIF, interleukin 6 family cytokine [Source:RGD Symbol;Acc:620865]	2.79472	2.7336	5.46239	0.419517	0.645634	0.611047	6.55692	2.71302	up
ko04060	Cytokine-cytokine receptor interaction	2.40008e-12	ENSRNOG00000007159	Ccl2	K14624	NA	C-C motif chemokine ligand 2 [Source:RGD Symbol;Acc:3645]	37.7066	18.9936	41.8423	1.20024	1.4775	2.90705	17.6448	4.14117	up
ko04060	Cytokine-cytokine receptor interaction	2.40008e-12	ENSRNOG00000007270	Il12rb2	K05064	NA	interleukin 12 receptor subunit beta 2 [Source:RGD Symbol;Acc:620026]	0.854936	0.779215	0.717746	1.59409	2.39643	2.03746	0.390164	-1.35785	down
ko04060	Cytokine-cytokine receptor interaction	2.40008e-12	ENSRNOG00000007335	Ccl11	NA	NA	C-C motif chemokine ligand 11 [Source:RGD Symbol;Acc:3644]	3.34409	1.3286	2.39904	6.15745	3.9376	18.2383	0.249591	-2.00236	down
ko04060	Cytokine-cytokine receptor interaction	2.40008e-12	ENSRNOG00000007468	Ifng	K04687	NA	interferon gamma [Source:RGD Symbol;Acc:2866]	0	0	0	0.111509	0.315579	0.259981	0.000436637	-11.1613	down
ko04060	Cytokine-cytokine receptor interaction	2.40008e-12	ENSRNOG00000007664	Tnfrsf13c	K05151	NA	TNF receptor superfamily member 13C [Source:RGD Symbol;Acc:1560810]	0.348704	0.346682	0.160939	0.424374	1.26822	0.783325	0.345861	-1.53174	down
ko04060	Cytokine-cytokine receptor interaction	2.40008e-12	ENSRNOG00000007810	Gdf6	K20012	NA	growth differentiation factor 6 [Source:RGD Symbol;Acc:620104]	0.222642	0.323762	0.898277	0.028828	0.075581	0.015319	12.0664	3.59292	up
ko04060	Cytokine-cytokine receptor interaction	2.40008e-12	ENSRNOG00000008336	Tnfrsf11b	K05148	NA	TNF receptor superfamily member 11B [Source:RGD Symbol;Acc:619802]	15.8317	17.9665	17.8888	5.69922	5.57279	7.20068	2.79802	1.48441	up
ko04060	Cytokine-cytokine receptor interaction	2.40008e-12	ENSRNOG00000008759	Csf3r	K05061	NA	colony stimulating factor 3 receptor [Source:RGD Symbol;Acc:1309114]	4.8101	3.47951	3.78326	8.0264	6.94395	12.168	0.444864	-1.16856	down
ko04060	Cytokine-cytokine receptor interaction	2.40008e-12	ENSRNOG00000009867	Tgfb3	K13377	NA	transforming growth factor, beta 3 [Source:RGD Symbol;Acc:3851]	28.04	20.6768	22.6266	8.0599	7.08636	6.45932	3.30208	1.72338	up
ko04060	Cytokine-cytokine receptor interaction	2.40008e-12	ENSRNOG00000010278	Il6	K05405	NA	interleukin 6 [Source:RGD Symbol;Acc:2901]	3.16485	2.11915	11.0231	0.116354	0.115796	0.224046	35.7458	5.1597	up
ko04060	Cytokine-cytokine receptor interaction	2.40008e-12	ENSRNOG00000010906	Ccl5	K12499	NA	C-C motif chemokine ligand 5 [Source:RGD Symbol;Acc:69069]	33.6073	45.533	17.0812	161.621	269.977	147.801	0.166071	-2.59013	down
ko04060	Cytokine-cytokine receptor interaction	2.40008e-12	ENSRNOG00000011478	Ackr4	K04186	NA	atypical chemokine receptor 4 [Source:RGD Symbol;Acc:1596453]	3.742	6.72369	4.6503	10.6668	9.95579	14.6032	0.429117	-1.22056	down
ko04060	Cytokine-cytokine receptor interaction	2.40008e-12	ENSRNOG00000011696	Lifr	K05058	NA	LIF receptor subunit alpha [Source:RGD Symbol;Acc:621431]	14.613	20.5057	9.77783	34.2651	45.0252	57.9032	0.32725	-1.61154	down
ko04060	Cytokine-cytokine receptor interaction	2.40008e-12	ENSRNOG00000013820	Tnfrsf14	K05152	NA	TNF receptor superfamily member 14 [Source:RGD Symbol;Acc:1310115]	3.84677	5.07738	1.83973	8.30551	13.733	9.78681	0.338218	-1.56397	down
ko04060	Cytokine-cytokine receptor interaction	2.40008e-12	ENSRNOG00000014269	Cxcr2	NA	NA	C-X-C motif chemokine receptor 2 [Source:RGD Symbol;Acc:2906]	2.28515	1.28783	1.53123	4.02702	2.16233	5.47115	0.437735	-1.19187	down
ko04060	Cytokine-cytokine receptor interaction	2.40008e-12	ENSRNOG00000014320	Inhba	NA	NA	inhibin subunit beta A [Source:RGD Symbol;Acc:62074]	1.43305	0.871656	0.743097	0.170937	0.044034	0.019916	12.9756	3.69773	up
ko04060	Cytokine-cytokine receptor interaction	2.40008e-12	ENSRNOG00000014477	Acvr2b	K13596	EC:2.7.11.30	activin A receptor type 2B [Source:RGD Symbol;Acc:2028]	0.997803	0.727357	0.43188	1.44913	1.08119	1.98019	0.478225	-1.06424	down
ko04060	Cytokine-cytokine receptor interaction	2.40008e-12	ENSRNOG00000015498	Il17rb	K05165	NA	interleukin 17 receptor B [Source:RGD Symbol;Acc:1311392]	0.268123	0.552621	0.235806	0.712137	0.650552	1.55407	0.362234	-1.46501	down
ko04060	Cytokine-cytokine receptor interaction	2.40008e-12	ENSRNOG00000015615	Tnfrsf11a	K05147	NA	TNF receptor superfamily member 11A [Source:RGD Symbol;Acc:1563614]	11.8889	9.01333	10.4355	4.72597	5.05818	3.3997	2.37698	1.24913	up
ko04060	Cytokine-cytokine receptor interaction	2.40008e-12	ENSRNOG00000015992	Ccl20	NA	NA	C-C motif chemokine ligand 20 [Source:RGD Symbol;Acc:3646]	3.55187	1.52624	2.52854	0.934769	1.07933	0.51172	3.01156	1.59051	up
ko04060	Cytokine-cytokine receptor interaction	2.40008e-12	ENSRNOG00000016278	Ccl17	K21083	NA	C-C motif chemokine ligand 17 [Source:RGD Symbol;Acc:619924]	3.89019	6.53501	5.24364	1.31455	3.29401	1.16464	2.71406	1.44045	up
ko04060	Cytokine-cytokine receptor interaction	2.40008e-12	ENSRNOG00000016535	Ccl22	K21095	NA	C-C motif chemokine ligand 22 [Source:RGD Symbol;Acc:619933]	0.579045	2.03706	1.27757	0.082517	0.590059	0.297163	4.01517	2.00546	up
ko04060	Cytokine-cytokine receptor interaction	2.40008e-12	ENSRNOG00000016571	Ngf	K02582	NA	nerve growth factor [Source:RGD Symbol;Acc:1598328]	0.683532	0.348949	0.591755	0.156563	0.22621	0.0462036	3.78631	1.92079	up
ko04060	Cytokine-cytokine receptor interaction	2.40008e-12	ENSRNOG00000019216	Il12rb1	K05063	NA	interleukin 12 receptor subunit beta 1 [Source:RGD Symbol;Acc:620025]	0.585973	0.344356	0.316211	1.4795	2.72557	0.888842	0.244712	-2.03084	down
ko04060	Cytokine-cytokine receptor interaction	2.40008e-12	ENSRNOG00000019695	Il17b	K05490	NA	interleukin 17B [Source:RGD Symbol;Acc:620614]	1.02491	1.03218	0.807308	0.063734	0.31913	0.242836	4.57791	2.19469	up
ko04060	Cytokine-cytokine receptor interaction	2.40008e-12	ENSRNOG00000021276	Bmp2	NA	NA	bone morphogenetic protein 2 [Source:RGD Symbol;Acc:2211]	3.40519	7.43167	5.53057	2.54594	1.70193	2.53326	2.41367	1.27123	up
ko04060	Cytokine-cytokine receptor interaction	2.40008e-12	ENSRNOG00000021294	Mstn	NA	NA	myostatin [Source:RGD Symbol;Acc:3115]	0.239236	0.420771	0.61312	0	0	0	4243.76	12.0511	up
ko04060	Cytokine-cytokine receptor interaction	2.40008e-12	ENSRNOG00000021851	Ccl1	K05514	NA	C-C motif chemokine ligand 1 [Source:RGD Symbol;Acc:1586495]	1.29096	0.891293	0.828182	0.159979	0	0	18.8177	4.23402	up
ko04060	Cytokine-cytokine receptor interaction	2.40008e-12	ENSRNOG00000022298	Cxcl11	K12672	NA	C-X-C motif chemokine ligand 11 [Source:RGD Symbol;Acc:727827]	0.612395	0.600572	0.531235	0.05833	0.123484	0.076764	6.74536	2.7539	up
ko04060	Cytokine-cytokine receptor interaction	2.40008e-12	ENSRNOG00000023664	Lepr	K05062	NA	leptin receptor [Source:RGD Symbol;Acc:3001]	1.64218	1.61979	1.27077	3.58304	4.59652	3.2965	0.394973	-1.34017	down
ko04060	Cytokine-cytokine receptor interaction	2.40008e-12	ENSRNOG00000026607	Tnfsf18	K05479	NA	TNF superfamily member 18 [Source:RGD Symbol;Acc:1305066]	0.492465	0.608781	1.13661	0.246963	0.212734	0.186109	3.46521	1.79294	up
ko04060	Cytokine-cytokine receptor interaction	2.40008e-12	ENSRNOG00000027466	Cd27	K05144	NA	CD27 molecule [Source:RGD Symbol;Acc:1560499]	0.680023	0.426376	0.24904	1.10854	1.27048	1.14024	0.385149	-1.37651	down
ko04060	Cytokine-cytokine receptor interaction	2.40008e-12	ENSRNOG00000028377	Mpl	K05082	NA	MPL proto-oncogene, thrombopoietin receptor [Source:RGD Symbol;Acc:1311069]	0.300416	0.171127	0.164175	0.672625	0.583904	0.639335	0.335318	-1.5764	down
ko04060	Cytokine-cytokine receptor interaction	2.40008e-12	ENSRNOG00000029768	Ccl12	K14624	NA	chemokine (C-C motif) ligand 12 [Source:RGD Symbol;Acc:1309255]	6.0007	2.47451	2.57848	0	0.075135	0.603588	16.286	4.02556	up
ko04060	Cytokine-cytokine receptor interaction	2.40008e-12	ENSRNOG00000030155	Bmp8a	K16622	NA	bone morphogenetic protein 8a [Source:RGD Symbol;Acc:1585858]	0.24594	0.142431	0.13281	0.675516	0.572486	0.397535	0.316724	-1.6587	down
ko04060	Cytokine-cytokine receptor interaction	2.40008e-12	ENSRNOG00000031162	Ccl24	K21097	NA	C-C motif chemokine ligand 24 [Source:RGD Symbol;Acc:1310245]	5.13001	4.48235	6.31795	1.67853	1.29167	1.65069	3.44746	1.78553	up
ko04060	Cytokine-cytokine receptor interaction	2.40008e-12	ENSRNOG00000032973	Il13ra2	K05077	NA	interleukin 13 receptor subunit alpha 2 [Source:RGD Symbol;Acc:620838]	0.829589	0.965275	0.72487	0.528699	0.130525	0.092317	3.35276	1.74535	up
ko04060	Cytokine-cytokine receptor interaction	2.40008e-12	ENSRNOG00000033192	Osmr	K05057	NA	oncostatin M receptor [Source:RGD Symbol;Acc:1302983]	11.718	9.37308	19.7537	4.0249	3.86177	3.74351	3.51197	1.81228	up
ko04060	Cytokine-cytokine receptor interaction	2.40008e-12	ENSRNOG00000033209	Bmp8b	K16622	NA	bone morphogenetic protein 8b [Source:RGD Symbol;Acc:1591873]	0.366519	0.45209	0.546395	1.03207	1.66145	1.31074	0.340888	-1.55263	down
ko04060	Cytokine-cytokine receptor interaction	2.40008e-12	ENSRNOG00000034290	Ccl21	K16062	NA	C-C motif chemokine ligand 21 [Source:RGD Symbol;Acc:1311996]	171.913	158.057	123.877	70.7503	53.7025	41.4424	2.73575	1.45194	up
ko04060	Cytokine-cytokine receptor interaction	2.40008e-12	ENSRNOG00000036942	Tnfrsf9	K05146	NA	TNF receptor superfamily member 9 [Source:RGD Symbol;Acc:1598208]	1.60567	0.978749	1.45256	0.415636	0.245613	0.343968	4.01603	2.00577	up
ko04060	Cytokine-cytokine receptor interaction	2.40008e-12	ENSRNOG00000045595	Tnfsf9	K05472	NA	TNF superfamily member 9 [Source:RGD Symbol;Acc:727974]	2.88929	3.86285	2.14834	0.097061	0.890483	0.252154	7.17956	2.84389	up
ko04060	Cytokine-cytokine receptor interaction	2.40008e-12	ENSRNOG00000047307	Cntfr	K05059	NA	ciliary neurotrophic factor receptor [Source:RGD Symbol;Acc:1303100]	0.496101	0.273565	0.223928	1.66573	2.19656	2.404	0.158562	-2.65688	down
ko04060	Cytokine-cytokine receptor interaction	2.40008e-12	ENSRNOG00000048636	Il2rb	K05069	NA	interleukin 2 receptor subunit beta [Source:RGD Symbol;Acc:2896]	6.32093	7.65754	3.20297	18.9429	37.4261	22.1126	0.218923	-2.1915	down
ko04060	Cytokine-cytokine receptor interaction	2.40008e-12	ENSRNOG00000054218	Il18rap	K05174	NA	interleukin 18 receptor accessory protein [Source:RGD Symbol;Acc:727867]	1.06497	1.16437	1.02399	2.2962	4.45823	2.34981	0.357343	-1.48462	down
ko04060	Cytokine-cytokine receptor interaction	2.40008e-12	ENSRNOG00000058856	Tslp	K05436	NA	thymic stromal lymphopoietin [Source:RGD Symbol;Acc:1586479]	4.0925	4.31334	5.15534	2.10864	0.980242	2.14351	2.59177	1.37394	up
ko04512	ECM-receptor interaction	8.16538e-08	ENSRNOG00000001249	Col6a1	K06238	NA	collagen type VI alpha 1 chain [Source:RGD Symbol;Acc:1565398]	133.697	116.137	100.859	46.125	44.8447	58.8249	2.34116	1.22722	up
ko04512	ECM-receptor interaction	8.16538e-08	ENSRNOG00000001254	Col6a2	K06238	NA	collagen type VI alpha 2 chain [Source:RGD Symbol;Acc:1305585]	151.096	132.236	115.094	51.6944	53.0243	62.9982	2.37559	1.24829	up
ko04512	ECM-receptor interaction	8.16538e-08	ENSRNOG00000002158	Ibsp	K06253	NA	integrin-binding sialoprotein [Source:RGD Symbol;Acc:2855]	2.52661	2.01495	2.65804	0.518978	0.429105	0.498763	4.97606	2.315	up
ko04512	ECM-receptor interaction	8.16538e-08	ENSRNOG00000002548	Tnn	K06252	NA	tenascin N [Source:RGD Symbol;Acc:1306002]	3.51992	0.787354	1.0593	0.259756	0.338104	0.237335	6.42553	2.68382	up
ko04512	ECM-receptor interaction	8.16538e-08	ENSRNOG00000003897	Col1a1	NA	NA	collagen type I alpha 1 chain [Source:RGD Symbol;Acc:61817]	330.164	210.993	127.588	21.9343	20.0594	21.0288	10.6112	3.40752	up
ko04512	ECM-receptor interaction	8.16538e-08	ENSRNOG00000006569	Itgb8	K06591	NA	integrin subunit beta 8 [Source:RGD Symbol;Acc:1311374]	2.69064	1.81036	3.42008	1.06221	1.22856	0.71459	2.63565	1.39816	up
ko04512	ECM-receptor interaction	8.16538e-08	ENSRNOG00000006723	Itga11	K06587	NA	integrin subunit alpha 11 [Source:RGD Symbol;Acc:1311711]	2.02577	0.948998	1.43154	0.445333	0.566447	0.898136	2.30707	1.20606	up
ko04512	ECM-receptor interaction	8.16538e-08	ENSRNOG00000010529	Thbs2	K04659	NA	thrombospondin 2 [Source:RGD Symbol;Acc:1310979]	16.9175	9.7328	15.9974	0.842375	0.59486	0.649489	20.4376	4.35316	up
ko04512	ECM-receptor interaction	8.16538e-08	ENSRNOG00000011292	NEWGENE_621351	K06236	NA	collagen, type I, alpha 2 [Source:RGD Symbol;Acc:9452897]	262.119	200.003	149.732	39.3449	35.4719	44.7937	5.11539	2.35484	up
ko04512	ECM-receptor interaction	8.16538e-08	ENSRNOG00000014288	Fn1	K05717	NA	fibronectin 1 [Source:RGD Symbol;Acc:2624]	280.945	248.379	229.735	57.4707	64.5711	77.3481	3.80691	1.92862	up
ko04512	ECM-receptor interaction	8.16538e-08	ENSRNOG00000016281	Col4a1	K06237	NA	collagen type IV alpha 1 chain [Source:RGD Symbol;Acc:1307148]	228.604	293.978	253.367	78.1782	93.3833	113.433	2.72268	1.44503	up
ko04512	ECM-receptor interaction	8.16538e-08	ENSRNOG00000017237	Lama1	K05637	NA	laminin subunit alpha 1 [Source:RGD Symbol;Acc:1307207]	0.012656	0.0023	0.040977	0	0	0	186.443	7.54259	up
ko04512	ECM-receptor interaction	8.16538e-08	ENSRNOG00000019648	AABR07068316	K06238	NA	collagen type VI alpha 3 chain [Source:NCBI gene;Acc:367313]	40.6971	40.1941	29.747	15.4429	18.342	18.1571	2.13003	1.09088	up
ko04512	ECM-receptor interaction	8.16538e-08	ENSRNOG00000021441	Reln	K06249	EC:3.4.21.-	reelin [Source:RGD Symbol;Acc:3553]	1.29369	0.821935	0.847471	0.404149	0.376892	0.356867	2.60398	1.38072	up
ko04512	ECM-receptor interaction	8.16538e-08	ENSRNOG00000023972	Col4a2	K06237	NA	collagen type IV alpha 2 chain [Source:RGD Symbol;Acc:1308085]	134.643	170.785	148.447	55.5573	64.3337	79.1798	2.27997	1.18901	up
ko04512	ECM-receptor interaction	8.16538e-08	ENSRNOG00000031782	Col6a4	K06238	NA	collagen, type VI, alpha 4 [Source:RGD Symbol;Acc:1564060]	1.63066	2.88537	1.2454	5.02547	6.16786	9.0251	0.284959	-1.81117	down
ko04512	ECM-receptor interaction	8.16538e-08	ENSRNOG00000043451	Spp1	K06250	NA	secreted phosphoprotein 1 [Source:RGD Symbol;Acc:3752]	129.555	106.043	88.3967	9.8296	1.21233	1.83191	25.1669	4.65346	up
ko04512	ECM-receptor interaction	8.16538e-08	ENSRNOG00000045829	Thbs1	K16857	NA	thrombospondin 1 [Source:RGD Symbol;Acc:1588455]	69.4641	106.372	164.303	19.9347	19.858	26.7682	5.11019	2.35338	up
ko04512	ECM-receptor interaction	8.16538e-08	ENSRNOG00000052925	NEWGENE_621351	K06236	NA	collagen, type I, alpha 2 [Source:RGD Symbol;Acc:9452897]	98.967	66.7797	60.9449	18.46	15.0008	14.0315	4.77323	2.25497	up
ko04512	ECM-receptor interaction	8.16538e-08	ENSRNOG00000056129	LOC102554659	K06247	NA	laminin subunit gamma-3-like [Source:RGD Symbol;Acc:7518353]	0.143205	0.092271	0.140703	0.320804	0.459925	0.441261	0.307841	-1.69974	down
ko04512	ECM-receptor interaction	8.16538e-08	ENSRNOG00000058111	Itga2	K06481	NA	integrin subunit alpha 2 [Source:RGD Symbol;Acc:621632]	2.02287	2.41017	1.73864	0.541871	0.886078	0.645843	2.97604	1.57339	up
ko04512	ECM-receptor interaction	8.16538e-08	ENSRNOG00000058645	Tnc	K06252	NA	tenascin C [Source:RGD Symbol;Acc:621057]	32.8819	24.6221	38.6851	6.23045	5.06284	5.64608	5.67843	2.50549	up
ko04512	ECM-receptor interaction	8.16538e-08	ENSRNOG00000059507	Lamc3	K06247	NA	laminin subunit gamma 3 [Source:RGD Symbol;Acc:1309399]	0.642198	0.669721	0.48091	1.12057	1.16744	1.51648	0.47124	-1.08547	down
ko04512	ECM-receptor interaction	8.16538e-08	ENSRNOG00000059894	Hmmr	K06267	NA	hyaluronan-mediated motility receptor [Source:RGD Symbol;Acc:2805]	3.30226	3.03812	3.39607	1.36581	1.12016	1.68154	2.33628	1.22421	up
ko04974	Protein digestion and absorption	1.07255e-07	ENSRNOG00000000463	Col11a2	K19721	NA	collagen type XI alpha 2 chain [Source:RGD Symbol;Acc:2373]	0.500326	1.10928	0.443421	1.4898	1.50536	1.91439	0.41817	-1.25784	down
ko04974	Protein digestion and absorption	1.07255e-07	ENSRNOG00000001249	Col6a1	K06238	NA	collagen type VI alpha 1 chain [Source:RGD Symbol;Acc:1565398]	133.697	116.137	100.859	46.125	44.8447	58.8249	2.34116	1.22722	up
ko04974	Protein digestion and absorption	1.07255e-07	ENSRNOG00000001254	Col6a2	K06238	NA	collagen type VI alpha 2 chain [Source:RGD Symbol;Acc:1305585]	151.096	132.236	115.094	51.6944	53.0243	62.9982	2.37559	1.24829	up
ko04974	Protein digestion and absorption	1.07255e-07	ENSRNOG00000001469	Eln	K14211	NA	elastin [Source:RGD Symbol;Acc:67394]	1000.53	1074.75	759.619	73.1078	65.5134	68.0227	13.7187	3.77807	up
ko04974	Protein digestion and absorption	1.07255e-07	ENSRNOG00000001492	Slc8a2	K05849	NA	solute carrier family 8 member A2 [Source:RGD Symbol;Acc:620194]	0.233813	0.256782	0.262259	0.0343693	0.0610045	0.134155	3.28	1.7137	up
ko04974	Protein digestion and absorption	1.07255e-07	ENSRNOG00000003357	Col3a1	K19720	NA	collagen type III alpha 1 chain [Source:RGD Symbol;Acc:71029]	773.166	628.281	469.974	156.474	148.568	159.465	4.02884	2.01036	up
ko04974	Protein digestion and absorption	1.07255e-07	ENSRNOG00000003736	Col5a2	K19721	NA	collagen type V alpha 2 chain [Source:RGD Symbol;Acc:70921]	97.1307	91.8408	82.7718	37.0816	38.9407	47.369	2.20229	1.139	up
ko04974	Protein digestion and absorption	1.07255e-07	ENSRNOG00000003897	Col1a1	NA	NA	collagen type I alpha 1 chain [Source:RGD Symbol;Acc:61817]	330.164	210.993	127.588	21.9343	20.0594	21.0288	10.6112	3.40752	up
ko04974	Protein digestion and absorption	1.07255e-07	ENSRNOG00000004009	Xpnpep2	K14208	EC:3.4.11.9	X-prolyl aminopeptidase 2 [Source:RGD Symbol;Acc:621277]	18.6505	24.1904	25.5114	40.7927	41.7445	62.8948	0.469994	-1.08928	down
ko04974	Protein digestion and absorption	1.07255e-07	ENSRNOG00000007290	Atp1a2	K01539	EC:7.2.2.13	ATPase Na+/K+ transporting subunit alpha 2 [Source:RGD Symbol;Acc:2168]	1.11361	2.2107	0.439613	6.71531	7.20043	7.69308	0.174185	-2.52131	down
ko04974	Protein digestion and absorption	1.07255e-07	ENSRNOG00000008749	Col5a1	K19721	NA	collagen type V alpha 1 chain [Source:RGD Symbol;Acc:70920]	26.8905	21.3001	17.3892	7.63965	8.60063	7.95309	2.71065	1.43864	up
ko04974	Protein digestion and absorption	1.07255e-07	ENSRNOG00000010935	Cpb2	K01300	EC:3.4.17.20	carboxypeptidase B2 [Source:RGD Symbol;Acc:71035]	0.66711	0.499583	0.757648	0.244928	0.291876	0.095584	3.04298	1.60548	up
ko04974	Protein digestion and absorption	1.07255e-07	ENSRNOG00000011181	Cpa3	K08780	EC:3.4.17.1	carboxypeptidase A3 [Source:RGD Symbol;Acc:2390]	47.1511	14.3733	13.2997	1.9191	1.45637	1.13267	16.5976	4.0529	up
ko04974	Protein digestion and absorption	1.07255e-07	ENSRNOG00000011292	NEWGENE_621351	K06236	NA	collagen, type I, alpha 2 [Source:RGD Symbol;Acc:9452897]	262.119	200.003	149.732	39.3449	35.4719	44.7937	5.11539	2.35484	up
ko04974	Protein digestion and absorption	1.07255e-07	ENSRNOG00000016281	Col4a1	K06237	NA	collagen type IV alpha 1 chain [Source:RGD Symbol;Acc:1307148]	228.604	293.978	253.367	78.1782	93.3833	113.433	2.72268	1.44503	up
ko04974	Protein digestion and absorption	1.07255e-07	ENSRNOG00000019648	AABR07068316	K06238	NA	collagen type VI alpha 3 chain [Source:NCBI gene;Acc:367313]	40.6971	40.1941	29.747	15.4429	18.342	18.1571	2.13003	1.09088	up
ko04974	Protein digestion and absorption	1.07255e-07	ENSRNOG00000020525	Col5a3	K19721	NA	collagen type V alpha 3 chain [Source:RGD Symbol;Acc:70922]	6.27947	4.20125	3.33351	1.45791	1.15799	1.30957	3.51913	1.81522	up
ko04974	Protein digestion and absorption	1.07255e-07	ENSRNOG00000020579	Col7a1	K16628	NA	collagen type VII alpha 1 chain [Source:RGD Symbol;Acc:1311417]	6.0876	5.0077	3.26195	1.88501	2.20626	1.57632	2.53322	1.34097	up
ko04974	Protein digestion and absorption	1.07255e-07	ENSRNOG00000021619	Cela3b	K01345	EC:3.4.21.70	chymotrypsin like elastase 3B [Source:RGD Symbol;Acc:1307819]	4.59201	1.0716	1.36544	0.246158	0.14853	0	17.8091	4.15455	up
ko04974	Protein digestion and absorption	1.07255e-07	ENSRNOG00000023148	Col11a1	K19721	NA	collagen type XI alpha 1 chain [Source:RGD Symbol;Acc:2372]	2.43824	0.601978	0.83106	0.137976	0.134476	0.179405	8.56748	3.09887	up
ko04974	Protein digestion and absorption	1.07255e-07	ENSRNOG00000023972	Col4a2	K06237	NA	collagen type IV alpha 2 chain [Source:RGD Symbol;Acc:1308085]	134.643	170.785	148.447	55.5573	64.3337	79.1798	2.27997	1.18901	up
ko04974	Protein digestion and absorption	1.07255e-07	ENSRNOG00000031782	Col6a4	K06238	NA	collagen, type VI, alpha 4 [Source:RGD Symbol;Acc:1564060]	1.63066	2.88537	1.2454	5.02547	6.16786	9.0251	0.284959	-1.81117	down
ko04974	Protein digestion and absorption	1.07255e-07	ENSRNOG00000039197	LOC108348074	K08135	NA	collagen alpha-1(XV) chain-like [Source:RGD Symbol;Acc:11464459]	12.5283	18.8748	22.1478	2.9943	2.28433	4.771	5.32864	2.41377	up
ko04974	Protein digestion and absorption	1.07255e-07	ENSRNOG00000052925	NEWGENE_621351	K06236	NA	collagen, type I, alpha 2 [Source:RGD Symbol;Acc:9452897]	98.967	66.7797	60.9449	18.46	15.0008	14.0315	4.77323	2.25497	up
ko04974	Protein digestion and absorption	1.07255e-07	ENSRNOG00000061939	LOC100911886	K19721	NA	collagen alpha-2(XI) chain-like [Source:RGD Symbol;Acc:6490199]	0.197345	0.288542	0.141454	0.328013	0.712663	0.588054	0.385172	-1.37643	down
ko04610	Complement and coagulation cascades	2.7221e-07	ENSRNOG00000001414	Serpine1	NA	NA	serpin family E member 1 [Source:RGD Symbol;Acc:3249]	55.409	67.7847	164.683	7.58747	10.5169	14.5605	8.81302	3.13964	up
ko04610	Complement and coagulation cascades	2.7221e-07	ENSRNOG00000001865	Serpind1	K03912	NA	serpin family D member 1 [Source:RGD Symbol;Acc:619854]	0.383391	0.380855	0.640925	2.14881	1.43236	1.31009	0.287282	-1.79946	down
ko04610	Complement and coagulation cascades	2.7221e-07	ENSRNOG00000002460	Serpinb2	K19821	NA	serpin family B member 2 [Source:RGD Symbol;Acc:621823]	0.101316	0.088103	1.2141	0.067856	0	0.028711	14.5341	3.86137	up
ko04610	Complement and coagulation cascades	2.7221e-07	ENSRNOG00000004062	C4bpa	K04002	NA	complement component 4 binding protein, alpha [Source:RGD Symbol;Acc:2235]	58.5906	39.8521	68.5658	25.9576	24.1979	21.7374	2.32302	1.216	up
ko04610	Complement and coagulation cascades	2.7221e-07	ENSRNOG00000004488	Bdkrb1	K03915	NA	bradykinin receptor B1 [Source:RGD Symbol;Acc:620401]	0.213898	0.179507	1.7444	0	0.153112	0.038042	11.1837	3.48332	up
ko04610	Complement and coagulation cascades	2.7221e-07	ENSRNOG00000010935	Cpb2	K01300	EC:3.4.17.20	carboxypeptidase B2 [Source:RGD Symbol;Acc:71035]	0.66711	0.499583	0.757648	0.244928	0.291876	0.095584	3.04298	1.60548	up
ko04610	Complement and coagulation cascades	2.7221e-07	ENSRNOG00000011706	Mbl1	K03991	NA	mannose-binding lectin (protein A) 1 [Source:RGD Symbol;Acc:3055]	2.56921	3.06382	2.73128	0.495776	1.10101	0.920711	3.32248	1.73226	up
ko04610	Complement and coagulation cascades	2.7221e-07	ENSRNOG00000011796	C1r	K01330	EC:3.4.21.41	complement C1r [Source:RGD Symbol;Acc:1309091]	123.094	95.9083	133.697	50.3805	41.8088	43.88	2.59206	1.3741	up
ko04610	Complement and coagulation cascades	2.7221e-07	ENSRNOG00000011800	F3	K03901	NA	coagulation factor III, tissue factor [Source:RGD Symbol;Acc:2587]	167.292	169.907	352.923	54.9981	53.3236	44.8062	4.50683	2.17211	up
ko04610	Complement and coagulation cascades	2.7221e-07	ENSRNOG00000011971	C1s	K01331	EC:3.4.21.42	complement C1s [Source:RGD Symbol;Acc:619983]	123.565	79.6933	122.779	33.0371	24.7081	21.0409	4.13826	2.04903	up
ko04610	Complement and coagulation cascades	2.7221e-07	ENSRNOG00000012749	C1qb	NA	NA	complement C1q B chain [Source:RGD Symbol;Acc:2229]	68.8056	59.044	60.4535	22.5219	17.5828	21.0046	3.08141	1.62359	up
ko04610	Complement and coagulation cascades	2.7221e-07	ENSRNOG00000012804	C1qc	K03988	NA	complement C1q C chain [Source:RGD Symbol;Acc:1306828]	74.9961	68.9488	69.0432	27.4504	22.6791	29.6529	2.66961	1.41663	up
ko04610	Complement and coagulation cascades	2.7221e-07	ENSRNOG00000012807	C1qa	K03986	NA	complement C1q A chain [Source:RGD Symbol;Acc:1306716]	101.115	87.5529	87.2321	25.1176	20.886	29.14	3.67164	1.87642	up
ko04610	Complement and coagulation cascades	2.7221e-07	ENSRNOG00000013736	C9	K04000	NA	complement C9 [Source:RGD Symbol;Acc:620319]	2.32761	1.63723	1.69646	0.095381	0.17503	0.090134	15.702	3.97288	up
ko04610	Complement and coagulation cascades	2.7221e-07	ENSRNOG00000028896	A2m	K03910	NA	alpha-2-macroglobulin-like [Source:RGD Symbol;Acc:6492449]	0.969297	0.540073	1.23508	0.200525	0.163322	0.066112	6.38305	2.67425	up
ko04610	Complement and coagulation cascades	2.7221e-07	ENSRNOG00000030387	Kng1	K03898	NA	kininogen 1 [Source:RGD Symbol;Acc:1359376]	21.2306	13.4328	16.0391	1.66566	2.34674	4.32674	6.08007	2.60409	up
ko04610	Complement and coagulation cascades	2.7221e-07	ENSRNOG00000033564	Cfd	K01334	EC:3.4.21.46	complement factor D [Source:RGD Symbol;Acc:2498]	19.8564	16.2343	14.3704	10.3933	4.70205	6.43942	2.34324	1.22851	up
ko04610	Complement and coagulation cascades	2.7221e-07	ENSRNOG00000034164	Cr2	K04012	NA	complement C3d receptor 2 [Source:RGD Symbol;Acc:1310065]	0.230317	0.706351	0.165545	1.71495	1.52249	1.68717	0.223817	-2.15961	down
ko04610	Complement and coagulation cascades	2.7221e-07	ENSRNOG00000037931	Plaur	K03985	NA	plasminogen activator, urokinase receptor [Source:RGD Symbol;Acc:620597]	21.8316	21.8635	26.0506	10.3191	10.6142	8.67513	2.3556	1.2361	up
ko04610	Complement and coagulation cascades	2.7221e-07	ENSRNOG00000045772	LOC100911545	K03910	NA	alpha-2-macroglobulin [Source:RGD Symbol;Acc:2004]	0.924814	0.42152	1.51115	0.255278	0.233575	0.071663	5.09795	2.34992	up
ko04610	Complement and coagulation cascades	2.7221e-07	ENSRNOG00000047657	C4a	K03989	NA	complement C4A [Source:RGD Symbol;Acc:620005]	237.873	241.958	309.397	129.43	75.4955	80.8113	2.76208	1.46576	up
ko04610	Complement and coagulation cascades	2.7221e-07	ENSRNOG00000053400	Cfi	K01333	EC:3.4.21.45	complement factor I [Source:RGD Symbol;Acc:620429]	20.1714	15.5898	19.2892	3.71338	3.97662	2.46643	5.42026	2.43836	up
ko05146	Amoebiasis	1.61782e-06	ENSRNOG00000002417	Serpinb10	K13963	NA	serpin family B member 10 [Source:RGD Symbol;Acc:628853]	3.3084	3.22071	3.53922	44.1892	26.7975	22.6285	0.10755	-3.21692	down
ko05146	Amoebiasis	1.61782e-06	ENSRNOG00000002418	Tgfb2	K13376	NA	transforming growth factor, beta 2 [Source:RGD Symbol;Acc:70491]	32.2616	34.4352	34.8496	12.3645	10.9716	12.4504	2.83756	1.50465	up
ko05146	Amoebiasis	1.61782e-06	ENSRNOG00000003357	Col3a1	K19720	NA	collagen type III alpha 1 chain [Source:RGD Symbol;Acc:71029]	773.166	628.281	469.974	156.474	148.568	159.465	4.02884	2.01036	up
ko05146	Amoebiasis	1.61782e-06	ENSRNOG00000003897	Col1a1	NA	NA	collagen type I alpha 1 chain [Source:RGD Symbol;Acc:61817]	330.164	210.993	127.588	21.9343	20.0594	21.0288	10.6112	3.40752	up
ko05146	Amoebiasis	1.61782e-06	ENSRNOG00000007468	Ifng	K04687	NA	interferon gamma [Source:RGD Symbol;Acc:2866]	0	0	0	0.111509	0.315579	0.259981	0.000436637	-11.1613	down
ko05146	Amoebiasis	1.61782e-06	ENSRNOG00000009867	Tgfb3	K13377	NA	transforming growth factor, beta 3 [Source:RGD Symbol;Acc:3851]	28.04	20.6768	22.6266	8.0599	7.08636	6.45932	3.30208	1.72338	up
ko05146	Amoebiasis	1.61782e-06	ENSRNOG00000010278	Il6	K05405	NA	interleukin 6 [Source:RGD Symbol;Acc:2901]	3.16485	2.11915	11.0231	0.116354	0.115796	0.224046	35.7458	5.1597	up
ko05146	Amoebiasis	1.61782e-06	ENSRNOG00000011292	NEWGENE_621351	K06236	NA	collagen, type I, alpha 2 [Source:RGD Symbol;Acc:9452897]	262.119	200.003	149.732	39.3449	35.4719	44.7937	5.11539	2.35484	up
ko05146	Amoebiasis	1.61782e-06	ENSRNOG00000013304	Arg1	K01476	EC:3.5.3.1	arginase 1 [Source:RGD Symbol;Acc:2150]	38.2968	26.0177	49.9768	14.1945	11.7175	9.74681	3.20513	1.68038	up
ko05146	Amoebiasis	1.61782e-06	ENSRNOG00000013736	C9	K04000	NA	complement C9 [Source:RGD Symbol;Acc:620319]	2.32761	1.63723	1.69646	0.095381	0.17503	0.090134	15.702	3.97288	up
ko05146	Amoebiasis	1.61782e-06	ENSRNOG00000014288	Fn1	K05717	NA	fibronectin 1 [Source:RGD Symbol;Acc:2624]	280.945	248.379	229.735	57.4707	64.5711	77.3481	3.80691	1.92862	up
ko05146	Amoebiasis	1.61782e-06	ENSRNOG00000016281	Col4a1	K06237	NA	collagen type IV alpha 1 chain [Source:RGD Symbol;Acc:1307148]	228.604	293.978	253.367	78.1782	93.3833	113.433	2.72268	1.44503	up
ko05146	Amoebiasis	1.61782e-06	ENSRNOG00000017237	Lama1	K05637	NA	laminin subunit alpha 1 [Source:RGD Symbol;Acc:1307207]	0.012656	0.0023	0.040977	0	0	0	186.443	7.54259	up
ko05146	Amoebiasis	1.61782e-06	ENSRNOG00000023972	Col4a2	K06237	NA	collagen type IV alpha 2 chain [Source:RGD Symbol;Acc:1308085]	134.643	170.785	148.447	55.5573	64.3337	79.1798	2.27997	1.18901	up
ko05146	Amoebiasis	1.61782e-06	ENSRNOG00000033119	Plcb4	K05858	EC:3.1.4.11	phospholipase C, beta 4 [Source:RGD Symbol;Acc:3345]	7.14989	7.94063	6.17429	13.1434	15.847	14.3553	0.490587	-1.02742	down
ko05146	Amoebiasis	1.61782e-06	ENSRNOG00000039754	Rab7b	K07898	NA	Rab7b, member RAS oncogene family [Source:RGD Symbol;Acc:1562617]	9.57892	7.52233	6.4956	3.07597	2.14929	2.00511	3.26357	1.70645	up
ko05146	Amoebiasis	1.61782e-06	ENSRNOG00000049096	Mcpt8l2	K01319	EC:3.4.21.20	mast cell protease 8-like 2 [Source:RGD Symbol;Acc:1302938]	19.7922	6.79392	4.06669	2.27301	0.99425	1.45419	6.49224	2.69872	up
ko05146	Amoebiasis	1.61782e-06	ENSRNOG00000049991	Mcpt8l3	K01319	EC:3.4.21.20	mast cell protease 8-like 3 [Source:RGD Symbol;Acc:1302975]	6.48812	1.91135	1.06625	0.881239	0.828065	0.794557	3.78045	1.91856	up
ko05146	Amoebiasis	1.61782e-06	ENSRNOG00000052925	NEWGENE_621351	K06236	NA	collagen, type I, alpha 2 [Source:RGD Symbol;Acc:9452897]	98.967	66.7797	60.9449	18.46	15.0008	14.0315	4.77323	2.25497	up
ko05146	Amoebiasis	1.61782e-06	ENSRNOG00000054371	Prkcg	K19663	EC:2.7.11.13	protein kinase C, gamma [Source:RGD Symbol;Acc:3397]	1.53377	1.93347	1.8286	3.48216	4.70262	3.15826	0.46688	-1.09888	down
ko05146	Amoebiasis	1.61782e-06	ENSRNOG00000056129	LOC102554659	K06247	NA	laminin subunit gamma-3-like [Source:RGD Symbol;Acc:7518353]	0.143205	0.092271	0.140703	0.320804	0.459925	0.441261	0.307841	-1.69974	down
ko05146	Amoebiasis	1.61782e-06	ENSRNOG00000056756	Actn1	K05699	NA	actinin, alpha 1 [Source:RGD Symbol;Acc:70907]	53.4333	54.3079	64.5786	24.6416	28.3915	29.6839	2.08324	1.05883	up
ko05146	Amoebiasis	1.61782e-06	ENSRNOG00000059479	Adcy1	K08041	EC:4.6.1.1	adenylate cyclase 1 [Source:RGD Symbol;Acc:1309318]	0.206208	0.356452	0.124273	1.28217	1.19576	1.45355	0.174726	-2.51683	down
ko05146	Amoebiasis	1.61782e-06	ENSRNOG00000059507	Lamc3	K06247	NA	laminin subunit gamma 3 [Source:RGD Symbol;Acc:1309399]	0.642198	0.669721	0.48091	1.12057	1.16744	1.51648	0.47124	-1.08547	down
ko05150	Staphylococcus aureus infection	2.1591e-05	ENSRNOG00000002794	Selp	K06496	NA	selectin P [Source:RGD Symbol;Acc:3656]	3.596	2.43421	6.01392	1.27506	1.4035	1.324	3.0091	1.58933	up
ko05150	Staphylococcus aureus infection	2.1591e-05	ENSRNOG00000011706	Mbl1	K03991	NA	mannose-binding lectin (protein A) 1 [Source:RGD Symbol;Acc:3055]	2.56921	3.06382	2.73128	0.495776	1.10101	0.920711	3.32248	1.73226	up
ko05150	Staphylococcus aureus infection	2.1591e-05	ENSRNOG00000011796	C1r	K01330	EC:3.4.21.41	complement C1r [Source:RGD Symbol;Acc:1309091]	123.094	95.9083	133.697	50.3805	41.8088	43.88	2.59206	1.3741	up
ko05150	Staphylococcus aureus infection	2.1591e-05	ENSRNOG00000011971	C1s	K01331	EC:3.4.21.42	complement C1s [Source:RGD Symbol;Acc:619983]	123.565	79.6933	122.779	33.0371	24.7081	21.0409	4.13826	2.04903	up
ko05150	Staphylococcus aureus infection	2.1591e-05	ENSRNOG00000012749	C1qb	NA	NA	complement C1q B chain [Source:RGD Symbol;Acc:2229]	68.8056	59.044	60.4535	22.5219	17.5828	21.0046	3.08141	1.62359	up
ko05150	Staphylococcus aureus infection	2.1591e-05	ENSRNOG00000012804	C1qc	K03988	NA	complement C1q C chain [Source:RGD Symbol;Acc:1306828]	74.9961	68.9488	69.0432	27.4504	22.6791	29.6529	2.66961	1.41663	up
ko05150	Staphylococcus aureus infection	2.1591e-05	ENSRNOG00000012807	C1qa	K03986	NA	complement C1q A chain [Source:RGD Symbol;Acc:1306716]	101.115	87.5529	87.2321	25.1176	20.886	29.14	3.67164	1.87642	up
ko05150	Staphylococcus aureus infection	2.1591e-05	ENSRNOG00000013231	Ptafr	K04279	NA	platelet-activating factor receptor [Source:RGD Symbol;Acc:61897]	11.0138	10.7414	8.49307	4.64952	3.76824	5.12655	2.23329	1.15917	up
ko05150	Staphylococcus aureus infection	2.1591e-05	ENSRNOG00000020733	Camp	K13916	NA	cathelicidin antimicrobial peptide [Source:RGD Symbol;Acc:1559878]	1.35987	0.998778	1.40631	2.74325	2.92398	3.19669	0.42475	-1.23531	down
ko05150	Staphylococcus aureus infection	2.1591e-05	ENSRNOG00000027855	Fcar	K06513	NA	Fc fragment of IgA receptor [Source:RGD Symbol;Acc:1303082]	0.616979	0.670065	0.480905	1.05645	0.909993	1.64307	0.489803	-1.02973	down
ko05150	Staphylococcus aureus infection	2.1591e-05	ENSRNOG00000030093	Defa5	K05230	NA	defensin alpha 5 [Source:RGD Symbol;Acc:727951]	0.31484	0	0.247739	1.65831	1.40795	1.09822	0.13509	-2.88801	down
ko05150	Staphylococcus aureus infection	2.1591e-05	ENSRNOG00000033564	Cfd	K01334	EC:3.4.21.46	complement factor D [Source:RGD Symbol;Acc:2498]	19.8564	16.2343	14.3704	10.3933	4.70205	6.43942	2.34324	1.22851	up
ko05150	Staphylococcus aureus infection	2.1591e-05	ENSRNOG00000038135	RatNP-3b	K05230	NA	defensin RatNP-3 precursor [Source:RGD Symbol;Acc:1589653]	0.298655	0	0.104052	0.904851	0.837612	1.46829	0.125424	-2.99511	down
ko05150	Staphylococcus aureus infection	2.1591e-05	ENSRNOG00000047657	C4a	K03989	NA	complement C4A [Source:RGD Symbol;Acc:620005]	237.873	241.958	309.397	129.43	75.4955	80.8113	2.76208	1.46576	up
ko05150	Staphylococcus aureus infection	2.1591e-05	ENSRNOG00000047864	LOC108348072	K06752	NA	RT1 class II, locus DMa [Source:RGD Symbol;Acc:735053]	18.1206	19.1445	16.0483	10.0005	6.31184	7.37897	2.25034	1.17014	up
ko05150	Staphylococcus aureus infection	2.1591e-05	ENSRNOG00000053400	Cfi	K01333	EC:3.4.21.45	complement factor I [Source:RGD Symbol;Acc:620429]	20.1714	15.5898	19.2892	3.71338	3.97662	2.46643	5.42026	2.43836	up
ko05410	Hypertrophic cardiomyopathy (HCM)	0.000120096	ENSRNOG00000002418	Tgfb2	K13376	NA	transforming growth factor, beta 2 [Source:RGD Symbol;Acc:70491]	32.2616	34.4352	34.8496	12.3645	10.9716	12.4504	2.83756	1.50465	up
ko05410	Hypertrophic cardiomyopathy (HCM)	0.000120096	ENSRNOG00000003245	Cacng1	NA	NA	calcium voltage-gated channel auxiliary subunit gamma 1 [Source:RGD Symbol;Acc:2249]	0.342541	0.070667	0.216756	0.041472	0	0	15.1901	3.92506	up
ko05410	Hypertrophic cardiomyopathy (HCM)	0.000120096	ENSRNOG00000003998	Sgca	K12565	NA	sarcoglycan, alpha [Source:RGD Symbol;Acc:1308062]	2.86595	3.15146	2.51249	0.916284	2.09906	1.11714	2.06411	1.04552	up
ko05410	Hypertrophic cardiomyopathy (HCM)	0.000120096	ENSRNOG00000006569	Itgb8	K06591	NA	integrin subunit beta 8 [Source:RGD Symbol;Acc:1311374]	2.69064	1.81036	3.42008	1.06221	1.22856	0.71459	2.63565	1.39816	up
ko05410	Hypertrophic cardiomyopathy (HCM)	0.000120096	ENSRNOG00000006723	Itga11	K06587	NA	integrin subunit alpha 11 [Source:RGD Symbol;Acc:1311711]	2.02577	0.948998	1.43154	0.445333	0.566447	0.898136	2.30707	1.20606	up
ko05410	Hypertrophic cardiomyopathy (HCM)	0.000120096	ENSRNOG00000007467	Ace3	K01283	EC:3.4.15.1	angiotensin I converting enzyme (peptidyl-dipeptidase A) 3 [Source:RGD Symbol;Acc:1561299]	0.356023	1.00323	0.275359	2.20798	2.82272	2.16244	0.227246	-2.13767	down
ko05410	Hypertrophic cardiomyopathy (HCM)	0.000120096	ENSRNOG00000007666	Cacnb4	K04865	NA	calcium voltage-gated channel auxiliary subunit beta 4 [Source:RGD Symbol;Acc:68385]	0.231166	0.227915	0.115713	0.714819	1.19904	0.551053	0.23319	-2.10042	down
ko05410	Hypertrophic cardiomyopathy (HCM)	0.000120096	ENSRNOG00000008536	Actc1	NA	NA	actin, alpha, cardiac muscle 1 [Source:RGD Symbol;Acc:2026]	37.3836	38.0183	33.7249	14.0479	7.50795	11.0879	3.34296	1.74112	up
ko05410	Hypertrophic cardiomyopathy (HCM)	0.000120096	ENSRNOG00000009867	Tgfb3	K13377	NA	transforming growth factor, beta 3 [Source:RGD Symbol;Acc:3851]	28.04	20.6768	22.6266	8.0599	7.08636	6.45932	3.30208	1.72338	up
ko05410	Hypertrophic cardiomyopathy (HCM)	0.000120096	ENSRNOG00000010278	Il6	K05405	NA	interleukin 6 [Source:RGD Symbol;Acc:2901]	3.16485	2.11915	11.0231	0.116354	0.115796	0.224046	35.7458	5.1597	up
ko05410	Hypertrophic cardiomyopathy (HCM)	0.000120096	ENSRNOG00000012307	Mybpc3	K12568	NA	myosin binding protein C, cardiac [Source:RGD Symbol;Acc:1305950]	0.049032	0.067742	0.063231	0.968177	0.07676	0.44193	0.121063	-3.04617	down
ko05410	Hypertrophic cardiomyopathy (HCM)	0.000120096	ENSRNOG00000014603	Sgcg	K12564	NA	sarcoglycan, gamma [Source:RGD Symbol;Acc:1359577]	13.5611	9.46866	11.7961	1.57006	3.5042	3.33878	4.13951	2.04946	up
ko05410	Hypertrophic cardiomyopathy (HCM)	0.000120096	ENSRNOG00000016731	Tpm2	K10374	NA	tropomyosin 2 [Source:RGD Symbol;Acc:1559479]	130.596	119.409	127.205	32.1348	33.0202	37.6343	3.66974	1.87568	up
ko05410	Hypertrophic cardiomyopathy (HCM)	0.000120096	ENSRNOG00000016983	Myh7	K17751	NA	myosin heavy chain 7 [Source:RGD Symbol;Acc:62030]	0	0.002143	0	0.338331	0.00473	0.074469	0.00513257	-7.6061	down
ko05410	Hypertrophic cardiomyopathy (HCM)	0.000120096	ENSRNOG00000019810	Des	K07610	NA	desmin [Source:RGD Symbol;Acc:620686]	92.8023	102.513	108.876	30.2923	29.057	31.5052	3.34812	1.74335	up
ko05410	Hypertrophic cardiomyopathy (HCM)	0.000120096	ENSRNOG00000025757	Myh6	NA	NA	myosin heavy chain 6 [Source:RGD Symbol;Acc:62029]	0	0.014741	0.007949	5.02898	0.023107	2.7062	0.00292461	-8.41754	down
ko05410	Hypertrophic cardiomyopathy (HCM)	0.000120096	ENSRNOG00000054274	Cacnb3	NA	NA	calcium voltage-gated channel auxiliary subunit beta 3 [Source:RGD Symbol;Acc:2248]	12.6099	10.2322	7.67604	5.49561	3.55387	4.34237	2.27886	1.18831	up
ko05410	Hypertrophic cardiomyopathy (HCM)	0.000120096	ENSRNOG00000058111	Itga2	K06481	NA	integrin subunit alpha 2 [Source:RGD Symbol;Acc:621632]	2.02287	2.41017	1.73864	0.541871	0.886078	0.645843	2.97604	1.57339	up
ko05410	Hypertrophic cardiomyopathy (HCM)	0.000120096	ENSRNOG00000062101	Ace	K01283	EC:3.4.15.1	angiotensin I converting enzyme [Source:RGD Symbol;Acc:2493]	116.54	162.976	113.041	251.855	283.285	379.239	0.429316	-1.21989	down
ko04080	Neuroactive ligand-receptor interaction	0.00013385	ENSRNOG00000003442	Adora1	NA	NA	adenosine A1 receptor [Source:RGD Symbol;Acc:2048]	2.22958	2.85704	1.93044	0.530347	0.128806	0.423696	6.48019	2.69604	up
ko04080	Neuroactive ligand-receptor interaction	0.00013385	ENSRNOG00000004400	Avpr1a	K04226	NA	arginine vasopressin receptor 1A [Source:RGD Symbol;Acc:2185]	0.884247	0.991065	0.583946	2.30329	2.28827	2.50882	0.346356	-1.52967	down
ko04080	Neuroactive ligand-receptor interaction	0.00013385	ENSRNOG00000004404	Tac4	K05241	NA	tachykinin 4 [Source:RGD Symbol;Acc:628842]	5.30119	5.34132	4.09235	0.769295	0.661404	0.350317	8.27329	3.04846	up
ko04080	Neuroactive ligand-receptor interaction	0.00013385	ENSRNOG00000004488	Bdkrb1	K03915	NA	bradykinin receptor B1 [Source:RGD Symbol;Acc:620401]	0.213898	0.179507	1.7444	0	0.153112	0.038042	11.1837	3.48332	up
ko04080	Neuroactive ligand-receptor interaction	0.00013385	ENSRNOG00000004641	Sstr4	K04220	NA	somatostatin receptor 4 [Source:RGD Symbol;Acc:3764]	4.35857	4.697	2.99517	7.81727	5.98183	11.5699	0.475019	-1.07394	down
ko04080	Neuroactive ligand-receptor interaction	0.00013385	ENSRNOG00000005370	S1pr4	K04293	NA	sphingosine-1-phosphate receptor 4 [Source:RGD Symbol;Acc:1304801]	4.28814	4.99459	2.38803	7.72174	10.0489	8.44379	0.445203	-1.16746	down
ko04080	Neuroactive ligand-receptor interaction	0.00013385	ENSRNOG00000005519	Grm3	K04605	NA	glutamate metabotropic receptor 3 [Source:RGD Symbol;Acc:2744]	1.19676	1.61378	0.921182	0.377273	0.291303	0.740839	2.64771	1.40475	up
ko04080	Neuroactive ligand-receptor interaction	0.00013385	ENSRNOG00000005723	Grin3a	K05213	NA	glutamate ionotropic receptor NMDA type subunit 3A [Source:RGD Symbol;Acc:621704]	0.246836	0.126828	0.17107	0	0	0	1815.78	10.8264	up
ko04080	Neuroactive ligand-receptor interaction	0.00013385	ENSRNOG00000005853	Tacr1	K04222	NA	tachykinin receptor 1 [Source:RGD Symbol;Acc:3811]	0.962161	0.32157	1.14445	0	0.068343	0	35.5293	5.15094	up
ko04080	Neuroactive ligand-receptor interaction	0.00013385	ENSRNOG00000007374	Tac1	K05239	NA	tachykinin, precursor 1 [Source:RGD Symbol;Acc:3807]	0.715164	0.85091	1.28238	3.61698	2.4429	1.33902	0.384984	-1.37713	down
ko04080	Neuroactive ligand-receptor interaction	0.00013385	ENSRNOG00000008223	Cnr1	K04277	NA	cannabinoid receptor 1 [Source:RGD Symbol;Acc:2369]	1.5166	1.73802	1.62987	3.34558	5.79038	5.24774	0.339586	-1.55815	down
ko04080	Neuroactive ligand-receptor interaction	0.00013385	ENSRNOG00000009522	Adra1a	NA	NA	adrenoceptor alpha 1A [Source:RGD Symbol;Acc:2055]	0.443506	0.522418	0.301567	0.884054	1.07486	0.934857	0.438007	-1.19097	down
ko04080	Neuroactive ligand-receptor interaction	0.00013385	ENSRNOG00000009768	LOC100912228	NA	NA	pro-neuropeptide Y-like [Source:RGD Symbol;Acc:6487865]	5.52974	7.0638	11.5309	19.3687	12.1043	22.9197	0.443523	-1.17292	down
ko04080	Neuroactive ligand-receptor interaction	0.00013385	ENSRNOG00000010053	Calcr	K04576	NA	calcitonin receptor [Source:RGD Symbol;Acc:621001]	0.034106	0.112382	0.012473	0	0	0	529.87	9.04949	up
ko04080	Neuroactive ligand-receptor interaction	0.00013385	ENSRNOG00000010603	Gzma	K01352	EC:3.4.21.78	granzyme A [Source:RGD Symbol;Acc:628640]	8.62104	9.97781	4.87209	37.3725	72.5884	41.9582	0.154496	-2.69436	down
ko04080	Neuroactive ligand-receptor interaction	0.00013385	ENSRNOG00000011074	Calcb	K12332	NA	calcitonin-related polypeptide, beta [Source:RGD Symbol;Acc:620997]	1.83807	1.04867	0.913895	0.138678	0	0.047576	20.4057	4.3509	up
ko04080	Neuroactive ligand-receptor interaction	0.00013385	ENSRNOG00000011130	Calca	K12332	NA	calcitonin-related polypeptide alpha [Source:RGD Symbol;Acc:2254]	0.0864105	0.283044	0.149482	0.762545	1.17682	1.38808	0.155957	-2.68078	down
ko04080	Neuroactive ligand-receptor interaction	0.00013385	ENSRNOG00000011202	Chrna4	K04806	NA	cholinergic receptor nicotinic alpha 4 subunit [Source:RGD Symbol;Acc:2346]	0.0771047	0.0859449	0.0798405	0.579064	0.546145	0.315917	0.168542	-2.56882	down
ko04080	Neuroactive ligand-receptor interaction	0.00013385	ENSRNOG00000011824	Trh	K05253	NA	thyrotropin releasing hormone [Source:RGD Symbol;Acc:3903]	11.4467	6.09187	3.74237	0.058091	0	0.036293	225.472	7.8168	up
ko04080	Neuroactive ligand-receptor interaction	0.00013385	ENSRNOG00000012674	Adrb3	K04143	NA	adrenoceptor beta 3 [Source:RGD Symbol;Acc:2061]	0.121313	0.023431	0.203623	0	0	0	1161.22	10.1814	up
ko04080	Neuroactive ligand-receptor interaction	0.00013385	ENSRNOG00000013231	Ptafr	K04279	NA	platelet-activating factor receptor [Source:RGD Symbol;Acc:61897]	11.0138	10.7414	8.49307	4.64952	3.76824	5.12655	2.23329	1.15917	up
ko04080	Neuroactive ligand-receptor interaction	0.00013385	ENSRNOG00000014149	Npy1r	NA	NA	neuropeptide Y receptor Y1 [Source:RGD Symbol;Acc:3198]	0	0	0	0.222327	0.145005	0.166436	0.000562042	-10.797	down
ko04080	Neuroactive ligand-receptor interaction	0.00013385	ENSRNOG00000014290	Grm1	K04603	NA	glutamate metabotropic receptor 1 [Source:RGD Symbol;Acc:2742]	0.009912	0	0.015688	0.069331	0.104979	0.0226431	0.12998	-2.94364	down
ko04080	Neuroactive ligand-receptor interaction	0.00013385	ENSRNOG00000015156	Gal	NA	NA	galanin and GMAP prepropeptide [Source:RGD Symbol;Acc:61954]	3.00749	6.39934	1.08286	0.483463	1.01067	0.118952	6.50286	2.70107	up
ko04080	Neuroactive ligand-receptor interaction	0.00013385	ENSRNOG00000015260	Lpar3	K04294	NA	lysophosphatidic acid receptor 3 [Source:RGD Symbol;Acc:620565]	4.46911	5.9081	4.11901	16.6929	15.1815	12.4222	0.327254	-1.61152	down
ko04080	Neuroactive ligand-receptor interaction	0.00013385	ENSRNOG00000015788	Adora3	K04268	NA	adenosine receptor A3-like [Source:RGD Symbol;Acc:6491091]	0.981793	0.693858	1.55777	0.343286	0.434004	0.264949	3.10238	1.63338	up
ko04080	Neuroactive ligand-receptor interaction	0.00013385	ENSRNOG00000016685	Mc5r	K04203	NA	melanocortin 5 receptor [Source:RGD Symbol;Acc:3058]	0.309953	0.502618	0.655511	0.033918	0.163002	0.138928	4.37127	2.12805	up
ko04080	Neuroactive ligand-receptor interaction	0.00013385	ENSRNOG00000016887	Hrh4	K04152	NA	histamine receptor H4 [Source:RGD Symbol;Acc:620631]	0.195294	0.196548	0.02878	0	0	0	1402.07	10.4533	up
ko04080	Neuroactive ligand-receptor interaction	0.00013385	ENSRNOG00000017759	Ucn3	K05257	NA	urocortin 3 [Source:RGD Symbol;Acc:1562213]	0.069837	0.271317	0.666331	0	0	0	3358.28	11.7135	up
ko04080	Neuroactive ligand-receptor interaction	0.00013385	ENSRNOG00000017873	Sct	K05263	NA	secretin [Source:RGD Symbol;Acc:3643]	2.3567	3.70786	3.37265	0.308273	0.702983	0.388027	6.74431	2.75367	up
ko04080	Neuroactive ligand-receptor interaction	0.00013385	ENSRNOG00000018827	LOC103694905	K04163	NA	5-hydroxytryptamine receptor 7 [Source:RGD Symbol;Acc:9265298]	0.601136	0.302224	0.67299	0.12608	0.271302	0.0872331	3.25279	1.70168	up
ko04080	Neuroactive ligand-receptor interaction	0.00013385	ENSRNOG00000019270	P2ry6	K04272	NA	pyrimidinergic receptor P2Y6 [Source:RGD Symbol;Acc:620269]	4.58353	4.02383	4.23688	1.28928	1.36146	1.89351	2.82648	1.49901	up
ko04080	Neuroactive ligand-receptor interaction	0.00013385	ENSRNOG00000020901	S1pr5	K04295	NA	sphingosine-1-phosphate receptor 5 [Source:RGD Symbol;Acc:620566]	1.79483	2.09013	0.765311	6.22649	10.6507	5.08636	0.211726	-2.23973	down
ko04080	Neuroactive ligand-receptor interaction	0.00013385	ENSRNOG00000020948	Pth1r	K04585	NA	parathyroid hormone 1 receptor [Source:RGD Symbol;Acc:3442]	8.63491	9.04509	5.00246	3.75007	3.62401	3.48961	2.08792	1.06206	up
ko04080	Neuroactive ligand-receptor interaction	0.00013385	ENSRNOG00000023664	Lepr	K05062	NA	leptin receptor [Source:RGD Symbol;Acc:3001]	1.64218	1.61979	1.27077	3.58304	4.59652	3.2965	0.394973	-1.34017	down
ko04080	Neuroactive ligand-receptor interaction	0.00013385	ENSRNOG00000027060	Galr3	K04232	NA	galanin receptor 3 [Source:RGD Symbol;Acc:2658]	0.295603	0.37482	0.596795	0.083968	0.075174	0	7.96281	2.99328	up
ko04080	Neuroactive ligand-receptor interaction	0.00013385	ENSRNOG00000030387	Kng1	K03898	NA	kininogen 1 [Source:RGD Symbol;Acc:1359376]	21.2306	13.4328	16.0391	1.66566	2.34674	4.32674	6.08007	2.60409	up
ko04080	Neuroactive ligand-receptor interaction	0.00013385	ENSRNOG00000032417	Gabrp	K05189	NA	gamma-aminobutyric acid type A receptor pi subunit [Source:RGD Symbol;Acc:620532]	3.74924	2.43961	2.02034	0.092348	0.19525	0.36241	12.6294	3.65871	up
ko04080	Neuroactive ligand-receptor interaction	0.00013385	ENSRNOG00000036685	Npb	K05267	NA	neuropeptide B [Source:RGD Symbol;Acc:708513]	4.21014	3.5521	5.03871	0.877082	0.475219	1.03771	5.35602	2.42116	up
ko04080	Neuroactive ligand-receptor interaction	0.00013385	ENSRNOG00000036692	Gcgr	K04583	NA	glucagon receptor [Source:RGD Symbol;Acc:2669]	2.41681	1.45819	0.552288	0.344226	0.244353	0.271724	5.1462	2.36351	up
ko04080	Neuroactive ligand-receptor interaction	0.00013385	ENSRNOG00000037839	P2ry10	K04274	NA	P2Y receptor family member 10 [Source:RGD Symbol;Acc:1561912]	3.24316	2.41494	2.67275	9.42408	11.0983	6.70997	0.305917	-1.70879	down
ko04080	Neuroactive ligand-receptor interaction	0.00013385	ENSRNOG00000046449	Npy	K05232	NA	neuropeptide Y [Source:RGD Symbol;Acc:3197]	5.83501	7.53937	12.3021	20.7918	13.0994	24.5613	0.43927	-1.18682	down
ko04080	Neuroactive ligand-receptor interaction	0.00013385	ENSRNOG00000048145	Sstr1	K04217	NA	somatostatin receptor 1 [Source:RGD Symbol;Acc:3762]	0.145416	0.387908	0.213102	1.29021	1.61171	1.86831	0.156476	-2.67599	down
ko04080	Neuroactive ligand-receptor interaction	0.00013385	ENSRNOG00000049096	Mcpt8l2	K01319	EC:3.4.21.20	mast cell protease 8-like 2 [Source:RGD Symbol;Acc:1302938]	19.7922	6.79392	4.06669	2.27301	0.99425	1.45419	6.49224	2.69872	up
ko04080	Neuroactive ligand-receptor interaction	0.00013385	ENSRNOG00000049991	Mcpt8l3	K01319	EC:3.4.21.20	mast cell protease 8-like 3 [Source:RGD Symbol;Acc:1302975]	6.48812	1.91135	1.06625	0.881239	0.828065	0.794557	3.78045	1.91856	up
ko04080	Neuroactive ligand-receptor interaction	0.00013385	ENSRNOG00000050743	LOC100911796	K04268	NA	adenosine A3 receptor [Source:RGD Symbol;Acc:2051]	0.956667	0.670742	1.53251	0.339604	0.292693	0.26951	3.50399	1.809	up
ko05144	Malaria	0.000237452	ENSRNOG00000002418	Tgfb2	K13376	NA	transforming growth factor, beta 2 [Source:RGD Symbol;Acc:70491]	32.2616	34.4352	34.8496	12.3645	10.9716	12.4504	2.83756	1.50465	up
ko05144	Malaria	0.000237452	ENSRNOG00000002723	Sele	K06494	NA	selectin E [Source:RGD Symbol;Acc:3654]	2.98187	1.19921	3.6168	0.289072	0.400788	0.3301	7.64528	2.93457	up
ko05144	Malaria	0.000237452	ENSRNOG00000002794	Selp	K06496	NA	selectin P [Source:RGD Symbol;Acc:3656]	3.596	2.43421	6.01392	1.27506	1.4035	1.324	3.0091	1.58933	up
ko05144	Malaria	0.000237452	ENSRNOG00000007159	Ccl2	K14624	NA	C-C motif chemokine ligand 2 [Source:RGD Symbol;Acc:3645]	37.7066	18.9936	41.8423	1.20024	1.4775	2.90705	17.6448	4.14117	up
ko05144	Malaria	0.000237452	ENSRNOG00000007310	Klrb1b	K06543	NA	killer cell lectin-like receptor subfamily B, member 1A [Source:RGD Symbol;Acc:1586149]	2.14455	2.25501	1.53234	5.65662	8.09993	5.18838	0.313113	-1.67524	down
ko05144	Malaria	0.000237452	ENSRNOG00000007468	Ifng	K04687	NA	interferon gamma [Source:RGD Symbol;Acc:2866]	0	0	0	0.111509	0.315579	0.259981	0.000436637	-11.1613	down
ko05144	Malaria	0.000237452	ENSRNOG00000007811	Klrb1c	K06543	NA	killer cell lectin-like receptor subfamily B member 1C [Source:RGD Symbol;Acc:1583336]	0.990474	1.01553	0.280973	3.16444	5.81491	2.6562	0.196551	-2.34703	down
ko05144	Malaria	0.000237452	ENSRNOG00000009867	Tgfb3	K13377	NA	transforming growth factor, beta 3 [Source:RGD Symbol;Acc:3851]	28.04	20.6768	22.6266	8.0599	7.08636	6.45932	3.30208	1.72338	up
ko05144	Malaria	0.000237452	ENSRNOG00000010278	Il6	K05405	NA	interleukin 6 [Source:RGD Symbol;Acc:2901]	3.16485	2.11915	11.0231	0.116354	0.115796	0.224046	35.7458	5.1597	up
ko05144	Malaria	0.000237452	ENSRNOG00000010529	Thbs2	K04659	NA	thrombospondin 2 [Source:RGD Symbol;Acc:1310979]	16.9175	9.7328	15.9974	0.842375	0.59486	0.649489	20.4376	4.35316	up
ko05144	Malaria	0.000237452	ENSRNOG00000029768	Ccl12	K14624	NA	chemokine (C-C motif) ligand 12 [Source:RGD Symbol;Acc:1309255]	6.0007	2.47451	2.57848	0	0.075135	0.603588	16.286	4.02556	up
ko05144	Malaria	0.000237452	ENSRNOG00000045829	Thbs1	K16857	NA	thrombospondin 1 [Source:RGD Symbol;Acc:1588455]	69.4641	106.372	164.303	19.9347	19.858	26.7682	5.11019	2.35338	up
ko05144	Malaria	0.000237452	ENSRNOG00000061739	Klrk1	K06728	NA	killer cell lectin like receptor K1 [Source:RGD Symbol;Acc:3180]	6.32432	4.17684	4.30792	9.34371	16.153	12.7948	0.386746	-1.37054	down
ko04510	Focal adhesion	0.000281466	ENSRNOG00000001249	Col6a1	K06238	NA	collagen type VI alpha 1 chain [Source:RGD Symbol;Acc:1565398]	133.697	116.137	100.859	46.125	44.8447	58.8249	2.34116	1.22722	up
ko04510	Focal adhesion	0.000281466	ENSRNOG00000001254	Col6a2	K06238	NA	collagen type VI alpha 2 chain [Source:RGD Symbol;Acc:1305585]	151.096	132.236	115.094	51.6944	53.0243	62.9982	2.37559	1.24829	up
ko04510	Focal adhesion	0.000281466	ENSRNOG00000002158	Ibsp	K06253	NA	integrin-binding sialoprotein [Source:RGD Symbol;Acc:2855]	2.52661	2.01495	2.65804	0.518978	0.429105	0.498763	4.97606	2.315	up
ko04510	Focal adhesion	0.000281466	ENSRNOG00000002244	Pdgfra	K04363	EC:2.7.10.1	platelet derived growth factor receptor alpha [Source:RGD Symbol;Acc:3284]	10.7913	10.4928	10.1398	22.5292	21.8926	24.1598	0.458196	-1.12596	down
ko04510	Focal adhesion	0.000281466	ENSRNOG00000002548	Tnn	K06252	NA	tenascin N [Source:RGD Symbol;Acc:1306002]	3.51992	0.787354	1.0593	0.259756	0.338104	0.237335	6.42553	2.68382	up
ko04510	Focal adhesion	0.000281466	ENSRNOG00000003897	Col1a1	NA	NA	collagen type I alpha 1 chain [Source:RGD Symbol;Acc:61817]	330.164	210.993	127.588	21.9343	20.0594	21.0288	10.6112	3.40752	up
ko04510	Focal adhesion	0.000281466	ENSRNOG00000005650	Pgf	K16859	NA	placental growth factor [Source:RGD Symbol;Acc:619850]	4.74821	4.86013	6.89225	1.81335	1.74628	1.74662	3.10965	1.63675	up
ko04510	Focal adhesion	0.000281466	ENSRNOG00000006569	Itgb8	K06591	NA	integrin subunit beta 8 [Source:RGD Symbol;Acc:1311374]	2.69064	1.81036	3.42008	1.06221	1.22856	0.71459	2.63565	1.39816	up
ko04510	Focal adhesion	0.000281466	ENSRNOG00000006723	Itga11	K06587	NA	integrin subunit alpha 11 [Source:RGD Symbol;Acc:1311711]	2.02577	0.948998	1.43154	0.445333	0.566447	0.898136	2.30707	1.20606	up
ko04510	Focal adhesion	0.000281466	ENSRNOG00000008030	Shc2	K17447	NA	SHC adaptor protein 2 [Source:RGD Symbol;Acc:1307137]	1.08558	1.2228	0.495709	1.31078	2.86654	1.98796	0.45482	-1.13663	down
ko04510	Focal adhesion	0.000281466	ENSRNOG00000010529	Thbs2	K04659	NA	thrombospondin 2 [Source:RGD Symbol;Acc:1310979]	16.9175	9.7328	15.9974	0.842375	0.59486	0.649489	20.4376	4.35316	up
ko04510	Focal adhesion	0.000281466	ENSRNOG00000011292	NEWGENE_621351	K06236	NA	collagen, type I, alpha 2 [Source:RGD Symbol;Acc:9452897]	262.119	200.003	149.732	39.3449	35.4719	44.7937	5.11539	2.35484	up
ko04510	Focal adhesion	0.000281466	ENSRNOG00000014288	Fn1	K05717	NA	fibronectin 1 [Source:RGD Symbol;Acc:2624]	280.945	248.379	229.735	57.4707	64.5711	77.3481	3.80691	1.92862	up
ko04510	Focal adhesion	0.000281466	ENSRNOG00000014409	Myl7	K12754	NA	myosin light chain 7 [Source:RGD Symbol;Acc:1308262]	0.119219	0.0167495	0.0100427	5.72545	0.117447	1.76474	0.0191928	-5.70329	down
ko04510	Focal adhesion	0.000281466	ENSRNOG00000016281	Col4a1	K06237	NA	collagen type IV alpha 1 chain [Source:RGD Symbol;Acc:1307148]	228.604	293.978	253.367	78.1782	93.3833	113.433	2.72268	1.44503	up
ko04510	Focal adhesion	0.000281466	ENSRNOG00000017237	Lama1	K05637	NA	laminin subunit alpha 1 [Source:RGD Symbol;Acc:1307207]	0.012656	0.0023	0.040977	0	0	0	186.443	7.54259	up
ko04510	Focal adhesion	0.000281466	ENSRNOG00000017645	Mylpf	K12758	NA	myosin light chain, phosphorylatable, fast skeletal muscle [Source:RGD Symbol;Acc:3141]	2.23646	2.79222	1.58914	5.37923	8.99875	4.30547	0.354207	-1.49733	down
ko04510	Focal adhesion	0.000281466	ENSRNOG00000018461	Pdgfrb	NA	NA	platelet derived growth factor receptor beta [Source:RGD Symbol;Acc:3285]	29.9477	33.1625	27.8463	12.2108	11.6934	13.6546	2.42171	1.27603	up
ko04510	Focal adhesion	0.000281466	ENSRNOG00000019648	AABR07068316	K06238	NA	collagen type VI alpha 3 chain [Source:NCBI gene;Acc:367313]	40.6971	40.1941	29.747	15.4429	18.342	18.1571	2.13003	1.09088	up
ko04510	Focal adhesion	0.000281466	ENSRNOG00000020246	Myl9	K12755	NA	myosin light chain 9 [Source:RGD Symbol;Acc:1311235]	135.556	142.75	155.595	45.8177	50.7849	52.6763	2.90665	1.53936	up
ko04510	Focal adhesion	0.000281466	ENSRNOG00000021441	Reln	K06249	EC:3.4.21.-	reelin [Source:RGD Symbol;Acc:3553]	1.29369	0.821935	0.847471	0.404149	0.376892	0.356867	2.60398	1.38072	up
ko04510	Focal adhesion	0.000281466	ENSRNOG00000023972	Col4a2	K06237	NA	collagen type IV alpha 2 chain [Source:RGD Symbol;Acc:1308085]	134.643	170.785	148.447	55.5573	64.3337	79.1798	2.27997	1.18901	up
ko04510	Focal adhesion	0.000281466	ENSRNOG00000031782	Col6a4	K06238	NA	collagen, type VI, alpha 4 [Source:RGD Symbol;Acc:1564060]	1.63066	2.88537	1.2454	5.02547	6.16786	9.0251	0.284959	-1.81117	down
ko04510	Focal adhesion	0.000281466	ENSRNOG00000043451	Spp1	K06250	NA	secreted phosphoprotein 1 [Source:RGD Symbol;Acc:3752]	129.555	106.043	88.3967	9.8296	1.21233	1.83191	25.1669	4.65346	up
ko04510	Focal adhesion	0.000281466	ENSRNOG00000045829	Thbs1	K16857	NA	thrombospondin 1 [Source:RGD Symbol;Acc:1588455]	69.4641	106.372	164.303	19.9347	19.858	26.7682	5.11019	2.35338	up
ko04510	Focal adhesion	0.000281466	ENSRNOG00000051964	LOC108348190	K04357	NA	uncharacterized LOC108348190 [Source:RGD Symbol;Acc:11520363]	0.212498	0.315292	0.147029	0.358931	0.514377	0.568232	0.468124	-1.09504	down
ko04510	Focal adhesion	0.000281466	ENSRNOG00000052925	NEWGENE_621351	K06236	NA	collagen, type I, alpha 2 [Source:RGD Symbol;Acc:9452897]	98.967	66.7797	60.9449	18.46	15.0008	14.0315	4.77323	2.25497	up
ko04510	Focal adhesion	0.000281466	ENSRNOG00000054371	Prkcg	K19663	EC:2.7.11.13	protein kinase C, gamma [Source:RGD Symbol;Acc:3397]	1.53377	1.93347	1.8286	3.48216	4.70262	3.15826	0.46688	-1.09888	down
ko04510	Focal adhesion	0.000281466	ENSRNOG00000056129	LOC102554659	K06247	NA	laminin subunit gamma-3-like [Source:RGD Symbol;Acc:7518353]	0.143205	0.092271	0.140703	0.320804	0.459925	0.441261	0.307841	-1.69974	down
ko04510	Focal adhesion	0.000281466	ENSRNOG00000056756	Actn1	K05699	NA	actinin, alpha 1 [Source:RGD Symbol;Acc:70907]	53.4333	54.3079	64.5786	24.6416	28.3915	29.6839	2.08324	1.05883	up
ko04510	Focal adhesion	0.000281466	ENSRNOG00000058111	Itga2	K06481	NA	integrin subunit alpha 2 [Source:RGD Symbol;Acc:621632]	2.02287	2.41017	1.73864	0.541871	0.886078	0.645843	2.97604	1.57339	up
ko04510	Focal adhesion	0.000281466	ENSRNOG00000058645	Tnc	K06252	NA	tenascin C [Source:RGD Symbol;Acc:621057]	32.8819	24.6221	38.6851	6.23045	5.06284	5.64608	5.67843	2.50549	up
ko04510	Focal adhesion	0.000281466	ENSRNOG00000059507	Lamc3	K06247	NA	laminin subunit gamma 3 [Source:RGD Symbol;Acc:1309399]	0.642198	0.669721	0.48091	1.12057	1.16744	1.51648	0.47124	-1.08547	down
ko04614	Renin-angiotensin system	0.00046665	ENSRNOG00000002937	Ren	K01380	EC:3.4.23.15	renin [Source:RGD Symbol;Acc:3554]	0.210662	0.122506	0	0	0	0	1110.56	10.1171	up
ko04614	Renin-angiotensin system	0.00046665	ENSRNOG00000007467	Ace3	K01283	EC:3.4.15.1	angiotensin I converting enzyme (peptidyl-dipeptidase A) 3 [Source:RGD Symbol;Acc:1561299]	0.356023	1.00323	0.275359	2.20798	2.82272	2.16244	0.227246	-2.13767	down
ko04614	Renin-angiotensin system	0.00046665	ENSRNOG00000011181	Cpa3	K08780	EC:3.4.17.1	carboxypeptidase A3 [Source:RGD Symbol;Acc:2390]	47.1511	14.3733	13.2997	1.9191	1.45637	1.13267	16.5976	4.0529	up
ko04614	Renin-angiotensin system	0.00046665	ENSRNOG00000020563	Cma1	K01329	EC:3.4.21.39	chymase 1 [Source:RGD Symbol;Acc:2365]	39.918	10.9509	5.28186	1.65773	1.49175	1.16244	13.0222	3.7029	up
ko04614	Renin-angiotensin system	0.00046665	ENSRNOG00000049096	Mcpt8l2	K01319	EC:3.4.21.20	mast cell protease 8-like 2 [Source:RGD Symbol;Acc:1302938]	19.7922	6.79392	4.06669	2.27301	0.99425	1.45419	6.49224	2.69872	up
ko04614	Renin-angiotensin system	0.00046665	ENSRNOG00000049991	Mcpt8l3	K01319	EC:3.4.21.20	mast cell protease 8-like 3 [Source:RGD Symbol;Acc:1302975]	6.48812	1.91135	1.06625	0.881239	0.828065	0.794557	3.78045	1.91856	up
ko04614	Renin-angiotensin system	0.00046665	ENSRNOG00000051854	Enpep	K11141	EC:3.4.11.7	glutamyl aminopeptidase [Source:RGD Symbol;Acc:621228]	8.50375	10.2131	12.2843	40.6763	34.8158	32.8775	0.286069	-1.80556	down
ko04614	Renin-angiotensin system	0.00046665	ENSRNOG00000053494	Mcpt1l1	K01329	EC:3.4.21.39	mast cell protease 1-like 1 [Source:RGD Symbol;Acc:2321286]	98.5586	20.0421	7.15613	1.23664	0.78863	1.70696	33.6949	5.07446	up
ko04614	Renin-angiotensin system	0.00046665	ENSRNOG00000062101	Ace	K01283	EC:3.4.15.1	angiotensin I converting enzyme [Source:RGD Symbol;Acc:2493]	116.54	162.976	113.041	251.855	283.285	379.239	0.429316	-1.21989	down
ko05142	Chagas disease (American trypanosomiasis)	0.00051735	ENSRNOG00000001414	Serpine1	NA	NA	serpin family E member 1 [Source:RGD Symbol;Acc:3249]	55.409	67.7847	164.683	7.58747	10.5169	14.5605	8.81302	3.13964	up
ko05142	Chagas disease (American trypanosomiasis)	0.00051735	ENSRNOG00000002418	Tgfb2	K13376	NA	transforming growth factor, beta 2 [Source:RGD Symbol;Acc:70491]	32.2616	34.4352	34.8496	12.3645	10.9716	12.4504	2.83756	1.50465	up
ko05142	Chagas disease (American trypanosomiasis)	0.00051735	ENSRNOG00000002978	Faslg	K04389	NA	Fas ligand [Source:RGD Symbol;Acc:3880]	0.816894	1.01133	0.807977	3.43662	5.79528	3.71874	0.203558	-2.29649	down
ko05142	Chagas disease (American trypanosomiasis)	0.00051735	ENSRNOG00000003298	Cd247	K06453	NA	Cd247 molecule [Source:RGD Symbol;Acc:2305]	3.27195	2.92367	1.71789	6.18881	10.0058	6.84293	0.343505	-1.5416	down
ko05142	Chagas disease (American trypanosomiasis)	0.00051735	ENSRNOG00000007159	Ccl2	K14624	NA	C-C motif chemokine ligand 2 [Source:RGD Symbol;Acc:3645]	37.7066	18.9936	41.8423	1.20024	1.4775	2.90705	17.6448	4.14117	up
ko05142	Chagas disease (American trypanosomiasis)	0.00051735	ENSRNOG00000007467	Ace3	K01283	EC:3.4.15.1	angiotensin I converting enzyme (peptidyl-dipeptidase A) 3 [Source:RGD Symbol;Acc:1561299]	0.356023	1.00323	0.275359	2.20798	2.82272	2.16244	0.227246	-2.13767	down
ko05142	Chagas disease (American trypanosomiasis)	0.00051735	ENSRNOG00000007468	Ifng	K04687	NA	interferon gamma [Source:RGD Symbol;Acc:2866]	0	0	0	0.111509	0.315579	0.259981	0.000436637	-11.1613	down
ko05142	Chagas disease (American trypanosomiasis)	0.00051735	ENSRNOG00000009867	Tgfb3	K13377	NA	transforming growth factor, beta 3 [Source:RGD Symbol;Acc:3851]	28.04	20.6768	22.6266	8.0599	7.08636	6.45932	3.30208	1.72338	up
ko05142	Chagas disease (American trypanosomiasis)	0.00051735	ENSRNOG00000010278	Il6	K05405	NA	interleukin 6 [Source:RGD Symbol;Acc:2901]	3.16485	2.11915	11.0231	0.116354	0.115796	0.224046	35.7458	5.1597	up
ko05142	Chagas disease (American trypanosomiasis)	0.00051735	ENSRNOG00000010906	Ccl5	K12499	NA	C-C motif chemokine ligand 5 [Source:RGD Symbol;Acc:69069]	33.6073	45.533	17.0812	161.621	269.977	147.801	0.166071	-2.59013	down
ko05142	Chagas disease (American trypanosomiasis)	0.00051735	ENSRNOG00000012749	C1qb	NA	NA	complement C1q B chain [Source:RGD Symbol;Acc:2229]	68.8056	59.044	60.4535	22.5219	17.5828	21.0046	3.08141	1.62359	up
ko05142	Chagas disease (American trypanosomiasis)	0.00051735	ENSRNOG00000012804	C1qc	K03988	NA	complement C1q C chain [Source:RGD Symbol;Acc:1306828]	74.9961	68.9488	69.0432	27.4504	22.6791	29.6529	2.66961	1.41663	up
ko05142	Chagas disease (American trypanosomiasis)	0.00051735	ENSRNOG00000012807	C1qa	K03986	NA	complement C1q A chain [Source:RGD Symbol;Acc:1306716]	101.115	87.5529	87.2321	25.1176	20.886	29.14	3.67164	1.87642	up
ko05142	Chagas disease (American trypanosomiasis)	0.00051735	ENSRNOG00000015994	Cd3d	K06450	NA	CD3d molecule [Source:RGD Symbol;Acc:2304]	2.36595	1.55482	1.11031	3.79028	4.24872	4.54988	0.399646	-1.32321	down
ko05142	Chagas disease (American trypanosomiasis)	0.00051735	ENSRNOG00000018851	Ppp2r2b	K04354	NA	protein phosphatase 2, regulatory subunit B, beta [Source:RGD Symbol;Acc:631441]	3.16847	2.77345	3.60839	1.62792	1.1151	0.816664	2.68291	1.4238	up
ko05142	Chagas disease (American trypanosomiasis)	0.00051735	ENSRNOG00000029768	Ccl12	K14624	NA	chemokine (C-C motif) ligand 12 [Source:RGD Symbol;Acc:1309255]	6.0007	2.47451	2.57848	0	0.075135	0.603588	16.286	4.02556	up
ko05142	Chagas disease (American trypanosomiasis)	0.00051735	ENSRNOG00000030387	Kng1	K03898	NA	kininogen 1 [Source:RGD Symbol;Acc:1359376]	21.2306	13.4328	16.0391	1.66566	2.34674	4.32674	6.08007	2.60409	up
ko05142	Chagas disease (American trypanosomiasis)	0.00051735	ENSRNOG00000033119	Plcb4	K05858	EC:3.1.4.11	phospholipase C, beta 4 [Source:RGD Symbol;Acc:3345]	7.14989	7.94063	6.17429	13.1434	15.847	14.3553	0.490587	-1.02742	down
ko05142	Chagas disease (American trypanosomiasis)	0.00051735	ENSRNOG00000059479	Adcy1	K08041	EC:4.6.1.1	adenylate cyclase 1 [Source:RGD Symbol;Acc:1309318]	0.206208	0.356452	0.124273	1.28217	1.19576	1.45355	0.174726	-2.51683	down
ko05142	Chagas disease (American trypanosomiasis)	0.00051735	ENSRNOG00000062101	Ace	K01283	EC:3.4.15.1	angiotensin I converting enzyme [Source:RGD Symbol;Acc:2493]	116.54	162.976	113.041	251.855	283.285	379.239	0.429316	-1.21989	down
ko05414	Dilated cardiomyopathy (DCM)	0.00066139	ENSRNOG00000000413	Pln	K05852	NA	phospholamban [Source:RGD Symbol;Acc:619894]	2.50693	3.8037	2.06136	1.0686	1.05846	0.925892	2.74226	1.45537	up
ko05414	Dilated cardiomyopathy (DCM)	0.00066139	ENSRNOG00000002418	Tgfb2	K13376	NA	transforming growth factor, beta 2 [Source:RGD Symbol;Acc:70491]	32.2616	34.4352	34.8496	12.3645	10.9716	12.4504	2.83756	1.50465	up
ko05414	Dilated cardiomyopathy (DCM)	0.00066139	ENSRNOG00000003245	Cacng1	NA	NA	calcium voltage-gated channel auxiliary subunit gamma 1 [Source:RGD Symbol;Acc:2249]	0.342541	0.070667	0.216756	0.041472	0	0	15.1901	3.92506	up
ko05414	Dilated cardiomyopathy (DCM)	0.00066139	ENSRNOG00000003998	Sgca	K12565	NA	sarcoglycan, alpha [Source:RGD Symbol;Acc:1308062]	2.86595	3.15146	2.51249	0.916284	2.09906	1.11714	2.06411	1.04552	up
ko05414	Dilated cardiomyopathy (DCM)	0.00066139	ENSRNOG00000006569	Itgb8	K06591	NA	integrin subunit beta 8 [Source:RGD Symbol;Acc:1311374]	2.69064	1.81036	3.42008	1.06221	1.22856	0.71459	2.63565	1.39816	up
ko05414	Dilated cardiomyopathy (DCM)	0.00066139	ENSRNOG00000006723	Itga11	K06587	NA	integrin subunit alpha 11 [Source:RGD Symbol;Acc:1311711]	2.02577	0.948998	1.43154	0.445333	0.566447	0.898136	2.30707	1.20606	up
ko05414	Dilated cardiomyopathy (DCM)	0.00066139	ENSRNOG00000007666	Cacnb4	K04865	NA	calcium voltage-gated channel auxiliary subunit beta 4 [Source:RGD Symbol;Acc:68385]	0.231166	0.227915	0.115713	0.714819	1.19904	0.551053	0.23319	-2.10042	down
ko05414	Dilated cardiomyopathy (DCM)	0.00066139	ENSRNOG00000008536	Actc1	NA	NA	actin, alpha, cardiac muscle 1 [Source:RGD Symbol;Acc:2026]	37.3836	38.0183	33.7249	14.0479	7.50795	11.0879	3.34296	1.74112	up
ko05414	Dilated cardiomyopathy (DCM)	0.00066139	ENSRNOG00000009867	Tgfb3	K13377	NA	transforming growth factor, beta 3 [Source:RGD Symbol;Acc:3851]	28.04	20.6768	22.6266	8.0599	7.08636	6.45932	3.30208	1.72338	up
ko05414	Dilated cardiomyopathy (DCM)	0.00066139	ENSRNOG00000012307	Mybpc3	K12568	NA	myosin binding protein C, cardiac [Source:RGD Symbol;Acc:1305950]	0.049032	0.067742	0.063231	0.968177	0.07676	0.44193	0.121063	-3.04617	down
ko05414	Dilated cardiomyopathy (DCM)	0.00066139	ENSRNOG00000014603	Sgcg	K12564	NA	sarcoglycan, gamma [Source:RGD Symbol;Acc:1359577]	13.5611	9.46866	11.7961	1.57006	3.5042	3.33878	4.13951	2.04946	up
ko05414	Dilated cardiomyopathy (DCM)	0.00066139	ENSRNOG00000016731	Tpm2	K10374	NA	tropomyosin 2 [Source:RGD Symbol;Acc:1559479]	130.596	119.409	127.205	32.1348	33.0202	37.6343	3.66974	1.87568	up
ko05414	Dilated cardiomyopathy (DCM)	0.00066139	ENSRNOG00000016983	Myh7	K17751	NA	myosin heavy chain 7 [Source:RGD Symbol;Acc:62030]	0	0.002143	0	0.338331	0.00473	0.074469	0.00513257	-7.6061	down
ko05414	Dilated cardiomyopathy (DCM)	0.00066139	ENSRNOG00000019810	Des	K07610	NA	desmin [Source:RGD Symbol;Acc:620686]	92.8023	102.513	108.876	30.2923	29.057	31.5052	3.34812	1.74335	up
ko05414	Dilated cardiomyopathy (DCM)	0.00066139	ENSRNOG00000025757	Myh6	NA	NA	myosin heavy chain 6 [Source:RGD Symbol;Acc:62029]	0	0.014741	0.007949	5.02898	0.023107	2.7062	0.00292461	-8.41754	down
ko05414	Dilated cardiomyopathy (DCM)	0.00066139	ENSRNOG00000054274	Cacnb3	NA	NA	calcium voltage-gated channel auxiliary subunit beta 3 [Source:RGD Symbol;Acc:2248]	12.6099	10.2322	7.67604	5.49561	3.55387	4.34237	2.27886	1.18831	up
ko05414	Dilated cardiomyopathy (DCM)	0.00066139	ENSRNOG00000058111	Itga2	K06481	NA	integrin subunit alpha 2 [Source:RGD Symbol;Acc:621632]	2.02287	2.41017	1.73864	0.541871	0.886078	0.645843	2.97604	1.57339	up
ko05414	Dilated cardiomyopathy (DCM)	0.00066139	ENSRNOG00000059479	Adcy1	K08041	EC:4.6.1.1	adenylate cyclase 1 [Source:RGD Symbol;Acc:1309318]	0.206208	0.356452	0.124273	1.28217	1.19576	1.45355	0.174726	-2.51683	down
ko04151	PI3K-Akt signaling pathway	0.000733946	ENSRNOG00000000521	Cdkn1a	K06625	NA	cyclin-dependent kinase inhibitor 1A [Source:RGD Symbol;Acc:69328]	60.966	98.6015	55.2437	36.6148	37.2161	27.4646	2.12064	1.0845	up
ko04151	PI3K-Akt signaling pathway	0.000733946	ENSRNOG00000001249	Col6a1	K06238	NA	collagen type VI alpha 1 chain [Source:RGD Symbol;Acc:1565398]	133.697	116.137	100.859	46.125	44.8447	58.8249	2.34116	1.22722	up
ko04151	PI3K-Akt signaling pathway	0.000733946	ENSRNOG00000001254	Col6a2	K06238	NA	collagen type VI alpha 2 chain [Source:RGD Symbol;Acc:1305585]	151.096	132.236	115.094	51.6944	53.0243	62.9982	2.37559	1.24829	up
ko04151	PI3K-Akt signaling pathway	0.000733946	ENSRNOG00000002158	Ibsp	K06253	NA	integrin-binding sialoprotein [Source:RGD Symbol;Acc:2855]	2.52661	2.01495	2.65804	0.518978	0.429105	0.498763	4.97606	2.315	up
ko04151	PI3K-Akt signaling pathway	0.000733946	ENSRNOG00000002244	Pdgfra	K04363	EC:2.7.10.1	platelet derived growth factor receptor alpha [Source:RGD Symbol;Acc:3284]	10.7913	10.4928	10.1398	22.5292	21.8926	24.1598	0.458196	-1.12596	down
ko04151	PI3K-Akt signaling pathway	0.000733946	ENSRNOG00000002548	Tnn	K06252	NA	tenascin N [Source:RGD Symbol;Acc:1306002]	3.51992	0.787354	1.0593	0.259756	0.338104	0.237335	6.42553	2.68382	up
ko04151	PI3K-Akt signaling pathway	0.000733946	ENSRNOG00000002754	Areg	K09782	NA	amphiregulin [Source:RGD Symbol;Acc:2149]	15.0098	32.3225	41.5271	12.678	12.7718	5.23223	2.89613	1.53413	up
ko04151	PI3K-Akt signaling pathway	0.000733946	ENSRNOG00000002771	Ereg	K09784	NA	epiregulin [Source:RGD Symbol;Acc:620299]	3.53527	6.81166	10.5663	3.01735	3.00566	2.96011	2.32806	1.21913	up
ko04151	PI3K-Akt signaling pathway	0.000733946	ENSRNOG00000002978	Faslg	K04389	NA	Fas ligand [Source:RGD Symbol;Acc:3880]	0.816894	1.01133	0.807977	3.43662	5.79528	3.71874	0.203558	-2.29649	down
ko04151	PI3K-Akt signaling pathway	0.000733946	ENSRNOG00000003897	Col1a1	NA	NA	collagen type I alpha 1 chain [Source:RGD Symbol;Acc:61817]	330.164	210.993	127.588	21.9343	20.0594	21.0288	10.6112	3.40752	up
ko04151	PI3K-Akt signaling pathway	0.000733946	ENSRNOG00000005650	Pgf	K16859	NA	placental growth factor [Source:RGD Symbol;Acc:619850]	4.74821	4.86013	6.89225	1.81335	1.74628	1.74662	3.10965	1.63675	up
ko04151	PI3K-Akt signaling pathway	0.000733946	ENSRNOG00000006569	Itgb8	K06591	NA	integrin subunit beta 8 [Source:RGD Symbol;Acc:1311374]	2.69064	1.81036	3.42008	1.06221	1.22856	0.71459	2.63565	1.39816	up
ko04151	PI3K-Akt signaling pathway	0.000733946	ENSRNOG00000006723	Itga11	K06587	NA	integrin subunit alpha 11 [Source:RGD Symbol;Acc:1311711]	2.02577	0.948998	1.43154	0.445333	0.566447	0.898136	2.30707	1.20606	up
ko04151	PI3K-Akt signaling pathway	0.000733946	ENSRNOG00000008587	Tek	K05121	EC:2.7.10.1	TEK receptor tyrosine kinase [Source:RGD Symbol;Acc:620980]	65.5676	80.6655	55.963	143.626	152.459	196.801	0.410229	-1.2855	down
ko04151	PI3K-Akt signaling pathway	0.000733946	ENSRNOG00000008759	Csf3r	K05061	NA	colony stimulating factor 3 receptor [Source:RGD Symbol;Acc:1309114]	4.8101	3.47951	3.78326	8.0264	6.94395	12.168	0.444864	-1.16856	down
ko04151	PI3K-Akt signaling pathway	0.000733946	ENSRNOG00000010278	Il6	K05405	NA	interleukin 6 [Source:RGD Symbol;Acc:2901]	3.16485	2.11915	11.0231	0.116354	0.115796	0.224046	35.7458	5.1597	up
ko04151	PI3K-Akt signaling pathway	0.000733946	ENSRNOG00000010529	Thbs2	K04659	NA	thrombospondin 2 [Source:RGD Symbol;Acc:1310979]	16.9175	9.7328	15.9974	0.842375	0.59486	0.649489	20.4376	4.35316	up
ko04151	PI3K-Akt signaling pathway	0.000733946	ENSRNOG00000011292	NEWGENE_621351	K06236	NA	collagen, type I, alpha 2 [Source:RGD Symbol;Acc:9452897]	262.119	200.003	149.732	39.3449	35.4719	44.7937	5.11539	2.35484	up
ko04151	PI3K-Akt signaling pathway	0.000733946	ENSRNOG00000013953	Ntrk1	K03176	EC:2.7.10.1	neurotrophic receptor tyrosine kinase 1 [Source:RGD Symbol;Acc:620144]	0.089799	0.0959429	0.0319835	0.269543	0.411822	0.210092	0.244236	-2.03366	down
ko04151	PI3K-Akt signaling pathway	0.000733946	ENSRNOG00000014248	Erbb4	K05085	EC:2.7.10.1	erb-b2 receptor tyrosine kinase 4 [Source:RGD Symbol;Acc:620486]	0.102964	0.118757	0.047957	0.602772	0.820792	0.860173	0.118086	-3.08209	down
ko04151	PI3K-Akt signaling pathway	0.000733946	ENSRNOG00000014288	Fn1	K05717	NA	fibronectin 1 [Source:RGD Symbol;Acc:2624]	280.945	248.379	229.735	57.4707	64.5711	77.3481	3.80691	1.92862	up
ko04151	PI3K-Akt signaling pathway	0.000733946	ENSRNOG00000014786	Ccne1	K06626	NA	cyclin E1 [Source:RGD Symbol;Acc:2294]	1.62725	1.32867	1.53513	0.320929	0.475594	0.655549	3.09286	1.62894	up
ko04151	PI3K-Akt signaling pathway	0.000733946	ENSRNOG00000015260	Lpar3	K04294	NA	lysophosphatidic acid receptor 3 [Source:RGD Symbol;Acc:620565]	4.46911	5.9081	4.11901	16.6929	15.1815	12.4222	0.327254	-1.61152	down
ko04151	PI3K-Akt signaling pathway	0.000733946	ENSRNOG00000016281	Col4a1	K06237	NA	collagen type IV alpha 1 chain [Source:RGD Symbol;Acc:1307148]	228.604	293.978	253.367	78.1782	93.3833	113.433	2.72268	1.44503	up
ko04151	PI3K-Akt signaling pathway	0.000733946	ENSRNOG00000016571	Ngf	K02582	NA	nerve growth factor [Source:RGD Symbol;Acc:1598328]	0.683532	0.348949	0.591755	0.156563	0.22621	0.0462036	3.78631	1.92079	up
ko04151	PI3K-Akt signaling pathway	0.000733946	ENSRNOG00000016696	Angpt2	K05466	NA	angiopoietin 2 [Source:RGD Symbol;Acc:621861]	8.59042	8.08431	6.18316	3.01199	2.77709	3.05503	2.58453	1.3699	up
ko04151	PI3K-Akt signaling pathway	0.000733946	ENSRNOG00000017237	Lama1	K05637	NA	laminin subunit alpha 1 [Source:RGD Symbol;Acc:1307207]	0.012656	0.0023	0.040977	0	0	0	186.443	7.54259	up
ko04151	PI3K-Akt signaling pathway	0.000733946	ENSRNOG00000018311	Cd19	K06465	NA	CD19 molecule [Source:RGD Symbol;Acc:1309086]	2.21263	3.85382	0.701309	6.29733	6.57261	7.80581	0.327328	-1.61119	down
ko04151	PI3K-Akt signaling pathway	0.000733946	ENSRNOG00000018461	Pdgfrb	NA	NA	platelet derived growth factor receptor beta [Source:RGD Symbol;Acc:3285]	29.9477	33.1625	27.8463	12.2108	11.6934	13.6546	2.42171	1.27603	up
ko04151	PI3K-Akt signaling pathway	0.000733946	ENSRNOG00000018839	Ntrk2	K04360	EC:2.7.10.1	neurotrophic receptor tyrosine kinase 2 [Source:RGD Symbol;Acc:3213]	2.74908	5.01041	5.1754	0.644865	1.09069	0.941283	4.83215	2.27267	up
ko04151	PI3K-Akt signaling pathway	0.000733946	ENSRNOG00000018851	Ppp2r2b	K04354	NA	protein phosphatase 2, regulatory subunit B, beta [Source:RGD Symbol;Acc:631441]	3.16847	2.77345	3.60839	1.62792	1.1151	0.816664	2.68291	1.4238	up
ko04151	PI3K-Akt signaling pathway	0.000733946	ENSRNOG00000019648	AABR07068316	K06238	NA	collagen type VI alpha 3 chain [Source:NCBI gene;Acc:367313]	40.6971	40.1941	29.747	15.4429	18.342	18.1571	2.13003	1.09088	up
ko04151	PI3K-Akt signaling pathway	0.000733946	ENSRNOG00000020588	Efna4	K05462	NA	ephrin A4 [Source:RGD Symbol;Acc:1307808]	4.37508	3.91485	4.22177	1.50692	1.92215	1.37655	2.60356	1.38048	up
ko04151	PI3K-Akt signaling pathway	0.000733946	ENSRNOG00000021441	Reln	K06249	EC:3.4.21.-	reelin [Source:RGD Symbol;Acc:3553]	1.29369	0.821935	0.847471	0.404149	0.376892	0.356867	2.60398	1.38072	up
ko04151	PI3K-Akt signaling pathway	0.000733946	ENSRNOG00000023972	Col4a2	K06237	NA	collagen type IV alpha 2 chain [Source:RGD Symbol;Acc:1308085]	134.643	170.785	148.447	55.5573	64.3337	79.1798	2.27997	1.18901	up
ko04151	PI3K-Akt signaling pathway	0.000733946	ENSRNOG00000031782	Col6a4	K06238	NA	collagen, type VI, alpha 4 [Source:RGD Symbol;Acc:1564060]	1.63066	2.88537	1.2454	5.02547	6.16786	9.0251	0.284959	-1.81117	down
ko04151	PI3K-Akt signaling pathway	0.000733946	ENSRNOG00000033192	Osmr	K05057	NA	oncostatin M receptor [Source:RGD Symbol;Acc:1302983]	11.718	9.37308	19.7537	4.0249	3.86177	3.74351	3.51197	1.81228	up
ko04151	PI3K-Akt signaling pathway	0.000733946	ENSRNOG00000043451	Spp1	K06250	NA	secreted phosphoprotein 1 [Source:RGD Symbol;Acc:3752]	129.555	106.043	88.3967	9.8296	1.21233	1.83191	25.1669	4.65346	up
ko04151	PI3K-Akt signaling pathway	0.000733946	ENSRNOG00000045829	Thbs1	K16857	NA	thrombospondin 1 [Source:RGD Symbol;Acc:1588455]	69.4641	106.372	164.303	19.9347	19.858	26.7682	5.11019	2.35338	up
ko04151	PI3K-Akt signaling pathway	0.000733946	ENSRNOG00000048636	Il2rb	K05069	NA	interleukin 2 receptor subunit beta [Source:RGD Symbol;Acc:2896]	6.32093	7.65754	3.20297	18.9429	37.4261	22.1126	0.218923	-2.1915	down
ko04151	PI3K-Akt signaling pathway	0.000733946	ENSRNOG00000051964	LOC108348190	K04357	NA	uncharacterized LOC108348190 [Source:RGD Symbol;Acc:11520363]	0.212498	0.315292	0.147029	0.358931	0.514377	0.568232	0.468124	-1.09504	down
ko04151	PI3K-Akt signaling pathway	0.000733946	ENSRNOG00000052205	Fgf23	K22428	NA	fibroblast growth factor 23 [Source:RGD Symbol;Acc:620178]	0.318321	0.976255	0.694014	0	0	0	6628.63	12.6945	up
ko04151	PI3K-Akt signaling pathway	0.000733946	ENSRNOG00000052925	NEWGENE_621351	K06236	NA	collagen, type I, alpha 2 [Source:RGD Symbol;Acc:9452897]	98.967	66.7797	60.9449	18.46	15.0008	14.0315	4.77323	2.25497	up
ko04151	PI3K-Akt signaling pathway	0.000733946	ENSRNOG00000056129	LOC102554659	K06247	NA	laminin subunit gamma-3-like [Source:RGD Symbol;Acc:7518353]	0.143205	0.092271	0.140703	0.320804	0.459925	0.441261	0.307841	-1.69974	down
ko04151	PI3K-Akt signaling pathway	0.000733946	ENSRNOG00000058111	Itga2	K06481	NA	integrin subunit alpha 2 [Source:RGD Symbol;Acc:621632]	2.02287	2.41017	1.73864	0.541871	0.886078	0.645843	2.97604	1.57339	up
ko04151	PI3K-Akt signaling pathway	0.000733946	ENSRNOG00000058645	Tnc	K06252	NA	tenascin C [Source:RGD Symbol;Acc:621057]	32.8819	24.6221	38.6851	6.23045	5.06284	5.64608	5.67843	2.50549	up
ko04151	PI3K-Akt signaling pathway	0.000733946	ENSRNOG00000059507	Lamc3	K06247	NA	laminin subunit gamma 3 [Source:RGD Symbol;Acc:1309399]	0.642198	0.669721	0.48091	1.12057	1.16744	1.51648	0.47124	-1.08547	down
ko04350	TGF-beta signaling pathway	0.00113626	ENSRNOG00000001750	Chrd	K04657	NA	chordin [Source:RGD Symbol;Acc:620181]	2.98953	2.01903	3.44486	1.74957	1.20295	1.00158	2.13788	1.09618	up
ko04350	TGF-beta signaling pathway	0.00113626	ENSRNOG00000002418	Tgfb2	K13376	NA	transforming growth factor, beta 2 [Source:RGD Symbol;Acc:70491]	32.2616	34.4352	34.8496	12.3645	10.9716	12.4504	2.83756	1.50465	up
ko04350	TGF-beta signaling pathway	0.00113626	ENSRNOG00000004828	Acvr1c	K13568	EC:2.7.11.30	activin A receptor type 1C [Source:RGD Symbol;Acc:621789]	0.12058	0.010915	0.092872	0.332658	0.442515	0.377397	0.194667	-2.36092	down
ko04350	TGF-beta signaling pathway	0.00113626	ENSRNOG00000007468	Ifng	K04687	NA	interferon gamma [Source:RGD Symbol;Acc:2866]	0	0	0	0.111509	0.315579	0.259981	0.000436637	-11.1613	down
ko04350	TGF-beta signaling pathway	0.00113626	ENSRNOG00000007810	Gdf6	K20012	NA	growth differentiation factor 6 [Source:RGD Symbol;Acc:620104]	0.222642	0.323762	0.898277	0.028828	0.075581	0.015319	12.0664	3.59292	up
ko04350	TGF-beta signaling pathway	0.00113626	ENSRNOG00000009173	Smad6	K04677	NA	SMAD family member 6 [Source:RGD Symbol;Acc:1305069]	38.7147	45.9997	36.0966	70.4573	73.6564	110.163	0.475116	-1.07365	down
ko04350	TGF-beta signaling pathway	0.00113626	ENSRNOG00000009867	Tgfb3	K13377	NA	transforming growth factor, beta 3 [Source:RGD Symbol;Acc:3851]	28.04	20.6768	22.6266	8.0599	7.08636	6.45932	3.30208	1.72338	up
ko04350	TGF-beta signaling pathway	0.00113626	ENSRNOG00000011631	Fst	K04661	NA	follistatin [Source:RGD Symbol;Acc:2633]	15.1182	13.6322	18.0437	3.03205	2.47665	3.75114	5.05345	2.33727	up
ko04350	TGF-beta signaling pathway	0.00113626	ENSRNOG00000014320	Inhba	NA	NA	inhibin subunit beta A [Source:RGD Symbol;Acc:62074]	1.43305	0.871656	0.743097	0.170937	0.044034	0.019916	12.9756	3.69773	up
ko04350	TGF-beta signaling pathway	0.00113626	ENSRNOG00000014477	Acvr2b	K13596	EC:2.7.11.30	activin A receptor type 2B [Source:RGD Symbol;Acc:2028]	0.997803	0.727357	0.43188	1.44913	1.08119	1.98019	0.478225	-1.06424	down
ko04350	TGF-beta signaling pathway	0.00113626	ENSRNOG00000021029	Hamp	K23106	NA	hepcidin antimicrobial peptide [Source:RGD Symbol;Acc:70971]	0.685082	0.809251	0.93874	0.114888	0	0	21.1778	4.40448	up
ko04350	TGF-beta signaling pathway	0.00113626	ENSRNOG00000021276	Bmp2	NA	NA	bone morphogenetic protein 2 [Source:RGD Symbol;Acc:2211]	3.40519	7.43167	5.53057	2.54594	1.70193	2.53326	2.41367	1.27123	up
ko04350	TGF-beta signaling pathway	0.00113626	ENSRNOG00000023683	Nog	K04658	NA	noggin [Source:RGD Symbol;Acc:3183]	2.11527	1.40461	2.31452	0.699111	0.833725	0.961876	2.33871	1.22571	up
ko04350	TGF-beta signaling pathway	0.00113626	ENSRNOG00000026053	Grem1	NA	NA	gremlin 1, DAN family BMP antagonist [Source:RGD Symbol;Acc:2359]	3.7397	1.86409	4.41153	0.100842	0.313149	0.14419	17.9428	4.16533	up
ko04350	TGF-beta signaling pathway	0.00113626	ENSRNOG00000030155	Bmp8a	K16622	NA	bone morphogenetic protein 8a [Source:RGD Symbol;Acc:1585858]	0.24594	0.142431	0.13281	0.675516	0.572486	0.397535	0.316724	-1.6587	down
ko04350	TGF-beta signaling pathway	0.00113626	ENSRNOG00000033209	Bmp8b	K16622	NA	bone morphogenetic protein 8b [Source:RGD Symbol;Acc:1591873]	0.366519	0.45209	0.546395	1.03207	1.66145	1.31074	0.340888	-1.55263	down
ko04350	TGF-beta signaling pathway	0.00113626	ENSRNOG00000045829	Thbs1	K16857	NA	thrombospondin 1 [Source:RGD Symbol;Acc:1588455]	69.4641	106.372	164.303	19.9347	19.858	26.7682	5.11019	2.35338	up
ko04350	TGF-beta signaling pathway	0.00113626	ENSRNOG00000058416	LOC103691556	K16791	NA	SMAD family member 9 [Source:RGD Symbol;Acc:71004]	1.9725	1.61901	1.15685	2.94274	3.96602	3.91776	0.438586	-1.18907	down
ko04110	Cell cycle	0.00115088	ENSRNOG00000000521	Cdkn1a	K06625	NA	cyclin-dependent kinase inhibitor 1A [Source:RGD Symbol;Acc:69328]	60.966	98.6015	55.2437	36.6148	37.2161	27.4646	2.12064	1.0845	up
ko04110	Cell cycle	0.00115088	ENSRNOG00000000632	Cdk1	K02087	2.7.11.23;EC:2.7.11.22	cyclin-dependent kinase 1 [Source:RGD Symbol;Acc:2319]	13.2074	15.3817	18.7413	2.64068	4.12548	3.85137	4.45776	2.15632	up
ko04110	Cell cycle	0.00115088	ENSRNOG00000002105	Cdc7	K02214	EC:2.7.11.1	cell division cycle 7 [Source:RGD Symbol;Acc:1308351]	1.47858	1.58445	2.42449	0.766311	0.809981	0.812626	2.29708	1.1998	up
ko04110	Cell cycle	0.00115088	ENSRNOG00000002418	Tgfb2	K13376	NA	transforming growth factor, beta 2 [Source:RGD Symbol;Acc:70491]	32.2616	34.4352	34.8496	12.3645	10.9716	12.4504	2.83756	1.50465	up
ko04110	Cell cycle	0.00115088	ENSRNOG00000003703	Mcm6	NA	NA	minichromosome maintenance complex component 6 [Source:RGD Symbol;Acc:61967]	11.3477	9.93535	14.0188	4.23138	5.99744	6.14351	2.15619	1.10848	up
ko04110	Cell cycle	0.00115088	ENSRNOG00000003802	Pttg1	K06635	NA	PTTG1 regulator of sister chromatid separation, securin [Source:RGD Symbol;Acc:68359]	4.7681	5.24809	6.20749	0.786092	2.20623	1.23079	3.84164	1.94172	up
ko04110	Cell cycle	0.00115088	ENSRNOG00000007906	Bub1b	K06637	EC:2.7.11.1	BUB1 mitotic checkpoint serine/threonine kinase B [Source:RGD Symbol;Acc:619791]	2.68064	3.11257	3.39166	0.767653	1.01886	0.928755	3.38268	1.75817	up
ko04110	Cell cycle	0.00115088	ENSRNOG00000008841	Orc1	K02603	NA	origin recognition complex, subunit 1 [Source:RGD Symbol;Acc:631435]	0.714551	0.672883	1.15456	0.211497	0.467103	0.285456	2.63677	1.39877	up
ko04110	Cell cycle	0.00115088	ENSRNOG00000009867	Tgfb3	K13377	NA	transforming growth factor, beta 3 [Source:RGD Symbol;Acc:3851]	28.04	20.6768	22.6266	8.0599	7.08636	6.45932	3.30208	1.72338	up
ko04110	Cell cycle	0.00115088	ENSRNOG00000012835	Espl1	K02365	EC:3.4.22.49	extra spindle pole bodies like 1, separase [Source:RGD Symbol;Acc:1306266]	1.25076	1.06367	1.61809	0.50097	0.851101	0.511543	2.11016	1.07735	up
ko04110	Cell cycle	0.00115088	ENSRNOG00000014336	Mcm5	K02209	EC:3.6.4.12	minichromosome maintenance complex component 5 [Source:RGD Symbol;Acc:1306616]	6.53995	6.75158	9.54692	2.16203	2.89314	3.66249	2.61979	1.38945	up
ko04110	Cell cycle	0.00115088	ENSRNOG00000014786	Ccne1	K06626	NA	cyclin E1 [Source:RGD Symbol;Acc:2294]	1.62725	1.32867	1.53513	0.320929	0.475594	0.655549	3.09286	1.62894	up
ko04110	Cell cycle	0.00115088	ENSRNOG00000015423	Ccna2	K06627	NA	cyclin A2 [Source:RGD Symbol;Acc:621059]	6.5068	6.18522	6.15328	1.41045	1.83379	1.7034	3.80895	1.92939	up
ko04110	Cell cycle	0.00115088	ENSRNOG00000018815	Plk1	K06631	EC:2.7.11.21	polo-like kinase 1 [Source:RGD Symbol;Acc:3352]	4.81308	4.27321	4.3835	1.00901	1.56844	1.31794	3.45788	1.78989	up
ko04110	Cell cycle	0.00115088	ENSRNOG00000027787	Cdc6	K02213	NA	cell division cycle 6 [Source:RGD Symbol;Acc:1309157]	1.46241	1.4578	1.85542	0.32834	0.62808	0.458393	3.37545	1.75508	up
ko04110	Cell cycle	0.00115088	ENSRNOG00000028415	Cdc20	K03363	NA	cell division cycle 20 [Source:RGD Symbol;Acc:620477]	8.20218	8.18058	9.39277	1.63592	3.33288	2.76729	3.33185	1.73632	up
ko04110	Cell cycle	0.00115088	ENSRNOG00000029055	Ttk	K08866	EC:2.7.12.1	Ttk protein kinase [Source:RGD Symbol;Acc:1305558]	1.76797	1.98793	2.07074	0.584657	0.640686	0.550555	3.28096	1.71412	up
ko04110	Cell cycle	0.00115088	ENSRNOG00000032778	Bub1	K02178	EC:2.7.11.1	BUB1 mitotic checkpoint serine/threonine kinase [Source:RGD Symbol;Acc:1311707]	4.4385	4.93863	4.9439	1.72613	2.05124	1.64995	2.6387	1.39983	up
ko04110	Cell cycle	0.00115088	ENSRNOG00000033153	Sfn	K06644	NA	stratifin [Source:RGD Symbol;Acc:1304729]	22.9356	14.9716	33.5055	3.57864	3.88086	2.31316	7.3074	2.86936	up
ko04110	Cell cycle	0.00115088	ENSRNOG00000055111	AABR07000658	K21770	NA	cyclin B2-like [Source:NCBI gene;Acc:100364016]	5.51022	5.51102	6.25636	0.973042	1.20114	1.81881	4.32698	2.11336	up
ko04110	Cell cycle	0.00115088	ENSRNOG00000058539	Ccnb1	K05868	NA	cyclin B1 [Source:RGD Symbol;Acc:2291]	6.84248	5.36905	7.00748	1.32879	2.37311	1.92021	3.41846	1.77335	up
ko04110	Cell cycle	0.00115088	ENSRNOG00000059837	Cdkn2a	K06621	NA	cyclin-dependent kinase inhibitor 2A [Source:RGD Symbol;Acc:2323]	1.75201	2.25335	0.861979	0.590342	0.229968	0.204869	4.7478	2.24726	up
ko00982	Drug metabolism - cytochrome P450	0.00131461	ENSRNOG00000002331	Aldh3a1	K00129	EC:1.2.1.5	aldehyde dehydrogenase 3 family, member A1 [Source:RGD Symbol;Acc:2088]	0.906245	1.33741	0.734843	3.9607	3.15494	3.58458	0.278359	-1.84498	down
ko00982	Drug metabolism - cytochrome P450	0.00131461	ENSRNOG00000003510	Fmo2	K00485	EC:1.14.13.8	flavin containing dimethylaniline monoxygenase 2 [Source:RGD Symbol;Acc:628600]	36.2628	40.8993	13.9322	192.698	233.398	232.817	0.138249	-2.85466	down
ko00982	Drug metabolism - cytochrome P450	0.00131461	ENSRNOG00000003620	Fmo3	K00485	EC:1.14.13.8	flavin containing dimethylaniline monoxygenase 3 [Source:RGD Symbol;Acc:619761]	5.58543	7.00354	2.57024	21.0909	24.9678	23.727	0.217225	-2.20274	down
ko00982	Drug metabolism - cytochrome P450	0.00131461	ENSRNOG00000006583	Hpgds	K04097	2.5.1.18;EC:5.3.99.2	hematopoietic prostaglandin D synthase [Source:RGD Symbol;Acc:69251]	1.69319	0.758445	0.936303	0.319459	0.37114	0.312633	3.37703	1.75575	up
ko00982	Drug metabolism - cytochrome P450	0.00131461	ENSRNOG00000012458	Cyp2e1	K07415	EC:1.14.13.-	cytochrome P450, family 2, subfamily e, polypeptide 1 [Source:RGD Symbol;Acc:2475]	1.59029	2.0422	0.503894	11.7452	14.7012	19.1101	0.090797	-3.46121	down
ko00982	Drug metabolism - cytochrome P450	0.00131461	ENSRNOG00000015354	Aox1	K00157	EC:1.2.3.1	aldehyde oxidase 1 [Source:RGD Symbol;Acc:620528]	3.60537	5.38913	2.23097	11.3222	11.3536	11.3529	0.329883	-1.59998	down
ko00982	Drug metabolism - cytochrome P450	0.00131461	ENSRNOG00000019017	Gstm6	K00799	EC:2.5.1.18	glutathione S-transferase, mu 6 [Source:RGD Symbol;Acc:1563391]	0.072552	0.084308	0.123574	0.465283	0.252652	0.528694	0.224954	-2.1523	down
ko00982	Drug metabolism - cytochrome P450	0.00131461	ENSRNOG00000032959	Adh7	K13951	EC:1.1.1.1	alcohol dehydrogenase 7 (class IV), mu or sigma polypeptide [Source:RGD Symbol;Acc:621638]	2.43511	3.44985	1.51791	5.94367	5.77427	4.45965	0.457601	-1.12784	down
ko00982	Drug metabolism - cytochrome P450	0.00131461	ENSRNOG00000034191	Fmo1	K00485	EC:1.14.13.8	flavin containing dimethylaniline monoxygenase 1 [Source:RGD Symbol;Acc:2622]	38.1387	48.3555	27.5647	82.0484	87.3317	103.492	0.417994	-1.25844	down
ko00982	Drug metabolism - cytochrome P450	0.00131461	ENSRNOG00000049743	Gstm5	K00799	EC:2.5.1.18	glutathione S-transferase, mu 5 [Source:RGD Symbol;Acc:61964]	14.3618	10.7391	15.0375	7.82087	6.10415	5.18534	2.10035	1.07063	up
ko00982	Drug metabolism - cytochrome P450	0.00131461	ENSRNOG00000049851	Fmo6	K00485	EC:1.14.13.8	flavin containing monooxygenase 6 [Source:RGD Symbol;Acc:1559491]	0.023136	0.014864	0.04261	0.547255	0.484132	0.472266	0.0536094	-4.22137	down
ko00982	Drug metabolism - cytochrome P450	0.00131461	ENSRNOG00000062125	Aox3	K00157	EC:1.2.3.1	aldehyde oxidase 3 [Source:RGD Symbol;Acc:1359328]	0.87407	1.02473	0.56828	2.35684	2.41775	3.05158	0.315235	-1.6655	down
ko04933	AGE-RAGE signaling pathway in diabetic complications	0.00135316	ENSRNOG00000001414	Serpine1	NA	NA	serpin family E member 1 [Source:RGD Symbol;Acc:3249]	55.409	67.7847	164.683	7.58747	10.5169	14.5605	8.81302	3.13964	up
ko04933	AGE-RAGE signaling pathway in diabetic complications	0.00135316	ENSRNOG00000002418	Tgfb2	K13376	NA	transforming growth factor, beta 2 [Source:RGD Symbol;Acc:70491]	32.2616	34.4352	34.8496	12.3645	10.9716	12.4504	2.83756	1.50465	up
ko04933	AGE-RAGE signaling pathway in diabetic complications	0.00135316	ENSRNOG00000002723	Sele	K06494	NA	selectin E [Source:RGD Symbol;Acc:3654]	2.98187	1.19921	3.6168	0.289072	0.400788	0.3301	7.64528	2.93457	up
ko04933	AGE-RAGE signaling pathway in diabetic complications	0.00135316	ENSRNOG00000003357	Col3a1	K19720	NA	collagen type III alpha 1 chain [Source:RGD Symbol;Acc:71029]	773.166	628.281	469.974	156.474	148.568	159.465	4.02884	2.01036	up
ko04933	AGE-RAGE signaling pathway in diabetic complications	0.00135316	ENSRNOG00000003897	Col1a1	NA	NA	collagen type I alpha 1 chain [Source:RGD Symbol;Acc:61817]	330.164	210.993	127.588	21.9343	20.0594	21.0288	10.6112	3.40752	up
ko04933	AGE-RAGE signaling pathway in diabetic complications	0.00135316	ENSRNOG00000007159	Ccl2	K14624	NA	C-C motif chemokine ligand 2 [Source:RGD Symbol;Acc:3645]	37.7066	18.9936	41.8423	1.20024	1.4775	2.90705	17.6448	4.14117	up
ko04933	AGE-RAGE signaling pathway in diabetic complications	0.00135316	ENSRNOG00000009867	Tgfb3	K13377	NA	transforming growth factor, beta 3 [Source:RGD Symbol;Acc:3851]	28.04	20.6768	22.6266	8.0599	7.08636	6.45932	3.30208	1.72338	up
ko04933	AGE-RAGE signaling pathway in diabetic complications	0.00135316	ENSRNOG00000010278	Il6	K05405	NA	interleukin 6 [Source:RGD Symbol;Acc:2901]	3.16485	2.11915	11.0231	0.116354	0.115796	0.224046	35.7458	5.1597	up
ko04933	AGE-RAGE signaling pathway in diabetic complications	0.00135316	ENSRNOG00000011292	NEWGENE_621351	K06236	NA	collagen, type I, alpha 2 [Source:RGD Symbol;Acc:9452897]	262.119	200.003	149.732	39.3449	35.4719	44.7937	5.11539	2.35484	up
ko04933	AGE-RAGE signaling pathway in diabetic complications	0.00135316	ENSRNOG00000011800	F3	K03901	NA	coagulation factor III, tissue factor [Source:RGD Symbol;Acc:2587]	167.292	169.907	352.923	54.9981	53.3236	44.8062	4.50683	2.17211	up
ko04933	AGE-RAGE signaling pathway in diabetic complications	0.00135316	ENSRNOG00000014288	Fn1	K05717	NA	fibronectin 1 [Source:RGD Symbol;Acc:2624]	280.945	248.379	229.735	57.4707	64.5711	77.3481	3.80691	1.92862	up
ko04933	AGE-RAGE signaling pathway in diabetic complications	0.00135316	ENSRNOG00000015603	Prkce	NA	NA	protein kinase C, epsilon [Source:RGD Symbol;Acc:61925]	7.93806	8.81436	6.50926	11.1812	15.7408	20.6574	0.488903	-1.03238	down
ko04933	AGE-RAGE signaling pathway in diabetic complications	0.00135316	ENSRNOG00000016281	Col4a1	K06237	NA	collagen type IV alpha 1 chain [Source:RGD Symbol;Acc:1307148]	228.604	293.978	253.367	78.1782	93.3833	113.433	2.72268	1.44503	up
ko04933	AGE-RAGE signaling pathway in diabetic complications	0.00135316	ENSRNOG00000016695	Mmp2	K01398	EC:3.4.24.24	matrix metallopeptidase 2 [Source:RGD Symbol;Acc:621316]	112.629	84.3299	76.9475	30.7938	26.2646	32.2348	3.06749	1.61706	up
ko04933	AGE-RAGE signaling pathway in diabetic complications	0.00135316	ENSRNOG00000023972	Col4a2	K06237	NA	collagen type IV alpha 2 chain [Source:RGD Symbol;Acc:1308085]	134.643	170.785	148.447	55.5573	64.3337	79.1798	2.27997	1.18901	up
ko04933	AGE-RAGE signaling pathway in diabetic complications	0.00135316	ENSRNOG00000029768	Ccl12	K14624	NA	chemokine (C-C motif) ligand 12 [Source:RGD Symbol;Acc:1309255]	6.0007	2.47451	2.57848	0	0.075135	0.603588	16.286	4.02556	up
ko04933	AGE-RAGE signaling pathway in diabetic complications	0.00135316	ENSRNOG00000033119	Plcb4	K05858	EC:3.1.4.11	phospholipase C, beta 4 [Source:RGD Symbol;Acc:3345]	7.14989	7.94063	6.17429	13.1434	15.847	14.3553	0.490587	-1.02742	down
ko04933	AGE-RAGE signaling pathway in diabetic complications	0.00135316	ENSRNOG00000051986	Plcg2	NA	NA	phospholipase C, gamma 2 [Source:RGD Symbol;Acc:3348]	5.19104	6.76231	4.63746	12.3585	15.9316	15.9714	0.374836	-1.41567	down
ko04933	AGE-RAGE signaling pathway in diabetic complications	0.00135316	ENSRNOG00000052925	NEWGENE_621351	K06236	NA	collagen, type I, alpha 2 [Source:RGD Symbol;Acc:9452897]	98.967	66.7797	60.9449	18.46	15.0008	14.0315	4.77323	2.25497	up
ko04630	Jak-STAT signaling pathway	0.00156137	ENSRNOG00000000187	Csf2rb	K04738	NA	colony stimulating factor 2 receptor beta common subunit [Source:RGD Symbol;Acc:620189]	18.4435	13.9751	14.6689	8.13905	5.53808	7.54263	2.21904	1.14993	up
ko04630	Jak-STAT signaling pathway	0.00156137	ENSRNOG00000000521	Cdkn1a	K06625	NA	cyclin-dependent kinase inhibitor 1A [Source:RGD Symbol;Acc:69328]	60.966	98.6015	55.2437	36.6148	37.2161	27.4646	2.12064	1.0845	up
ko04630	Jak-STAT signaling pathway	0.00156137	ENSRNOG00000002244	Pdgfra	K04363	EC:2.7.10.1	platelet derived growth factor receptor alpha [Source:RGD Symbol;Acc:3284]	10.7913	10.4928	10.1398	22.5292	21.8926	24.1598	0.458196	-1.12596	down
ko04630	Jak-STAT signaling pathway	0.00156137	ENSRNOG00000004470	Il24	K22668	NA	interleukin 24 [Source:RGD Symbol;Acc:621484]	4.71744	2.76935	8.35128	0.381472	0.213099	0.210391	19.6755	4.29833	up
ko04630	Jak-STAT signaling pathway	0.00156137	ENSRNOG00000005954	Il5ra	K05067	NA	interleukin 5 receptor subunit alpha [Source:RGD Symbol;Acc:70938]	0.037047	0.036962	0.021553	0.143935	0.05033	0.188178	0.249873	-2.00074	down
ko04630	Jak-STAT signaling pathway	0.00156137	ENSRNOG00000007002	Lif	K05419	NA	LIF, interleukin 6 family cytokine [Source:RGD Symbol;Acc:620865]	2.79472	2.7336	5.46239	0.419517	0.645634	0.611047	6.55692	2.71302	up
ko04630	Jak-STAT signaling pathway	0.00156137	ENSRNOG00000007270	Il12rb2	K05064	NA	interleukin 12 receptor subunit beta 2 [Source:RGD Symbol;Acc:620026]	0.854936	0.779215	0.717746	1.59409	2.39643	2.03746	0.390164	-1.35785	down
ko04630	Jak-STAT signaling pathway	0.00156137	ENSRNOG00000007468	Ifng	K04687	NA	interferon gamma [Source:RGD Symbol;Acc:2866]	0	0	0	0.111509	0.315579	0.259981	0.000436637	-11.1613	down
ko04630	Jak-STAT signaling pathway	0.00156137	ENSRNOG00000008759	Csf3r	K05061	NA	colony stimulating factor 3 receptor [Source:RGD Symbol;Acc:1309114]	4.8101	3.47951	3.78326	8.0264	6.94395	12.168	0.444864	-1.16856	down
ko04630	Jak-STAT signaling pathway	0.00156137	ENSRNOG00000010278	Il6	K05405	NA	interleukin 6 [Source:RGD Symbol;Acc:2901]	3.16485	2.11915	11.0231	0.116354	0.115796	0.224046	35.7458	5.1597	up
ko04630	Jak-STAT signaling pathway	0.00156137	ENSRNOG00000011696	Lifr	K05058	NA	LIF receptor subunit alpha [Source:RGD Symbol;Acc:621431]	14.613	20.5057	9.77783	34.2651	45.0252	57.9032	0.32725	-1.61154	down
ko04630	Jak-STAT signaling pathway	0.00156137	ENSRNOG00000012259	Il22ra2	K05139	NA	interleukin 22 receptor subunit alpha 2 [Source:RGD Symbol;Acc:1303169]	0.262024	0.379088	0.267647	0.612504	0.932174	1.30493	0.318907	-1.64879	down
ko04630	Jak-STAT signaling pathway	0.00156137	ENSRNOG00000015354	Aox1	K00157	EC:1.2.3.1	aldehyde oxidase 1 [Source:RGD Symbol;Acc:620528]	3.60537	5.38913	2.23097	11.3222	11.3536	11.3529	0.329883	-1.59998	down
ko04630	Jak-STAT signaling pathway	0.00156137	ENSRNOG00000018461	Pdgfrb	NA	NA	platelet derived growth factor receptor beta [Source:RGD Symbol;Acc:3285]	29.9477	33.1625	27.8463	12.2108	11.6934	13.6546	2.42171	1.27603	up
ko04630	Jak-STAT signaling pathway	0.00156137	ENSRNOG00000019216	Il12rb1	K05063	NA	interleukin 12 receptor subunit beta 1 [Source:RGD Symbol;Acc:620025]	0.585973	0.344356	0.316211	1.4795	2.72557	0.888842	0.244712	-2.03084	down
ko04630	Jak-STAT signaling pathway	0.00156137	ENSRNOG00000023664	Lepr	K05062	NA	leptin receptor [Source:RGD Symbol;Acc:3001]	1.64218	1.61979	1.27077	3.58304	4.59652	3.2965	0.394973	-1.34017	down
ko04630	Jak-STAT signaling pathway	0.00156137	ENSRNOG00000028377	Mpl	K05082	NA	MPL proto-oncogene, thrombopoietin receptor [Source:RGD Symbol;Acc:1311069]	0.300416	0.171127	0.164175	0.672625	0.583904	0.639335	0.335318	-1.5764	down
ko04630	Jak-STAT signaling pathway	0.00156137	ENSRNOG00000032973	Il13ra2	K05077	NA	interleukin 13 receptor subunit alpha 2 [Source:RGD Symbol;Acc:620838]	0.829589	0.965275	0.72487	0.528699	0.130525	0.092317	3.35276	1.74535	up
ko04630	Jak-STAT signaling pathway	0.00156137	ENSRNOG00000033192	Osmr	K05057	NA	oncostatin M receptor [Source:RGD Symbol;Acc:1302983]	11.718	9.37308	19.7537	4.0249	3.86177	3.74351	3.51197	1.81228	up
ko04630	Jak-STAT signaling pathway	0.00156137	ENSRNOG00000047307	Cntfr	K05059	NA	ciliary neurotrophic factor receptor [Source:RGD Symbol;Acc:1303100]	0.496101	0.273565	0.223928	1.66573	2.19656	2.404	0.158562	-2.65688	down
ko04630	Jak-STAT signaling pathway	0.00156137	ENSRNOG00000048636	Il2rb	K05069	NA	interleukin 2 receptor subunit beta [Source:RGD Symbol;Acc:2896]	6.32093	7.65754	3.20297	18.9429	37.4261	22.1126	0.218923	-2.1915	down
ko04630	Jak-STAT signaling pathway	0.00156137	ENSRNOG00000051964	LOC108348190	K04357	NA	uncharacterized LOC108348190 [Source:RGD Symbol;Acc:11520363]	0.212498	0.315292	0.147029	0.358931	0.514377	0.568232	0.468124	-1.09504	down
ko04630	Jak-STAT signaling pathway	0.00156137	ENSRNOG00000058856	Tslp	K05436	NA	thymic stromal lymphopoietin [Source:RGD Symbol;Acc:1586479]	4.0925	4.31334	5.15534	2.10864	0.980242	2.14351	2.59177	1.37394	up
ko04630	Jak-STAT signaling pathway	0.00156137	ENSRNOG00000062125	Aox3	K00157	EC:1.2.3.1	aldehyde oxidase 3 [Source:RGD Symbol;Acc:1359328]	0.87407	1.02473	0.56828	2.35684	2.41775	3.05158	0.315235	-1.6655	down
ko04650	Natural killer cell mediated cytotoxicity	0.00331283	ENSRNOG00000000562	Prf1	K07818	NA	perforin 1 [Source:RGD Symbol;Acc:708463]	8.20777	9.31399	3.00773	32.4085	55.6601	39.4225	0.161027	-2.63463	down
ko04650	Natural killer cell mediated cytotoxicity	0.00331283	ENSRNOG00000002978	Faslg	K04389	NA	Fas ligand [Source:RGD Symbol;Acc:3880]	0.816894	1.01133	0.807977	3.43662	5.79528	3.71874	0.203558	-2.29649	down
ko04650	Natural killer cell mediated cytotoxicity	0.00331283	ENSRNOG00000003298	Cd247	K06453	NA	Cd247 molecule [Source:RGD Symbol;Acc:2305]	3.27195	2.92367	1.71789	6.18881	10.0058	6.84293	0.343505	-1.5416	down
ko04650	Natural killer cell mediated cytotoxicity	0.00331283	ENSRNOG00000004698	Cd244	K06582	NA	CD244 molecule [Source:RGD Symbol;Acc:68400]	3.35409	2.49545	2.79384	4.69091	9.29917	5.70438	0.438874	-1.18812	down
ko04650	Natural killer cell mediated cytotoxicity	0.00331283	ENSRNOG00000006263	Sh2d1a	K07990	NA	SH2 domain containing 1A [Source:RGD Symbol;Acc:1562408]	0.79055	1.06736	0.43962	3.83482	6.89779	3.36876	0.162929	-2.61768	down
ko04650	Natural killer cell mediated cytotoxicity	0.00331283	ENSRNOG00000007468	Ifng	K04687	NA	interferon gamma [Source:RGD Symbol;Acc:2866]	0	0	0	0.111509	0.315579	0.259981	0.000436637	-11.1613	down
ko04650	Natural killer cell mediated cytotoxicity	0.00331283	ENSRNOG00000008030	Shc2	K17447	NA	SHC adaptor protein 2 [Source:RGD Symbol;Acc:1307137]	1.08558	1.2228	0.495709	1.31078	2.86654	1.98796	0.45482	-1.13663	down
ko04650	Natural killer cell mediated cytotoxicity	0.00331283	ENSRNOG00000009705	Lck	K05856	EC:2.7.10.2	LCK proto-oncogene, Src family tyrosine kinase [Source:RGD Symbol;Acc:2994]	6.96253	7.70444	4.6759	11.8213	21.1914	13.3951	0.416803	-1.26256	down
ko04650	Natural killer cell mediated cytotoxicity	0.00331283	ENSRNOG00000016995	Zap70	K07360	EC:2.7.10.2	zeta chain of T cell receptor associated protein kinase 70 [Source:RGD Symbol;Acc:3983]	1.91387	2.38414	1.62197	5.55549	9.51381	5.03816	0.294417	-1.76407	down
ko04650	Natural killer cell mediated cytotoxicity	0.00331283	ENSRNOG00000017429	Lat	K07362	NA	linker for activation of T cells [Source:RGD Symbol;Acc:620802]	7.77653	7.11948	5.88298	20.675	13.8754	9.08614	0.476183	-1.07041	down
ko04650	Natural killer cell mediated cytotoxicity	0.00331283	ENSRNOG00000018458	Ncr1	K06741	NA	natural cytotoxicity triggering receptor 1 [Source:RGD Symbol;Acc:621288]	1.54927	1.5245	0.579818	5.21451	11.9914	5.65028	0.159851	-2.6452	down
ko04650	Natural killer cell mediated cytotoxicity	0.00331283	ENSRNOG00000040300	Raet1e	K07987	NA	retinoic acid early transcript 1E [Source:RGD Symbol;Acc:1311118]	0.628027	0.741478	0.610579	0	0.158824	0.186809	5.72886	2.51825	up
ko04650	Natural killer cell mediated cytotoxicity	0.00331283	ENSRNOG00000045973	Gzmb	K01353	EC:3.4.21.79	granzyme B [Source:RGD Symbol;Acc:620018]	1.2569	2.48146	1.0418	7.67971	19.0044	10.3411	0.129105	-2.95338	down
ko04650	Natural killer cell mediated cytotoxicity	0.00331283	ENSRNOG00000049976	Gzmbl2	K01353	EC:3.4.21.79	Granzyme B-like 2 [Source:RGD Symbol;Acc:2320097]	2.02426	2.40992	1.11774	7.66841	9.94887	9.79654	0.202523	-2.30384	down
ko04650	Natural killer cell mediated cytotoxicity	0.00331283	ENSRNOG00000051986	Plcg2	NA	NA	phospholipase C, gamma 2 [Source:RGD Symbol;Acc:3348]	5.19104	6.76231	4.63746	12.3585	15.9316	15.9714	0.374836	-1.41567	down
ko04650	Natural killer cell mediated cytotoxicity	0.00331283	ENSRNOG00000052467	Klrc2	K06541	NA	killer cell lectin like receptor C3 [Source:RGD Symbol;Acc:1560637]	1.9898	1.77201	1.36324	3.11778	4.56144	2.74888	0.491465	-1.02484	down
ko04650	Natural killer cell mediated cytotoxicity	0.00331283	ENSRNOG00000054371	Prkcg	K19663	EC:2.7.11.13	protein kinase C, gamma [Source:RGD Symbol;Acc:3397]	1.53377	1.93347	1.8286	3.48216	4.70262	3.15826	0.46688	-1.09888	down
ko04650	Natural killer cell mediated cytotoxicity	0.00331283	ENSRNOG00000055196	Klrc1	K06541	NA	killer cell lectin like receptor C1 [Source:RGD Symbol;Acc:2976]	0.534039	0.553248	0.120291	1.52792	2.10416	2.30476	0.203404	-2.29758	down
ko04650	Natural killer cell mediated cytotoxicity	0.00331283	ENSRNOG00000060246	Klrd1	K06516	NA	killer cell lectin like receptor D1 [Source:RGD Symbol;Acc:2978]	2.84075	4.20682	1.49137	13.655	21.5233	11.2525	0.183907	-2.44296	down
ko04650	Natural killer cell mediated cytotoxicity	0.00331283	ENSRNOG00000061739	Klrk1	K06728	NA	killer cell lectin like receptor K1 [Source:RGD Symbol;Acc:3180]	6.32432	4.17684	4.30792	9.34371	16.153	12.7948	0.386746	-1.37054	down
ko04115	p53 signaling pathway	0.00860989	ENSRNOG00000000521	Cdkn1a	K06625	NA	cyclin-dependent kinase inhibitor 1A [Source:RGD Symbol;Acc:69328]	60.966	98.6015	55.2437	36.6148	37.2161	27.4646	2.12064	1.0845	up
ko04115	p53 signaling pathway	0.00860989	ENSRNOG00000000632	Cdk1	K02087	2.7.11.23;EC:2.7.11.22	cyclin-dependent kinase 1 [Source:RGD Symbol;Acc:2319]	13.2074	15.3817	18.7413	2.64068	4.12548	3.85137	4.45776	2.15632	up
ko04115	p53 signaling pathway	0.00860989	ENSRNOG00000001414	Serpine1	NA	NA	serpin family E member 1 [Source:RGD Symbol;Acc:3249]	55.409	67.7847	164.683	7.58747	10.5169	14.5605	8.81302	3.13964	up
ko04115	p53 signaling pathway	0.00860989	ENSRNOG00000005109	Rprm	K10128	NA	reprimo, TP53 dependent G2 arrest mediator homolog [Source:RGD Symbol;Acc:1595512]	1.59934	1.59701	0.788309	0.13436	0.462554	0.42225	3.90974	1.96707	up
ko04115	p53 signaling pathway	0.00860989	ENSRNOG00000014786	Ccne1	K06626	NA	cyclin E1 [Source:RGD Symbol;Acc:2294]	1.62725	1.32867	1.53513	0.320929	0.475594	0.655549	3.09286	1.62894	up
ko04115	p53 signaling pathway	0.00860989	ENSRNOG00000016148	Gtse1	K10129	NA	G-2 and S-phase expressed 1 [Source:RGD Symbol;Acc:1563164]	3.65126	4.40783	3.11416	1.07771	1.67898	2.24873	2.23223	1.15849	up
ko04115	p53 signaling pathway	0.00860989	ENSRNOG00000033153	Sfn	K06644	NA	stratifin [Source:RGD Symbol;Acc:1304729]	22.9356	14.9716	33.5055	3.57864	3.88086	2.31316	7.3074	2.86936	up
ko04115	p53 signaling pathway	0.00860989	ENSRNOG00000045829	Thbs1	K16857	NA	thrombospondin 1 [Source:RGD Symbol;Acc:1588455]	69.4641	106.372	164.303	19.9347	19.858	26.7682	5.11019	2.35338	up
ko04115	p53 signaling pathway	0.00860989	ENSRNOG00000049471	Steap3	K10142	EC:1.16.1.-	STEAP3 metalloreductase [Source:RGD Symbol;Acc:708552]	4.4521	4.15233	4.89617	1.30142	1.31299	1.27142	3.47431	1.79673	up
ko04115	p53 signaling pathway	0.00860989	ENSRNOG00000054286	Rrm2	K10808	EC:1.17.4.1	ribonucleotide reductase regulatory subunit M2 [Source:RGD Symbol;Acc:1598310]	8.16388	9.93891	11.9198	2.25539	2.08556	3.09141	4.03944	2.01416	up
ko04115	p53 signaling pathway	0.00860989	ENSRNOG00000055111	AABR07000658	K21770	NA	cyclin B2-like [Source:NCBI gene;Acc:100364016]	5.51022	5.51102	6.25636	0.973042	1.20114	1.81881	4.32698	2.11336	up
ko04115	p53 signaling pathway	0.00860989	ENSRNOG00000058539	Ccnb1	K05868	NA	cyclin B1 [Source:RGD Symbol;Acc:2291]	6.84248	5.36905	7.00748	1.32879	2.37311	1.92021	3.41846	1.77335	up
ko04115	p53 signaling pathway	0.00860989	ENSRNOG00000059837	Cdkn2a	K06621	NA	cyclin-dependent kinase inhibitor 2A [Source:RGD Symbol;Acc:2323]	1.75201	2.25335	0.861979	0.590342	0.229968	0.204869	4.7478	2.24726	up
ko04540	Gap junction	0.00875795	ENSRNOG00000000632	Cdk1	K02087	2.7.11.23;EC:2.7.11.22	cyclin-dependent kinase 1 [Source:RGD Symbol;Acc:2319]	13.2074	15.3817	18.7413	2.64068	4.12548	3.85137	4.45776	2.15632	up
ko04540	Gap junction	0.00875795	ENSRNOG00000000805	Gja1	K07372	NA	gap junction protein, alpha 1 [Source:RGD Symbol;Acc:2690]	46.1553	43.4378	61.0475	18.0629	16.8096	17.0274	2.90252	1.5373	up
ko04540	Gap junction	0.00875795	ENSRNOG00000002244	Pdgfra	K04363	EC:2.7.10.1	platelet derived growth factor receptor alpha [Source:RGD Symbol;Acc:3284]	10.7913	10.4928	10.1398	22.5292	21.8926	24.1598	0.458196	-1.12596	down
ko04540	Gap junction	0.00875795	ENSRNOG00000002361	Prkg2	K19477	EC:2.7.11.12	protein kinase cGMP-dependent 2 [Source:RGD Symbol;Acc:3401]	0.031366	0.079933	0.107604	0	0	0.017976	12.1775	3.60615	up
ko04540	Gap junction	0.00875795	ENSRNOG00000009440	Gucy1b2	K12319	EC:4.6.1.2	guanylate cyclase 1 soluble subunit beta 2 [Source:RGD Symbol;Acc:2770]	0.0654379	0.0684079	0.0307582	0	0	0	548.68	9.09982	up
ko04540	Gap junction	0.00875795	ENSRNOG00000014290	Grm1	K04603	NA	glutamate metabotropic receptor 1 [Source:RGD Symbol;Acc:2742]	0.009912	0	0.015688	0.069331	0.104979	0.0226431	0.12998	-2.94364	down
ko04540	Gap junction	0.00875795	ENSRNOG00000017209	Tubb3	K07375	NA	tubulin, beta 3 class III [Source:RGD Symbol;Acc:628595]	2.15739	1.01563	1.76687	0.172949	0.141911	0.209047	9.42893	3.23709	up
ko04540	Gap junction	0.00875795	ENSRNOG00000018371	Tubb6	K07375	NA	tubulin, beta 6 class V [Source:RGD Symbol;Acc:1305887]	51.3781	46.6999	62.9911	21.832	20.597	17.835	2.67272	1.41831	up
ko04540	Gap junction	0.00875795	ENSRNOG00000018461	Pdgfrb	NA	NA	platelet derived growth factor receptor beta [Source:RGD Symbol;Acc:3285]	29.9477	33.1625	27.8463	12.2108	11.6934	13.6546	2.42171	1.27603	up
ko04540	Gap junction	0.00875795	ENSRNOG00000033119	Plcb4	K05858	EC:3.1.4.11	phospholipase C, beta 4 [Source:RGD Symbol;Acc:3345]	7.14989	7.94063	6.17429	13.1434	15.847	14.3553	0.490587	-1.02742	down
ko04540	Gap junction	0.00875795	ENSRNOG00000046151	Tubb1	K07375	NA	tubulin, beta 1 class VI [Source:RGD Symbol;Acc:1589557]	0.11415	0.15751	0.218594	0.872419	0.813423	0.783425	0.198542	-2.33248	down
ko04540	Gap junction	0.00875795	ENSRNOG00000048169	Tuba8	K07374	NA	tubulin, alpha 8 [Source:RGD Symbol;Acc:1566041]	3.55351	3.77764	3.98149	0.363944	0.114367	0.307022	14.4049	3.84849	up
ko04540	Gap junction	0.00875795	ENSRNOG00000051964	LOC108348190	K04357	NA	uncharacterized LOC108348190 [Source:RGD Symbol;Acc:11520363]	0.212498	0.315292	0.147029	0.358931	0.514377	0.568232	0.468124	-1.09504	down
ko04540	Gap junction	0.00875795	ENSRNOG00000054371	Prkcg	K19663	EC:2.7.11.13	protein kinase C, gamma [Source:RGD Symbol;Acc:3397]	1.53377	1.93347	1.8286	3.48216	4.70262	3.15826	0.46688	-1.09888	down
ko04540	Gap junction	0.00875795	ENSRNOG00000059479	Adcy1	K08041	EC:4.6.1.1	adenylate cyclase 1 [Source:RGD Symbol;Acc:1309318]	0.206208	0.356452	0.124273	1.28217	1.19576	1.45355	0.174726	-2.51683	down
ko00340	Histidine metabolism	0.010216	ENSRNOG00000001261	Ftcd	K13990	4.3.1.4;EC:2.1.2.5	formimidoyltransferase cyclodeaminase [Source:RGD Symbol;Acc:70915]	0.650274	0.636468	0.569455	0.190145	0.244383	0.365488	2.3202	1.21425	up
ko00340	Histidine metabolism	0.010216	ENSRNOG00000002331	Aldh3a1	K00129	EC:1.2.1.5	aldehyde dehydrogenase 3 family, member A1 [Source:RGD Symbol;Acc:2088]	0.906245	1.33741	0.734843	3.9607	3.15494	3.58458	0.278359	-1.84498	down
ko00340	Histidine metabolism	0.010216	ENSRNOG00000008575	Aoc1	K11182	EC:1.4.3.22	amine oxidase, copper containing 1 [Source:RGD Symbol;Acc:61296]	57.7855	33.0252	59.3831	5.04208	2.6436	3.20957	13.7852	3.78505	up
ko00340	Histidine metabolism	0.010216	ENSRNOG00000010262	Hdc	K01590	EC:4.1.1.22	histidine decarboxylase [Source:RGD Symbol;Acc:2790]	6.45807	2.9794	1.80826	7.50223	8.30182	10.1694	0.43297	-1.20766	down
ko00340	Histidine metabolism	0.010216	ENSRNOG00000011497	Aldh1b1	K00128	EC:1.2.1.3	aldehyde dehydrogenase 1 family, member B1 [Source:RGD Symbol;Acc:1306737]	0.047646	0.082567	0.020813	0	0	0	503.42	8.97562	up
ko00340	Histidine metabolism	0.010216	ENSRNOG00000043404	Uroc1	K01712	EC:4.2.1.49	urocanate hydratase 1 [Source:RGD Symbol;Acc:1587777]	0.088587	0.09516	0.05056	0	0	0	781.023	9.60922	up
ko05165	Human papillomavirus infection	0.0130654	ENSRNOG00000000521	Cdkn1a	K06625	NA	cyclin-dependent kinase inhibitor 1A [Source:RGD Symbol;Acc:69328]	60.966	98.6015	55.2437	36.6148	37.2161	27.4646	2.12064	1.0845	up
ko05165	Human papillomavirus infection	0.0130654	ENSRNOG00000001187	Oasl	K14608	NA	2'-5'-oligoadenylate synthetase-like [Source:RGD Symbol;Acc:1308586]	4.14041	2.51646	3.71008	4.59279	6.2404	10.5615	0.484557	-1.04526	down
ko05165	Human papillomavirus infection	0.0130654	ENSRNOG00000001249	Col6a1	K06238	NA	collagen type VI alpha 1 chain [Source:RGD Symbol;Acc:1565398]	133.697	116.137	100.859	46.125	44.8447	58.8249	2.34116	1.22722	up
ko05165	Human papillomavirus infection	0.0130654	ENSRNOG00000001254	Col6a2	K06238	NA	collagen type VI alpha 2 chain [Source:RGD Symbol;Acc:1305585]	151.096	132.236	115.094	51.6944	53.0243	62.9982	2.37559	1.24829	up
ko05165	Human papillomavirus infection	0.0130654	ENSRNOG00000002158	Ibsp	K06253	NA	integrin-binding sialoprotein [Source:RGD Symbol;Acc:2855]	2.52661	2.01495	2.65804	0.518978	0.429105	0.498763	4.97606	2.315	up
ko05165	Human papillomavirus infection	0.0130654	ENSRNOG00000002525	Ptgs2	NA	NA	prostaglandin-endoperoxide synthase 2 [Source:RGD Symbol;Acc:620349]	1.16561	3.47891	3.42764	1.65163	1.08205	1.05589	2.1301	1.09092	up
ko05165	Human papillomavirus infection	0.0130654	ENSRNOG00000002548	Tnn	K06252	NA	tenascin N [Source:RGD Symbol;Acc:1306002]	3.51992	0.787354	1.0593	0.259756	0.338104	0.237335	6.42553	2.68382	up
ko05165	Human papillomavirus infection	0.0130654	ENSRNOG00000002978	Faslg	K04389	NA	Fas ligand [Source:RGD Symbol;Acc:3880]	0.816894	1.01133	0.807977	3.43662	5.79528	3.71874	0.203558	-2.29649	down
ko05165	Human papillomavirus infection	0.0130654	ENSRNOG00000003897	Col1a1	NA	NA	collagen type I alpha 1 chain [Source:RGD Symbol;Acc:61817]	330.164	210.993	127.588	21.9343	20.0594	21.0288	10.6112	3.40752	up
ko05165	Human papillomavirus infection	0.0130654	ENSRNOG00000006569	Itgb8	K06591	NA	integrin subunit beta 8 [Source:RGD Symbol;Acc:1311374]	2.69064	1.81036	3.42008	1.06221	1.22856	0.71459	2.63565	1.39816	up
ko05165	Human papillomavirus infection	0.0130654	ENSRNOG00000006723	Itga11	K06587	NA	integrin subunit alpha 11 [Source:RGD Symbol;Acc:1311711]	2.02577	0.948998	1.43154	0.445333	0.566447	0.898136	2.30707	1.20606	up
ko05165	Human papillomavirus infection	0.0130654	ENSRNOG00000008788	Mpp5	K06091	NA	membrane palmitoylated protein 5 [Source:RGD Symbol;Acc:1308071]	13.5832	14.8236	11.9436	29.4061	30.2001	29.5302	0.452682	-1.14343	down
ko05165	Human papillomavirus infection	0.0130654	ENSRNOG00000010529	Thbs2	K04659	NA	thrombospondin 2 [Source:RGD Symbol;Acc:1310979]	16.9175	9.7328	15.9974	0.842375	0.59486	0.649489	20.4376	4.35316	up
ko05165	Human papillomavirus infection	0.0130654	ENSRNOG00000011292	NEWGENE_621351	K06236	NA	collagen, type I, alpha 2 [Source:RGD Symbol;Acc:9452897]	262.119	200.003	149.732	39.3449	35.4719	44.7937	5.11539	2.35484	up
ko05165	Human papillomavirus infection	0.0130654	ENSRNOG00000011593	Hey1	K09091	NA	hairy/enhancer-of-split related with YRPW motif 1 [Source:MGI Symbol;Acc:MGI:1341800]	12.5876	14.407	11.9215	28.1001	20.3722	34.2301	0.470556	-1.08756	down
ko05165	Human papillomavirus infection	0.0130654	ENSRNOG00000013364	Hey2	K09091	NA	hes-related family bHLH transcription factor with YRPW motif 2 [Source:RGD Symbol;Acc:621405]	2.33568	1.53529	1.36085	3.7966	3.34229	4.01539	0.469042	-1.09221	down
ko05165	Human papillomavirus infection	0.0130654	ENSRNOG00000013850	Hes5	K06055	NA	hes family bHLH transcription factor 5 [Source:RGD Symbol;Acc:621340]	0	0	0	0.366786	0.286635	0.493313	0.000261613	-11.9003	down
ko05165	Human papillomavirus infection	0.0130654	ENSRNOG00000014288	Fn1	K05717	NA	fibronectin 1 [Source:RGD Symbol;Acc:2624]	280.945	248.379	229.735	57.4707	64.5711	77.3481	3.80691	1.92862	up
ko05165	Human papillomavirus infection	0.0130654	ENSRNOG00000014385	Wnt2b	K00182	NA	Wnt family member 2B [Source:RGD Symbol;Acc:69346]	1.93844	1.91525	1.50408	7.62981	5.39889	3.48382	0.324467	-1.62386	down
ko05165	Human papillomavirus infection	0.0130654	ENSRNOG00000014786	Ccne1	K06626	NA	cyclin E1 [Source:RGD Symbol;Acc:2294]	1.62725	1.32867	1.53513	0.320929	0.475594	0.655549	3.09286	1.62894	up
ko05165	Human papillomavirus infection	0.0130654	ENSRNOG00000015318	Heyl	K09091	NA	hes-related family bHLH transcription factor with YRPW motif-like [Source:RGD Symbol;Acc:1305022]	8.62031	11.1768	6.69534	2.94339	2.74707	3.0413	3.03404	1.60124	up
ko05165	Human papillomavirus infection	0.0130654	ENSRNOG00000015423	Ccna2	K06627	NA	cyclin A2 [Source:RGD Symbol;Acc:621059]	6.5068	6.18522	6.15328	1.41045	1.83379	1.7034	3.80895	1.92939	up
ko05165	Human papillomavirus infection	0.0130654	ENSRNOG00000015618	Wnt5a	K00444	NA	Wnt family member 5A [Source:RGD Symbol;Acc:69250]	7.40085	6.90616	6.99221	3.0348	2.5955	2.2052	2.7183	1.4427	up
ko05165	Human papillomavirus infection	0.0130654	ENSRNOG00000015750	Wnt7b	K00572	NA	Wnt family member 7B [Source:RGD Symbol;Acc:1311441]	1.76975	1.41713	2.20033	0.207026	0.670733	0.684039	3.44937	1.78633	up
ko05165	Human papillomavirus infection	0.0130654	ENSRNOG00000016281	Col4a1	K06237	NA	collagen type IV alpha 1 chain [Source:RGD Symbol;Acc:1307148]	228.604	293.978	253.367	78.1782	93.3833	113.433	2.72268	1.44503	up
ko05165	Human papillomavirus infection	0.0130654	ENSRNOG00000017237	Lama1	K05637	NA	laminin subunit alpha 1 [Source:RGD Symbol;Acc:1307207]	0.012656	0.0023	0.040977	0	0	0	186.443	7.54259	up
ko05165	Human papillomavirus infection	0.0130654	ENSRNOG00000018461	Pdgfrb	NA	NA	platelet derived growth factor receptor beta [Source:RGD Symbol;Acc:3285]	29.9477	33.1625	27.8463	12.2108	11.6934	13.6546	2.42171	1.27603	up
ko05165	Human papillomavirus infection	0.0130654	ENSRNOG00000018851	Ppp2r2b	K04354	NA	protein phosphatase 2, regulatory subunit B, beta [Source:RGD Symbol;Acc:631441]	3.16847	2.77345	3.60839	1.62792	1.1151	0.816664	2.68291	1.4238	up
ko05165	Human papillomavirus infection	0.0130654	ENSRNOG00000019648	AABR07068316	K06238	NA	collagen type VI alpha 3 chain [Source:NCBI gene;Acc:367313]	40.6971	40.1941	29.747	15.4429	18.342	18.1571	2.13003	1.09088	up
ko05165	Human papillomavirus infection	0.0130654	ENSRNOG00000021441	Reln	K06249	EC:3.4.21.-	reelin [Source:RGD Symbol;Acc:3553]	1.29369	0.821935	0.847471	0.404149	0.376892	0.356867	2.60398	1.38072	up
ko05165	Human papillomavirus infection	0.0130654	ENSRNOG00000022635	Dlg2	K12075	NA	discs large MAGUK scaffold protein 2 [Source:RGD Symbol;Acc:619895]	2.22808	1.43888	1.17353	0.488068	0.348309	0.892297	2.80012	1.48549	up
ko05165	Human papillomavirus infection	0.0130654	ENSRNOG00000022784	Fzd10	K02842	NA	frizzled class receptor 10 [Source:RGD Symbol;Acc:1583825]	0.099555	0.232361	0.089789	0.016885	0.017521	0.023113	7.33158	2.87412	up
ko05165	Human papillomavirus infection	0.0130654	ENSRNOG00000023972	Col4a2	K06237	NA	collagen type IV alpha 2 chain [Source:RGD Symbol;Acc:1308085]	134.643	170.785	148.447	55.5573	64.3337	79.1798	2.27997	1.18901	up
ko05165	Human papillomavirus infection	0.0130654	ENSRNOG00000031782	Col6a4	K06238	NA	collagen, type VI, alpha 4 [Source:RGD Symbol;Acc:1564060]	1.63066	2.88537	1.2454	5.02547	6.16786	9.0251	0.284959	-1.81117	down
ko05165	Human papillomavirus infection	0.0130654	ENSRNOG00000043451	Spp1	K06250	NA	secreted phosphoprotein 1 [Source:RGD Symbol;Acc:3752]	129.555	106.043	88.3967	9.8296	1.21233	1.83191	25.1669	4.65346	up
ko05165	Human papillomavirus infection	0.0130654	ENSRNOG00000045829	Thbs1	K16857	NA	thrombospondin 1 [Source:RGD Symbol;Acc:1588455]	69.4641	106.372	164.303	19.9347	19.858	26.7682	5.11019	2.35338	up
ko05165	Human papillomavirus infection	0.0130654	ENSRNOG00000051964	LOC108348190	K04357	NA	uncharacterized LOC108348190 [Source:RGD Symbol;Acc:11520363]	0.212498	0.315292	0.147029	0.358931	0.514377	0.568232	0.468124	-1.09504	down
ko05165	Human papillomavirus infection	0.0130654	ENSRNOG00000052925	NEWGENE_621351	K06236	NA	collagen, type I, alpha 2 [Source:RGD Symbol;Acc:9452897]	98.967	66.7797	60.9449	18.46	15.0008	14.0315	4.77323	2.25497	up
ko05165	Human papillomavirus infection	0.0130654	ENSRNOG00000056129	LOC102554659	K06247	NA	laminin subunit gamma-3-like [Source:RGD Symbol;Acc:7518353]	0.143205	0.092271	0.140703	0.320804	0.459925	0.441261	0.307841	-1.69974	down
ko05165	Human papillomavirus infection	0.0130654	ENSRNOG00000058111	Itga2	K06481	NA	integrin subunit alpha 2 [Source:RGD Symbol;Acc:621632]	2.02287	2.41017	1.73864	0.541871	0.886078	0.645843	2.97604	1.57339	up
ko05165	Human papillomavirus infection	0.0130654	ENSRNOG00000058645	Tnc	K06252	NA	tenascin C [Source:RGD Symbol;Acc:621057]	32.8819	24.6221	38.6851	6.23045	5.06284	5.64608	5.67843	2.50549	up
ko05165	Human papillomavirus infection	0.0130654	ENSRNOG00000059507	Lamc3	K06247	NA	laminin subunit gamma 3 [Source:RGD Symbol;Acc:1309399]	0.642198	0.669721	0.48091	1.12057	1.16744	1.51648	0.47124	-1.08547	down
ko05340	Primary immunodeficiency	0.013848	ENSRNOG00000007178	Cd8a	K06458	NA	CD8a molecule [Source:RGD Symbol;Acc:2316]	6.78804	8.40062	2.99683	17.1877	29.9419	15.0684	0.292381	-1.77408	down
ko05340	Primary immunodeficiency	0.013848	ENSRNOG00000007664	Tnfrsf13c	K05151	NA	TNF receptor superfamily member 13C [Source:RGD Symbol;Acc:1560810]	0.348704	0.346682	0.160939	0.424374	1.26822	0.783325	0.345861	-1.53174	down
ko05340	Primary immunodeficiency	0.013848	ENSRNOG00000009705	Lck	K05856	EC:2.7.10.2	LCK proto-oncogene, Src family tyrosine kinase [Source:RGD Symbol;Acc:2994]	6.96253	7.70444	4.6759	11.8213	21.1914	13.3951	0.416803	-1.26256	down
ko05340	Primary immunodeficiency	0.013848	ENSRNOG00000015994	Cd3d	K06450	NA	CD3d molecule [Source:RGD Symbol;Acc:2304]	2.36595	1.55482	1.11031	3.79028	4.24872	4.54988	0.399646	-1.32321	down
ko05340	Primary immunodeficiency	0.013848	ENSRNOG00000016995	Zap70	K07360	EC:2.7.10.2	zeta chain of T cell receptor associated protein kinase 70 [Source:RGD Symbol;Acc:3983]	1.91387	2.38414	1.62197	5.55549	9.51381	5.03816	0.294417	-1.76407	down
ko05340	Primary immunodeficiency	0.013848	ENSRNOG00000018311	Cd19	K06465	NA	CD19 molecule [Source:RGD Symbol;Acc:1309086]	2.21263	3.85382	0.701309	6.29733	6.57261	7.80581	0.327328	-1.61119	down
ko05340	Primary immunodeficiency	0.013848	ENSRNOG00000020125	Cd79a	K06506	NA	CD79a molecule [Source:NCBI gene;Acc:100913063]	8.42119	9.76417	4.53518	18.3341	24.286	24.9955	0.336025	-1.57336	down
ko05340	Primary immunodeficiency	0.013848	ENSRNOG00000049925	Cd79al	K06506	NA	Cd79a molecule-like [Source:RGD Symbol;Acc:1598036]	5.57131	7.93722	3.64799	13.5778	15.2215	17.0725	0.37401	-1.41885	down
ko00790	Folate biosynthesis	0.0158369	ENSRNOG00000009734	Akr1b8	K00011	EC:1.1.1.21	aldo-keto reductase family 1 member B10 [Source:RGD Symbol;Acc:1308277]	4.64044	3.49528	4.00072	1.64368	1.29778	1.50315	2.7306	1.44922	up
ko00790	Folate biosynthesis	0.0158369	ENSRNOG00000011039	Gch1	K01495	EC:3.5.4.16	GTP cyclohydrolase 1 [Source:RGD Symbol;Acc:61992]	24.2456	21.4661	37.719	12.8307	12.749	11.0912	2.27513	1.18595	up
ko00790	Folate biosynthesis	0.0158369	ENSRNOG00000011672	Tph1	K00502	EC:1.14.16.4	tryptophan hydroxylase 1 [Source:RGD Symbol;Acc:3895]	1.43134	0.469753	0.182726	0.044418	0.010911	0.027473	25.1663	4.65342	up
ko00790	Folate biosynthesis	0.0158369	ENSRNOG00000013521	Dhfr	K00287	EC:1.5.1.3	dihydrofolate reductase [Source:RGD Symbol;Acc:2500]	4.22122	4.13326	5.03549	1.95547	2.08985	2.19484	2.14577	1.1015	up
ko00790	Folate biosynthesis	0.0158369	ENSRNOG00000049693	LOC108348130	NA	NA	carbonyl reductase [NADPH] 1-like [Source:RGD Symbol;Acc:11442152]	7.24281	7.17512	5.4403	2.60448	2.92941	3.18259	2.27824	1.18792	up
ko00790	Folate biosynthesis	0.0158369	ENSRNOG00000049911	LOC102556347	K00079	1.1.1.189;1.1.1.197;EC:1.1.1.184	carbonyl reductase [NADPH] 1-like [Source:RGD Symbol;Acc:7631561]	6.25328	7.7087	5.80579	2.8922	3.25204	3.50149	2.04938	1.03519	up
ko05200	Pathways in cancer	0.0159702	ENSRNOG00000000187	Csf2rb	K04738	NA	colony stimulating factor 2 receptor beta common subunit [Source:RGD Symbol;Acc:620189]	18.4435	13.9751	14.6689	8.13905	5.53808	7.54263	2.21904	1.14993	up
ko05200	Pathways in cancer	0.0159702	ENSRNOG00000000521	Cdkn1a	K06625	NA	cyclin-dependent kinase inhibitor 1A [Source:RGD Symbol;Acc:69328]	60.966	98.6015	55.2437	36.6148	37.2161	27.4646	2.12064	1.0845	up
ko05200	Pathways in cancer	0.0159702	ENSRNOG00000002244	Pdgfra	K04363	EC:2.7.10.1	platelet derived growth factor receptor alpha [Source:RGD Symbol;Acc:3284]	10.7913	10.4928	10.1398	22.5292	21.8926	24.1598	0.458196	-1.12596	down
ko05200	Pathways in cancer	0.0159702	ENSRNOG00000002418	Tgfb2	K13376	NA	transforming growth factor, beta 2 [Source:RGD Symbol;Acc:70491]	32.2616	34.4352	34.8496	12.3645	10.9716	12.4504	2.83756	1.50465	up
ko05200	Pathways in cancer	0.0159702	ENSRNOG00000002525	Ptgs2	NA	NA	prostaglandin-endoperoxide synthase 2 [Source:RGD Symbol;Acc:620349]	1.16561	3.47891	3.42764	1.65163	1.08205	1.05589	2.1301	1.09092	up
ko05200	Pathways in cancer	0.0159702	ENSRNOG00000002978	Faslg	K04389	NA	Fas ligand [Source:RGD Symbol;Acc:3880]	0.816894	1.01133	0.807977	3.43662	5.79528	3.71874	0.203558	-2.29649	down
ko05200	Pathways in cancer	0.0159702	ENSRNOG00000004488	Bdkrb1	K03915	NA	bradykinin receptor B1 [Source:RGD Symbol;Acc:620401]	0.213898	0.179507	1.7444	0	0.153112	0.038042	11.1837	3.48332	up
ko05200	Pathways in cancer	0.0159702	ENSRNOG00000005639	Ar	K08557	NA	androgen receptor [Source:RGD Symbol;Acc:2147]	0.44139	0.578004	0.220709	1.04348	0.79231	1.11291	0.420559	-1.24962	down
ko05200	Pathways in cancer	0.0159702	ENSRNOG00000005650	Pgf	K16859	NA	placental growth factor [Source:RGD Symbol;Acc:619850]	4.74821	4.86013	6.89225	1.81335	1.74628	1.74662	3.10965	1.63675	up
ko05200	Pathways in cancer	0.0159702	ENSRNOG00000005954	Il5ra	K05067	NA	interleukin 5 receptor subunit alpha [Source:RGD Symbol;Acc:70938]	0.037047	0.036962	0.021553	0.143935	0.05033	0.188178	0.249873	-2.00074	down
ko05200	Pathways in cancer	0.0159702	ENSRNOG00000007270	Il12rb2	K05064	NA	interleukin 12 receptor subunit beta 2 [Source:RGD Symbol;Acc:620026]	0.854936	0.779215	0.717746	1.59409	2.39643	2.03746	0.390164	-1.35785	down
ko05200	Pathways in cancer	0.0159702	ENSRNOG00000007468	Ifng	K04687	NA	interferon gamma [Source:RGD Symbol;Acc:2866]	0	0	0	0.111509	0.315579	0.259981	0.000436637	-11.1613	down
ko05200	Pathways in cancer	0.0159702	ENSRNOG00000008759	Csf3r	K05061	NA	colony stimulating factor 3 receptor [Source:RGD Symbol;Acc:1309114]	4.8101	3.47951	3.78326	8.0264	6.94395	12.168	0.444864	-1.16856	down
ko05200	Pathways in cancer	0.0159702	ENSRNOG00000009867	Tgfb3	K13377	NA	transforming growth factor, beta 3 [Source:RGD Symbol;Acc:3851]	28.04	20.6768	22.6266	8.0599	7.08636	6.45932	3.30208	1.72338	up
ko05200	Pathways in cancer	0.0159702	ENSRNOG00000010278	Il6	K05405	NA	interleukin 6 [Source:RGD Symbol;Acc:2901]	3.16485	2.11915	11.0231	0.116354	0.115796	0.224046	35.7458	5.1597	up
ko05200	Pathways in cancer	0.0159702	ENSRNOG00000011593	Hey1	K09091	NA	hairy/enhancer-of-split related with YRPW motif 1 [Source:MGI Symbol;Acc:MGI:1341800]	12.5876	14.407	11.9215	28.1001	20.3722	34.2301	0.470556	-1.08756	down
ko05200	Pathways in cancer	0.0159702	ENSRNOG00000013364	Hey2	K09091	NA	hes-related family bHLH transcription factor with YRPW motif 2 [Source:RGD Symbol;Acc:621405]	2.33568	1.53529	1.36085	3.7966	3.34229	4.01539	0.469042	-1.09221	down
ko05200	Pathways in cancer	0.0159702	ENSRNOG00000013850	Hes5	K06055	NA	hes family bHLH transcription factor 5 [Source:RGD Symbol;Acc:621340]	0	0	0	0.366786	0.286635	0.493313	0.000261613	-11.9003	down
ko05200	Pathways in cancer	0.0159702	ENSRNOG00000013953	Ntrk1	K03176	EC:2.7.10.1	neurotrophic receptor tyrosine kinase 1 [Source:RGD Symbol;Acc:620144]	0.089799	0.0959429	0.0319835	0.269543	0.411822	0.210092	0.244236	-2.03366	down
ko05200	Pathways in cancer	0.0159702	ENSRNOG00000014117	Hmox1	K00510	EC:1.14.14.18	heme oxygenase 1 [Source:RGD Symbol;Acc:2806]	551.077	151.281	396.168	28.4904	25.1169	27.1124	13.6091	3.7665	up
ko05200	Pathways in cancer	0.0159702	ENSRNOG00000014130	Cks2	K02219	NA	CDC28 protein kinase regulatory subunit 2 [Source:RGD Symbol;Acc:1562047]	10.9467	10.8736	11.7058	5.25151	5.01849	3.99499	2.35024	1.23281	up
ko05200	Pathways in cancer	0.0159702	ENSRNOG00000014288	Fn1	K05717	NA	fibronectin 1 [Source:RGD Symbol;Acc:2624]	280.945	248.379	229.735	57.4707	64.5711	77.3481	3.80691	1.92862	up
ko05200	Pathways in cancer	0.0159702	ENSRNOG00000014385	Wnt2b	K00182	NA	Wnt family member 2B [Source:RGD Symbol;Acc:69346]	1.93844	1.91525	1.50408	7.62981	5.39889	3.48382	0.324467	-1.62386	down
ko05200	Pathways in cancer	0.0159702	ENSRNOG00000014751	Ret	K05126	EC:2.7.10.1	ret proto-oncogene [Source:RGD Symbol;Acc:3556]	2.67711	3.95788	2.72819	6.89043	7.6607	6.25602	0.449998	-1.15201	down
ko05200	Pathways in cancer	0.0159702	ENSRNOG00000014786	Ccne1	K06626	NA	cyclin E1 [Source:RGD Symbol;Acc:2294]	1.62725	1.32867	1.53513	0.320929	0.475594	0.655549	3.09286	1.62894	up
ko05200	Pathways in cancer	0.0159702	ENSRNOG00000015260	Lpar3	K04294	NA	lysophosphatidic acid receptor 3 [Source:RGD Symbol;Acc:620565]	4.46911	5.9081	4.11901	16.6929	15.1815	12.4222	0.327254	-1.61152	down
ko05200	Pathways in cancer	0.0159702	ENSRNOG00000015318	Heyl	K09091	NA	hes-related family bHLH transcription factor with YRPW motif-like [Source:RGD Symbol;Acc:1305022]	8.62031	11.1768	6.69534	2.94339	2.74707	3.0413	3.03404	1.60124	up
ko05200	Pathways in cancer	0.0159702	ENSRNOG00000015618	Wnt5a	K00444	NA	Wnt family member 5A [Source:RGD Symbol;Acc:69250]	7.40085	6.90616	6.99221	3.0348	2.5955	2.2052	2.7183	1.4427	up
ko05200	Pathways in cancer	0.0159702	ENSRNOG00000015750	Wnt7b	K00572	NA	Wnt family member 7B [Source:RGD Symbol;Acc:1311441]	1.76975	1.41713	2.20033	0.207026	0.670733	0.684039	3.44937	1.78633	up
ko05200	Pathways in cancer	0.0159702	ENSRNOG00000016281	Col4a1	K06237	NA	collagen type IV alpha 1 chain [Source:RGD Symbol;Acc:1307148]	228.604	293.978	253.367	78.1782	93.3833	113.433	2.72268	1.44503	up
ko05200	Pathways in cancer	0.0159702	ENSRNOG00000016695	Mmp2	K01398	EC:3.4.24.24	matrix metallopeptidase 2 [Source:RGD Symbol;Acc:621316]	112.629	84.3299	76.9475	30.7938	26.2646	32.2348	3.06749	1.61706	up
ko05200	Pathways in cancer	0.0159702	ENSRNOG00000017237	Lama1	K05637	NA	laminin subunit alpha 1 [Source:RGD Symbol;Acc:1307207]	0.012656	0.0023	0.040977	0	0	0	186.443	7.54259	up
ko05200	Pathways in cancer	0.0159702	ENSRNOG00000017539	Mmp9	K01403	EC:3.4.24.35	matrix metallopeptidase 9 [Source:RGD Symbol;Acc:621320]	0.708985	0.326444	0.167858	0.688657	1.06294	1.59762	0.359274	-1.47684	down
ko05200	Pathways in cancer	0.0159702	ENSRNOG00000018461	Pdgfrb	NA	NA	platelet derived growth factor receptor beta [Source:RGD Symbol;Acc:3285]	29.9477	33.1625	27.8463	12.2108	11.6934	13.6546	2.42171	1.27603	up
ko05200	Pathways in cancer	0.0159702	ENSRNOG00000018712	Camk2a	K04515	EC:2.7.11.17	calcium/calmodulin-dependent protein kinase II alpha [Source:RGD Symbol;Acc:2261]	0.637376	1.01802	0.591485	1.83401	1.77662	1.39807	0.448596	-1.15651	down
ko05200	Pathways in cancer	0.0159702	ENSRNOG00000019017	Gstm6	K00799	EC:2.5.1.18	glutathione S-transferase, mu 6 [Source:RGD Symbol;Acc:1563391]	0.072552	0.084308	0.123574	0.465283	0.252652	0.528694	0.224954	-2.1523	down
ko05200	Pathways in cancer	0.0159702	ENSRNOG00000019216	Il12rb1	K05063	NA	interleukin 12 receptor subunit beta 1 [Source:RGD Symbol;Acc:620025]	0.585973	0.344356	0.316211	1.4795	2.72557	0.888842	0.244712	-2.03084	down
ko05200	Pathways in cancer	0.0159702	ENSRNOG00000021098	Rasgrp2	K12361	NA	RAS guanyl releasing protein 2 [Source:RGD Symbol;Acc:1311630]	8.21941	9.41176	4.73127	17.3456	22.6314	17.6577	0.388003	-1.36586	down
ko05200	Pathways in cancer	0.0159702	ENSRNOG00000021276	Bmp2	NA	NA	bone morphogenetic protein 2 [Source:RGD Symbol;Acc:2211]	3.40519	7.43167	5.53057	2.54594	1.70193	2.53326	2.41367	1.27123	up
ko05200	Pathways in cancer	0.0159702	ENSRNOG00000022784	Fzd10	K02842	NA	frizzled class receptor 10 [Source:RGD Symbol;Acc:1583825]	0.099555	0.232361	0.089789	0.016885	0.017521	0.023113	7.33158	2.87412	up
ko05200	Pathways in cancer	0.0159702	ENSRNOG00000023972	Col4a2	K06237	NA	collagen type IV alpha 2 chain [Source:RGD Symbol;Acc:1308085]	134.643	170.785	148.447	55.5573	64.3337	79.1798	2.27997	1.18901	up
ko05200	Pathways in cancer	0.0159702	ENSRNOG00000025120	Gli1	K16797	NA	GLI family zinc finger 1 [Source:RGD Symbol;Acc:621673]	3.22817	2.74387	2.02003	0.698325	0.477126	0.544131	4.64769	2.21651	up
ko05200	Pathways in cancer	0.0159702	ENSRNOG00000029980	Zbtb16	K10055	NA	zinc finger and BTB domain containing 16 [Source:RGD Symbol;Acc:727921]	2.73773	1.60881	0.909087	15.317	27.9325	29.3236	0.0724183	-3.7875	down
ko05200	Pathways in cancer	0.0159702	ENSRNOG00000030387	Kng1	K03898	NA	kininogen 1 [Source:RGD Symbol;Acc:1359376]	21.2306	13.4328	16.0391	1.66566	2.34674	4.32674	6.08007	2.60409	up
ko05200	Pathways in cancer	0.0159702	ENSRNOG00000033119	Plcb4	K05858	EC:3.1.4.11	phospholipase C, beta 4 [Source:RGD Symbol;Acc:3345]	7.14989	7.94063	6.17429	13.1434	15.847	14.3553	0.490587	-1.02742	down
ko05200	Pathways in cancer	0.0159702	ENSRNOG00000037302	Rad51	K04482	NA	RAD51 recombinase [Source:RGD Symbol;Acc:1563603]	2.11551	1.94133	3.48695	0.481172	0.544104	0.679288	4.42565	2.14589	up
ko05200	Pathways in cancer	0.0159702	ENSRNOG00000042561	Cks1b	K02219	NA	CDC28 protein kinase regulatory subunit 1B [Source:RGD Symbol;Acc:1561797]	9.1525	9.15957	11.4193	3.22174	4.03177	2.93054	2.9194	1.54567	up
ko05200	Pathways in cancer	0.0159702	ENSRNOG00000048636	Il2rb	K05069	NA	interleukin 2 receptor subunit beta [Source:RGD Symbol;Acc:2896]	6.32093	7.65754	3.20297	18.9429	37.4261	22.1126	0.218923	-2.1915	down
ko05200	Pathways in cancer	0.0159702	ENSRNOG00000049743	Gstm5	K00799	EC:2.5.1.18	glutathione S-transferase, mu 5 [Source:RGD Symbol;Acc:61964]	14.3618	10.7391	15.0375	7.82087	6.10415	5.18534	2.10035	1.07063	up
ko05200	Pathways in cancer	0.0159702	ENSRNOG00000050819	Birc5	K08731	NA	baculoviral IAP repeat-containing 5 [Source:RGD Symbol;Acc:70499]	6.52015	7.59906	9.03216	1.48435	2.46768	2.33775	3.68079	1.88002	up
ko05200	Pathways in cancer	0.0159702	ENSRNOG00000051964	LOC108348190	K04357	NA	uncharacterized LOC108348190 [Source:RGD Symbol;Acc:11520363]	0.212498	0.315292	0.147029	0.358931	0.514377	0.568232	0.468124	-1.09504	down
ko05200	Pathways in cancer	0.0159702	ENSRNOG00000051986	Plcg2	NA	NA	phospholipase C, gamma 2 [Source:RGD Symbol;Acc:3348]	5.19104	6.76231	4.63746	12.3585	15.9316	15.9714	0.374836	-1.41567	down
ko05200	Pathways in cancer	0.0159702	ENSRNOG00000052205	Fgf23	K22428	NA	fibroblast growth factor 23 [Source:RGD Symbol;Acc:620178]	0.318321	0.976255	0.694014	0	0	0	6628.63	12.6945	up
ko05200	Pathways in cancer	0.0159702	ENSRNOG00000054371	Prkcg	K19663	EC:2.7.11.13	protein kinase C, gamma [Source:RGD Symbol;Acc:3397]	1.53377	1.93347	1.8286	3.48216	4.70262	3.15826	0.46688	-1.09888	down
ko05200	Pathways in cancer	0.0159702	ENSRNOG00000056129	LOC102554659	K06247	NA	laminin subunit gamma-3-like [Source:RGD Symbol;Acc:7518353]	0.143205	0.092271	0.140703	0.320804	0.459925	0.441261	0.307841	-1.69974	down
ko05200	Pathways in cancer	0.0159702	ENSRNOG00000058111	Itga2	K06481	NA	integrin subunit alpha 2 [Source:RGD Symbol;Acc:621632]	2.02287	2.41017	1.73864	0.541871	0.886078	0.645843	2.97604	1.57339	up
ko05200	Pathways in cancer	0.0159702	ENSRNOG00000059479	Adcy1	K08041	EC:4.6.1.1	adenylate cyclase 1 [Source:RGD Symbol;Acc:1309318]	0.206208	0.356452	0.124273	1.28217	1.19576	1.45355	0.174726	-2.51683	down
ko05200	Pathways in cancer	0.0159702	ENSRNOG00000059507	Lamc3	K06247	NA	laminin subunit gamma 3 [Source:RGD Symbol;Acc:1309399]	0.642198	0.669721	0.48091	1.12057	1.16744	1.51648	0.47124	-1.08547	down
ko05200	Pathways in cancer	0.0159702	ENSRNOG00000059810	Txnrd3	K22182	EC:1.8.1.9	thioredoxin reductase 3 [Source:RGD Symbol;Acc:1308363]	9.8152	9.4471	9.28252	3.26938	2.99361	3.31977	2.97877	1.57471	up
ko05200	Pathways in cancer	0.0159702	ENSRNOG00000059837	Cdkn2a	K06621	NA	cyclin-dependent kinase inhibitor 2A [Source:RGD Symbol;Acc:2323]	1.75201	2.25335	0.861979	0.590342	0.229968	0.204869	4.7478	2.24726	up
ko04020	Calcium signaling pathway	0.0174226	ENSRNOG00000000413	Pln	K05852	NA	phospholamban [Source:RGD Symbol;Acc:619894]	2.50693	3.8037	2.06136	1.0686	1.05846	0.925892	2.74226	1.45537	up
ko04020	Calcium signaling pathway	0.0174226	ENSRNOG00000001492	Slc8a2	K05849	NA	solute carrier family 8 member A2 [Source:RGD Symbol;Acc:620194]	0.233813	0.256782	0.262259	0.0343693	0.0610045	0.134155	3.28	1.7137	up
ko04020	Calcium signaling pathway	0.0174226	ENSRNOG00000002244	Pdgfra	K04363	EC:2.7.10.1	platelet derived growth factor receptor alpha [Source:RGD Symbol;Acc:3284]	10.7913	10.4928	10.1398	22.5292	21.8926	24.1598	0.458196	-1.12596	down
ko04020	Calcium signaling pathway	0.0174226	ENSRNOG00000002969	Itpkb	K00911	EC:2.7.1.127	inositol-trisphosphate 3-kinase B [Source:RGD Symbol;Acc:2932]	21.7755	28.9128	18.3467	44.3208	46.9051	54.3518	0.474214	-1.07639	down
ko04020	Calcium signaling pathway	0.0174226	ENSRNOG00000004400	Avpr1a	K04226	NA	arginine vasopressin receptor 1A [Source:RGD Symbol;Acc:2185]	0.884247	0.991065	0.583946	2.30329	2.28827	2.50882	0.346356	-1.52967	down
ko04020	Calcium signaling pathway	0.0174226	ENSRNOG00000004488	Bdkrb1	K03915	NA	bradykinin receptor B1 [Source:RGD Symbol;Acc:620401]	0.213898	0.179507	1.7444	0	0.153112	0.038042	11.1837	3.48332	up
ko04020	Calcium signaling pathway	0.0174226	ENSRNOG00000004560	Cacna1b	K04849	NA	calcium voltage-gated channel subunit alpha1 B [Source:RGD Symbol;Acc:628852]	0.178632	0.207804	0.083371	0.0219777	0.0460863	0.0587362	3.7051	1.88951	up
ko04020	Calcium signaling pathway	0.0174226	ENSRNOG00000005853	Tacr1	K04222	NA	tachykinin receptor 1 [Source:RGD Symbol;Acc:3811]	0.962161	0.32157	1.14445	0	0.068343	0	35.5293	5.15094	up
ko04020	Calcium signaling pathway	0.0174226	ENSRNOG00000006645	Ryr3	K04963	NA	ryanodine receptor 3 [Source:RGD Symbol;Acc:68952]	0.552848	0.70992	0.557857	1.46945	1.2114	2.06304	0.383784	-1.38163	down
ko04020	Calcium signaling pathway	0.0174226	ENSRNOG00000009522	Adra1a	NA	NA	adrenoceptor alpha 1A [Source:RGD Symbol;Acc:2055]	0.443506	0.522418	0.301567	0.884054	1.07486	0.934857	0.438007	-1.19097	down
ko04020	Calcium signaling pathway	0.0174226	ENSRNOG00000012674	Adrb3	K04143	NA	adrenoceptor beta 3 [Source:RGD Symbol;Acc:2061]	0.121313	0.023431	0.203623	0	0	0	1161.22	10.1814	up
ko04020	Calcium signaling pathway	0.0174226	ENSRNOG00000013231	Ptafr	K04279	NA	platelet-activating factor receptor [Source:RGD Symbol;Acc:61897]	11.0138	10.7414	8.49307	4.64952	3.76824	5.12655	2.23329	1.15917	up
ko04020	Calcium signaling pathway	0.0174226	ENSRNOG00000014248	Erbb4	K05085	EC:2.7.10.1	erb-b2 receptor tyrosine kinase 4 [Source:RGD Symbol;Acc:620486]	0.102964	0.118757	0.047957	0.602772	0.820792	0.860173	0.118086	-3.08209	down
ko04020	Calcium signaling pathway	0.0174226	ENSRNOG00000014290	Grm1	K04603	NA	glutamate metabotropic receptor 1 [Source:RGD Symbol;Acc:2742]	0.009912	0	0.015688	0.069331	0.104979	0.0226431	0.12998	-2.94364	down
ko04020	Calcium signaling pathway	0.0174226	ENSRNOG00000017912	Atp2a3	K05853	EC:7.2.2.10	ATPase sarcoplasmic/endoplasmic reticulum Ca2+ transporting 3 [Source:RGD Symbol;Acc:2175]	12.551	16.9266	8.49169	31.6859	39.3186	38.9107	0.345441	-1.53349	down
ko04020	Calcium signaling pathway	0.0174226	ENSRNOG00000018461	Pdgfrb	NA	NA	platelet derived growth factor receptor beta [Source:RGD Symbol;Acc:3285]	29.9477	33.1625	27.8463	12.2108	11.6934	13.6546	2.42171	1.27603	up
ko04020	Calcium signaling pathway	0.0174226	ENSRNOG00000018712	Camk2a	K04515	EC:2.7.11.17	calcium/calmodulin-dependent protein kinase II alpha [Source:RGD Symbol;Acc:2261]	0.637376	1.01802	0.591485	1.83401	1.77662	1.39807	0.448596	-1.15651	down
ko04020	Calcium signaling pathway	0.0174226	ENSRNOG00000018827	LOC103694905	K04163	NA	5-hydroxytryptamine receptor 7 [Source:RGD Symbol;Acc:9265298]	0.601136	0.302224	0.67299	0.12608	0.271302	0.0872331	3.25279	1.70168	up
ko04020	Calcium signaling pathway	0.0174226	ENSRNOG00000020557	Ryr1	K04961	NA	ryanodine receptor 1 [Source:RGD Symbol;Acc:1586637]	0.0419302	0.0748344	0.0894049	0.149468	0.126131	0.169126	0.463588	-1.10908	down
ko04020	Calcium signaling pathway	0.0174226	ENSRNOG00000030269	Atp2b2	K05850	EC:7.2.2.10	ATPase plasma membrane Ca2+ transporting 2 [Source:RGD Symbol;Acc:2176]	0.0144165	0.0177611	0.0181006	0.0829795	0.0884165	0.0269138	0.253534	-1.97975	down
ko04020	Calcium signaling pathway	0.0174226	ENSRNOG00000033119	Plcb4	K05858	EC:3.1.4.11	phospholipase C, beta 4 [Source:RGD Symbol;Acc:3345]	7.14989	7.94063	6.17429	13.1434	15.847	14.3553	0.490587	-1.02742	down
ko04020	Calcium signaling pathway	0.0174226	ENSRNOG00000051986	Plcg2	NA	NA	phospholipase C, gamma 2 [Source:RGD Symbol;Acc:3348]	5.19104	6.76231	4.63746	12.3585	15.9316	15.9714	0.374836	-1.41567	down
ko04020	Calcium signaling pathway	0.0174226	ENSRNOG00000054212	Pde1a	K13755	EC:3.1.4.17	phosphodiesterase 1A [Source:RGD Symbol;Acc:68329]	2.47149	1.9009	2.38077	0.828064	0.871072	1.06546	2.44273	1.28849	up
ko04020	Calcium signaling pathway	0.0174226	ENSRNOG00000054371	Prkcg	K19663	EC:2.7.11.13	protein kinase C, gamma [Source:RGD Symbol;Acc:3397]	1.53377	1.93347	1.8286	3.48216	4.70262	3.15826	0.46688	-1.09888	down
ko04020	Calcium signaling pathway	0.0174226	ENSRNOG00000059479	Adcy1	K08041	EC:4.6.1.1	adenylate cyclase 1 [Source:RGD Symbol;Acc:1309318]	0.206208	0.356452	0.124273	1.28217	1.19576	1.45355	0.174726	-2.51683	down
ko00590	Arachidonic acid metabolism	0.0187888	ENSRNOG00000002525	Ptgs2	NA	NA	prostaglandin-endoperoxide synthase 2 [Source:RGD Symbol;Acc:620349]	1.16561	3.47891	3.42764	1.65163	1.08205	1.05589	2.1301	1.09092	up
ko00590	Arachidonic acid metabolism	0.0187888	ENSRNOG00000006320	Ptges	K15729	EC:5.3.99.3	prostaglandin E synthase [Source:RGD Symbol;Acc:62076]	2.66374	0.913633	1.41129	0.185829	0	0.04284	21.8161	4.44732	up
ko00590	Arachidonic acid metabolism	0.0187888	ENSRNOG00000006583	Hpgds	K04097	2.5.1.18;EC:5.3.99.2	hematopoietic prostaglandin D synthase [Source:RGD Symbol;Acc:69251]	1.69319	0.758445	0.936303	0.319459	0.37114	0.312633	3.37703	1.75575	up
ko00590	Arachidonic acid metabolism	0.0187888	ENSRNOG00000009597	Cyp4a1	K07425	EC:1.14.14.80	cytochrome P450, family 4, subfamily a, polypeptide 1 [Source:RGD Symbol;Acc:68945]	0.15917	0.263654	0.0812323	0.543618	0.850142	0.365403	0.286531	-1.80323	down
ko00590	Arachidonic acid metabolism	0.0187888	ENSRNOG00000009751	Gpx7	K00432	EC:1.11.1.9	glutathione peroxidase 7 [Source:RGD Symbol;Acc:1306999]	34.5535	30.8793	25.9259	12.6551	10.1213	16.1797	2.34517	1.22969	up
ko00590	Arachidonic acid metabolism	0.0187888	ENSRNOG00000010461	Gpx8	K00432	EC:1.11.1.9	glutathione peroxidase 8 [Source:RGD Symbol;Acc:1307506]	21.4849	17.7639	19.6333	10.0044	7.93017	11.1224	2.02644	1.01895	up
ko00590	Arachidonic acid metabolism	0.0187888	ENSRNOG00000012458	Cyp2e1	K07415	EC:1.14.13.-	cytochrome P450, family 2, subfamily e, polypeptide 1 [Source:RGD Symbol;Acc:2475]	1.59029	2.0422	0.503894	11.7452	14.7012	19.1101	0.090797	-3.46121	down
ko00590	Arachidonic acid metabolism	0.0187888	ENSRNOG00000015751	Cyp4f18	K17726	1.14.14.79;1.14.14.94;EC:1.14.14.78	cytochrome P450, family 4, subfamily f, polypeptide 18 [Source:RGD Symbol;Acc:1305261]	0.660932	0.495019	0.399061	1.23611	0.994513	1.41844	0.42614	-1.2306	down
ko00590	Arachidonic acid metabolism	0.0187888	ENSRNOG00000016945	Pla2g2a	NA	NA	phospholipase A2 group IIA [Source:RGD Symbol;Acc:620857]	430.776	142.041	305.208	62.6552	8.5295	13.1795	10.4076	3.37956	up
ko00590	Arachidonic acid metabolism	0.0187888	ENSRNOG00000047697	Ggt1	K18592	3.4.19.13;3.4.19.14;EC:2.3.2.2	gamma-glutamyltransferase 1 [Source:RGD Symbol;Acc:2683]	5.05386	8.31999	4.00574	2.28075	3.11226	3.13478	2.03799	1.02715	up
ko00590	Arachidonic acid metabolism	0.0187888	ENSRNOG00000049693	LOC108348130	NA	NA	carbonyl reductase [NADPH] 1-like [Source:RGD Symbol;Acc:11442152]	7.24281	7.17512	5.4403	2.60448	2.92941	3.18259	2.27824	1.18792	up
ko00590	Arachidonic acid metabolism	0.0187888	ENSRNOG00000049911	LOC102556347	K00079	1.1.1.189;1.1.1.197;EC:1.1.1.184	carbonyl reductase [NADPH] 1-like [Source:RGD Symbol;Acc:7631561]	6.25328	7.7087	5.80579	2.8922	3.25204	3.50149	2.04938	1.03519	up
ko04923	Regulation of lipolysis in adipocytes	0.020913	ENSRNOG00000001389	Irs3	K17445	NA	insulin receptor substrate 3 [Source:RGD Symbol;Acc:69317]	2.43177	2.38892	1.71038	5.37503	4.18174	3.98315	0.482357	-1.05183	down
ko04923	Regulation of lipolysis in adipocytes	0.020913	ENSRNOG00000002361	Prkg2	K19477	EC:2.7.11.12	protein kinase cGMP-dependent 2 [Source:RGD Symbol;Acc:3401]	0.031366	0.079933	0.107604	0	0	0.017976	12.1775	3.60615	up
ko04923	Regulation of lipolysis in adipocytes	0.020913	ENSRNOG00000002525	Ptgs2	NA	NA	prostaglandin-endoperoxide synthase 2 [Source:RGD Symbol;Acc:620349]	1.16561	3.47891	3.42764	1.65163	1.08205	1.05589	2.1301	1.09092	up
ko04923	Regulation of lipolysis in adipocytes	0.020913	ENSRNOG00000003442	Adora1	NA	NA	adenosine A1 receptor [Source:RGD Symbol;Acc:2048]	2.22958	2.85704	1.93044	0.530347	0.128806	0.423696	6.48019	2.69604	up
ko04923	Regulation of lipolysis in adipocytes	0.020913	ENSRNOG00000009768	LOC100912228	NA	NA	pro-neuropeptide Y-like [Source:RGD Symbol;Acc:6487865]	5.52974	7.0638	11.5309	19.3687	12.1043	22.9197	0.443523	-1.17292	down
ko04923	Regulation of lipolysis in adipocytes	0.020913	ENSRNOG00000010805	Fabp4	K08753	NA	fatty acid binding protein 4 [Source:RGD Symbol;Acc:69309]	104.025	71.6099	73.0857	29.3057	12.6426	16.5079	4.25481	2.0891	up
ko04923	Regulation of lipolysis in adipocytes	0.020913	ENSRNOG00000012674	Adrb3	K04143	NA	adrenoceptor beta 3 [Source:RGD Symbol;Acc:2061]	0.121313	0.023431	0.203623	0	0	0	1161.22	10.1814	up
ko04923	Regulation of lipolysis in adipocytes	0.020913	ENSRNOG00000014149	Npy1r	NA	NA	neuropeptide Y receptor Y1 [Source:RGD Symbol;Acc:3198]	0	0	0	0.222327	0.145005	0.166436	0.000562042	-10.797	down
ko04923	Regulation of lipolysis in adipocytes	0.020913	ENSRNOG00000046449	Npy	K05232	NA	neuropeptide Y [Source:RGD Symbol;Acc:3197]	5.83501	7.53937	12.3021	20.7918	13.0994	24.5613	0.43927	-1.18682	down
ko04923	Regulation of lipolysis in adipocytes	0.020913	ENSRNOG00000059479	Adcy1	K08041	EC:4.6.1.1	adenylate cyclase 1 [Source:RGD Symbol;Acc:1309318]	0.206208	0.356452	0.124273	1.28217	1.19576	1.45355	0.174726	-2.51683	down
ko00100	Steroid biosynthesis	0.0218269	ENSRNOG00000006787	Dhcr24	K09828	1.3.1.-;EC:1.3.1.72	24-dehydrocholesterol reductase [Source:RGD Symbol;Acc:1306529]	21.4228	23.7147	25.3242	11.6489	11.5486	11.3949	2.03691	1.02638	up
ko00100	Steroid biosynthesis	0.0218269	ENSRNOG00000007234	Cyp51	K05917	EC:1.14.14.154	cytochrome P450, family 51 [Source:RGD Symbol;Acc:2481]	39.6852	44.4193	53.1185	16.3385	15.6261	14.35	2.96284	1.56698	up
ko00100	Steroid biosynthesis	0.0218269	ENSRNOG00000009550	Sqle	NA	NA	squalene epoxidase [Source:RGD Symbol;Acc:3755]	22.9871	21.7869	26.6327	9.24737	11.5698	9.95486	2.3205	1.21444	up
ko00100	Steroid biosynthesis	0.0218269	ENSRNOG00000020776	Dhcr7	K00213	EC:1.3.1.21	7-dehydrocholesterol reductase [Source:RGD Symbol;Acc:621769]	7.09967	6.2079	8.41921	3.3248	2.93406	3.25449	2.28382	1.19145	up
ko00100	Steroid biosynthesis	0.0218269	ENSRNOG00000032297	Msmo1	K07750	EC:1.14.18.9	methylsterol monooxygenase 1 [Source:RGD Symbol;Acc:620281]	33.1363	38.0268	45.4319	17.971	19.1653	18.6672	2.08939	1.06308	up
ko05020	Prion diseases	0.0230003	ENSRNOG00000010278	Il6	K05405	NA	interleukin 6 [Source:RGD Symbol;Acc:2901]	3.16485	2.11915	11.0231	0.116354	0.115796	0.224046	35.7458	5.1597	up
ko05020	Prion diseases	0.0230003	ENSRNOG00000010906	Ccl5	K12499	NA	C-C motif chemokine ligand 5 [Source:RGD Symbol;Acc:69069]	33.6073	45.533	17.0812	161.621	269.977	147.801	0.166071	-2.59013	down
ko05020	Prion diseases	0.0230003	ENSRNOG00000012749	C1qb	NA	NA	complement C1q B chain [Source:RGD Symbol;Acc:2229]	68.8056	59.044	60.4535	22.5219	17.5828	21.0046	3.08141	1.62359	up
ko05020	Prion diseases	0.0230003	ENSRNOG00000012804	C1qc	K03988	NA	complement C1q C chain [Source:RGD Symbol;Acc:1306828]	74.9961	68.9488	69.0432	27.4504	22.6791	29.6529	2.66961	1.41663	up
ko05020	Prion diseases	0.0230003	ENSRNOG00000012807	C1qa	K03986	NA	complement C1q A chain [Source:RGD Symbol;Acc:1306716]	101.115	87.5529	87.2321	25.1176	20.886	29.14	3.67164	1.87642	up
ko05020	Prion diseases	0.0230003	ENSRNOG00000013736	C9	K04000	NA	complement C9 [Source:RGD Symbol;Acc:620319]	2.32761	1.63723	1.69646	0.095381	0.17503	0.090134	15.702	3.97288	up
ko05020	Prion diseases	0.0230003	ENSRNOG00000031890	Ncam1	K06491	NA	neural cell adhesion molecule 1 [Source:RGD Symbol;Acc:67378]	1.037	0.705121	0.814697	0.302133	0.414242	0.372198	2.34878	1.23191	up
ko04970	Salivary secretion	0.0255007	ENSRNOG00000002361	Prkg2	K19477	EC:2.7.11.12	protein kinase cGMP-dependent 2 [Source:RGD Symbol;Acc:3401]	0.031366	0.079933	0.107604	0	0	0.017976	12.1775	3.60615	up
ko04970	Salivary secretion	0.0255007	ENSRNOG00000006645	Ryr3	K04963	NA	ryanodine receptor 3 [Source:RGD Symbol;Acc:68952]	0.552848	0.70992	0.557857	1.46945	1.2114	2.06304	0.383784	-1.38163	down
ko04970	Salivary secretion	0.0255007	ENSRNOG00000007290	Atp1a2	K01539	EC:7.2.2.13	ATPase Na+/K+ transporting subunit alpha 2 [Source:RGD Symbol;Acc:2168]	1.11361	2.2107	0.439613	6.71531	7.20043	7.69308	0.174185	-2.52131	down
ko04970	Salivary secretion	0.0255007	ENSRNOG00000009440	Gucy1b2	K12319	EC:4.6.1.2	guanylate cyclase 1 soluble subunit beta 2 [Source:RGD Symbol;Acc:2770]	0.0654379	0.0684079	0.0307582	0	0	0	548.68	9.09982	up
ko04970	Salivary secretion	0.0255007	ENSRNOG00000009522	Adra1a	NA	NA	adrenoceptor alpha 1A [Source:RGD Symbol;Acc:2055]	0.443506	0.522418	0.301567	0.884054	1.07486	0.934857	0.438007	-1.19097	down
ko04970	Salivary secretion	0.0255007	ENSRNOG00000012674	Adrb3	K04143	NA	adrenoceptor beta 3 [Source:RGD Symbol;Acc:2061]	0.121313	0.023431	0.203623	0	0	0	1161.22	10.1814	up
ko04970	Salivary secretion	0.0255007	ENSRNOG00000019846	Muc5b	K13908	NA	mucin 5B, oligomeric mucus/gel-forming [Source:RGD Symbol;Acc:1561983]	2.61124	2.75078	0.604843	0.486337	0.621036	0.533809	3.63571	1.86224	up
ko04970	Salivary secretion	0.0255007	ENSRNOG00000020733	Camp	K13916	NA	cathelicidin antimicrobial peptide [Source:RGD Symbol;Acc:1559878]	1.35987	0.998778	1.40631	2.74325	2.92398	3.19669	0.42475	-1.23531	down
ko04970	Salivary secretion	0.0255007	ENSRNOG00000030269	Atp2b2	K05850	EC:7.2.2.10	ATPase plasma membrane Ca2+ transporting 2 [Source:RGD Symbol;Acc:2176]	0.0144165	0.0177611	0.0181006	0.0829795	0.0884165	0.0269138	0.253534	-1.97975	down
ko04970	Salivary secretion	0.0255007	ENSRNOG00000033119	Plcb4	K05858	EC:3.1.4.11	phospholipase C, beta 4 [Source:RGD Symbol;Acc:3345]	7.14989	7.94063	6.17429	13.1434	15.847	14.3553	0.490587	-1.02742	down
ko04970	Salivary secretion	0.0255007	ENSRNOG00000054371	Prkcg	K19663	EC:2.7.11.13	protein kinase C, gamma [Source:RGD Symbol;Acc:3397]	1.53377	1.93347	1.8286	3.48216	4.70262	3.15826	0.46688	-1.09888	down
ko04970	Salivary secretion	0.0255007	ENSRNOG00000059479	Adcy1	K08041	EC:4.6.1.1	adenylate cyclase 1 [Source:RGD Symbol;Acc:1309318]	0.206208	0.356452	0.124273	1.28217	1.19576	1.45355	0.174726	-2.51683	down
ko04972	Pancreatic secretion	0.0268014	ENSRNOG00000006878	Slc26a3	K14078	NA	solute carrier family 26 member 3 [Source:RGD Symbol;Acc:620623]	0.782861	1.16543	0.388403	3.8752	2.68098	1.62944	0.285463	-1.80862	down
ko04972	Pancreatic secretion	0.0268014	ENSRNOG00000007290	Atp1a2	K01539	EC:7.2.2.13	ATPase Na+/K+ transporting subunit alpha 2 [Source:RGD Symbol;Acc:2168]	1.11361	2.2107	0.439613	6.71531	7.20043	7.69308	0.174185	-2.52131	down
ko04972	Pancreatic secretion	0.0268014	ENSRNOG00000010935	Cpb2	K01300	EC:3.4.17.20	carboxypeptidase B2 [Source:RGD Symbol;Acc:71035]	0.66711	0.499583	0.757648	0.244928	0.291876	0.095584	3.04298	1.60548	up
ko04972	Pancreatic secretion	0.0268014	ENSRNOG00000011181	Cpa3	K08780	EC:3.4.17.1	carboxypeptidase A3 [Source:RGD Symbol;Acc:2390]	47.1511	14.3733	13.2997	1.9191	1.45637	1.13267	16.5976	4.0529	up
ko04972	Pancreatic secretion	0.0268014	ENSRNOG00000013771	Clca2	K05028	NA	chloride channel accessory 2 [Source:RGD Symbol;Acc:1304894]	2.50184	5.50497	3.12669	10.0809	13.6564	4.991	0.387543	-1.36757	down
ko04972	Pancreatic secretion	0.0268014	ENSRNOG00000016945	Pla2g2a	NA	NA	phospholipase A2 group IIA [Source:RGD Symbol;Acc:620857]	430.776	142.041	305.208	62.6552	8.5295	13.1795	10.4076	3.37956	up
ko04972	Pancreatic secretion	0.0268014	ENSRNOG00000017873	Sct	K05263	NA	secretin [Source:RGD Symbol;Acc:3643]	2.3567	3.70786	3.37265	0.308273	0.702983	0.388027	6.74431	2.75367	up
ko04972	Pancreatic secretion	0.0268014	ENSRNOG00000017912	Atp2a3	K05853	EC:7.2.2.10	ATPase sarcoplasmic/endoplasmic reticulum Ca2+ transporting 3 [Source:RGD Symbol;Acc:2175]	12.551	16.9266	8.49169	31.6859	39.3186	38.9107	0.345441	-1.53349	down
ko04972	Pancreatic secretion	0.0268014	ENSRNOG00000021619	Cela3b	K01345	EC:3.4.21.70	chymotrypsin like elastase 3B [Source:RGD Symbol;Acc:1307819]	4.59201	1.0716	1.36544	0.246158	0.14853	0	17.8091	4.15455	up
ko04972	Pancreatic secretion	0.0268014	ENSRNOG00000030269	Atp2b2	K05850	EC:7.2.2.10	ATPase plasma membrane Ca2+ transporting 2 [Source:RGD Symbol;Acc:2176]	0.0144165	0.0177611	0.0181006	0.0829795	0.0884165	0.0269138	0.253534	-1.97975	down
ko04972	Pancreatic secretion	0.0268014	ENSRNOG00000033119	Plcb4	K05858	EC:3.1.4.11	phospholipase C, beta 4 [Source:RGD Symbol;Acc:3345]	7.14989	7.94063	6.17429	13.1434	15.847	14.3553	0.490587	-1.02742	down
ko04972	Pancreatic secretion	0.0268014	ENSRNOG00000054371	Prkcg	K19663	EC:2.7.11.13	protein kinase C, gamma [Source:RGD Symbol;Acc:3397]	1.53377	1.93347	1.8286	3.48216	4.70262	3.15826	0.46688	-1.09888	down
ko04972	Pancreatic secretion	0.0268014	ENSRNOG00000055103	Cftr	K05031	EC:5.6.1.6	cystic fibrosis transmembrane conductance regulator [Source:RGD Symbol;Acc:2332]	3.08251	3.45411	2.56982	1.14851	0.941143	0.718715	3.2426	1.69715	up
ko04972	Pancreatic secretion	0.0268014	ENSRNOG00000059479	Adcy1	K08041	EC:4.6.1.1	adenylate cyclase 1 [Source:RGD Symbol;Acc:1309318]	0.206208	0.356452	0.124273	1.28217	1.19576	1.45355	0.174726	-2.51683	down
ko04972	Pancreatic secretion	0.0268014	ENSRNOG00000060831	Clca1	K05027	NA	chloride channel accessory 1 [Source:RGD Symbol;Acc:1306258]	1.62155	1.1008	0.778682	0.066168	0.138958	0.180644	9.07543	3.18197	up
ko04657	IL-17 signaling pathway	0.0306915	ENSRNOG00000000239	Ccl7	K05509	NA	C-C motif chemokine ligand 7 [Source:RGD Symbol;Acc:1359152]	14.4232	11.1589	18.1968	0.946133	0.831492	2.17106	11.087	3.47079	up
ko04657	IL-17 signaling pathway	0.0306915	ENSRNOG00000002525	Ptgs2	NA	NA	prostaglandin-endoperoxide synthase 2 [Source:RGD Symbol;Acc:620349]	1.16561	3.47891	3.42764	1.65163	1.08205	1.05589	2.1301	1.09092	up
ko04657	IL-17 signaling pathway	0.0306915	ENSRNOG00000007159	Ccl2	K14624	NA	C-C motif chemokine ligand 2 [Source:RGD Symbol;Acc:3645]	37.7066	18.9936	41.8423	1.20024	1.4775	2.90705	17.6448	4.14117	up
ko04657	IL-17 signaling pathway	0.0306915	ENSRNOG00000007335	Ccl11	NA	NA	C-C motif chemokine ligand 11 [Source:RGD Symbol;Acc:3644]	3.34409	1.3286	2.39904	6.15745	3.9376	18.2383	0.249591	-2.00236	down
ko04657	IL-17 signaling pathway	0.0306915	ENSRNOG00000007468	Ifng	K04687	NA	interferon gamma [Source:RGD Symbol;Acc:2866]	0	0	0	0.111509	0.315579	0.259981	0.000436637	-11.1613	down
ko04657	IL-17 signaling pathway	0.0306915	ENSRNOG00000010278	Il6	K05405	NA	interleukin 6 [Source:RGD Symbol;Acc:2901]	3.16485	2.11915	11.0231	0.116354	0.115796	0.224046	35.7458	5.1597	up
ko04657	IL-17 signaling pathway	0.0306915	ENSRNOG00000013973	Lcn2	K21129	NA	lipocalin 2 [Source:RGD Symbol;Acc:69408]	1594.83	895.005	2315.86	265.381	192.039	198.689	7.32455	2.87274	up
ko04657	IL-17 signaling pathway	0.0306915	ENSRNOG00000015498	Il17rb	K05165	NA	interleukin 17 receptor B [Source:RGD Symbol;Acc:1311392]	0.268123	0.552621	0.235806	0.712137	0.650552	1.55407	0.362234	-1.46501	down
ko04657	IL-17 signaling pathway	0.0306915	ENSRNOG00000015992	Ccl20	NA	NA	C-C motif chemokine ligand 20 [Source:RGD Symbol;Acc:3646]	3.55187	1.52624	2.52854	0.934769	1.07933	0.51172	3.01156	1.59051	up
ko04657	IL-17 signaling pathway	0.0306915	ENSRNOG00000016278	Ccl17	K21083	NA	C-C motif chemokine ligand 17 [Source:RGD Symbol;Acc:619924]	3.89019	6.53501	5.24364	1.31455	3.29401	1.16464	2.71406	1.44045	up
ko04657	IL-17 signaling pathway	0.0306915	ENSRNOG00000017539	Mmp9	K01403	EC:3.4.24.35	matrix metallopeptidase 9 [Source:RGD Symbol;Acc:621320]	0.708985	0.326444	0.167858	0.688657	1.06294	1.59762	0.359274	-1.47684	down
ko04657	IL-17 signaling pathway	0.0306915	ENSRNOG00000019695	Il17b	K05490	NA	interleukin 17B [Source:RGD Symbol;Acc:620614]	1.02491	1.03218	0.807308	0.063734	0.31913	0.242836	4.57791	2.19469	up
ko04657	IL-17 signaling pathway	0.0306915	ENSRNOG00000019846	Muc5b	K13908	NA	mucin 5B, oligomeric mucus/gel-forming [Source:RGD Symbol;Acc:1561983]	2.61124	2.75078	0.604843	0.486337	0.621036	0.533809	3.63571	1.86224	up
ko04657	IL-17 signaling pathway	0.0306915	ENSRNOG00000029768	Ccl12	K14624	NA	chemokine (C-C motif) ligand 12 [Source:RGD Symbol;Acc:1309255]	6.0007	2.47451	2.57848	0	0.075135	0.603588	16.286	4.02556	up
ko05332	Graft-versus-host disease	0.0330302	ENSRNOG00000000562	Prf1	K07818	NA	perforin 1 [Source:RGD Symbol;Acc:708463]	8.20777	9.31399	3.00773	32.4085	55.6601	39.4225	0.161027	-2.63463	down
ko05332	Graft-versus-host disease	0.0330302	ENSRNOG00000002978	Faslg	K04389	NA	Fas ligand [Source:RGD Symbol;Acc:3880]	0.816894	1.01133	0.807977	3.43662	5.79528	3.71874	0.203558	-2.29649	down
ko05332	Graft-versus-host disease	0.0330302	ENSRNOG00000007468	Ifng	K04687	NA	interferon gamma [Source:RGD Symbol;Acc:2866]	0	0	0	0.111509	0.315579	0.259981	0.000436637	-11.1613	down
ko05332	Graft-versus-host disease	0.0330302	ENSRNOG00000010278	Il6	K05405	NA	interleukin 6 [Source:RGD Symbol;Acc:2901]	3.16485	2.11915	11.0231	0.116354	0.115796	0.224046	35.7458	5.1597	up
ko05332	Graft-versus-host disease	0.0330302	ENSRNOG00000045973	Gzmb	K01353	EC:3.4.21.79	granzyme B [Source:RGD Symbol;Acc:620018]	1.2569	2.48146	1.0418	7.67971	19.0044	10.3411	0.129105	-2.95338	down
ko05332	Graft-versus-host disease	0.0330302	ENSRNOG00000047864	LOC108348072	K06752	NA	RT1 class II, locus DMa [Source:RGD Symbol;Acc:735053]	18.1206	19.1445	16.0483	10.0005	6.31184	7.37897	2.25034	1.17014	up
ko05332	Graft-versus-host disease	0.0330302	ENSRNOG00000049976	Gzmbl2	K01353	EC:3.4.21.79	Granzyme B-like 2 [Source:RGD Symbol;Acc:2320097]	2.02426	2.40992	1.11774	7.66841	9.94887	9.79654	0.202523	-2.30384	down
ko05332	Graft-versus-host disease	0.0330302	ENSRNOG00000055196	Klrc1	K06541	NA	killer cell lectin like receptor C1 [Source:RGD Symbol;Acc:2976]	0.534039	0.553248	0.120291	1.52792	2.10416	2.30476	0.203404	-2.29758	down
ko05332	Graft-versus-host disease	0.0330302	ENSRNOG00000060246	Klrd1	K06516	NA	killer cell lectin like receptor D1 [Source:RGD Symbol;Acc:2978]	2.84075	4.20682	1.49137	13.655	21.5233	11.2525	0.183907	-2.44296	down
ko04978	Mineral absorption	0.0368913	ENSRNOG00000000017	Steap1	K14737	EC:1.16.1.-	STEAP family member 1 [Source:RGD Symbol;Acc:1311543]	1.40189	0.743856	3.78576	0.298139	0.147005	0.119957	10.4964	3.39182	up
ko04978	Mineral absorption	0.0368913	ENSRNOG00000006878	Slc26a3	K14078	NA	solute carrier family 26 member 3 [Source:RGD Symbol;Acc:620623]	0.782861	1.16543	0.388403	3.8752	2.68098	1.62944	0.285463	-1.80862	down
ko04978	Mineral absorption	0.0368913	ENSRNOG00000007290	Atp1a2	K01539	EC:7.2.2.13	ATPase Na+/K+ transporting subunit alpha 2 [Source:RGD Symbol;Acc:2168]	1.11361	2.2107	0.439613	6.71531	7.20043	7.69308	0.174185	-2.52131	down
ko04978	Mineral absorption	0.0368913	ENSRNOG00000014117	Hmox1	K00510	EC:1.14.14.18	heme oxygenase 1 [Source:RGD Symbol;Acc:2806]	551.077	151.281	396.168	28.4904	25.1169	27.1124	13.6091	3.7665	up
ko04978	Mineral absorption	0.0368913	ENSRNOG00000017775	Slc5a1	K14158	NA	solute carrier family 5 member 1 [Source:RGD Symbol;Acc:3713]	2.87528	4.73317	3.87475	10.0856	8.08971	9.71798	0.411683	-1.28039	down
ko04978	Mineral absorption	0.0368913	ENSRNOG00000031506	Ftl1	K13625	NA	ferritin light chain 1 [Source:RGD Symbol;Acc:61813]	78.8034	54.0738	79.2597	41.1022	31.807	30.2894	2.05562	1.03957	up
ko04978	Mineral absorption	0.0368913	ENSRNOG00000038047	Mt1	K14739	NA	metallothionein 1 [Source:RGD Symbol;Acc:3117]	8.30167	8.65379	12.481	1.8316	1.5196	2.25298	5.25258	2.39303	up
ko04978	Mineral absorption	0.0368913	ENSRNOG00000043098	Mt2A	K14739	NA	metallothionein 2A [Source:RGD Symbol;Acc:1592345]	46.8268	38.1857	98.9606	15.6246	11.3515	13.8332	4.50812	2.17253	up
ko00280	Valine, leucine and isoleucine degradation	0.0369375	ENSRNOG00000002636	Abat	K13524	2.6.1.22;EC:2.6.1.19	4-aminobutyrate aminotransferase [Source:RGD Symbol;Acc:620948]	0.050641	0.092212	0.036326	0.388185	0.10771	0.25824	0.237595	-2.07342	down
ko00280	Valine, leucine and isoleucine degradation	0.0369375	ENSRNOG00000011497	Aldh1b1	K00128	EC:1.2.1.3	aldehyde dehydrogenase 1 family, member B1 [Source:RGD Symbol;Acc:1306737]	0.047646	0.082567	0.020813	0	0	0	503.42	8.97562	up
ko00280	Valine, leucine and isoleucine degradation	0.0369375	ENSRNOG00000015354	Aox1	K00157	EC:1.2.3.1	aldehyde oxidase 1 [Source:RGD Symbol;Acc:620528]	3.60537	5.38913	2.23097	11.3222	11.3536	11.3529	0.329883	-1.59998	down
ko00280	Valine, leucine and isoleucine degradation	0.0369375	ENSRNOG00000015514	Bcat1	NA	NA	branched chain amino acid transaminase 1 [Source:RGD Symbol;Acc:2195]	12.5295	6.97787	11.6416	3.25827	4.57393	2.91629	2.89799	1.53505	up
ko00280	Valine, leucine and isoleucine degradation	0.0369375	ENSRNOG00000016552	Hmgcs1	NA	NA	3-hydroxy-3-methylglutaryl-CoA synthase 1 [Source:RGD Symbol;Acc:70970]	34.5157	42.0386	47.789	17.4676	15.7994	17.4432	2.45203	1.29398	up
ko00280	Valine, leucine and isoleucine degradation	0.0369375	ENSRNOG00000019120	Hmgcs2	K01641	EC:2.3.3.10	3-hydroxy-3-methylglutaryl-CoA synthase 2 [Source:RGD Symbol;Acc:2804]	5.71888	6.61347	2.53401	15.7508	13.4292	15.6114	0.331902	-1.59117	down
ko00280	Valine, leucine and isoleucine degradation	0.0369375	ENSRNOG00000019189	Acat2	K00626	EC:2.3.1.9	acetyl-CoA acetyltransferase 2 [Source:RGD Symbol;Acc:1359366]	7.37918	6.24791	9.42248	2.62881	2.58117	2.8686	2.85317	1.51257	up
ko00280	Valine, leucine and isoleucine degradation	0.0369375	ENSRNOG00000043116	RGD1308564	K03334	EC:1.4.3.2	similar to L-amino acid oxidase 1 [Source:RGD Symbol;Acc:1308564]	0.026424	0	0	0.340514	0.096658	0.17216	0.0433655	-4.52731	down
ko00280	Valine, leucine and isoleucine degradation	0.0369375	ENSRNOG00000062125	Aox3	K00157	EC:1.2.3.1	aldehyde oxidase 3 [Source:RGD Symbol;Acc:1359328]	0.87407	1.02473	0.56828	2.35684	2.41775	3.05158	0.315235	-1.6655	down
ko05204	Chemical carcinogenesis	0.0386561	ENSRNOG00000002331	Aldh3a1	K00129	EC:1.2.1.5	aldehyde dehydrogenase 3 family, member A1 [Source:RGD Symbol;Acc:2088]	0.906245	1.33741	0.734843	3.9607	3.15494	3.58458	0.278359	-1.84498	down
ko05204	Chemical carcinogenesis	0.0386561	ENSRNOG00000002525	Ptgs2	NA	NA	prostaglandin-endoperoxide synthase 2 [Source:RGD Symbol;Acc:620349]	1.16561	3.47891	3.42764	1.65163	1.08205	1.05589	2.1301	1.09092	up
ko05204	Chemical carcinogenesis	0.0386561	ENSRNOG00000006583	Hpgds	K04097	2.5.1.18;EC:5.3.99.2	hematopoietic prostaglandin D synthase [Source:RGD Symbol;Acc:69251]	1.69319	0.758445	0.936303	0.319459	0.37114	0.312633	3.37703	1.75575	up
ko05204	Chemical carcinogenesis	0.0386561	ENSRNOG00000012458	Cyp2e1	K07415	EC:1.14.13.-	cytochrome P450, family 2, subfamily e, polypeptide 1 [Source:RGD Symbol;Acc:2475]	1.59029	2.0422	0.503894	11.7452	14.7012	19.1101	0.090797	-3.46121	down
ko05204	Chemical carcinogenesis	0.0386561	ENSRNOG00000019017	Gstm6	K00799	EC:2.5.1.18	glutathione S-transferase, mu 6 [Source:RGD Symbol;Acc:1563391]	0.072552	0.084308	0.123574	0.465283	0.252652	0.528694	0.224954	-2.1523	down
ko05204	Chemical carcinogenesis	0.0386561	ENSRNOG00000019342	Sult1a1	K01014	EC:2.8.2.1	sulfotransferase family 1A member 1 [Source:RGD Symbol;Acc:3767]	63.889	69.0103	69.1546	233.259	234.085	245.237	0.283552	-1.81831	down
ko05204	Chemical carcinogenesis	0.0386561	ENSRNOG00000032959	Adh7	K13951	EC:1.1.1.1	alcohol dehydrogenase 7 (class IV), mu or sigma polypeptide [Source:RGD Symbol;Acc:621638]	2.43511	3.44985	1.51791	5.94367	5.77427	4.45965	0.457601	-1.12784	down
ko05204	Chemical carcinogenesis	0.0386561	ENSRNOG00000046643	Cyp3a9	K07424	EC:1.14.14.1	cytochrome P450, family 3, subfamily a, polypeptide 9 [Source:RGD Symbol;Acc:708392]	1.53291	1.42943	1.53715	3.08589	4.81783	3.05246	0.41068	-1.28391	down
ko05204	Chemical carcinogenesis	0.0386561	ENSRNOG00000049693	LOC108348130	NA	NA	carbonyl reductase [NADPH] 1-like [Source:RGD Symbol;Acc:11442152]	7.24281	7.17512	5.4403	2.60448	2.92941	3.18259	2.27824	1.18792	up
ko05204	Chemical carcinogenesis	0.0386561	ENSRNOG00000049743	Gstm5	K00799	EC:2.5.1.18	glutathione S-transferase, mu 5 [Source:RGD Symbol;Acc:61964]	14.3618	10.7391	15.0375	7.82087	6.10415	5.18534	2.10035	1.07063	up
ko05204	Chemical carcinogenesis	0.0386561	ENSRNOG00000049911	LOC102556347	K00079	1.1.1.189;1.1.1.197;EC:1.1.1.184	carbonyl reductase [NADPH] 1-like [Source:RGD Symbol;Acc:7631561]	6.25328	7.7087	5.80579	2.8922	3.25204	3.50149	2.04938	1.03519	up
ko00072	Synthesis and degradation of ketone bodies	0.0386704	ENSRNOG00000016552	Hmgcs1	NA	NA	3-hydroxy-3-methylglutaryl-CoA synthase 1 [Source:RGD Symbol;Acc:70970]	34.5157	42.0386	47.789	17.4676	15.7994	17.4432	2.45203	1.29398	up
ko00072	Synthesis and degradation of ketone bodies	0.0386704	ENSRNOG00000019120	Hmgcs2	K01641	EC:2.3.3.10	3-hydroxy-3-methylglutaryl-CoA synthase 2 [Source:RGD Symbol;Acc:2804]	5.71888	6.61347	2.53401	15.7508	13.4292	15.6114	0.331902	-1.59117	down
ko00072	Synthesis and degradation of ketone bodies	0.0386704	ENSRNOG00000019189	Acat2	K00626	EC:2.3.1.9	acetyl-CoA acetyltransferase 2 [Source:RGD Symbol;Acc:1359366]	7.37918	6.24791	9.42248	2.62881	2.58117	2.8686	2.85317	1.51257	up
ko00900	Terpenoid backbone biosynthesis	0.0396859	ENSRNOG00000013376	Mvd	K01597	EC:4.1.1.33	mevalonate diphosphate decarboxylase [Source:RGD Symbol;Acc:621292]	9.65513	10.9672	12.0106	5.39337	6.07306	4.29109	2.07094	1.05029	up
ko00900	Terpenoid backbone biosynthesis	0.0396859	ENSRNOG00000016552	Hmgcs1	NA	NA	3-hydroxy-3-methylglutaryl-CoA synthase 1 [Source:RGD Symbol;Acc:70970]	34.5157	42.0386	47.789	17.4676	15.7994	17.4432	2.45203	1.29398	up
ko00900	Terpenoid backbone biosynthesis	0.0396859	ENSRNOG00000016690	Idi1	K01823	EC:5.3.3.2	isopentenyl-diphosphate delta isomerase 1 [Source:RGD Symbol;Acc:621835]	18.2476	18.1584	25.9308	7.3888	8.00113	8.23661	2.63842	1.39968	up
ko00900	Terpenoid backbone biosynthesis	0.0396859	ENSRNOG00000019120	Hmgcs2	K01641	EC:2.3.3.10	3-hydroxy-3-methylglutaryl-CoA synthase 2 [Source:RGD Symbol;Acc:2804]	5.71888	6.61347	2.53401	15.7508	13.4292	15.6114	0.331902	-1.59117	down
ko00900	Terpenoid backbone biosynthesis	0.0396859	ENSRNOG00000019189	Acat2	K00626	EC:2.3.1.9	acetyl-CoA acetyltransferase 2 [Source:RGD Symbol;Acc:1359366]	7.37918	6.24791	9.42248	2.62881	2.58117	2.8686	2.85317	1.51257	up
ko05143	African trypanosomiasis	0.0463965	ENSRNOG00000002723	Sele	K06494	NA	selectin E [Source:RGD Symbol;Acc:3654]	2.98187	1.19921	3.6168	0.289072	0.400788	0.3301	7.64528	2.93457	up
ko05143	African trypanosomiasis	0.0463965	ENSRNOG00000002978	Faslg	K04389	NA	Fas ligand [Source:RGD Symbol;Acc:3880]	0.816894	1.01133	0.807977	3.43662	5.79528	3.71874	0.203558	-2.29649	down
ko05143	African trypanosomiasis	0.0463965	ENSRNOG00000007468	Ifng	K04687	NA	interferon gamma [Source:RGD Symbol;Acc:2866]	0	0	0	0.111509	0.315579	0.259981	0.000436637	-11.1613	down
ko05143	African trypanosomiasis	0.0463965	ENSRNOG00000010278	Il6	K05405	NA	interleukin 6 [Source:RGD Symbol;Acc:2901]	3.16485	2.11915	11.0231	0.116354	0.115796	0.224046	35.7458	5.1597	up
ko05143	African trypanosomiasis	0.0463965	ENSRNOG00000030387	Kng1	K03898	NA	kininogen 1 [Source:RGD Symbol;Acc:1359376]	21.2306	13.4328	16.0391	1.66566	2.34674	4.32674	6.08007	2.60409	up
ko05143	African trypanosomiasis	0.0463965	ENSRNOG00000033119	Plcb4	K05858	EC:3.1.4.11	phospholipase C, beta 4 [Source:RGD Symbol;Acc:3345]	7.14989	7.94063	6.17429	13.1434	15.847	14.3553	0.490587	-1.02742	down
ko05143	African trypanosomiasis	0.0463965	ENSRNOG00000054371	Prkcg	K19663	EC:2.7.11.13	protein kinase C, gamma [Source:RGD Symbol;Acc:3397]	1.53377	1.93347	1.8286	3.48216	4.70262	3.15826	0.46688	-1.09888	down
ko00380	Tryptophan metabolism	0.0465473	ENSRNOG00000008575	Aoc1	K11182	EC:1.4.3.22	amine oxidase, copper containing 1 [Source:RGD Symbol;Acc:61296]	57.7855	33.0252	59.3831	5.04208	2.6436	3.20957	13.7852	3.78505	up
ko00380	Tryptophan metabolism	0.0465473	ENSRNOG00000011250	Inmt	K00562	2.1.1.96;EC:2.1.1.49	indolethylamine N-methyltransferase [Source:RGD Symbol;Acc:1597087]	3.66093	5.49999	4.98651	24.0863	24.6536	26.4062	0.188266	-2.40916	down
ko00380	Tryptophan metabolism	0.0465473	ENSRNOG00000011497	Aldh1b1	K00128	EC:1.2.1.3	aldehyde dehydrogenase 1 family, member B1 [Source:RGD Symbol;Acc:1306737]	0.047646	0.082567	0.020813	0	0	0	503.42	8.97562	up
ko00380	Tryptophan metabolism	0.0465473	ENSRNOG00000011672	Tph1	K00502	EC:1.14.16.4	tryptophan hydroxylase 1 [Source:RGD Symbol;Acc:3895]	1.43134	0.469753	0.182726	0.044418	0.010911	0.027473	25.1663	4.65342	up
ko00380	Tryptophan metabolism	0.0465473	ENSRNOG00000015354	Aox1	K00157	EC:1.2.3.1	aldehyde oxidase 1 [Source:RGD Symbol;Acc:620528]	3.60537	5.38913	2.23097	11.3222	11.3536	11.3529	0.329883	-1.59998	down
ko00380	Tryptophan metabolism	0.0465473	ENSRNOG00000019189	Acat2	K00626	EC:2.3.1.9	acetyl-CoA acetyltransferase 2 [Source:RGD Symbol;Acc:1359366]	7.37918	6.24791	9.42248	2.62881	2.58117	2.8686	2.85317	1.51257	up
ko00380	Tryptophan metabolism	0.0465473	ENSRNOG00000043116	RGD1308564	K03334	EC:1.4.3.2	similar to L-amino acid oxidase 1 [Source:RGD Symbol;Acc:1308564]	0.026424	0	0	0.340514	0.096658	0.17216	0.0433655	-4.52731	down
ko00380	Tryptophan metabolism	0.0465473	ENSRNOG00000062125	Aox3	K00157	EC:1.2.3.1	aldehyde oxidase 3 [Source:RGD Symbol;Acc:1359328]	0.87407	1.02473	0.56828	2.35684	2.41775	3.05158	0.315235	-1.6655	down
ko04640	Hematopoietic cell lineage	0.0485185	ENSRNOG00000005954	Il5ra	K05067	NA	interleukin 5 receptor subunit alpha [Source:RGD Symbol;Acc:70938]	0.037047	0.036962	0.021553	0.143935	0.05033	0.188178	0.249873	-2.00074	down
ko04640	Hematopoietic cell lineage	0.0485185	ENSRNOG00000007178	Cd8a	K06458	NA	CD8a molecule [Source:RGD Symbol;Acc:2316]	6.78804	8.40062	2.99683	17.1877	29.9419	15.0684	0.292381	-1.77408	down
ko04640	Hematopoietic cell lineage	0.0485185	ENSRNOG00000008759	Csf3r	K05061	NA	colony stimulating factor 3 receptor [Source:RGD Symbol;Acc:1309114]	4.8101	3.47951	3.78326	8.0264	6.94395	12.168	0.444864	-1.16856	down
ko04640	Hematopoietic cell lineage	0.0485185	ENSRNOG00000010278	Il6	K05405	NA	interleukin 6 [Source:RGD Symbol;Acc:2901]	3.16485	2.11915	11.0231	0.116354	0.115796	0.224046	35.7458	5.1597	up
ko04640	Hematopoietic cell lineage	0.0485185	ENSRNOG00000015994	Cd3d	K06450	NA	CD3d molecule [Source:RGD Symbol;Acc:2304]	2.36595	1.55482	1.11031	3.79028	4.24872	4.54988	0.399646	-1.32321	down
ko04640	Hematopoietic cell lineage	0.0485185	ENSRNOG00000018311	Cd19	K06465	NA	CD19 molecule [Source:RGD Symbol;Acc:1309086]	2.21263	3.85382	0.701309	6.29733	6.57261	7.80581	0.327328	-1.61119	down
ko04640	Hematopoietic cell lineage	0.0485185	ENSRNOG00000020872	Cd5	K06455	NA	Cd5 molecule [Source:RGD Symbol;Acc:2309]	1.31989	1.78453	0.988091	2.41024	3.58804	2.67734	0.471726	-1.08398	down
ko04640	Hematopoietic cell lineage	0.0485185	ENSRNOG00000020945	Ms4a1	K06466	NA	membrane spanning 4-domains A1 [Source:RGD Symbol;Acc:1311999]	4.43913	5.71531	1.88153	8.95523	11.7632	12.6719	0.360463	-1.47208	down
ko04640	Hematopoietic cell lineage	0.0485185	ENSRNOG00000021499	Siglech	K06473	NA	sialic acid binding Ig-like lectin H [Source:RGD Symbol;Acc:1310401]	0.452501	0.5536	0.363721	1.38958	1.72076	1.2407	0.314827	-1.66737	down
ko04640	Hematopoietic cell lineage	0.0485185	ENSRNOG00000024000	Cd22	K06467	NA	CD22 molecule [Source:RGD Symbol;Acc:1311610]	1.79374	2.41713	1.90355	4.4542	6.11548	6.36242	0.361114	-1.46947	down
ko04640	Hematopoietic cell lineage	0.0485185	ENSRNOG00000034164	Cr2	K04012	NA	complement C3d receptor 2 [Source:RGD Symbol;Acc:1310065]	0.230317	0.706351	0.165545	1.71495	1.52249	1.68717	0.223817	-2.15961	down
ko04640	Hematopoietic cell lineage	0.0485185	ENSRNOG00000047864	LOC108348072	K06752	NA	RT1 class II, locus DMa [Source:RGD Symbol;Acc:735053]	18.1206	19.1445	16.0483	10.0005	6.31184	7.37897	2.25034	1.17014	up
ko04640	Hematopoietic cell lineage	0.0485185	ENSRNOG00000058111	Itga2	K06481	NA	integrin subunit alpha 2 [Source:RGD Symbol;Acc:621632]	2.02287	2.41017	1.73864	0.541871	0.886078	0.645843	2.97604	1.57339	up
ko04924	Renin secretion	0.050487	ENSRNOG00000002361	Prkg2	K19477	EC:2.7.11.12	protein kinase cGMP-dependent 2 [Source:RGD Symbol;Acc:3401]	0.031366	0.079933	0.107604	0	0	0.017976	12.1775	3.60615	up
ko04924	Renin secretion	0.050487	ENSRNOG00000002937	Ren	K01380	EC:3.4.23.15	renin [Source:RGD Symbol;Acc:3554]	0.210662	0.122506	0	0	0	0	1110.56	10.1171	up
ko04924	Renin secretion	0.050487	ENSRNOG00000003442	Adora1	NA	NA	adenosine A1 receptor [Source:RGD Symbol;Acc:2048]	2.22958	2.85704	1.93044	0.530347	0.128806	0.423696	6.48019	2.69604	up
ko04924	Renin secretion	0.050487	ENSRNOG00000007467	Ace3	K01283	EC:3.4.15.1	angiotensin I converting enzyme (peptidyl-dipeptidase A) 3 [Source:RGD Symbol;Acc:1561299]	0.356023	1.00323	0.275359	2.20798	2.82272	2.16244	0.227246	-2.13767	down
ko04924	Renin secretion	0.050487	ENSRNOG00000009440	Gucy1b2	K12319	EC:4.6.1.2	guanylate cyclase 1 soluble subunit beta 2 [Source:RGD Symbol;Acc:2770]	0.0654379	0.0684079	0.0307582	0	0	0	548.68	9.09982	up
ko04924	Renin secretion	0.050487	ENSRNOG00000012674	Adrb3	K04143	NA	adrenoceptor beta 3 [Source:RGD Symbol;Acc:2061]	0.121313	0.023431	0.203623	0	0	0	1161.22	10.1814	up
ko04924	Renin secretion	0.050487	ENSRNOG00000013771	Clca2	K05028	NA	chloride channel accessory 2 [Source:RGD Symbol;Acc:1304894]	2.50184	5.50497	3.12669	10.0809	13.6564	4.991	0.387543	-1.36757	down
ko04924	Renin secretion	0.050487	ENSRNOG00000033119	Plcb4	K05858	EC:3.1.4.11	phospholipase C, beta 4 [Source:RGD Symbol;Acc:3345]	7.14989	7.94063	6.17429	13.1434	15.847	14.3553	0.490587	-1.02742	down
ko04924	Renin secretion	0.050487	ENSRNOG00000054212	Pde1a	K13755	EC:3.1.4.17	phosphodiesterase 1A [Source:RGD Symbol;Acc:68329]	2.47149	1.9009	2.38077	0.828064	0.871072	1.06546	2.44273	1.28849	up
ko04924	Renin secretion	0.050487	ENSRNOG00000060831	Clca1	K05027	NA	chloride channel accessory 1 [Source:RGD Symbol;Acc:1306258]	1.62155	1.1008	0.778682	0.066168	0.138958	0.180644	9.07543	3.18197	up
ko04924	Renin secretion	0.050487	ENSRNOG00000062101	Ace	K01283	EC:3.4.15.1	angiotensin I converting enzyme [Source:RGD Symbol;Acc:2493]	116.54	162.976	113.041	251.855	283.285	379.239	0.429316	-1.21989	down
ko05412	Arrhythmogenic right ventricular cardiomyopathy (ARVC)	0.050487	ENSRNOG00000000805	Gja1	K07372	NA	gap junction protein, alpha 1 [Source:RGD Symbol;Acc:2690]	46.1553	43.4378	61.0475	18.0629	16.8096	17.0274	2.90252	1.5373	up
ko05412	Arrhythmogenic right ventricular cardiomyopathy (ARVC)	0.050487	ENSRNOG00000003245	Cacng1	NA	NA	calcium voltage-gated channel auxiliary subunit gamma 1 [Source:RGD Symbol;Acc:2249]	0.342541	0.070667	0.216756	0.041472	0	0	15.1901	3.92506	up
ko05412	Arrhythmogenic right ventricular cardiomyopathy (ARVC)	0.050487	ENSRNOG00000003998	Sgca	K12565	NA	sarcoglycan, alpha [Source:RGD Symbol;Acc:1308062]	2.86595	3.15146	2.51249	0.916284	2.09906	1.11714	2.06411	1.04552	up
ko05412	Arrhythmogenic right ventricular cardiomyopathy (ARVC)	0.050487	ENSRNOG00000006569	Itgb8	K06591	NA	integrin subunit beta 8 [Source:RGD Symbol;Acc:1311374]	2.69064	1.81036	3.42008	1.06221	1.22856	0.71459	2.63565	1.39816	up
ko05412	Arrhythmogenic right ventricular cardiomyopathy (ARVC)	0.050487	ENSRNOG00000006723	Itga11	K06587	NA	integrin subunit alpha 11 [Source:RGD Symbol;Acc:1311711]	2.02577	0.948998	1.43154	0.445333	0.566447	0.898136	2.30707	1.20606	up
ko05412	Arrhythmogenic right ventricular cardiomyopathy (ARVC)	0.050487	ENSRNOG00000007666	Cacnb4	K04865	NA	calcium voltage-gated channel auxiliary subunit beta 4 [Source:RGD Symbol;Acc:68385]	0.231166	0.227915	0.115713	0.714819	1.19904	0.551053	0.23319	-2.10042	down
ko05412	Arrhythmogenic right ventricular cardiomyopathy (ARVC)	0.050487	ENSRNOG00000014603	Sgcg	K12564	NA	sarcoglycan, gamma [Source:RGD Symbol;Acc:1359577]	13.5611	9.46866	11.7961	1.57006	3.5042	3.33878	4.13951	2.04946	up
ko05412	Arrhythmogenic right ventricular cardiomyopathy (ARVC)	0.050487	ENSRNOG00000017833	Actn2	K21073	NA	actinin alpha 2 [Source:RGD Symbol;Acc:1308097]	0.014556	0.085251	0.118502	0.888662	0.114628	0.322218	0.164698	-2.6021	down
ko05412	Arrhythmogenic right ventricular cardiomyopathy (ARVC)	0.050487	ENSRNOG00000019810	Des	K07610	NA	desmin [Source:RGD Symbol;Acc:620686]	92.8023	102.513	108.876	30.2923	29.057	31.5052	3.34812	1.74335	up
ko05412	Arrhythmogenic right ventricular cardiomyopathy (ARVC)	0.050487	ENSRNOG00000054274	Cacnb3	NA	NA	calcium voltage-gated channel auxiliary subunit beta 3 [Source:RGD Symbol;Acc:2248]	12.6099	10.2322	7.67604	5.49561	3.55387	4.34237	2.27886	1.18831	up
ko05412	Arrhythmogenic right ventricular cardiomyopathy (ARVC)	0.050487	ENSRNOG00000058111	Itga2	K06481	NA	integrin subunit alpha 2 [Source:RGD Symbol;Acc:621632]	2.02287	2.41017	1.73864	0.541871	0.886078	0.645843	2.97604	1.57339	up
ko04066	HIF-1 signaling pathway	0.0563776	ENSRNOG00000000521	Cdkn1a	K06625	NA	cyclin-dependent kinase inhibitor 1A [Source:RGD Symbol;Acc:69328]	60.966	98.6015	55.2437	36.6148	37.2161	27.4646	2.12064	1.0845	up
ko04066	HIF-1 signaling pathway	0.0563776	ENSRNOG00000001414	Serpine1	NA	NA	serpin family E member 1 [Source:RGD Symbol;Acc:3249]	55.409	67.7847	164.683	7.58747	10.5169	14.5605	8.81302	3.13964	up
ko04066	HIF-1 signaling pathway	0.0563776	ENSRNOG00000007468	Ifng	K04687	NA	interferon gamma [Source:RGD Symbol;Acc:2866]	0	0	0	0.111509	0.315579	0.259981	0.000436637	-11.1613	down
ko04066	HIF-1 signaling pathway	0.0563776	ENSRNOG00000008587	Tek	K05121	EC:2.7.10.1	TEK receptor tyrosine kinase [Source:RGD Symbol;Acc:620980]	65.5676	80.6655	55.963	143.626	152.459	196.801	0.410229	-1.2855	down
ko04066	HIF-1 signaling pathway	0.0563776	ENSRNOG00000010208	Timp1	K16451	NA	TIMP metallopeptidase inhibitor 1 [Source:RGD Symbol;Acc:621675]	191.725	124.836	377.443	39.0496	29.0957	32.338	6.90666	2.78799	up
ko04066	HIF-1 signaling pathway	0.0563776	ENSRNOG00000010278	Il6	K05405	NA	interleukin 6 [Source:RGD Symbol;Acc:2901]	3.16485	2.11915	11.0231	0.116354	0.115796	0.224046	35.7458	5.1597	up
ko04066	HIF-1 signaling pathway	0.0563776	ENSRNOG00000013141	Eno2	K01689	EC:4.2.1.11	gamma-enolase-like [Source:RGD Symbol;Acc:6491529]	2.55255	2.89558	2.26483	1.11867	0.817755	0.804133	2.81437	1.49281	up
ko04066	HIF-1 signaling pathway	0.0563776	ENSRNOG00000014117	Hmox1	K00510	EC:1.14.14.18	heme oxygenase 1 [Source:RGD Symbol;Acc:2806]	551.077	151.281	396.168	28.4904	25.1169	27.1124	13.6091	3.7665	up
ko04066	HIF-1 signaling pathway	0.0563776	ENSRNOG00000016696	Angpt2	K05466	NA	angiopoietin 2 [Source:RGD Symbol;Acc:621861]	8.59042	8.08431	6.18316	3.01199	2.77709	3.05503	2.58453	1.3699	up
ko04066	HIF-1 signaling pathway	0.0563776	ENSRNOG00000018712	Camk2a	K04515	EC:2.7.11.17	calcium/calmodulin-dependent protein kinase II alpha [Source:RGD Symbol;Acc:2261]	0.637376	1.01802	0.591485	1.83401	1.77662	1.39807	0.448596	-1.15651	down
ko04066	HIF-1 signaling pathway	0.0563776	ENSRNOG00000048365	LOC100911625	K01689	EC:4.2.1.11	enolase 2 [Source:RGD Symbol;Acc:2554]	2.21087	1.87376	2.13235	0.93404	0.804823	1.26914	2.06681	1.04741	up
ko04066	HIF-1 signaling pathway	0.0563776	ENSRNOG00000051964	LOC108348190	K04357	NA	uncharacterized LOC108348190 [Source:RGD Symbol;Acc:11520363]	0.212498	0.315292	0.147029	0.358931	0.514377	0.568232	0.468124	-1.09504	down
ko04066	HIF-1 signaling pathway	0.0563776	ENSRNOG00000051986	Plcg2	NA	NA	phospholipase C, gamma 2 [Source:RGD Symbol;Acc:3348]	5.19104	6.76231	4.63746	12.3585	15.9316	15.9714	0.374836	-1.41567	down
ko04066	HIF-1 signaling pathway	0.0563776	ENSRNOG00000054371	Prkcg	K19663	EC:2.7.11.13	protein kinase C, gamma [Source:RGD Symbol;Acc:3397]	1.53377	1.93347	1.8286	3.48216	4.70262	3.15826	0.46688	-1.09888	down
ko04022	cGMP-PKG signaling pathway	0.0564107	ENSRNOG00000000413	Pln	K05852	NA	phospholamban [Source:RGD Symbol;Acc:619894]	2.50693	3.8037	2.06136	1.0686	1.05846	0.925892	2.74226	1.45537	up
ko04022	cGMP-PKG signaling pathway	0.0564107	ENSRNOG00000001389	Irs3	K17445	NA	insulin receptor substrate 3 [Source:RGD Symbol;Acc:69317]	2.43177	2.38892	1.71038	5.37503	4.18174	3.98315	0.482357	-1.05183	down
ko04022	cGMP-PKG signaling pathway	0.0564107	ENSRNOG00000001492	Slc8a2	K05849	NA	solute carrier family 8 member A2 [Source:RGD Symbol;Acc:620194]	0.233813	0.256782	0.262259	0.0343693	0.0610045	0.134155	3.28	1.7137	up
ko04022	cGMP-PKG signaling pathway	0.0564107	ENSRNOG00000002361	Prkg2	K19477	EC:2.7.11.12	protein kinase cGMP-dependent 2 [Source:RGD Symbol;Acc:3401]	0.031366	0.079933	0.107604	0	0	0.017976	12.1775	3.60615	up
ko04022	cGMP-PKG signaling pathway	0.0564107	ENSRNOG00000003442	Adora1	NA	NA	adenosine A1 receptor [Source:RGD Symbol;Acc:2048]	2.22958	2.85704	1.93044	0.530347	0.128806	0.423696	6.48019	2.69604	up
ko04022	cGMP-PKG signaling pathway	0.0564107	ENSRNOG00000007290	Atp1a2	K01539	EC:7.2.2.13	ATPase Na+/K+ transporting subunit alpha 2 [Source:RGD Symbol;Acc:2168]	1.11361	2.2107	0.439613	6.71531	7.20043	7.69308	0.174185	-2.52131	down
ko04022	cGMP-PKG signaling pathway	0.0564107	ENSRNOG00000009440	Gucy1b2	K12319	EC:4.6.1.2	guanylate cyclase 1 soluble subunit beta 2 [Source:RGD Symbol;Acc:2770]	0.0654379	0.0684079	0.0307582	0	0	0	548.68	9.09982	up
ko04022	cGMP-PKG signaling pathway	0.0564107	ENSRNOG00000009522	Adra1a	NA	NA	adrenoceptor alpha 1A [Source:RGD Symbol;Acc:2055]	0.443506	0.522418	0.301567	0.884054	1.07486	0.934857	0.438007	-1.19097	down
ko04022	cGMP-PKG signaling pathway	0.0564107	ENSRNOG00000010094	Kcnmb2	K04938	NA	potassium calcium-activated channel subfamily M regulatory beta subunit 2 [Source:RGD Symbol;Acc:631398]	1.40528	2.08716	1.42193	5.02584	6.16009	4.12691	0.320931	-1.63967	down
ko04022	cGMP-PKG signaling pathway	0.0564107	ENSRNOG00000012674	Adrb3	K04143	NA	adrenoceptor beta 3 [Source:RGD Symbol;Acc:2061]	0.121313	0.023431	0.203623	0	0	0	1161.22	10.1814	up
ko04022	cGMP-PKG signaling pathway	0.0564107	ENSRNOG00000015603	Prkce	NA	NA	protein kinase C, epsilon [Source:RGD Symbol;Acc:61925]	7.93806	8.81436	6.50926	11.1812	15.7408	20.6574	0.488903	-1.03238	down
ko04022	cGMP-PKG signaling pathway	0.0564107	ENSRNOG00000015788	Adora3	K04268	NA	adenosine receptor A3-like [Source:RGD Symbol;Acc:6491091]	0.981793	0.693858	1.55777	0.343286	0.434004	0.264949	3.10238	1.63338	up
ko04022	cGMP-PKG signaling pathway	0.0564107	ENSRNOG00000016983	Myh7	K17751	NA	myosin heavy chain 7 [Source:RGD Symbol;Acc:62030]	0	0.002143	0	0.338331	0.00473	0.074469	0.00513257	-7.6061	down
ko04022	cGMP-PKG signaling pathway	0.0564107	ENSRNOG00000017912	Atp2a3	K05853	EC:7.2.2.10	ATPase sarcoplasmic/endoplasmic reticulum Ca2+ transporting 3 [Source:RGD Symbol;Acc:2175]	12.551	16.9266	8.49169	31.6859	39.3186	38.9107	0.345441	-1.53349	down
ko04022	cGMP-PKG signaling pathway	0.0564107	ENSRNOG00000019560	Pde2a	K18283	EC:3.1.4.17	phosphodiesterase 2A [Source:RGD Symbol;Acc:620965]	4.49349	5.63086	3.16365	7.51152	9.28259	10.7771	0.481952	-1.05304	down
ko04022	cGMP-PKG signaling pathway	0.0564107	ENSRNOG00000020246	Myl9	K12755	NA	myosin light chain 9 [Source:RGD Symbol;Acc:1311235]	135.556	142.75	155.595	45.8177	50.7849	52.6763	2.90665	1.53936	up
ko04022	cGMP-PKG signaling pathway	0.0564107	ENSRNOG00000030269	Atp2b2	K05850	EC:7.2.2.10	ATPase plasma membrane Ca2+ transporting 2 [Source:RGD Symbol;Acc:2176]	0.0144165	0.0177611	0.0181006	0.0829795	0.0884165	0.0269138	0.253534	-1.97975	down
ko04022	cGMP-PKG signaling pathway	0.0564107	ENSRNOG00000030387	Kng1	K03898	NA	kininogen 1 [Source:RGD Symbol;Acc:1359376]	21.2306	13.4328	16.0391	1.66566	2.34674	4.32674	6.08007	2.60409	up
ko04022	cGMP-PKG signaling pathway	0.0564107	ENSRNOG00000033119	Plcb4	K05858	EC:3.1.4.11	phospholipase C, beta 4 [Source:RGD Symbol;Acc:3345]	7.14989	7.94063	6.17429	13.1434	15.847	14.3553	0.490587	-1.02742	down
ko04022	cGMP-PKG signaling pathway	0.0564107	ENSRNOG00000050743	LOC100911796	K04268	NA	adenosine A3 receptor [Source:RGD Symbol;Acc:2051]	0.956667	0.670742	1.53251	0.339604	0.292693	0.26951	3.50399	1.809	up
ko04022	cGMP-PKG signaling pathway	0.0564107	ENSRNOG00000059479	Adcy1	K08041	EC:4.6.1.1	adenylate cyclase 1 [Source:RGD Symbol;Acc:1309318]	0.206208	0.356452	0.124273	1.28217	1.19576	1.45355	0.174726	-2.51683	down
ko05323	Rheumatoid arthritis	0.060363	ENSRNOG00000002418	Tgfb2	K13376	NA	transforming growth factor, beta 2 [Source:RGD Symbol;Acc:70491]	32.2616	34.4352	34.8496	12.3645	10.9716	12.4504	2.83756	1.50465	up
ko05323	Rheumatoid arthritis	0.060363	ENSRNOG00000007159	Ccl2	K14624	NA	C-C motif chemokine ligand 2 [Source:RGD Symbol;Acc:3645]	37.7066	18.9936	41.8423	1.20024	1.4775	2.90705	17.6448	4.14117	up
ko05323	Rheumatoid arthritis	0.060363	ENSRNOG00000007468	Ifng	K04687	NA	interferon gamma [Source:RGD Symbol;Acc:2866]	0	0	0	0.111509	0.315579	0.259981	0.000436637	-11.1613	down
ko05323	Rheumatoid arthritis	0.060363	ENSRNOG00000008587	Tek	K05121	EC:2.7.10.1	TEK receptor tyrosine kinase [Source:RGD Symbol;Acc:620980]	65.5676	80.6655	55.963	143.626	152.459	196.801	0.410229	-1.2855	down
ko05323	Rheumatoid arthritis	0.060363	ENSRNOG00000009867	Tgfb3	K13377	NA	transforming growth factor, beta 3 [Source:RGD Symbol;Acc:3851]	28.04	20.6768	22.6266	8.0599	7.08636	6.45932	3.30208	1.72338	up
ko05323	Rheumatoid arthritis	0.060363	ENSRNOG00000010278	Il6	K05405	NA	interleukin 6 [Source:RGD Symbol;Acc:2901]	3.16485	2.11915	11.0231	0.116354	0.115796	0.224046	35.7458	5.1597	up
ko05323	Rheumatoid arthritis	0.060363	ENSRNOG00000010906	Ccl5	K12499	NA	C-C motif chemokine ligand 5 [Source:RGD Symbol;Acc:69069]	33.6073	45.533	17.0812	161.621	269.977	147.801	0.166071	-2.59013	down
ko05323	Rheumatoid arthritis	0.060363	ENSRNOG00000015615	Tnfrsf11a	K05147	NA	TNF receptor superfamily member 11A [Source:RGD Symbol;Acc:1563614]	11.8889	9.01333	10.4355	4.72597	5.05818	3.3997	2.37698	1.24913	up
ko05323	Rheumatoid arthritis	0.060363	ENSRNOG00000015992	Ccl20	NA	NA	C-C motif chemokine ligand 20 [Source:RGD Symbol;Acc:3646]	3.55187	1.52624	2.52854	0.934769	1.07933	0.51172	3.01156	1.59051	up
ko05323	Rheumatoid arthritis	0.060363	ENSRNOG00000021155	Ctsk	NA	NA	cathepsin K [Source:RGD Symbol;Acc:61810]	41.0334	42.676	29.5982	11.0648	7.58504	6.87196	4.43964	2.15044	up
ko05323	Rheumatoid arthritis	0.060363	ENSRNOG00000029768	Ccl12	K14624	NA	chemokine (C-C motif) ligand 12 [Source:RGD Symbol;Acc:1309255]	6.0007	2.47451	2.57848	0	0.075135	0.603588	16.286	4.02556	up
ko05323	Rheumatoid arthritis	0.060363	ENSRNOG00000047864	LOC108348072	K06752	NA	RT1 class II, locus DMa [Source:RGD Symbol;Acc:735053]	18.1206	19.1445	16.0483	10.0005	6.31184	7.37897	2.25034	1.17014	up
ko04670	Leukocyte transendothelial migration	0.0638643	ENSRNOG00000001476	Cldn4	K06087	NA	claudin 4 [Source:RGD Symbol;Acc:1307932]	13.9115	12.0102	14.9617	3.95699	3.62557	4.40384	3.41082	1.77012	up
ko04670	Leukocyte transendothelial migration	0.0638643	ENSRNOG00000001926	Cldn1	K06087	NA	claudin 1 [Source:RGD Symbol;Acc:68422]	0.854451	0.532531	0.439747	1.26286	1.16606	2.36597	0.380974	-1.39223	down
ko04670	Leukocyte transendothelial migration	0.0638643	ENSRNOG00000003648	Cldn6	K06087	NA	claudin 6 [Source:RGD Symbol;Acc:1308837]	5.55802	3.20902	3.03748	0.538814	0.51741	0.201333	9.38687	3.23064	up
ko04670	Leukocyte transendothelial migration	0.0638643	ENSRNOG00000006604	Thy1	K06514	NA	Thy-1 cell surface antigen [Source:RGD Symbol;Acc:3860]	15.8972	8.453	8.31882	2.09459	3.60439	3.61669	3.50689	1.81019	up
ko04670	Leukocyte transendothelial migration	0.0638643	ENSRNOG00000006860	Itk	K07363	EC:2.7.10.2	IL2-inducible T-cell kinase [Source:RGD Symbol;Acc:1311618]	1.21946	1.15847	0.610766	1.65818	2.51448	2.0297	0.481865	-1.0533	down
ko04670	Leukocyte transendothelial migration	0.0638643	ENSRNOG00000010263	Cldn11	K06087	NA	claudin 11 [Source:RGD Symbol;Acc:71081]	9.74336	8.428	8.69926	2.68847	2.864	2.8561	3.19562	1.6761	up
ko04670	Leukocyte transendothelial migration	0.0638643	ENSRNOG00000014409	Myl7	K12754	NA	myosin light chain 7 [Source:RGD Symbol;Acc:1308262]	0.119219	0.0167495	0.0100427	5.72545	0.117447	1.76474	0.0191928	-5.70329	down
ko04670	Leukocyte transendothelial migration	0.0638643	ENSRNOG00000016695	Mmp2	K01398	EC:3.4.24.24	matrix metallopeptidase 2 [Source:RGD Symbol;Acc:621316]	112.629	84.3299	76.9475	30.7938	26.2646	32.2348	3.06749	1.61706	up
ko04670	Leukocyte transendothelial migration	0.0638643	ENSRNOG00000017539	Mmp9	K01403	EC:3.4.24.35	matrix metallopeptidase 9 [Source:RGD Symbol;Acc:621320]	0.708985	0.326444	0.167858	0.688657	1.06294	1.59762	0.359274	-1.47684	down
ko04670	Leukocyte transendothelial migration	0.0638643	ENSRNOG00000017645	Mylpf	K12758	NA	myosin light chain, phosphorylatable, fast skeletal muscle [Source:RGD Symbol;Acc:3141]	2.23646	2.79222	1.58914	5.37923	8.99875	4.30547	0.354207	-1.49733	down
ko04670	Leukocyte transendothelial migration	0.0638643	ENSRNOG00000020246	Myl9	K12755	NA	myosin light chain 9 [Source:RGD Symbol;Acc:1311235]	135.556	142.75	155.595	45.8177	50.7849	52.6763	2.90665	1.53936	up
ko04670	Leukocyte transendothelial migration	0.0638643	ENSRNOG00000025925	Txk	K08016	EC:2.7.10.2	TXK tyrosine kinase [Source:RGD Symbol;Acc:1306481]	1.46439	1.89149	0.898113	4.38982	8.35989	4.62185	0.244883	-2.02984	down
ko04670	Leukocyte transendothelial migration	0.0638643	ENSRNOG00000051986	Plcg2	NA	NA	phospholipase C, gamma 2 [Source:RGD Symbol;Acc:3348]	5.19104	6.76231	4.63746	12.3585	15.9316	15.9714	0.374836	-1.41567	down
ko04670	Leukocyte transendothelial migration	0.0638643	ENSRNOG00000054371	Prkcg	K19663	EC:2.7.11.13	protein kinase C, gamma [Source:RGD Symbol;Acc:3397]	1.53377	1.93347	1.8286	3.48216	4.70262	3.15826	0.46688	-1.09888	down
ko04670	Leukocyte transendothelial migration	0.0638643	ENSRNOG00000056756	Actn1	K05699	NA	actinin, alpha 1 [Source:RGD Symbol;Acc:70907]	53.4333	54.3079	64.5786	24.6416	28.3915	29.6839	2.08324	1.05883	up
ko00650	Butanoate metabolism	0.0644089	ENSRNOG00000002636	Abat	K13524	2.6.1.22;EC:2.6.1.19	4-aminobutyrate aminotransferase [Source:RGD Symbol;Acc:620948]	0.050641	0.092212	0.036326	0.388185	0.10771	0.25824	0.237595	-2.07342	down
ko00650	Butanoate metabolism	0.0644089	ENSRNOG00000016552	Hmgcs1	NA	NA	3-hydroxy-3-methylglutaryl-CoA synthase 1 [Source:RGD Symbol;Acc:70970]	34.5157	42.0386	47.789	17.4676	15.7994	17.4432	2.45203	1.29398	up
ko00650	Butanoate metabolism	0.0644089	ENSRNOG00000019120	Hmgcs2	K01641	EC:2.3.3.10	3-hydroxy-3-methylglutaryl-CoA synthase 2 [Source:RGD Symbol;Acc:2804]	5.71888	6.61347	2.53401	15.7508	13.4292	15.6114	0.331902	-1.59117	down
ko00650	Butanoate metabolism	0.0644089	ENSRNOG00000019189	Acat2	K00626	EC:2.3.1.9	acetyl-CoA acetyltransferase 2 [Source:RGD Symbol;Acc:1359366]	7.37918	6.24791	9.42248	2.62881	2.58117	2.8686	2.85317	1.51257	up
ko00650	Butanoate metabolism	0.0644089	ENSRNOG00000031211	Acsm5	K01896	EC:6.2.1.2	acyl-CoA synthetase medium-chain family member 5 [Source:RGD Symbol;Acc:1309578]	3.13042	3.97634	2.48557	8.32427	8.13527	5.43372	0.438141	-1.19053	down
ko04062	Chemokine signaling pathway	0.0672404	ENSRNOG00000000239	Ccl7	K05509	NA	C-C motif chemokine ligand 7 [Source:RGD Symbol;Acc:1359152]	14.4232	11.1589	18.1968	0.946133	0.831492	2.17106	11.087	3.47079	up
ko04062	Chemokine signaling pathway	0.0672404	ENSRNOG00000006311	Ccr9	K04184	NA	C-C motif chemokine receptor 9 [Source:RGD Symbol;Acc:628750]	0.257415	0.243861	0.157072	0.830937	1.15195	0.453854	0.270175	-1.88803	down
ko04062	Chemokine signaling pathway	0.0672404	ENSRNOG00000006620	Xcr1	K04193	NA	X-C motif chemokine receptor 1 [Source:RGD Symbol;Acc:1311480]	1.18516	1.08826	0.853155	0.531912	0.487721	0.484413	2.07878	1.05573	up
ko04062	Chemokine signaling pathway	0.0672404	ENSRNOG00000006736	Ccr3	K04178	NA	C-C motif chemokine receptor 3 [Source:RGD Symbol;Acc:620593]	0.551225	0.302268	0.337885	1.23779	0.699775	0.888156	0.421619	-1.24599	down
ko04062	Chemokine signaling pathway	0.0672404	ENSRNOG00000006860	Itk	K07363	EC:2.7.10.2	IL2-inducible T-cell kinase [Source:RGD Symbol;Acc:1311618]	1.21946	1.15847	0.610766	1.65818	2.51448	2.0297	0.481865	-1.0533	down
ko04062	Chemokine signaling pathway	0.0672404	ENSRNOG00000007159	Ccl2	K14624	NA	C-C motif chemokine ligand 2 [Source:RGD Symbol;Acc:3645]	37.7066	18.9936	41.8423	1.20024	1.4775	2.90705	17.6448	4.14117	up
ko04062	Chemokine signaling pathway	0.0672404	ENSRNOG00000007335	Ccl11	NA	NA	C-C motif chemokine ligand 11 [Source:RGD Symbol;Acc:3644]	3.34409	1.3286	2.39904	6.15745	3.9376	18.2383	0.249591	-2.00236	down
ko04062	Chemokine signaling pathway	0.0672404	ENSRNOG00000008030	Shc2	K17447	NA	SHC adaptor protein 2 [Source:RGD Symbol;Acc:1307137]	1.08558	1.2228	0.495709	1.31078	2.86654	1.98796	0.45482	-1.13663	down
ko04062	Chemokine signaling pathway	0.0672404	ENSRNOG00000010906	Ccl5	K12499	NA	C-C motif chemokine ligand 5 [Source:RGD Symbol;Acc:69069]	33.6073	45.533	17.0812	161.621	269.977	147.801	0.166071	-2.59013	down
ko04062	Chemokine signaling pathway	0.0672404	ENSRNOG00000014269	Cxcr2	NA	NA	C-X-C motif chemokine receptor 2 [Source:RGD Symbol;Acc:2906]	2.28515	1.28783	1.53123	4.02702	2.16233	5.47115	0.437735	-1.19187	down
ko04062	Chemokine signaling pathway	0.0672404	ENSRNOG00000015992	Ccl20	NA	NA	C-C motif chemokine ligand 20 [Source:RGD Symbol;Acc:3646]	3.55187	1.52624	2.52854	0.934769	1.07933	0.51172	3.01156	1.59051	up
ko04062	Chemokine signaling pathway	0.0672404	ENSRNOG00000016278	Ccl17	K21083	NA	C-C motif chemokine ligand 17 [Source:RGD Symbol;Acc:619924]	3.89019	6.53501	5.24364	1.31455	3.29401	1.16464	2.71406	1.44045	up
ko04062	Chemokine signaling pathway	0.0672404	ENSRNOG00000016535	Ccl22	K21095	NA	C-C motif chemokine ligand 22 [Source:RGD Symbol;Acc:619933]	0.579045	2.03706	1.27757	0.082517	0.590059	0.297163	4.01517	2.00546	up
ko04062	Chemokine signaling pathway	0.0672404	ENSRNOG00000021098	Rasgrp2	K12361	NA	RAS guanyl releasing protein 2 [Source:RGD Symbol;Acc:1311630]	8.21941	9.41176	4.73127	17.3456	22.6314	17.6577	0.388003	-1.36586	down
ko04062	Chemokine signaling pathway	0.0672404	ENSRNOG00000021569	Tiam1	K05731	NA	T-cell lymphoma invasion and metastasis 1 [Source:RGD Symbol;Acc:1307455]	2.12158	2.24547	1.49218	0.584266	1.21954	1.06253	2.04415	1.0315	up
ko04062	Chemokine signaling pathway	0.0672404	ENSRNOG00000021851	Ccl1	K05514	NA	C-C motif chemokine ligand 1 [Source:RGD Symbol;Acc:1586495]	1.29096	0.891293	0.828182	0.159979	0	0	18.8177	4.23402	up
ko04062	Chemokine signaling pathway	0.0672404	ENSRNOG00000022298	Cxcl11	K12672	NA	C-X-C motif chemokine ligand 11 [Source:RGD Symbol;Acc:727827]	0.612395	0.600572	0.531235	0.05833	0.123484	0.076764	6.74536	2.7539	up
ko04062	Chemokine signaling pathway	0.0672404	ENSRNOG00000029768	Ccl12	K14624	NA	chemokine (C-C motif) ligand 12 [Source:RGD Symbol;Acc:1309255]	6.0007	2.47451	2.57848	0	0.075135	0.603588	16.286	4.02556	up
ko04062	Chemokine signaling pathway	0.0672404	ENSRNOG00000031162	Ccl24	K21097	NA	C-C motif chemokine ligand 24 [Source:RGD Symbol;Acc:1310245]	5.13001	4.48235	6.31795	1.67853	1.29167	1.65069	3.44746	1.78553	up
ko04062	Chemokine signaling pathway	0.0672404	ENSRNOG00000033119	Plcb4	K05858	EC:3.1.4.11	phospholipase C, beta 4 [Source:RGD Symbol;Acc:3345]	7.14989	7.94063	6.17429	13.1434	15.847	14.3553	0.490587	-1.02742	down
ko04062	Chemokine signaling pathway	0.0672404	ENSRNOG00000034290	Ccl21	K16062	NA	C-C motif chemokine ligand 21 [Source:RGD Symbol;Acc:1311996]	171.913	158.057	123.877	70.7503	53.7025	41.4424	2.73575	1.45194	up
ko04062	Chemokine signaling pathway	0.0672404	ENSRNOG00000059479	Adcy1	K08041	EC:4.6.1.1	adenylate cyclase 1 [Source:RGD Symbol;Acc:1309318]	0.206208	0.356452	0.124273	1.28217	1.19576	1.45355	0.174726	-2.51683	down
ko04260	Cardiac muscle contraction	0.0697471	ENSRNOG00000003245	Cacng1	NA	NA	calcium voltage-gated channel auxiliary subunit gamma 1 [Source:RGD Symbol;Acc:2249]	0.342541	0.070667	0.216756	0.041472	0	0	15.1901	3.92506	up
ko04260	Cardiac muscle contraction	0.0697471	ENSRNOG00000007290	Atp1a2	K01539	EC:7.2.2.13	ATPase Na+/K+ transporting subunit alpha 2 [Source:RGD Symbol;Acc:2168]	1.11361	2.2107	0.439613	6.71531	7.20043	7.69308	0.174185	-2.52131	down
ko04260	Cardiac muscle contraction	0.0697471	ENSRNOG00000007666	Cacnb4	K04865	NA	calcium voltage-gated channel auxiliary subunit beta 4 [Source:RGD Symbol;Acc:68385]	0.231166	0.227915	0.115713	0.714819	1.19904	0.551053	0.23319	-2.10042	down
ko04260	Cardiac muscle contraction	0.0697471	ENSRNOG00000008536	Actc1	NA	NA	actin, alpha, cardiac muscle 1 [Source:RGD Symbol;Acc:2026]	37.3836	38.0183	33.7249	14.0479	7.50795	11.0879	3.34296	1.74112	up
ko04260	Cardiac muscle contraction	0.0697471	ENSRNOG00000014656	Cox8b	K02273	NA	cytochrome c oxidase, subunit VIIIb [Source:RGD Symbol;Acc:2386]	0.277625	0.746188	0	2.00303	2.96552	3.64464	0.118866	-3.07259	down
ko04260	Cardiac muscle contraction	0.0697471	ENSRNOG00000016731	Tpm2	K10374	NA	tropomyosin 2 [Source:RGD Symbol;Acc:1559479]	130.596	119.409	127.205	32.1348	33.0202	37.6343	3.66974	1.87568	up
ko04260	Cardiac muscle contraction	0.0697471	ENSRNOG00000016983	Myh7	K17751	NA	myosin heavy chain 7 [Source:RGD Symbol;Acc:62030]	0	0.002143	0	0.338331	0.00473	0.074469	0.00513257	-7.6061	down
ko04260	Cardiac muscle contraction	0.0697471	ENSRNOG00000025757	Myh6	NA	NA	myosin heavy chain 6 [Source:RGD Symbol;Acc:62029]	0	0.014741	0.007949	5.02898	0.023107	2.7062	0.00292461	-8.41754	down
ko04260	Cardiac muscle contraction	0.0697471	ENSRNOG00000050015	Cox7a1	K02270	NA	similar to Cytochrome c oxidase polypeptide VIIa-heart, mitochondrial precursor (Cytochrome c oxidase subunit VIIa-H) (COX VIIa-M) [Source:RGD Symbol;Acc:1584257]	1.6792	1.48093	1.55606	6.97963	5.21277	3.44794	0.30154	-1.72958	down
ko04260	Cardiac muscle contraction	0.0697471	ENSRNOG00000050675	Myl4	K12750	NA	myosin, light chain 4 [Source:RGD Symbol;Acc:1591197]	0.719864	0.702105	0.524042	7.65628	0.763299	3.20716	0.167374	-2.57885	down
ko04260	Cardiac muscle contraction	0.0697471	ENSRNOG00000054274	Cacnb3	NA	NA	calcium voltage-gated channel auxiliary subunit beta 3 [Source:RGD Symbol;Acc:2248]	12.6099	10.2322	7.67604	5.49561	3.55387	4.34237	2.27886	1.18831	up
ko04261	Adrenergic signaling in cardiomyocytes	0.07164	ENSRNOG00000000413	Pln	K05852	NA	phospholamban [Source:RGD Symbol;Acc:619894]	2.50693	3.8037	2.06136	1.0686	1.05846	0.925892	2.74226	1.45537	up
ko04261	Adrenergic signaling in cardiomyocytes	0.07164	ENSRNOG00000003245	Cacng1	NA	NA	calcium voltage-gated channel auxiliary subunit gamma 1 [Source:RGD Symbol;Acc:2249]	0.342541	0.070667	0.216756	0.041472	0	0	15.1901	3.92506	up
ko04261	Adrenergic signaling in cardiomyocytes	0.07164	ENSRNOG00000007290	Atp1a2	K01539	EC:7.2.2.13	ATPase Na+/K+ transporting subunit alpha 2 [Source:RGD Symbol;Acc:2168]	1.11361	2.2107	0.439613	6.71531	7.20043	7.69308	0.174185	-2.52131	down
ko04261	Adrenergic signaling in cardiomyocytes	0.07164	ENSRNOG00000007666	Cacnb4	K04865	NA	calcium voltage-gated channel auxiliary subunit beta 4 [Source:RGD Symbol;Acc:68385]	0.231166	0.227915	0.115713	0.714819	1.19904	0.551053	0.23319	-2.10042	down
ko04261	Adrenergic signaling in cardiomyocytes	0.07164	ENSRNOG00000008536	Actc1	NA	NA	actin, alpha, cardiac muscle 1 [Source:RGD Symbol;Acc:2026]	37.3836	38.0183	33.7249	14.0479	7.50795	11.0879	3.34296	1.74112	up
ko04261	Adrenergic signaling in cardiomyocytes	0.07164	ENSRNOG00000009522	Adra1a	NA	NA	adrenoceptor alpha 1A [Source:RGD Symbol;Acc:2055]	0.443506	0.522418	0.301567	0.884054	1.07486	0.934857	0.438007	-1.19097	down
ko04261	Adrenergic signaling in cardiomyocytes	0.07164	ENSRNOG00000016731	Tpm2	K10374	NA	tropomyosin 2 [Source:RGD Symbol;Acc:1559479]	130.596	119.409	127.205	32.1348	33.0202	37.6343	3.66974	1.87568	up
ko04261	Adrenergic signaling in cardiomyocytes	0.07164	ENSRNOG00000016983	Myh7	K17751	NA	myosin heavy chain 7 [Source:RGD Symbol;Acc:62030]	0	0.002143	0	0.338331	0.00473	0.074469	0.00513257	-7.6061	down
ko04261	Adrenergic signaling in cardiomyocytes	0.07164	ENSRNOG00000018712	Camk2a	K04515	EC:2.7.11.17	calcium/calmodulin-dependent protein kinase II alpha [Source:RGD Symbol;Acc:2261]	0.637376	1.01802	0.591485	1.83401	1.77662	1.39807	0.448596	-1.15651	down
ko04261	Adrenergic signaling in cardiomyocytes	0.07164	ENSRNOG00000018851	Ppp2r2b	K04354	NA	protein phosphatase 2, regulatory subunit B, beta [Source:RGD Symbol;Acc:631441]	3.16847	2.77345	3.60839	1.62792	1.1151	0.816664	2.68291	1.4238	up
ko04261	Adrenergic signaling in cardiomyocytes	0.07164	ENSRNOG00000021102	Scn1b	NA	NA	sodium voltage-gated channel beta subunit 1 [Source:RGD Symbol;Acc:3631]	4.98085	3.89237	4.76378	1.72275	2.14045	1.48102	2.55173	1.35147	up
ko04261	Adrenergic signaling in cardiomyocytes	0.07164	ENSRNOG00000025757	Myh6	NA	NA	myosin heavy chain 6 [Source:RGD Symbol;Acc:62029]	0	0.014741	0.007949	5.02898	0.023107	2.7062	0.00292461	-8.41754	down
ko04261	Adrenergic signaling in cardiomyocytes	0.07164	ENSRNOG00000029342	Scn7a	K04839	NA	sodium voltage-gated channel alpha subunit 7 [Source:RGD Symbol;Acc:61922]	34.779	50.2463	29.3145	11.5574	9.24312	13.5523	3.32839	1.73483	up
ko04261	Adrenergic signaling in cardiomyocytes	0.07164	ENSRNOG00000030269	Atp2b2	K05850	EC:7.2.2.10	ATPase plasma membrane Ca2+ transporting 2 [Source:RGD Symbol;Acc:2176]	0.0144165	0.0177611	0.0181006	0.0829795	0.0884165	0.0269138	0.253534	-1.97975	down
ko04261	Adrenergic signaling in cardiomyocytes	0.07164	ENSRNOG00000033119	Plcb4	K05858	EC:3.1.4.11	phospholipase C, beta 4 [Source:RGD Symbol;Acc:3345]	7.14989	7.94063	6.17429	13.1434	15.847	14.3553	0.490587	-1.02742	down
ko04261	Adrenergic signaling in cardiomyocytes	0.07164	ENSRNOG00000050675	Myl4	K12750	NA	myosin, light chain 4 [Source:RGD Symbol;Acc:1591197]	0.719864	0.702105	0.524042	7.65628	0.763299	3.20716	0.167374	-2.57885	down
ko04261	Adrenergic signaling in cardiomyocytes	0.07164	ENSRNOG00000054274	Cacnb3	NA	NA	calcium voltage-gated channel auxiliary subunit beta 3 [Source:RGD Symbol;Acc:2248]	12.6099	10.2322	7.67604	5.49561	3.55387	4.34237	2.27886	1.18831	up
ko04261	Adrenergic signaling in cardiomyocytes	0.07164	ENSRNOG00000059479	Adcy1	K08041	EC:4.6.1.1	adenylate cyclase 1 [Source:RGD Symbol;Acc:1309318]	0.206208	0.356452	0.124273	1.28217	1.19576	1.45355	0.174726	-2.51683	down
ko00830	Retinol metabolism	0.0732044	ENSRNOG00000009597	Cyp4a1	K07425	EC:1.14.14.80	cytochrome P450, family 4, subfamily a, polypeptide 1 [Source:RGD Symbol;Acc:68945]	0.15917	0.263654	0.0812323	0.543618	0.850142	0.365403	0.286531	-1.80323	down
ko00830	Retinol metabolism	0.0732044	ENSRNOG00000015076	Cyp26b1	K12664	NA	cytochrome P450, family 26, subfamily b, polypeptide 1 [Source:RGD Symbol;Acc:631379]	1.58593	4.05498	1.79919	5.41083	6.21138	5.81279	0.426733	-1.22859	down
ko00830	Retinol metabolism	0.0732044	ENSRNOG00000015354	Aox1	K00157	EC:1.2.3.1	aldehyde oxidase 1 [Source:RGD Symbol;Acc:620528]	3.60537	5.38913	2.23097	11.3222	11.3536	11.3529	0.329883	-1.59998	down
ko00830	Retinol metabolism	0.0732044	ENSRNOG00000017619	Aldh1a1	K07249	EC:1.2.1.36	aldehyde dehydrogenase 1 family, member A1 [Source:RGD Symbol;Acc:2087]	49.2632	48.7098	82.124	108.696	153.724	185.488	0.402085	-1.31443	down
ko00830	Retinol metabolism	0.0732044	ENSRNOG00000020817	Cyp2a1	K07411	EC:1.14.14.1	cytochrome P450, family 2, subfamily a, polypeptide 1 [Source:RGD Symbol;Acc:2463]	0.757498	1.85236	0.153464	4.01074	10.1188	5.85792	0.138253	-2.85462	down
ko00830	Retinol metabolism	0.0732044	ENSRNOG00000029651	LOC100365958	K11154	EC:1.1.1.-	retinol dehydrogenase 16 [Source:RGD Symbol;Acc:735050]	1.18367	0.583971	0.836963	2.33885	2.37969	2.79162	0.346811	-1.52778	down
ko00830	Retinol metabolism	0.0732044	ENSRNOG00000032959	Adh7	K13951	EC:1.1.1.1	alcohol dehydrogenase 7 (class IV), mu or sigma polypeptide [Source:RGD Symbol;Acc:621638]	2.43511	3.44985	1.51791	5.94367	5.77427	4.45965	0.457601	-1.12784	down
ko00830	Retinol metabolism	0.0732044	ENSRNOG00000046643	Cyp3a9	K07424	EC:1.14.14.1	cytochrome P450, family 3, subfamily a, polypeptide 9 [Source:RGD Symbol;Acc:708392]	1.53291	1.42943	1.53715	3.08589	4.81783	3.05246	0.41068	-1.28391	down
ko00830	Retinol metabolism	0.0732044	ENSRNOG00000062125	Aox3	K00157	EC:1.2.3.1	aldehyde oxidase 3 [Source:RGD Symbol;Acc:1359328]	0.87407	1.02473	0.56828	2.35684	2.41775	3.05158	0.315235	-1.6655	down
ko05321	Inflammatory bowel disease (IBD)	0.0732044	ENSRNOG00000002418	Tgfb2	K13376	NA	transforming growth factor, beta 2 [Source:RGD Symbol;Acc:70491]	32.2616	34.4352	34.8496	12.3645	10.9716	12.4504	2.83756	1.50465	up
ko05321	Inflammatory bowel disease (IBD)	0.0732044	ENSRNOG00000007270	Il12rb2	K05064	NA	interleukin 12 receptor subunit beta 2 [Source:RGD Symbol;Acc:620026]	0.854936	0.779215	0.717746	1.59409	2.39643	2.03746	0.390164	-1.35785	down
ko05321	Inflammatory bowel disease (IBD)	0.0732044	ENSRNOG00000007468	Ifng	K04687	NA	interferon gamma [Source:RGD Symbol;Acc:2866]	0	0	0	0.111509	0.315579	0.259981	0.000436637	-11.1613	down
ko05321	Inflammatory bowel disease (IBD)	0.0732044	ENSRNOG00000009427	Tbx21	K10166	NA	T-box 21 [Source:RGD Symbol;Acc:1308264]	2.73093	3.08446	0.760526	5.84379	17.6681	7.66245	0.21094	-2.24509	down
ko05321	Inflammatory bowel disease (IBD)	0.0732044	ENSRNOG00000009867	Tgfb3	K13377	NA	transforming growth factor, beta 3 [Source:RGD Symbol;Acc:3851]	28.04	20.6768	22.6266	8.0599	7.08636	6.45932	3.30208	1.72338	up
ko05321	Inflammatory bowel disease (IBD)	0.0732044	ENSRNOG00000010278	Il6	K05405	NA	interleukin 6 [Source:RGD Symbol;Acc:2901]	3.16485	2.11915	11.0231	0.116354	0.115796	0.224046	35.7458	5.1597	up
ko05321	Inflammatory bowel disease (IBD)	0.0732044	ENSRNOG00000019216	Il12rb1	K05063	NA	interleukin 12 receptor subunit beta 1 [Source:RGD Symbol;Acc:620025]	0.585973	0.344356	0.316211	1.4795	2.72557	0.888842	0.244712	-2.03084	down
ko05321	Inflammatory bowel disease (IBD)	0.0732044	ENSRNOG00000047864	LOC108348072	K06752	NA	RT1 class II, locus DMa [Source:RGD Symbol;Acc:735053]	18.1206	19.1445	16.0483	10.0005	6.31184	7.37897	2.25034	1.17014	up
ko05321	Inflammatory bowel disease (IBD)	0.0732044	ENSRNOG00000054218	Il18rap	K05174	NA	interleukin 18 receptor accessory protein [Source:RGD Symbol;Acc:727867]	1.06497	1.16437	1.02399	2.2962	4.45823	2.34981	0.357343	-1.48462	down
ko00512	Mucin type O-glycan biosynthesis	0.074198	ENSRNOG00000000251	St6galnac1	K03479	EC:2.4.99.3	ST6 N-acetylgalactosaminide alpha-2,6-sialyltransferase 1 [Source:RGD Symbol;Acc:1562048]	0.404718	0.01927	0.588358	0	0	0	3374.49	11.7205	up
ko00512	Mucin type O-glycan biosynthesis	0.074198	ENSRNOG00000004589	Galnt16	K00710	EC:2.4.1.41	polypeptide N-acetylgalactosaminyltransferase 16 [Source:RGD Symbol;Acc:1310202]	1.39865	0.833933	0.976815	0.729452	0.391388	0.453318	2.0388	1.02772	up
ko00512	Mucin type O-glycan biosynthesis	0.074198	ENSRNOG00000007951	Galnt14	K00710	EC:2.4.1.41	polypeptide N-acetylgalactosaminyltransferase 14 [Source:RGD Symbol;Acc:1310068]	0.090449	0.144045	0.187898	1.22288	1.53036	1.57812	0.0975195	-3.35817	down
ko00512	Mucin type O-glycan biosynthesis	0.074198	ENSRNOG00000019718	Galnt15	K00710	EC:2.4.1.41	polypeptide N-acetylgalactosaminyltransferase 15 [Source:MGI Symbol;Acc:MGI:1926004]	2.06938	2.30788	0.814215	4.52076	3.49921	5.05571	0.397033	-1.33267	down
ko00512	Mucin type O-glycan biosynthesis	0.074198	ENSRNOG00000050534	Gcnt1	K00727	EC:2.4.1.102	glucosaminyl (N-acetyl) transferase 1 [Source:RGD Symbol;Acc:621370]	8.27604	7.85306	5.52482	3.55186	3.24177	3.63304	2.07678	1.05435	up
ko05310	Asthma	0.074198	ENSRNOG00000007335	Ccl11	NA	NA	C-C motif chemokine ligand 11 [Source:RGD Symbol;Acc:3644]	3.34409	1.3286	2.39904	6.15745	3.9376	18.2383	0.249591	-2.00236	down
ko05310	Asthma	0.074198	ENSRNOG00000008394	Prg2	K10786	NA	proteoglycan 2 [Source:RGD Symbol;Acc:69336]	0.538168	0.156482	0.30242	1.07345	1.12166	1.455	0.273162	-1.87217	down
ko05310	Asthma	0.074198	ENSRNOG00000009177	Fcer1a	K08089	NA	Fc fragment of IgE receptor Ia [Source:RGD Symbol;Acc:2597]	11.7309	2.89785	1.78742	1.47421	0.54891	1.09037	5.27258	2.39851	up
ko05310	Asthma	0.074198	ENSRNOG00000020993	Ms4a2	K08090	NA	membrane spanning 4-domains A2 [Source:RGD Symbol;Acc:2598]	7.02676	2.45204	1.76553	1.26067	0.858921	0.875766	3.75392	1.9084	up
ko05310	Asthma	0.074198	ENSRNOG00000047864	LOC108348072	K06752	NA	RT1 class II, locus DMa [Source:RGD Symbol;Acc:735053]	18.1206	19.1445	16.0483	10.0005	6.31184	7.37897	2.25034	1.17014	up
ko00350	Tyrosine metabolism	0.074945	ENSRNOG00000002331	Aldh3a1	K00129	EC:1.2.1.5	aldehyde dehydrogenase 3 family, member A1 [Source:RGD Symbol;Acc:2088]	0.906245	1.33741	0.734843	3.9607	3.15494	3.58458	0.278359	-1.84498	down
ko00350	Tyrosine metabolism	0.074945	ENSRNOG00000015354	Aox1	K00157	EC:1.2.3.1	aldehyde oxidase 1 [Source:RGD Symbol;Acc:620528]	3.60537	5.38913	2.23097	11.3222	11.3536	11.3529	0.329883	-1.59998	down
ko00350	Tyrosine metabolism	0.074945	ENSRNOG00000032959	Adh7	K13951	EC:1.1.1.1	alcohol dehydrogenase 7 (class IV), mu or sigma polypeptide [Source:RGD Symbol;Acc:621638]	2.43511	3.44985	1.51791	5.94367	5.77427	4.45965	0.457601	-1.12784	down
ko00350	Tyrosine metabolism	0.074945	ENSRNOG00000043116	RGD1308564	K03334	EC:1.4.3.2	similar to L-amino acid oxidase 1 [Source:RGD Symbol;Acc:1308564]	0.026424	0	0	0.340514	0.096658	0.17216	0.0433655	-4.52731	down
ko00350	Tyrosine metabolism	0.074945	ENSRNOG00000046057	Pnmt	K00553	EC:2.1.1.28	phenylethanolamine-N-methyltransferase [Source:RGD Symbol;Acc:3361]	0.198155	0.189812	0.081637	0.569708	0.438718	0.467681	0.318137	-1.65228	down
ko00350	Tyrosine metabolism	0.074945	ENSRNOG00000062125	Aox3	K00157	EC:1.2.3.1	aldehyde oxidase 3 [Source:RGD Symbol;Acc:1359328]	0.87407	1.02473	0.56828	2.35684	2.41775	3.05158	0.315235	-1.6655	down
ko04068	FoxO signaling pathway	0.0796598	ENSRNOG00000000521	Cdkn1a	K06625	NA	cyclin-dependent kinase inhibitor 1A [Source:RGD Symbol;Acc:69328]	60.966	98.6015	55.2437	36.6148	37.2161	27.4646	2.12064	1.0845	up
ko04068	FoxO signaling pathway	0.0796598	ENSRNOG00000001389	Irs3	K17445	NA	insulin receptor substrate 3 [Source:RGD Symbol;Acc:69317]	2.43177	2.38892	1.71038	5.37503	4.18174	3.98315	0.482357	-1.05183	down
ko04068	FoxO signaling pathway	0.0796598	ENSRNOG00000002418	Tgfb2	K13376	NA	transforming growth factor, beta 2 [Source:RGD Symbol;Acc:70491]	32.2616	34.4352	34.8496	12.3645	10.9716	12.4504	2.83756	1.50465	up
ko04068	FoxO signaling pathway	0.0796598	ENSRNOG00000002978	Faslg	K04389	NA	Fas ligand [Source:RGD Symbol;Acc:3880]	0.816894	1.01133	0.807977	3.43662	5.79528	3.71874	0.203558	-2.29649	down
ko04068	FoxO signaling pathway	0.0796598	ENSRNOG00000005370	S1pr4	K04293	NA	sphingosine-1-phosphate receptor 4 [Source:RGD Symbol;Acc:1304801]	4.28814	4.99459	2.38803	7.72174	10.0489	8.44379	0.445203	-1.16746	down
ko04068	FoxO signaling pathway	0.0796598	ENSRNOG00000009867	Tgfb3	K13377	NA	transforming growth factor, beta 3 [Source:RGD Symbol;Acc:3851]	28.04	20.6768	22.6266	8.0599	7.08636	6.45932	3.30208	1.72338	up
ko04068	FoxO signaling pathway	0.0796598	ENSRNOG00000010278	Il6	K05405	NA	interleukin 6 [Source:RGD Symbol;Acc:2901]	3.16485	2.11915	11.0231	0.116354	0.115796	0.224046	35.7458	5.1597	up
ko04068	FoxO signaling pathway	0.0796598	ENSRNOG00000011654	Plk4	K08863	EC:2.7.11.21	polo-like kinase 4 [Source:RGD Symbol;Acc:1305390]	3.88341	3.27569	3.42057	1.44747	1.29323	1.59632	2.43939	1.28652	up
ko04068	FoxO signaling pathway	0.0796598	ENSRNOG00000014290	Grm1	K04603	NA	glutamate metabotropic receptor 1 [Source:RGD Symbol;Acc:2742]	0.009912	0	0.015688	0.069331	0.104979	0.0226431	0.12998	-2.94364	down
ko04068	FoxO signaling pathway	0.0796598	ENSRNOG00000017226	Slc2a4	K07191	NA	solute carrier family 2 member 4 [Source:RGD Symbol;Acc:2711]	1.77573	2.8625	1.51947	0.725115	0.747971	0.866538	2.63192	1.39612	up
ko04068	FoxO signaling pathway	0.0796598	ENSRNOG00000018815	Plk1	K06631	EC:2.7.11.21	polo-like kinase 1 [Source:RGD Symbol;Acc:3352]	4.81308	4.27321	4.3835	1.00901	1.56844	1.31794	3.45788	1.78989	up
ko04068	FoxO signaling pathway	0.0796598	ENSRNOG00000019048	Sod2	K04564	EC:1.15.1.1	superoxide dismutase 2 [Source:RGD Symbol;Acc:3732]	144.337	78.5731	208.619	61.5879	59.3721	55.3391	2.44771	1.29143	up
ko04068	FoxO signaling pathway	0.0796598	ENSRNOG00000051964	LOC108348190	K04357	NA	uncharacterized LOC108348190 [Source:RGD Symbol;Acc:11520363]	0.212498	0.315292	0.147029	0.358931	0.514377	0.568232	0.468124	-1.09504	down
ko04068	FoxO signaling pathway	0.0796598	ENSRNOG00000055111	AABR07000658	K21770	NA	cyclin B2-like [Source:NCBI gene;Acc:100364016]	5.51022	5.51102	6.25636	0.973042	1.20114	1.81881	4.32698	2.11336	up
ko04068	FoxO signaling pathway	0.0796598	ENSRNOG00000058539	Ccnb1	K05868	NA	cyclin B1 [Source:RGD Symbol;Acc:2291]	6.84248	5.36905	7.00748	1.32879	2.37311	1.92021	3.41846	1.77335	up
ko04068	FoxO signaling pathway	0.0796598	ENSRNOG00000061450	Homer2	NA	NA	homer scaffold protein 2 [Source:RGD Symbol;Acc:620705]	4.73041	3.65681	6.65178	1.8	1.79213	2.06823	2.6569	1.40974	up
ko04658	Th1 and Th2 cell differentiation	0.080476	ENSRNOG00000003298	Cd247	K06453	NA	Cd247 molecule [Source:RGD Symbol;Acc:2305]	3.27195	2.92367	1.71789	6.18881	10.0058	6.84293	0.343505	-1.5416	down
ko04658	Th1 and Th2 cell differentiation	0.080476	ENSRNOG00000007270	Il12rb2	K05064	NA	interleukin 12 receptor subunit beta 2 [Source:RGD Symbol;Acc:620026]	0.854936	0.779215	0.717746	1.59409	2.39643	2.03746	0.390164	-1.35785	down
ko04658	Th1 and Th2 cell differentiation	0.080476	ENSRNOG00000007468	Ifng	K04687	NA	interferon gamma [Source:RGD Symbol;Acc:2866]	0	0	0	0.111509	0.315579	0.259981	0.000436637	-11.1613	down
ko04658	Th1 and Th2 cell differentiation	0.080476	ENSRNOG00000009427	Tbx21	K10166	NA	T-box 21 [Source:RGD Symbol;Acc:1308264]	2.73093	3.08446	0.760526	5.84379	17.6681	7.66245	0.21094	-2.24509	down
ko04658	Th1 and Th2 cell differentiation	0.080476	ENSRNOG00000009705	Lck	K05856	EC:2.7.10.2	LCK proto-oncogene, Src family tyrosine kinase [Source:RGD Symbol;Acc:2994]	6.96253	7.70444	4.6759	11.8213	21.1914	13.3951	0.416803	-1.26256	down
ko04658	Th1 and Th2 cell differentiation	0.080476	ENSRNOG00000015994	Cd3d	K06450	NA	CD3d molecule [Source:RGD Symbol;Acc:2304]	2.36595	1.55482	1.11031	3.79028	4.24872	4.54988	0.399646	-1.32321	down
ko04658	Th1 and Th2 cell differentiation	0.080476	ENSRNOG00000016995	Zap70	K07360	EC:2.7.10.2	zeta chain of T cell receptor associated protein kinase 70 [Source:RGD Symbol;Acc:3983]	1.91387	2.38414	1.62197	5.55549	9.51381	5.03816	0.294417	-1.76407	down
ko04658	Th1 and Th2 cell differentiation	0.080476	ENSRNOG00000017429	Lat	K07362	NA	linker for activation of T cells [Source:RGD Symbol;Acc:620802]	7.77653	7.11948	5.88298	20.675	13.8754	9.08614	0.476183	-1.07041	down
ko04658	Th1 and Th2 cell differentiation	0.080476	ENSRNOG00000019216	Il12rb1	K05063	NA	interleukin 12 receptor subunit beta 1 [Source:RGD Symbol;Acc:620025]	0.585973	0.344356	0.316211	1.4795	2.72557	0.888842	0.244712	-2.03084	down
ko04658	Th1 and Th2 cell differentiation	0.080476	ENSRNOG00000047864	LOC108348072	K06752	NA	RT1 class II, locus DMa [Source:RGD Symbol;Acc:735053]	18.1206	19.1445	16.0483	10.0005	6.31184	7.37897	2.25034	1.17014	up
ko04658	Th1 and Th2 cell differentiation	0.080476	ENSRNOG00000048636	Il2rb	K05069	NA	interleukin 2 receptor subunit beta [Source:RGD Symbol;Acc:2896]	6.32093	7.65754	3.20297	18.9429	37.4261	22.1126	0.218923	-2.1915	down
ko04658	Th1 and Th2 cell differentiation	0.080476	ENSRNOG00000054217	Runx3	K09279	NA	runt-related transcription factor 3 [Source:RGD Symbol;Acc:620082]	1.64587	1.86797	1.86746	2.8848	5.93792	4.22181	0.412533	-1.27742	down
ko00450	Selenocompound metabolism	0.080972	ENSRNOG00000010658	LOC103691744	K01758	EC:4.4.1.1	cystathionine gamma-lyase [Source:RGD Symbol;Acc:2443]	1.72844	1.6746	1.53199	4.58381	5.24453	6.34443	0.305145	-1.71244	down
ko00450	Selenocompound metabolism	0.080972	ENSRNOG00000011250	Inmt	K00562	2.1.1.96;EC:2.1.1.49	indolethylamine N-methyltransferase [Source:RGD Symbol;Acc:1597087]	3.66093	5.49999	4.98651	24.0863	24.6536	26.4062	0.188266	-2.40916	down
ko00450	Selenocompound metabolism	0.080972	ENSRNOG00000057089	LOC103691744	K01758	EC:4.4.1.1	cystathionine gamma-lyase [Source:RGD Symbol;Acc:9153842]	0.806858	0.739301	0.690909	1.97614	2.33543	1.63968	0.375898	-1.41159	down
ko00450	Selenocompound metabolism	0.080972	ENSRNOG00000059810	Txnrd3	K22182	EC:1.8.1.9	thioredoxin reductase 3 [Source:RGD Symbol;Acc:1308363]	9.8152	9.4471	9.28252	3.26938	2.99361	3.31977	2.97877	1.57471	up
ko04514	Cell adhesion molecules (CAMs)	0.0856498	ENSRNOG00000001476	Cldn4	K06087	NA	claudin 4 [Source:RGD Symbol;Acc:1307932]	13.9115	12.0102	14.9617	3.95699	3.62557	4.40384	3.41082	1.77012	up
ko04514	Cell adhesion molecules (CAMs)	0.0856498	ENSRNOG00000001926	Cldn1	K06087	NA	claudin 1 [Source:RGD Symbol;Acc:68422]	0.854451	0.532531	0.439747	1.26286	1.16606	2.36597	0.380974	-1.39223	down
ko04514	Cell adhesion molecules (CAMs)	0.0856498	ENSRNOG00000002723	Sele	K06494	NA	selectin E [Source:RGD Symbol;Acc:3654]	2.98187	1.19921	3.6168	0.289072	0.400788	0.3301	7.64528	2.93457	up
ko04514	Cell adhesion molecules (CAMs)	0.0856498	ENSRNOG00000002776	Sell	NA	NA	selectin L [Source:RGD Symbol;Acc:3655]	4.08356	3.42413	3.10125	10.9568	7.5716	15.9543	0.30766	-1.70059	down
ko04514	Cell adhesion molecules (CAMs)	0.0856498	ENSRNOG00000002794	Selp	K06496	NA	selectin P [Source:RGD Symbol;Acc:3656]	3.596	2.43421	6.01392	1.27506	1.4035	1.324	3.0091	1.58933	up
ko04514	Cell adhesion molecules (CAMs)	0.0856498	ENSRNOG00000003648	Cldn6	K06087	NA	claudin 6 [Source:RGD Symbol;Acc:1308837]	5.55802	3.20902	3.03748	0.538814	0.51741	0.201333	9.38687	3.23064	up
ko04514	Cell adhesion molecules (CAMs)	0.0856498	ENSRNOG00000004438	Cntn1	K06759	NA	contactin 1 [Source:RGD Symbol;Acc:621300]	0.603188	1.23802	0.584036	2.03437	2.22048	2.31847	0.368953	-1.43849	down
ko04514	Cell adhesion molecules (CAMs)	0.0856498	ENSRNOG00000006569	Itgb8	K06591	NA	integrin subunit beta 8 [Source:RGD Symbol;Acc:1311374]	2.69064	1.81036	3.42008	1.06221	1.22856	0.71459	2.63565	1.39816	up
ko04514	Cell adhesion molecules (CAMs)	0.0856498	ENSRNOG00000007178	Cd8a	K06458	NA	CD8a molecule [Source:RGD Symbol;Acc:2316]	6.78804	8.40062	2.99683	17.1877	29.9419	15.0684	0.292381	-1.77408	down
ko04514	Cell adhesion molecules (CAMs)	0.0856498	ENSRNOG00000010263	Cldn11	K06087	NA	claudin 11 [Source:RGD Symbol;Acc:71081]	9.74336	8.428	8.69926	2.68847	2.864	2.8561	3.19562	1.6761	up
ko04514	Cell adhesion molecules (CAMs)	0.0856498	ENSRNOG00000015279	Vtcn1	K06747	NA	V-set domain containing T cell activation inhibitor 1 [Source:RGD Symbol;Acc:1311204]	0.762873	0.43713	0.364594	0.16874	0.27284	0.227715	2.33768	1.22508	up
ko04514	Cell adhesion molecules (CAMs)	0.0856498	ENSRNOG00000019418	Lrrc4b	K16360	NA	leucine rich repeat containing 4B [Source:RGD Symbol;Acc:1307121]	0.602003	0.66977	0.312421	0.048402	0.041537	0.169391	6.1088	2.61089	up
ko04514	Cell adhesion molecules (CAMs)	0.0856498	ENSRNOG00000024000	Cd22	K06467	NA	CD22 molecule [Source:RGD Symbol;Acc:1311610]	1.79374	2.41713	1.90355	4.4542	6.11548	6.36242	0.361114	-1.46947	down
ko04514	Cell adhesion molecules (CAMs)	0.0856498	ENSRNOG00000029212	Vcan	K06793	NA	versican [Source:RGD Symbol;Acc:619940]	6.90148	5.362	6.00161	1.03357	1.05354	0.986211	5.94312	2.57122	up
ko04514	Cell adhesion molecules (CAMs)	0.0856498	ENSRNOG00000031890	Ncam1	K06491	NA	neural cell adhesion molecule 1 [Source:RGD Symbol;Acc:67378]	1.037	0.705121	0.814697	0.302133	0.414242	0.372198	2.34878	1.23191	up
ko04514	Cell adhesion molecules (CAMs)	0.0856498	ENSRNOG00000036711	Spn	K06477	NA	sialophorin [Source:RGD Symbol;Acc:3750]	8.72563	7.75418	4.61005	18.6749	31.2738	19.6607	0.302974	-1.72273	down
ko04514	Cell adhesion molecules (CAMs)	0.0856498	ENSRNOG00000047864	LOC108348072	K06752	NA	RT1 class II, locus DMa [Source:RGD Symbol;Acc:735053]	18.1206	19.1445	16.0483	10.0005	6.31184	7.37897	2.25034	1.17014	up
ko04514	Cell adhesion molecules (CAMs)	0.0856498	ENSRNOG00000050220	Nrxn1	K07377	NA	neurexin 1 [Source:RGD Symbol;Acc:628659]	0.30257	0.608225	0.202044	0.769863	0.805546	0.826987	0.463221	-1.11023	down
ko04514	Cell adhesion molecules (CAMs)	0.0856498	ENSRNOG00000061230	L1cam	K06550	NA	L1 cell adhesion molecule [Source:RGD Symbol;Acc:619777]	0.831666	0.83209	0.561794	2.66189	2.62247	1.37554	0.334171	-1.58134	down
ko00980	Metabolism of xenobiotics by cytochrome P450	0.100691	ENSRNOG00000002331	Aldh3a1	K00129	EC:1.2.1.5	aldehyde dehydrogenase 3 family, member A1 [Source:RGD Symbol;Acc:2088]	0.906245	1.33741	0.734843	3.9607	3.15494	3.58458	0.278359	-1.84498	down
ko00980	Metabolism of xenobiotics by cytochrome P450	0.100691	ENSRNOG00000006583	Hpgds	K04097	2.5.1.18;EC:5.3.99.2	hematopoietic prostaglandin D synthase [Source:RGD Symbol;Acc:69251]	1.69319	0.758445	0.936303	0.319459	0.37114	0.312633	3.37703	1.75575	up
ko00980	Metabolism of xenobiotics by cytochrome P450	0.100691	ENSRNOG00000012458	Cyp2e1	K07415	EC:1.14.13.-	cytochrome P450, family 2, subfamily e, polypeptide 1 [Source:RGD Symbol;Acc:2475]	1.59029	2.0422	0.503894	11.7452	14.7012	19.1101	0.090797	-3.46121	down
ko00980	Metabolism of xenobiotics by cytochrome P450	0.100691	ENSRNOG00000019017	Gstm6	K00799	EC:2.5.1.18	glutathione S-transferase, mu 6 [Source:RGD Symbol;Acc:1563391]	0.072552	0.084308	0.123574	0.465283	0.252652	0.528694	0.224954	-2.1523	down
ko00980	Metabolism of xenobiotics by cytochrome P450	0.100691	ENSRNOG00000032959	Adh7	K13951	EC:1.1.1.1	alcohol dehydrogenase 7 (class IV), mu or sigma polypeptide [Source:RGD Symbol;Acc:621638]	2.43511	3.44985	1.51791	5.94367	5.77427	4.45965	0.457601	-1.12784	down
ko00980	Metabolism of xenobiotics by cytochrome P450	0.100691	ENSRNOG00000049693	LOC108348130	NA	NA	carbonyl reductase [NADPH] 1-like [Source:RGD Symbol;Acc:11442152]	7.24281	7.17512	5.4403	2.60448	2.92941	3.18259	2.27824	1.18792	up
ko00980	Metabolism of xenobiotics by cytochrome P450	0.100691	ENSRNOG00000049743	Gstm5	K00799	EC:2.5.1.18	glutathione S-transferase, mu 5 [Source:RGD Symbol;Acc:61964]	14.3618	10.7391	15.0375	7.82087	6.10415	5.18534	2.10035	1.07063	up
ko00980	Metabolism of xenobiotics by cytochrome P450	0.100691	ENSRNOG00000049911	LOC102556347	K00079	1.1.1.189;1.1.1.197;EC:1.1.1.184	carbonyl reductase [NADPH] 1-like [Source:RGD Symbol;Acc:7631561]	6.25328	7.7087	5.80579	2.8922	3.25204	3.50149	2.04938	1.03519	up
ko05222	Small cell lung cancer	0.104376	ENSRNOG00000000521	Cdkn1a	K06625	NA	cyclin-dependent kinase inhibitor 1A [Source:RGD Symbol;Acc:69328]	60.966	98.6015	55.2437	36.6148	37.2161	27.4646	2.12064	1.0845	up
ko05222	Small cell lung cancer	0.104376	ENSRNOG00000002525	Ptgs2	NA	NA	prostaglandin-endoperoxide synthase 2 [Source:RGD Symbol;Acc:620349]	1.16561	3.47891	3.42764	1.65163	1.08205	1.05589	2.1301	1.09092	up
ko05222	Small cell lung cancer	0.104376	ENSRNOG00000014130	Cks2	K02219	NA	CDC28 protein kinase regulatory subunit 2 [Source:RGD Symbol;Acc:1562047]	10.9467	10.8736	11.7058	5.25151	5.01849	3.99499	2.35024	1.23281	up
ko05222	Small cell lung cancer	0.104376	ENSRNOG00000014288	Fn1	K05717	NA	fibronectin 1 [Source:RGD Symbol;Acc:2624]	280.945	248.379	229.735	57.4707	64.5711	77.3481	3.80691	1.92862	up
ko05222	Small cell lung cancer	0.104376	ENSRNOG00000014786	Ccne1	K06626	NA	cyclin E1 [Source:RGD Symbol;Acc:2294]	1.62725	1.32867	1.53513	0.320929	0.475594	0.655549	3.09286	1.62894	up
ko05222	Small cell lung cancer	0.104376	ENSRNOG00000016281	Col4a1	K06237	NA	collagen type IV alpha 1 chain [Source:RGD Symbol;Acc:1307148]	228.604	293.978	253.367	78.1782	93.3833	113.433	2.72268	1.44503	up
ko05222	Small cell lung cancer	0.104376	ENSRNOG00000017237	Lama1	K05637	NA	laminin subunit alpha 1 [Source:RGD Symbol;Acc:1307207]	0.012656	0.0023	0.040977	0	0	0	186.443	7.54259	up
ko05222	Small cell lung cancer	0.104376	ENSRNOG00000023972	Col4a2	K06237	NA	collagen type IV alpha 2 chain [Source:RGD Symbol;Acc:1308085]	134.643	170.785	148.447	55.5573	64.3337	79.1798	2.27997	1.18901	up
ko05222	Small cell lung cancer	0.104376	ENSRNOG00000042561	Cks1b	K02219	NA	CDC28 protein kinase regulatory subunit 1B [Source:RGD Symbol;Acc:1561797]	9.1525	9.15957	11.4193	3.22174	4.03177	2.93054	2.9194	1.54567	up
ko05222	Small cell lung cancer	0.104376	ENSRNOG00000056129	LOC102554659	K06247	NA	laminin subunit gamma-3-like [Source:RGD Symbol;Acc:7518353]	0.143205	0.092271	0.140703	0.320804	0.459925	0.441261	0.307841	-1.69974	down
ko05222	Small cell lung cancer	0.104376	ENSRNOG00000058111	Itga2	K06481	NA	integrin subunit alpha 2 [Source:RGD Symbol;Acc:621632]	2.02287	2.41017	1.73864	0.541871	0.886078	0.645843	2.97604	1.57339	up
ko05222	Small cell lung cancer	0.104376	ENSRNOG00000059507	Lamc3	K06247	NA	laminin subunit gamma 3 [Source:RGD Symbol;Acc:1309399]	0.642198	0.669721	0.48091	1.12057	1.16744	1.51648	0.47124	-1.08547	down
ko04960	Aldosterone-regulated sodium reabsorption	0.114693	ENSRNOG00000007290	Atp1a2	K01539	EC:7.2.2.13	ATPase Na+/K+ transporting subunit alpha 2 [Source:RGD Symbol;Acc:2168]	1.11361	2.2107	0.439613	6.71531	7.20043	7.69308	0.174185	-2.52131	down
ko04960	Aldosterone-regulated sodium reabsorption	0.114693	ENSRNOG00000017610	Nedd4l	K13305	EC:2.3.2.26	neural precursor cell expressed, developmentally down-regulated 4-like, E3 ubiquitin protein ligase [Source:RGD Symbol;Acc:735047]	15.8937	16.8247	12.5733	27.7616	32.0436	32.6946	0.489642	-1.0302	down
ko04960	Aldosterone-regulated sodium reabsorption	0.114693	ENSRNOG00000019368	Scnn1a	K04824	NA	sodium channel epithelial 1 alpha subunit [Source:RGD Symbol;Acc:3639]	58.4143	57.3811	52.8678	132.105	161.056	139.405	0.389913	-1.35878	down
ko04960	Aldosterone-regulated sodium reabsorption	0.114693	ENSRNOG00000033153	Sfn	K06644	NA	stratifin [Source:RGD Symbol;Acc:1304729]	22.9356	14.9716	33.5055	3.57864	3.88086	2.31316	7.3074	2.86936	up
ko04960	Aldosterone-regulated sodium reabsorption	0.114693	ENSRNOG00000034007	Nr3c2	K08555	NA	nuclear receptor subfamily 3, group C, member 2 [Source:RGD Symbol;Acc:3094]	1.60799	1.82245	0.806464	3.07499	3.42049	3.68219	0.416294	-1.26432	down
ko04960	Aldosterone-regulated sodium reabsorption	0.114693	ENSRNOG00000054371	Prkcg	K19663	EC:2.7.11.13	protein kinase C, gamma [Source:RGD Symbol;Acc:3397]	1.53377	1.93347	1.8286	3.48216	4.70262	3.15826	0.46688	-1.09888	down
ko05219	Bladder cancer	0.114693	ENSRNOG00000000521	Cdkn1a	K06625	NA	cyclin-dependent kinase inhibitor 1A [Source:RGD Symbol;Acc:69328]	60.966	98.6015	55.2437	36.6148	37.2161	27.4646	2.12064	1.0845	up
ko05219	Bladder cancer	0.114693	ENSRNOG00000016695	Mmp2	K01398	EC:3.4.24.24	matrix metallopeptidase 2 [Source:RGD Symbol;Acc:621316]	112.629	84.3299	76.9475	30.7938	26.2646	32.2348	3.06749	1.61706	up
ko05219	Bladder cancer	0.114693	ENSRNOG00000017539	Mmp9	K01403	EC:3.4.24.35	matrix metallopeptidase 9 [Source:RGD Symbol;Acc:621320]	0.708985	0.326444	0.167858	0.688657	1.06294	1.59762	0.359274	-1.47684	down
ko05219	Bladder cancer	0.114693	ENSRNOG00000045829	Thbs1	K16857	NA	thrombospondin 1 [Source:RGD Symbol;Acc:1588455]	69.4641	106.372	164.303	19.9347	19.858	26.7682	5.11019	2.35338	up
ko05219	Bladder cancer	0.114693	ENSRNOG00000051964	LOC108348190	K04357	NA	uncharacterized LOC108348190 [Source:RGD Symbol;Acc:11520363]	0.212498	0.315292	0.147029	0.358931	0.514377	0.568232	0.468124	-1.09504	down
ko05219	Bladder cancer	0.114693	ENSRNOG00000059837	Cdkn2a	K06621	NA	cyclin-dependent kinase inhibitor 2A [Source:RGD Symbol;Acc:2323]	1.75201	2.25335	0.861979	0.590342	0.229968	0.204869	4.7478	2.24726	up
ko04071	Sphingolipid signaling pathway	0.119493	ENSRNOG00000003442	Adora1	NA	NA	adenosine A1 receptor [Source:RGD Symbol;Acc:2048]	2.22958	2.85704	1.93044	0.530347	0.128806	0.423696	6.48019	2.69604	up
ko04071	Sphingolipid signaling pathway	0.119493	ENSRNOG00000005370	S1pr4	K04293	NA	sphingosine-1-phosphate receptor 4 [Source:RGD Symbol;Acc:1304801]	4.28814	4.99459	2.38803	7.72174	10.0489	8.44379	0.445203	-1.16746	down
ko04071	Sphingolipid signaling pathway	0.119493	ENSRNOG00000007637	Acer2	K01441	EC:3.5.1.23	alkaline ceramidase 2 [Source:RGD Symbol;Acc:1304629]	45.3088	74.0441	75.5933	129.285	143.009	166.017	0.444766	-1.16888	down
ko04071	Sphingolipid signaling pathway	0.119493	ENSRNOG00000009177	Fcer1a	K08089	NA	Fc fragment of IgE receptor Ia [Source:RGD Symbol;Acc:2597]	11.7309	2.89785	1.78742	1.47421	0.54891	1.09037	5.27258	2.39851	up
ko04071	Sphingolipid signaling pathway	0.119493	ENSRNOG00000011716	Degs2	K04712	1.14.18.5;EC:1.14.19.17	delta(4)-desaturase, sphingolipid 2 [Source:RGD Symbol;Acc:1305023]	4.05956	3.67362	2.40716	1.00169	1.31274	2.01497	2.34221	1.22787	up
ko04071	Sphingolipid signaling pathway	0.119493	ENSRNOG00000015603	Prkce	NA	NA	protein kinase C, epsilon [Source:RGD Symbol;Acc:61925]	7.93806	8.81436	6.50926	11.1812	15.7408	20.6574	0.488903	-1.03238	down
ko04071	Sphingolipid signaling pathway	0.119493	ENSRNOG00000015788	Adora3	K04268	NA	adenosine receptor A3-like [Source:RGD Symbol;Acc:6491091]	0.981793	0.693858	1.55777	0.343286	0.434004	0.264949	3.10238	1.63338	up
ko04071	Sphingolipid signaling pathway	0.119493	ENSRNOG00000018851	Ppp2r2b	K04354	NA	protein phosphatase 2, regulatory subunit B, beta [Source:RGD Symbol;Acc:631441]	3.16847	2.77345	3.60839	1.62792	1.1151	0.816664	2.68291	1.4238	up
ko04071	Sphingolipid signaling pathway	0.119493	ENSRNOG00000020901	S1pr5	K04295	NA	sphingosine-1-phosphate receptor 5 [Source:RGD Symbol;Acc:620566]	1.79483	2.09013	0.765311	6.22649	10.6507	5.08636	0.211726	-2.23973	down
ko04071	Sphingolipid signaling pathway	0.119493	ENSRNOG00000020993	Ms4a2	K08090	NA	membrane spanning 4-domains A2 [Source:RGD Symbol;Acc:2598]	7.02676	2.45204	1.76553	1.26067	0.858921	0.875766	3.75392	1.9084	up
ko04071	Sphingolipid signaling pathway	0.119493	ENSRNOG00000030387	Kng1	K03898	NA	kininogen 1 [Source:RGD Symbol;Acc:1359376]	21.2306	13.4328	16.0391	1.66566	2.34674	4.32674	6.08007	2.60409	up
ko04071	Sphingolipid signaling pathway	0.119493	ENSRNOG00000033119	Plcb4	K05858	EC:3.1.4.11	phospholipase C, beta 4 [Source:RGD Symbol;Acc:3345]	7.14989	7.94063	6.17429	13.1434	15.847	14.3553	0.490587	-1.02742	down
ko04071	Sphingolipid signaling pathway	0.119493	ENSRNOG00000050743	LOC100911796	K04268	NA	adenosine A3 receptor [Source:RGD Symbol;Acc:2051]	0.956667	0.670742	1.53251	0.339604	0.292693	0.26951	3.50399	1.809	up
ko04071	Sphingolipid signaling pathway	0.119493	ENSRNOG00000054371	Prkcg	K19663	EC:2.7.11.13	protein kinase C, gamma [Source:RGD Symbol;Acc:3397]	1.53377	1.93347	1.8286	3.48216	4.70262	3.15826	0.46688	-1.09888	down
ko04071	Sphingolipid signaling pathway	0.119493	ENSRNOG00000062030	Cers1	K04710	EC:2.3.1.24	ceramide synthase 1 [Source:RGD Symbol;Acc:1305974]	0.441764	1.11004	0.488073	1.21572	1.53219	1.3981	0.49201	-1.02324	down
ko04390	Hippo signaling pathway	0.123422	ENSRNOG00000001414	Serpine1	NA	NA	serpin family E member 1 [Source:RGD Symbol;Acc:3249]	55.409	67.7847	164.683	7.58747	10.5169	14.5605	8.81302	3.13964	up
ko04390	Hippo signaling pathway	0.123422	ENSRNOG00000002418	Tgfb2	K13376	NA	transforming growth factor, beta 2 [Source:RGD Symbol;Acc:70491]	32.2616	34.4352	34.8496	12.3645	10.9716	12.4504	2.83756	1.50465	up
ko04390	Hippo signaling pathway	0.123422	ENSRNOG00000002754	Areg	K09782	NA	amphiregulin [Source:RGD Symbol;Acc:2149]	15.0098	32.3225	41.5271	12.678	12.7718	5.23223	2.89613	1.53413	up
ko04390	Hippo signaling pathway	0.123422	ENSRNOG00000007810	Gdf6	K20012	NA	growth differentiation factor 6 [Source:RGD Symbol;Acc:620104]	0.222642	0.323762	0.898277	0.028828	0.075581	0.015319	12.0664	3.59292	up
ko04390	Hippo signaling pathway	0.123422	ENSRNOG00000008788	Mpp5	K06091	NA	membrane palmitoylated protein 5 [Source:RGD Symbol;Acc:1308071]	13.5832	14.8236	11.9436	29.4061	30.2001	29.5302	0.452682	-1.14343	down
ko04390	Hippo signaling pathway	0.123422	ENSRNOG00000009867	Tgfb3	K13377	NA	transforming growth factor, beta 3 [Source:RGD Symbol;Acc:3851]	28.04	20.6768	22.6266	8.0599	7.08636	6.45932	3.30208	1.72338	up
ko04390	Hippo signaling pathway	0.123422	ENSRNOG00000014385	Wnt2b	K00182	NA	Wnt family member 2B [Source:RGD Symbol;Acc:69346]	1.93844	1.91525	1.50408	7.62981	5.39889	3.48382	0.324467	-1.62386	down
ko04390	Hippo signaling pathway	0.123422	ENSRNOG00000015036	Ccn2	K06827	NA	cellular communication network factor 2 [Source:RGD Symbol;Acc:621392]	218.744	343.767	345.238	124.994	151.721	144.012	2.15757	1.10941	up
ko04390	Hippo signaling pathway	0.123422	ENSRNOG00000015618	Wnt5a	K00444	NA	Wnt family member 5A [Source:RGD Symbol;Acc:69250]	7.40085	6.90616	6.99221	3.0348	2.5955	2.2052	2.7183	1.4427	up
ko04390	Hippo signaling pathway	0.123422	ENSRNOG00000015750	Wnt7b	K00572	NA	Wnt family member 7B [Source:RGD Symbol;Acc:1311441]	1.76975	1.41713	2.20033	0.207026	0.670733	0.684039	3.44937	1.78633	up
ko04390	Hippo signaling pathway	0.123422	ENSRNOG00000018851	Ppp2r2b	K04354	NA	protein phosphatase 2, regulatory subunit B, beta [Source:RGD Symbol;Acc:631441]	3.16847	2.77345	3.60839	1.62792	1.1151	0.816664	2.68291	1.4238	up
ko04390	Hippo signaling pathway	0.123422	ENSRNOG00000021276	Bmp2	NA	NA	bone morphogenetic protein 2 [Source:RGD Symbol;Acc:2211]	3.40519	7.43167	5.53057	2.54594	1.70193	2.53326	2.41367	1.27123	up
ko04390	Hippo signaling pathway	0.123422	ENSRNOG00000022635	Dlg2	K12075	NA	discs large MAGUK scaffold protein 2 [Source:RGD Symbol;Acc:619895]	2.22808	1.43888	1.17353	0.488068	0.348309	0.892297	2.80012	1.48549	up
ko04390	Hippo signaling pathway	0.123422	ENSRNOG00000022784	Fzd10	K02842	NA	frizzled class receptor 10 [Source:RGD Symbol;Acc:1583825]	0.099555	0.232361	0.089789	0.016885	0.017521	0.023113	7.33158	2.87412	up
ko04390	Hippo signaling pathway	0.123422	ENSRNOG00000025498	Crb2	K16681	NA	crumbs cell polarity complex component 2 [Source:RGD Symbol;Acc:1309368]	1.62528	0.959169	2.13547	1.09475	0.725931	0.361578	2.16286	1.11294	up
ko04390	Hippo signaling pathway	0.123422	ENSRNOG00000030155	Bmp8a	K16622	NA	bone morphogenetic protein 8a [Source:RGD Symbol;Acc:1585858]	0.24594	0.142431	0.13281	0.675516	0.572486	0.397535	0.316724	-1.6587	down
ko04390	Hippo signaling pathway	0.123422	ENSRNOG00000033209	Bmp8b	K16622	NA	bone morphogenetic protein 8b [Source:RGD Symbol;Acc:1591873]	0.366519	0.45209	0.546395	1.03207	1.66145	1.31074	0.340888	-1.55263	down
ko04390	Hippo signaling pathway	0.123422	ENSRNOG00000050819	Birc5	K08731	NA	baculoviral IAP repeat-containing 5 [Source:RGD Symbol;Acc:70499]	6.52015	7.59906	9.03216	1.48435	2.46768	2.33775	3.68079	1.88002	up
ko05322	Systemic lupus erythematosus	0.150996	ENSRNOG00000007468	Ifng	K04687	NA	interferon gamma [Source:RGD Symbol;Acc:2866]	0	0	0	0.111509	0.315579	0.259981	0.000436637	-11.1613	down
ko05322	Systemic lupus erythematosus	0.150996	ENSRNOG00000011796	C1r	K01330	EC:3.4.21.41	complement C1r [Source:RGD Symbol;Acc:1309091]	123.094	95.9083	133.697	50.3805	41.8088	43.88	2.59206	1.3741	up
ko05322	Systemic lupus erythematosus	0.150996	ENSRNOG00000011971	C1s	K01331	EC:3.4.21.42	complement C1s [Source:RGD Symbol;Acc:619983]	123.565	79.6933	122.779	33.0371	24.7081	21.0409	4.13826	2.04903	up
ko05322	Systemic lupus erythematosus	0.150996	ENSRNOG00000012749	C1qb	NA	NA	complement C1q B chain [Source:RGD Symbol;Acc:2229]	68.8056	59.044	60.4535	22.5219	17.5828	21.0046	3.08141	1.62359	up
ko05322	Systemic lupus erythematosus	0.150996	ENSRNOG00000012804	C1qc	K03988	NA	complement C1q C chain [Source:RGD Symbol;Acc:1306828]	74.9961	68.9488	69.0432	27.4504	22.6791	29.6529	2.66961	1.41663	up
ko05322	Systemic lupus erythematosus	0.150996	ENSRNOG00000012807	C1qa	K03986	NA	complement C1q A chain [Source:RGD Symbol;Acc:1306716]	101.115	87.5529	87.2321	25.1176	20.886	29.14	3.67164	1.87642	up
ko05322	Systemic lupus erythematosus	0.150996	ENSRNOG00000013736	C9	K04000	NA	complement C9 [Source:RGD Symbol;Acc:620319]	2.32761	1.63723	1.69646	0.095381	0.17503	0.090134	15.702	3.97288	up
ko05322	Systemic lupus erythematosus	0.150996	ENSRNOG00000024751	Macroh2a2	K11251	NA	H2A histone family, member Y2 [Source:RGD Symbol;Acc:1561371]	2.09096	2.37019	1.48839	0.833557	0.533336	1.24376	2.27895	1.18837	up
ko05322	Systemic lupus erythematosus	0.150996	ENSRNOG00000047657	C4a	K03989	NA	complement C4A [Source:RGD Symbol;Acc:620005]	237.873	241.958	309.397	129.43	75.4955	80.8113	2.76208	1.46576	up
ko05322	Systemic lupus erythematosus	0.150996	ENSRNOG00000047864	LOC108348072	K06752	NA	RT1 class II, locus DMa [Source:RGD Symbol;Acc:735053]	18.1206	19.1445	16.0483	10.0005	6.31184	7.37897	2.25034	1.17014	up
ko05322	Systemic lupus erythematosus	0.150996	ENSRNOG00000049096	Mcpt8l2	K01319	EC:3.4.21.20	mast cell protease 8-like 2 [Source:RGD Symbol;Acc:1302938]	19.7922	6.79392	4.06669	2.27301	0.99425	1.45419	6.49224	2.69872	up
ko05322	Systemic lupus erythematosus	0.150996	ENSRNOG00000049991	Mcpt8l3	K01319	EC:3.4.21.20	mast cell protease 8-like 3 [Source:RGD Symbol;Acc:1302975]	6.48812	1.91135	1.06625	0.881239	0.828065	0.794557	3.78045	1.91856	up
ko05322	Systemic lupus erythematosus	0.150996	ENSRNOG00000056281	Hist1h2ail1	K11253	NA	histone cluster 1 H3 family member A [Source:RGD Symbol;Acc:1598076]	0.375499	0.176989	0.267884	0	0	0	2734.57	11.4171	up
ko05322	Systemic lupus erythematosus	0.150996	ENSRNOG00000056756	Actn1	K05699	NA	actinin, alpha 1 [Source:RGD Symbol;Acc:70907]	53.4333	54.3079	64.5786	24.6416	28.3915	29.6839	2.08324	1.05883	up
ko04976	Bile secretion	0.153422	ENSRNOG00000007290	Atp1a2	K01539	EC:7.2.2.13	ATPase Na+/K+ transporting subunit alpha 2 [Source:RGD Symbol;Acc:2168]	1.11361	2.2107	0.439613	6.71531	7.20043	7.69308	0.174185	-2.52131	down
ko04976	Bile secretion	0.153422	ENSRNOG00000008012	Abcb4	K05658;K05659	EC:7.6.2.2	ATP binding cassette subfamily B member 1A [Source:RGD Symbol;Acc:619951]	3.31043	3.55892	2.92492	5.5518	10.3897	15.0847	0.315677	-1.66348	down
ko04976	Bile secretion	0.153422	ENSRNOG00000010378	Slc4a5	K13857	NA	solute carrier family 4 member 5 [Source:RGD Symbol;Acc:1303009]	2.89448	2.36503	2.37639	3.52175	6.06493	6.19471	0.483855	-1.04735	down
ko04976	Bile secretion	0.153422	ENSRNOG00000016337	Slc22a1	K08198	NA	solute carrier family 22 member 1 [Source:RGD Symbol;Acc:3224]	0.503858	0.992112	0.350748	0.228038	0	0.02532	7.28897	2.86571	up
ko04976	Bile secretion	0.153422	ENSRNOG00000017775	Slc5a1	K14158	NA	solute carrier family 5 member 1 [Source:RGD Symbol;Acc:3713]	2.87528	4.73317	3.87475	10.0856	8.08971	9.71798	0.411683	-1.28039	down
ko04976	Bile secretion	0.153422	ENSRNOG00000017873	Sct	K05263	NA	secretin [Source:RGD Symbol;Acc:3643]	2.3567	3.70786	3.37265	0.308273	0.702983	0.388027	6.74431	2.75367	up
ko04976	Bile secretion	0.153422	ENSRNOG00000031249	Slco1a2	K03460	NA	solute carrier organic anion transporter family, member 1A2 [Source:RGD Symbol;Acc:70985]	3.82369	4.11683	3.76795	8.07921	13.9358	10.8332	0.356442	-1.48826	down
ko04976	Bile secretion	0.153422	ENSRNOG00000055103	Cftr	K05031	EC:5.6.1.6	cystic fibrosis transmembrane conductance regulator [Source:RGD Symbol;Acc:2332]	3.08251	3.45411	2.56982	1.14851	0.941143	0.718715	3.2426	1.69715	up
ko04976	Bile secretion	0.153422	ENSRNOG00000059479	Adcy1	K08041	EC:4.6.1.1	adenylate cyclase 1 [Source:RGD Symbol;Acc:1309318]	0.206208	0.356452	0.124273	1.28217	1.19576	1.45355	0.174726	-2.51683	down
ko00250	Alanine, aspartate and glutamate metabolism	0.162707	ENSRNOG00000002636	Abat	K13524	2.6.1.22;EC:2.6.1.19	4-aminobutyrate aminotransferase [Source:RGD Symbol;Acc:620948]	0.050641	0.092212	0.036326	0.388185	0.10771	0.25824	0.237595	-2.07342	down
ko00250	Alanine, aspartate and glutamate metabolism	0.162707	ENSRNOG00000002810	Gfpt2	K00820	EC:2.6.1.16	glutamine-fructose-6-phosphate transaminase 2 [Source:RGD Symbol;Acc:1303097]	3.16578	2.40118	5.7713	1.65107	1.01578	1.41882	2.77513	1.47255	up
ko00250	Alanine, aspartate and glutamate metabolism	0.162707	ENSRNOG00000033915	Gpt	K00814	EC:2.6.1.2	glutamic--pyruvic transaminase [Source:RGD Symbol;Acc:621720]	25.0277	22.9063	27.1695	56.5881	55.0764	53.6412	0.454331	-1.13819	down
ko00250	Alanine, aspartate and glutamate metabolism	0.162707	ENSRNOG00000043116	RGD1308564	K03334	EC:1.4.3.2	similar to L-amino acid oxidase 1 [Source:RGD Symbol;Acc:1308564]	0.026424	0	0	0.340514	0.096658	0.17216	0.0433655	-4.52731	down
ko00250	Alanine, aspartate and glutamate metabolism	0.162707	ENSRNOG00000049351	Nat8l	K18309	EC:2.3.1.17	N-acetyltransferase 8-like [Source:RGD Symbol;Acc:1305719]	1.04572	1.14925	0.73808	0.414609	0.359825	0.569127	2.18304	1.12634	up
ko04114	Oocyte meiosis	0.172886	ENSRNOG00000000632	Cdk1	K02087	2.7.11.23;EC:2.7.11.22	cyclin-dependent kinase 1 [Source:RGD Symbol;Acc:2319]	13.2074	15.3817	18.7413	2.64068	4.12548	3.85137	4.45776	2.15632	up
ko04114	Oocyte meiosis	0.172886	ENSRNOG00000003802	Pttg1	K06635	NA	PTTG1 regulator of sister chromatid separation, securin [Source:RGD Symbol;Acc:68359]	4.7681	5.24809	6.20749	0.786092	2.20623	1.23079	3.84164	1.94172	up
ko04114	Oocyte meiosis	0.172886	ENSRNOG00000005639	Ar	K08557	NA	androgen receptor [Source:RGD Symbol;Acc:2147]	0.44139	0.578004	0.220709	1.04348	0.79231	1.11291	0.420559	-1.24962	down
ko04114	Oocyte meiosis	0.172886	ENSRNOG00000012835	Espl1	K02365	EC:3.4.22.49	extra spindle pole bodies like 1, separase [Source:RGD Symbol;Acc:1306266]	1.25076	1.06367	1.61809	0.50097	0.851101	0.511543	2.11016	1.07735	up
ko04114	Oocyte meiosis	0.172886	ENSRNOG00000014786	Ccne1	K06626	NA	cyclin E1 [Source:RGD Symbol;Acc:2294]	1.62725	1.32867	1.53513	0.320929	0.475594	0.655549	3.09286	1.62894	up
ko04114	Oocyte meiosis	0.172886	ENSRNOG00000018712	Camk2a	K04515	EC:2.7.11.17	calcium/calmodulin-dependent protein kinase II alpha [Source:RGD Symbol;Acc:2261]	0.637376	1.01802	0.591485	1.83401	1.77662	1.39807	0.448596	-1.15651	down
ko04114	Oocyte meiosis	0.172886	ENSRNOG00000018815	Plk1	K06631	EC:2.7.11.21	polo-like kinase 1 [Source:RGD Symbol;Acc:3352]	4.81308	4.27321	4.3835	1.00901	1.56844	1.31794	3.45788	1.78989	up
ko04114	Oocyte meiosis	0.172886	ENSRNOG00000022499	Sgo1	K11580	NA	shugoshin 1 [Source:RGD Symbol;Acc:1593238]	0.889156	0.804488	0.666034	0.262421	0.213009	0.370678	2.78886	1.47968	up
ko04114	Oocyte meiosis	0.172886	ENSRNOG00000028415	Cdc20	K03363	NA	cell division cycle 20 [Source:RGD Symbol;Acc:620477]	8.20218	8.18058	9.39277	1.63592	3.33288	2.76729	3.33185	1.73632	up
ko04114	Oocyte meiosis	0.172886	ENSRNOG00000032778	Bub1	K02178	EC:2.7.11.1	BUB1 mitotic checkpoint serine/threonine kinase [Source:RGD Symbol;Acc:1311707]	4.4385	4.93863	4.9439	1.72613	2.05124	1.64995	2.6387	1.39983	up
ko04114	Oocyte meiosis	0.172886	ENSRNOG00000055111	AABR07000658	K21770	NA	cyclin B2-like [Source:NCBI gene;Acc:100364016]	5.51022	5.51102	6.25636	0.973042	1.20114	1.81881	4.32698	2.11336	up
ko04114	Oocyte meiosis	0.172886	ENSRNOG00000058539	Ccnb1	K05868	NA	cyclin B1 [Source:RGD Symbol;Acc:2291]	6.84248	5.36905	7.00748	1.32879	2.37311	1.92021	3.41846	1.77335	up
ko04114	Oocyte meiosis	0.172886	ENSRNOG00000059479	Adcy1	K08041	EC:4.6.1.1	adenylate cyclase 1 [Source:RGD Symbol;Acc:1309318]	0.206208	0.356452	0.124273	1.28217	1.19576	1.45355	0.174726	-2.51683	down
ko00480	Glutathione metabolism	0.179262	ENSRNOG00000006583	Hpgds	K04097	2.5.1.18;EC:5.3.99.2	hematopoietic prostaglandin D synthase [Source:RGD Symbol;Acc:69251]	1.69319	0.758445	0.936303	0.319459	0.37114	0.312633	3.37703	1.75575	up
ko00480	Glutathione metabolism	0.179262	ENSRNOG00000009751	Gpx7	K00432	EC:1.11.1.9	glutathione peroxidase 7 [Source:RGD Symbol;Acc:1306999]	34.5535	30.8793	25.9259	12.6551	10.1213	16.1797	2.34517	1.22969	up
ko00480	Glutathione metabolism	0.179262	ENSRNOG00000010461	Gpx8	K00432	EC:1.11.1.9	glutathione peroxidase 8 [Source:RGD Symbol;Acc:1307506]	21.4849	17.7639	19.6333	10.0044	7.93017	11.1224	2.02644	1.01895	up
ko00480	Glutathione metabolism	0.179262	ENSRNOG00000011078	LOC100912604	K00797	EC:2.5.1.16	spermidine synthase [Source:RGD Symbol;Acc:620796]	13.1947	15.2032	20.325	6.87921	2.95351	7.02155	2.89083	1.53149	up
ko00480	Glutathione metabolism	0.179262	ENSRNOG00000019017	Gstm6	K00799	EC:2.5.1.18	glutathione S-transferase, mu 6 [Source:RGD Symbol;Acc:1563391]	0.072552	0.084308	0.123574	0.465283	0.252652	0.528694	0.224954	-2.1523	down
ko00480	Glutathione metabolism	0.179262	ENSRNOG00000047697	Ggt1	K18592	3.4.19.13;3.4.19.14;EC:2.3.2.2	gamma-glutamyltransferase 1 [Source:RGD Symbol;Acc:2683]	5.05386	8.31999	4.00574	2.28075	3.11226	3.13478	2.03799	1.02715	up
ko00480	Glutathione metabolism	0.179262	ENSRNOG00000049743	Gstm5	K00799	EC:2.5.1.18	glutathione S-transferase, mu 5 [Source:RGD Symbol;Acc:61964]	14.3618	10.7391	15.0375	7.82087	6.10415	5.18534	2.10035	1.07063	up
ko00480	Glutathione metabolism	0.179262	ENSRNOG00000054286	Rrm2	K10808	EC:1.17.4.1	ribonucleotide reductase regulatory subunit M2 [Source:RGD Symbol;Acc:1598310]	8.16388	9.93891	11.9198	2.25539	2.08556	3.09141	4.03944	2.01416	up
ko00430	Taurine and hypotaurine metabolism	0.186127	ENSRNOG00000000158	Cdo1	K00456	EC:1.13.11.20	cysteine dioxygenase type 1 [Source:RGD Symbol;Acc:69262]	13.6117	16.2309	8.62663	70.0537	77.1729	66.257	0.180198	-2.47235	down
ko00430	Taurine and hypotaurine metabolism	0.186127	ENSRNOG00000047697	Ggt1	K18592	3.4.19.13;3.4.19.14;EC:2.3.2.2	gamma-glutamyltransferase 1 [Source:RGD Symbol;Acc:2683]	5.05386	8.31999	4.00574	2.28075	3.11226	3.13478	2.03799	1.02715	up
ko04530	Tight junction	0.192756	ENSRNOG00000001476	Cldn4	K06087	NA	claudin 4 [Source:RGD Symbol;Acc:1307932]	13.9115	12.0102	14.9617	3.95699	3.62557	4.40384	3.41082	1.77012	up
ko04530	Tight junction	0.192756	ENSRNOG00000001926	Cldn1	K06087	NA	claudin 1 [Source:RGD Symbol;Acc:68422]	0.854451	0.532531	0.439747	1.26286	1.16606	2.36597	0.380974	-1.39223	down
ko04530	Tight junction	0.192756	ENSRNOG00000003648	Cldn6	K06087	NA	claudin 6 [Source:RGD Symbol;Acc:1308837]	5.55802	3.20902	3.03748	0.538814	0.51741	0.201333	9.38687	3.23064	up
ko04530	Tight junction	0.192756	ENSRNOG00000008788	Mpp5	K06091	NA	membrane palmitoylated protein 5 [Source:RGD Symbol;Acc:1308071]	13.5832	14.8236	11.9436	29.4061	30.2001	29.5302	0.452682	-1.14343	down
ko04530	Tight junction	0.192756	ENSRNOG00000010263	Cldn11	K06087	NA	claudin 11 [Source:RGD Symbol;Acc:71081]	9.74336	8.428	8.69926	2.68847	2.864	2.8561	3.19562	1.6761	up
ko04530	Tight junction	0.192756	ENSRNOG00000015603	Prkce	NA	NA	protein kinase C, epsilon [Source:RGD Symbol;Acc:61925]	7.93806	8.81436	6.50926	11.1812	15.7408	20.6574	0.488903	-1.03238	down
ko04530	Tight junction	0.192756	ENSRNOG00000017610	Nedd4l	K13305	EC:2.3.2.26	neural precursor cell expressed, developmentally down-regulated 4-like, E3 ubiquitin protein ligase [Source:RGD Symbol;Acc:735047]	15.8937	16.8247	12.5733	27.7616	32.0436	32.6946	0.489642	-1.0302	down
ko04530	Tight junction	0.192756	ENSRNOG00000018851	Ppp2r2b	K04354	NA	protein phosphatase 2, regulatory subunit B, beta [Source:RGD Symbol;Acc:631441]	3.16847	2.77345	3.60839	1.62792	1.1151	0.816664	2.68291	1.4238	up
ko04530	Tight junction	0.192756	ENSRNOG00000020246	Myl9	K12755	NA	myosin light chain 9 [Source:RGD Symbol;Acc:1311235]	135.556	142.75	155.595	45.8177	50.7849	52.6763	2.90665	1.53936	up
ko04530	Tight junction	0.192756	ENSRNOG00000021569	Tiam1	K05731	NA	T-cell lymphoma invasion and metastasis 1 [Source:RGD Symbol;Acc:1307455]	2.12158	2.24547	1.49218	0.584266	1.21954	1.06253	2.04415	1.0315	up
ko04530	Tight junction	0.192756	ENSRNOG00000022533	Micall2	K21068	NA	MICAL-like 2 [Source:RGD Symbol;Acc:1307875]	4.05655	3.19132	3.64161	1.19341	1.13714	1.42827	2.89705	1.53459	up
ko04530	Tight junction	0.192756	ENSRNOG00000022635	Dlg2	K12075	NA	discs large MAGUK scaffold protein 2 [Source:RGD Symbol;Acc:619895]	2.22808	1.43888	1.17353	0.488068	0.348309	0.892297	2.80012	1.48549	up
ko04530	Tight junction	0.192756	ENSRNOG00000046276	Myh3	K10352	NA	myosin heavy chain 3 [Source:RGD Symbol;Acc:3138]	2.7365	2.20341	5.80624	0	0	0.036743	292.468	8.19213	up
ko04530	Tight junction	0.192756	ENSRNOG00000048169	Tuba8	K07374	NA	tubulin, alpha 8 [Source:RGD Symbol;Acc:1566041]	3.55351	3.77764	3.98149	0.363944	0.114367	0.307022	14.4049	3.84849	up
ko04530	Tight junction	0.192756	ENSRNOG00000049695	Myh4	K10352	NA	myosin heavy chain 2 [Source:RGD Symbol;Acc:620354]	0.925797	0.780393	2.00576	0.0269499	0.07232	0.0192854	31.3098	4.96854	up
ko04530	Tight junction	0.192756	ENSRNOG00000055103	Cftr	K05031	EC:5.6.1.6	cystic fibrosis transmembrane conductance regulator [Source:RGD Symbol;Acc:2332]	3.08251	3.45411	2.56982	1.14851	0.941143	0.718715	3.2426	1.69715	up
ko04530	Tight junction	0.192756	ENSRNOG00000056550	Epb41l4b	K21111	NA	erythrocyte membrane protein band 4.1 like 4B [Source:RGD Symbol;Acc:1562988]	3.41537	3.41587	2.8592	8.47673	9.34505	9.05211	0.36059	-1.47157	down
ko04530	Tight junction	0.192756	ENSRNOG00000056756	Actn1	K05699	NA	actinin, alpha 1 [Source:RGD Symbol;Acc:70907]	53.4333	54.3079	64.5786	24.6416	28.3915	29.6839	2.08324	1.05883	up
ko05214	Glioma	0.194214	ENSRNOG00000000521	Cdkn1a	K06625	NA	cyclin-dependent kinase inhibitor 1A [Source:RGD Symbol;Acc:69328]	60.966	98.6015	55.2437	36.6148	37.2161	27.4646	2.12064	1.0845	up
ko05214	Glioma	0.194214	ENSRNOG00000002244	Pdgfra	K04363	EC:2.7.10.1	platelet derived growth factor receptor alpha [Source:RGD Symbol;Acc:3284]	10.7913	10.4928	10.1398	22.5292	21.8926	24.1598	0.458196	-1.12596	down
ko05214	Glioma	0.194214	ENSRNOG00000008030	Shc2	K17447	NA	SHC adaptor protein 2 [Source:RGD Symbol;Acc:1307137]	1.08558	1.2228	0.495709	1.31078	2.86654	1.98796	0.45482	-1.13663	down
ko05214	Glioma	0.194214	ENSRNOG00000018461	Pdgfrb	NA	NA	platelet derived growth factor receptor beta [Source:RGD Symbol;Acc:3285]	29.9477	33.1625	27.8463	12.2108	11.6934	13.6546	2.42171	1.27603	up
ko05214	Glioma	0.194214	ENSRNOG00000018712	Camk2a	K04515	EC:2.7.11.17	calcium/calmodulin-dependent protein kinase II alpha [Source:RGD Symbol;Acc:2261]	0.637376	1.01802	0.591485	1.83401	1.77662	1.39807	0.448596	-1.15651	down
ko05214	Glioma	0.194214	ENSRNOG00000051964	LOC108348190	K04357	NA	uncharacterized LOC108348190 [Source:RGD Symbol;Acc:11520363]	0.212498	0.315292	0.147029	0.358931	0.514377	0.568232	0.468124	-1.09504	down
ko05214	Glioma	0.194214	ENSRNOG00000051986	Plcg2	NA	NA	phospholipase C, gamma 2 [Source:RGD Symbol;Acc:3348]	5.19104	6.76231	4.63746	12.3585	15.9316	15.9714	0.374836	-1.41567	down
ko05214	Glioma	0.194214	ENSRNOG00000054371	Prkcg	K19663	EC:2.7.11.13	protein kinase C, gamma [Source:RGD Symbol;Acc:3397]	1.53377	1.93347	1.8286	3.48216	4.70262	3.15826	0.46688	-1.09888	down
ko05214	Glioma	0.194214	ENSRNOG00000059837	Cdkn2a	K06621	NA	cyclin-dependent kinase inhibitor 2A [Source:RGD Symbol;Acc:2323]	1.75201	2.25335	0.861979	0.590342	0.229968	0.204869	4.7478	2.24726	up
ko00983	Drug metabolism - other enzymes	0.194214	ENSRNOG00000003917	Uck2	K00876	EC:2.7.1.48	uridine-cytidine kinase 2 [Source:RGD Symbol;Acc:620742]	8.01574	6.88645	9.99632	3.81717	3.70635	4.83458	2.01475	1.0106	up
ko00983	Drug metabolism - other enzymes	0.194214	ENSRNOG00000008310	Mpo	K10789	EC:1.11.2.2	myeloperoxidase [Source:RGD Symbol;Acc:1592081]	0.0178849	0	0.0336242	0.108739	0.193909	0.202207	0.102027	-3.29297	down
ko00983	Drug metabolism - other enzymes	0.194214	ENSRNOG00000012458	Cyp2e1	K07415	EC:1.14.13.-	cytochrome P450, family 2, subfamily e, polypeptide 1 [Source:RGD Symbol;Acc:2475]	1.59029	2.0422	0.503894	11.7452	14.7012	19.1101	0.090797	-3.46121	down
ko00983	Drug metabolism - other enzymes	0.194214	ENSRNOG00000015438	LOC501233	K01044	EC:3.1.1.1	LRRGT00080 [Source:RGD Symbol;Acc:1564453]	0.255036	0.28585	0.192836	0.493039	0.39678	0.839221	0.424353	-1.23666	down
ko00983	Drug metabolism - other enzymes	0.194214	ENSRNOG00000015519	Ces1d	K01044	EC:3.1.1.1	carboxylesterase 1D [Source:RGD Symbol;Acc:70896]	105.511	115.732	85.6374	288.457	310.235	308.355	0.338329	-1.5635	down
ko00983	Drug metabolism - other enzymes	0.194214	ENSRNOG00000019017	Gstm6	K00799	EC:2.5.1.18	glutathione S-transferase, mu 6 [Source:RGD Symbol;Acc:1563391]	0.072552	0.084308	0.123574	0.465283	0.252652	0.528694	0.224954	-2.1523	down
ko00983	Drug metabolism - other enzymes	0.194214	ENSRNOG00000047314	Tk1	K00857	EC:2.7.1.21	thymidine kinase 1 [Source:RGD Symbol;Acc:621014]	11.4544	10.6502	13.4442	3.07748	4.07286	3.38589	3.37396	1.75444	up
ko00983	Drug metabolism - other enzymes	0.194214	ENSRNOG00000049743	Gstm5	K00799	EC:2.5.1.18	glutathione S-transferase, mu 5 [Source:RGD Symbol;Acc:61964]	14.3618	10.7391	15.0375	7.82087	6.10415	5.18534	2.10035	1.07063	up
ko00983	Drug metabolism - other enzymes	0.194214	ENSRNOG00000054286	Rrm2	K10808	EC:1.17.4.1	ribonucleotide reductase regulatory subunit M2 [Source:RGD Symbol;Acc:1598310]	8.16388	9.93891	11.9198	2.25539	2.08556	3.09141	4.03944	2.01416	up
ko04270	Vascular smooth muscle contraction	0.196643	ENSRNOG00000004400	Avpr1a	K04226	NA	arginine vasopressin receptor 1A [Source:RGD Symbol;Acc:2185]	0.884247	0.991065	0.583946	2.30329	2.28827	2.50882	0.346356	-1.52967	down
ko04270	Vascular smooth muscle contraction	0.196643	ENSRNOG00000009440	Gucy1b2	K12319	EC:4.6.1.2	guanylate cyclase 1 soluble subunit beta 2 [Source:RGD Symbol;Acc:2770]	0.0654379	0.0684079	0.0307582	0	0	0	548.68	9.09982	up
ko04270	Vascular smooth muscle contraction	0.196643	ENSRNOG00000009522	Adra1a	NA	NA	adrenoceptor alpha 1A [Source:RGD Symbol;Acc:2055]	0.443506	0.522418	0.301567	0.884054	1.07486	0.934857	0.438007	-1.19097	down
ko04270	Vascular smooth muscle contraction	0.196643	ENSRNOG00000009597	Cyp4a1	K07425	EC:1.14.14.80	cytochrome P450, family 4, subfamily a, polypeptide 1 [Source:RGD Symbol;Acc:68945]	0.15917	0.263654	0.0812323	0.543618	0.850142	0.365403	0.286531	-1.80323	down
ko04270	Vascular smooth muscle contraction	0.196643	ENSRNOG00000010094	Kcnmb2	K04938	NA	potassium calcium-activated channel subfamily M regulatory beta subunit 2 [Source:RGD Symbol;Acc:631398]	1.40528	2.08716	1.42193	5.02584	6.16009	4.12691	0.320931	-1.63967	down
ko04270	Vascular smooth muscle contraction	0.196643	ENSRNOG00000011074	Calcb	K12332	NA	calcitonin-related polypeptide, beta [Source:RGD Symbol;Acc:620997]	1.83807	1.04867	0.913895	0.138678	0	0.047576	20.4057	4.3509	up
ko04270	Vascular smooth muscle contraction	0.196643	ENSRNOG00000011130	Calca	K12332	NA	calcitonin-related polypeptide alpha [Source:RGD Symbol;Acc:2254]	0.0864105	0.283044	0.149482	0.762545	1.17682	1.38808	0.155957	-2.68078	down
ko04270	Vascular smooth muscle contraction	0.196643	ENSRNOG00000015603	Prkce	NA	NA	protein kinase C, epsilon [Source:RGD Symbol;Acc:61925]	7.93806	8.81436	6.50926	11.1812	15.7408	20.6574	0.488903	-1.03238	down
ko04270	Vascular smooth muscle contraction	0.196643	ENSRNOG00000016945	Pla2g2a	NA	NA	phospholipase A2 group IIA [Source:RGD Symbol;Acc:620857]	430.776	142.041	305.208	62.6552	8.5295	13.1795	10.4076	3.37956	up
ko04270	Vascular smooth muscle contraction	0.196643	ENSRNOG00000020246	Myl9	K12755	NA	myosin light chain 9 [Source:RGD Symbol;Acc:1311235]	135.556	142.75	155.595	45.8177	50.7849	52.6763	2.90665	1.53936	up
ko04270	Vascular smooth muscle contraction	0.196643	ENSRNOG00000029401	Actg2	K12315	NA	actin gamma 2, smooth muscle [Source:RGD Symbol;Acc:2027]	102.861	107.03	135.114	14.5721	22.2641	25.1412	5.56662	2.4768	up
ko04270	Vascular smooth muscle contraction	0.196643	ENSRNOG00000033119	Plcb4	K05858	EC:3.1.4.11	phospholipase C, beta 4 [Source:RGD Symbol;Acc:3345]	7.14989	7.94063	6.17429	13.1434	15.847	14.3553	0.490587	-1.02742	down
ko04270	Vascular smooth muscle contraction	0.196643	ENSRNOG00000054371	Prkcg	K19663	EC:2.7.11.13	protein kinase C, gamma [Source:RGD Symbol;Acc:3397]	1.53377	1.93347	1.8286	3.48216	4.70262	3.15826	0.46688	-1.09888	down
ko04270	Vascular smooth muscle contraction	0.196643	ENSRNOG00000058039	Acta2	K12313	NA	actin alpha 2, smooth muscle [Source:RGD Symbol;Acc:621676]	251.371	255.477	327.807	74.1844	84.8511	106.259	3.14615	1.65359	up
ko04270	Vascular smooth muscle contraction	0.196643	ENSRNOG00000059479	Adcy1	K08041	EC:4.6.1.1	adenylate cyclase 1 [Source:RGD Symbol;Acc:1309318]	0.206208	0.356452	0.124273	1.28217	1.19576	1.45355	0.174726	-2.51683	down
ko00670	One carbon pool by folate	0.209513	ENSRNOG00000001261	Ftcd	K13990	4.3.1.4;EC:2.1.2.5	formimidoyltransferase cyclodeaminase [Source:RGD Symbol;Acc:70915]	0.650274	0.636468	0.569455	0.190145	0.244383	0.365488	2.3202	1.21425	up
ko00670	One carbon pool by folate	0.209513	ENSRNOG00000008586	Aldh1l2	K00289	EC:1.5.1.6	aldehyde dehydrogenase 1 family, member L2 [Source:RGD Symbol;Acc:1309458]	1.58045	0.639397	1.11351	0	0.019518	0.05896	42.4751	5.40855	up
ko00670	One carbon pool by folate	0.209513	ENSRNOG00000013521	Dhfr	K00287	EC:1.5.1.3	dihydrofolate reductase [Source:RGD Symbol;Acc:2500]	4.22122	4.13326	5.03549	1.95547	2.08985	2.19484	2.14577	1.1015	up
ko00270	Cysteine and methionine metabolism	0.218492	ENSRNOG00000000158	Cdo1	K00456	EC:1.13.11.20	cysteine dioxygenase type 1 [Source:RGD Symbol;Acc:69262]	13.6117	16.2309	8.62663	70.0537	77.1729	66.257	0.180198	-2.47235	down
ko00270	Cysteine and methionine metabolism	0.218492	ENSRNOG00000010658	LOC103691744	K01758	EC:4.4.1.1	cystathionine gamma-lyase [Source:RGD Symbol;Acc:2443]	1.72844	1.6746	1.53199	4.58381	5.24453	6.34443	0.305145	-1.71244	down
ko00270	Cysteine and methionine metabolism	0.218492	ENSRNOG00000011078	LOC100912604	K00797	EC:2.5.1.16	spermidine synthase [Source:RGD Symbol;Acc:620796]	13.1947	15.2032	20.325	6.87921	2.95351	7.02155	2.89083	1.53149	up
ko00270	Cysteine and methionine metabolism	0.218492	ENSRNOG00000015514	Bcat1	NA	NA	branched chain amino acid transaminase 1 [Source:RGD Symbol;Acc:2195]	12.5295	6.97787	11.6416	3.25827	4.57393	2.91629	2.89799	1.53505	up
ko00270	Cysteine and methionine metabolism	0.218492	ENSRNOG00000043116	RGD1308564	K03334	EC:1.4.3.2	similar to L-amino acid oxidase 1 [Source:RGD Symbol;Acc:1308564]	0.026424	0	0	0.340514	0.096658	0.17216	0.0433655	-4.52731	down
ko00270	Cysteine and methionine metabolism	0.218492	ENSRNOG00000057089	LOC103691744	K01758	EC:4.4.1.1	cystathionine gamma-lyase [Source:RGD Symbol;Acc:9153842]	0.806858	0.739301	0.690909	1.97614	2.33543	1.63968	0.375898	-1.41159	down
ko00750	Vitamin B6 metabolism	0.219734	ENSRNOG00000015354	Aox1	K00157	EC:1.2.3.1	aldehyde oxidase 1 [Source:RGD Symbol;Acc:620528]	3.60537	5.38913	2.23097	11.3222	11.3536	11.3529	0.329883	-1.59998	down
ko00750	Vitamin B6 metabolism	0.219734	ENSRNOG00000062125	Aox3	K00157	EC:1.2.3.1	aldehyde oxidase 3 [Source:RGD Symbol;Acc:1359328]	0.87407	1.02473	0.56828	2.35684	2.41775	3.05158	0.315235	-1.6655	down
ko04928	Parathyroid hormone synthesis, secretion and action	0.226123	ENSRNOG00000000521	Cdkn1a	K06625	NA	cyclin-dependent kinase inhibitor 1A [Source:RGD Symbol;Acc:69328]	60.966	98.6015	55.2437	36.6148	37.2161	27.4646	2.12064	1.0845	up
ko04928	Parathyroid hormone synthesis, secretion and action	0.226123	ENSRNOG00000001092	Kl	K14756	EC:3.2.1.31	Klotho [Source:RGD Symbol;Acc:620396]	2.60662	5.62618	3.57293	8.08057	8.68837	10.3107	0.435964	-1.19772	down
ko04928	Parathyroid hormone synthesis, secretion and action	0.226123	ENSRNOG00000010451	Slc34a3	K14683	NA	solute carrier family 34 member 3 [Source:RGD Symbol;Acc:708551]	1.00149	1.46258	0.41017	1.4268	3.30017	2.4283	0.401696	-1.31582	down
ko04928	Parathyroid hormone synthesis, secretion and action	0.226123	ENSRNOG00000010947	Mmp14	K07763	EC:3.4.24.80	matrix metallopeptidase 14 [Source:RGD Symbol;Acc:620198]	73.5681	51.0079	51.6732	22.5951	16.4562	16.8319	3.15389	1.65713	up
ko04928	Parathyroid hormone synthesis, secretion and action	0.226123	ENSRNOG00000016037	Mafb	K09036	NA	MAF bZIP transcription factor B [Source:RGD Symbol;Acc:2982]	5.65119	5.0509	3.97886	1.29404	2.17132	1.43715	2.99458	1.58235	up
ko04928	Parathyroid hormone synthesis, secretion and action	0.226123	ENSRNOG00000019518	Pde4c	K13293	EC:3.1.4.53	phosphodiesterase 4C [Source:RGD Symbol;Acc:727918]	3.44955	3.5173	4.16828	12.8874	12.1926	12.824	0.293772	-1.76723	down
ko04928	Parathyroid hormone synthesis, secretion and action	0.226123	ENSRNOG00000020948	Pth1r	K04585	NA	parathyroid hormone 1 receptor [Source:RGD Symbol;Acc:3442]	8.63491	9.04509	5.00246	3.75007	3.62401	3.48961	2.08792	1.06206	up
ko04928	Parathyroid hormone synthesis, secretion and action	0.226123	ENSRNOG00000023643	Mmp17	K07997	EC:3.4.24.-	matrix metallopeptidase 17 [Source:RGD Symbol;Acc:1311541]	4.44504	5.58279	4.56778	1.30238	1.1677	2.24148	3.09783	1.63126	up
ko04928	Parathyroid hormone synthesis, secretion and action	0.226123	ENSRNOG00000033119	Plcb4	K05858	EC:3.1.4.11	phospholipase C, beta 4 [Source:RGD Symbol;Acc:3345]	7.14989	7.94063	6.17429	13.1434	15.847	14.3553	0.490587	-1.02742	down
ko04928	Parathyroid hormone synthesis, secretion and action	0.226123	ENSRNOG00000052205	Fgf23	K22428	NA	fibroblast growth factor 23 [Source:RGD Symbol;Acc:620178]	0.318321	0.976255	0.694014	0	0	0	6628.63	12.6945	up
ko04928	Parathyroid hormone synthesis, secretion and action	0.226123	ENSRNOG00000054371	Prkcg	K19663	EC:2.7.11.13	protein kinase C, gamma [Source:RGD Symbol;Acc:3397]	1.53377	1.93347	1.8286	3.48216	4.70262	3.15826	0.46688	-1.09888	down
ko04928	Parathyroid hormone synthesis, secretion and action	0.226123	ENSRNOG00000059479	Adcy1	K08041	EC:4.6.1.1	adenylate cyclase 1 [Source:RGD Symbol;Acc:1309318]	0.206208	0.356452	0.124273	1.28217	1.19576	1.45355	0.174726	-2.51683	down
ko04750	Inflammatory mediator regulation of TRP channels	0.245648	ENSRNOG00000004488	Bdkrb1	K03915	NA	bradykinin receptor B1 [Source:RGD Symbol;Acc:620401]	0.213898	0.179507	1.7444	0	0.153112	0.038042	11.1837	3.48332	up
ko04750	Inflammatory mediator regulation of TRP channels	0.245648	ENSRNOG00000009597	Cyp4a1	K07425	EC:1.14.14.80	cytochrome P450, family 4, subfamily a, polypeptide 1 [Source:RGD Symbol;Acc:68945]	0.15917	0.263654	0.0812323	0.543618	0.850142	0.365403	0.286531	-1.80323	down
ko04750	Inflammatory mediator regulation of TRP channels	0.245648	ENSRNOG00000013953	Ntrk1	K03176	EC:2.7.10.1	neurotrophic receptor tyrosine kinase 1 [Source:RGD Symbol;Acc:620144]	0.089799	0.0959429	0.0319835	0.269543	0.411822	0.210092	0.244236	-2.03366	down
ko04750	Inflammatory mediator regulation of TRP channels	0.245648	ENSRNOG00000015603	Prkce	NA	NA	protein kinase C, epsilon [Source:RGD Symbol;Acc:61925]	7.93806	8.81436	6.50926	11.1812	15.7408	20.6574	0.488903	-1.03238	down
ko04750	Inflammatory mediator regulation of TRP channels	0.245648	ENSRNOG00000016571	Ngf	K02582	NA	nerve growth factor [Source:RGD Symbol;Acc:1598328]	0.683532	0.348949	0.591755	0.156563	0.22621	0.0462036	3.78631	1.92079	up
ko04750	Inflammatory mediator regulation of TRP channels	0.245648	ENSRNOG00000018712	Camk2a	K04515	EC:2.7.11.17	calcium/calmodulin-dependent protein kinase II alpha [Source:RGD Symbol;Acc:2261]	0.637376	1.01802	0.591485	1.83401	1.77662	1.39807	0.448596	-1.15651	down
ko04750	Inflammatory mediator regulation of TRP channels	0.245648	ENSRNOG00000019606	Trpv3	K04972	NA	transient receptor potential cation channel, subfamily V, member 3 [Source:RGD Symbol;Acc:1564531]	0.18442	0.282586	0.1821	0.341037	0.761587	0.430847	0.423292	-1.24027	down
ko04750	Inflammatory mediator regulation of TRP channels	0.245648	ENSRNOG00000030387	Kng1	K03898	NA	kininogen 1 [Source:RGD Symbol;Acc:1359376]	21.2306	13.4328	16.0391	1.66566	2.34674	4.32674	6.08007	2.60409	up
ko04750	Inflammatory mediator regulation of TRP channels	0.245648	ENSRNOG00000033119	Plcb4	K05858	EC:3.1.4.11	phospholipase C, beta 4 [Source:RGD Symbol;Acc:3345]	7.14989	7.94063	6.17429	13.1434	15.847	14.3553	0.490587	-1.02742	down
ko04750	Inflammatory mediator regulation of TRP channels	0.245648	ENSRNOG00000051986	Plcg2	NA	NA	phospholipase C, gamma 2 [Source:RGD Symbol;Acc:3348]	5.19104	6.76231	4.63746	12.3585	15.9316	15.9714	0.374836	-1.41567	down
ko04750	Inflammatory mediator regulation of TRP channels	0.245648	ENSRNOG00000054371	Prkcg	K19663	EC:2.7.11.13	protein kinase C, gamma [Source:RGD Symbol;Acc:3397]	1.53377	1.93347	1.8286	3.48216	4.70262	3.15826	0.46688	-1.09888	down
ko04750	Inflammatory mediator regulation of TRP channels	0.245648	ENSRNOG00000059479	Adcy1	K08041	EC:4.6.1.1	adenylate cyclase 1 [Source:RGD Symbol;Acc:1309318]	0.206208	0.356452	0.124273	1.28217	1.19576	1.45355	0.174726	-2.51683	down
ko05205	Proteoglycans in cancer	0.249191	ENSRNOG00000000521	Cdkn1a	K06625	NA	cyclin-dependent kinase inhibitor 1A [Source:RGD Symbol;Acc:69328]	60.966	98.6015	55.2437	36.6148	37.2161	27.4646	2.12064	1.0845	up
ko05205	Proteoglycans in cancer	0.249191	ENSRNOG00000002418	Tgfb2	K13376	NA	transforming growth factor, beta 2 [Source:RGD Symbol;Acc:70491]	32.2616	34.4352	34.8496	12.3645	10.9716	12.4504	2.83756	1.50465	up
ko05205	Proteoglycans in cancer	0.249191	ENSRNOG00000002978	Faslg	K04389	NA	Fas ligand [Source:RGD Symbol;Acc:3880]	0.816894	1.01133	0.807977	3.43662	5.79528	3.71874	0.203558	-2.29649	down
ko05205	Proteoglycans in cancer	0.249191	ENSRNOG00000004610	Lum	K08122	NA	lumican [Source:RGD Symbol;Acc:620984]	35.0811	13.503	14.0309	4.19002	2.93747	2.81793	6.29586	2.6544	up
ko05205	Proteoglycans in cancer	0.249191	ENSRNOG00000011101	Twist1	K09069	NA	twist family bHLH transcription factor 1 [Source:RGD Symbol;Acc:621455]	1.03012	0.349704	0.991779	0.263596	0.053101	0.358037	3.51487	1.81347	up
ko05205	Proteoglycans in cancer	0.249191	ENSRNOG00000014248	Erbb4	K05085	EC:2.7.10.1	erb-b2 receptor tyrosine kinase 4 [Source:RGD Symbol;Acc:620486]	0.102964	0.118757	0.047957	0.602772	0.820792	0.860173	0.118086	-3.08209	down
ko05205	Proteoglycans in cancer	0.249191	ENSRNOG00000014288	Fn1	K05717	NA	fibronectin 1 [Source:RGD Symbol;Acc:2624]	280.945	248.379	229.735	57.4707	64.5711	77.3481	3.80691	1.92862	up
ko05205	Proteoglycans in cancer	0.249191	ENSRNOG00000014385	Wnt2b	K00182	NA	Wnt family member 2B [Source:RGD Symbol;Acc:69346]	1.93844	1.91525	1.50408	7.62981	5.39889	3.48382	0.324467	-1.62386	down
ko05205	Proteoglycans in cancer	0.249191	ENSRNOG00000015618	Wnt5a	K00444	NA	Wnt family member 5A [Source:RGD Symbol;Acc:69250]	7.40085	6.90616	6.99221	3.0348	2.5955	2.2052	2.7183	1.4427	up
ko05205	Proteoglycans in cancer	0.249191	ENSRNOG00000015750	Wnt7b	K00572	NA	Wnt family member 7B [Source:RGD Symbol;Acc:1311441]	1.76975	1.41713	2.20033	0.207026	0.670733	0.684039	3.44937	1.78633	up
ko05205	Proteoglycans in cancer	0.249191	ENSRNOG00000016695	Mmp2	K01398	EC:3.4.24.24	matrix metallopeptidase 2 [Source:RGD Symbol;Acc:621316]	112.629	84.3299	76.9475	30.7938	26.2646	32.2348	3.06749	1.61706	up
ko05205	Proteoglycans in cancer	0.249191	ENSRNOG00000017539	Mmp9	K01403	EC:3.4.24.35	matrix metallopeptidase 9 [Source:RGD Symbol;Acc:621320]	0.708985	0.326444	0.167858	0.688657	1.06294	1.59762	0.359274	-1.47684	down
ko05205	Proteoglycans in cancer	0.249191	ENSRNOG00000018059	Ihh	K11989	NA	Indian hedgehog signaling molecule [Source:RGD Symbol;Acc:620021]	0.149505	0.246864	0.042178	0.508533	0.832047	0.848627	0.200322	-2.31961	down
ko05205	Proteoglycans in cancer	0.249191	ENSRNOG00000018712	Camk2a	K04515	EC:2.7.11.17	calcium/calmodulin-dependent protein kinase II alpha [Source:RGD Symbol;Acc:2261]	0.637376	1.01802	0.591485	1.83401	1.77662	1.39807	0.448596	-1.15651	down
ko05205	Proteoglycans in cancer	0.249191	ENSRNOG00000021569	Tiam1	K05731	NA	T-cell lymphoma invasion and metastasis 1 [Source:RGD Symbol;Acc:1307455]	2.12158	2.24547	1.49218	0.584266	1.21954	1.06253	2.04415	1.0315	up
ko05205	Proteoglycans in cancer	0.249191	ENSRNOG00000022784	Fzd10	K02842	NA	frizzled class receptor 10 [Source:RGD Symbol;Acc:1583825]	0.099555	0.232361	0.089789	0.016885	0.017521	0.023113	7.33158	2.87412	up
ko05205	Proteoglycans in cancer	0.249191	ENSRNOG00000037931	Plaur	K03985	NA	plasminogen activator, urokinase receptor [Source:RGD Symbol;Acc:620597]	21.8316	21.8635	26.0506	10.3191	10.6142	8.67513	2.3556	1.2361	up
ko05205	Proteoglycans in cancer	0.249191	ENSRNOG00000045829	Thbs1	K16857	NA	thrombospondin 1 [Source:RGD Symbol;Acc:1588455]	69.4641	106.372	164.303	19.9347	19.858	26.7682	5.11019	2.35338	up
ko05205	Proteoglycans in cancer	0.249191	ENSRNOG00000051986	Plcg2	NA	NA	phospholipase C, gamma 2 [Source:RGD Symbol;Acc:3348]	5.19104	6.76231	4.63746	12.3585	15.9316	15.9714	0.374836	-1.41567	down
ko05205	Proteoglycans in cancer	0.249191	ENSRNOG00000054371	Prkcg	K19663	EC:2.7.11.13	protein kinase C, gamma [Source:RGD Symbol;Acc:3397]	1.53377	1.93347	1.8286	3.48216	4.70262	3.15826	0.46688	-1.09888	down
ko05205	Proteoglycans in cancer	0.249191	ENSRNOG00000058111	Itga2	K06481	NA	integrin subunit alpha 2 [Source:RGD Symbol;Acc:621632]	2.02287	2.41017	1.73864	0.541871	0.886078	0.645843	2.97604	1.57339	up
ko04940	Type I diabetes mellitus	0.264683	ENSRNOG00000000562	Prf1	K07818	NA	perforin 1 [Source:RGD Symbol;Acc:708463]	8.20777	9.31399	3.00773	32.4085	55.6601	39.4225	0.161027	-2.63463	down
ko04940	Type I diabetes mellitus	0.264683	ENSRNOG00000002978	Faslg	K04389	NA	Fas ligand [Source:RGD Symbol;Acc:3880]	0.816894	1.01133	0.807977	3.43662	5.79528	3.71874	0.203558	-2.29649	down
ko04940	Type I diabetes mellitus	0.264683	ENSRNOG00000007468	Ifng	K04687	NA	interferon gamma [Source:RGD Symbol;Acc:2866]	0	0	0	0.111509	0.315579	0.259981	0.000436637	-11.1613	down
ko04940	Type I diabetes mellitus	0.264683	ENSRNOG00000019587	Ptprn	K07817	EC:3.1.3.48	protein tyrosine phosphatase, receptor type, N [Source:RGD Symbol;Acc:620777]	3.28822	1.58827	3.5683	0.133251	0.169668	0.090297	21.4762	4.42467	up
ko04940	Type I diabetes mellitus	0.264683	ENSRNOG00000045973	Gzmb	K01353	EC:3.4.21.79	granzyme B [Source:RGD Symbol;Acc:620018]	1.2569	2.48146	1.0418	7.67971	19.0044	10.3411	0.129105	-2.95338	down
ko04940	Type I diabetes mellitus	0.264683	ENSRNOG00000047864	LOC108348072	K06752	NA	RT1 class II, locus DMa [Source:RGD Symbol;Acc:735053]	18.1206	19.1445	16.0483	10.0005	6.31184	7.37897	2.25034	1.17014	up
ko04940	Type I diabetes mellitus	0.264683	ENSRNOG00000049976	Gzmbl2	K01353	EC:3.4.21.79	Granzyme B-like 2 [Source:RGD Symbol;Acc:2320097]	2.02426	2.40992	1.11774	7.66841	9.94887	9.79654	0.202523	-2.30384	down
ko00410	beta-Alanine metabolism	0.272119	ENSRNOG00000002331	Aldh3a1	K00129	EC:1.2.1.5	aldehyde dehydrogenase 3 family, member A1 [Source:RGD Symbol;Acc:2088]	0.906245	1.33741	0.734843	3.9607	3.15494	3.58458	0.278359	-1.84498	down
ko00410	beta-Alanine metabolism	0.272119	ENSRNOG00000002636	Abat	K13524	2.6.1.22;EC:2.6.1.19	4-aminobutyrate aminotransferase [Source:RGD Symbol;Acc:620948]	0.050641	0.092212	0.036326	0.388185	0.10771	0.25824	0.237595	-2.07342	down
ko00410	beta-Alanine metabolism	0.272119	ENSRNOG00000011078	LOC100912604	K00797	EC:2.5.1.16	spermidine synthase [Source:RGD Symbol;Acc:620796]	13.1947	15.2032	20.325	6.87921	2.95351	7.02155	2.89083	1.53149	up
ko00410	beta-Alanine metabolism	0.272119	ENSRNOG00000011497	Aldh1b1	K00128	EC:1.2.1.3	aldehyde dehydrogenase 1 family, member B1 [Source:RGD Symbol;Acc:1306737]	0.047646	0.082567	0.020813	0	0	0	503.42	8.97562	up
ko05133	Pertussis	0.27723	ENSRNOG00000004062	C4bpa	K04002	NA	complement component 4 binding protein, alpha [Source:RGD Symbol;Acc:2235]	58.5906	39.8521	68.5658	25.9576	24.1979	21.7374	2.32302	1.216	up
ko05133	Pertussis	0.27723	ENSRNOG00000010278	Il6	K05405	NA	interleukin 6 [Source:RGD Symbol;Acc:2901]	3.16485	2.11915	11.0231	0.116354	0.115796	0.224046	35.7458	5.1597	up
ko05133	Pertussis	0.27723	ENSRNOG00000011796	C1r	K01330	EC:3.4.21.41	complement C1r [Source:RGD Symbol;Acc:1309091]	123.094	95.9083	133.697	50.3805	41.8088	43.88	2.59206	1.3741	up
ko05133	Pertussis	0.27723	ENSRNOG00000011971	C1s	K01331	EC:3.4.21.42	complement C1s [Source:RGD Symbol;Acc:619983]	123.565	79.6933	122.779	33.0371	24.7081	21.0409	4.13826	2.04903	up
ko05133	Pertussis	0.27723	ENSRNOG00000012749	C1qb	NA	NA	complement C1q B chain [Source:RGD Symbol;Acc:2229]	68.8056	59.044	60.4535	22.5219	17.5828	21.0046	3.08141	1.62359	up
ko05133	Pertussis	0.27723	ENSRNOG00000012804	C1qc	K03988	NA	complement C1q C chain [Source:RGD Symbol;Acc:1306828]	74.9961	68.9488	69.0432	27.4504	22.6791	29.6529	2.66961	1.41663	up
ko05133	Pertussis	0.27723	ENSRNOG00000012807	C1qa	K03986	NA	complement C1q A chain [Source:RGD Symbol;Acc:1306716]	101.115	87.5529	87.2321	25.1176	20.886	29.14	3.67164	1.87642	up
ko05133	Pertussis	0.27723	ENSRNOG00000047657	C4a	K03989	NA	complement C4A [Source:RGD Symbol;Acc:620005]	237.873	241.958	309.397	129.43	75.4955	80.8113	2.76208	1.46576	up
ko04918	Thyroid hormone synthesis	0.27723	ENSRNOG00000007290	Atp1a2	K01539	EC:7.2.2.13	ATPase Na+/K+ transporting subunit alpha 2 [Source:RGD Symbol;Acc:2168]	1.11361	2.2107	0.439613	6.71531	7.20043	7.69308	0.174185	-2.52131	down
ko04918	Thyroid hormone synthesis	0.27723	ENSRNOG00000009751	Gpx7	K00432	EC:1.11.1.9	glutathione peroxidase 7 [Source:RGD Symbol;Acc:1306999]	34.5535	30.8793	25.9259	12.6551	10.1213	16.1797	2.34517	1.22969	up
ko04918	Thyroid hormone synthesis	0.27723	ENSRNOG00000010461	Gpx8	K00432	EC:1.11.1.9	glutathione peroxidase 8 [Source:RGD Symbol;Acc:1307506]	21.4849	17.7639	19.6333	10.0044	7.93017	11.1224	2.02644	1.01895	up
ko04918	Thyroid hormone synthesis	0.27723	ENSRNOG00000030726	Asgr2	K10064	NA	asialoglycoprotein receptor 2 [Source:RGD Symbol;Acc:2161]	2.34361	1.80753	2.56313	1.11066	0.695973	0.645904	2.73769	1.45296	up
ko04918	Thyroid hormone synthesis	0.27723	ENSRNOG00000033119	Plcb4	K05858	EC:3.1.4.11	phospholipase C, beta 4 [Source:RGD Symbol;Acc:3345]	7.14989	7.94063	6.17429	13.1434	15.847	14.3553	0.490587	-1.02742	down
ko04918	Thyroid hormone synthesis	0.27723	ENSRNOG00000054371	Prkcg	K19663	EC:2.7.11.13	protein kinase C, gamma [Source:RGD Symbol;Acc:3397]	1.53377	1.93347	1.8286	3.48216	4.70262	3.15826	0.46688	-1.09888	down
ko04918	Thyroid hormone synthesis	0.27723	ENSRNOG00000058692	Slc26a4	NA	NA	solute carrier family 26 member 4 [Source:RGD Symbol;Acc:3293]	32.2035	26.0783	43.1394	2.67212	1.9953	1.15691	17.4134	4.12212	up
ko04918	Thyroid hormone synthesis	0.27723	ENSRNOG00000059479	Adcy1	K08041	EC:4.6.1.1	adenylate cyclase 1 [Source:RGD Symbol;Acc:1309318]	0.206208	0.356452	0.124273	1.28217	1.19576	1.45355	0.174726	-2.51683	down
ko00330	Arginine and proline metabolism	0.279256	ENSRNOG00000008575	Aoc1	K11182	EC:1.4.3.22	amine oxidase, copper containing 1 [Source:RGD Symbol;Acc:61296]	57.7855	33.0252	59.3831	5.04208	2.6436	3.20957	13.7852	3.78505	up
ko00330	Arginine and proline metabolism	0.279256	ENSRNOG00000011078	LOC100912604	K00797	EC:2.5.1.16	spermidine synthase [Source:RGD Symbol;Acc:620796]	13.1947	15.2032	20.325	6.87921	2.95351	7.02155	2.89083	1.53149	up
ko00330	Arginine and proline metabolism	0.279256	ENSRNOG00000011497	Aldh1b1	K00128	EC:1.2.1.3	aldehyde dehydrogenase 1 family, member B1 [Source:RGD Symbol;Acc:1306737]	0.047646	0.082567	0.020813	0	0	0	503.42	8.97562	up
ko00330	Arginine and proline metabolism	0.279256	ENSRNOG00000013304	Arg1	K01476	EC:3.5.3.1	arginase 1 [Source:RGD Symbol;Acc:2150]	38.2968	26.0177	49.9768	14.1945	11.7175	9.74681	3.20513	1.68038	up
ko00330	Arginine and proline metabolism	0.279256	ENSRNOG00000016837	Ckm	K00933	EC:2.7.3.2	creatine kinase, M-type [Source:RGD Symbol;Acc:2358]	0	0	0.031429	0.606921	0.069227	0.253695	0.0338003	-4.88682	down
ko00330	Arginine and proline metabolism	0.279256	ENSRNOG00000036682	Pycr1	K00286	EC:1.5.1.2	pyrroline-5-carboxylate reductase 1 [Source:RGD Symbol;Acc:1307863]	2.17926	1.01274	1.11716	0.278809	0.661332	0.485691	3.02221	1.5956	up
ko04659	Th17 cell differentiation	0.301935	ENSRNOG00000003298	Cd247	K06453	NA	Cd247 molecule [Source:RGD Symbol;Acc:2305]	3.27195	2.92367	1.71789	6.18881	10.0058	6.84293	0.343505	-1.5416	down
ko04659	Th17 cell differentiation	0.301935	ENSRNOG00000007468	Ifng	K04687	NA	interferon gamma [Source:RGD Symbol;Acc:2866]	0	0	0	0.111509	0.315579	0.259981	0.000436637	-11.1613	down
ko04659	Th17 cell differentiation	0.301935	ENSRNOG00000009427	Tbx21	K10166	NA	T-box 21 [Source:RGD Symbol;Acc:1308264]	2.73093	3.08446	0.760526	5.84379	17.6681	7.66245	0.21094	-2.24509	down
ko04659	Th17 cell differentiation	0.301935	ENSRNOG00000009705	Lck	K05856	EC:2.7.10.2	LCK proto-oncogene, Src family tyrosine kinase [Source:RGD Symbol;Acc:2994]	6.96253	7.70444	4.6759	11.8213	21.1914	13.3951	0.416803	-1.26256	down
ko04659	Th17 cell differentiation	0.301935	ENSRNOG00000010278	Il6	K05405	NA	interleukin 6 [Source:RGD Symbol;Acc:2901]	3.16485	2.11915	11.0231	0.116354	0.115796	0.224046	35.7458	5.1597	up
ko04659	Th17 cell differentiation	0.301935	ENSRNOG00000015994	Cd3d	K06450	NA	CD3d molecule [Source:RGD Symbol;Acc:2304]	2.36595	1.55482	1.11031	3.79028	4.24872	4.54988	0.399646	-1.32321	down
ko04659	Th17 cell differentiation	0.301935	ENSRNOG00000016995	Zap70	K07360	EC:2.7.10.2	zeta chain of T cell receptor associated protein kinase 70 [Source:RGD Symbol;Acc:3983]	1.91387	2.38414	1.62197	5.55549	9.51381	5.03816	0.294417	-1.76407	down
ko04659	Th17 cell differentiation	0.301935	ENSRNOG00000017429	Lat	K07362	NA	linker for activation of T cells [Source:RGD Symbol;Acc:620802]	7.77653	7.11948	5.88298	20.675	13.8754	9.08614	0.476183	-1.07041	down
ko04659	Th17 cell differentiation	0.301935	ENSRNOG00000019216	Il12rb1	K05063	NA	interleukin 12 receptor subunit beta 1 [Source:RGD Symbol;Acc:620025]	0.585973	0.344356	0.316211	1.4795	2.72557	0.888842	0.244712	-2.03084	down
ko04659	Th17 cell differentiation	0.301935	ENSRNOG00000047864	LOC108348072	K06752	NA	RT1 class II, locus DMa [Source:RGD Symbol;Acc:735053]	18.1206	19.1445	16.0483	10.0005	6.31184	7.37897	2.25034	1.17014	up
ko04659	Th17 cell differentiation	0.301935	ENSRNOG00000048636	Il2rb	K05069	NA	interleukin 2 receptor subunit beta [Source:RGD Symbol;Acc:2896]	6.32093	7.65754	3.20297	18.9429	37.4261	22.1126	0.218923	-2.1915	down
ko00290	Valine, leucine and isoleucine biosynthesis	0.30981	ENSRNOG00000015514	Bcat1	NA	NA	branched chain amino acid transaminase 1 [Source:RGD Symbol;Acc:2195]	12.5295	6.97787	11.6416	3.25827	4.57393	2.91629	2.89799	1.53505	up
ko00760	Nicotinate and nicotinamide metabolism	0.313196	ENSRNOG00000005930	Nnmt	K00541	EC:2.1.1.1	nicotinamide N-methyltransferase [Source:RGD Symbol;Acc:1309606]	6.89412	4.57489	6.11557	2.13375	2.24641	1.83756	2.82813	1.49985	up
ko00760	Nicotinate and nicotinamide metabolism	0.313196	ENSRNOG00000015354	Aox1	K00157	EC:1.2.3.1	aldehyde oxidase 1 [Source:RGD Symbol;Acc:620528]	3.60537	5.38913	2.23097	11.3222	11.3536	11.3529	0.329883	-1.59998	down
ko00760	Nicotinate and nicotinamide metabolism	0.313196	ENSRNOG00000019687	Art2b	K19980	3.2.2.5;EC:2.4.2.31	ADP-ribosyltransferase 2b [Source:RGD Symbol;Acc:3521]	0.389175	0.239343	0.19933	1.47019	1.39137	1.3115	0.198379	-2.33367	down
ko00760	Nicotinate and nicotinamide metabolism	0.313196	ENSRNOG00000062125	Aox3	K00157	EC:1.2.3.1	aldehyde oxidase 3 [Source:RGD Symbol;Acc:1359328]	0.87407	1.02473	0.56828	2.35684	2.41775	3.05158	0.315235	-1.6655	down
ko05217	Basal cell carcinoma	0.322306	ENSRNOG00000000521	Cdkn1a	K06625	NA	cyclin-dependent kinase inhibitor 1A [Source:RGD Symbol;Acc:69328]	60.966	98.6015	55.2437	36.6148	37.2161	27.4646	2.12064	1.0845	up
ko05217	Basal cell carcinoma	0.322306	ENSRNOG00000014385	Wnt2b	K00182	NA	Wnt family member 2B [Source:RGD Symbol;Acc:69346]	1.93844	1.91525	1.50408	7.62981	5.39889	3.48382	0.324467	-1.62386	down
ko05217	Basal cell carcinoma	0.322306	ENSRNOG00000015618	Wnt5a	K00444	NA	Wnt family member 5A [Source:RGD Symbol;Acc:69250]	7.40085	6.90616	6.99221	3.0348	2.5955	2.2052	2.7183	1.4427	up
ko05217	Basal cell carcinoma	0.322306	ENSRNOG00000015750	Wnt7b	K00572	NA	Wnt family member 7B [Source:RGD Symbol;Acc:1311441]	1.76975	1.41713	2.20033	0.207026	0.670733	0.684039	3.44937	1.78633	up
ko05217	Basal cell carcinoma	0.322306	ENSRNOG00000021276	Bmp2	NA	NA	bone morphogenetic protein 2 [Source:RGD Symbol;Acc:2211]	3.40519	7.43167	5.53057	2.54594	1.70193	2.53326	2.41367	1.27123	up
ko05217	Basal cell carcinoma	0.322306	ENSRNOG00000022784	Fzd10	K02842	NA	frizzled class receptor 10 [Source:RGD Symbol;Acc:1583825]	0.099555	0.232361	0.089789	0.016885	0.017521	0.023113	7.33158	2.87412	up
ko05217	Basal cell carcinoma	0.322306	ENSRNOG00000025120	Gli1	K16797	NA	GLI family zinc finger 1 [Source:RGD Symbol;Acc:621673]	3.22817	2.74387	2.02003	0.698325	0.477126	0.544131	4.64769	2.21651	up
ko05330	Allograft rejection	0.327071	ENSRNOG00000000562	Prf1	K07818	NA	perforin 1 [Source:RGD Symbol;Acc:708463]	8.20777	9.31399	3.00773	32.4085	55.6601	39.4225	0.161027	-2.63463	down
ko05330	Allograft rejection	0.327071	ENSRNOG00000002978	Faslg	K04389	NA	Fas ligand [Source:RGD Symbol;Acc:3880]	0.816894	1.01133	0.807977	3.43662	5.79528	3.71874	0.203558	-2.29649	down
ko05330	Allograft rejection	0.327071	ENSRNOG00000007468	Ifng	K04687	NA	interferon gamma [Source:RGD Symbol;Acc:2866]	0	0	0	0.111509	0.315579	0.259981	0.000436637	-11.1613	down
ko05330	Allograft rejection	0.327071	ENSRNOG00000045973	Gzmb	K01353	EC:3.4.21.79	granzyme B [Source:RGD Symbol;Acc:620018]	1.2569	2.48146	1.0418	7.67971	19.0044	10.3411	0.129105	-2.95338	down
ko05330	Allograft rejection	0.327071	ENSRNOG00000047864	LOC108348072	K06752	NA	RT1 class II, locus DMa [Source:RGD Symbol;Acc:735053]	18.1206	19.1445	16.0483	10.0005	6.31184	7.37897	2.25034	1.17014	up
ko05330	Allograft rejection	0.327071	ENSRNOG00000049976	Gzmbl2	K01353	EC:3.4.21.79	Granzyme B-like 2 [Source:RGD Symbol;Acc:2320097]	2.02426	2.40992	1.11774	7.66841	9.94887	9.79654	0.202523	-2.30384	down
ko04072	Phospholipase D signaling pathway	0.329503	ENSRNOG00000001796	Dgkg	K00901	EC:2.7.1.107	diacylglycerol kinase, gamma [Source:RGD Symbol;Acc:2499]	0.478014	0.657643	0.542705	1.34259	1.57348	2.23499	0.325828	-1.61782	down
ko04072	Phospholipase D signaling pathway	0.329503	ENSRNOG00000002244	Pdgfra	K04363	EC:2.7.10.1	platelet derived growth factor receptor alpha [Source:RGD Symbol;Acc:3284]	10.7913	10.4928	10.1398	22.5292	21.8926	24.1598	0.458196	-1.12596	down
ko04072	Phospholipase D signaling pathway	0.329503	ENSRNOG00000004400	Avpr1a	K04226	NA	arginine vasopressin receptor 1A [Source:RGD Symbol;Acc:2185]	0.884247	0.991065	0.583946	2.30329	2.28827	2.50882	0.346356	-1.52967	down
ko04072	Phospholipase D signaling pathway	0.329503	ENSRNOG00000005519	Grm3	K04605	NA	glutamate metabotropic receptor 3 [Source:RGD Symbol;Acc:2744]	1.19676	1.61378	0.921182	0.377273	0.291303	0.740839	2.64771	1.40475	up
ko04072	Phospholipase D signaling pathway	0.329503	ENSRNOG00000008030	Shc2	K17447	NA	SHC adaptor protein 2 [Source:RGD Symbol;Acc:1307137]	1.08558	1.2228	0.495709	1.31078	2.86654	1.98796	0.45482	-1.13663	down
ko04072	Phospholipase D signaling pathway	0.329503	ENSRNOG00000009177	Fcer1a	K08089	NA	Fc fragment of IgE receptor Ia [Source:RGD Symbol;Acc:2597]	11.7309	2.89785	1.78742	1.47421	0.54891	1.09037	5.27258	2.39851	up
ko04072	Phospholipase D signaling pathway	0.329503	ENSRNOG00000014269	Cxcr2	NA	NA	C-X-C motif chemokine receptor 2 [Source:RGD Symbol;Acc:2906]	2.28515	1.28783	1.53123	4.02702	2.16233	5.47115	0.437735	-1.19187	down
ko04072	Phospholipase D signaling pathway	0.329503	ENSRNOG00000014290	Grm1	K04603	NA	glutamate metabotropic receptor 1 [Source:RGD Symbol;Acc:2742]	0.009912	0	0.015688	0.069331	0.104979	0.0226431	0.12998	-2.94364	down
ko04072	Phospholipase D signaling pathway	0.329503	ENSRNOG00000015260	Lpar3	K04294	NA	lysophosphatidic acid receptor 3 [Source:RGD Symbol;Acc:620565]	4.46911	5.9081	4.11901	16.6929	15.1815	12.4222	0.327254	-1.61152	down
ko04072	Phospholipase D signaling pathway	0.329503	ENSRNOG00000018461	Pdgfrb	NA	NA	platelet derived growth factor receptor beta [Source:RGD Symbol;Acc:3285]	29.9477	33.1625	27.8463	12.2108	11.6934	13.6546	2.42171	1.27603	up
ko04072	Phospholipase D signaling pathway	0.329503	ENSRNOG00000020993	Ms4a2	K08090	NA	membrane spanning 4-domains A2 [Source:RGD Symbol;Acc:2598]	7.02676	2.45204	1.76553	1.26067	0.858921	0.875766	3.75392	1.9084	up
ko04072	Phospholipase D signaling pathway	0.329503	ENSRNOG00000033119	Plcb4	K05858	EC:3.1.4.11	phospholipase C, beta 4 [Source:RGD Symbol;Acc:3345]	7.14989	7.94063	6.17429	13.1434	15.847	14.3553	0.490587	-1.02742	down
ko04072	Phospholipase D signaling pathway	0.329503	ENSRNOG00000051964	LOC108348190	K04357	NA	uncharacterized LOC108348190 [Source:RGD Symbol;Acc:11520363]	0.212498	0.315292	0.147029	0.358931	0.514377	0.568232	0.468124	-1.09504	down
ko04072	Phospholipase D signaling pathway	0.329503	ENSRNOG00000051986	Plcg2	NA	NA	phospholipase C, gamma 2 [Source:RGD Symbol;Acc:3348]	5.19104	6.76231	4.63746	12.3585	15.9316	15.9714	0.374836	-1.41567	down
ko04072	Phospholipase D signaling pathway	0.329503	ENSRNOG00000059479	Adcy1	K08041	EC:4.6.1.1	adenylate cyclase 1 [Source:RGD Symbol;Acc:1309318]	0.206208	0.356452	0.124273	1.28217	1.19576	1.45355	0.174726	-2.51683	down
ko04015	Rap1 signaling pathway	0.340335	ENSRNOG00000002244	Pdgfra	K04363	EC:2.7.10.1	platelet derived growth factor receptor alpha [Source:RGD Symbol;Acc:3284]	10.7913	10.4928	10.1398	22.5292	21.8926	24.1598	0.458196	-1.12596	down
ko04015	Rap1 signaling pathway	0.340335	ENSRNOG00000005650	Pgf	K16859	NA	placental growth factor [Source:RGD Symbol;Acc:619850]	4.74821	4.86013	6.89225	1.81335	1.74628	1.74662	3.10965	1.63675	up
ko04015	Rap1 signaling pathway	0.340335	ENSRNOG00000008223	Cnr1	K04277	NA	cannabinoid receptor 1 [Source:RGD Symbol;Acc:2369]	1.5166	1.73802	1.62987	3.34558	5.79038	5.24774	0.339586	-1.55815	down
ko04015	Rap1 signaling pathway	0.340335	ENSRNOG00000008587	Tek	K05121	EC:2.7.10.1	TEK receptor tyrosine kinase [Source:RGD Symbol;Acc:620980]	65.5676	80.6655	55.963	143.626	152.459	196.801	0.410229	-1.2855	down
ko04015	Rap1 signaling pathway	0.340335	ENSRNOG00000013825	Rap1gap	K17700	NA	Rap1 GTPase-activating protein [Source:RGD Symbol;Acc:1309908]	5.59972	4.15612	4.02764	12.2767	10.1399	11.623	0.404924	-1.30428	down
ko04015	Rap1 signaling pathway	0.340335	ENSRNOG00000013886	Fyb1	K17698	NA	FYN binding protein 1 [Source:RGD Symbol;Acc:1563421]	4.91968	4.97243	4.22258	8.29223	11.0457	9.38685	0.491377	-1.0251	down
ko04015	Rap1 signaling pathway	0.340335	ENSRNOG00000015260	Lpar3	K04294	NA	lysophosphatidic acid receptor 3 [Source:RGD Symbol;Acc:620565]	4.46911	5.9081	4.11901	16.6929	15.1815	12.4222	0.327254	-1.61152	down
ko04015	Rap1 signaling pathway	0.340335	ENSRNOG00000016571	Ngf	K02582	NA	nerve growth factor [Source:RGD Symbol;Acc:1598328]	0.683532	0.348949	0.591755	0.156563	0.22621	0.0462036	3.78631	1.92079	up
ko04015	Rap1 signaling pathway	0.340335	ENSRNOG00000016696	Angpt2	K05466	NA	angiopoietin 2 [Source:RGD Symbol;Acc:621861]	8.59042	8.08431	6.18316	3.01199	2.77709	3.05503	2.58453	1.3699	up
ko04015	Rap1 signaling pathway	0.340335	ENSRNOG00000017429	Lat	K07362	NA	linker for activation of T cells [Source:RGD Symbol;Acc:620802]	7.77653	7.11948	5.88298	20.675	13.8754	9.08614	0.476183	-1.07041	down
ko04015	Rap1 signaling pathway	0.340335	ENSRNOG00000018461	Pdgfrb	NA	NA	platelet derived growth factor receptor beta [Source:RGD Symbol;Acc:3285]	29.9477	33.1625	27.8463	12.2108	11.6934	13.6546	2.42171	1.27603	up
ko04015	Rap1 signaling pathway	0.340335	ENSRNOG00000020588	Efna4	K05462	NA	ephrin A4 [Source:RGD Symbol;Acc:1307808]	4.37508	3.91485	4.22177	1.50692	1.92215	1.37655	2.60356	1.38048	up
ko04015	Rap1 signaling pathway	0.340335	ENSRNOG00000021098	Rasgrp2	K12361	NA	RAS guanyl releasing protein 2 [Source:RGD Symbol;Acc:1311630]	8.21941	9.41176	4.73127	17.3456	22.6314	17.6577	0.388003	-1.36586	down
ko04015	Rap1 signaling pathway	0.340335	ENSRNOG00000021569	Tiam1	K05731	NA	T-cell lymphoma invasion and metastasis 1 [Source:RGD Symbol;Acc:1307455]	2.12158	2.24547	1.49218	0.584266	1.21954	1.06253	2.04415	1.0315	up
ko04015	Rap1 signaling pathway	0.340335	ENSRNOG00000033119	Plcb4	K05858	EC:3.1.4.11	phospholipase C, beta 4 [Source:RGD Symbol;Acc:3345]	7.14989	7.94063	6.17429	13.1434	15.847	14.3553	0.490587	-1.02742	down
ko04015	Rap1 signaling pathway	0.340335	ENSRNOG00000045829	Thbs1	K16857	NA	thrombospondin 1 [Source:RGD Symbol;Acc:1588455]	69.4641	106.372	164.303	19.9347	19.858	26.7682	5.11019	2.35338	up
ko04015	Rap1 signaling pathway	0.340335	ENSRNOG00000051964	LOC108348190	K04357	NA	uncharacterized LOC108348190 [Source:RGD Symbol;Acc:11520363]	0.212498	0.315292	0.147029	0.358931	0.514377	0.568232	0.468124	-1.09504	down
ko04015	Rap1 signaling pathway	0.340335	ENSRNOG00000052205	Fgf23	K22428	NA	fibroblast growth factor 23 [Source:RGD Symbol;Acc:620178]	0.318321	0.976255	0.694014	0	0	0	6628.63	12.6945	up
ko04015	Rap1 signaling pathway	0.340335	ENSRNOG00000054371	Prkcg	K19663	EC:2.7.11.13	protein kinase C, gamma [Source:RGD Symbol;Acc:3397]	1.53377	1.93347	1.8286	3.48216	4.70262	3.15826	0.46688	-1.09888	down
ko04015	Rap1 signaling pathway	0.340335	ENSRNOG00000059479	Adcy1	K08041	EC:4.6.1.1	adenylate cyclase 1 [Source:RGD Symbol;Acc:1309318]	0.206208	0.356452	0.124273	1.28217	1.19576	1.45355	0.174726	-2.51683	down
ko04012	ErbB signaling pathway	0.3504	ENSRNOG00000000521	Cdkn1a	K06625	NA	cyclin-dependent kinase inhibitor 1A [Source:RGD Symbol;Acc:69328]	60.966	98.6015	55.2437	36.6148	37.2161	27.4646	2.12064	1.0845	up
ko04012	ErbB signaling pathway	0.3504	ENSRNOG00000002754	Areg	K09782	NA	amphiregulin [Source:RGD Symbol;Acc:2149]	15.0098	32.3225	41.5271	12.678	12.7718	5.23223	2.89613	1.53413	up
ko04012	ErbB signaling pathway	0.3504	ENSRNOG00000002771	Ereg	K09784	NA	epiregulin [Source:RGD Symbol;Acc:620299]	3.53527	6.81166	10.5663	3.01735	3.00566	2.96011	2.32806	1.21913	up
ko04012	ErbB signaling pathway	0.3504	ENSRNOG00000008030	Shc2	K17447	NA	SHC adaptor protein 2 [Source:RGD Symbol;Acc:1307137]	1.08558	1.2228	0.495709	1.31078	2.86654	1.98796	0.45482	-1.13663	down
ko04012	ErbB signaling pathway	0.3504	ENSRNOG00000014248	Erbb4	K05085	EC:2.7.10.1	erb-b2 receptor tyrosine kinase 4 [Source:RGD Symbol;Acc:620486]	0.102964	0.118757	0.047957	0.602772	0.820792	0.860173	0.118086	-3.08209	down
ko04012	ErbB signaling pathway	0.3504	ENSRNOG00000018712	Camk2a	K04515	EC:2.7.11.17	calcium/calmodulin-dependent protein kinase II alpha [Source:RGD Symbol;Acc:2261]	0.637376	1.01802	0.591485	1.83401	1.77662	1.39807	0.448596	-1.15651	down
ko04012	ErbB signaling pathway	0.3504	ENSRNOG00000051964	LOC108348190	K04357	NA	uncharacterized LOC108348190 [Source:RGD Symbol;Acc:11520363]	0.212498	0.315292	0.147029	0.358931	0.514377	0.568232	0.468124	-1.09504	down
ko04012	ErbB signaling pathway	0.3504	ENSRNOG00000051986	Plcg2	NA	NA	phospholipase C, gamma 2 [Source:RGD Symbol;Acc:3348]	5.19104	6.76231	4.63746	12.3585	15.9316	15.9714	0.374836	-1.41567	down
ko04012	ErbB signaling pathway	0.3504	ENSRNOG00000054371	Prkcg	K19663	EC:2.7.11.13	protein kinase C, gamma [Source:RGD Symbol;Acc:3397]	1.53377	1.93347	1.8286	3.48216	4.70262	3.15826	0.46688	-1.09888	down
ko00533	Glycosaminoglycan biosynthesis - keratan sulfate	0.355391	ENSRNOG00000018267	B3gnt7	K09664	EC:2.4.1.-	UDP-GlcNAc:betaGal beta-1,3-N-acetylglucosaminyltransferase 7 [Source:RGD Symbol;Acc:1310580]	19.4867	15.5362	22.6715	9.39762	9.61533	7.83939	2.14858	1.10338	up
ko00533	Glycosaminoglycan biosynthesis - keratan sulfate	0.355391	ENSRNOG00000021521	Chst5	K09671	EC:2.8.2.-	carbohydrate sulfotransferase 5 [Source:RGD Symbol;Acc:1561144]	1.28668	1.03946	1.2921	0.101173	0.216761	0.135007	7.98831	2.99789	up
ko04950	Maturity onset diabetes of the young	0.358345	ENSRNOG00000008971	Hnf4g	K08037	NA	hepatocyte nuclear factor 4, gamma [Source:RGD Symbol;Acc:1310102]	0.0989226	0.251221	0.0819739	0.363114	0.407372	0.367394	0.379757	-1.39685	down
ko04950	Maturity onset diabetes of the young	0.358345	ENSRNOG00000014256	Foxa3	K08038	NA	forkhead box A3 [Source:RGD Symbol;Acc:2809]	0.772244	0.521902	0.453114	0.227934	0.194495	0.093878	3.38415	1.75879	up
ko04950	Maturity onset diabetes of the young	0.358345	ENSRNOG00000025164	Bhlha15	K08040	NA	basic helix-loop-helix family, member a15 [Source:RGD Symbol;Acc:3091]	2.01462	1.53193	2.745	0.712762	0.542006	0.776017	3.09809	1.63138	up
ko04668	TNF signaling pathway	0.358794	ENSRNOG00000002525	Ptgs2	NA	NA	prostaglandin-endoperoxide synthase 2 [Source:RGD Symbol;Acc:620349]	1.16561	3.47891	3.42764	1.65163	1.08205	1.05589	2.1301	1.09092	up
ko04668	TNF signaling pathway	0.358794	ENSRNOG00000002723	Sele	K06494	NA	selectin E [Source:RGD Symbol;Acc:3654]	2.98187	1.19921	3.6168	0.289072	0.400788	0.3301	7.64528	2.93457	up
ko04668	TNF signaling pathway	0.358794	ENSRNOG00000007002	Lif	K05419	NA	LIF, interleukin 6 family cytokine [Source:RGD Symbol;Acc:620865]	2.79472	2.7336	5.46239	0.419517	0.645634	0.611047	6.55692	2.71302	up
ko04668	TNF signaling pathway	0.358794	ENSRNOG00000007159	Ccl2	K14624	NA	C-C motif chemokine ligand 2 [Source:RGD Symbol;Acc:3645]	37.7066	18.9936	41.8423	1.20024	1.4775	2.90705	17.6448	4.14117	up
ko04668	TNF signaling pathway	0.358794	ENSRNOG00000010278	Il6	K05405	NA	interleukin 6 [Source:RGD Symbol;Acc:2901]	3.16485	2.11915	11.0231	0.116354	0.115796	0.224046	35.7458	5.1597	up
ko04668	TNF signaling pathway	0.358794	ENSRNOG00000010906	Ccl5	K12499	NA	C-C motif chemokine ligand 5 [Source:RGD Symbol;Acc:69069]	33.6073	45.533	17.0812	161.621	269.977	147.801	0.166071	-2.59013	down
ko04668	TNF signaling pathway	0.358794	ENSRNOG00000010947	Mmp14	K07763	EC:3.4.24.80	matrix metallopeptidase 14 [Source:RGD Symbol;Acc:620198]	73.5681	51.0079	51.6732	22.5951	16.4562	16.8319	3.15389	1.65713	up
ko04668	TNF signaling pathway	0.358794	ENSRNOG00000015992	Ccl20	NA	NA	C-C motif chemokine ligand 20 [Source:RGD Symbol;Acc:3646]	3.55187	1.52624	2.52854	0.934769	1.07933	0.51172	3.01156	1.59051	up
ko04668	TNF signaling pathway	0.358794	ENSRNOG00000017539	Mmp9	K01403	EC:3.4.24.35	matrix metallopeptidase 9 [Source:RGD Symbol;Acc:621320]	0.708985	0.326444	0.167858	0.688657	1.06294	1.59762	0.359274	-1.47684	down
ko04668	TNF signaling pathway	0.358794	ENSRNOG00000029768	Ccl12	K14624	NA	chemokine (C-C motif) ligand 12 [Source:RGD Symbol;Acc:1309255]	6.0007	2.47451	2.57848	0	0.075135	0.603588	16.286	4.02556	up
ko04668	TNF signaling pathway	0.358794	ENSRNOG00000043416	Bcl3	K09258	NA	BCL3, transcription coactivator [Source:RGD Symbol;Acc:1589465]	16.3829	10.3304	23.1764	7.54362	6.2	4.80462	2.68972	1.42746	up
ko04961	Endocrine and other factor-regulated calcium reabsorption	0.38565	ENSRNOG00000001092	Kl	K14756	EC:3.2.1.31	Klotho [Source:RGD Symbol;Acc:620396]	2.60662	5.62618	3.57293	8.08057	8.68837	10.3107	0.435964	-1.19772	down
ko04961	Endocrine and other factor-regulated calcium reabsorption	0.38565	ENSRNOG00000007290	Atp1a2	K01539	EC:7.2.2.13	ATPase Na+/K+ transporting subunit alpha 2 [Source:RGD Symbol;Acc:2168]	1.11361	2.2107	0.439613	6.71531	7.20043	7.69308	0.174185	-2.52131	down
ko04961	Endocrine and other factor-regulated calcium reabsorption	0.38565	ENSRNOG00000020948	Pth1r	K04585	NA	parathyroid hormone 1 receptor [Source:RGD Symbol;Acc:3442]	8.63491	9.04509	5.00246	3.75007	3.62401	3.48961	2.08792	1.06206	up
ko04961	Endocrine and other factor-regulated calcium reabsorption	0.38565	ENSRNOG00000033119	Plcb4	K05858	EC:3.1.4.11	phospholipase C, beta 4 [Source:RGD Symbol;Acc:3345]	7.14989	7.94063	6.17429	13.1434	15.847	14.3553	0.490587	-1.02742	down
ko04961	Endocrine and other factor-regulated calcium reabsorption	0.38565	ENSRNOG00000054371	Prkcg	K19663	EC:2.7.11.13	protein kinase C, gamma [Source:RGD Symbol;Acc:3397]	1.53377	1.93347	1.8286	3.48216	4.70262	3.15826	0.46688	-1.09888	down
ko01524	Platinum drug resistance	0.386025	ENSRNOG00000000521	Cdkn1a	K06625	NA	cyclin-dependent kinase inhibitor 1A [Source:RGD Symbol;Acc:69328]	60.966	98.6015	55.2437	36.6148	37.2161	27.4646	2.12064	1.0845	up
ko01524	Platinum drug resistance	0.386025	ENSRNOG00000002978	Faslg	K04389	NA	Fas ligand [Source:RGD Symbol;Acc:3880]	0.816894	1.01133	0.807977	3.43662	5.79528	3.71874	0.203558	-2.29649	down
ko01524	Platinum drug resistance	0.386025	ENSRNOG00000012878	Atp7b	K17686	EC:7.2.2.8	ATPase copper transporting beta [Source:RGD Symbol;Acc:2180]	0.320325	0.146971	0.19402	0.529415	0.815515	0.591864	0.341449	-1.55026	down
ko01524	Platinum drug resistance	0.386025	ENSRNOG00000019017	Gstm6	K00799	EC:2.5.1.18	glutathione S-transferase, mu 6 [Source:RGD Symbol;Acc:1563391]	0.072552	0.084308	0.123574	0.465283	0.252652	0.528694	0.224954	-2.1523	down
ko01524	Platinum drug resistance	0.386025	ENSRNOG00000049743	Gstm5	K00799	EC:2.5.1.18	glutathione S-transferase, mu 5 [Source:RGD Symbol;Acc:61964]	14.3618	10.7391	15.0375	7.82087	6.10415	5.18534	2.10035	1.07063	up
ko01524	Platinum drug resistance	0.386025	ENSRNOG00000050819	Birc5	K08731	NA	baculoviral IAP repeat-containing 5 [Source:RGD Symbol;Acc:70499]	6.52015	7.59906	9.03216	1.48435	2.46768	2.33775	3.68079	1.88002	up
ko01524	Platinum drug resistance	0.386025	ENSRNOG00000053047	Top2a	K03164	EC:5.6.2.2	DNA topoisomerase II alpha [Source:RGD Symbol;Acc:62048]	8.73574	8.81422	9.96956	2.39758	3.95071	3.50077	2.79412	1.4824	up
ko01524	Platinum drug resistance	0.386025	ENSRNOG00000059837	Cdkn2a	K06621	NA	cyclin-dependent kinase inhibitor 2A [Source:RGD Symbol;Acc:2323]	1.75201	2.25335	0.861979	0.590342	0.229968	0.204869	4.7478	2.24726	up
ko04921	Oxytocin signaling pathway	0.388015	ENSRNOG00000000521	Cdkn1a	K06625	NA	cyclin-dependent kinase inhibitor 1A [Source:RGD Symbol;Acc:69328]	60.966	98.6015	55.2437	36.6148	37.2161	27.4646	2.12064	1.0845	up
ko04921	Oxytocin signaling pathway	0.388015	ENSRNOG00000001216	Trpm2	K04977	EC:3.6.1.13	transient receptor potential cation channel, subfamily M, member 2 [Source:RGD Symbol;Acc:1311889]	2.73189	2.39503	2.50324	6.81675	11.5299	8.15396	0.287924	-1.79624	down
ko04921	Oxytocin signaling pathway	0.388015	ENSRNOG00000002525	Ptgs2	NA	NA	prostaglandin-endoperoxide synthase 2 [Source:RGD Symbol;Acc:620349]	1.16561	3.47891	3.42764	1.65163	1.08205	1.05589	2.1301	1.09092	up
ko04921	Oxytocin signaling pathway	0.388015	ENSRNOG00000003245	Cacng1	NA	NA	calcium voltage-gated channel auxiliary subunit gamma 1 [Source:RGD Symbol;Acc:2249]	0.342541	0.070667	0.216756	0.041472	0	0	15.1901	3.92506	up
ko04921	Oxytocin signaling pathway	0.388015	ENSRNOG00000006645	Ryr3	K04963	NA	ryanodine receptor 3 [Source:RGD Symbol;Acc:68952]	0.552848	0.70992	0.557857	1.46945	1.2114	2.06304	0.383784	-1.38163	down
ko04921	Oxytocin signaling pathway	0.388015	ENSRNOG00000007666	Cacnb4	K04865	NA	calcium voltage-gated channel auxiliary subunit beta 4 [Source:RGD Symbol;Acc:68385]	0.231166	0.227915	0.115713	0.714819	1.19904	0.551053	0.23319	-2.10042	down
ko04921	Oxytocin signaling pathway	0.388015	ENSRNOG00000009440	Gucy1b2	K12319	EC:4.6.1.2	guanylate cyclase 1 soluble subunit beta 2 [Source:RGD Symbol;Acc:2770]	0.0654379	0.0684079	0.0307582	0	0	0	548.68	9.09982	up
ko04921	Oxytocin signaling pathway	0.388015	ENSRNOG00000013869	Kcnj4	K04998	NA	potassium voltage-gated channel subfamily J member 4 [Source:RGD Symbol;Acc:621436]	0.672457	0.651424	0.289846	1.83666	2.54504	2.38856	0.238355	-2.06881	down
ko04921	Oxytocin signaling pathway	0.388015	ENSRNOG00000018712	Camk2a	K04515	EC:2.7.11.17	calcium/calmodulin-dependent protein kinase II alpha [Source:RGD Symbol;Acc:2261]	0.637376	1.01802	0.591485	1.83401	1.77662	1.39807	0.448596	-1.15651	down
ko04921	Oxytocin signaling pathway	0.388015	ENSRNOG00000020246	Myl9	K12755	NA	myosin light chain 9 [Source:RGD Symbol;Acc:1311235]	135.556	142.75	155.595	45.8177	50.7849	52.6763	2.90665	1.53936	up
ko04921	Oxytocin signaling pathway	0.388015	ENSRNOG00000020557	Ryr1	K04961	NA	ryanodine receptor 1 [Source:RGD Symbol;Acc:1586637]	0.0419302	0.0748344	0.0894049	0.149468	0.126131	0.169126	0.463588	-1.10908	down
ko04921	Oxytocin signaling pathway	0.388015	ENSRNOG00000033119	Plcb4	K05858	EC:3.1.4.11	phospholipase C, beta 4 [Source:RGD Symbol;Acc:3345]	7.14989	7.94063	6.17429	13.1434	15.847	14.3553	0.490587	-1.02742	down
ko04921	Oxytocin signaling pathway	0.388015	ENSRNOG00000054274	Cacnb3	NA	NA	calcium voltage-gated channel auxiliary subunit beta 3 [Source:RGD Symbol;Acc:2248]	12.6099	10.2322	7.67604	5.49561	3.55387	4.34237	2.27886	1.18831	up
ko04921	Oxytocin signaling pathway	0.388015	ENSRNOG00000054371	Prkcg	K19663	EC:2.7.11.13	protein kinase C, gamma [Source:RGD Symbol;Acc:3397]	1.53377	1.93347	1.8286	3.48216	4.70262	3.15826	0.46688	-1.09888	down
ko04921	Oxytocin signaling pathway	0.388015	ENSRNOG00000059479	Adcy1	K08041	EC:4.6.1.1	adenylate cyclase 1 [Source:RGD Symbol;Acc:1309318]	0.206208	0.356452	0.124273	1.28217	1.19576	1.45355	0.174726	-2.51683	down
ko05033	Nicotine addiction	0.396333	ENSRNOG00000004560	Cacna1b	K04849	NA	calcium voltage-gated channel subunit alpha1 B [Source:RGD Symbol;Acc:628852]	0.178632	0.207804	0.083371	0.0219777	0.0460863	0.0587362	3.7051	1.88951	up
ko05033	Nicotine addiction	0.396333	ENSRNOG00000005723	Grin3a	K05213	NA	glutamate ionotropic receptor NMDA type subunit 3A [Source:RGD Symbol;Acc:621704]	0.246836	0.126828	0.17107	0	0	0	1815.78	10.8264	up
ko05033	Nicotine addiction	0.396333	ENSRNOG00000011202	Chrna4	K04806	NA	cholinergic receptor nicotinic alpha 4 subunit [Source:RGD Symbol;Acc:2346]	0.0771047	0.0859449	0.0798405	0.579064	0.546145	0.315917	0.168542	-2.56882	down
ko05033	Nicotine addiction	0.396333	ENSRNOG00000032417	Gabrp	K05189	NA	gamma-aminobutyric acid type A receptor pi subunit [Source:RGD Symbol;Acc:620532]	3.74924	2.43961	2.02034	0.092348	0.19525	0.36241	12.6294	3.65871	up
ko04024	cAMP signaling pathway	0.407986	ENSRNOG00000000413	Pln	K05852	NA	phospholamban [Source:RGD Symbol;Acc:619894]	2.50693	3.8037	2.06136	1.0686	1.05846	0.925892	2.74226	1.45537	up
ko04024	cAMP signaling pathway	0.407986	ENSRNOG00000002607	Sox9	K18435	NA	SRY box 9 [Source:RGD Symbol;Acc:620474]	0.120299	0.141518	0.108652	0.275685	0.369276	0.760508	0.263591	-1.92363	down
ko04024	cAMP signaling pathway	0.407986	ENSRNOG00000003442	Adora1	NA	NA	adenosine A1 receptor [Source:RGD Symbol;Acc:2048]	2.22958	2.85704	1.93044	0.530347	0.128806	0.423696	6.48019	2.69604	up
ko04024	cAMP signaling pathway	0.407986	ENSRNOG00000005723	Grin3a	K05213	NA	glutamate ionotropic receptor NMDA type subunit 3A [Source:RGD Symbol;Acc:621704]	0.246836	0.126828	0.17107	0	0	0	1815.78	10.8264	up
ko04024	cAMP signaling pathway	0.407986	ENSRNOG00000007290	Atp1a2	K01539	EC:7.2.2.13	ATPase Na+/K+ transporting subunit alpha 2 [Source:RGD Symbol;Acc:2168]	1.11361	2.2107	0.439613	6.71531	7.20043	7.69308	0.174185	-2.52131	down
ko04024	cAMP signaling pathway	0.407986	ENSRNOG00000009768	LOC100912228	NA	NA	pro-neuropeptide Y-like [Source:RGD Symbol;Acc:6487865]	5.52974	7.0638	11.5309	19.3687	12.1043	22.9197	0.443523	-1.17292	down
ko04024	cAMP signaling pathway	0.407986	ENSRNOG00000014039	Sucnr1	K10042	NA	succinate receptor 1 [Source:RGD Symbol;Acc:1303193]	0.121417	0.237802	0.071108	0	0	0	1434.42	10.4863	up
ko04024	cAMP signaling pathway	0.407986	ENSRNOG00000014149	Npy1r	NA	NA	neuropeptide Y receptor Y1 [Source:RGD Symbol;Acc:3198]	0	0	0	0.222327	0.145005	0.166436	0.000562042	-10.797	down
ko04024	cAMP signaling pathway	0.407986	ENSRNOG00000018712	Camk2a	K04515	EC:2.7.11.17	calcium/calmodulin-dependent protein kinase II alpha [Source:RGD Symbol;Acc:2261]	0.637376	1.01802	0.591485	1.83401	1.77662	1.39807	0.448596	-1.15651	down
ko04024	cAMP signaling pathway	0.407986	ENSRNOG00000019518	Pde4c	K13293	EC:3.1.4.53	phosphodiesterase 4C [Source:RGD Symbol;Acc:727918]	3.44955	3.5173	4.16828	12.8874	12.1926	12.824	0.293772	-1.76723	down
ko04024	cAMP signaling pathway	0.407986	ENSRNOG00000020246	Myl9	K12755	NA	myosin light chain 9 [Source:RGD Symbol;Acc:1311235]	135.556	142.75	155.595	45.8177	50.7849	52.6763	2.90665	1.53936	up
ko04024	cAMP signaling pathway	0.407986	ENSRNOG00000021569	Tiam1	K05731	NA	T-cell lymphoma invasion and metastasis 1 [Source:RGD Symbol;Acc:1307455]	2.12158	2.24547	1.49218	0.584266	1.21954	1.06253	2.04415	1.0315	up
ko04024	cAMP signaling pathway	0.407986	ENSRNOG00000025120	Gli1	K16797	NA	GLI family zinc finger 1 [Source:RGD Symbol;Acc:621673]	3.22817	2.74387	2.02003	0.698325	0.477126	0.544131	4.64769	2.21651	up
ko04024	cAMP signaling pathway	0.407986	ENSRNOG00000028404	Ppp1r1b	K15494	NA	protein phosphatase 1, regulatory (inhibitor) subunit 1B [Source:RGD Symbol;Acc:621859]	7.76903	6.02664	5.6708	46.913	54.7082	46.5414	0.131386	-2.92812	down
ko04024	cAMP signaling pathway	0.407986	ENSRNOG00000030269	Atp2b2	K05850	EC:7.2.2.10	ATPase plasma membrane Ca2+ transporting 2 [Source:RGD Symbol;Acc:2176]	0.0144165	0.0177611	0.0181006	0.0829795	0.0884165	0.0269138	0.253534	-1.97975	down
ko04024	cAMP signaling pathway	0.407986	ENSRNOG00000046449	Npy	K05232	NA	neuropeptide Y [Source:RGD Symbol;Acc:3197]	5.83501	7.53937	12.3021	20.7918	13.0994	24.5613	0.43927	-1.18682	down
ko04024	cAMP signaling pathway	0.407986	ENSRNOG00000048145	Sstr1	K04217	NA	somatostatin receptor 1 [Source:RGD Symbol;Acc:3762]	0.145416	0.387908	0.213102	1.29021	1.61171	1.86831	0.156476	-2.67599	down
ko04024	cAMP signaling pathway	0.407986	ENSRNOG00000055103	Cftr	K05031	EC:5.6.1.6	cystic fibrosis transmembrane conductance regulator [Source:RGD Symbol;Acc:2332]	3.08251	3.45411	2.56982	1.14851	0.941143	0.718715	3.2426	1.69715	up
ko04024	cAMP signaling pathway	0.407986	ENSRNOG00000059479	Adcy1	K08041	EC:4.6.1.1	adenylate cyclase 1 [Source:RGD Symbol;Acc:1309318]	0.206208	0.356452	0.124273	1.28217	1.19576	1.45355	0.174726	-2.51683	down
ko04730	Long-term depression	0.408503	ENSRNOG00000002361	Prkg2	K19477	EC:2.7.11.12	protein kinase cGMP-dependent 2 [Source:RGD Symbol;Acc:3401]	0.031366	0.079933	0.107604	0	0	0.017976	12.1775	3.60615	up
ko04730	Long-term depression	0.408503	ENSRNOG00000009440	Gucy1b2	K12319	EC:4.6.1.2	guanylate cyclase 1 soluble subunit beta 2 [Source:RGD Symbol;Acc:2770]	0.0654379	0.0684079	0.0307582	0	0	0	548.68	9.09982	up
ko04730	Long-term depression	0.408503	ENSRNOG00000014290	Grm1	K04603	NA	glutamate metabotropic receptor 1 [Source:RGD Symbol;Acc:2742]	0.009912	0	0.015688	0.069331	0.104979	0.0226431	0.12998	-2.94364	down
ko04730	Long-term depression	0.408503	ENSRNOG00000020557	Ryr1	K04961	NA	ryanodine receptor 1 [Source:RGD Symbol;Acc:1586637]	0.0419302	0.0748344	0.0894049	0.149468	0.126131	0.169126	0.463588	-1.10908	down
ko04730	Long-term depression	0.408503	ENSRNOG00000033119	Plcb4	K05858	EC:3.1.4.11	phospholipase C, beta 4 [Source:RGD Symbol;Acc:3345]	7.14989	7.94063	6.17429	13.1434	15.847	14.3553	0.490587	-1.02742	down
ko04730	Long-term depression	0.408503	ENSRNOG00000054371	Prkcg	K19663	EC:2.7.11.13	protein kinase C, gamma [Source:RGD Symbol;Acc:3397]	1.53377	1.93347	1.8286	3.48216	4.70262	3.15826	0.46688	-1.09888	down
ko00120	Primary bile acid biosynthesis	0.420453	ENSRNOG00000009730	Cyp7b1	K07430	EC:1.14.14.29	cytochrome P450 family 7 subfamily B member 1 [Source:RGD Symbol;Acc:2483]	2.71878	2.18867	3.39701	0.862637	0.912831	0.982169	3.01144	1.59045	up
ko00120	Primary bile acid biosynthesis	0.420453	ENSRNOG00000019141	Ch25h	K10223	EC:1.14.99.38	cholesterol 25-hydroxylase [Source:RGD Symbol;Acc:1310575]	13.2671	15.1262	19.7347	5.72503	6.0097	7.99649	2.43918	1.2864	up
ko03460	Fanconi anemia pathway	0.421866	ENSRNOG00000005038	Ube2t	K13960	EC:2.3.2.23	ubiquitin-conjugating enzyme E2T [Source:RGD Symbol;Acc:1310816]	3.06677	3.26999	3.43338	1.02932	1.31981	1.51938	2.52556	1.3366	up
ko03460	Fanconi anemia pathway	0.421866	ENSRNOG00000024420	Eme1	K10882	EC:3.1.22.-	essential meiotic structure-specific endonuclease 1 [Source:RGD Symbol;Acc:1309067]	0.547405	0.604915	0.587618	0.166858	0.159627	0.095456	4.12365	2.04392	up
ko03460	Fanconi anemia pathway	0.421866	ENSRNOG00000037302	Rad51	K04482	NA	RAD51 recombinase [Source:RGD Symbol;Acc:1563603]	2.11551	1.94133	3.48695	0.481172	0.544104	0.679288	4.42565	2.14589	up
ko03460	Fanconi anemia pathway	0.421866	ENSRNOG00000059997	Brip1	K15362	EC:3.6.4.12	BRCA1 interacting protein C-terminal helicase 1 [Source:RGD Symbol;Acc:1307659]	0.522925	0.757306	0.81892	0.184994	0.283792	0.24918	2.92375	1.54782	up
ko03460	Fanconi anemia pathway	0.421866	ENSRNOG00000061085	Fancd2	K10891	NA	FA complementation group D2 [Source:RGD Symbol;Acc:1303172]	1.59932	1.45221	1.67574	0.522487	0.837317	0.728835	2.26332	1.17844	up
ko00140	Steroid hormone biosynthesis	0.424785	ENSRNOG00000000428	Cyp21a1	K00513	EC:1.14.14.16	cytochrome P450, family 21, subfamily a, polypeptide 1 [Source:RGD Symbol;Acc:2461]	0.80946	0.470778	1.08384	0.346546	0.383179	0.114351	2.80079	1.48583	up
ko00140	Steroid hormone biosynthesis	0.424785	ENSRNOG00000009730	Cyp7b1	K07430	EC:1.14.14.29	cytochrome P450 family 7 subfamily B member 1 [Source:RGD Symbol;Acc:2483]	2.71878	2.18867	3.39701	0.862637	0.912831	0.982169	3.01144	1.59045	up
ko00140	Steroid hormone biosynthesis	0.424785	ENSRNOG00000012458	Cyp2e1	K07415	EC:1.14.13.-	cytochrome P450, family 2, subfamily e, polypeptide 1 [Source:RGD Symbol;Acc:2475]	1.59029	2.0422	0.503894	11.7452	14.7012	19.1101	0.090797	-3.46121	down
ko00140	Steroid hormone biosynthesis	0.424785	ENSRNOG00000017531	Akr1c3	K05295	EC:1.1.1.149	aldo-keto reductase family 1, member C3 [Source:RGD Symbol;Acc:708428]	0.106261	0.041791	0.140541	0	0	0	961.977	9.90986	up
ko00140	Steroid hormone biosynthesis	0.424785	ENSRNOG00000027042	Srd5a2	K12344	EC:1.3.1.22	steroid 5 alpha-reductase 2 [Source:RGD Symbol;Acc:621480]	0.537245	0.386602	0.075472	0.095092	0.074204	0.030068	5.01253	2.32554	up
ko00140	Steroid hormone biosynthesis	0.424785	ENSRNOG00000046643	Cyp3a9	K07424	EC:1.14.14.1	cytochrome P450, family 3, subfamily a, polypeptide 9 [Source:RGD Symbol;Acc:708392]	1.53291	1.42943	1.53715	3.08589	4.81783	3.05246	0.41068	-1.28391	down
ko04662	B cell receptor signaling pathway	0.426581	ENSRNOG00000011917	Cd79b	K06507	NA	CD79b molecule [Source:RGD Symbol;Acc:620012]	6.72672	11.9204	3.28746	16.4707	21.2954	22.7769	0.362298	-1.46475	down
ko04662	B cell receptor signaling pathway	0.426581	ENSRNOG00000018311	Cd19	K06465	NA	CD19 molecule [Source:RGD Symbol;Acc:1309086]	2.21263	3.85382	0.701309	6.29733	6.57261	7.80581	0.327328	-1.61119	down
ko04662	B cell receptor signaling pathway	0.426581	ENSRNOG00000020125	Cd79a	K06506	NA	CD79a molecule [Source:NCBI gene;Acc:100913063]	8.42119	9.76417	4.53518	18.3341	24.286	24.9955	0.336025	-1.57336	down
ko04662	B cell receptor signaling pathway	0.426581	ENSRNOG00000024000	Cd22	K06467	NA	CD22 molecule [Source:RGD Symbol;Acc:1311610]	1.79374	2.41713	1.90355	4.4542	6.11548	6.36242	0.361114	-1.46947	down
ko04662	B cell receptor signaling pathway	0.426581	ENSRNOG00000034164	Cr2	K04012	NA	complement C3d receptor 2 [Source:RGD Symbol;Acc:1310065]	0.230317	0.706351	0.165545	1.71495	1.52249	1.68717	0.223817	-2.15961	down
ko04662	B cell receptor signaling pathway	0.426581	ENSRNOG00000049925	Cd79al	K06506	NA	Cd79a molecule-like [Source:RGD Symbol;Acc:1598036]	5.57131	7.93722	3.64799	13.5778	15.2215	17.0725	0.37401	-1.41885	down
ko04662	B cell receptor signaling pathway	0.426581	ENSRNOG00000051986	Plcg2	NA	NA	phospholipase C, gamma 2 [Source:RGD Symbol;Acc:3348]	5.19104	6.76231	4.63746	12.3585	15.9316	15.9714	0.374836	-1.41567	down
ko00400	Phenylalanine, tyrosine and tryptophan biosynthesis	0.426653	ENSRNOG00000043116	RGD1308564	K03334	EC:1.4.3.2	similar to L-amino acid oxidase 1 [Source:RGD Symbol;Acc:1308564]	0.026424	0	0	0.340514	0.096658	0.17216	0.0433655	-4.52731	down
ko04360	Axon guidance	0.426697	ENSRNOG00000006509	Srgap3	K07526	NA	SLIT-ROBO Rho GTPase activating protein 3 [Source:RGD Symbol;Acc:1563152]	0.412605	0.499902	0.22081	0.931711	1.28844	1.07635	0.343793	-1.54039	down
ko04360	Axon guidance	0.426697	ENSRNOG00000007882	Ablim2	K07520	NA	actin binding LIM protein family, member 2 [Source:RGD Symbol;Acc:1303094]	0.671489	1.16085	0.897047	5.05697	6.39863	4.19886	0.174352	-2.51993	down
ko04360	Axon guidance	0.426697	ENSRNOG00000008996	Dpysl5	K07529	NA	dihydropyrimidinase-like 5 [Source:RGD Symbol;Acc:620467]	0.454828	0.496162	0.369269	0.107187	0.150715	0.09417	3.74997	1.90688	up
ko04360	Axon guidance	0.426697	ENSRNOG00000011133	Trpc4	K04967	NA	transient receptor potential cation channel, subfamily C, member 4 [Source:RGD Symbol;Acc:621276]	0.274794	0.506195	0.397683	0.047885	0.130389	0.050748	5.14654	2.3636	up
ko04360	Axon guidance	0.426697	ENSRNOG00000011858	Unc5d	K07521	NA	unc-5 netrin receptor D [Source:RGD Symbol;Acc:1309245]	0.0139338	0	0	0.138865	0.363346	0.152365	0.0212868	-5.55389	down
ko04360	Axon guidance	0.426697	ENSRNOG00000012531	Ephb2	K05111	EC:2.7.10.1	Eph receptor B2 [Source:RGD Symbol;Acc:1564232]	2.23762	1.21812	1.09861	0.747816	0.787266	0.556466	2.1775	1.12267	up
ko04360	Axon guidance	0.426697	ENSRNOG00000013072	Plxna4	K06820	NA	plexin A4 [Source:RGD Symbol;Acc:1308074]	1.78533	2.28069	3.35861	1.37412	1.09053	1.0043	2.14031	1.09782	up
ko04360	Axon guidance	0.426697	ENSRNOG00000014650	Sema4g	K06521	NA	semaphorin 4G [Source:RGD Symbol;Acc:1310436]	1.18712	2.11551	3.10514	0.518269	1.28814	0.624573	2.63588	1.39828	up
ko04360	Axon guidance	0.426697	ENSRNOG00000015618	Wnt5a	K00444	NA	Wnt family member 5A [Source:RGD Symbol;Acc:69250]	7.40085	6.90616	6.99221	3.0348	2.5955	2.2052	2.7183	1.4427	up
ko04360	Axon guidance	0.426697	ENSRNOG00000018712	Camk2a	K04515	EC:2.7.11.17	calcium/calmodulin-dependent protein kinase II alpha [Source:RGD Symbol;Acc:2261]	0.637376	1.01802	0.591485	1.83401	1.77662	1.39807	0.448596	-1.15651	down
ko04360	Axon guidance	0.426697	ENSRNOG00000018952	Sema3g	K06840	NA	semaphorin 3G [Source:RGD Symbol;Acc:1306079]	49.0443	67.1144	39.5881	86.0028	98.1809	146.428	0.471086	-1.08594	down
ko04360	Axon guidance	0.426697	ENSRNOG00000020246	Myl9	K12755	NA	myosin light chain 9 [Source:RGD Symbol;Acc:1311235]	135.556	142.75	155.595	45.8177	50.7849	52.6763	2.90665	1.53936	up
ko04360	Axon guidance	0.426697	ENSRNOG00000020588	Efna4	K05462	NA	ephrin A4 [Source:RGD Symbol;Acc:1307808]	4.37508	3.91485	4.22177	1.50692	1.92215	1.37655	2.60356	1.38048	up
ko04360	Axon guidance	0.426697	ENSRNOG00000051986	Plcg2	NA	NA	phospholipase C, gamma 2 [Source:RGD Symbol;Acc:3348]	5.19104	6.76231	4.63746	12.3585	15.9316	15.9714	0.374836	-1.41567	down
ko04360	Axon guidance	0.426697	ENSRNOG00000054165	LOC103692570	K07529	NA	dihydropyrimidinase-related protein 5-like [Source:RGD Symbol;Acc:9135001]	0.578359	0.343026	0.332311	0.050083	0.109199	0.172229	3.78176	1.91906	up
ko04360	Axon guidance	0.426697	ENSRNOG00000059857	Rnd1	K07531	NA	Rho family GTPase 1 [Source:RGD Symbol;Acc:1306338]	27.5036	15.5245	33.0023	10.3311	6.58827	10.4901	2.77387	1.4719	up
ko04360	Axon guidance	0.426697	ENSRNOG00000061230	L1cam	K06550	NA	L1 cell adhesion molecule [Source:RGD Symbol;Acc:619777]	0.831666	0.83209	0.561794	2.66189	2.62247	1.37554	0.334171	-1.58134	down
ko04621	NOD-like receptor signaling pathway	0.437609	ENSRNOG00000001216	Trpm2	K04977	EC:3.6.1.13	transient receptor potential cation channel, subfamily M, member 2 [Source:RGD Symbol;Acc:1311889]	2.73189	2.39503	2.50324	6.81675	11.5299	8.15396	0.287924	-1.79624	down
ko04621	NOD-like receptor signaling pathway	0.437609	ENSRNOG00000007159	Ccl2	K14624	NA	C-C motif chemokine ligand 2 [Source:RGD Symbol;Acc:3645]	37.7066	18.9936	41.8423	1.20024	1.4775	2.90705	17.6448	4.14117	up
ko04621	NOD-like receptor signaling pathway	0.437609	ENSRNOG00000010278	Il6	K05405	NA	interleukin 6 [Source:RGD Symbol;Acc:2901]	3.16485	2.11915	11.0231	0.116354	0.115796	0.224046	35.7458	5.1597	up
ko04621	NOD-like receptor signaling pathway	0.437609	ENSRNOG00000010906	Ccl5	K12499	NA	C-C motif chemokine ligand 5 [Source:RGD Symbol;Acc:69069]	33.6073	45.533	17.0812	161.621	269.977	147.801	0.166071	-2.59013	down
ko04621	NOD-like receptor signaling pathway	0.437609	ENSRNOG00000020733	Camp	K13916	NA	cathelicidin antimicrobial peptide [Source:RGD Symbol;Acc:1559878]	1.35987	0.998778	1.40631	2.74325	2.92398	3.19669	0.42475	-1.23531	down
ko04621	NOD-like receptor signaling pathway	0.437609	ENSRNOG00000021201	Txnip	K20910	NA	thioredoxin interacting protein [Source:RGD Symbol;Acc:620886]	265.603	310.069	283.244	814.57	559.371	547.032	0.447126	-1.16125	down
ko04621	NOD-like receptor signaling pathway	0.437609	ENSRNOG00000023943	Gbp1	K20899	NA	guanylate binding protein 1 [Source:NCBI gene;Acc:304266]	0.312661	0.332177	0.589758	0.94448	1.21129	1.00049	0.391159	-1.35417	down
ko04621	NOD-like receptor signaling pathway	0.437609	ENSRNOG00000029768	Ccl12	K14624	NA	chemokine (C-C motif) ligand 12 [Source:RGD Symbol;Acc:1309255]	6.0007	2.47451	2.57848	0	0.075135	0.603588	16.286	4.02556	up
ko04621	NOD-like receptor signaling pathway	0.437609	ENSRNOG00000030093	Defa5	K05230	NA	defensin alpha 5 [Source:RGD Symbol;Acc:727951]	0.31484	0	0.247739	1.65831	1.40795	1.09822	0.13509	-2.88801	down
ko04621	NOD-like receptor signaling pathway	0.437609	ENSRNOG00000033119	Plcb4	K05858	EC:3.1.4.11	phospholipase C, beta 4 [Source:RGD Symbol;Acc:3345]	7.14989	7.94063	6.17429	13.1434	15.847	14.3553	0.490587	-1.02742	down
ko04621	NOD-like receptor signaling pathway	0.437609	ENSRNOG00000033220	Oas1f	K14216	EC:2.7.7.84	2 ' -5 ' oligoadenylate synthetase 1K [Source:RGD Symbol;Acc:1359279]	3.6928	3.76642	4.23323	6.69215	8.17991	12.1065	0.433399	-1.20623	down
ko04621	NOD-like receptor signaling pathway	0.437609	ENSRNOG00000038135	RatNP-3b	K05230	NA	defensin RatNP-3 precursor [Source:RGD Symbol;Acc:1589653]	0.298655	0	0.104052	0.904851	0.837612	1.46829	0.125424	-2.99511	down
ko04621	NOD-like receptor signaling pathway	0.437609	ENSRNOG00000049282	Oas2	K14216	EC:2.7.7.84	2'-5' oligoadenylate synthetase 2 [Source:RGD Symbol;Acc:1359697]	5.34061	3.73047	5.27	6.26648	8.56011	14.4739	0.489448	-1.03077	down
ko04621	NOD-like receptor signaling pathway	0.437609	ENSRNOG00000059207	Oas3	K14216	EC:2.7.7.84	2'-5'-oligoadenylate synthetase 3 [Source:RGD Symbol;Acc:1359319]	0.872448	0.892314	1.46246	2.50712	3.07751	4.09149	0.333524	-1.58414	down
ko04621	NOD-like receptor signaling pathway	0.437609	ENSRNOG00000060745	Nlrp12	K20865	NA	NLR family, pyrin domain containing 12 [Source:RGD Symbol;Acc:1309415]	0.557805	0.295076	0.154233	1.08084	0.660252	1.63603	0.298217	-1.74556	down
ko04971	Gastric acid secretion	0.441473	ENSRNOG00000001656	Kcnj15	K05008	NA	potassium voltage-gated channel subfamily J member 15 [Source:RGD Symbol;Acc:621662]	4.6812	4.55168	4.3769	7.20508	12.7969	8.92056	0.470559	-1.08755	down
ko04971	Gastric acid secretion	0.441473	ENSRNOG00000007290	Atp1a2	K01539	EC:7.2.2.13	ATPase Na+/K+ transporting subunit alpha 2 [Source:RGD Symbol;Acc:2168]	1.11361	2.2107	0.439613	6.71531	7.20043	7.69308	0.174185	-2.52131	down
ko04971	Gastric acid secretion	0.441473	ENSRNOG00000018712	Camk2a	K04515	EC:2.7.11.17	calcium/calmodulin-dependent protein kinase II alpha [Source:RGD Symbol;Acc:2261]	0.637376	1.01802	0.591485	1.83401	1.77662	1.39807	0.448596	-1.15651	down
ko04971	Gastric acid secretion	0.441473	ENSRNOG00000033119	Plcb4	K05858	EC:3.1.4.11	phospholipase C, beta 4 [Source:RGD Symbol;Acc:3345]	7.14989	7.94063	6.17429	13.1434	15.847	14.3553	0.490587	-1.02742	down
ko04971	Gastric acid secretion	0.441473	ENSRNOG00000054371	Prkcg	K19663	EC:2.7.11.13	protein kinase C, gamma [Source:RGD Symbol;Acc:3397]	1.53377	1.93347	1.8286	3.48216	4.70262	3.15826	0.46688	-1.09888	down
ko04971	Gastric acid secretion	0.441473	ENSRNOG00000055103	Cftr	K05031	EC:5.6.1.6	cystic fibrosis transmembrane conductance regulator [Source:RGD Symbol;Acc:2332]	3.08251	3.45411	2.56982	1.14851	0.941143	0.718715	3.2426	1.69715	up
ko04971	Gastric acid secretion	0.441473	ENSRNOG00000059479	Adcy1	K08041	EC:4.6.1.1	adenylate cyclase 1 [Source:RGD Symbol;Acc:1309318]	0.206208	0.356452	0.124273	1.28217	1.19576	1.45355	0.174726	-2.51683	down
ko04014	Ras signaling pathway	0.449418	ENSRNOG00000002244	Pdgfra	K04363	EC:2.7.10.1	platelet derived growth factor receptor alpha [Source:RGD Symbol;Acc:3284]	10.7913	10.4928	10.1398	22.5292	21.8926	24.1598	0.458196	-1.12596	down
ko04014	Ras signaling pathway	0.449418	ENSRNOG00000002978	Faslg	K04389	NA	Fas ligand [Source:RGD Symbol;Acc:3880]	0.816894	1.01133	0.807977	3.43662	5.79528	3.71874	0.203558	-2.29649	down
ko04014	Ras signaling pathway	0.449418	ENSRNOG00000005650	Pgf	K16859	NA	placental growth factor [Source:RGD Symbol;Acc:619850]	4.74821	4.86013	6.89225	1.81335	1.74628	1.74662	3.10965	1.63675	up
ko04014	Ras signaling pathway	0.449418	ENSRNOG00000008030	Shc2	K17447	NA	SHC adaptor protein 2 [Source:RGD Symbol;Acc:1307137]	1.08558	1.2228	0.495709	1.31078	2.86654	1.98796	0.45482	-1.13663	down
ko04014	Ras signaling pathway	0.449418	ENSRNOG00000008587	Tek	K05121	EC:2.7.10.1	TEK receptor tyrosine kinase [Source:RGD Symbol;Acc:620980]	65.5676	80.6655	55.963	143.626	152.459	196.801	0.410229	-1.2855	down
ko04014	Ras signaling pathway	0.449418	ENSRNOG00000013953	Ntrk1	K03176	EC:2.7.10.1	neurotrophic receptor tyrosine kinase 1 [Source:RGD Symbol;Acc:620144]	0.089799	0.0959429	0.0319835	0.269543	0.411822	0.210092	0.244236	-2.03366	down
ko04014	Ras signaling pathway	0.449418	ENSRNOG00000016571	Ngf	K02582	NA	nerve growth factor [Source:RGD Symbol;Acc:1598328]	0.683532	0.348949	0.591755	0.156563	0.22621	0.0462036	3.78631	1.92079	up
ko04014	Ras signaling pathway	0.449418	ENSRNOG00000016696	Angpt2	K05466	NA	angiopoietin 2 [Source:RGD Symbol;Acc:621861]	8.59042	8.08431	6.18316	3.01199	2.77709	3.05503	2.58453	1.3699	up
ko04014	Ras signaling pathway	0.449418	ENSRNOG00000016945	Pla2g2a	NA	NA	phospholipase A2 group IIA [Source:RGD Symbol;Acc:620857]	430.776	142.041	305.208	62.6552	8.5295	13.1795	10.4076	3.37956	up
ko04014	Ras signaling pathway	0.449418	ENSRNOG00000016995	Zap70	K07360	EC:2.7.10.2	zeta chain of T cell receptor associated protein kinase 70 [Source:RGD Symbol;Acc:3983]	1.91387	2.38414	1.62197	5.55549	9.51381	5.03816	0.294417	-1.76407	down
ko04014	Ras signaling pathway	0.449418	ENSRNOG00000017429	Lat	K07362	NA	linker for activation of T cells [Source:RGD Symbol;Acc:620802]	7.77653	7.11948	5.88298	20.675	13.8754	9.08614	0.476183	-1.07041	down
ko04014	Ras signaling pathway	0.449418	ENSRNOG00000018461	Pdgfrb	NA	NA	platelet derived growth factor receptor beta [Source:RGD Symbol;Acc:3285]	29.9477	33.1625	27.8463	12.2108	11.6934	13.6546	2.42171	1.27603	up
ko04014	Ras signaling pathway	0.449418	ENSRNOG00000018827	LOC103694905	K04163	NA	5-hydroxytryptamine receptor 7 [Source:RGD Symbol;Acc:9265298]	0.601136	0.302224	0.67299	0.12608	0.271302	0.0872331	3.25279	1.70168	up
ko04014	Ras signaling pathway	0.449418	ENSRNOG00000018839	Ntrk2	K04360	EC:2.7.10.1	neurotrophic receptor tyrosine kinase 2 [Source:RGD Symbol;Acc:3213]	2.74908	5.01041	5.1754	0.644865	1.09069	0.941283	4.83215	2.27267	up
ko04014	Ras signaling pathway	0.449418	ENSRNOG00000020588	Efna4	K05462	NA	ephrin A4 [Source:RGD Symbol;Acc:1307808]	4.37508	3.91485	4.22177	1.50692	1.92215	1.37655	2.60356	1.38048	up
ko04014	Ras signaling pathway	0.449418	ENSRNOG00000021098	Rasgrp2	K12361	NA	RAS guanyl releasing protein 2 [Source:RGD Symbol;Acc:1311630]	8.21941	9.41176	4.73127	17.3456	22.6314	17.6577	0.388003	-1.36586	down
ko04014	Ras signaling pathway	0.449418	ENSRNOG00000021569	Tiam1	K05731	NA	T-cell lymphoma invasion and metastasis 1 [Source:RGD Symbol;Acc:1307455]	2.12158	2.24547	1.49218	0.584266	1.21954	1.06253	2.04415	1.0315	up
ko04014	Ras signaling pathway	0.449418	ENSRNOG00000051964	LOC108348190	K04357	NA	uncharacterized LOC108348190 [Source:RGD Symbol;Acc:11520363]	0.212498	0.315292	0.147029	0.358931	0.514377	0.568232	0.468124	-1.09504	down
ko04014	Ras signaling pathway	0.449418	ENSRNOG00000051986	Plcg2	NA	NA	phospholipase C, gamma 2 [Source:RGD Symbol;Acc:3348]	5.19104	6.76231	4.63746	12.3585	15.9316	15.9714	0.374836	-1.41567	down
ko04014	Ras signaling pathway	0.449418	ENSRNOG00000052205	Fgf23	K22428	NA	fibroblast growth factor 23 [Source:RGD Symbol;Acc:620178]	0.318321	0.976255	0.694014	0	0	0	6628.63	12.6945	up
ko04014	Ras signaling pathway	0.449418	ENSRNOG00000054371	Prkcg	K19663	EC:2.7.11.13	protein kinase C, gamma [Source:RGD Symbol;Acc:3397]	1.53377	1.93347	1.8286	3.48216	4.70262	3.15826	0.46688	-1.09888	down
ko03440	Homologous recombination	0.457704	ENSRNOG00000013148	Rad54l	K10875	EC:3.6.4.-	RAD54 like [Source:RGD Symbol;Acc:1310600]	1.13637	1.30678	1.42959	0.517076	0.534222	0.635192	2.29634	1.19933	up
ko03440	Homologous recombination	0.457704	ENSRNOG00000024420	Eme1	K10882	EC:3.1.22.-	essential meiotic structure-specific endonuclease 1 [Source:RGD Symbol;Acc:1309067]	0.547405	0.604915	0.587618	0.166858	0.159627	0.095456	4.12365	2.04392	up
ko03440	Homologous recombination	0.457704	ENSRNOG00000037302	Rad51	K04482	NA	RAD51 recombinase [Source:RGD Symbol;Acc:1563603]	2.11551	1.94133	3.48695	0.481172	0.544104	0.679288	4.42565	2.14589	up
ko03440	Homologous recombination	0.457704	ENSRNOG00000059997	Brip1	K15362	EC:3.6.4.12	BRCA1 interacting protein C-terminal helicase 1 [Source:RGD Symbol;Acc:1307659]	0.522925	0.757306	0.81892	0.184994	0.283792	0.24918	2.92375	1.54782	up
ko04926	Relaxin signaling pathway	0.462048	ENSRNOG00000003357	Col3a1	K19720	NA	collagen type III alpha 1 chain [Source:RGD Symbol;Acc:71029]	773.166	628.281	469.974	156.474	148.568	159.465	4.02884	2.01036	up
ko04926	Relaxin signaling pathway	0.462048	ENSRNOG00000003897	Col1a1	NA	NA	collagen type I alpha 1 chain [Source:RGD Symbol;Acc:61817]	330.164	210.993	127.588	21.9343	20.0594	21.0288	10.6112	3.40752	up
ko04926	Relaxin signaling pathway	0.462048	ENSRNOG00000008030	Shc2	K17447	NA	SHC adaptor protein 2 [Source:RGD Symbol;Acc:1307137]	1.08558	1.2228	0.495709	1.31078	2.86654	1.98796	0.45482	-1.13663	down
ko04926	Relaxin signaling pathway	0.462048	ENSRNOG00000011292	NEWGENE_621351	K06236	NA	collagen, type I, alpha 2 [Source:RGD Symbol;Acc:9452897]	262.119	200.003	149.732	39.3449	35.4719	44.7937	5.11539	2.35484	up
ko04926	Relaxin signaling pathway	0.462048	ENSRNOG00000016281	Col4a1	K06237	NA	collagen type IV alpha 1 chain [Source:RGD Symbol;Acc:1307148]	228.604	293.978	253.367	78.1782	93.3833	113.433	2.72268	1.44503	up
ko04926	Relaxin signaling pathway	0.462048	ENSRNOG00000016695	Mmp2	K01398	EC:3.4.24.24	matrix metallopeptidase 2 [Source:RGD Symbol;Acc:621316]	112.629	84.3299	76.9475	30.7938	26.2646	32.2348	3.06749	1.61706	up
ko04926	Relaxin signaling pathway	0.462048	ENSRNOG00000017539	Mmp9	K01403	EC:3.4.24.35	matrix metallopeptidase 9 [Source:RGD Symbol;Acc:621320]	0.708985	0.326444	0.167858	0.688657	1.06294	1.59762	0.359274	-1.47684	down
ko04926	Relaxin signaling pathway	0.462048	ENSRNOG00000023972	Col4a2	K06237	NA	collagen type IV alpha 2 chain [Source:RGD Symbol;Acc:1308085]	134.643	170.785	148.447	55.5573	64.3337	79.1798	2.27997	1.18901	up
ko04926	Relaxin signaling pathway	0.462048	ENSRNOG00000033119	Plcb4	K05858	EC:3.1.4.11	phospholipase C, beta 4 [Source:RGD Symbol;Acc:3345]	7.14989	7.94063	6.17429	13.1434	15.847	14.3553	0.490587	-1.02742	down
ko04926	Relaxin signaling pathway	0.462048	ENSRNOG00000052925	NEWGENE_621351	K06236	NA	collagen, type I, alpha 2 [Source:RGD Symbol;Acc:9452897]	98.967	66.7797	60.9449	18.46	15.0008	14.0315	4.77323	2.25497	up
ko04926	Relaxin signaling pathway	0.462048	ENSRNOG00000058039	Acta2	K12313	NA	actin alpha 2, smooth muscle [Source:RGD Symbol;Acc:621676]	251.371	255.477	327.807	74.1844	84.8511	106.259	3.14615	1.65359	up
ko04926	Relaxin signaling pathway	0.462048	ENSRNOG00000059479	Adcy1	K08041	EC:4.6.1.1	adenylate cyclase 1 [Source:RGD Symbol;Acc:1309318]	0.206208	0.356452	0.124273	1.28217	1.19576	1.45355	0.174726	-2.51683	down
ko00010	Glycolysis / Gluconeogenesis	0.473141	ENSRNOG00000002331	Aldh3a1	K00129	EC:1.2.1.5	aldehyde dehydrogenase 3 family, member A1 [Source:RGD Symbol;Acc:2088]	0.906245	1.33741	0.734843	3.9607	3.15494	3.58458	0.278359	-1.84498	down
ko00010	Glycolysis / Gluconeogenesis	0.473141	ENSRNOG00000011497	Aldh1b1	K00128	EC:1.2.1.3	aldehyde dehydrogenase 1 family, member B1 [Source:RGD Symbol;Acc:1306737]	0.047646	0.082567	0.020813	0	0	0	503.42	8.97562	up
ko00010	Glycolysis / Gluconeogenesis	0.473141	ENSRNOG00000013141	Eno2	K01689	EC:4.2.1.11	gamma-enolase-like [Source:RGD Symbol;Acc:6491529]	2.55255	2.89558	2.26483	1.11867	0.817755	0.804133	2.81437	1.49281	up
ko00010	Glycolysis / Gluconeogenesis	0.473141	ENSRNOG00000017597	Fbp1	K03841	EC:3.1.3.11	fructose-bisphosphatase 1 [Source:RGD Symbol;Acc:2595]	0.440079	0.319562	0.185471	2.73069	2.42502	2.11469	0.129995	-2.94348	down
ko00010	Glycolysis / Gluconeogenesis	0.473141	ENSRNOG00000032959	Adh7	K13951	EC:1.1.1.1	alcohol dehydrogenase 7 (class IV), mu or sigma polypeptide [Source:RGD Symbol;Acc:621638]	2.43511	3.44985	1.51791	5.94367	5.77427	4.45965	0.457601	-1.12784	down
ko00010	Glycolysis / Gluconeogenesis	0.473141	ENSRNOG00000048365	LOC100911625	K01689	EC:4.2.1.11	enolase 2 [Source:RGD Symbol;Acc:2554]	2.21087	1.87376	2.13235	0.93404	0.804823	1.26914	2.06681	1.04741	up
ko04216	Ferroptosis	0.477713	ENSRNOG00000010210	Slc7a11	K13869	NA	solute carrier family 7 member 11 [Source:RGD Symbol;Acc:1309275]	0.785658	0.686638	0.778759	0.156645	0.128973	0.154433	5.11544	2.35486	up
ko04216	Ferroptosis	0.477713	ENSRNOG00000014117	Hmox1	K00510	EC:1.14.14.18	heme oxygenase 1 [Source:RGD Symbol;Acc:2806]	551.077	151.281	396.168	28.4904	25.1169	27.1124	13.6091	3.7665	up
ko04216	Ferroptosis	0.477713	ENSRNOG00000031506	Ftl1	K13625	NA	ferritin light chain 1 [Source:RGD Symbol;Acc:61813]	78.8034	54.0738	79.2597	41.1022	31.807	30.2894	2.05562	1.03957	up
ko04216	Ferroptosis	0.477713	ENSRNOG00000049471	Steap3	K10142	EC:1.16.1.-	STEAP3 metalloreductase [Source:RGD Symbol;Acc:708552]	4.4521	4.15233	4.89617	1.30142	1.31299	1.27142	3.47431	1.79673	up
ko04925	Aldosterone synthesis and secretion	0.480045	ENSRNOG00000000428	Cyp21a1	K00513	EC:1.14.14.16	cytochrome P450, family 21, subfamily a, polypeptide 1 [Source:RGD Symbol;Acc:2461]	0.80946	0.470778	1.08384	0.346546	0.383179	0.114351	2.80079	1.48583	up
ko04925	Aldosterone synthesis and secretion	0.480045	ENSRNOG00000007290	Atp1a2	K01539	EC:7.2.2.13	ATPase Na+/K+ transporting subunit alpha 2 [Source:RGD Symbol;Acc:2168]	1.11361	2.2107	0.439613	6.71531	7.20043	7.69308	0.174185	-2.52131	down
ko04925	Aldosterone synthesis and secretion	0.480045	ENSRNOG00000015603	Prkce	NA	NA	protein kinase C, epsilon [Source:RGD Symbol;Acc:61925]	7.93806	8.81436	6.50926	11.1812	15.7408	20.6574	0.488903	-1.03238	down
ko04925	Aldosterone synthesis and secretion	0.480045	ENSRNOG00000018712	Camk2a	K04515	EC:2.7.11.17	calcium/calmodulin-dependent protein kinase II alpha [Source:RGD Symbol;Acc:2261]	0.637376	1.01802	0.591485	1.83401	1.77662	1.39807	0.448596	-1.15651	down
ko04925	Aldosterone synthesis and secretion	0.480045	ENSRNOG00000019560	Pde2a	K18283	EC:3.1.4.17	phosphodiesterase 2A [Source:RGD Symbol;Acc:620965]	4.49349	5.63086	3.16365	7.51152	9.28259	10.7771	0.481952	-1.05304	down
ko04925	Aldosterone synthesis and secretion	0.480045	ENSRNOG00000030269	Atp2b2	K05850	EC:7.2.2.10	ATPase plasma membrane Ca2+ transporting 2 [Source:RGD Symbol;Acc:2176]	0.0144165	0.0177611	0.0181006	0.0829795	0.0884165	0.0269138	0.253534	-1.97975	down
ko04925	Aldosterone synthesis and secretion	0.480045	ENSRNOG00000033119	Plcb4	K05858	EC:3.1.4.11	phospholipase C, beta 4 [Source:RGD Symbol;Acc:3345]	7.14989	7.94063	6.17429	13.1434	15.847	14.3553	0.490587	-1.02742	down
ko04925	Aldosterone synthesis and secretion	0.480045	ENSRNOG00000054371	Prkcg	K19663	EC:2.7.11.13	protein kinase C, gamma [Source:RGD Symbol;Acc:3397]	1.53377	1.93347	1.8286	3.48216	4.70262	3.15826	0.46688	-1.09888	down
ko04925	Aldosterone synthesis and secretion	0.480045	ENSRNOG00000059479	Adcy1	K08041	EC:4.6.1.1	adenylate cyclase 1 [Source:RGD Symbol;Acc:1309318]	0.206208	0.356452	0.124273	1.28217	1.19576	1.45355	0.174726	-2.51683	down
ko00360	Phenylalanine metabolism	0.481986	ENSRNOG00000002331	Aldh3a1	K00129	EC:1.2.1.5	aldehyde dehydrogenase 3 family, member A1 [Source:RGD Symbol;Acc:2088]	0.906245	1.33741	0.734843	3.9607	3.15494	3.58458	0.278359	-1.84498	down
ko00360	Phenylalanine metabolism	0.481986	ENSRNOG00000043116	RGD1308564	K03334	EC:1.4.3.2	similar to L-amino acid oxidase 1 [Source:RGD Symbol;Acc:1308564]	0.026424	0	0	0.340514	0.096658	0.17216	0.0433655	-4.52731	down
ko04810	Regulation of actin cytoskeleton	0.495809	ENSRNOG00000002244	Pdgfra	K04363	EC:2.7.10.1	platelet derived growth factor receptor alpha [Source:RGD Symbol;Acc:3284]	10.7913	10.4928	10.1398	22.5292	21.8926	24.1598	0.458196	-1.12596	down
ko04810	Regulation of actin cytoskeleton	0.495809	ENSRNOG00000004488	Bdkrb1	K03915	NA	bradykinin receptor B1 [Source:RGD Symbol;Acc:620401]	0.213898	0.179507	1.7444	0	0.153112	0.038042	11.1837	3.48332	up
ko04810	Regulation of actin cytoskeleton	0.495809	ENSRNOG00000006569	Itgb8	K06591	NA	integrin subunit beta 8 [Source:RGD Symbol;Acc:1311374]	2.69064	1.81036	3.42008	1.06221	1.22856	0.71459	2.63565	1.39816	up
ko04810	Regulation of actin cytoskeleton	0.495809	ENSRNOG00000006723	Itga11	K06587	NA	integrin subunit alpha 11 [Source:RGD Symbol;Acc:1311711]	2.02577	0.948998	1.43154	0.445333	0.566447	0.898136	2.30707	1.20606	up
ko04810	Regulation of actin cytoskeleton	0.495809	ENSRNOG00000008986	Diaph3	K05745	NA	diaphanous-related formin 3 [Source:RGD Symbol;Acc:1593287]	1.74749	1.44078	2.10909	0.42475	0.542476	0.567089	3.45259	1.78768	up
ko04810	Regulation of actin cytoskeleton	0.495809	ENSRNOG00000014288	Fn1	K05717	NA	fibronectin 1 [Source:RGD Symbol;Acc:2624]	280.945	248.379	229.735	57.4707	64.5711	77.3481	3.80691	1.92862	up
ko04810	Regulation of actin cytoskeleton	0.495809	ENSRNOG00000014409	Myl7	K12754	NA	myosin light chain 7 [Source:RGD Symbol;Acc:1308262]	0.119219	0.0167495	0.0100427	5.72545	0.117447	1.76474	0.0191928	-5.70329	down
ko04810	Regulation of actin cytoskeleton	0.495809	ENSRNOG00000017645	Mylpf	K12758	NA	myosin light chain, phosphorylatable, fast skeletal muscle [Source:RGD Symbol;Acc:3141]	2.23646	2.79222	1.58914	5.37923	8.99875	4.30547	0.354207	-1.49733	down
ko04810	Regulation of actin cytoskeleton	0.495809	ENSRNOG00000018461	Pdgfrb	NA	NA	platelet derived growth factor receptor beta [Source:RGD Symbol;Acc:3285]	29.9477	33.1625	27.8463	12.2108	11.6934	13.6546	2.42171	1.27603	up
ko04810	Regulation of actin cytoskeleton	0.495809	ENSRNOG00000018991	Gsn	K05768	NA	gelsolin [Source:RGD Symbol;Acc:1303089]	421.812	450.543	281.254	1095.5	923.271	1115.79	0.368029	-1.44211	down
ko04810	Regulation of actin cytoskeleton	0.495809	ENSRNOG00000020246	Myl9	K12755	NA	myosin light chain 9 [Source:RGD Symbol;Acc:1311235]	135.556	142.75	155.595	45.8177	50.7849	52.6763	2.90665	1.53936	up
ko04810	Regulation of actin cytoskeleton	0.495809	ENSRNOG00000021569	Tiam1	K05731	NA	T-cell lymphoma invasion and metastasis 1 [Source:RGD Symbol;Acc:1307455]	2.12158	2.24547	1.49218	0.584266	1.21954	1.06253	2.04415	1.0315	up
ko04810	Regulation of actin cytoskeleton	0.495809	ENSRNOG00000027894	Iqgap3	K05767	NA	IQ motif containing GTPase activating protein 3 [Source:RGD Symbol;Acc:1305951]	2.93717	2.81902	3.35137	0.84469	1.39949	1.21428	2.63342	1.39694	up
ko04810	Regulation of actin cytoskeleton	0.495809	ENSRNOG00000030387	Kng1	K03898	NA	kininogen 1 [Source:RGD Symbol;Acc:1359376]	21.2306	13.4328	16.0391	1.66566	2.34674	4.32674	6.08007	2.60409	up
ko04810	Regulation of actin cytoskeleton	0.495809	ENSRNOG00000047476	Wasf1	K05753	NA	WASP family member 1 [Source:RGD Symbol;Acc:1561954]	0.233252	0.315098	0.44101	0.118389	0.035382	0.132219	3.45942	1.79053	up
ko04810	Regulation of actin cytoskeleton	0.495809	ENSRNOG00000051964	LOC108348190	K04357	NA	uncharacterized LOC108348190 [Source:RGD Symbol;Acc:11520363]	0.212498	0.315292	0.147029	0.358931	0.514377	0.568232	0.468124	-1.09504	down
ko04810	Regulation of actin cytoskeleton	0.495809	ENSRNOG00000052205	Fgf23	K22428	NA	fibroblast growth factor 23 [Source:RGD Symbol;Acc:620178]	0.318321	0.976255	0.694014	0	0	0	6628.63	12.6945	up
ko04810	Regulation of actin cytoskeleton	0.495809	ENSRNOG00000056756	Actn1	K05699	NA	actinin, alpha 1 [Source:RGD Symbol;Acc:70907]	53.4333	54.3079	64.5786	24.6416	28.3915	29.6839	2.08324	1.05883	up
ko04810	Regulation of actin cytoskeleton	0.495809	ENSRNOG00000058111	Itga2	K06481	NA	integrin subunit alpha 2 [Source:RGD Symbol;Acc:621632]	2.02287	2.41017	1.73864	0.541871	0.886078	0.645843	2.97604	1.57339	up
ko00220	Arginine biosynthesis	0.511206	ENSRNOG00000013304	Arg1	K01476	EC:3.5.3.1	arginase 1 [Source:RGD Symbol;Acc:2150]	38.2968	26.0177	49.9768	14.1945	11.7175	9.74681	3.20513	1.68038	up
ko00220	Arginine biosynthesis	0.511206	ENSRNOG00000033915	Gpt	K00814	EC:2.6.1.2	glutamic--pyruvic transaminase [Source:RGD Symbol;Acc:621720]	25.0277	22.9063	27.1695	56.5881	55.0764	53.6412	0.454331	-1.13819	down
ko05226	Gastric cancer	0.513344	ENSRNOG00000000521	Cdkn1a	K06625	NA	cyclin-dependent kinase inhibitor 1A [Source:RGD Symbol;Acc:69328]	60.966	98.6015	55.2437	36.6148	37.2161	27.4646	2.12064	1.0845	up
ko05226	Gastric cancer	0.513344	ENSRNOG00000002418	Tgfb2	K13376	NA	transforming growth factor, beta 2 [Source:RGD Symbol;Acc:70491]	32.2616	34.4352	34.8496	12.3645	10.9716	12.4504	2.83756	1.50465	up
ko05226	Gastric cancer	0.513344	ENSRNOG00000008012	Abcb4	K05658;K05659	EC:7.6.2.2	ATP binding cassette subfamily B member 1A [Source:RGD Symbol;Acc:619951]	3.31043	3.55892	2.92492	5.5518	10.3897	15.0847	0.315677	-1.66348	down
ko05226	Gastric cancer	0.513344	ENSRNOG00000008030	Shc2	K17447	NA	SHC adaptor protein 2 [Source:RGD Symbol;Acc:1307137]	1.08558	1.2228	0.495709	1.31078	2.86654	1.98796	0.45482	-1.13663	down
ko05226	Gastric cancer	0.513344	ENSRNOG00000009867	Tgfb3	K13377	NA	transforming growth factor, beta 3 [Source:RGD Symbol;Acc:3851]	28.04	20.6768	22.6266	8.0599	7.08636	6.45932	3.30208	1.72338	up
ko05226	Gastric cancer	0.513344	ENSRNOG00000014385	Wnt2b	K00182	NA	Wnt family member 2B [Source:RGD Symbol;Acc:69346]	1.93844	1.91525	1.50408	7.62981	5.39889	3.48382	0.324467	-1.62386	down
ko05226	Gastric cancer	0.513344	ENSRNOG00000014786	Ccne1	K06626	NA	cyclin E1 [Source:RGD Symbol;Acc:2294]	1.62725	1.32867	1.53513	0.320929	0.475594	0.655549	3.09286	1.62894	up
ko05226	Gastric cancer	0.513344	ENSRNOG00000015562	Cdh17	K06811	NA	cadherin 17 [Source:RGD Symbol;Acc:619748]	1.36051	1.62806	1.03261	0.423343	0.744103	0.576678	2.30556	1.20512	up
ko05226	Gastric cancer	0.513344	ENSRNOG00000015618	Wnt5a	K00444	NA	Wnt family member 5A [Source:RGD Symbol;Acc:69250]	7.40085	6.90616	6.99221	3.0348	2.5955	2.2052	2.7183	1.4427	up
ko05226	Gastric cancer	0.513344	ENSRNOG00000015750	Wnt7b	K00572	NA	Wnt family member 7B [Source:RGD Symbol;Acc:1311441]	1.76975	1.41713	2.20033	0.207026	0.670733	0.684039	3.44937	1.78633	up
ko05226	Gastric cancer	0.513344	ENSRNOG00000022784	Fzd10	K02842	NA	frizzled class receptor 10 [Source:RGD Symbol;Acc:1583825]	0.099555	0.232361	0.089789	0.016885	0.017521	0.023113	7.33158	2.87412	up
ko05226	Gastric cancer	0.513344	ENSRNOG00000051964	LOC108348190	K04357	NA	uncharacterized LOC108348190 [Source:RGD Symbol;Acc:11520363]	0.212498	0.315292	0.147029	0.358931	0.514377	0.568232	0.468124	-1.09504	down
ko05226	Gastric cancer	0.513344	ENSRNOG00000052205	Fgf23	K22428	NA	fibroblast growth factor 23 [Source:RGD Symbol;Acc:620178]	0.318321	0.976255	0.694014	0	0	0	6628.63	12.6945	up
ko04914	Progesterone-mediated oocyte maturation	0.52312	ENSRNOG00000000632	Cdk1	K02087	2.7.11.23;EC:2.7.11.22	cyclin-dependent kinase 1 [Source:RGD Symbol;Acc:2319]	13.2074	15.3817	18.7413	2.64068	4.12548	3.85137	4.45776	2.15632	up
ko04914	Progesterone-mediated oocyte maturation	0.52312	ENSRNOG00000015423	Ccna2	K06627	NA	cyclin A2 [Source:RGD Symbol;Acc:621059]	6.5068	6.18522	6.15328	1.41045	1.83379	1.7034	3.80895	1.92939	up
ko04914	Progesterone-mediated oocyte maturation	0.52312	ENSRNOG00000018815	Plk1	K06631	EC:2.7.11.21	polo-like kinase 1 [Source:RGD Symbol;Acc:3352]	4.81308	4.27321	4.3835	1.00901	1.56844	1.31794	3.45788	1.78989	up
ko04914	Progesterone-mediated oocyte maturation	0.52312	ENSRNOG00000020281	Kif22	K10403	NA	kinesin family member 22 [Source:RGD Symbol;Acc:1311886]	6.55774	5.63504	6.22027	1.5728	2.47765	2.57203	2.78039	1.47529	up
ko04914	Progesterone-mediated oocyte maturation	0.52312	ENSRNOG00000032778	Bub1	K02178	EC:2.7.11.1	BUB1 mitotic checkpoint serine/threonine kinase [Source:RGD Symbol;Acc:1311707]	4.4385	4.93863	4.9439	1.72613	2.05124	1.64995	2.6387	1.39983	up
ko04914	Progesterone-mediated oocyte maturation	0.52312	ENSRNOG00000055111	AABR07000658	K21770	NA	cyclin B2-like [Source:NCBI gene;Acc:100364016]	5.51022	5.51102	6.25636	0.973042	1.20114	1.81881	4.32698	2.11336	up
ko04914	Progesterone-mediated oocyte maturation	0.52312	ENSRNOG00000058539	Ccnb1	K05868	NA	cyclin B1 [Source:RGD Symbol;Acc:2291]	6.84248	5.36905	7.00748	1.32879	2.37311	1.92021	3.41846	1.77335	up
ko04914	Progesterone-mediated oocyte maturation	0.52312	ENSRNOG00000059479	Adcy1	K08041	EC:4.6.1.1	adenylate cyclase 1 [Source:RGD Symbol;Acc:1309318]	0.206208	0.356452	0.124273	1.28217	1.19576	1.45355	0.174726	-2.51683	down
ko01523	Antifolate resistance	0.525781	ENSRNOG00000010278	Il6	K05405	NA	interleukin 6 [Source:RGD Symbol;Acc:2901]	3.16485	2.11915	11.0231	0.116354	0.115796	0.224046	35.7458	5.1597	up
ko01523	Antifolate resistance	0.525781	ENSRNOG00000013521	Dhfr	K00287	EC:1.5.1.3	dihydrofolate reductase [Source:RGD Symbol;Acc:2500]	4.22122	4.13326	5.03549	1.95547	2.08985	2.19484	2.14577	1.1015	up
ko01523	Antifolate resistance	0.525781	ENSRNOG00000019890	Folr2	K13649	NA	folate receptor beta [Source:RGD Symbol;Acc:1308515]	19.4599	17.9835	15.3275	5.46714	3.46152	5.18278	3.73958	1.90288	up
ko04145	Phagosome	0.526165	ENSRNOG00000008310	Mpo	K10789	EC:1.11.2.2	myeloperoxidase [Source:RGD Symbol;Acc:1592081]	0.0178849	0	0.0336242	0.108739	0.193909	0.202207	0.102027	-3.29297	down
ko04145	Phagosome	0.526165	ENSRNOG00000010529	Thbs2	K04659	NA	thrombospondin 2 [Source:RGD Symbol;Acc:1310979]	16.9175	9.7328	15.9974	0.842375	0.59486	0.649489	20.4376	4.35316	up
ko04145	Phagosome	0.526165	ENSRNOG00000011706	Mbl1	K03991	NA	mannose-binding lectin (protein A) 1 [Source:RGD Symbol;Acc:3055]	2.56921	3.06382	2.73128	0.495776	1.10101	0.920711	3.32248	1.73226	up
ko04145	Phagosome	0.526165	ENSRNOG00000011796	C1r	K01330	EC:3.4.21.41	complement C1r [Source:RGD Symbol;Acc:1309091]	123.094	95.9083	133.697	50.3805	41.8088	43.88	2.59206	1.3741	up
ko04145	Phagosome	0.526165	ENSRNOG00000017209	Tubb3	K07375	NA	tubulin, beta 3 class III [Source:RGD Symbol;Acc:628595]	2.15739	1.01563	1.76687	0.172949	0.141911	0.209047	9.42893	3.23709	up
ko04145	Phagosome	0.526165	ENSRNOG00000018371	Tubb6	K07375	NA	tubulin, beta 6 class V [Source:RGD Symbol;Acc:1305887]	51.3781	46.6999	62.9911	21.832	20.597	17.835	2.67272	1.41831	up
ko04145	Phagosome	0.526165	ENSRNOG00000027855	Fcar	K06513	NA	Fc fragment of IgA receptor [Source:RGD Symbol;Acc:1303082]	0.616979	0.670065	0.480905	1.05645	0.909993	1.64307	0.489803	-1.02973	down
ko04145	Phagosome	0.526165	ENSRNOG00000039754	Rab7b	K07898	NA	Rab7b, member RAS oncogene family [Source:RGD Symbol;Acc:1562617]	9.57892	7.52233	6.4956	3.07597	2.14929	2.00511	3.26357	1.70645	up
ko04145	Phagosome	0.526165	ENSRNOG00000042795	RGD1564571	K06563	NA	similar to DC-SIGN [Source:RGD Symbol;Acc:1564571]	0.800357	0.066523	0.06648	0	0.040751	0	22.904	4.51753	up
ko04145	Phagosome	0.526165	ENSRNOG00000045829	Thbs1	K16857	NA	thrombospondin 1 [Source:RGD Symbol;Acc:1588455]	69.4641	106.372	164.303	19.9347	19.858	26.7682	5.11019	2.35338	up
ko04145	Phagosome	0.526165	ENSRNOG00000046151	Tubb1	K07375	NA	tubulin, beta 1 class VI [Source:RGD Symbol;Acc:1589557]	0.11415	0.15751	0.218594	0.872419	0.813423	0.783425	0.198542	-2.33248	down
ko04145	Phagosome	0.526165	ENSRNOG00000047864	LOC108348072	K06752	NA	RT1 class II, locus DMa [Source:RGD Symbol;Acc:735053]	18.1206	19.1445	16.0483	10.0005	6.31184	7.37897	2.25034	1.17014	up
ko04145	Phagosome	0.526165	ENSRNOG00000048169	Tuba8	K07374	NA	tubulin, alpha 8 [Source:RGD Symbol;Acc:1566041]	3.55351	3.77764	3.98149	0.363944	0.114367	0.307022	14.4049	3.84849	up
ko04145	Phagosome	0.526165	ENSRNOG00000049303	Marco	K13884	NA	macrophage receptor with collagenous structure [Source:RGD Symbol;Acc:1589662]	0.632275	0.603204	0.631253	0	0	0	6222.44	12.6033	up
ko04145	Phagosome	0.526165	ENSRNOG00000058111	Itga2	K06481	NA	integrin subunit alpha 2 [Source:RGD Symbol;Acc:621632]	2.02287	2.41017	1.73864	0.541871	0.886078	0.645843	2.97604	1.57339	up
ko04210	Apoptosis	0.527889	ENSRNOG00000000187	Csf2rb	K04738	NA	colony stimulating factor 2 receptor beta common subunit [Source:RGD Symbol;Acc:620189]	18.4435	13.9751	14.6689	8.13905	5.53808	7.54263	2.21904	1.14993	up
ko04210	Apoptosis	0.527889	ENSRNOG00000000562	Prf1	K07818	NA	perforin 1 [Source:RGD Symbol;Acc:708463]	8.20777	9.31399	3.00773	32.4085	55.6601	39.4225	0.161027	-2.63463	down
ko04210	Apoptosis	0.527889	ENSRNOG00000002978	Faslg	K04389	NA	Fas ligand [Source:RGD Symbol;Acc:3880]	0.816894	1.01133	0.807977	3.43662	5.79528	3.71874	0.203558	-2.29649	down
ko04210	Apoptosis	0.527889	ENSRNOG00000013953	Ntrk1	K03176	EC:2.7.10.1	neurotrophic receptor tyrosine kinase 1 [Source:RGD Symbol;Acc:620144]	0.089799	0.0959429	0.0319835	0.269543	0.411822	0.210092	0.244236	-2.03366	down
ko04210	Apoptosis	0.527889	ENSRNOG00000014064	Ctsh	K01366	EC:3.4.22.16	cathepsin H [Source:RGD Symbol;Acc:2447]	939.712	762.607	773.915	433.187	408.244	355.294	2.06918	1.04906	up
ko04210	Apoptosis	0.527889	ENSRNOG00000016571	Ngf	K02582	NA	nerve growth factor [Source:RGD Symbol;Acc:1598328]	0.683532	0.348949	0.591755	0.156563	0.22621	0.0462036	3.78631	1.92079	up
ko04210	Apoptosis	0.527889	ENSRNOG00000021155	Ctsk	NA	NA	cathepsin K [Source:RGD Symbol;Acc:61810]	41.0334	42.676	29.5982	11.0648	7.58504	6.87196	4.43964	2.15044	up
ko04210	Apoptosis	0.527889	ENSRNOG00000027096	Ctsw	K08569	EC:3.4.22.-	cathepsin W [Source:RGD Symbol;Acc:1309354]	2.08638	3.55784	0.820635	5.92082	7.85561	4.04858	0.362685	-1.46321	down
ko04210	Apoptosis	0.527889	ENSRNOG00000045973	Gzmb	K01353	EC:3.4.21.79	granzyme B [Source:RGD Symbol;Acc:620018]	1.2569	2.48146	1.0418	7.67971	19.0044	10.3411	0.129105	-2.95338	down
ko04210	Apoptosis	0.527889	ENSRNOG00000048169	Tuba8	K07374	NA	tubulin, alpha 8 [Source:RGD Symbol;Acc:1566041]	3.55351	3.77764	3.98149	0.363944	0.114367	0.307022	14.4049	3.84849	up
ko04210	Apoptosis	0.527889	ENSRNOG00000049976	Gzmbl2	K01353	EC:3.4.21.79	Granzyme B-like 2 [Source:RGD Symbol;Acc:2320097]	2.02426	2.40992	1.11774	7.66841	9.94887	9.79654	0.202523	-2.30384	down
ko04210	Apoptosis	0.527889	ENSRNOG00000050819	Birc5	K08731	NA	baculoviral IAP repeat-containing 5 [Source:RGD Symbol;Acc:70499]	6.52015	7.59906	9.03216	1.48435	2.46768	2.33775	3.68079	1.88002	up
ko04672	Intestinal immune network for IgA production	0.535861	ENSRNOG00000006311	Ccr9	K04184	NA	C-C motif chemokine receptor 9 [Source:RGD Symbol;Acc:628750]	0.257415	0.243861	0.157072	0.830937	1.15195	0.453854	0.270175	-1.88803	down
ko04672	Intestinal immune network for IgA production	0.535861	ENSRNOG00000007664	Tnfrsf13c	K05151	NA	TNF receptor superfamily member 13C [Source:RGD Symbol;Acc:1560810]	0.348704	0.346682	0.160939	0.424374	1.26822	0.783325	0.345861	-1.53174	down
ko04672	Intestinal immune network for IgA production	0.535861	ENSRNOG00000010278	Il6	K05405	NA	interleukin 6 [Source:RGD Symbol;Acc:2901]	3.16485	2.11915	11.0231	0.116354	0.115796	0.224046	35.7458	5.1597	up
ko04672	Intestinal immune network for IgA production	0.535861	ENSRNOG00000047864	LOC108348072	K06752	NA	RT1 class II, locus DMa [Source:RGD Symbol;Acc:735053]	18.1206	19.1445	16.0483	10.0005	6.31184	7.37897	2.25034	1.17014	up
ko00040	Pentose and glucuronate interconversions	0.539321	ENSRNOG00000001092	Kl	K14756	EC:3.2.1.31	Klotho [Source:RGD Symbol;Acc:620396]	2.60662	5.62618	3.57293	8.08057	8.68837	10.3107	0.435964	-1.19772	down
ko00040	Pentose and glucuronate interconversions	0.539321	ENSRNOG00000009734	Akr1b8	K00011	EC:1.1.1.21	aldo-keto reductase family 1 member B10 [Source:RGD Symbol;Acc:1308277]	4.64044	3.49528	4.00072	1.64368	1.29778	1.50315	2.7306	1.44922	up
ko04742	Taste transduction	0.550772	ENSRNOG00000005007	Scn3a	K04836	NA	sodium voltage-gated channel alpha subunit 3 [Source:RGD Symbol;Acc:3635]	0.349693	0.376685	0.255447	0.0940699	0.0904227	0.113441	3.29544	1.72047	up
ko04742	Taste transduction	0.550772	ENSRNOG00000005268	Gnat3	K19729	NA	G protein subunit alpha transducin 3 [Source:RGD Symbol;Acc:727817]	0.143415	0.596609	0.268835	1.06101	0.850564	1.51812	0.294154	-1.76536	down
ko04742	Taste transduction	0.550772	ENSRNOG00000014290	Grm1	K04603	NA	glutamate metabotropic receptor 1 [Source:RGD Symbol;Acc:2742]	0.009912	0	0.015688	0.069331	0.104979	0.0226431	0.12998	-2.94364	down
ko04742	Taste transduction	0.550772	ENSRNOG00000019368	Scnn1a	K04824	NA	sodium channel epithelial 1 alpha subunit [Source:RGD Symbol;Acc:3639]	58.4143	57.3811	52.8678	132.105	161.056	139.405	0.389913	-1.35878	down
ko04742	Taste transduction	0.550772	ENSRNOG00000020484	Trpm5	K04980	NA	transient receptor potential cation channel, subfamily M, member 5 [Source:RGD Symbol;Acc:1310620]	0.828644	2.4085	1.50249	5.99927	5.86911	10.0597	0.216144	-2.20993	down
ko04742	Taste transduction	0.550772	ENSRNOG00000054212	Pde1a	K13755	EC:3.1.4.17	phosphodiesterase 1A [Source:RGD Symbol;Acc:68329]	2.47149	1.9009	2.38077	0.828064	0.871072	1.06546	2.44273	1.28849	up
ko00071	Fatty acid degradation	0.554514	ENSRNOG00000009597	Cyp4a1	K07425	EC:1.14.14.80	cytochrome P450, family 4, subfamily a, polypeptide 1 [Source:RGD Symbol;Acc:68945]	0.15917	0.263654	0.0812323	0.543618	0.850142	0.365403	0.286531	-1.80323	down
ko00071	Fatty acid degradation	0.554514	ENSRNOG00000011497	Aldh1b1	K00128	EC:1.2.1.3	aldehyde dehydrogenase 1 family, member B1 [Source:RGD Symbol;Acc:1306737]	0.047646	0.082567	0.020813	0	0	0	503.42	8.97562	up
ko00071	Fatty acid degradation	0.554514	ENSRNOG00000019189	Acat2	K00626	EC:2.3.1.9	acetyl-CoA acetyltransferase 2 [Source:RGD Symbol;Acc:1359366]	7.37918	6.24791	9.42248	2.62881	2.58117	2.8686	2.85317	1.51257	up
ko00071	Fatty acid degradation	0.554514	ENSRNOG00000032959	Adh7	K13951	EC:1.1.1.1	alcohol dehydrogenase 7 (class IV), mu or sigma polypeptide [Source:RGD Symbol;Acc:621638]	2.43511	3.44985	1.51791	5.94367	5.77427	4.45965	0.457601	-1.12784	down
ko01521	EGFR tyrosine kinase inhibitor resistance	0.556846	ENSRNOG00000002244	Pdgfra	K04363	EC:2.7.10.1	platelet derived growth factor receptor alpha [Source:RGD Symbol;Acc:3284]	10.7913	10.4928	10.1398	22.5292	21.8926	24.1598	0.458196	-1.12596	down
ko01521	EGFR tyrosine kinase inhibitor resistance	0.556846	ENSRNOG00000008030	Shc2	K17447	NA	SHC adaptor protein 2 [Source:RGD Symbol;Acc:1307137]	1.08558	1.2228	0.495709	1.31078	2.86654	1.98796	0.45482	-1.13663	down
ko01521	EGFR tyrosine kinase inhibitor resistance	0.556846	ENSRNOG00000010278	Il6	K05405	NA	interleukin 6 [Source:RGD Symbol;Acc:2901]	3.16485	2.11915	11.0231	0.116354	0.115796	0.224046	35.7458	5.1597	up
ko01521	EGFR tyrosine kinase inhibitor resistance	0.556846	ENSRNOG00000018461	Pdgfrb	NA	NA	platelet derived growth factor receptor beta [Source:RGD Symbol;Acc:3285]	29.9477	33.1625	27.8463	12.2108	11.6934	13.6546	2.42171	1.27603	up
ko01521	EGFR tyrosine kinase inhibitor resistance	0.556846	ENSRNOG00000051964	LOC108348190	K04357	NA	uncharacterized LOC108348190 [Source:RGD Symbol;Acc:11520363]	0.212498	0.315292	0.147029	0.358931	0.514377	0.568232	0.468124	-1.09504	down
ko01521	EGFR tyrosine kinase inhibitor resistance	0.556846	ENSRNOG00000051986	Plcg2	NA	NA	phospholipase C, gamma 2 [Source:RGD Symbol;Acc:3348]	5.19104	6.76231	4.63746	12.3585	15.9316	15.9714	0.374836	-1.41567	down
ko01521	EGFR tyrosine kinase inhibitor resistance	0.556846	ENSRNOG00000054371	Prkcg	K19663	EC:2.7.11.13	protein kinase C, gamma [Source:RGD Symbol;Acc:3397]	1.53377	1.93347	1.8286	3.48216	4.70262	3.15826	0.46688	-1.09888	down
ko04371	Apelin signaling pathway	0.559889	ENSRNOG00000001414	Serpine1	NA	NA	serpin family E member 1 [Source:RGD Symbol;Acc:3249]	55.409	67.7847	164.683	7.58747	10.5169	14.5605	8.81302	3.13964	up
ko04371	Apelin signaling pathway	0.559889	ENSRNOG00000001492	Slc8a2	K05849	NA	solute carrier family 8 member A2 [Source:RGD Symbol;Acc:620194]	0.233813	0.256782	0.262259	0.0343693	0.0610045	0.134155	3.28	1.7137	up
ko04371	Apelin signaling pathway	0.559889	ENSRNOG00000004473	Ppargc1a	K07202	NA	PPARG coactivator 1 alpha [Source:RGD Symbol;Acc:620925]	0.699099	0.733841	0.380414	1.49528	2.21646	2.7585	0.280261	-1.83516	down
ko04371	Apelin signaling pathway	0.559889	ENSRNOG00000006645	Ryr3	K04963	NA	ryanodine receptor 3 [Source:RGD Symbol;Acc:68952]	0.552848	0.70992	0.557857	1.46945	1.2114	2.06304	0.383784	-1.38163	down
ko04371	Apelin signaling pathway	0.559889	ENSRNOG00000015036	Ccn2	K06827	NA	cellular communication network factor 2 [Source:RGD Symbol;Acc:621392]	218.744	343.767	345.238	124.994	151.721	144.012	2.15757	1.10941	up
ko04371	Apelin signaling pathway	0.559889	ENSRNOG00000015603	Prkce	NA	NA	protein kinase C, epsilon [Source:RGD Symbol;Acc:61925]	7.93806	8.81436	6.50926	11.1812	15.7408	20.6574	0.488903	-1.03238	down
ko04371	Apelin signaling pathway	0.559889	ENSRNOG00000020557	Ryr1	K04961	NA	ryanodine receptor 1 [Source:RGD Symbol;Acc:1586637]	0.0419302	0.0748344	0.0894049	0.149468	0.126131	0.169126	0.463588	-1.10908	down
ko04371	Apelin signaling pathway	0.559889	ENSRNOG00000033119	Plcb4	K05858	EC:3.1.4.11	phospholipase C, beta 4 [Source:RGD Symbol;Acc:3345]	7.14989	7.94063	6.17429	13.1434	15.847	14.3553	0.490587	-1.02742	down
ko04371	Apelin signaling pathway	0.559889	ENSRNOG00000043451	Spp1	K06250	NA	secreted phosphoprotein 1 [Source:RGD Symbol;Acc:3752]	129.555	106.043	88.3967	9.8296	1.21233	1.83191	25.1669	4.65346	up
ko04371	Apelin signaling pathway	0.559889	ENSRNOG00000050675	Myl4	K12750	NA	myosin, light chain 4 [Source:RGD Symbol;Acc:1591197]	0.719864	0.702105	0.524042	7.65628	0.763299	3.20716	0.167374	-2.57885	down
ko04371	Apelin signaling pathway	0.559889	ENSRNOG00000058039	Acta2	K12313	NA	actin alpha 2, smooth muscle [Source:RGD Symbol;Acc:621676]	251.371	255.477	327.807	74.1844	84.8511	106.259	3.14615	1.65359	up
ko04371	Apelin signaling pathway	0.559889	ENSRNOG00000059479	Adcy1	K08041	EC:4.6.1.1	adenylate cyclase 1 [Source:RGD Symbol;Acc:1309318]	0.206208	0.356452	0.124273	1.28217	1.19576	1.45355	0.174726	-2.51683	down
ko04064	NF-kappa B signaling pathway	0.562349	ENSRNOG00000002525	Ptgs2	NA	NA	prostaglandin-endoperoxide synthase 2 [Source:RGD Symbol;Acc:620349]	1.16561	3.47891	3.42764	1.65163	1.08205	1.05589	2.1301	1.09092	up
ko04064	NF-kappa B signaling pathway	0.562349	ENSRNOG00000007664	Tnfrsf13c	K05151	NA	TNF receptor superfamily member 13C [Source:RGD Symbol;Acc:1560810]	0.348704	0.346682	0.160939	0.424374	1.26822	0.783325	0.345861	-1.53174	down
ko04064	NF-kappa B signaling pathway	0.562349	ENSRNOG00000009705	Lck	K05856	EC:2.7.10.2	LCK proto-oncogene, Src family tyrosine kinase [Source:RGD Symbol;Acc:2994]	6.96253	7.70444	4.6759	11.8213	21.1914	13.3951	0.416803	-1.26256	down
ko04064	NF-kappa B signaling pathway	0.562349	ENSRNOG00000015615	Tnfrsf11a	K05147	NA	TNF receptor superfamily member 11A [Source:RGD Symbol;Acc:1563614]	11.8889	9.01333	10.4355	4.72597	5.05818	3.3997	2.37698	1.24913	up
ko04064	NF-kappa B signaling pathway	0.562349	ENSRNOG00000016995	Zap70	K07360	EC:2.7.10.2	zeta chain of T cell receptor associated protein kinase 70 [Source:RGD Symbol;Acc:3983]	1.91387	2.38414	1.62197	5.55549	9.51381	5.03816	0.294417	-1.76407	down
ko04064	NF-kappa B signaling pathway	0.562349	ENSRNOG00000017429	Lat	K07362	NA	linker for activation of T cells [Source:RGD Symbol;Acc:620802]	7.77653	7.11948	5.88298	20.675	13.8754	9.08614	0.476183	-1.07041	down
ko04064	NF-kappa B signaling pathway	0.562349	ENSRNOG00000034290	Ccl21	K16062	NA	C-C motif chemokine ligand 21 [Source:RGD Symbol;Acc:1311996]	171.913	158.057	123.877	70.7503	53.7025	41.4424	2.73575	1.45194	up
ko04064	NF-kappa B signaling pathway	0.562349	ENSRNOG00000051986	Plcg2	NA	NA	phospholipase C, gamma 2 [Source:RGD Symbol;Acc:3348]	5.19104	6.76231	4.63746	12.3585	15.9316	15.9714	0.374836	-1.41567	down
ko05032	Morphine addiction	0.562349	ENSRNOG00000003442	Adora1	NA	NA	adenosine A1 receptor [Source:RGD Symbol;Acc:2048]	2.22958	2.85704	1.93044	0.530347	0.128806	0.423696	6.48019	2.69604	up
ko05032	Morphine addiction	0.562349	ENSRNOG00000004560	Cacna1b	K04849	NA	calcium voltage-gated channel subunit alpha1 B [Source:RGD Symbol;Acc:628852]	0.178632	0.207804	0.083371	0.0219777	0.0460863	0.0587362	3.7051	1.88951	up
ko05032	Morphine addiction	0.562349	ENSRNOG00000019518	Pde4c	K13293	EC:3.1.4.53	phosphodiesterase 4C [Source:RGD Symbol;Acc:727918]	3.44955	3.5173	4.16828	12.8874	12.1926	12.824	0.293772	-1.76723	down
ko05032	Morphine addiction	0.562349	ENSRNOG00000019560	Pde2a	K18283	EC:3.1.4.17	phosphodiesterase 2A [Source:RGD Symbol;Acc:620965]	4.49349	5.63086	3.16365	7.51152	9.28259	10.7771	0.481952	-1.05304	down
ko05032	Morphine addiction	0.562349	ENSRNOG00000032417	Gabrp	K05189	NA	gamma-aminobutyric acid type A receptor pi subunit [Source:RGD Symbol;Acc:620532]	3.74924	2.43961	2.02034	0.092348	0.19525	0.36241	12.6294	3.65871	up
ko05032	Morphine addiction	0.562349	ENSRNOG00000054212	Pde1a	K13755	EC:3.1.4.17	phosphodiesterase 1A [Source:RGD Symbol;Acc:68329]	2.47149	1.9009	2.38077	0.828064	0.871072	1.06546	2.44273	1.28849	up
ko05032	Morphine addiction	0.562349	ENSRNOG00000054371	Prkcg	K19663	EC:2.7.11.13	protein kinase C, gamma [Source:RGD Symbol;Acc:3397]	1.53377	1.93347	1.8286	3.48216	4.70262	3.15826	0.46688	-1.09888	down
ko05032	Morphine addiction	0.562349	ENSRNOG00000059479	Adcy1	K08041	EC:4.6.1.1	adenylate cyclase 1 [Source:RGD Symbol;Acc:1309318]	0.206208	0.356452	0.124273	1.28217	1.19576	1.45355	0.174726	-2.51683	down
ko05160	Hepatitis C	0.564761	ENSRNOG00000000521	Cdkn1a	K06625	NA	cyclin-dependent kinase inhibitor 1A [Source:RGD Symbol;Acc:69328]	60.966	98.6015	55.2437	36.6148	37.2161	27.4646	2.12064	1.0845	up
ko05160	Hepatitis C	0.564761	ENSRNOG00000001476	Cldn4	K06087	NA	claudin 4 [Source:RGD Symbol;Acc:1307932]	13.9115	12.0102	14.9617	3.95699	3.62557	4.40384	3.41082	1.77012	up
ko05160	Hepatitis C	0.564761	ENSRNOG00000001926	Cldn1	K06087	NA	claudin 1 [Source:RGD Symbol;Acc:68422]	0.854451	0.532531	0.439747	1.26286	1.16606	2.36597	0.380974	-1.39223	down
ko05160	Hepatitis C	0.564761	ENSRNOG00000002978	Faslg	K04389	NA	Fas ligand [Source:RGD Symbol;Acc:3880]	0.816894	1.01133	0.807977	3.43662	5.79528	3.71874	0.203558	-2.29649	down
ko05160	Hepatitis C	0.564761	ENSRNOG00000003648	Cldn6	K06087	NA	claudin 6 [Source:RGD Symbol;Acc:1308837]	5.55802	3.20902	3.03748	0.538814	0.51741	0.201333	9.38687	3.23064	up
ko05160	Hepatitis C	0.564761	ENSRNOG00000007468	Ifng	K04687	NA	interferon gamma [Source:RGD Symbol;Acc:2866]	0	0	0	0.111509	0.315579	0.259981	0.000436637	-11.1613	down
ko05160	Hepatitis C	0.564761	ENSRNOG00000010263	Cldn11	K06087	NA	claudin 11 [Source:RGD Symbol;Acc:71081]	9.74336	8.428	8.69926	2.68847	2.864	2.8561	3.19562	1.6761	up
ko05160	Hepatitis C	0.564761	ENSRNOG00000018851	Ppp2r2b	K04354	NA	protein phosphatase 2, regulatory subunit B, beta [Source:RGD Symbol;Acc:631441]	3.16847	2.77345	3.60839	1.62792	1.1151	0.816664	2.68291	1.4238	up
ko05160	Hepatitis C	0.564761	ENSRNOG00000033220	Oas1f	K14216	EC:2.7.7.84	2 ' -5 ' oligoadenylate synthetase 1K [Source:RGD Symbol;Acc:1359279]	3.6928	3.76642	4.23323	6.69215	8.17991	12.1065	0.433399	-1.20623	down
ko05160	Hepatitis C	0.564761	ENSRNOG00000036603	Ifit1bl	K14217	NA	interferon-induced protein with tetratricopeptide repeats 1B-like [Source:RGD Symbol;Acc:1304872]	4.40436	2.19039	2.30136	7.82822	4.69635	11.8801	0.364524	-1.45591	down
ko05160	Hepatitis C	0.564761	ENSRNOG00000049282	Oas2	K14216	EC:2.7.7.84	2'-5' oligoadenylate synthetase 2 [Source:RGD Symbol;Acc:1359697]	5.34061	3.73047	5.27	6.26648	8.56011	14.4739	0.489448	-1.03077	down
ko05160	Hepatitis C	0.564761	ENSRNOG00000051964	LOC108348190	K04357	NA	uncharacterized LOC108348190 [Source:RGD Symbol;Acc:11520363]	0.212498	0.315292	0.147029	0.358931	0.514377	0.568232	0.468124	-1.09504	down
ko05160	Hepatitis C	0.564761	ENSRNOG00000059207	Oas3	K14216	EC:2.7.7.84	2'-5'-oligoadenylate synthetase 3 [Source:RGD Symbol;Acc:1359319]	0.872448	0.892314	1.46246	2.50712	3.07751	4.09149	0.333524	-1.58414	down
ko05225	Hepatocellular carcinoma	0.573715	ENSRNOG00000000521	Cdkn1a	K06625	NA	cyclin-dependent kinase inhibitor 1A [Source:RGD Symbol;Acc:69328]	60.966	98.6015	55.2437	36.6148	37.2161	27.4646	2.12064	1.0845	up
ko05225	Hepatocellular carcinoma	0.573715	ENSRNOG00000002418	Tgfb2	K13376	NA	transforming growth factor, beta 2 [Source:RGD Symbol;Acc:70491]	32.2616	34.4352	34.8496	12.3645	10.9716	12.4504	2.83756	1.50465	up
ko05225	Hepatocellular carcinoma	0.573715	ENSRNOG00000008030	Shc2	K17447	NA	SHC adaptor protein 2 [Source:RGD Symbol;Acc:1307137]	1.08558	1.2228	0.495709	1.31078	2.86654	1.98796	0.45482	-1.13663	down
ko05225	Hepatocellular carcinoma	0.573715	ENSRNOG00000009867	Tgfb3	K13377	NA	transforming growth factor, beta 3 [Source:RGD Symbol;Acc:3851]	28.04	20.6768	22.6266	8.0599	7.08636	6.45932	3.30208	1.72338	up
ko05225	Hepatocellular carcinoma	0.573715	ENSRNOG00000014117	Hmox1	K00510	EC:1.14.14.18	heme oxygenase 1 [Source:RGD Symbol;Acc:2806]	551.077	151.281	396.168	28.4904	25.1169	27.1124	13.6091	3.7665	up
ko05225	Hepatocellular carcinoma	0.573715	ENSRNOG00000014385	Wnt2b	K00182	NA	Wnt family member 2B [Source:RGD Symbol;Acc:69346]	1.93844	1.91525	1.50408	7.62981	5.39889	3.48382	0.324467	-1.62386	down
ko05225	Hepatocellular carcinoma	0.573715	ENSRNOG00000015618	Wnt5a	K00444	NA	Wnt family member 5A [Source:RGD Symbol;Acc:69250]	7.40085	6.90616	6.99221	3.0348	2.5955	2.2052	2.7183	1.4427	up
ko05225	Hepatocellular carcinoma	0.573715	ENSRNOG00000015750	Wnt7b	K00572	NA	Wnt family member 7B [Source:RGD Symbol;Acc:1311441]	1.76975	1.41713	2.20033	0.207026	0.670733	0.684039	3.44937	1.78633	up
ko05225	Hepatocellular carcinoma	0.573715	ENSRNOG00000019017	Gstm6	K00799	EC:2.5.1.18	glutathione S-transferase, mu 6 [Source:RGD Symbol;Acc:1563391]	0.072552	0.084308	0.123574	0.465283	0.252652	0.528694	0.224954	-2.1523	down
ko05225	Hepatocellular carcinoma	0.573715	ENSRNOG00000022784	Fzd10	K02842	NA	frizzled class receptor 10 [Source:RGD Symbol;Acc:1583825]	0.099555	0.232361	0.089789	0.016885	0.017521	0.023113	7.33158	2.87412	up
ko05225	Hepatocellular carcinoma	0.573715	ENSRNOG00000049743	Gstm5	K00799	EC:2.5.1.18	glutathione S-transferase, mu 5 [Source:RGD Symbol;Acc:61964]	14.3618	10.7391	15.0375	7.82087	6.10415	5.18534	2.10035	1.07063	up
ko05225	Hepatocellular carcinoma	0.573715	ENSRNOG00000051986	Plcg2	NA	NA	phospholipase C, gamma 2 [Source:RGD Symbol;Acc:3348]	5.19104	6.76231	4.63746	12.3585	15.9316	15.9714	0.374836	-1.41567	down
ko05225	Hepatocellular carcinoma	0.573715	ENSRNOG00000054371	Prkcg	K19663	EC:2.7.11.13	protein kinase C, gamma [Source:RGD Symbol;Acc:3397]	1.53377	1.93347	1.8286	3.48216	4.70262	3.15826	0.46688	-1.09888	down
ko05225	Hepatocellular carcinoma	0.573715	ENSRNOG00000059810	Txnrd3	K22182	EC:1.8.1.9	thioredoxin reductase 3 [Source:RGD Symbol;Acc:1308363]	9.8152	9.4471	9.28252	3.26938	2.99361	3.31977	2.97877	1.57471	up
ko05225	Hepatocellular carcinoma	0.573715	ENSRNOG00000059837	Cdkn2a	K06621	NA	cyclin-dependent kinase inhibitor 2A [Source:RGD Symbol;Acc:2323]	1.75201	2.25335	0.861979	0.590342	0.229968	0.204869	4.7478	2.24726	up
ko04370	VEGF signaling pathway	0.576558	ENSRNOG00000002525	Ptgs2	NA	NA	prostaglandin-endoperoxide synthase 2 [Source:RGD Symbol;Acc:620349]	1.16561	3.47891	3.42764	1.65163	1.08205	1.05589	2.1301	1.09092	up
ko04370	VEGF signaling pathway	0.576558	ENSRNOG00000008030	Shc2	K17447	NA	SHC adaptor protein 2 [Source:RGD Symbol;Acc:1307137]	1.08558	1.2228	0.495709	1.31078	2.86654	1.98796	0.45482	-1.13663	down
ko04370	VEGF signaling pathway	0.576558	ENSRNOG00000013294	Sh2d2a	K08273	NA	SH2 domain containing 2A [Source:RGD Symbol;Acc:1303076]	1.52172	2.40923	1.29191	3.7718	6.97285	3.1891	0.374835	-1.41567	down
ko04370	VEGF signaling pathway	0.576558	ENSRNOG00000051986	Plcg2	NA	NA	phospholipase C, gamma 2 [Source:RGD Symbol;Acc:3348]	5.19104	6.76231	4.63746	12.3585	15.9316	15.9714	0.374836	-1.41567	down
ko04370	VEGF signaling pathway	0.576558	ENSRNOG00000054371	Prkcg	K19663	EC:2.7.11.13	protein kinase C, gamma [Source:RGD Symbol;Acc:3397]	1.53377	1.93347	1.8286	3.48216	4.70262	3.15826	0.46688	-1.09888	down
ko05320	Autoimmune thyroid disease	0.576558	ENSRNOG00000000562	Prf1	K07818	NA	perforin 1 [Source:RGD Symbol;Acc:708463]	8.20777	9.31399	3.00773	32.4085	55.6601	39.4225	0.161027	-2.63463	down
ko05320	Autoimmune thyroid disease	0.576558	ENSRNOG00000002978	Faslg	K04389	NA	Fas ligand [Source:RGD Symbol;Acc:3880]	0.816894	1.01133	0.807977	3.43662	5.79528	3.71874	0.203558	-2.29649	down
ko05320	Autoimmune thyroid disease	0.576558	ENSRNOG00000045973	Gzmb	K01353	EC:3.4.21.79	granzyme B [Source:RGD Symbol;Acc:620018]	1.2569	2.48146	1.0418	7.67971	19.0044	10.3411	0.129105	-2.95338	down
ko05320	Autoimmune thyroid disease	0.576558	ENSRNOG00000047864	LOC108348072	K06752	NA	RT1 class II, locus DMa [Source:RGD Symbol;Acc:735053]	18.1206	19.1445	16.0483	10.0005	6.31184	7.37897	2.25034	1.17014	up
ko05320	Autoimmune thyroid disease	0.576558	ENSRNOG00000049976	Gzmbl2	K01353	EC:3.4.21.79	Granzyme B-like 2 [Source:RGD Symbol;Acc:2320097]	2.02426	2.40992	1.11774	7.66841	9.94887	9.79654	0.202523	-2.30384	down
ko04611	Platelet activation	0.576565	ENSRNOG00000002361	Prkg2	K19477	EC:2.7.11.12	protein kinase cGMP-dependent 2 [Source:RGD Symbol;Acc:3401]	0.031366	0.079933	0.107604	0	0	0.017976	12.1775	3.60615	up
ko04611	Platelet activation	0.576565	ENSRNOG00000003357	Col3a1	K19720	NA	collagen type III alpha 1 chain [Source:RGD Symbol;Acc:71029]	773.166	628.281	469.974	156.474	148.568	159.465	4.02884	2.01036	up
ko04611	Platelet activation	0.576565	ENSRNOG00000003897	Col1a1	NA	NA	collagen type I alpha 1 chain [Source:RGD Symbol;Acc:61817]	330.164	210.993	127.588	21.9343	20.0594	21.0288	10.6112	3.40752	up
ko04611	Platelet activation	0.576565	ENSRNOG00000009440	Gucy1b2	K12319	EC:4.6.1.2	guanylate cyclase 1 soluble subunit beta 2 [Source:RGD Symbol;Acc:2770]	0.0654379	0.0684079	0.0307582	0	0	0	548.68	9.09982	up
ko04611	Platelet activation	0.576565	ENSRNOG00000011292	NEWGENE_621351	K06236	NA	collagen, type I, alpha 2 [Source:RGD Symbol;Acc:9452897]	262.119	200.003	149.732	39.3449	35.4719	44.7937	5.11539	2.35484	up
ko04611	Platelet activation	0.576565	ENSRNOG00000021098	Rasgrp2	K12361	NA	RAS guanyl releasing protein 2 [Source:RGD Symbol;Acc:1311630]	8.21941	9.41176	4.73127	17.3456	22.6314	17.6577	0.388003	-1.36586	down
ko04611	Platelet activation	0.576565	ENSRNOG00000033119	Plcb4	K05858	EC:3.1.4.11	phospholipase C, beta 4 [Source:RGD Symbol;Acc:3345]	7.14989	7.94063	6.17429	13.1434	15.847	14.3553	0.490587	-1.02742	down
ko04611	Platelet activation	0.576565	ENSRNOG00000051986	Plcg2	NA	NA	phospholipase C, gamma 2 [Source:RGD Symbol;Acc:3348]	5.19104	6.76231	4.63746	12.3585	15.9316	15.9714	0.374836	-1.41567	down
ko04611	Platelet activation	0.576565	ENSRNOG00000052925	NEWGENE_621351	K06236	NA	collagen, type I, alpha 2 [Source:RGD Symbol;Acc:9452897]	98.967	66.7797	60.9449	18.46	15.0008	14.0315	4.77323	2.25497	up
ko04611	Platelet activation	0.576565	ENSRNOG00000058111	Itga2	K06481	NA	integrin subunit alpha 2 [Source:RGD Symbol;Acc:621632]	2.02287	2.41017	1.73864	0.541871	0.886078	0.645843	2.97604	1.57339	up
ko04611	Platelet activation	0.576565	ENSRNOG00000059479	Adcy1	K08041	EC:4.6.1.1	adenylate cyclase 1 [Source:RGD Symbol;Acc:1309318]	0.206208	0.356452	0.124273	1.28217	1.19576	1.45355	0.174726	-2.51683	down
ko05218	Melanoma	0.580354	ENSRNOG00000000521	Cdkn1a	K06625	NA	cyclin-dependent kinase inhibitor 1A [Source:RGD Symbol;Acc:69328]	60.966	98.6015	55.2437	36.6148	37.2161	27.4646	2.12064	1.0845	up
ko05218	Melanoma	0.580354	ENSRNOG00000002244	Pdgfra	K04363	EC:2.7.10.1	platelet derived growth factor receptor alpha [Source:RGD Symbol;Acc:3284]	10.7913	10.4928	10.1398	22.5292	21.8926	24.1598	0.458196	-1.12596	down
ko05218	Melanoma	0.580354	ENSRNOG00000018461	Pdgfrb	NA	NA	platelet derived growth factor receptor beta [Source:RGD Symbol;Acc:3285]	29.9477	33.1625	27.8463	12.2108	11.6934	13.6546	2.42171	1.27603	up
ko05218	Melanoma	0.580354	ENSRNOG00000051964	LOC108348190	K04357	NA	uncharacterized LOC108348190 [Source:RGD Symbol;Acc:11520363]	0.212498	0.315292	0.147029	0.358931	0.514377	0.568232	0.468124	-1.09504	down
ko05218	Melanoma	0.580354	ENSRNOG00000052205	Fgf23	K22428	NA	fibroblast growth factor 23 [Source:RGD Symbol;Acc:620178]	0.318321	0.976255	0.694014	0	0	0	6628.63	12.6945	up
ko05218	Melanoma	0.580354	ENSRNOG00000059837	Cdkn2a	K06621	NA	cyclin-dependent kinase inhibitor 2A [Source:RGD Symbol;Acc:2323]	1.75201	2.25335	0.861979	0.590342	0.229968	0.204869	4.7478	2.24726	up
ko05140	Leishmaniasis	0.580354	ENSRNOG00000002418	Tgfb2	K13376	NA	transforming growth factor, beta 2 [Source:RGD Symbol;Acc:70491]	32.2616	34.4352	34.8496	12.3645	10.9716	12.4504	2.83756	1.50465	up
ko05140	Leishmaniasis	0.580354	ENSRNOG00000002525	Ptgs2	NA	NA	prostaglandin-endoperoxide synthase 2 [Source:RGD Symbol;Acc:620349]	1.16561	3.47891	3.42764	1.65163	1.08205	1.05589	2.1301	1.09092	up
ko05140	Leishmaniasis	0.580354	ENSRNOG00000007468	Ifng	K04687	NA	interferon gamma [Source:RGD Symbol;Acc:2866]	0	0	0	0.111509	0.315579	0.259981	0.000436637	-11.1613	down
ko05140	Leishmaniasis	0.580354	ENSRNOG00000009113	Marcksl1	K13536	NA	MARCKS-like 1 [Source:RGD Symbol;Acc:621197]	20.18	22.0064	20.5725	7.89432	9.02415	9.91001	2.33927	1.22606	up
ko05140	Leishmaniasis	0.580354	ENSRNOG00000009867	Tgfb3	K13377	NA	transforming growth factor, beta 3 [Source:RGD Symbol;Acc:3851]	28.04	20.6768	22.6266	8.0599	7.08636	6.45932	3.30208	1.72338	up
ko05140	Leishmaniasis	0.580354	ENSRNOG00000047864	LOC108348072	K06752	NA	RT1 class II, locus DMa [Source:RGD Symbol;Acc:735053]	18.1206	19.1445	16.0483	10.0005	6.31184	7.37897	2.25034	1.17014	up
ko04915	Estrogen signaling pathway	0.587332	ENSRNOG00000003899	Krt14	K07604	NA	keratin 14 [Source:RGD Symbol;Acc:1307463]	11.4739	2.4835	3.61718	0.652862	0.416594	1.13165	7.98447	2.9972	up
ko04915	Estrogen signaling pathway	0.587332	ENSRNOG00000008030	Shc2	K17447	NA	SHC adaptor protein 2 [Source:RGD Symbol;Acc:1307137]	1.08558	1.2228	0.495709	1.31078	2.86654	1.98796	0.45482	-1.13663	down
ko04915	Estrogen signaling pathway	0.587332	ENSRNOG00000014099	Krt15	K07604	NA	keratin 15 [Source:RGD Symbol;Acc:1303044]	0.401932	0.587568	0.379119	1.26745	1.08769	0.885265	0.42236	-1.24346	down
ko04915	Estrogen signaling pathway	0.587332	ENSRNOG00000014290	Grm1	K04603	NA	glutamate metabotropic receptor 1 [Source:RGD Symbol;Acc:2742]	0.009912	0	0.015688	0.069331	0.104979	0.0226431	0.12998	-2.94364	down
ko04915	Estrogen signaling pathway	0.587332	ENSRNOG00000016695	Mmp2	K01398	EC:3.4.24.24	matrix metallopeptidase 2 [Source:RGD Symbol;Acc:621316]	112.629	84.3299	76.9475	30.7938	26.2646	32.2348	3.06749	1.61706	up
ko04915	Estrogen signaling pathway	0.587332	ENSRNOG00000017539	Mmp9	K01403	EC:3.4.24.35	matrix metallopeptidase 9 [Source:RGD Symbol;Acc:621320]	0.708985	0.326444	0.167858	0.688657	1.06294	1.59762	0.359274	-1.47684	down
ko04915	Estrogen signaling pathway	0.587332	ENSRNOG00000022523	Fkbp5	K09571	EC:5.2.1.8	FKBP prolyl isomerase 5 [Source:RGD Symbol;Acc:1309155]	10.6739	10.2676	11.1153	18.0189	24.3249	23.222	0.488927	-1.03231	down
ko04915	Estrogen signaling pathway	0.587332	ENSRNOG00000026371	Krt17	K07604	NA	keratin 17 [Source:RGD Symbol;Acc:1303181]	7.13966	2.26715	4.11063	0.157572	0.259818	0.24394	20.4398	4.35331	up
ko04915	Estrogen signaling pathway	0.587332	ENSRNOG00000033119	Plcb4	K05858	EC:3.1.4.11	phospholipase C, beta 4 [Source:RGD Symbol;Acc:3345]	7.14989	7.94063	6.17429	13.1434	15.847	14.3553	0.490587	-1.02742	down
ko04915	Estrogen signaling pathway	0.587332	ENSRNOG00000047393	Krt18	K07604	NA	keratin 18 [Source:RGD Symbol;Acc:619935]	112.012	81.6653	259.884	54.7681	51.7752	56.4692	2.78237	1.47631	up
ko04915	Estrogen signaling pathway	0.587332	ENSRNOG00000059479	Adcy1	K08041	EC:4.6.1.1	adenylate cyclase 1 [Source:RGD Symbol;Acc:1309318]	0.206208	0.356452	0.124273	1.28217	1.19576	1.45355	0.174726	-2.51683	down
ko00591	Linoleic acid metabolism	0.589901	ENSRNOG00000012458	Cyp2e1	K07415	EC:1.14.13.-	cytochrome P450, family 2, subfamily e, polypeptide 1 [Source:RGD Symbol;Acc:2475]	1.59029	2.0422	0.503894	11.7452	14.7012	19.1101	0.090797	-3.46121	down
ko00591	Linoleic acid metabolism	0.589901	ENSRNOG00000016945	Pla2g2a	NA	NA	phospholipase A2 group IIA [Source:RGD Symbol;Acc:620857]	430.776	142.041	305.208	62.6552	8.5295	13.1795	10.4076	3.37956	up
ko00591	Linoleic acid metabolism	0.589901	ENSRNOG00000046643	Cyp3a9	K07424	EC:1.14.14.1	cytochrome P450, family 3, subfamily a, polypeptide 9 [Source:RGD Symbol;Acc:708392]	1.53291	1.42943	1.53715	3.08589	4.81783	3.05246	0.41068	-1.28391	down
ko04920	Adipocytokine signaling pathway	0.59477	ENSRNOG00000001389	Irs3	K17445	NA	insulin receptor substrate 3 [Source:RGD Symbol;Acc:69317]	2.43177	2.38892	1.71038	5.37503	4.18174	3.98315	0.482357	-1.05183	down
ko04920	Adipocytokine signaling pathway	0.59477	ENSRNOG00000004473	Ppargc1a	K07202	NA	PPARG coactivator 1 alpha [Source:RGD Symbol;Acc:620925]	0.699099	0.733841	0.380414	1.49528	2.21646	2.7585	0.280261	-1.83516	down
ko04920	Adipocytokine signaling pathway	0.59477	ENSRNOG00000009768	LOC100912228	NA	NA	pro-neuropeptide Y-like [Source:RGD Symbol;Acc:6487865]	5.52974	7.0638	11.5309	19.3687	12.1043	22.9197	0.443523	-1.17292	down
ko04920	Adipocytokine signaling pathway	0.59477	ENSRNOG00000017226	Slc2a4	K07191	NA	solute carrier family 2 member 4 [Source:RGD Symbol;Acc:2711]	1.77573	2.8625	1.51947	0.725115	0.747971	0.866538	2.63192	1.39612	up
ko04920	Adipocytokine signaling pathway	0.59477	ENSRNOG00000023664	Lepr	K05062	NA	leptin receptor [Source:RGD Symbol;Acc:3001]	1.64218	1.61979	1.27077	3.58304	4.59652	3.2965	0.394973	-1.34017	down
ko04920	Adipocytokine signaling pathway	0.59477	ENSRNOG00000046449	Npy	K05232	NA	neuropeptide Y [Source:RGD Symbol;Acc:3197]	5.83501	7.53937	12.3021	20.7918	13.0994	24.5613	0.43927	-1.18682	down
ko04930	Type II diabetes mellitus	0.607958	ENSRNOG00000001389	Irs3	K17445	NA	insulin receptor substrate 3 [Source:RGD Symbol;Acc:69317]	2.43177	2.38892	1.71038	5.37503	4.18174	3.98315	0.482357	-1.05183	down
ko04930	Type II diabetes mellitus	0.607958	ENSRNOG00000004560	Cacna1b	K04849	NA	calcium voltage-gated channel subunit alpha1 B [Source:RGD Symbol;Acc:628852]	0.178632	0.207804	0.083371	0.0219777	0.0460863	0.0587362	3.7051	1.88951	up
ko04930	Type II diabetes mellitus	0.607958	ENSRNOG00000015603	Prkce	NA	NA	protein kinase C, epsilon [Source:RGD Symbol;Acc:61925]	7.93806	8.81436	6.50926	11.1812	15.7408	20.6574	0.488903	-1.03238	down
ko04930	Type II diabetes mellitus	0.607958	ENSRNOG00000017226	Slc2a4	K07191	NA	solute carrier family 2 member 4 [Source:RGD Symbol;Acc:2711]	1.77573	2.8625	1.51947	0.725115	0.747971	0.866538	2.63192	1.39612	up
ko04010	MAPK signaling pathway	0.609006	ENSRNOG00000002244	Pdgfra	K04363	EC:2.7.10.1	platelet derived growth factor receptor alpha [Source:RGD Symbol;Acc:3284]	10.7913	10.4928	10.1398	22.5292	21.8926	24.1598	0.458196	-1.12596	down
ko04010	MAPK signaling pathway	0.609006	ENSRNOG00000002418	Tgfb2	K13376	NA	transforming growth factor, beta 2 [Source:RGD Symbol;Acc:70491]	32.2616	34.4352	34.8496	12.3645	10.9716	12.4504	2.83756	1.50465	up
ko04010	MAPK signaling pathway	0.609006	ENSRNOG00000002754	Areg	K09782	NA	amphiregulin [Source:RGD Symbol;Acc:2149]	15.0098	32.3225	41.5271	12.678	12.7718	5.23223	2.89613	1.53413	up
ko04010	MAPK signaling pathway	0.609006	ENSRNOG00000002771	Ereg	K09784	NA	epiregulin [Source:RGD Symbol;Acc:620299]	3.53527	6.81166	10.5663	3.01735	3.00566	2.96011	2.32806	1.21913	up
ko04010	MAPK signaling pathway	0.609006	ENSRNOG00000002978	Faslg	K04389	NA	Fas ligand [Source:RGD Symbol;Acc:3880]	0.816894	1.01133	0.807977	3.43662	5.79528	3.71874	0.203558	-2.29649	down
ko04010	MAPK signaling pathway	0.609006	ENSRNOG00000003245	Cacng1	NA	NA	calcium voltage-gated channel auxiliary subunit gamma 1 [Source:RGD Symbol;Acc:2249]	0.342541	0.070667	0.216756	0.041472	0	0	15.1901	3.92506	up
ko04010	MAPK signaling pathway	0.609006	ENSRNOG00000004560	Cacna1b	K04849	NA	calcium voltage-gated channel subunit alpha1 B [Source:RGD Symbol;Acc:628852]	0.178632	0.207804	0.083371	0.0219777	0.0460863	0.0587362	3.7051	1.88951	up
ko04010	MAPK signaling pathway	0.609006	ENSRNOG00000005133	Mapt	NA	NA	microtubule-associated protein tau [Source:RGD Symbol;Acc:69329]	7.5245	9.76201	5.82117	16.5807	19.3475	20.2951	0.410998	-1.2828	down
ko04010	MAPK signaling pathway	0.609006	ENSRNOG00000005650	Pgf	K16859	NA	placental growth factor [Source:RGD Symbol;Acc:619850]	4.74821	4.86013	6.89225	1.81335	1.74628	1.74662	3.10965	1.63675	up
ko04010	MAPK signaling pathway	0.609006	ENSRNOG00000007666	Cacnb4	K04865	NA	calcium voltage-gated channel auxiliary subunit beta 4 [Source:RGD Symbol;Acc:68385]	0.231166	0.227915	0.115713	0.714819	1.19904	0.551053	0.23319	-2.10042	down
ko04010	MAPK signaling pathway	0.609006	ENSRNOG00000008587	Tek	K05121	EC:2.7.10.1	TEK receptor tyrosine kinase [Source:RGD Symbol;Acc:620980]	65.5676	80.6655	55.963	143.626	152.459	196.801	0.410229	-1.2855	down
ko04010	MAPK signaling pathway	0.609006	ENSRNOG00000008936	Map3k6	K04425	EC:2.7.11.25	mitogen-activated protein kinase kinase kinase 6 [Source:RGD Symbol;Acc:1304625]	4.22034	4.69714	4.9599	7.72607	11.6378	10.5608	0.463743	-1.1086	down
ko04010	MAPK signaling pathway	0.609006	ENSRNOG00000009867	Tgfb3	K13377	NA	transforming growth factor, beta 3 [Source:RGD Symbol;Acc:3851]	28.04	20.6768	22.6266	8.0599	7.08636	6.45932	3.30208	1.72338	up
ko04010	MAPK signaling pathway	0.609006	ENSRNOG00000013953	Ntrk1	K03176	EC:2.7.10.1	neurotrophic receptor tyrosine kinase 1 [Source:RGD Symbol;Acc:620144]	0.089799	0.0959429	0.0319835	0.269543	0.411822	0.210092	0.244236	-2.03366	down
ko04010	MAPK signaling pathway	0.609006	ENSRNOG00000014248	Erbb4	K05085	EC:2.7.10.1	erb-b2 receptor tyrosine kinase 4 [Source:RGD Symbol;Acc:620486]	0.102964	0.118757	0.047957	0.602772	0.820792	0.860173	0.118086	-3.08209	down
ko04010	MAPK signaling pathway	0.609006	ENSRNOG00000016571	Ngf	K02582	NA	nerve growth factor [Source:RGD Symbol;Acc:1598328]	0.683532	0.348949	0.591755	0.156563	0.22621	0.0462036	3.78631	1.92079	up
ko04010	MAPK signaling pathway	0.609006	ENSRNOG00000016696	Angpt2	K05466	NA	angiopoietin 2 [Source:RGD Symbol;Acc:621861]	8.59042	8.08431	6.18316	3.01199	2.77709	3.05503	2.58453	1.3699	up
ko04010	MAPK signaling pathway	0.609006	ENSRNOG00000018461	Pdgfrb	NA	NA	platelet derived growth factor receptor beta [Source:RGD Symbol;Acc:3285]	29.9477	33.1625	27.8463	12.2108	11.6934	13.6546	2.42171	1.27603	up
ko04010	MAPK signaling pathway	0.609006	ENSRNOG00000018839	Ntrk2	K04360	EC:2.7.10.1	neurotrophic receptor tyrosine kinase 2 [Source:RGD Symbol;Acc:3213]	2.74908	5.01041	5.1754	0.644865	1.09069	0.941283	4.83215	2.27267	up
ko04010	MAPK signaling pathway	0.609006	ENSRNOG00000020588	Efna4	K05462	NA	ephrin A4 [Source:RGD Symbol;Acc:1307808]	4.37508	3.91485	4.22177	1.50692	1.92215	1.37655	2.60356	1.38048	up
ko04010	MAPK signaling pathway	0.609006	ENSRNOG00000021098	Rasgrp2	K12361	NA	RAS guanyl releasing protein 2 [Source:RGD Symbol;Acc:1311630]	8.21941	9.41176	4.73127	17.3456	22.6314	17.6577	0.388003	-1.36586	down
ko04010	MAPK signaling pathway	0.609006	ENSRNOG00000051964	LOC108348190	K04357	NA	uncharacterized LOC108348190 [Source:RGD Symbol;Acc:11520363]	0.212498	0.315292	0.147029	0.358931	0.514377	0.568232	0.468124	-1.09504	down
ko04010	MAPK signaling pathway	0.609006	ENSRNOG00000052205	Fgf23	K22428	NA	fibroblast growth factor 23 [Source:RGD Symbol;Acc:620178]	0.318321	0.976255	0.694014	0	0	0	6628.63	12.6945	up
ko04010	MAPK signaling pathway	0.609006	ENSRNOG00000054274	Cacnb3	NA	NA	calcium voltage-gated channel auxiliary subunit beta 3 [Source:RGD Symbol;Acc:2248]	12.6099	10.2322	7.67604	5.49561	3.55387	4.34237	2.27886	1.18831	up
ko04010	MAPK signaling pathway	0.609006	ENSRNOG00000054371	Prkcg	K19663	EC:2.7.11.13	protein kinase C, gamma [Source:RGD Symbol;Acc:3397]	1.53377	1.93347	1.8286	3.48216	4.70262	3.15826	0.46688	-1.09888	down
ko00051	Fructose and mannose metabolism	0.609994	ENSRNOG00000000165	Pfkfb1	K19028	3.1.3.46;EC:2.7.1.105	6-phosphofructo-2-kinase/fructose-2,6-biphosphatase 1 [Source:RGD Symbol;Acc:3307]	1.11783	0.881053	0.727267	2.39751	2.64934	3.50647	0.318724	-1.64962	down
ko00051	Fructose and mannose metabolism	0.609994	ENSRNOG00000009734	Akr1b8	K00011	EC:1.1.1.21	aldo-keto reductase family 1 member B10 [Source:RGD Symbol;Acc:1308277]	4.64044	3.49528	4.00072	1.64368	1.29778	1.50315	2.7306	1.44922	up
ko00051	Fructose and mannose metabolism	0.609994	ENSRNOG00000017597	Fbp1	K03841	EC:3.1.3.11	fructose-bisphosphatase 1 [Source:RGD Symbol;Acc:2595]	0.440079	0.319562	0.185471	2.73069	2.42502	2.11469	0.129995	-2.94348	down
ko05206	MicroRNAs in cancer	0.618913	ENSRNOG00000000521	Cdkn1a	K06625	NA	cyclin-dependent kinase inhibitor 1A [Source:RGD Symbol;Acc:69328]	60.966	98.6015	55.2437	36.6148	37.2161	27.4646	2.12064	1.0845	up
ko05206	MicroRNAs in cancer	0.618913	ENSRNOG00000002244	Pdgfra	K04363	EC:2.7.10.1	platelet derived growth factor receptor alpha [Source:RGD Symbol;Acc:3284]	10.7913	10.4928	10.1398	22.5292	21.8926	24.1598	0.458196	-1.12596	down
ko05206	MicroRNAs in cancer	0.618913	ENSRNOG00000002418	Tgfb2	K13376	NA	transforming growth factor, beta 2 [Source:RGD Symbol;Acc:70491]	32.2616	34.4352	34.8496	12.3645	10.9716	12.4504	2.83756	1.50465	up
ko05206	MicroRNAs in cancer	0.618913	ENSRNOG00000002525	Ptgs2	NA	NA	prostaglandin-endoperoxide synthase 2 [Source:RGD Symbol;Acc:620349]	1.16561	3.47891	3.42764	1.65163	1.08205	1.05589	2.1301	1.09092	up
ko05206	MicroRNAs in cancer	0.618913	ENSRNOG00000002548	Tnn	K06252	NA	tenascin N [Source:RGD Symbol;Acc:1306002]	3.51992	0.787354	1.0593	0.259756	0.338104	0.237335	6.42553	2.68382	up
ko05206	MicroRNAs in cancer	0.618913	ENSRNOG00000008012	Abcb4	K05658;K05659	EC:7.6.2.2	ATP binding cassette subfamily B member 1A [Source:RGD Symbol;Acc:619951]	3.31043	3.55892	2.92492	5.5518	10.3897	15.0847	0.315677	-1.66348	down
ko05206	MicroRNAs in cancer	0.618913	ENSRNOG00000014117	Hmox1	K00510	EC:1.14.14.18	heme oxygenase 1 [Source:RGD Symbol;Acc:2806]	551.077	151.281	396.168	28.4904	25.1169	27.1124	13.6091	3.7665	up
ko05206	MicroRNAs in cancer	0.618913	ENSRNOG00000014786	Ccne1	K06626	NA	cyclin E1 [Source:RGD Symbol;Acc:2294]	1.62725	1.32867	1.53513	0.320929	0.475594	0.655549	3.09286	1.62894	up
ko05206	MicroRNAs in cancer	0.618913	ENSRNOG00000015603	Prkce	NA	NA	protein kinase C, epsilon [Source:RGD Symbol;Acc:61925]	7.93806	8.81436	6.50926	11.1812	15.7408	20.6574	0.488903	-1.03238	down
ko05206	MicroRNAs in cancer	0.618913	ENSRNOG00000017539	Mmp9	K01403	EC:3.4.24.35	matrix metallopeptidase 9 [Source:RGD Symbol;Acc:621320]	0.708985	0.326444	0.167858	0.688657	1.06294	1.59762	0.359274	-1.47684	down
ko05206	MicroRNAs in cancer	0.618913	ENSRNOG00000018461	Pdgfrb	NA	NA	platelet derived growth factor receptor beta [Source:RGD Symbol;Acc:3285]	29.9477	33.1625	27.8463	12.2108	11.6934	13.6546	2.42171	1.27603	up
ko05206	MicroRNAs in cancer	0.618913	ENSRNOG00000030098	Trim71	K12035	EC:2.3.2.27	tripartite motif containing 71 [Source:RGD Symbol;Acc:1566388]	0.296049	0.284948	0.290987	0.506883	0.680973	0.714015	0.458487	-1.12505	down
ko05206	MicroRNAs in cancer	0.618913	ENSRNOG00000045829	Thbs1	K16857	NA	thrombospondin 1 [Source:RGD Symbol;Acc:1588455]	69.4641	106.372	164.303	19.9347	19.858	26.7682	5.11019	2.35338	up
ko05206	MicroRNAs in cancer	0.618913	ENSRNOG00000046635	Cdca5	K17390	NA	cell division cycle associated 5 [Source:RGD Symbol;Acc:1560863]	0.916011	0.843823	1.67507	0.239058	0.336403	0.356387	3.68612	1.8821	up
ko05206	MicroRNAs in cancer	0.618913	ENSRNOG00000051986	Plcg2	NA	NA	phospholipase C, gamma 2 [Source:RGD Symbol;Acc:3348]	5.19104	6.76231	4.63746	12.3585	15.9316	15.9714	0.374836	-1.41567	down
ko05206	MicroRNAs in cancer	0.618913	ENSRNOG00000054371	Prkcg	K19663	EC:2.7.11.13	protein kinase C, gamma [Source:RGD Symbol;Acc:3397]	1.53377	1.93347	1.8286	3.48216	4.70262	3.15826	0.46688	-1.09888	down
ko05206	MicroRNAs in cancer	0.618913	ENSRNOG00000058645	Tnc	K06252	NA	tenascin C [Source:RGD Symbol;Acc:621057]	32.8819	24.6221	38.6851	6.23045	5.06284	5.64608	5.67843	2.50549	up
ko05206	MicroRNAs in cancer	0.618913	ENSRNOG00000059837	Cdkn2a	K06621	NA	cyclin-dependent kinase inhibitor 2A [Source:RGD Symbol;Acc:2323]	1.75201	2.25335	0.861979	0.590342	0.229968	0.204869	4.7478	2.24726	up
ko04713	Circadian entrainment	0.62437	ENSRNOG00000002361	Prkg2	K19477	EC:2.7.11.12	protein kinase cGMP-dependent 2 [Source:RGD Symbol;Acc:3401]	0.031366	0.079933	0.107604	0	0	0.017976	12.1775	3.60615	up
ko04713	Circadian entrainment	0.62437	ENSRNOG00000006645	Ryr3	K04963	NA	ryanodine receptor 3 [Source:RGD Symbol;Acc:68952]	0.552848	0.70992	0.557857	1.46945	1.2114	2.06304	0.383784	-1.38163	down
ko04713	Circadian entrainment	0.62437	ENSRNOG00000009440	Gucy1b2	K12319	EC:4.6.1.2	guanylate cyclase 1 soluble subunit beta 2 [Source:RGD Symbol;Acc:2770]	0.0654379	0.0684079	0.0307582	0	0	0	548.68	9.09982	up
ko04713	Circadian entrainment	0.62437	ENSRNOG00000018712	Camk2a	K04515	EC:2.7.11.17	calcium/calmodulin-dependent protein kinase II alpha [Source:RGD Symbol;Acc:2261]	0.637376	1.01802	0.591485	1.83401	1.77662	1.39807	0.448596	-1.15651	down
ko04713	Circadian entrainment	0.62437	ENSRNOG00000020557	Ryr1	K04961	NA	ryanodine receptor 1 [Source:RGD Symbol;Acc:1586637]	0.0419302	0.0748344	0.0894049	0.149468	0.126131	0.169126	0.463588	-1.10908	down
ko04713	Circadian entrainment	0.62437	ENSRNOG00000033119	Plcb4	K05858	EC:3.1.4.11	phospholipase C, beta 4 [Source:RGD Symbol;Acc:3345]	7.14989	7.94063	6.17429	13.1434	15.847	14.3553	0.490587	-1.02742	down
ko04713	Circadian entrainment	0.62437	ENSRNOG00000054371	Prkcg	K19663	EC:2.7.11.13	protein kinase C, gamma [Source:RGD Symbol;Acc:3397]	1.53377	1.93347	1.8286	3.48216	4.70262	3.15826	0.46688	-1.09888	down
ko04713	Circadian entrainment	0.62437	ENSRNOG00000059479	Adcy1	K08041	EC:4.6.1.1	adenylate cyclase 1 [Source:RGD Symbol;Acc:1309318]	0.206208	0.356452	0.124273	1.28217	1.19576	1.45355	0.174726	-2.51683	down
ko04916	Melanogenesis	0.62437	ENSRNOG00000014385	Wnt2b	K00182	NA	Wnt family member 2B [Source:RGD Symbol;Acc:69346]	1.93844	1.91525	1.50408	7.62981	5.39889	3.48382	0.324467	-1.62386	down
ko04916	Melanogenesis	0.62437	ENSRNOG00000015618	Wnt5a	K00444	NA	Wnt family member 5A [Source:RGD Symbol;Acc:69250]	7.40085	6.90616	6.99221	3.0348	2.5955	2.2052	2.7183	1.4427	up
ko04916	Melanogenesis	0.62437	ENSRNOG00000015750	Wnt7b	K00572	NA	Wnt family member 7B [Source:RGD Symbol;Acc:1311441]	1.76975	1.41713	2.20033	0.207026	0.670733	0.684039	3.44937	1.78633	up
ko04916	Melanogenesis	0.62437	ENSRNOG00000018712	Camk2a	K04515	EC:2.7.11.17	calcium/calmodulin-dependent protein kinase II alpha [Source:RGD Symbol;Acc:2261]	0.637376	1.01802	0.591485	1.83401	1.77662	1.39807	0.448596	-1.15651	down
ko04916	Melanogenesis	0.62437	ENSRNOG00000022784	Fzd10	K02842	NA	frizzled class receptor 10 [Source:RGD Symbol;Acc:1583825]	0.099555	0.232361	0.089789	0.016885	0.017521	0.023113	7.33158	2.87412	up
ko04916	Melanogenesis	0.62437	ENSRNOG00000033119	Plcb4	K05858	EC:3.1.4.11	phospholipase C, beta 4 [Source:RGD Symbol;Acc:3345]	7.14989	7.94063	6.17429	13.1434	15.847	14.3553	0.490587	-1.02742	down
ko04916	Melanogenesis	0.62437	ENSRNOG00000054371	Prkcg	K19663	EC:2.7.11.13	protein kinase C, gamma [Source:RGD Symbol;Acc:3397]	1.53377	1.93347	1.8286	3.48216	4.70262	3.15826	0.46688	-1.09888	down
ko04916	Melanogenesis	0.62437	ENSRNOG00000059479	Adcy1	K08041	EC:4.6.1.1	adenylate cyclase 1 [Source:RGD Symbol;Acc:1309318]	0.206208	0.356452	0.124273	1.28217	1.19576	1.45355	0.174726	-2.51683	down
ko05231	Choline metabolism in cancer	0.62437	ENSRNOG00000001796	Dgkg	K00901	EC:2.7.1.107	diacylglycerol kinase, gamma [Source:RGD Symbol;Acc:2499]	0.478014	0.657643	0.542705	1.34259	1.57348	2.23499	0.325828	-1.61782	down
ko05231	Choline metabolism in cancer	0.62437	ENSRNOG00000002244	Pdgfra	K04363	EC:2.7.10.1	platelet derived growth factor receptor alpha [Source:RGD Symbol;Acc:3284]	10.7913	10.4928	10.1398	22.5292	21.8926	24.1598	0.458196	-1.12596	down
ko05231	Choline metabolism in cancer	0.62437	ENSRNOG00000016337	Slc22a1	K08198	NA	solute carrier family 22 member 1 [Source:RGD Symbol;Acc:3224]	0.503858	0.992112	0.350748	0.228038	0	0.02532	7.28897	2.86571	up
ko05231	Choline metabolism in cancer	0.62437	ENSRNOG00000018461	Pdgfrb	NA	NA	platelet derived growth factor receptor beta [Source:RGD Symbol;Acc:3285]	29.9477	33.1625	27.8463	12.2108	11.6934	13.6546	2.42171	1.27603	up
ko05231	Choline metabolism in cancer	0.62437	ENSRNOG00000022946	Slc22a3	NA	NA	solute carrier family 22 member 3 [Source:RGD Symbol;Acc:3701]	2.51101	2.61626	2.08064	1.64762	0.870144	0.759034	2.19968	1.13729	up
ko05231	Choline metabolism in cancer	0.62437	ENSRNOG00000047476	Wasf1	K05753	NA	WASP family member 1 [Source:RGD Symbol;Acc:1561954]	0.233252	0.315098	0.44101	0.118389	0.035382	0.132219	3.45942	1.79053	up
ko05231	Choline metabolism in cancer	0.62437	ENSRNOG00000051964	LOC108348190	K04357	NA	uncharacterized LOC108348190 [Source:RGD Symbol;Acc:11520363]	0.212498	0.315292	0.147029	0.358931	0.514377	0.568232	0.468124	-1.09504	down
ko05231	Choline metabolism in cancer	0.62437	ENSRNOG00000054371	Prkcg	K19663	EC:2.7.11.13	protein kinase C, gamma [Source:RGD Symbol;Acc:3397]	1.53377	1.93347	1.8286	3.48216	4.70262	3.15826	0.46688	-1.09888	down
ko05215	Prostate cancer	0.62437	ENSRNOG00000000521	Cdkn1a	K06625	NA	cyclin-dependent kinase inhibitor 1A [Source:RGD Symbol;Acc:69328]	60.966	98.6015	55.2437	36.6148	37.2161	27.4646	2.12064	1.0845	up
ko05215	Prostate cancer	0.62437	ENSRNOG00000002244	Pdgfra	K04363	EC:2.7.10.1	platelet derived growth factor receptor alpha [Source:RGD Symbol;Acc:3284]	10.7913	10.4928	10.1398	22.5292	21.8926	24.1598	0.458196	-1.12596	down
ko05215	Prostate cancer	0.62437	ENSRNOG00000005639	Ar	K08557	NA	androgen receptor [Source:RGD Symbol;Acc:2147]	0.44139	0.578004	0.220709	1.04348	0.79231	1.11291	0.420559	-1.24962	down
ko05215	Prostate cancer	0.62437	ENSRNOG00000014786	Ccne1	K06626	NA	cyclin E1 [Source:RGD Symbol;Acc:2294]	1.62725	1.32867	1.53513	0.320929	0.475594	0.655549	3.09286	1.62894	up
ko05215	Prostate cancer	0.62437	ENSRNOG00000017539	Mmp9	K01403	EC:3.4.24.35	matrix metallopeptidase 9 [Source:RGD Symbol;Acc:621320]	0.708985	0.326444	0.167858	0.688657	1.06294	1.59762	0.359274	-1.47684	down
ko05215	Prostate cancer	0.62437	ENSRNOG00000018461	Pdgfrb	NA	NA	platelet derived growth factor receptor beta [Source:RGD Symbol;Acc:3285]	29.9477	33.1625	27.8463	12.2108	11.6934	13.6546	2.42171	1.27603	up
ko05215	Prostate cancer	0.62437	ENSRNOG00000027042	Srd5a2	K12344	EC:1.3.1.22	steroid 5 alpha-reductase 2 [Source:RGD Symbol;Acc:621480]	0.537245	0.386602	0.075472	0.095092	0.074204	0.030068	5.01253	2.32554	up
ko05215	Prostate cancer	0.62437	ENSRNOG00000051964	LOC108348190	K04357	NA	uncharacterized LOC108348190 [Source:RGD Symbol;Acc:11520363]	0.212498	0.315292	0.147029	0.358931	0.514377	0.568232	0.468124	-1.09504	down
ko04310	Wnt signaling pathway	0.632925	ENSRNOG00000003172	Serpinf1	K19614	NA	serpin family F member 1 [Source:RGD Symbol;Acc:631369]	45.6714	23.7715	24.3167	5.34695	3.41355	6.33342	6.21175	2.635	up
ko04310	Wnt signaling pathway	0.632925	ENSRNOG00000007078	Ccn4	K22471	NA	cellular communication network factor 4 [Source:RGD Symbol;Acc:69431]	0.981429	0.637733	1.09487	0.0284343	0	0.0276873	48.3598	5.59574	up
ko04310	Wnt signaling pathway	0.632925	ENSRNOG00000014385	Wnt2b	K00182	NA	Wnt family member 2B [Source:RGD Symbol;Acc:69346]	1.93844	1.91525	1.50408	7.62981	5.39889	3.48382	0.324467	-1.62386	down
ko04310	Wnt signaling pathway	0.632925	ENSRNOG00000015618	Wnt5a	K00444	NA	Wnt family member 5A [Source:RGD Symbol;Acc:69250]	7.40085	6.90616	6.99221	3.0348	2.5955	2.2052	2.7183	1.4427	up
ko04310	Wnt signaling pathway	0.632925	ENSRNOG00000015750	Wnt7b	K00572	NA	Wnt family member 7B [Source:RGD Symbol;Acc:1311441]	1.76975	1.41713	2.20033	0.207026	0.670733	0.684039	3.44937	1.78633	up
ko04310	Wnt signaling pathway	0.632925	ENSRNOG00000016103	Nkd2	K03213	NA	NKD inhibitor of WNT signaling pathway 2 [Source:RGD Symbol;Acc:1311459]	10.8553	12.6917	12.7366	5.29418	6.23578	5.7001	2.10583	1.07439	up
ko04310	Wnt signaling pathway	0.632925	ENSRNOG00000016313	Ctnnbip1	K04493	NA	catenin, beta-interacting protein 1 [Source:RGD Symbol;Acc:1562749]	6.70643	5.83278	5.53926	3.61738	2.30967	2.69209	2.09748	1.06866	up
ko04310	Wnt signaling pathway	0.632925	ENSRNOG00000018712	Camk2a	K04515	EC:2.7.11.17	calcium/calmodulin-dependent protein kinase II alpha [Source:RGD Symbol;Acc:2261]	0.637376	1.01802	0.591485	1.83401	1.77662	1.39807	0.448596	-1.15651	down
ko04310	Wnt signaling pathway	0.632925	ENSRNOG00000022784	Fzd10	K02842	NA	frizzled class receptor 10 [Source:RGD Symbol;Acc:1583825]	0.099555	0.232361	0.089789	0.016885	0.017521	0.023113	7.33158	2.87412	up
ko04310	Wnt signaling pathway	0.632925	ENSRNOG00000033119	Plcb4	K05858	EC:3.1.4.11	phospholipase C, beta 4 [Source:RGD Symbol;Acc:3345]	7.14989	7.94063	6.17429	13.1434	15.847	14.3553	0.490587	-1.02742	down
ko04310	Wnt signaling pathway	0.632925	ENSRNOG00000053232	Ror2	K05123	EC:2.7.10.1	receptor tyrosine kinase-like orphan receptor 2 [Source:RGD Symbol;Acc:1305275]	3.70282	3.30952	2.45836	0.93753	0.843785	1.20048	3.17618	1.66729	up
ko04310	Wnt signaling pathway	0.632925	ENSRNOG00000053945	Daam2	K04512	NA	dishevelled associated activator of morphogenesis 2 [Source:RGD Symbol;Acc:1306128]	10.1365	10.6853	9.54086	4.13735	4.05409	3.79751	2.53255	1.34059	up
ko04310	Wnt signaling pathway	0.632925	ENSRNOG00000054371	Prkcg	K19663	EC:2.7.11.13	protein kinase C, gamma [Source:RGD Symbol;Acc:3397]	1.53377	1.93347	1.8286	3.48216	4.70262	3.15826	0.46688	-1.09888	down
ko04152	AMPK signaling pathway	0.637958	ENSRNOG00000000165	Pfkfb1	K19028	3.1.3.46;EC:2.7.1.105	6-phosphofructo-2-kinase/fructose-2,6-biphosphatase 1 [Source:RGD Symbol;Acc:3307]	1.11783	0.881053	0.727267	2.39751	2.64934	3.50647	0.318724	-1.64962	down
ko04152	AMPK signaling pathway	0.637958	ENSRNOG00000001389	Irs3	K17445	NA	insulin receptor substrate 3 [Source:RGD Symbol;Acc:69317]	2.43177	2.38892	1.71038	5.37503	4.18174	3.98315	0.482357	-1.05183	down
ko04152	AMPK signaling pathway	0.637958	ENSRNOG00000004473	Ppargc1a	K07202	NA	PPARG coactivator 1 alpha [Source:RGD Symbol;Acc:620925]	0.699099	0.733841	0.380414	1.49528	2.21646	2.7585	0.280261	-1.83516	down
ko04152	AMPK signaling pathway	0.637958	ENSRNOG00000009522	Adra1a	NA	NA	adrenoceptor alpha 1A [Source:RGD Symbol;Acc:2055]	0.443506	0.522418	0.301567	0.884054	1.07486	0.934857	0.438007	-1.19097	down
ko04152	AMPK signaling pathway	0.637958	ENSRNOG00000015423	Ccna2	K06627	NA	cyclin A2 [Source:RGD Symbol;Acc:621059]	6.5068	6.18522	6.15328	1.41045	1.83379	1.7034	3.80895	1.92939	up
ko04152	AMPK signaling pathway	0.637958	ENSRNOG00000017226	Slc2a4	K07191	NA	solute carrier family 2 member 4 [Source:RGD Symbol;Acc:2711]	1.77573	2.8625	1.51947	0.725115	0.747971	0.866538	2.63192	1.39612	up
ko04152	AMPK signaling pathway	0.637958	ENSRNOG00000017597	Fbp1	K03841	EC:3.1.3.11	fructose-bisphosphatase 1 [Source:RGD Symbol;Acc:2595]	0.440079	0.319562	0.185471	2.73069	2.42502	2.11469	0.129995	-2.94348	down
ko04152	AMPK signaling pathway	0.637958	ENSRNOG00000018851	Ppp2r2b	K04354	NA	protein phosphatase 2, regulatory subunit B, beta [Source:RGD Symbol;Acc:631441]	3.16847	2.77345	3.60839	1.62792	1.1151	0.816664	2.68291	1.4238	up
ko04152	AMPK signaling pathway	0.637958	ENSRNOG00000023664	Lepr	K05062	NA	leptin receptor [Source:RGD Symbol;Acc:3001]	1.64218	1.61979	1.27077	3.58304	4.59652	3.2965	0.394973	-1.34017	down
ko04152	AMPK signaling pathway	0.637958	ENSRNOG00000055103	Cftr	K05031	EC:5.6.1.6	cystic fibrosis transmembrane conductance regulator [Source:RGD Symbol;Acc:2332]	3.08251	3.45411	2.56982	1.14851	0.941143	0.718715	3.2426	1.69715	up
ko04977	Vitamin digestion and absorption	0.640263	ENSRNOG00000013932	Rbp2	K14622	NA	retinol binding protein 2 [Source:RGD Symbol;Acc:3544]	0.38293	0.518552	0.284511	0	0.068856	0	17.2243	4.10637	up
ko04977	Vitamin digestion and absorption	0.640263	ENSRNOG00000029047	Cubn	K14616	NA	cubilin [Source:RGD Symbol;Acc:68355]	0.177492	0.151215	0.11754	0.324175	0.252624	0.366809	0.472915	-1.08035	down
ko00534	Glycosaminoglycan biosynthesis - heparan sulfate / heparin	0.640263	ENSRNOG00000015781	Ndst3	K02578	2.8.2.-;EC:3.1.1.-	N-deacetylase and N-sulfotransferase 3 [Source:RGD Symbol;Acc:1310960]	0.431496	0.427179	0.250883	0.048146	0	0.015921	17.3187	4.11426	up
ko00534	Glycosaminoglycan biosynthesis - heparan sulfate / heparin	0.640263	ENSRNOG00000030880	Hs6st2	K08102	EC:2.8.2.-	heparan sulfate 6-O-sulfotransferase 2 [Source:RGD Symbol;Acc:1564397]	1.64491	1.22788	1.62933	0.761089	0.743889	0.689481	2.05159	1.03674	up
ko05224	Breast cancer	0.640663	ENSRNOG00000000521	Cdkn1a	K06625	NA	cyclin-dependent kinase inhibitor 1A [Source:RGD Symbol;Acc:69328]	60.966	98.6015	55.2437	36.6148	37.2161	27.4646	2.12064	1.0845	up
ko05224	Breast cancer	0.640663	ENSRNOG00000008030	Shc2	K17447	NA	SHC adaptor protein 2 [Source:RGD Symbol;Acc:1307137]	1.08558	1.2228	0.495709	1.31078	2.86654	1.98796	0.45482	-1.13663	down
ko05224	Breast cancer	0.640663	ENSRNOG00000011593	Hey1	K09091	NA	hairy/enhancer-of-split related with YRPW motif 1 [Source:MGI Symbol;Acc:MGI:1341800]	12.5876	14.407	11.9215	28.1001	20.3722	34.2301	0.470556	-1.08756	down
ko05224	Breast cancer	0.640663	ENSRNOG00000013364	Hey2	K09091	NA	hes-related family bHLH transcription factor with YRPW motif 2 [Source:RGD Symbol;Acc:621405]	2.33568	1.53529	1.36085	3.7966	3.34229	4.01539	0.469042	-1.09221	down
[truncated: 618 more rows]
