# Supplementary material for: Analysis of the Potential Relationship between Aging and Pulmonary Fibrosis Based on Transcriptome
Source: Life (Basel). 2022 Nov 23;12(12):1961. doi: 10.3390/life12121961 (PMC9788318; doi:10.3390/life12121961)
Supplement: Supplementary file 1 [file life-12-01961-s001.zip › Table S7-Heatmap of Figur 4B.xlsx]

## Sheet: Sheet 1
	Relative mRNA expression
	o-PF1	o-PF2	o-PF3	o-Sham1	o-Sham2	o-Sham3	y-PF1	y-PF2	y-PF3	y-Sham1	y-Sham2	y-Sham3
Slc26a4	1.33755	1.195	1.5351	-0.344371	-0.541726	-0.910006	-0.0660971	0.474915	0.592862	-0.983891	-1.23476	-1.05459
Thbs2	1.4584	1.02103	1.41416	-0.914853	-1.19008	-1.12057	-0.0295288	0.64081	0.740742	-0.686683	-0.689255	-0.644172
Hmox1	1.94193	0.874145	1.66933	-0.504902	-0.608998	-0.545853	-0.410483	0.240981	0.0584159	-1.06974	-0.70554	-0.939282
Lcn2	1.41907	0.854089	1.78387	-0.334816	-0.651164	-0.617873	0.064475	0.66626	0.124376	-1.22135	-1.15259	-0.934355
Cemip	1.13746	1.10051	1.59255	-1.47945	-0.842117	-0.838849	0.502852	0.810099	0.0750205	-0.754381	-0.760439	-0.543258
Ccl2	1.67491	1.19807	1.74728	-0.722275	-0.577755	-0.107132	-0.760091	0.0629405	0.0772286	-0.912105	-0.898508	-0.782571
TSham	1.4751	1.05808	1.7094	-0.922927	-1.22208	-1.0649	-0.122435	0.574547	0.10104	-0.407138	-0.79851	-0.380163
Ltbp2	0.687434	0.909439	0.916286	-1.59247	-1.29738	-1.26672	0.915601	1.30278	0.378933	-0.26199	-0.503893	-0.188014
Col1a1	1.31044	0.879355	0.395073	-1.3001	-1.38613	-1.34069	0.385073	1.04233	1.12948	-0.361991	-0.277792	-0.475057
Cyp2e1	-1.16491	-0.957951	-2.11593	0.48964	0.675393	0.892432	-0.107191	-0.260715	-0.244214	0.83038	0.994928	0.968142
Arg1	1.47332	0.953897	1.83097	0.139793	-0.117868	-0.365285	-0.571929	-0.0412254	0.162596	-1.23749	-0.982554	-1.24422
Nid1	0.519675	0.819623	0.384374	-1.55746	-1.49675	-1.32902	1.06552	1.27321	0.586428	0.396802	-0.3084	-0.353993
Ppp1r1b	-1.07355	-1.366	-1.43608	0.997159	1.17418	0.988	0.147062	-1.08735	-0.294152	0.56569	0.678027	0.707008
Chia	1.62293	1.41995	1.43408	-1.26791	-0.474197	-0.622826	-0.716418	0.0969137	0.46001	-0.86202	-0.523452	-0.567059
Fmo2	-1.24607	-1.12209	-2.2317	0.474968	0.672407	0.669838	0.285802	-0.148885	0.253931	0.860424	0.757616	0.773759
Cdo1	-1.42477	-1.20698	-1.98918	0.602716	0.722492	0.53376	0.1354	-0.321416	0.595337	0.708451	0.653879	0.990308
Gpnmb	1.18119	1.23414	0.863348	0.122636	-0.352945	-0.381584	0.117847	0.526206	0.874688	-1.28427	-1.18865	-1.71261
Slc15a2	-1.11873	-1.1061	-1.7905	0.868031	1.23564	1.02913	0.165122	-0.636541	-0.510838	0.912701	0.473073	0.479017
Tuba8	1.26597	1.31389	1.35508	-0.519497	-1.42652	-0.652763	0.413209	0.374415	0.580006	-0.951985	-0.964821	-0.78698
Gzma	-0.67951	-0.504218	-1.36395	1.07958	1.87578	1.21839	-0.723513	-0.882906	-0.681596	0.228099	-0.196259	0.630091
NEWGENE_621351	1.21766	0.801213	0.476362	-1.30295	-1.48957	-1.27887	0.248756	1.20751	1.03097	-0.549933	0.0895723	-0.450716
Serpine1	1.01255	1.22936	2.18402	-1.12571	-0.774588	-0.424717	-0.199294	-0.107627	-0.021092	-0.970028	0.00528821	-0.808165
Adamts4	1.26217	1.15768	1.66767	-0.698039	-1.35855	-1.14565	0.207216	0.346963	0.403865	-0.617456	-0.913848	-0.312026
Eln	0.978099	1.03901	0.743635	-1.24883	-1.34218	-1.31019	1.14101	1.19759	-0.1034	-0.58595	-0.016115	-0.492675
Col15a1	0.553116	1.01721	1.00148	-1.95946	-1.58557	-0.919765	0.685005	0.610903	0.595602	0.32412	-0.387836	0.0651958
Ankrd1	1.00459	1.00988	1.81118	-1.09187	-1.25552	-0.43555	0.143013	0.824715	0.255031	-0.664886	-0.451183	-1.14939
Slc25a33	-1.34719	-0.837014	-1.54006	-0.277873	-0.129371	0.191945	0.169335	-0.0599729	-0.336972	1.34581	1.26089	1.56046
Inmt	-1.80953	-1.24736	-1.38273	0.79244	0.824592	0.919442	0.304551	-0.470737	-0.0757382	0.40129	1.09878	0.644998
C4bpa	1.50569	0.770713	1.80552	-0.0468652	-0.180737	-0.385234	-0.417769	0.315232	0.170757	-0.938254	-1.55911	-1.03995
Mmp2	1.11512	0.544464	0.363789	-1.44232	-1.75607	-1.35213	0.567675	0.668432	1.17163	0.105685	-0.295105	0.30883
Olfml2b	1.17391	0.884849	1.32368	-0.989815	-1.50924	-1.53835	-0.0664347	0.598129	0.822614	-0.0684851	-0.647266	0.0163961
Tubb6	1.42694	1.22076	1.86703	-0.421338	-0.547099	-0.858042	-0.702619	0.267135	0.268079	-0.8554	-0.734468	-0.930963
Il6	0.660247	0.592285	0.871693	0.100539	0.099724	0.21156	0.0841078	0.0725911	-0.0600181	-3.04638	0.149133	0.264523
Pla2g2a	1.81401	0.983405	1.55603	0.370659	-1.12223	-0.79647	-0.134984	-0.490132	0.189022	-0.857194	-0.513432	-0.998676
Serpinb10	-1.44573	-1.47469	-1.37301	1.34898	0.809692	0.627372	0.414073	0.197545	-0.834922	0.56701	0.775341	0.388351
Klf15	-1.61299	-0.782726	-1.90988	-0.129493	0.199823	0.234527	0.721609	0.0667691	-0.0170134	1.10987	0.952958	1.16655
Heyl	0.164088	0.552068	-0.213415	-1.44112	-1.54423	-1.39223	1.65357	0.945966	0.436574	-0.0406213	0.526202	0.353149
Lif	1.22537	1.20141	1.95152	-0.82945	-0.362302	-0.421961	-0.0260396	0.131801	0.158515	-0.700289	-1.11598	-1.21259
Gli1	0.856566	0.638458	0.227511	-1.19776	-1.70887	-1.53254	0.792522	1.1744	1.02932	-0.115859	-0.01208	-0.15166
LOC299282	1.24237	0.880972	1.69645	-1.97985	-0.62154	-0.601746	-0.250766	0.261417	0.633021	-0.634986	-0.270475	-0.354871
Marco	1.66008	1.65494	1.65991	-0.55277	-0.55277	-0.55277	-0.55277	-0.55277	-0.55277	-0.55277	-0.55277	-0.55277
Ptprn	1.43883	0.975802	1.49085	-0.60104	-0.447305	-0.848641	0.106161	-0.0613303	0.878856	-0.413941	-1.67378	-0.844462
Scn3b	0.739503	1.12438	1.25779	-1.36071	-1.71357	-1.05873	0.821363	0.757408	-0.0936619	0.131155	-0.649483	0.0445693
Col6a1	0.802261	0.471967	0.141102	-1.6941	-1.76013	-1.1236	0.979366	1.13617	0.683243	0.128639	-0.129591	0.364682
Il24	1.4946	1.07556	1.94391	-0.483921	-0.941996	-0.952057	-0.443756	-0.45001	0.496918	-0.651941	-0.278981	-0.808325
Fbxo40	-0.105172	-3.05792	-0.289589	0.283555	0.337365	0.359809	0.242622	0.0991976	0.419175	0.627688	0.489918	0.593356
Fmo3	-1.32136	-1.05748	-2.22658	0.228252	0.425053	0.365607	0.287476	0.0738853	0.960772	0.522037	0.942033	0.800311
Trem2	1.45407	1.06105	1.15854	0.0806705	-0.770888	-0.64863	-0.346016	0.373902	1.0751	-1.2666	-1.18422	-0.986985
Acta1	1.12962	1.00037	1.64047	-0.606243	-0.861927	-0.39436	-0.0195455	0.485557	0.622702	-1.81695	-0.320544	-0.85915
Ccl9	1.2173	0.890547	1.38779	0.601895	-0.592163	0.103144	0.313635	-0.235139	0.351944	-1.1192	-1.08372	-1.83603
F3	0.958295	0.983432	2.16821	-0.844704	-0.894815	-1.17688	-0.258349	-0.107419	0.626111	-0.615378	-0.0232618	-0.81524
Ablim2	-1.38995	-0.645763	-0.996233	1.35487	1.67478	1.10207	-0.300948	-0.660646	-0.858509	0.35526	0.598792	-0.233713
Adamts12	0.452769	1.13559	0.515112	-1.76274	-1.55707	-1.08104	0.74882	1.23908	0.37071	0.2797	-0.461927	0.12101
Osmr	1.25762	0.854463	2.20052	-0.671865	-0.746572	-0.802728	-0.41906	0.472635	0.139227	-0.885831	-0.621843	-0.776572
Thbs1	0.78363	1.38024	1.98894	-0.964113	-0.969513	-0.551447	0.173156	0.465061	-0.453143	-0.876443	0.0841118	-1.06047
Gzmbl3	-0.12562	0.0798656	-0.739156	1.40483	1.57579	1.3712	-0.457649	-1.05727	-1.24672	-0.145536	-1.02781	0.36807
Ccl7	1.50064	1.29849	1.68373	-0.645466	-0.747218	0.00886214	-1.38088	-0.326488	0.347647	-0.730926	-0.310432	-0.697946
Timp1	1.27491	0.746382	2.1093	-0.685218	-1.04768	-0.917527	-0.178014	0.195498	0.0193172	-1.08956	0.338825	-0.766244
Idi1	1.26434	1.25255	2.11024	-0.911966	-0.720306	-0.650481	-0.840037	0.0731623	0.0468315	-0.630419	-0.472294	-0.521623
LOC108348074	0.235693	0.730675	0.923808	-1.49294	-1.8198	-0.930312	1.18493	1.21423	0.113521	0.0298132	-0.441906	0.252288
Krt76	-1.5983	-0.990664	-1.88007	0.13791	0.198794	0.0843806	0.0437541	0.279564	0.616088	0.711787	1.3107	1.08605
Krtap17-1	-1.53283	-1.50629	-1.5444	0.131404	0.354494	0.12599	0.518991	0.371643	-0.103365	0.961499	1.22173	1.00114
Sele	1.76145	0.8162	1.96177	-0.660221	-0.321136	-0.522494	-1.35339	-0.286395	-0.175582	-0.162398	-0.670597	-0.387217
Cpz	1.0362	0.558888	1.07553	-1.66918	-1.44674	-1.17091	0.454093	1.31792	0.22929	-0.455662	0.0590572	0.0114982
Col3a1	1.02262	0.699788	0.248135	-1.46287	-1.54353	-1.43341	0.175074	0.981902	1.17901	-0.289223	0.577378	-0.154866
Trpm5	-1.7901	-0.717582	-1.19192	0.199795	0.177746	0.719386	0.391722	-0.937759	-0.325428	1.27168	0.889544	1.31291
Mt2A	1.07581	0.77031	2.19643	-0.567987	-1.04647	-0.750365	-0.0186084	0.19035	0.599702	-0.996111	-0.728192	-0.724878
Klrd1	-0.790235	-0.300211	-1.59443	1.16921	1.73709	0.927701	-0.586877	-1.04129	-0.549268	0.43171	-0.150747	0.747345
Sstr1	-1.16983	-0.12607	-0.763277	1.15238	1.38907	1.54623	-0.672065	-0.940757	-1.3195	0.154305	0.408109	0.341412
Rnd1	1.7383	0.67764	2.07633	-0.077672	-0.91202	-0.0493527	-0.569114	-0.478901	-0.323889	-0.753127	-0.303344	-1.02486
Mab21l3	1.4913	1.09102	1.64194	-0.142972	-0.829287	-0.864491	-0.357704	-0.185229	0.875907	-0.905429	-1.04491	-0.770141
Fst	0.963476	0.810618	1.22481	-1.41012	-1.70903	-1.09571	0.617488	1.15611	-0.0573977	-0.167017	-0.172324	-0.160919
Col7a1	0.864908	0.478604	-0.369379	-1.45424	-1.14293	-1.80803	1.28102	0.765111	0.820099	0.483582	-0.132961	0.214205
Sfn	1.49326	1.00391	1.9281	-0.638042	-0.545028	-1.13868	-0.603879	-0.73349	0.625075	-0.682423	-0.224557	-0.484252
Tnfrsf12a	1.24779	1.04315	2.04315	-0.294531	-0.607531	-0.935555	-0.310697	-0.06042	-0.010299	-1.10053	0.20799	-1.22252
RGD1559482	1.63373	1.23799	1.25524	0.173015	-0.396355	-0.786474	-0.871146	-0.0631001	0.790795	-1.22322	-0.859209	-0.891268
Gch1	1.20904	0.938047	2.19257	-0.207299	-0.221514	-0.531528	-0.582118	0.2587	-0.0608034	-0.98937	-0.80719	-1.19853
Tac4	1.46332	1.47155	1.18097	-0.642474	-0.807329	-1.50067	0.504507	-0.296987	0.588898	-0.60088	-0.732364	-0.628542
Acta2	0.810987	0.845523	1.37684	-1.79	-1.50368	-1.02418	0.0774734	0.270921	0.672819	-0.00502057	-0.435711	0.704029
LOC498222	-1.56693	-1.22396	-1.62971	-0.0629172	0.558151	0.353788	1.0256	0.422023	-0.523743	1.08992	0.928128	0.629644
Frzb	1.06084	0.523112	1.20481	-1.53044	-0.990853	-1.17643	0.0233308	0.477361	1.61078	-0.350226	-0.683562	-0.16872
Ror2	0.904292	0.700796	0.162017	-1.58493	-1.77585	-1.13691	1.17064	0.814207	0.819324	-0.0323135	-0.0125047	-0.0287614
Tmem119	1.14578	1.01091	0.0758003	-1.43985	-1.34858	-1.53402	0.723245	1.29899	0.111982	-0.366365	0.109259	0.212855
Slfn4	-0.324699	-0.545444	-0.0439667	0.574311	1.00517	1.41138	-0.74055	-1.56825	-1.39083	0.807346	-0.409638	1.22519
Bcl3	1.54739	0.678067	2.20133	0.0854099	-0.284362	-0.765017	-0.4466	-0.365269	-0.211814	-0.86294	-0.426173	-1.15002
Prss22	1.38364	1.0595	1.66595	-0.244763	-1.12449	-1.12157	-0.8755	0.171018	0.82573	-0.301265	-0.755739	-0.682505
Dnase2b	0.0531379	0.0342382	0.151135	0.60392	0.51246	0.63792	-3.09209	0.0184673	0.0622218	0.362686	0.211765	0.444139
Bpifa1	0.401955	0.0901779	-0.929163	-0.665266	-0.274146	0.200734	-0.168624	-0.457752	2.90014	-0.55617	-0.660797	0.118908
PCOLCE2	-1.47178	-1.20734	-1.82363	0.652365	0.45822	0.592823	0.0631653	-0.517933	1.03111	0.78432	0.521721	0.916955
Ntrk2	0.695533	1.59165	1.64002	-1.46915	-0.684589	-0.904527	0.141877	-1.31993	0.212615	-0.0710947	-0.0195518	0.187145
Klri2	-0.829939	-0.349931	-1.49661	1.40935	1.56911	1.04817	-0.483226	-0.724598	-0.857185	0.246275	-0.373207	0.841789
Sec14l4	-1.26424	-1.03272	-1.90543	0.84063	0.927044	0.808871	-0.173264	-0.836513	0.61982	0.704309	0.739918	0.571574
Tfpi2	1.1897	1.06454	2.10682	-0.574242	-0.554863	-0.824306	-0.814638	0.144326	0.480854	-1.04197	-0.623063	-0.553154
Tef	-1.45281	-0.926578	-2.03976	-0.30555	0.302166	0.672453	-0.0699071	0.469122	0.676746	0.55842	1.07312	1.04257
Clca1	0.459983	0.266073	0.0927711	-1.14142	-0.769986	-0.638649	0.131914	-0.696312	2.59897	0.400415	-0.960374	0.256614
Folr2	1.57909	1.45694	1.20954	-0.38639	-1.09394	-0.469078	-0.448483	-0.193584	0.859384	-0.878488	-1.18446	-0.450511
Wnt5a	0.861851	0.703593	0.731921	-1.17741	-1.53511	-1.90789	0.31763	1.03229	0.161959	0.628576	-0.2544	0.437001
Etv4	0.118417	0.778363	0.119058	-1.60248	-1.4855	-1.45553	0.686354	1.40953	0.81557	-0.176232	0.444521	0.347927
Adcy1	-1.45326	-0.875982	-1.98739	0.474216	0.400626	0.60654	0.418782	-0.00605539	-0.492096	1.29154	0.725411	0.897675
AC120568	-2.04369	-0.444996	-1.08546	0.340488	0.219826	0.661207	0.367228	-0.755945	-0.578793	1.17179	0.825677	1.32268
Scn7a	0.686543	1.38633	0.361437	-1.40885	-1.83384	-1.10598	0.71792	0.71284	-0.560271	0.649819	0.381102	0.0129479
Crtac1	0.888075	0.623739	1.12322	0.268653	-0.286295	0.18411	0.522547	0.574156	0.552234	-0.800362	-1.53968	-2.11039
Zbtb16	-1.05052	-1.44624	-1.87111	0.231098	0.678316	0.714492	1.10748	-0.741684	0.66952	0.516534	0.399186	0.792928
Cpb2	0.617116	0.584788	0.631342	0.505105	0.524708	0.399917	0.564807	0.655498	0.479471	-1.65425	-1.65425	-1.65425
Fmo6	-1.42257	-1.65636	-1.09989	0.248986	0.184229	0.171117	0.404607	-0.287649	1.94131	0.228941	0.614448	0.67283
Klrg1	-1.08384	-0.360548	-1.61383	1.0864	1.64055	0.949707	-0.107037	-0.793366	-0.94256	0.415473	0.0250432	0.784017
Atp1a2	-1.36093	-0.732953	-2.21215	0.284588	0.348467	0.409076	0.185599	-0.388087	0.924349	0.851324	0.568058	1.12266
Ebna1bp2	1.73609	0.956344	1.8334	-0.728312	-0.640612	-0.943275	-0.808719	-0.987563	-0.285838	-0.356103	0.0217329	0.202852
Map3k6	-1.51453	-1.29591	-1.18473	-0.279478	0.557235	0.358902	0.980557	-0.552652	-0.384385	0.97039	1.15108	1.19352
Egflam	0.319707	0.673405	-0.0592108	-1.74295	-1.77393	-0.830846	1.00241	1.36851	0.350281	0.325233	-0.25915	0.626533
Nid2	0.522794	0.550195	0.142336	-1.61036	-1.61967	-1.3119	0.815216	0.664935	0.83627	0.742205	-0.59854	0.86652
Angpt2	0.721509	0.592271	0.0216732	-1.50909	-1.68191	-1.4789	0.596408	1.38505	0.160756	0.420316	0.212259	0.559656
St6galnac1	1.50125	1.1672	1.5423	-0.673178	-0.673178	-0.673178	-0.673178	1.17467	-0.673178	-0.673178	-0.673178	-0.673178
Slc7a11	1.55371	1.39028	1.54301	-0.402603	-0.638421	-0.419856	-0.758064	-0.627605	0.591246	-0.638676	-1.31195	-0.281077
Armcx2	0.670354	0.616711	0.0666065	-1.53094	-1.95242	-1.07656	0.77831	1.36569	0.487966	0.280928	0.247145	0.0462087
Krt15	-1.07709	-0.741578	-1.12872	-0.062286	-0.197436	-0.379393	0.502005	-0.308313	2.69749	0.403684	0.153237	0.138399
Esm1	-1.54454	-1.22692	-1.29977	0.943639	0.750841	0.970685	0.523192	-0.235857	-0.792571	0.575497	1.31686	0.0189578
Pkib	1.36112	1.26773	1.71533	0.196215	-0.165202	-0.696769	-0.880316	-0.894313	0.497148	-0.391837	-0.841982	-1.16713
Sod2	1.56636	0.249876	2.36379	-0.277399	-0.356722	-0.509003	-1.17171	-0.27731	0.105546	-0.613252	-0.620316	-0.459868
Hmgcs2	-1.10986	-0.874709	-2.42681	0.529318	0.271315	0.514935	0.741563	-0.189078	0.292607	0.754148	0.488632	1.00794
AABR07006278	-0.538636	-0.850926	-0.93561	1.25369	1.18801	1.32988	-1.40538	-1.3726	0.184776	0.465468	0.432044	0.249293
Fam107a	-0.835125	-1.31841	-2.0411	0.496939	1.1842	0.811999	0.174568	-0.519861	0.360235	1.14854	0.581459	-0.0434409
Scube2	-1.71979	-0.876118	-1.5063	0.00555072	0.505873	0.534724	0.47589	-0.328907	-0.114429	1.83263	0.751224	0.439655
Noxo1	1.73795	0.556773	1.98269	0.161108	0.143777	-0.63734	-0.475328	-0.649216	-1.40139	-0.487024	-0.428696	-0.50331
Lamc3	-1.25459	-1.18763	-1.71604	-0.366365	-0.300992	0.116367	1.5248	0.301084	0.604559	0.829179	0.329205	1.12042
Nkx2-8	0.0718569	0.192789	0.497154	1.66349	1.52796	0.815289	-0.800481	-1.09956	-0.915274	-1.25355	0.119352	-0.819026
Flrt2	0.776827	0.528594	2.2406	-1.15462	-0.948041	-1.57564	-0.0336912	0.456506	-0.277258	-0.247944	0.175906	0.0587548
Erbb4	-0.787491	-0.632655	-1.61655	1.12996	1.46495	1.5158	-0.16476	-0.450506	-1.11472	0.164857	0.358148	0.132968
Rprml	-1.62914	-0.802276	-1.9069	0.309968	0.375468	0.215729	0.680732	-0.14257	-0.149969	0.717941	1.31372	1.01729
Gsn	-1.16669	-1.048	-1.89673	0.552409	0.244318	0.585457	0.279588	-1.00748	0.613368	1.01391	0.736435	1.09342
Selenbp1	-1.38808	-1.02476	-1.89607	0.191588	0.801726	0.559397	-0.324904	-0.35719	1.05675	1.14896	0.561422	0.67116
Bcat1	1.79657	0.758922	1.66626	-0.591074	0.0101851	-0.787643	-0.705611	-0.46233	0.746482	-1.17354	-0.550216	-0.708003
Armh4	0.212307	0.531104	0.111414	-1.32174	-1.78167	-1.42128	1.28697	1.16329	0.618914	0.510572	-0.130606	0.220726
Gzmbl1	0.361549	0.369919	-2.10465	0.630847	0.751265	0.666814	0.322084	0.131721	-2.10465	0.403605	0.188202	0.383296
C1s	1.51905	0.848501	1.5093	-0.497792	-0.941939	-1.18758	-0.940548	0.446329	0.613615	-0.95046	0.381455	-0.799934
Card14	0.936166	0.635333	0.55355	0.356082	-0.0636044	0.0631225	0.290098	0.719143	1.03823	-1.27561	-1.04193	-2.21058
Slurp1	1.72444	0.79274	1.68253	-0.947115	0.249584	0.116872	-1.13933	0.263725	-0.229299	-1.04179	-0.68844	-0.783913
Brinp2	0.692907	0.698878	1.20205	-2.0069	-1.61888	-0.803554	0.568778	0.868506	-0.0908292	-0.0448205	0.0911031	0.442766
Cldn11	0.808045	0.539335	0.598029	-1.57769	-1.4605	-1.46561	0.89598	1.23191	-0.246415	-0.272317	0.58087	0.368356
Tent5b	-1.48662	-1.19499	-1.23829	-0.586278	0.46743	0.371403	1.07979	0.436276	-0.812327	0.78213	1.33686	0.844607
Tm4sf19	2.02007	0.628872	1.19053	0.197923	0.219405	-0.111138	-0.0236469	0.0670253	-0.722959	-1.53092	-0.604987	-1.33017
Mnda	1.76174	0.663792	1.88914	-0.107355	-0.792687	-0.743751	-0.671144	-1.07616	0.479385	-0.79892	-0.170314	-0.433724
Fkbp5	-1.3254	-1.39752	-1.25011	-0.352321	0.205343	0.119112	1.38781	-0.638928	0.623106	0.444048	0.745636	1.43922
Gnat3	-1.71612	-0.370276	-1.12288	0.173261	-0.0354594	0.511489	0.334953	-0.572462	-0.997929	1.35284	0.981502	1.46108
Cela3b	0.810243	0.649578	0.676333	0.487173	0.431395	-1.64611	0.444317	0.484998	0.586071	-1.64611	-1.64611	0.368209
C9	0.902159	0.637228	0.663989	-1.50344	-1.04631	-1.54604	-0.155609	0.350796	1.70681	0.329176	-0.598108	0.25935
Cxcr1	0.383082	-0.0725406	0.672758	1.1821	0.913559	0.598915	0.632382	0.670198	-0.654587	-1.05796	-1.81874	-1.44916
Slc4a1	-1.19136	-0.991646	-1.39187	-0.91198	-0.0388101	-0.0513472	0.201555	0.575905	1.19492	0.117524	0.566314	1.9208
Aldh1l2	0.684343	0.564933	0.638134	-2.11056	0.104522	0.250399	0.317075	0.49575	0.512252	-2.11056	0.340006	0.313714
Olr59	1.23793	0.981956	1.50933	-0.810342	-1.84663	-1.15488	0.146542	0.161568	0.58213	-0.298572	-0.585897	0.0768563
Akr1c19	-1.30281	-0.936388	-2.24469	0.695406	0.333717	0.475084	-0.110409	0.234888	0.313008	0.484342	0.871945	1.1859
Krt8	1.1249	0.505277	2.63155	-0.314066	-0.318455	-0.669433	-0.887022	-0.389014	-0.256392	-0.678299	-0.0902932	-0.658749
Pcdh7	0.765322	0.854414	1.49274	-1.21819	-1.66567	-1.31121	-0.0449374	0.849645	0.0509402	-0.360558	0.767658	-0.180146
Pfkfb1	-1.17516	-1.55122	-1.85429	0.0303883	0.188187	0.631041	0.983733	-0.192479	0.451522	0.643732	0.834166	1.01039
Foxs1	1.59231	0.9817	1.67274	-0.0252764	-0.0274907	-0.646065	-0.0510668	0.2921	-0.794891	-1.48263	-0.421227	-1.09021
S100a9	1.31663	0.352784	0.688099	0.797383	-0.136474	0.966139	-1.56451	-1.15631	-1.37505	-0.27421	-0.599612	0.985121
Selp	1.32646	0.704772	2.1458	-0.325465	-0.172559	-0.26546	-1.22397	0.125309	0.0676348	-0.769584	-0.295723	-1.31722
LOC103689947	-0.921472	-1.22201	-1.9545	0.590543	0.266393	0.289401	-0.0667094	-0.672482	1.16396	0.547521	0.626464	1.35289
Adhfe1	-1.08932	-0.89534	-2.19204	-0.00609094	0.674667	0.64896	0.505078	-0.682535	0.414298	0.984342	0.566701	1.07128
Tbx18	1.06204	0.873459	1.03419	0.564993	0.112909	0.139653	-0.862903	0.947868	0.315211	-1.37897	-1.18011	-1.62834
Adrb3	0.502186	0.312955	0.561786	-1.63994	-1.63994	-1.63994	0.536924	0.531782	0.879942	0.467637	0.379681	0.746912
Asb15	-0.389808	-1.36736	-2.02544	-0.965994	0.301468	0.339837	0.442899	0.151397	0.518508	1.25963	0.587283	1.14758
RGD1562667	-0.424821	-0.545989	-1.20626	0.951866	1.98228	1.01888	-0.245437	-0.590456	-1.39316	0.395808	-0.556452	0.61374
Pdgfrl	1.18689	0.580228	-0.0218162	-1.56602	-1.38308	-1.13952	0.228549	0.88396	1.54401	-0.286043	-0.394732	0.367577
Wnk2	-1.0862	-0.590094	-1.8334	0.9256	1.21047	1.28186	0.373689	-1.20918	0.617348	0.379998	-0.123737	0.0536484
Tlr5	-0.835879	-0.782772	-1.11536	0.0932245	-0.111384	-1.05016	1.75833	0.78334	1.85011	-0.377271	-0.223398	0.0112195
Cd79a	-1.11266	-0.854722	-2.19152	0.243583	0.733671	0.783864	0.346826	-0.488707	0.308392	0.507411	0.221983	1.50188
Kcnj4	-1.11851	-1.16117	-2.24828	0.230305	0.668198	0.583015	0.944605	0.476363	-0.321023	0.703714	0.530086	0.712703
Gabrp	1.03964	0.705919	0.559472	-1.83676	-1.25529	-0.774952	-0.195351	0.125033	1.85277	-0.0251612	-0.258244	0.0629083
Itgb8	1.57063	0.857551	2.00232	-0.10192	0.159889	-0.815267	-0.264173	-0.239419	-1.21144	-0.738468	-0.290528	-0.929182
Inhba	1.56444	1.15938	1.02937	-0.167927	-1.27299	-1.91945	-0.343823	0.55834	0.0365818	-0.0378372	0.0126948	-0.618777
Scara5	1.52045	0.646042	0.125704	-1.20973	-1.55986	-0.86067	-0.0513293	0.284082	1.70593	-0.142379	-0.728565	0.270321
Clnk	-0.512578	-0.368139	-1.76265	0.795547	1.8528	1.08477	-0.202327	-1.30342	0.0552834	0.201887	-0.398091	0.556925
S100a8	1.19363	0.0587419	0.675955	0.971512	0.273136	0.620154	-1.85736	-0.756991	-1.66851	-0.00759266	-0.376388	0.873717
Myh7	-2.04017	-0.00209774	-2.04017	0.70558	0.10859	0.493962	0.183106	0.186769	1.08316	0.509536	0.192448	0.619278
Fam13a	-1.21206	-1.02669	-1.91144	0.326734	0.592103	0.485309	0.215764	-0.735611	1.06405	1.45339	0.469344	0.279103
Sbsn	2.23701	0.381303	1.38384	0.0873535	0.129658	-0.867809	-0.274123	-0.0677628	-0.0964823	-0.573786	-1.12703	-1.21217
Syt13	1.4843	0.640232	1.49198	0.25026	-0.654497	-1.62792	-0.35336	0.722037	0.176868	-0.8197	-0.017865	-1.29233
Doc2b	-1.44488	-1.28256	-1.4311	-0.418284	0.235867	1.10374	0.273714	0.156012	-0.343151	0.939232	1.442	0.769394
Mreg	1.41143	0.930522	0.818053	-0.637325	0.446458	0.35824	-0.778127	0.195497	1.05084	-1.40898	-1.4742	-0.91241
Aox3	-1.22495	-0.966718	-1.92411	0.385808	0.427242	0.805322	0.0105701	-0.8998	1.11516	0.817618	0.498776	0.955088
Ppargc1a	-1.19195	-1.11133	-2.20352	0.0718706	0.726151	1.08983	0.118761	0.263908	0.0813354	0.91723	0.807092	0.430624
Col23a1	-1.2479	-1.84541	-1.28595	1.02306	0.482635	0.648811	0.687138	0.43808	-0.832667	0.697691	0.421309	0.813207
Galnt14	-0.837536	-0.479308	-0.27471	1.16722	1.33988	1.36354	-0.0383457	-1.98079	0.197696	-0.241065	0.573898	-0.790474
Ccl12	0.715033	0.603747	0.608917	-2.11351	0.164736	0.426497	0.284044	0.476547	0.364021	0.291736	-2.11351	0.291751
Tchh	1.03554	0.143176	0.627274	0.0843898	0.300561	-0.0852876	1.46253	0.949521	-0.283312	-1.04731	-1.35638	-1.8307
Sptb	-1.40473	-1.28541	-1.50033	-0.14253	0.15716	0.440512	0.0626413	-0.352475	1.03508	1.10538	0.356284	1.52842
LOC103690116	-1.44204	-0.90273	-2.28744	0.546108	0.410303	0.26238	0.223238	0.623998	0.856742	0.361164	0.924334	0.423947
Has2	0.591978	0.510228	0.543545	0.249915	0.0471869	-0.118666	0.283496	0.287674	0.388049	-3.10575	0.118165	0.204176
Gem	0.807286	1.49192	1.81214	-0.712495	-0.537081	-0.235791	-0.761623	-0.601803	0.364017	-1.4432	0.545717	-0.729074
LOC100362027	0.510738	1.06901	0.455286	1.19197	-0.615246	0.986643	-1.86024	-1.07198	-0.789693	0.566686	0.47257	-0.915755
Omd	-1.48051	-0.99038	-2.09749	0.458058	-0.130504	0.436019	0.317438	0.249989	1.03375	0.566589	1.06138	0.575665
Cpvl	-1.66595	-0.519864	-1.77851	-0.582894	0.20463	0.234422	0.464833	0.985832	-0.316372	0.751421	0.984076	1.23838
Lax1	-1.21587	-0.902777	-2.04037	0.575435	0.435144	0.276244	0.498083	-0.409011	0.848907	-0.25959	0.686449	1.50736
Dhfr	1.25112	1.20628	1.62676	-0.387621	-0.246084	-0.141692	-0.438147	-1.02717	0.477376	-0.760443	0.176821	-1.7372
Itga11	0.818664	-0.568032	0.183744	-1.9516	-1.51168	-0.668766	1.40052	0.906335	0.54992	0.512155	0.288	0.0407378
Slc6a7	-0.811672	-0.909818	-0.425195	1.89731	1.5407	0.31686	-0.136336	-0.0154381	-1.6667	0.61169	-0.261053	-0.140343
Avpr1a	-1.32396	-1.10804	-2.10956	0.488633	0.476239	0.650462	-0.157329	0.518765	0.0276619	1.09164	0.449374	0.996116
Cftr	0.94943	1.15986	0.613105	-0.8759	-1.24406	-1.74256	-0.705101	0.231403	1.23088	0.495736	0.538619	-0.651418
Pax8	0.697342	0.863733	1.0114	0.366083	0.275662	0.27518	0.0222782	-0.0436152	0.951822	-1.49503	-0.741962	-2.18289
Add2	-1.6233	-0.908542	-1.7201	-0.0584425	-0.0650683	0.354932	-0.181351	0.815889	0.73155	0.314308	0.736192	1.60393
Greb1	0.242021	0.277169	0.320499	0.133327	0.117527	-3.14242	0.413875	0.475185	0.565728	0.0961651	0.293159	0.207764
Cytl1	-1.04548	-0.712824	-2.18171	0.474319	0.0902134	0.106282	-0.0748588	-0.517739	1.50734	0.762377	0.807642	0.784441
Pgf	0.185175	0.219873	0.740195	-1.24858	-1.30472	-1.30442	1.55244	1.19725	-0.585483	-0.646117	0.809002	0.385383
Defb3	0.615543	0.558879	0.591168	0.383021	0.327387	0.27722	0.31334	0.389432	0.446495	0.353033	-2.12776	-2.12776
Cox8b	-0.0657221	0.090557	-3.13877	0.246636	0.308659	0.341252	0.226826	0.348509	0.504328	0.335301	0.374736	0.42769
Ryr2	0.175403	0.286141	-0.293702	-0.214228	-2.2688	-0.120227	0.546397	0.591105	1.98353	0.113503	-0.982116	0.182997
LOC100365958	-0.0477119	-1.49645	-0.758415	1.34876	1.38426	1.71163	-0.382651	-1.05676	0.0252153	-0.452213	-0.0607694	-0.214885
Rundc3a	0.768872	0.674257	0.530608	-1.24656	-1.99663	-1.29239	1.38485	0.0970528	0.401652	0.00719941	0.0633401	0.607739
AABR07030791	1.19562	0.226578	1.34554	-0.132274	0.481855	0.292608	-0.337339	0.223657	0.991861	-1.40741	-1.22153	-1.65917
Prune2	0.657975	0.667461	-0.103446	-1.68409	-1.20626	-1.18773	0.79766	1.23713	-0.465173	0.656922	-0.520713	1.15026
Garem2	-1.6011	-0.743082	-1.91459	-0.225529	0.459091	0.391615	0.873985	-0.370546	0.370735	1.30876	0.725894	0.724771
Kcna6	-0.72327	-0.660536	-1.61512	0.578245	1.52189	1.47945	-0.117411	-1.38234	0.76373	0.237437	0.0707346	-0.152809
Stk32b	0.259168	0.31773	0.324947	-3.1371	0.047544	-0.0225847	0.565743	0.426528	0.240062	0.284758	0.370741	0.322462
Aff3	-1.34479	-0.89721	-1.96221	0.502412	0.651161	1.10294	1.04127	-0.00615705	-0.0804155	1.13258	-0.430438	0.290851
Ereg	0.491798	1.13712	1.56911	0.335927	0.332108	0.317081	-0.590181	-0.709232	-0.511624	-1.0085	0.663458	-2.02706
Atp7b	-0.703982	-1.58596	-1.27157	-0.1352	0.353898	-0.00897154	-0.0685294	-0.696003	2.00511	0.99512	0.327843	0.788241
Adtrp	1.24165	0.864322	2.26423	-0.535861	-0.567621	-1.23442	-0.53557	0.190368	-0.25307	-0.696962	-0.760233	0.0231595
Fam163a	-2.15342	-1.65537	-0.540784	0.0978753	0.00437995	0.281756	0.811354	0.395826	0.49467	0.409975	1.31101	0.542732
Slco1a1	0.518163	0.351179	0.741448	0.141549	0.605448	0.370174	0.301098	0.970096	0.51825	-1.36492	-0.738869	-2.41362
Chst13	-1.53836	-1.02699	-1.42546	0.0889739	0.789438	-0.092751	1.45232	0.42443	-0.902104	0.986403	0.790874	0.453232
Aldh3a1	-1.21622	-0.721065	-1.48296	0.660244	0.370858	0.533295	-0.33121	-0.147758	2.27328	-0.22306	-0.384141	0.668735
AABR07044080	0.90525	0.884126	2.15467	0.539398	-0.469026	-0.718425	-1.43423	-0.215086	-0.711559	-0.56247	0.419393	-0.792043
LOC100359600	0.624599	1.55888	1.59023	0.291434	-0.287617	-1.71983	-0.603367	-1.43041	0.269547	-0.0692783	-0.191967	-0.0322297
St18	-1.11246	-0.0708697	-0.846738	-0.663681	0.311477	-0.0412266	-0.18025	-1.41146	-0.254827	1.78565	1.50387	0.980523
Nat8l	0.208301	0.363612	-0.364862	-1.31362	-1.54676	-0.792505	0.387552	-0.0565639	2.14704	0.23085	-0.286164	1.02313
Hpx	1.47818	0.935449	1.73911	-0.810678	-0.949517	0.139639	0.0489205	-0.796429	0.146413	0.331332	-1.20193	-1.06048
Slc2a4	0.0550835	0.741614	-0.168995	-1.23267	-1.18805	-0.976488	-0.363647	0.44784	2.14999	-0.304423	-0.332928	1.17267
Pmfbp1	1.08607	0.292519	1.15909	-0.317947	-1.99883	-1.71707	-0.0658304	-0.365737	0.554483	0.699597	0.03289	0.640767
Myl7	0.116986	-0.195117	-0.276461	0.732686	0.114604	0.545526	-0.118528	-0.26857	1.10057	0.361531	-2.84032	0.727102
Pik3c2g	-1.14845	-1.46085	-1.80237	1.02153	0.489398	0.0807008	0.243147	-0.322033	1.19212	1.02875	0.0775781	0.600484
AABR07065814	-0.41832	-1.07811	-1.96505	0.666492	1.03452	1.19142	0.85361	-0.774087	0.972611	0.354142	-0.661103	-0.176135
C2cd4b	0.660977	1.09867	1.60128	0.448973	-1.00321	0.409017	-0.399077	0.0893301	-0.603736	-2.2015	0.0785227	-0.179252
Tnni3k	-1.1278	-1.1278	-1.1278	0.798029	0.93701	0.735995	-1.1278	-1.1278	0.999905	0.673228	0.665356	0.829485
LOC102554659	-1.24164	-1.85091	-1.26607	-0.123649	0.375681	0.318258	1.31752	1.18056	0.244829	0.985685	-0.0370487	0.0967725
AABR07014820	-0.00403113	-0.0224728	-0.12533	0.832104	1.68222	1.22874	0.128209	-1.43675	-1.67947	0.554574	-0.388376	-0.769413
Prss39	-1.03033	-0.885718	-2.33513	0.144981	0.448839	0.794862	0.701965	-0.37346	0.702758	0.741075	0.00779869	1.08235
Cldn1	-0.674789	-1.50553	-1.84189	0.0116245	-0.128486	1.11468	0.213006	0.233504	0.804282	0.3492	-0.221381	1.64578
Trpc4	0.297051	1.07426	0.767312	-1.92583	-0.651401	-1.85195	-0.0902723	0.862829	0.0411987	0.221551	0.713934	0.54131
Il22ra2	-1.33934	-0.83424	-1.3103	-0.17808	0.396265	0.856303	0.0931738	-0.539648	2.22892	0.646073	-0.314317	0.295194
Ric3	0.329606	-0.528281	-0.0186716	1.26105	1.77346	0.728212	-1.12618	-1.67721	0.664824	-0.169125	-0.737978	-0.499705
Gxylt2	0.777041	0.929094	0.565729	-2.04374	-1.01476	-1.03047	-0.892277	0.892282	0.946951	0.411253	-0.0713815	0.530277
Ecel1	0.79818	0.848457	0.790515	-1.34781	0.642094	-1.34781	0.566562	-1.34781	0.543465	-1.34781	0.620435	0.58153
AABR07040840	-1.62885	-0.710949	-2.03647	-0.1881	0.572795	0.545713	1.26791	-0.0573758	0.748113	0.300193	0.409496	0.777525
Abtb2	0.425167	0.929148	-0.136095	-1.76807	-1.90462	-0.611067	-0.0271916	1.13087	0.444354	0.889223	-0.101336	0.729614
Mtus2	0.0225003	0.184079	-0.771953	0.516608	0.820722	0.340497	0.244695	1.03434	1.28364	-2.13307	-0.139811	-1.40224
Oas1e	-1.3543	-1.16708	-0.639754	0.968072	1.43196	1.46219	0.191105	-1.33473	0.621853	-0.0440274	-0.230479	0.0951815
LOC103694905	1.58689	0.600214	1.7489	-0.654213	0.445341	-1.18271	-1.0754	-0.106237	-0.234624	-0.564725	-1.09941	0.535982
Ms4a7	0.762218	1.6323	-0.186667	-0.780243	-1.83694	-1.26047	-0.398485	0.678113	0.313275	0.572536	-0.446426	0.950789
Bmp8b	-0.633098	-0.306244	-0.0111208	0.97955	1.7212	1.35188	0.0353357	-0.446434	-1.77731	-1.15274	0.259008	-0.0200267
Areg	0.370725	1.25049	1.53789	0.177089	0.185543	-0.837978	-0.295862	-0.455177	-0.451751	-0.656624	1.15244	-1.97678
LOC100909671	0.576926	-1.60468	-1.06738	0.506119	1.90274	1.20712	0.0708171	-0.281235	0.569243	-0.773947	-0.533899	-0.571826
Sgsm1	-0.475824	0.212718	-1.49619	0.505321	1.1981	1.58681	-0.287843	-1.89231	0.734341	0.158039	-0.230044	-0.0131261
Fam180a	0.565315	0.748334	0.517335	-1.42783	-0.71452	-1.45093	0.419207	1.1409	-0.851037	-0.902836	1.34444	0.611618
Prss35	1.48745	0.550787	-0.78852	-2.0508	-0.711067	-0.681434	-0.275962	-0.403237	1.18177	0.709003	0.308774	0.673241
Serpinb5	-0.288675	-0.288675	-0.288675	-0.288675	-0.288675	-0.288675	-0.288675	-0.288675	3.17543	-0.288675	-0.288675	-0.288675
AABR07044397	-0.425917	-0.425917	-0.425917	-0.425917	-0.425917	1.88909	-0.425917	2.37008	-0.425917	-0.425917	-0.425917	-0.425917
Scn9a	-0.674453	-0.674453	-0.674453	1.29894	-0.674453	-0.674453	1.21895	1.28531	1.59242	-0.674453	-0.674453	-0.674453
Tmprss11a	-0.288675	-0.288675	-0.288675	-0.288675	-0.288675	-0.288675	-0.288675	-0.288675	3.17543	-0.288675	-0.288675	-0.288675
Vat1l	0.40231	0.561192	0.484691	0.450767	0.333631	0.404916	0.484417	0.457268	0.537185	-2.12814	0.139898	-2.12814
AABR07049503	0.664297	0.598349	0.605896	0.508905	0.537775	0.489178	0.519377	0.537145	0.50793	-1.65628	-1.65628	-1.65628
Scg2	-1.29735	-0.872105	-1.35041	0.126535	-0.0101136	0.556483	0.41145	-0.02849	2.45663	0.237997	-0.3588	0.128176
AABR07049292	-1.35226	-1.35226	-1.35226	0.758478	0.692096	0.632359	0.741223	0.629016	0.685821	-1.35226	0.703653	0.56641
Ffar3	1.65666	1.59694	1.71963	-0.552582	-0.552582	-0.552582	-0.552582	-0.552582	-0.552582	-0.552582	-0.552582	-0.552582
AABR07061068	0.947837	0.835584	-0.95375	0.998146	0.899153	1.18878	-0.95375	0.853002	-0.95375	-0.95375	-0.95375	-0.95375
AABR07071891	1.07016	1.14624	1.10428	-0.808886	-0.808886	-0.808886	-0.808886	-0.808886	-0.808886	1.16771	1.17382	-0.808886
RGD1305207	1.69807	1.46846	1.79563	-0.551351	-0.551351	-0.551351	-0.551351	-0.551351	-0.551351	-0.551351	-0.551351	-0.551351
Pou3f3	-0.424347	2.43462	-0.424347	-0.424347	-0.424347	-0.424347	-0.424347	-0.424347	-0.424347	-0.424347	-0.424347	1.80885
Nyx	-2.12772	-2.12772	0.0945596	0.461538	0.40933	0.463022	0.420499	0.45947	0.439417	0.547863	0.476594	0.483143
Shisa3	0.580863	0.721539	0.656168	-1.34975	-1.34975	-1.34975	-1.34975	0.545448	0.87203	0.703749	0.678508	0.640707
Aknad1	-1.65409	-1.65409	-1.65409	0.567107	0.593405	0.574852	0.485836	0.632214	0.612331	0.592159	0.545768	0.358591
LOC290595	0.477773	0.51592	-1.65113	0.538033	0.822106	0.593465	-1.65113	0.549424	0.497958	-1.65113	0.479888	0.478807
Fsd2	-0.95405	-0.95405	-0.95405	0.967737	-0.95405	1.01121	-0.95405	-0.95405	1.14442	0.924056	0.767247	0.909625
Nppa	-0.425784	-0.425784	-0.425784	1.88144	-0.425784	-0.425784	-0.425784	-0.425784	2.37639	-0.425784	-0.425784	-0.425784
Tex21	0.470692	0.620182	0.531904	-1.6503	-1.6503	-1.6503	0.537663	0.337615	0.745022	0.490694	0.628641	0.588492
