# Supplementary material for: Analysis of the Potential Relationship between Aging and Pulmonary Fibrosis Based on Transcriptome
Source: Life (Basel). 2022 Nov 23;12(12):1961. doi: 10.3390/life12121961 (PMC9788318; doi:10.3390/life12121961)
Supplement: Supplementary file 1 [file life-12-01961-s001.zip › Table S8-SA set GO enrichment Gene of Figur 4C.xlsx]

## Sheet: Sheet1
GO_ID	GO_Term	GO_function	GO_class	Genes	S gene number	TS gene number	B gene number	TB gene number	pvalue
GO:0005615	extracellular space	cellular_component	4	AABR07061068;S100a8;Ccl2;S100a9;Thbs1;Hpx;Selp;LOC299282;Col6a1;Fst;Il24;Pla2g2a;Tfpi2;Tac4;Areg;Scube2;Frzb;Bpifa1;Col15a1;Defb3;Cela3b;Serpinb10;Col1a1;Il6;Cpb2;Nyx;Nppa;Flrt2;Bmp8b;Ccl12;Inhba;Mmp2;Gsn;Serpine1;Ccl9;C9;AABR07044397;Arg1;Timp1;Prss39;LOC290595;Pgf;C4bpa;F3;Col7a1;Angpt2;Serpinb5;Slurp1;Col3a1;Adamts4;Scg2;Ereg;Lcn2;Ccl7;Wnt5a;Sele	56	256	1122	17887	0
GO:0005576	extracellular region	cellular_component	3	Bpifa1;S100a8;Angpt2;Defb3;Tnc;Timp1;Chia;Hpx;Nppa;Bmp8b;Frzb;Lcn2;Thbs2;LOC290595;Tac4;Ccl2;Pla2g2a;Pgf;Ccl7;Wnt5a;Ccl12;Thbs1;Flrt2;Serpine1;Il6;Gsn;Il22ra2;Inhba;Col1a1;Ccl9;Col3a1;Fst;Ereg;Tfpi2;Esm1;Cpb2;Prss39;Pdgfrl;Il24;Lif;Col6a1;PCOLCE2	42	256	895	17887	9.18865e-12
GO:0071356	cellular response to tumor necrosis factor	biological_process	8	Ppargc1a;Lcn2;Thbs1;Adamts12;Ccl2;Ccl9;Ccl7;Cldn1;Ccl12;Il6;Slc2a4;Ntrk2;Ankrd1;Col1a1;Has2	15	256	116	17887	1.09198e-10
GO:0031012	extracellular matrix	cellular_component	4	Col15a1;Col6a1;Timp1;Thbs1;Thbs2;Mmp2;Col1a1;Nid1;Nyx;Egflam;Nid2;Col7a1;Wnt5a;Tnc;Col3a1;Olfml2b	16	256	195	17887	2.19997e-08
GO:0005125	cytokine activity	molecular_function	7	Inhba;Lif;Wnt5a;Timp1;Il6;Bmp8b;Il24;Ccl12;LOC290595;Ccl7;Ccl2;Scg2;Areg	13	256	148	17887	2.14329e-07
GO:0048245	eosinophil chemotaxis	biological_process	7	Ccl7;Ccl12;Ccl9;Ccl2;Scg2	5	256	13	17887	6.76755e-07
GO:0071347	cellular response to interleukin-1	biological_process	8	Ccl12;Ccl7;Ankrd1;Il6;Adamts12;Ccl9;Ccl2;Lcn2;Has2	9	256	73	17887	9.56544e-07
GO:0062023	collagen-containing extracellular matrix	cellular_component	5	Col7a1;Tnc;Thbs1;Serpine1;Col3a1;Thbs2;LOC103690116;F3;Omd;Eln	10	256	99	17887	1.54203e-06
GO:0005604	basement membrane	cellular_component	6	LOC108348074;Egflam;Nid2;Nid1;Col15a1;Tnc;Thbs2;Timp1;Lamc3	9	256	79	17887	1.882e-06
GO:0008217	regulation of blood pressure	biological_process	5	Nppa;Tac4;Hmox1;Acta2;Gch1;Sod2;Atp1a2	7	256	44	17887	2.76351e-06
GO:0008284	positive regulation of cell population proliferation	biological_process	7	Ereg;Osmr;Aldh3a1;Il24;Lif;Ntrk2;Pou3f3;Avpr1a;Erbb4;Has2;Gli1;Pgf;Slc25a33;Tnc;Areg;Wnt5a;Esm1;Timp1;Thbs1	19	256	384	17887	2.95058e-06
GO:0042060	wound healing	biological_process	6	Tnc;Il24;Timp1;Gsn;Il6;Wnt5a;Col3a1;Col1a1;S100a8	9	256	85	17887	3.49434e-06
GO:0010460	positive regulation of heart rate	biological_process	10	Ryr2;Gch1;Nppa;Avpr1a;Scn3b	5	256	19	17887	5.69894e-06
GO:0048247	lymphocyte chemotaxis	biological_process	6	Ccl12;Ccl7;Ccl9;Ccl2;LOC290595	5	256	21	17887	9.74218e-06
GO:1900020	positive regulation of protein kinase C activity	biological_process	13	Wnt5a;Cemip;Ror2	3	256	4	17887	1.14684e-05
GO:0009612	response to mechanical stimulus	biological_process	5	Angpt2;Ccl2;Col3a1;Acta1;Col1a1;Thbs1;Tnc;Il6	8	256	75	17887	1.16368e-05
GO:0030593	neutrophil chemotaxis	biological_process	7	S100a8;Ccl2;Ccl9;Cxcr1;Ccl12;S100a9;Ccl7	7	256	55	17887	1.27993e-05
GO:0006954	inflammatory response	biological_process	6	Tac4;Ccl7;Scn9a;S100a8;Ccl12;Ccl9;Selp;Sele;Ccl2;Ntrk2;Tlr5;Thbs1;Ffar3	13	256	222	17887	1.96682e-05
GO:0030198	extracellular matrix organization	biological_process	6	Eln;Col3a1;Col15a1;Serpinb5;Col1a1;Egflam;Olfml2b;Col6a1;Nid1	9	256	108	17887	2.49501e-05
GO:0051918	negative regulation of fibrinolysis	biological_process	9	Cpb2;Thbs1;Serpine1	3	256	5	17887	2.83669e-05
GO:0051591	response to cAMP	biological_process	8	Cdo1;Col1a1;Areg;Pfkfb1;Aldh3a1;Ptprn	6	256	45	17887	4.13489e-05
GO:0045766	positive regulation of angiogenesis	biological_process	8	Serpine1;Thbs1;Hmox1;Pgf;F3;Ereg;Wnt5a;Itgb8;Angpt2	9	256	116	17887	4.4039e-05
GO:0005887	integral component of plasma membrane	cellular_component	6	Slc26a4;Gpnmb;Scara5;Adrb3;Slc2a4;Sstr1;Scn9a;Adcy1;Klri2;Flrt2;Kcna6;Clca1;Ntrk2;Sele;Selp;Syt13;Slco1a1;Ror2;Cftr;Cldn1;Avpr1a;Tlr5;LOC103694905;Pcdh7;Slc4a1;Has2	26	256	777	17887	5.35711e-05
GO:0004499	N,N-dimethylaniline monooxygenase activity	molecular_function	7	Fmo3;Fmo2;Fmo6	3	256	6	17887	5.61327e-05
GO:0010757	negative regulation of plasminogen activation	biological_process	11	Cpb2;Serpine1;Thbs1	3	256	6	17887	5.61327e-05
GO:0086010	membrane depolarization during action potential	biological_process	7	Scn9a;Scn3b;Scn7a	3	256	6	17887	5.61327e-05
GO:0005201	extracellular matrix structural constituent	molecular_function	4	Eln;Col15a1;NEWGENE_621351;Col3a1;Col1a1;Col6a1	6	256	48	17887	6.01031e-05
GO:0048020	CCR chemokine receptor binding	molecular_function	8	Ccl9;Ccl12;Ccl2;Ccl7	4	256	16	17887	6.51416e-05
GO:0071222	cellular response to lipopolysaccharide	biological_process	8	Ppargc1a;Serpine1;Ankrd1;Il24;Ccl2;Tlr5;Il6;Lcn2;Wnt5a;Arg1	10	256	153	17887	7.23324e-05
GO:0005200	structural constituent of cytoskeleton	molecular_function	4	Sptb;Add2;Tuba8;Krt76;Tubb6;Krt15	6	256	50	17887	7.59918e-05
GO:0035094	response to nicotine	biological_process	6	Dhfr;Atp1a2;Gnat3;Slc7a11;Hmox1;Ppp1r1b	6	256	50	17887	7.59918e-05
GO:0042493	response to drug	biological_process	5	Lcn2;Ppargc1a;Cox8b;Adcy1;Pgf;Sod2;Aldh3a1;Ccl2;Arg1;Inhba;Col1a1;Cpb2;Il6;Thbs1;Cyp2e1	15	256	337	17887	0.000109666
GO:0071346	cellular response to interferon-gamma	biological_process	8	Cldn1;Ccl2;Ccl9;Gsn;Ccl12;Ccl7;Wnt5a	7	256	78	17887	0.000126027
GO:0004252	serine-type endopeptidase activity	molecular_function	8	Cela3b;Prss39;Prss35;Gzmbl3;Prss22;C1s;F3;Gzmbl1;Tmprss11a;Gzma	10	256	166	17887	0.000142433
GO:0050891	multicellular organismal water homeostasis	biological_process	8	Nppa;Cftr;Bpifa1	3	256	8	17887	0.000153862
GO:0031090	organelle membrane	cellular_component	4	Cyp2e1;Flrt2;Nat8l;Fmo3;Fmo2;Fmo6	6	256	57	17887	0.000159631
GO:0008009	chemokine activity	molecular_function	8	Ccl9;LOC290595;Ccl7;Ccl12;Ccl2	5	256	37	17887	0.000173109
GO:0001938	positive regulation of endothelial cell proliferation	biological_process	9	Ccl2;F3;Pgf;Wnt5a;Scg2;Arg1	6	256	58	17887	0.00017594
GO:0002020	protease binding	molecular_function	6	F3;Col3a1;Adamts4;Lcn2;Timp1;Serpine1;Col1a1	7	256	83	17887	0.00018642
GO:0070374	positive regulation of ERK1 and ERK2 cascade	biological_process	12	Gpnmb;Il6;Pla2g2a;Ccl2;Marco;Ccl7;Ccl9;Ccl12;Erbb4;Trem2	10	256	172	17887	0.000190398
GO:0002548	monocyte chemotaxis	biological_process	6	Ccl2;Ccl12;Ccl7;Ccl9	4	256	21	17887	0.000202481
GO:0031727	CCR2 chemokine receptor binding	molecular_function	9	Ccl2;Ccl7	2	256	2	17887	0.000204047
GO:0070488	neutrophil aggregation	biological_process	8	S100a8;S100a9	2	256	2	17887	0.000204047
GO:0002544	chronic inflammatory response	biological_process	7	S100a8;Thbs1;Ccl2	3	256	9	17887	0.000228352
GO:0006935	chemotaxis	biological_process	5	Ccl2;S100a8;Cxcr1;Defb3;Ccl7;LOC290595;Ccl12	7	256	86	17887	0.000232652
GO:0007568	aging	biological_process	4	Sod2;Ppargc1a;Ntrk2;Cldn1;Ccl2;Arg1;Adrb3;Il6;Timp1;Gsn;Aldh3a1	11	256	211	17887	0.000238559
GO:0071560	cellular response to transforming growth factor beta stimulus	biological_process	8	Wnt5a;Ppargc1a;Arg1;Col1a1;Cldn1;Ankrd1	6	256	62	17887	0.000254785
GO:0007155	cell adhesion	biological_process	4	Selp;Gpnmb;Itgb8;Cldn11;Itga11;Col15a1;Flrt2;LOC108348074;Tnc;Sele;Tnfrsf12a;Thbs2;Thbs1;Pcdh7	14	256	327	17887	0.000276142
GO:0031669	cellular response to nutrient levels	biological_process	7	Lcn2;Fam107a;Il6	3	256	10	17887	0.00032277
GO:0048407	platelet-derived growth factor binding	molecular_function	6	Col1a1;Col3a1;Col6a1	3	256	10	17887	0.00032277
GO:0071398	cellular response to fatty acid	biological_process	7	Ffar3;Ppargc1a;Ccl2;Olr59	4	256	24	17887	0.000347565
GO:0001666	response to hypoxia	biological_process	5	Ryr2;Ccl2;Mmp2;Ppargc1a;Angpt2;Sod2;Pgf;Nppa;Hmox1;Aldh3a1	10	256	186	17887	0.000357109
GO:0002376	immune system process	biological_process	3	Klrg1;Lcn2;Tlr5;Ffar3;Arg1;S100a8;Bpifa1;AABR07044397;Lax1	9	256	154	17887	0.000382069
GO:0008285	negative regulation of cell population proliferation	biological_process	7	Ereg;Inhba;Zbtb16;Wnk2;St18;Il24;Lif;Slurp1;Erbb4;Hmox1;Ror2;Il6;Frzb	13	256	299	17887	0.000392511
GO:0055072	iron ion homeostasis	biological_process	11	Sod2;Hmox1;Scara5;Lcn2	4	256	25	17887	0.000409144
GO:0002523	leukocyte migration involved in inflammatory response	biological_process	5	S100a8;Ccl2;S100a9	3	256	11	17887	0.000439123
GO:0008083	growth factor activity	molecular_function	7	Il6;Bmp8b;Ereg;Timp1;Areg;Pgf;Inhba;Lif	8	256	125	17887	0.000439355
GO:0007160	cell-matrix adhesion	biological_process	6	Nid2;Itgb8;Nid1;Adamts12;Col3a1;Itga11	6	256	69	17887	0.00045714
GO:0060135	maternal process involved in female pregnancy	biological_process	5	Arg1;Angpt2;Lif;Ccl2	4	256	26	17887	0.000478134
GO:0010628	positive regulation of gene expression	biological_process	8	Inhba;Lif;Tmem119;Ccl2;Ppargc1a;Ntrk2;Adtrp;Gsn;Wnt5a;Il6;Tnc;Acta1;Itgb8;Lcn2	14	256	346	17887	0.000486634
GO:0009617	response to bacterium	biological_process	7	Scn7a;Cyp2e1;Fkbp5;Lcn2;Mnda;Il6;Ccl2	7	256	99	17887	0.000550871
GO:0050840	extracellular matrix binding	molecular_function	4	Nid1;Eln;Thbs1;Olfml2b	4	256	27	17887	0.000555021
GO:0005509	calcium ion binding	molecular_function	7	Egflam;Crtac1;Thbs1;Nid1;Myl7;Ryr2;Pcdh7;Pla2g2a;S100a8;Scube2;Gch1;Doc2b;Gsn;Ltbp2;C1s;Thbs2;Nid2;Selp;S100a9;Tchh	20	256	615	17887	0.000571806
GO:0015106	bicarbonate transmembrane transporter activity	molecular_function	8	Slc26a4;Slc4a1;Cftr	3	256	12	17887	0.000579319
GO:0035662	Toll-like receptor 4 binding	molecular_function	7	S100a8;S100a9	2	256	3	17887	0.000606344
GO:0097325	melanocyte proliferation	biological_process	5	Wnt5a;Olr59	2	256	3	17887	0.000606344
GO:0007223	Wnt signaling pathway, calcium modulating pathway	biological_process	9	Ror2;Wnt5a	2	256	3	17887	0.000606344
GO:0005272	sodium channel activity	molecular_function	8	Scn9a;Scn3b;Trpm5;Scn7a	4	256	28	17887	0.000640299
GO:0097421	liver regeneration	biological_process	8	LOC100362027;Cpb2;Gli1;Cldn1;Hmox1	5	256	49	17887	0.000658645
GO:0045471	response to ethanol	biological_process	6	Ccl2;Tnc;Gsn;S100a8;Cdo1;Cldn1;Cyp2e1;Slc2a4	8	256	135	17887	0.000732268
GO:0014898	cardiac muscle hypertrophy in response to stress	biological_process	6	Klf15;Nppa;Myh7	3	256	13	17887	0.000745172
GO:0006811	ion transport	biological_process	6	Trpc4;Kcna6;Scn3b;Kcnj4;Slco1a1;Slc4a1;Scn9a;Scara5;Gabrp;Ryr2;Trpm5;Lcn2;Scn7a;Cftr;Add2;Atp1a2	16	256	452	17887	0.000840365
GO:0071230	cellular response to amino acid stimulus	biological_process	7	Col1a1;Mmp2;Col3a1;Ntrk2;Col6a1	5	256	52	17887	0.000866986
GO:0002687	positive regulation of leukocyte migration	biological_process	7	Ccl12;Ccl2;Selp	3	256	14	17887	0.000938407
GO:0001518	voltage-gated sodium channel complex	cellular_component	9	Scn9a;Scn3b;Scn7a	3	256	14	17887	0.000938407
GO:0070098	chemokine-mediated signaling pathway	biological_process	7	Ccl7;Cxcr1;Ccl9;Ccl12;Ccl2	5	256	54	17887	0.00103081
GO:0000302	response to reactive oxygen species	biological_process	6	Ptprn;Sod2;Ppargc1a	3	256	15	17887	0.00116066
GO:0050901	leukocyte tethering or rolling	biological_process	8	Add2;Selp;Sele	3	256	15	17887	0.00116066
GO:0007621	negative regulation of female receptivity	biological_process	8	Ppp1r1b;Avpr1a	2	256	4	17887	0.00120122
GO:0019829	ATPase-coupled cation transmembrane transporter activity	molecular_function	8	Atp7b;Atp1a2	2	256	4	17887	0.00120122
GO:0046654	tetrahydrofolate biosynthetic process	biological_process	8	Dhfr;Gch1	2	256	4	17887	0.00120122
GO:0072108	positive regulation of mesenchymal to epithelial transition involved in metanephros morphogenesis	biological_process	10	Pax8;Lif	2	256	4	17887	0.00120122
GO:0042168	heme metabolic process	biological_process	8	Hmox1;Hpx	2	256	4	17887	0.00120122
GO:0060750	epithelial cell proliferation involved in mammary gland duct elongation	biological_process	6	Areg;Wnt5a	2	256	4	17887	0.00120122
GO:2000121	regulation of removal of superoxide radicals	biological_process	9	Gch1;Dhfr	2	256	4	17887	0.00120122
GO:0015108	chloride transmembrane transporter activity	molecular_function	8	Cftr;Slc4a1;Slc26a4	3	256	16	17887	0.00141347
GO:0048661	positive regulation of smooth muscle cell proliferation	biological_process	8	Ppargc1a;Mmp2;Thbs1;Hmox1;Ereg	5	256	58	17887	0.00142592
GO:0043679	axon terminus	cellular_component	6	Ccl2;Ptprn;Kcna6;Ntrk2;LOC103694905	5	256	58	17887	0.00142592
GO:0006955	immune response	biological_process	4	Ccl7;C9;Ccl9;Thbs1;Lif;Oas1e;AABR07044397;Ccl2;Lax1;Il6;Cxcr1;AABR07061068;Ccl12	13	256	344	17887	0.00142891
GO:0005901	caveola	cellular_component	8	Trpc4;Adtrp;Hmox1;Sele;Atp1a2	5	256	59	17887	0.00154003
GO:0009611	response to wounding	biological_process	5	Ccl2;Il6;Gli1;Arg1;Tnc	5	256	60	17887	0.00166072
GO:0051602	response to electrical stimulus	biological_process	5	LOC103694905;Sod2;Ppargc1a;Il6	4	256	36	17887	0.00168425
GO:0043200	response to amino acid	biological_process	6	Il6;Ccl2;Arg1;Cdo1	4	256	37	17887	0.00186742
GO:0050661	NADP binding	molecular_function	6	Fmo6;Fmo3;Fmo2;Dhfr	4	256	37	17887	0.00186742
GO:0033691	sialic acid binding	molecular_function	7	Sele;Selp	2	256	5	17887	0.00198312
GO:0060744	mammary gland branching involved in thelarche	biological_process	5	Areg;Wnt5a	2	256	5	17887	0.00198312
GO:2001269	positive regulation of cysteine-type endopeptidase activity involved in apoptotic signaling pathway	biological_process	11	Gsn;St18	2	256	5	17887	0.00198312
GO:0060029	convergent extension involved in organogenesis	biological_process	8	Wnt5a;Frzb	2	256	5	17887	0.00198312
GO:0008430	selenium binding	molecular_function	4	LOC103689947;Selenbp1	2	256	5	17887	0.00198312
GO:0030141	secretory granule	cellular_component	8	Scg2;Clca1;Ptprn;Thbs1;Col1a1;Pla2g2a	6	256	93	17887	0.00218723
GO:0034097	response to cytokine	biological_process	6	Sele;Il6;Timp1;Col3a1;Osmr	5	256	64	17887	0.00221372
GO:0043434	response to peptide hormone	biological_process	6	Arg1;Col1a1;Timp1;Areg;Ereg	5	256	64	17887	0.00221372
GO:0009409	response to cold	biological_process	5	Sod2;Il6;Ppargc1a;Adrb3	4	256	39	17887	0.00227429
GO:0060048	cardiac muscle contraction	biological_process	8	Scn3b;Myh7;Atp1a2;Ryr2	4	256	39	17887	0.00227429
GO:0015701	bicarbonate transport	biological_process	9	Cftr;Slc4a1;Slc26a4	3	256	19	17887	0.0023695
GO:0050900	leukocyte migration	biological_process	4	Selp;Sele;Add2	3	256	19	17887	0.0023695
GO:0030863	cortical cytoskeleton	cellular_component	7	Sele;Slc4a1;Trpc4	3	256	19	17887	0.0023695
GO:0072307	regulation of metanephric nephron tubule epithelial cell differentiation	biological_process	10	Lif;Pax8	2	256	6	17887	0.00294662
GO:0050544	arachidonic acid binding	molecular_function	8	S100a9;S100a8	2	256	6	17887	0.00294662
GO:0001957	intramembranous ossification	biological_process	6	Mmp2;Col1a1	2	256	6	17887	0.00294662
GO:0008236	serine-type peptidase activity	molecular_function	6	Gzmbl3;Prss39;Cela3b;Prss22;Gzmbl1;Gzma;Tmprss11a	7	256	134	17887	0.0031882
GO:0071392	cellular response to estradiol stimulus	biological_process	7	Sstr1;Ccl2;Il6;Ppargc1a	4	256	43	17887	0.00326352
GO:0009986	cell surface	cellular_component	4	Areg;Ntrk2;Scara5;Slc7a11;Thbs1;Itgb8;Cftr;Scube2;Slc2a4;Tnfrsf12a;Adtrp;Wnt5a;Ror2;F3;Trpc4	15	256	475	17887	0.00362364
GO:0001819	positive regulation of cytokine production	biological_process	7	Ereg;Tlr5;Wnt5a	3	256	22	17887	0.00364854
GO:0051968	positive regulation of synaptic transmission, glutamatergic	biological_process	9	Ntrk2;Ror2;Ccl2	3	256	22	17887	0.00364854
GO:0042531	positive regulation of tyrosine phosphorylation of STAT protein	biological_process	11	Hpx;Erbb4;Lif;Il24	4	256	45	17887	0.00385334
GO:0001878	response to yeast	biological_process	8	Chia;Il6	2	256	7	17887	0.00408639
GO:0045545	syndecan binding	molecular_function	6	Gpnmb;Tnc	2	256	7	17887	0.00408639
GO:0051775	response to redox state	biological_process	4	Slc7a11;Ryr2	2	256	7	17887	0.00408639
GO:0050786	RAGE receptor binding	molecular_function	6	S100a8;S100a9	2	256	7	17887	0.00408639
GO:0031402	sodium ion binding	molecular_function	8	Scn9a;Atp1a2	2	256	7	17887	0.00408639
GO:0002027	regulation of heart rate	biological_process	9	Tnni3k;Myh7;Ryr2	3	256	23	17887	0.00415189
GO:0032868	response to insulin	biological_process	7	Klf15;Nppa;Pfkfb1;Ptprn;Il6	5	256	76	17887	0.00467136
GO:0051384	response to glucocorticoid	biological_process	8	Cdo1;Pfkfb1;Areg;Ccl2;Aldh3a1	5	256	76	17887	0.00467136
GO:0042327	positive regulation of phosphorylation	biological_process	10	Ereg;Areg;Thbs1	3	256	24	17887	0.00469536
GO:0035987	endodermal cell differentiation	biological_process	6	Col6a1;Mmp2;Inhba	3	256	24	17887	0.00469536
GO:0016491	oxidoreductase activity	molecular_function	4	Fmo2;Hmox1;Sod2;Vat1l;Adhfe1;LOC100365958;Aldh3a1;Cdo1;Fmo6;Cyp2e1;Dhfr;Akr1c19;Fmo3;Aox3;Aldh1l2	15	256	493	17887	0.00508907
GO:0002040	sprouting angiogenesis	biological_process	6	Thbs1;Pgf;Esm1	3	256	25	17887	0.00527985
GO:0042056	chemoattractant activity	molecular_function	7	Scg2;Defb3;Pgf	3	256	25	17887	0.00527985
GO:0045103	intermediate filament-based process	biological_process	4	Krt15;Krt76	2	256	8	17887	0.00539723
GO:0010042	response to manganese ion	biological_process	7	Arg1;Sod2	2	256	8	17887	0.00539723
GO:0033162	melanosome membrane	cellular_component	7	Mreg;Gpnmb	2	256	8	17887	0.00539723
GO:2001223	negative regulation of neuron migration	biological_process	9	Erbb4;Col3a1	2	256	8	17887	0.00539723
GO:0010882	regulation of cardiac muscle contraction by calcium ion signaling	biological_process	8	Atp1a2;Ryr2	2	256	8	17887	0.00539723
GO:0071313	cellular response to caffeine	biological_process	7	Ryr2;Ppargc1a	2	256	8	17887	0.00539723
GO:0009635	response to herbicide	biological_process	5	Lcn2;Arg1	2	256	8	17887	0.00539723
GO:0097435	supramolecular fiber organization	biological_process	5	Col3a1;Ltbp2	2	256	8	17887	0.00539723
GO:0060346	bone trabecula formation	biological_process	6	Col1a1;Mmp2	2	256	8	17887	0.00539723
GO:0004029	aldehyde dehydrogenase (NAD) activity	molecular_function	7	Aldh3a1;Aldh1l2	2	256	8	17887	0.00539723
GO:0032964	collagen biosynthetic process	biological_process	5	Col1a1;Arg1	2	256	8	17887	0.00539723
GO:0006729	tetrahydrobiopterin biosynthetic process	biological_process	8	Gch1;Dhfr	2	256	8	17887	0.00539723
GO:0070492	oligosaccharide binding	molecular_function	5	Sele;Selp	2	256	8	17887	0.00539723
GO:0008201	heparin binding	molecular_function	6	Gpnmb;PCOLCE2;Ccl2;Ccl7;Selp;Thbs1	6	256	112	17887	0.00548806
GO:0031667	response to nutrient levels	biological_process	6	Ppargc1a;Il6;Col1a1;Lcn2;Sod2	5	256	79	17887	0.00550551
GO:0006508	proteolysis	biological_process	7	Cpb2;Mmp2;Adamts12;Cpvl;Gzmbl3;Gzmbl1;Cpz;C1s;Gzma;Ecel1;Tmprss11a;Adamts4;Prss35;Prss39;Cela3b;Prss22	16	256	547	17887	0.00561308
GO:0050729	positive regulation of inflammatory response	biological_process	9	Wnt5a;S100a9;Serpine1;S100a8	4	256	50	17887	0.00563412
GO:0043408	regulation of MAPK cascade	biological_process	10	Inhba;Bmp8b;Ror2;Ntrk2	4	256	50	17887	0.00563412
GO:0005886	plasma membrane	cellular_component	4	Aldh3a1;Rundc3a;Cxcr1;Nid2;Doc2b;Ffar3;Ereg;Cldn1;Gabrp;Rnd1;Slc2a4;Scn9a;AABR07044397;Il22ra2;Ptprn;Klri2;Slc4a1;S100a8;Sstr1;LOC103694905;Adtrp;Atp1a2;Gpnmb;Slco1a1;Mmp2;Klrg1;Adrb3;Adcy1;Cemip;Tmem119;Flrt2;Bcl3;Scn3b;Trpc4;Add2;Lax1;C9;Marco;Fam107a;Hmox1;Gsn;Ntrk2;Scara5;Sele;Gem;Trem2;Cftr;Zbtb16;Klrd1;Cldn11;Olr59;Pla2g2a;Tnfrsf12a;Angpt2;LOC498222;Pcdh7;Slc26a4;Slc7a11;Scn7a;Avpr1a	60	256	3074	17887	0.00618979
GO:0010976	positive regulation of neuron projection development	biological_process	11	Ankrd1;Ror2;LOC103694905;Il6;Wnt5a;Ntrk2	6	256	115	17887	0.00623108
GO:0030335	positive regulation of cell migration	biological_process	8	Has2;Ror2;Gpnmb;Cemip;Fam107a;Thbs1;Col1a1;Cldn1	8	256	192	17887	0.00653805
GO:0005102	signaling receptor binding	molecular_function	5	Wnt5a;Serpine1;Nppa;Lif;Ppargc1a;Il6;Rnd1;Inhba;AABR07044397;Itgb8	10	256	276	17887	0.00659147
GO:0001525	angiogenesis	biological_process	5	Scg2;Pgf;Serpine1;Esm1;Hmox1;Angpt2;Ereg	7	256	154	17887	0.00678781
GO:0010753	positive regulation of cGMP-mediated signaling	biological_process	10	Nppa;Rundc3a	2	256	9	17887	0.00687405
GO:0010226	response to lithium ion	biological_process	7	Adcy1;Acta1	2	256	9	17887	0.00687405
GO:0019869	chloride channel inhibitor activity	molecular_function	7	Cftr;Wnk2	2	256	9	17887	0.00687405
GO:0045740	positive regulation of DNA replication	biological_process	10	Il6;Gli1;Ereg	3	256	28	17887	0.00728722
GO:0004180	carboxypeptidase activity	molecular_function	8	Cpz;Cpb2;Cpvl	3	256	28	17887	0.00728722
GO:0034612	response to tumor necrosis factor	biological_process	7	Aff3;Gch1;Ccl2	3	256	28	17887	0.00728722
GO:0070207	protein homotrimerization	biological_process	9	Arg1;Lcn2;Scara5	3	256	28	17887	0.00728722
GO:0042742	defense response to bacterium	biological_process	8	AABR07065814;Defb3;Tlr5;Bpifa1;LOC290595;Lcn2	6	256	119	17887	0.00733233
GO:0005518	collagen binding	molecular_function	5	PCOLCE2;Nid1;Col6a1;Itga11	4	256	54	17887	0.00740117
GO:0001934	positive regulation of protein phosphorylation	biological_process	10	Adtrp;Card14;Marco;Gpnmb;Wnt5a;Pgf;Tmem119	7	256	158	17887	0.00777169
GO:0005581	collagen trimer	cellular_component	4	Col15a1;LOC108348074;Col1a1;Col3a1	4	256	55	17887	0.00789375
GO:0050873	brown fat cell differentiation	biological_process	7	Slc2a4;Adrb3;Ppargc1a	3	256	29	17887	0.00804331
GO:0005154	epidermal growth factor receptor binding	molecular_function	7	Erbb4;Areg;Ereg	3	256	29	17887	0.00804331
GO:0033209	tumor necrosis factor-mediated signaling pathway	biological_process	7	Card14;St18;Krt8	3	256	29	17887	0.00804331
GO:0008233	peptidase activity	molecular_function	5	Gzmbl1;Cela3b;Prss39;Mmp2;Prss22;Adamts12;C1s;Cpb2;Cpvl;Gzma;Gzmbl3;Tmprss11a	12	256	377	17887	0.00834745
GO:0042542	response to hydrogen peroxide	biological_process	7	Sod2;Col1a1;Hmox1;Areg	4	256	56	17887	0.00840738
GO:0071383	cellular response to steroid hormone stimulus	biological_process	7	Adtrp;Atp1a2	2	256	10	17887	0.00851187
GO:0097284	hepatocyte apoptotic process	biological_process	8	Gsn;Krt8	2	256	10	17887	0.00851187
GO:0046888	negative regulation of hormone secretion	biological_process	8	Il6;Lif	2	256	10	17887	0.00851187
GO:0045087	innate immune response	biological_process	5	Arg1;Tlr5;S100a9;S100a8;Lcn2;Klrg1;Bpifa1;AABR07065814	8	256	202	17887	0.00876305
GO:0010332	response to gamma radiation	biological_process	7	Ccl2;Ccl7;Sod2	3	256	30	17887	0.0088439
GO:0071276	cellular response to cadmium ion	biological_process	8	Gsn;Hmox1;Mt2A	3	256	30	17887	0.0088439
GO:0042472	inner ear morphogenesis	biological_process	6	Ror2;Wnt5a;Frzb;Pax8	4	256	57	17887	0.00894241
GO:0031100	animal organ regeneration	biological_process	6	Ccl2;Angpt2;Pfkfb1;Pgf	4	256	57	17887	0.00894241
GO:0007596	blood coagulation	biological_process	7	F3;Cpb2;Tfpi2;Slc4a1	4	256	57	17887	0.00894241
GO:0035725	sodium ion transmembrane transport	biological_process	10	Scn3b;Scn9a;Scn7a;Trpm5	4	256	58	17887	0.00949919
GO:0097191	extrinsic apoptotic signaling pathway	biological_process	6	Inhba;Tnfrsf12a;Krt8	3	256	31	17887	0.00968952
GO:0016323	basolateral plasma membrane	cellular_component	5	Cldn1;Slco1a1;Slc4a1;Erbb4;Trpc4;Kcnj4;Atp7b	7	256	166	17887	0.01005
GO:0031091	platelet alpha granule	cellular_component	9	Thbs2;Thbs1	2	256	11	17887	0.0103058
GO:0070102	interleukin-6-mediated signaling pathway	biological_process	7	St18;Il6	2	256	11	17887	0.0103058
GO:0045779	negative regulation of bone resorption	biological_process	9	Il6;Tmem119	2	256	11	17887	0.0103058
GO:0045651	positive regulation of macrophage differentiation	biological_process	10	Ror2;Lif	2	256	11	17887	0.0103058
GO:0043032	positive regulation of macrophage activation	biological_process	8	Thbs1;Wnt5a	2	256	11	17887	0.0103058
GO:0010269	response to selenium ion	biological_process	6	Arg1;Sod2	2	256	11	17887	0.0103058
GO:0002024	diet induced thermogenesis	biological_process	5	Bmp8b;Adrb3	2	256	11	17887	0.0103058
GO:0071300	cellular response to retinoic acid	biological_process	7	Col1a1;Brinp2;Tnc;Ccl2	4	256	60	17887	0.0106793
GO:0005198	structural molecule activity	molecular_function	3	Cldn11;Krt15;Cldn1;Col15a1;LOC108348074	5	256	94	17887	0.0112925
GO:0014823	response to activity	biological_process	4	Ccl2;Sod2;Angpt2;Ppargc1a	4	256	61	17887	0.0113032
GO:0046677	response to antibiotic	biological_process	5	Ccl2;Il6;Adrb3	3	256	33	17887	0.0115177
GO:0050918	positive chemotaxis	biological_process	6	Scg2;Pgf;Defb3	3	256	33	17887	0.0115177
GO:0042594	response to starvation	biological_process	5	Pfkfb1;Ppargc1a;Sstr1	3	256	33	17887	0.0115177
GO:0032496	response to lipopolysaccharide	biological_process	7	Gch1;Arg1;Cldn1;Sod2;Il6;S100a8;Ccl2	7	256	172	17887	0.0120533
GO:0051016	barbed-end actin filament capping	biological_process	11	Gsn;Add2	2	256	12	17887	0.0122511
GO:0071498	cellular response to fluid shear stress	biological_process	6	Tfpi2;Has2	2	256	12	17887	0.0122511
GO:0060071	Wnt signaling pathway, planar cell polarity pathway	biological_process	9	Wnt5a;Ror2	2	256	12	17887	0.0122511
GO:0030194	positive regulation of blood coagulation	biological_process	8	Serpine1;Thbs1	2	256	12	17887	0.0122511
GO:0050930	induction of positive chemotaxis	biological_process	10	Scg2;Pgf	2	256	12	17887	0.0122511
GO:0030324	lung development	biological_process	6	Gli1;Nkx2-8;Wnt5a;Lif;Arg1	5	256	96	17887	0.012291
GO:0042130	negative regulation of T cell proliferation	biological_process	11	Gpnmb;Pla2g2a;Arg1	3	256	34	17887	0.0125011
GO:0048286	lung alveolus development	biological_process	5	Slc7a11;Lif;Slfn4	3	256	34	17887	0.0125011
GO:0001664	G protein-coupled receptor binding	molecular_function	6	Marco;LOC290595;Gnat3;Ccl2	4	256	63	17887	0.0126204
GO:0050660	flavin adenine dinucleotide binding	molecular_function	6	Fmo3;Aox3;Fmo2;Fmo6	4	256	63	17887	0.0126204
GO:0014068	positive regulation of phosphatidylinositol 3-kinase signaling	biological_process	10	Ntrk2;Erbb4;Selp;Ror2	4	256	64	17887	0.0133141
GO:0048545	response to steroid hormone	biological_process	6	Acta1;Arg1;Col1a1	3	256	35	17887	0.0135312
GO:0010043	response to zinc ion	biological_process	7	Arg1;S100a8;Sod2	3	256	35	17887	0.0135312
GO:0045429	positive regulation of nitric oxide biosynthetic process	biological_process	9	Sod2;Tlr5;Il6	3	256	35	17887	0.0135312
GO:0005216	ion channel activity	molecular_function	6	Trpm5;Scn9a;Scn7a;Kcna6;Ryr2;Gabrp;Trpc4	7	256	176	17887	0.0135398
GO:0005791	rough endoplasmic reticulum	cellular_component	7	LOC103694905;Slc7a11;Ntrk2;Ccl2	4	256	65	17887	0.0140317
GO:0032996	Bcl3-Bcl10 complex	cellular_component	4	Bcl3	1	256	1	17887	0.0143121
GO:0046439	L-cysteine metabolic process	biological_process	11	Cdo1	1	256	1	17887	0.0143121
GO:0071855	neuropeptide receptor binding	molecular_function	7	Nppa	1	256	1	17887	0.0143121
GO:0015052	beta3-adrenergic receptor activity	molecular_function	10	Adrb3	1	256	1	17887	0.0143121
GO:0035821	modification of morphology or physiology of other organism	biological_process	5	S100a9	1	256	1	17887	0.0143121
GO:0031294	lymphocyte costimulation	biological_process	4	Il6	1	256	1	17887	0.0143121
GO:2000184	positive regulation of progesterone biosynthetic process	biological_process	11	Ppargc1a	1	256	1	17887	0.0143121
GO:0033029	regulation of neutrophil apoptotic process	biological_process	6	Slc7a11	1	256	1	17887	0.0143121
GO:0004939	beta-adrenergic receptor activity	molecular_function	9	Adrb3	1	256	1	17887	0.0143121
GO:1904635	positive regulation of glomerular visceral epithelial cell apoptotic process	biological_process	11	Ppargc1a	1	256	1	17887	0.0143121
GO:0050683	AF-1 domain binding	molecular_function	6	Heyl	1	256	1	17887	0.0143121
GO:1903815	negative regulation of collecting lymphatic vessel constriction	biological_process	7	Nppa	1	256	1	17887	0.0143121
GO:0002246	wound healing involved in inflammatory response	biological_process	7	Hmox1	1	256	1	17887	0.0143121
GO:0017188	aspartate N-acetyltransferase activity	molecular_function	9	Nat8l	1	256	1	17887	0.0143121
GO:1903082	positive regulation of C-C chemokine receptor CCR7 signaling pathway	biological_process	11	Trem2	1	256	1	17887	0.0143121
GO:0009098	leucine biosynthetic process	biological_process	11	Bcat1	1	256	1	17887	0.0143121
GO:0043540	6-phosphofructo-2-kinase/fructose-2,6-biphosphatase complex	cellular_component	7	Pfkfb1	1	256	1	17887	0.0143121
GO:0072236	metanephric loop of Henle development	biological_process	9	Pou3f3	1	256	1	17887	0.0143121
GO:0006539	glutamate catabolic process via 2-oxoglutarate	biological_process	10	Adhfe1	1	256	1	17887	0.0143121
GO:1904639	cellular response to resveratrol	biological_process	8	Ppargc1a	1	256	1	17887	0.0143121
GO:0106138	Sec61 translocon complex binding	molecular_function	5	Cftr	1	256	1	17887	0.0143121
GO:0004146	dihydrofolate reductase activity	molecular_function	7	Dhfr	1	256	1	17887	0.0143121
GO:0052356	catabolism by host of symbiont cell wall chitin	biological_process	11	Chia	1	256	1	17887	0.0143121
GO:1901331	positive regulation of odontoblast differentiation	biological_process	9	Serpine1	1	256	1	17887	0.0143121
GO:0047988	hydroxyacid-oxoacid transhydrogenase activity	molecular_function	6	Adhfe1	1	256	1	17887	0.0143121
GO:0072599	establishment of protein localization to endoplasmic reticulum	biological_process	9	Ryr2	1	256	1	17887	0.0143121
GO:0031930	mitochondria-nucleus signaling pathway	biological_process	5	Slc25a33	1	256	1	17887	0.0143121
GO:0035998	7,8-dihydroneopterin 3'-triphosphate biosynthetic process	biological_process	7	Gch1	1	256	1	17887	0.0143121
GO:1901076	positive regulation of engulfment of apoptotic cell	biological_process	10	Trem2	1	256	1	17887	0.0143121
GO:0051871	dihydrofolic acid binding	molecular_function	7	Dhfr	1	256	1	17887	0.0143121
GO:0060598	dichotomous subdivision of terminal units involved in mammary gland duct morphogenesis	biological_process	8	Areg	1	256	1	17887	0.0143121
GO:1901860	positive regulation of mitochondrial DNA metabolic process	biological_process	10	Ppargc1a	1	256	1	17887	0.0143121
GO:0120035	regulation of plasma membrane bounded cell projection organization	biological_process	8	Trem2	1	256	1	17887	0.0143121
GO:0072227	metanephric macula densa development	biological_process	10	Pou3f3	1	256	1	17887	0.0143121
GO:0007418	ventral midline development	biological_process	5	Gli1	1	256	1	17887	0.0143121
GO:0015680	protein maturation by copper ion transfer	biological_process	8	Atp7b	1	256	1	17887	0.0143121
GO:0043509	activin A complex	cellular_component	5	Inhba	1	256	1	17887	0.0143121
GO:0005115	receptor tyrosine kinase-like orphan receptor binding	molecular_function	6	Wnt5a	1	256	1	17887	0.0143121
GO:0050828	regulation of liquid surface tension	biological_process	6	Bpifa1	1	256	1	17887	0.0143121
GO:1901863	positive regulation of muscle tissue development	biological_process	7	Ppargc1a	1	256	1	17887	0.0143121
GO:1903923	positive regulation of protein processing in phagocytic vesicle	biological_process	11	Gsn	1	256	1	17887	0.0143121
GO:0090500	endocardial cushion to mesenchymal transition	biological_process	9	Has2	1	256	1	17887	0.0143121
GO:0030167	proteoglycan catabolic process	biological_process	9	Adamts12	1	256	1	17887	0.0143121
GO:0034146	toll-like receptor 5 signaling pathway	biological_process	9	Tlr5	1	256	1	17887	0.0143121
GO:0060175	brain-derived neurotrophic factor-activated receptor activity	molecular_function	10	Ntrk2	1	256	1	17887	0.0143121
GO:0036517	chemoattraction of serotonergic neuron axon	biological_process	8	Wnt5a	1	256	1	17887	0.0143121
GO:0072240	metanephric DCT cell differentiation	biological_process	8	Pou3f3	1	256	1	17887	0.0143121
GO:0048773	erythrophore differentiation	biological_process	7	Sod2	1	256	1	17887	0.0143121
GO:0045380	positive regulation of interleukin-17 biosynthetic process	biological_process	9	Il6	1	256	1	17887	0.0143121
GO:0005260	intracellularly ATP-gated chloride channel activity	molecular_function	9	Cftr	1	256	1	17887	0.0143121
GO:1903170	negative regulation of calcium ion transmembrane transport	biological_process	10	Atp1a2	1	256	1	17887	0.0143121
GO:0032078	negative regulation of endodeoxyribonuclease activity	biological_process	11	Gzma	1	256	1	17887	0.0143121
GO:0034395	regulation of transcription from RNA polymerase II promoter in response to iron	biological_process	10	Hmox1	1	256	1	17887	0.0143121
GO:0045852	pH elevation	biological_process	11	Slc4a1	1	256	1	17887	0.0143121
GO:0005586	collagen type III trimer	cellular_component	6	Col3a1	1	256	1	17887	0.0143121
GO:0003934	GTP cyclohydrolase I activity	molecular_function	9	Gch1	1	256	1	17887	0.0143121
GO:0070367	negative regulation of hepatocyte differentiation	biological_process	9	Frzb	1	256	1	17887	0.0143121
GO:2000350	positive regulation of CD40 signaling pathway	biological_process	9	Trem2	1	256	1	17887	0.0143121
GO:0009099	valine biosynthetic process	biological_process	11	Bcat1	1	256	1	17887	0.0143121
GO:1902203	negative regulation of hepatocyte growth factor receptor signaling pathway	biological_process	9	Adamts12	1	256	1	17887	0.0143121
GO:0061348	planar cell polarity pathway involved in ventricular septum morphogenesis	biological_process	11	Wnt5a	1	256	1	17887	0.0143121
GO:0042017	interleukin-22 binding	molecular_function	6	Il22ra2	1	256	1	17887	0.0143121
GO:0042466	chemokinesis	biological_process	6	Ccl2	1	256	1	17887	0.0143121
GO:1904953	Wnt signaling pathway involved in midbrain dopaminergic neuron differentiation	biological_process	8	Wnt5a	1	256	1	17887	0.0143121
GO:0061343	cell adhesion involved in heart morphogenesis	biological_process	5	Flrt2	1	256	1	17887	0.0143121
GO:0061354	planar cell polarity pathway involved in pericardium morphogenesis	biological_process	11	Wnt5a	1	256	1	17887	0.0143121
GO:0045819	positive regulation of glycogen catabolic process	biological_process	11	Avpr1a	1	256	1	17887	0.0143121
GO:0002581	negative regulation of antigen processing and presentation of peptide or polysaccharide antigen via MHC class II	biological_process	8	Thbs1	1	256	1	17887	0.0143121
GO:0071873	response to norepinephrine	biological_process	8	Ppargc1a	1	256	1	17887	0.0143121
GO:0061349	planar cell polarity pathway involved in cardiac right atrium morphogenesis	biological_process	11	Wnt5a	1	256	1	17887	0.0143121
GO:0001315	age-dependent response to reactive oxygen species	biological_process	7	Sod2	1	256	1	17887	0.0143121
GO:1903545	cellular response to butyrate	biological_process	8	Cldn1	1	256	1	17887	0.0143121
GO:0070091	glucagon secretion	biological_process	11	Il6	1	256	1	17887	0.0143121
GO:0061347	planar cell polarity pathway involved in outflow tract morphogenesis	biological_process	11	Wnt5a	1	256	1	17887	0.0143121
GO:0003069	acetylcholine-mediated vasodilation involved in regulation of systemic arterial blood pressure	biological_process	8	Sod2	1	256	1	17887	0.0143121
GO:0060332	positive regulation of response to interferon-gamma	biological_process	9	Hpx	1	256	1	17887	0.0143121
GO:0050928	negative regulation of positive chemotaxis	biological_process	9	Angpt2	1	256	1	17887	0.0143121
GO:0017172	cysteine dioxygenase activity	molecular_function	7	Cdo1	1	256	1	17887	0.0143121
GO:0051066	dihydrobiopterin metabolic process	biological_process	7	Gch1	1	256	1	17887	0.0143121
GO:0086029	Purkinje myocyte to ventricular cardiac muscle cell signaling	biological_process	7	Ryr2	1	256	1	17887	0.0143121
GO:0071250	cellular response to nitrite	biological_process	7	Ppargc1a	1	256	1	17887	0.0143121
GO:0018601	4-nitrophenol 2-monooxygenase activity	molecular_function	7	Cyp2e1	1	256	1	17887	0.0143121
GO:0035684	helper T cell extravasation	biological_process	7	Ccl2	1	256	1	17887	0.0143121
GO:1990079	cartilage homeostasis	biological_process	8	Cytl1	1	256	1	17887	0.0143121
GO:2001113	negative regulation of cellular response to hepatocyte growth factor stimulus	biological_process	8	Adamts12	1	256	1	17887	0.0143121
GO:0046880	regulation of follicle-stimulating hormone secretion	biological_process	9	Inhba	1	256	1	17887	0.0143121
GO:1904934	negative regulation of cell proliferation in midbrain	biological_process	8	Wnt5a	1	256	1	17887	0.0143121
GO:0071402	cellular response to lipoprotein particle stimulus	biological_process	5	Ccl2	1	256	1	17887	0.0143121
GO:1990844	interfibrillar mitochondrion	cellular_component	7	Ppargc1a	1	256	1	17887	0.0143121
GO:1903906	regulation of plasma membrane raft polarization	biological_process	7	Gsn	1	256	1	17887	0.0143121
GO:0019448	L-cysteine catabolic process	biological_process	12	Cdo1	1	256	1	17887	0.0143121
GO:0048850	hypophysis morphogenesis	biological_process	7	Wnt5a	1	256	1	17887	0.0143121
GO:0090265	positive regulation of immune complex clearance by monocytes and macrophages	biological_process	8	Ccl2	1	256	1	17887	0.0143121
GO:0060032	notochord regression	biological_process	5	Gli1	1	256	1	17887	0.0143121
GO:0042559	pteridine-containing compound biosynthetic process	biological_process	7	Gch1	1	256	1	17887	0.0143121
GO:1902161	positive regulation of cyclic nucleotide-gated ion channel activity	biological_process	8	Cftr	1	256	1	17887	0.0143121
GO:1901676	positive regulation of histone H3-K27 acetylation	biological_process	12	Lif	1	256	1	17887	0.0143121
GO:0007192	adenylate cyclase-activating serotonin receptor signaling pathway	biological_process	9	LOC103694905	1	256	1	17887	0.0143121
GO:0002541	activation of plasma proteins involved in acute inflammatory response	biological_process	9	F3	1	256	1	17887	0.0143121
GO:0042018	interleukin-22 receptor activity	molecular_function	7	Il22ra2	1	256	1	17887	0.0143121
GO:0019547	arginine catabolic process to ornithine	biological_process	13	Arg1	1	256	1	17887	0.0143121
GO:0098694	regulation of synaptic vesicle budding from presynaptic endocytic zone membrane	biological_process	8	Slc2a4	1	256	1	17887	0.0143121
GO:0061772	xenobiotic transport across blood-nerve barrier	biological_process	7	Cldn1	1	256	1	17887	0.0143121
GO:0097017	renal protein absorption	biological_process	7	Gsn	1	256	1	17887	0.0143121
GO:0070287	ferritin receptor activity	molecular_function	4	Scara5	1	256	1	17887	0.0143121
GO:0031300	intrinsic component of organelle membrane	cellular_component	5	Mreg	1	256	1	17887	0.0143121
GO:0010021	amylopectin biosynthetic process	biological_process	7	Slc2a4	1	256	1	17887	0.0143121
GO:0031751	D4 dopamine receptor binding	molecular_function	8	Ppp1r1b	1	256	1	17887	0.0143121
GO:0001912	positive regulation of leukocyte mediated cytotoxicity	biological_process	7	Ccl2	1	256	1	17887	0.0143121
GO:1901494	regulation of cysteine metabolic process	biological_process	10	Slc7a11	1	256	1	17887	0.0143121
GO:1902548	negative regulation of cellular response to vascular endothelial growth factor stimulus	biological_process	8	Adamts12	1	256	1	17887	0.0143121
GO:0097577	sequestering of iron ion	biological_process	6	Lcn2	1	256	1	17887	0.0143121
GO:0099551	trans-synaptic signaling by neuropeptide, modulating synaptic transmission	biological_process	9	Ntrk2	1	256	1	17887	0.0143121
GO:0140206	dipeptide import across plasma membrane	biological_process	12	Slc7a11	1	256	1	17887	0.0143121
GO:1990843	subsarcolemmal mitochondrion	cellular_component	7	Ppargc1a	1	256	1	17887	0.0143121
GO:0002228	natural killer cell mediated immunity	biological_process	7	Klrd1	1	256	1	17887	0.0143121
GO:0003032	detection of oxygen	biological_process	6	Sod2	1	256	1	17887	0.0143121
GO:0061350	planar cell polarity pathway involved in cardiac muscle tissue morphogenesis	biological_process	11	Wnt5a	1	256	1	17887	0.0143121
GO:0001300	chronological cell aging	biological_process	6	Serpine1	1	256	1	17887	0.0143121
GO:0004790	thioether S-methyltransferase activity	molecular_function	8	Inmt	1	256	1	17887	0.0143121
GO:1902204	positive regulation of hepatocyte growth factor receptor signaling pathway	biological_process	9	Esm1	1	256	1	17887	0.0143121
GO:0060739	mesenchymal-epithelial cell signaling involved in prostate gland development	biological_process	4	Tnc	1	256	1	17887	0.0143121
GO:0043924	suramin binding	molecular_function	5	Ryr2	1	256	1	17887	0.0143121
GO:1903909	regulation of receptor clustering	biological_process	9	Gsn	1	256	1	17887	0.0143121
GO:0031449	regulation of slow-twitch skeletal muscle fiber contraction	biological_process	12	Myh7	1	256	1	17887	0.0143121
GO:1903280	negative regulation of calcium:sodium antiporter activity	biological_process	9	Atp1a2	1	256	1	17887	0.0143121
GO:0051249	regulation of lymphocyte activation	biological_process	7	Lax1	1	256	1	17887	0.0143121
GO:0035491	positive regulation of leukotriene production involved in inflammatory response	biological_process	10	Serpine1	1	256	1	17887	0.0143121
GO:0042108	positive regulation of cytokine biosynthetic process	biological_process	8	Ereg	1	256	1	17887	0.0143121
GO:2000612	regulation of thyroid-stimulating hormone secretion	biological_process	10	Pax8	1	256	1	17887	0.0143121
GO:1903786	regulation of glutathione biosynthetic process	biological_process	8	Slc7a11	1	256	1	17887	0.0143121
GO:0031325	positive regulation of cellular metabolic process	biological_process	7	Ppargc1a	1	256	1	17887	0.0143121
GO:0010963	regulation of L-arginine import	biological_process	9	Arg1	1	256	1	17887	0.0143121
GO:0061044	negative regulation of vascular wound healing	biological_process	9	Serpine1	1	256	1	17887	0.0143121
GO:2000211	regulation of glutamate metabolic process	biological_process	10	Slc7a11	1	256	1	17887	0.0143121
GO:1902379	chemoattractant activity involved in axon guidance	molecular_function	8	Wnt5a	1	256	1	17887	0.0143121
GO:1902618	cellular response to fluoride	biological_process	7	Col1a1	1	256	1	17887	0.0143121
GO:0005584	collagen type I trimer	cellular_component	6	Col1a1	1	256	1	17887	0.0143121
GO:1903903	regulation of establishment of T cell polarity	biological_process	9	Gsn	1	256	1	17887	0.0143121
GO:0006864	pyrimidine nucleotide transport	biological_process	9	Slc25a33	1	256	1	17887	0.0143121
GO:0030748	amine N-methyltransferase activity	molecular_function	8	Inmt	1	256	1	17887	0.0143121
GO:0060606	tube closure	biological_process	6	Wnt5a	1	256	1	17887	0.0143121
GO:0014912	negative regulation of smooth muscle cell migration	biological_process	9	Serpine1;Ppargc1a	2	256	13	17887	0.0143431
GO:0030169	low-density lipoprotein particle binding	molecular_function	7	Trem2;Thbs1	2	256	13	17887	0.0143431
GO:0005614	interstitial matrix	cellular_component	6	Egflam;Tnc	2	256	13	17887	0.0143431
GO:0001823	mesonephros development	biological_process	7	Zbtb16;Pax8	2	256	13	17887	0.0143431
GO:0033762	response to glucagon	biological_process	7	Cdo1;Pfkfb1	2	256	13	17887	0.0143431
GO:0050884	neuromuscular process controlling posture	biological_process	7	Gch1;Slurp1	2	256	13	17887	0.0143431
GO:0035994	response to muscle stretch	biological_process	6	Ryr2;Ankrd1	2	256	13	17887	0.0143431
GO:0051693	actin filament capping	biological_process	10	Gsn;Sptb	2	256	13	17887	0.0143431
GO:0060749	mammary gland alveolus development	biological_process	5	Erbb4;Areg	2	256	13	17887	0.0143431
GO:0035810	positive regulation of urine volume	biological_process	7	Has2;Avpr1a	2	256	13	17887	0.0143431
GO:0017144	drug metabolic process	biological_process	5	Fmo2;Cyp2e1	2	256	13	17887	0.0143431
GO:0006351	transcription, DNA-templated	biological_process	8	Pax8;Nkx2-8;Ablim2;Ppp1r1b;Bcl3	5	256	100	17887	0.0144641
GO:0030017	sarcomere	cellular_component	5	Acta1;Ryr2;Mmp2	3	256	36	17887	0.0146082
GO:0016525	negative regulation of angiogenesis	biological_process	8	Angpt2;Thbs1;Thbs2;Ccl2	4	256	66	17887	0.0147734
GO:0001649	osteoblast differentiation	biological_process	6	Gpnmb;Col1a1;Tmem119;Gli1	4	256	68	17887	0.01633
GO:0071260	cellular response to mechanical stimulus	biological_process	6	Ankrd1;Atp1a2;Col1a1;Nppa	4	256	68	17887	0.01633
GO:0022904	respiratory electron transport chain	biological_process	7	Ppargc1a;Sod2	2	256	14	17887	0.0165772
GO:0061053	somite development	biological_process	7	Frzb;Wnt5a	2	256	14	17887	0.0165772
GO:0040037	negative regulation of fibroblast growth factor receptor signaling pathway	biological_process	9	Thbs1;Wnt5a	2	256	14	17887	0.0165772
GO:0048266	behavioral response to pain	biological_process	4	LOC103694905;Scn9a	2	256	14	17887	0.0165772
GO:0010812	negative regulation of cell-substrate adhesion	biological_process	7	Col1a1;Angpt2	2	256	14	17887	0.0165772
GO:0043537	negative regulation of blood vessel endothelial cell migration	biological_process	11	Thbs1;Angpt2	2	256	14	17887	0.0165772
GO:0031000	response to caffeine	biological_process	6	Il6;Ryr2	2	256	14	17887	0.0165772
GO:0051017	actin filament bundle assembly	biological_process	6	Rnd1;Fam107a;Add2	3	256	39	17887	0.018123
GO:0019221	cytokine-mediated signaling pathway	biological_process	6	Osmr;Il22ra2;Ptprn;Ereg;Ccl2	5	256	106	17887	0.0181845
GO:0005178	integrin binding	molecular_function	6	Itgb8;Esm1;Gpnmb;Col3a1;Thbs1	5	256	106	17887	0.0181845
GO:0016477	cell migration	biological_process	6	Olr59;Lamc3;Wnt5a;Adamts12;Itgb8;Thbs1;Erbb4	7	256	187	17887	0.0182994
GO:0003690	double-stranded DNA binding	molecular_function	7	Nkx2-8;Mnda;Tef;Aff3;Zbtb16	5	256	107	17887	0.0188604
GO:0090303	positive regulation of wound healing	biological_process	9	Cldn1;Ccl2	2	256	15	17887	0.018949
GO:0008106	alcohol dehydrogenase (NADP+) activity	molecular_function	8	Aldh3a1;Akr1c19	2	256	15	17887	0.018949
GO:0014002	astrocyte development	biological_process	7	Ror2;Lamc3	2	256	15	17887	0.018949
GO:0086005	ventricular cardiac muscle cell action potential	biological_process	9	Scn3b;Ryr2	2	256	15	17887	0.018949
GO:0033627	cell adhesion mediated by integrin	biological_process	5	Itgb8;Itga11	2	256	15	17887	0.018949
GO:0008626	granzyme-mediated apoptotic signaling pathway	biological_process	6	Gzmbl1;Gzmbl3	2	256	15	17887	0.018949
GO:0061036	positive regulation of cartilage development	biological_process	7	Wnt5a;Zbtb16	2	256	15	17887	0.018949
GO:0045778	positive regulation of ossification	biological_process	7	Wnt5a;Zbtb16	2	256	15	17887	0.018949
GO:0071361	cellular response to ethanol	biological_process	7	Ccl7;Sod2	2	256	15	17887	0.018949
GO:0007595	lactation	biological_process	8	Erbb4;Atp7b;Cdo1	3	256	40	17887	0.0193899
GO:0009314	response to radiation	biological_process	5	Angpt2;Col3a1;Sod2	3	256	40	17887	0.0193899
GO:0032991	protein-containing complex	cellular_component	3	Acta2;Zbtb16;Sptb;Cftr;Bcl3;Ryr2;Gsn;Gch1;Clnk;Trpc4;Cldn1;Gnat3;Col6a1;Nppa;Mreg	15	256	579	17887	0.0199369
GO:0071549	cellular response to dexamethasone stimulus	biological_process	7	Il6;Arg1;Ccl2	3	256	41	17887	0.0207045
GO:0090103	cochlea morphogenesis	biological_process	6	Frzb;Wnt5a	2	256	16	17887	0.0214541
GO:0050868	negative regulation of T cell activation	biological_process	9	Gpnmb;Lax1	2	256	16	17887	0.0214541
GO:0071354	cellular response to interleukin-6	biological_process	8	Ccl2;Ppargc1a	2	256	16	17887	0.0214541
GO:0006730	one-carbon metabolic process	biological_process	5	Dhfr;Aldh1l2	2	256	16	17887	0.0214541
GO:0002009	morphogenesis of an epithelium	biological_process	6	Wnt5a;Serpinb5	2	256	16	17887	0.0214541
GO:0090026	positive regulation of monocyte chemotaxis	biological_process	9	Ccl2;Serpine1	2	256	16	17887	0.0214541
GO:0035584	calcium-mediated signaling using intracellular calcium source	biological_process	8	Ryr2;Selp	2	256	16	17887	0.0214541
GO:0071542	dopaminergic neuron differentiation	biological_process	7	Wnt5a;LOC103694905	2	256	16	17887	0.0214541
GO:0002526	acute inflammatory response	biological_process	7	Il6;S100a8	2	256	16	17887	0.0214541
GO:0001501	skeletal system development	biological_process	6	Zbtb16;Col1a1;Ror2;Col3a1	4	256	74	17887	0.0216013
GO:0071456	cellular response to hypoxia	biological_process	6	Ankrd1;Hmox1;Ppargc1a;Clca1;Slc2a4	5	256	111	17887	0.0217286
GO:0034765	regulation of ion transmembrane transport	biological_process	8	Scn3b;Scn9a;Kcnj4;Kcna6;Scn7a	5	256	112	17887	0.0224875
GO:0005244	voltage-gated ion channel activity	molecular_function	9	Scn9a;Scn3b;Kcna6;Kcnj4;Scn7a	5	256	113	17887	0.0232634
GO:0018149	peptide cross-linking	biological_process	9	Thbs1;Col3a1	2	256	17	17887	0.0240882
GO:0002026	regulation of the force of heart contraction	biological_process	9	Myh7;Atp1a2	2	256	17	17887	0.0240882
GO:0035567	non-canonical Wnt signaling pathway	biological_process	8	Frzb;Wnt5a	2	256	17	17887	0.0240882
GO:0015301	anion:anion antiporter activity	molecular_function	8	Slc26a4;Slc4a1	2	256	17	17887	0.0240882
GO:0006801	superoxide metabolic process	biological_process	6	Sod2;Noxo1	2	256	17	17887	0.0240882
GO:0048010	vascular endothelial growth factor receptor signaling pathway	biological_process	8	Pgf;Ccl2	2	256	17	17887	0.0240882
GO:0010996	response to auditory stimulus	biological_process	6	Ntrk2;Il6	2	256	17	17887	0.0240882
GO:0030659	cytoplasmic vesicle membrane	cellular_component	6	Sgsm1;Mreg;Slc2a4;Avpr1a	4	256	77	17887	0.0245845
GO:0001756	somitogenesis	biological_process	7	Wnt5a;Tbx18;Ror2	3	256	45	17887	0.026441
GO:0005248	voltage-gated sodium channel activity	molecular_function	9	Scn7a;Scn9a	2	256	18	17887	0.0268471
GO:0071372	cellular response to follicle-stimulating hormone stimulus	biological_process	8	Ppargc1a;Inhba	2	256	18	17887	0.0268471
GO:0009880	embryonic pattern specification	biological_process	5	Erbb4;Zbtb16	2	256	18	17887	0.0268471
GO:0030500	regulation of bone mineralization	biological_process	7	Omd;LOC103690116	2	256	18	17887	0.0268471
GO:1902042	negative regulation of extrinsic apoptotic signaling pathway via death domain receptors	biological_process	11	Hmox1;Serpine1	2	256	18	17887	0.0268471
GO:0034704	calcium channel complex	cellular_component	8	Ryr2;Trpc4	2	256	18	17887	0.0268471
GO:0008299	isoprenoid biosynthetic process	biological_process	8	Idi1;Hmgcs2	2	256	18	17887	0.0268471
GO:0019228	neuronal action potential	biological_process	7	Scn7a;Scn9a	2	256	18	17887	0.0268471
GO:0030506	ankyrin binding	molecular_function	6	Sptb;Slc4a1	2	256	18	17887	0.0268471
GO:0042981	regulation of apoptotic process	biological_process	8	Inhba;Il6;Pax8;Bmp8b;Bcl3;Card14	6	256	160	17887	0.0277718
GO:0008542	visual learning	biological_process	5	Atp1a2;Slc7a11;Ppp1r1b	3	256	46	17887	0.0279946
GO:0042733	embryonic digit morphogenesis	biological_process	6	Wnt5a;Ror2;Zbtb16	3	256	46	17887	0.0279946
GO:0061714	folic acid receptor activity	molecular_function	4	Folr2	1	256	2	17887	0.0284201
GO:0009081	branched-chain amino acid metabolic process	biological_process	9	Bcat1	1	256	2	17887	0.0284201
GO:0090276	regulation of peptide hormone secretion	biological_process	9	Ffar3	1	256	2	17887	0.0284201
GO:0001906	cell killing	biological_process	3	C9	1	256	2	17887	0.0284201
GO:0031699	beta-3 adrenergic receptor binding	molecular_function	8	Adrb3	1	256	2	17887	0.0284201
GO:0005900	oncostatin-M receptor complex	cellular_component	6	Osmr	1	256	2	17887	0.0284201
GO:2001044	regulation of integrin-mediated signaling pathway	biological_process	8	Timp1	1	256	2	17887	0.0284201
GO:0052654	L-leucine transaminase activity	molecular_function	8	Bcat1	1	256	2	17887	0.0284201
GO:0030029	actin filament-based process	biological_process	4	Sele	1	256	2	17887	0.0284201
GO:0031894	V1A vasopressin receptor binding	molecular_function	8	Avpr1a	1	256	2	17887	0.0284201
GO:0044381	glucose import in response to insulin stimulus	biological_process	13	Slc2a4	1	256	2	17887	0.0284201
GO:0070965	positive regulation of neutrophil mediated killing of fungus	biological_process	9	Arg1	1	256	2	17887	0.0284201
GO:0002879	positive regulation of acute inflammatory response to non-antigenic stimulus	biological_process	11	Ffar3	1	256	2	17887	0.0284201
GO:0038112	interleukin-8-mediated signaling pathway	biological_process	7	Cxcr1	1	256	2	17887	0.0284201
GO:0098907	regulation of SA node cell action potential	biological_process	7	Ryr2	1	256	2	17887	0.0284201
GO:0018960	4-nitrophenol metabolic process	biological_process	5	Cyp2e1	1	256	2	17887	0.0284201
GO:0034681	integrin alpha11-beta1 complex	cellular_component	6	Itga11	1	256	2	17887	0.0284201
GO:0015891	siderophore transport	biological_process	7	Lcn2	1	256	2	17887	0.0284201
GO:2000594	positive regulation of metanephric DCT cell differentiation	biological_process	8	Pax8	1	256	2	17887	0.0284201
GO:0060638	mesenchymal-epithelial cell signaling	biological_process	6	Wnt5a	1	256	2	17887	0.0284201
GO:0005171	hepatocyte growth factor receptor binding	molecular_function	7	Esm1	1	256	2	17887	0.0284201
GO:1904692	positive regulation of type B pancreatic cell proliferation	biological_process	9	Ptprn	1	256	2	17887	0.0284201
GO:0060401	cytosolic calcium ion transport	biological_process	11	Ryr2	1	256	2	17887	0.0284201
GO:1904571	positive regulation of selenocysteine incorporation	biological_process	12	LOC100362027	1	256	2	17887	0.0284201
GO:0097050	type B pancreatic cell apoptotic process	biological_process	8	Ryr2	1	256	2	17887	0.0284201
GO:0072511	divalent inorganic cation transport	biological_process	8	Atp7b	1	256	2	17887	0.0284201
GO:0043179	rhythmic excitation	biological_process	10	Scn9a	1	256	2	17887	0.0284201
GO:2000611	positive regulation of thyroid hormone generation	biological_process	8	Pax8	1	256	2	17887	0.0284201
GO:0061026	cardiac muscle tissue regeneration	biological_process	7	Erbb4	1	256	2	17887	0.0284201
GO:0048878	chemical homeostasis	biological_process	6	Pou3f3	1	256	2	17887	0.0284201
GO:1900229	negative regulation of single-species biofilm formation in or on host organism	biological_process	8	Bpifa1	1	256	2	17887	0.0284201
GO:2001027	negative regulation of endothelial cell chemotaxis	biological_process	11	Thbs1	1	256	2	17887	0.0284201
GO:0016098	monoterpenoid metabolic process	biological_process	9	Cyp2e1	1	256	2	17887	0.0284201
GO:0034686	integrin alphav-beta8 complex	cellular_component	6	Itgb8	1	256	2	17887	0.0284201
GO:0021773	striatal medium spiny neuron differentiation	biological_process	9	Inhba	1	256	2	17887	0.0284201
GO:0021551	central nervous system morphogenesis	biological_process	5	Erbb4	1	256	2	17887	0.0284201
GO:0052655	L-valine transaminase activity	molecular_function	8	Bcat1	1	256	2	17887	0.0284201
GO:0070664	negative regulation of leukocyte proliferation	biological_process	8	Ccl12	1	256	2	17887	0.0284201
GO:0071000	response to magnetism	biological_process	5	Sod2	1	256	2	17887	0.0284201
GO:1900215	negative regulation of apoptotic process involved in metanephric collecting duct development	biological_process	10	Pax8	1	256	2	17887	0.0284201
GO:0004392	heme oxygenase (decyclizing) activity	molecular_function	6	Hmox1	1	256	2	17887	0.0284201
GO:0031835	substance P receptor binding	molecular_function	9	Tac4	1	256	2	17887	0.0284201
GO:0005592	collagen type XI trimer	cellular_component	6	Marco	1	256	2	17887	0.0284201
GO:1903027	regulation of opsonization	biological_process	7	C4bpa	1	256	2	17887	0.0284201
GO:0033552	response to vitamin B3	biological_process	9	Ccl2	1	256	2	17887	0.0284201
GO:1905237	response to cyclosporin A	biological_process	6	Ccl2	1	256	2	17887	0.0284201
GO:0070052	collagen V binding	molecular_function	6	Thbs1	1	256	2	17887	0.0284201
GO:0042700	luteinizing hormone signaling pathway	biological_process	6	Ereg	1	256	2	17887	0.0284201
GO:0071799	cellular response to prostaglandin D stimulus	biological_process	8	Tnc	1	256	2	17887	0.0284201
GO:0030538	embryonic genitalia morphogenesis	biological_process	6	Ror2	1	256	2	17887	0.0284201
GO:0002933	lipid hydroxylation	biological_process	8	Cyp2e1	1	256	2	17887	0.0284201
GO:0097159	organic cyclic compound binding	molecular_function	4	Ryr2	1	256	2	17887	0.0284201
GO:0004084	branched-chain-amino-acid transaminase activity	molecular_function	7	Bcat1	1	256	2	17887	0.0284201
GO:0051885	positive regulation of timing of anagen	biological_process	10	Wnt5a	1	256	2	17887	0.0284201
GO:0003401	axis elongation	biological_process	6	Wnt5a	1	256	2	17887	0.0284201
GO:0046452	dihydrofolate metabolic process	biological_process	7	Dhfr	1	256	2	17887	0.0284201
GO:0048021	regulation of melanin biosynthetic process	biological_process	8	Slc7a11	1	256	2	17887	0.0284201
GO:0016813	hydrolase activity, acting on carbon-nitrogen (but not peptide) bonds, in linear amidines	molecular_function	6	Arg1	1	256	2	17887	0.0284201
GO:0046473	phosphatidic acid metabolic process	biological_process	9	Pla2g2a	1	256	2	17887	0.0284201
GO:1903981	enterobactin binding	molecular_function	6	Lcn2	1	256	2	17887	0.0284201
GO:0043512	inhibin A complex	cellular_component	5	Inhba	1	256	2	17887	0.0284201
GO:0031750	D3 dopamine receptor binding	molecular_function	8	Ppp1r1b	1	256	2	17887	0.0284201
GO:0006931	substrate-dependent cell migration, cell attachment to substrate	biological_process	6	Tnfrsf12a	1	256	2	17887	0.0284201
GO:0097154	GABAergic neuron differentiation	biological_process	7	Inhba	1	256	2	17887	0.0284201
GO:0006788	heme oxidation	biological_process	9	Hmox1	1	256	2	17887	0.0284201
GO:0016155	formyltetrahydrofolate dehydrogenase activity	molecular_function	7	Aldh1l2	1	256	2	17887	0.0284201
GO:0002720	positive regulation of cytokine production involved in immune response	biological_process	8	Ffar3	1	256	2	17887	0.0284201
GO:0002588	positive regulation of antigen processing and presentation of peptide antigen via MHC class II	biological_process	9	Trem2	1	256	2	17887	0.0284201
GO:0042322	negative regulation of circadian sleep/wake cycle, REM sleep	biological_process	9	LOC103694905	1	256	2	17887	0.0284201
GO:2000552	negative regulation of T-helper 2 cell cytokine production	biological_process	12	Arg1	1	256	2	17887	0.0284201
GO:0004421	hydroxymethylglutaryl-CoA synthase activity	molecular_function	7	Hmgcs2	1	256	2	17887	0.0284201
GO:0034775	glutathione transmembrane transport	biological_process	10	Slc7a11	1	256	2	17887	0.0284201
GO:0003062	regulation of heart rate by chemical signal	biological_process	10	Ffar3	1	256	2	17887	0.0284201
GO:1905286	serine-type peptidase complex	cellular_component	6	F3	1	256	2	17887	0.0284201
GO:0044299	C-fiber	cellular_component	7	Ccl2	1	256	2	17887	0.0284201
GO:0035377	transepithelial water transport	biological_process	8	Cftr	1	256	2	17887	0.0284201
GO:0060026	convergent extension	biological_process	7	Wnt5a	1	256	2	17887	0.0284201
GO:0009082	branched-chain amino acid biosynthetic process	biological_process	10	Bcat1	1	256	2	17887	0.0284201
GO:0033257	Bcl3/NF-kappaB2 complex	cellular_component	5	Bcl3	1	256	2	17887	0.0284201
GO:0035634	response to stilbenoid	biological_process	7	Slco1a1	1	256	2	17887	0.0284201
GO:0072592	oxygen metabolic process	biological_process	6	Fmo2	1	256	2	17887	0.0284201
GO:0014728	regulation of the force of skeletal muscle contraction	biological_process	12	Myh7	1	256	2	17887	0.0284201
GO:1905517	macrophage migration	biological_process	6	Ror2	1	256	2	17887	0.0284201
GO:0010751	negative regulation of nitric oxide mediated signal transduction	biological_process	10	Thbs1	1	256	2	17887	0.0284201
GO:0009258	10-formyltetrahydrofolate catabolic process	biological_process	10	Aldh1l2	1	256	2	17887	0.0284201
GO:2000098	negative regulation of smooth muscle cell-matrix adhesion	biological_process	9	Serpine1	1	256	2	17887	0.0284201
GO:0039003	pronephric field specification	biological_process	7	Pax8	1	256	2	17887	0.0284201
GO:0060775	planar cell polarity pathway involved in gastrula mediolateral intercalation	biological_process	10	Wnt5a	1	256	2	17887	0.0284201
GO:0051799	negative regulation of hair follicle development	biological_process	8	Inhba	1	256	2	17887	0.0284201
GO:0004531	deoxyribonuclease II activity	molecular_function	10	Dnase2b	1	256	2	17887	0.0284201
GO:0070722	Tle3-Aes complex	cellular_component	7	Tbx18	1	256	2	17887	0.0284201
GO:0098966	perisynaptic extracellular matrix	cellular_component	5	Tnc	1	256	2	17887	0.0284201
GO:0072073	kidney epithelium development	biological_process	7	Pax8	1	256	2	17887	0.0284201
GO:1905049	negative regulation of metallopeptidase activity	biological_process	11	Timp1	1	256	2	17887	0.0284201
GO:0051284	positive regulation of sequestering of calcium ion	biological_process	7	Ryr2	1	256	2	17887	0.0284201
GO:0048635	negative regulation of muscle organ development	biological_process	8	Il6	1	256	2	17887	0.0284201
GO:0008294	calcium- and calmodulin-responsive adenylate cyclase activity	molecular_function	6	Adcy1	1	256	2	17887	0.0284201
GO:0072305	negative regulation of mesenchymal cell apoptotic process involved in metanephric nephron morphogenesis	biological_process	10	Pax8	1	256	2	17887	0.0284201
GO:0001306	age-dependent response to oxidative stress	biological_process	6	Sod2	1	256	2	17887	0.0284201
GO:0002605	negative regulation of dendritic cell antigen processing and presentation	biological_process	8	Thbs1	1	256	2	17887	0.0284201
GO:0048022	negative regulation of melanin biosynthetic process	biological_process	9	Wnt5a	1	256	2	17887	0.0284201
GO:0015988	energy coupled proton transmembrane transport, against electrochemical gradient	biological_process	10	Atp1a2	1	256	2	17887	0.0284201
GO:0051208	sequestering of calcium ion	biological_process	5	Atp7b	1	256	2	17887	0.0284201
GO:0071306	cellular response to vitamin E	biological_process	8	Col1a1	1	256	2	17887	0.0284201
GO:1903766	positive regulation of potassium ion export across plasma membrane	biological_process	12	Nppa	1	256	2	17887	0.0284201
GO:0051552	flavone metabolic process	biological_process	6	Ppargc1a	1	256	2	17887	0.0284201
GO:0035606	peptidyl-cysteine S-trans-nitrosylation	biological_process	11	S100a9	1	256	2	17887	0.0284201
GO:0071231	cellular response to folic acid	biological_process	7	Folr2	1	256	2	17887	0.0284201
GO:0052656	L-isoleucine transaminase activity	molecular_function	8	Bcat1	1	256	2	17887	0.0284201
GO:0042701	progesterone secretion	biological_process	7	Inhba	1	256	2	17887	0.0284201
GO:0042412	taurine biosynthetic process	biological_process	7	Cdo1	1	256	2	17887	0.0284201
GO:0045959	negative regulation of complement activation, classical pathway	biological_process	13	C4bpa	1	256	2	17887	0.0284201
GO:0046885	regulation of hormone biosynthetic process	biological_process	8	Ffar3	1	256	2	17887	0.0284201
GO:0010721	negative regulation of cell development	biological_process	8	Frzb	1	256	2	17887	0.0284201
GO:0004053	arginase activity	molecular_function	7	Arg1	1	256	2	17887	0.0284201
GO:0072233	metanephric thick ascending limb development	biological_process	9	Pou3f3	1	256	2	17887	0.0284201
GO:0051459	regulation of corticotropin secretion	biological_process	8	Avpr1a	1	256	2	17887	0.0284201
GO:0048160	primary follicle stage	biological_process	6	Ereg	1	256	2	17887	0.0284201
GO:0014891	striated muscle atrophy	biological_process	8	Gsn	1	256	2	17887	0.0284201
GO:0043682	copper-transporting ATPase activity	molecular_function	11	Atp7b	1	256	2	17887	0.0284201
GO:1900218	negative regulation of apoptotic process involved in metanephric nephron tubule development	biological_process	10	Pax8	1	256	2	17887	0.0284201
GO:1901558	response to metformin	biological_process	6	Ppargc1a	1	256	2	17887	0.0284201
GO:0001781	neutrophil apoptotic process	biological_process	8	Il6	1	256	2	17887	0.0284201
GO:0006030	chitin metabolic process	biological_process	7	Chia	1	256	2	17887	0.0284201
GO:0019959	interleukin-8 binding	molecular_function	8	Cxcr1	1	256	2	17887	0.0284201
GO:0070699	type II activin receptor binding	molecular_function	9	Inhba	1	256	2	17887	0.0284201
GO:0003220	left ventricular cardiac muscle tissue morphogenesis	biological_process	9	Ryr2	1	256	2	17887	0.0284201
GO:0060809	mesodermal to mesenchymal transition involved in gastrulation	biological_process	8	Wnt5a	1	256	2	17887	0.0284201
GO:0032764	negative regulation of mast cell cytokine production	biological_process	9	Hmox1	1	256	2	17887	0.0284201
GO:0072385	minus-end-directed organelle transport along microtubule	biological_process	10	Mreg	1	256	2	17887	0.0284201
GO:0045988	negative regulation of striated muscle contraction	biological_process	10	Atp1a2	1	256	2	17887	0.0284201
GO:0060067	cervix development	biological_process	6	Wnt5a	1	256	2	17887	0.0284201
GO:1903012	positive regulation of bone development	biological_process	7	Tmem119	1	256	2	17887	0.0284201
GO:0038195	urokinase plasminogen activator signaling pathway	biological_process	6	Slurp1	1	256	2	17887	0.0284201
GO:0004918	interleukin-8 receptor activity	molecular_function	10	Cxcr1	1	256	2	17887	0.0284201
GO:1902943	positive regulation of voltage-gated chloride channel activity	biological_process	10	Cftr	1	256	2	17887	0.0284201
GO:0038102	activin receptor antagonist activity	molecular_function	7	Fst	1	256	2	17887	0.0284201
GO:0060599	lateral sprouting involved in mammary gland duct morphogenesis	biological_process	8	Wnt5a	1	256	2	17887	0.0284201
GO:1900135	positive regulation of renin secretion into blood stream	biological_process	11	Olr59	1	256	2	17887	0.0284201
GO:0036518	chemorepulsion of dopaminergic neuron axon	biological_process	8	Wnt5a	1	256	2	17887	0.0284201
GO:0023030	MHC class Ib protein binding, via antigen binding groove	molecular_function	8	Klrd1	1	256	2	17887	0.0284201
GO:0051354	negative regulation of oxidoreductase activity	biological_process	7	Gzma	1	256	2	17887	0.0284201
GO:0006882	cellular zinc ion homeostasis	biological_process	12	Atp7b;Mt2A	2	256	19	17887	0.0297268
GO:0042629	mast cell granule	cellular_component	9	Tac4;Nppa	2	256	19	17887	0.0297268
GO:0042832	defense response to protozoan	biological_process	8	Arg1;Il6	2	256	19	17887	0.0297268
GO:0030318	melanocyte differentiation	biological_process	7	Olr59;Mreg	2	256	19	17887	0.0297268
GO:0042383	sarcolemma	cellular_component	5	Slc2a4;Atp1a2;Col6a1;Krt8	4	256	82	17887	0.0300848
GO:0009408	response to heat	biological_process	5	Ccl2;Cpb2;Il6	3	256	48	17887	0.0312443
GO:0015629	actin cytoskeleton	cellular_component	7	Rnd1;Gsn;Acta1;Fam107a;Acta2;Ablim2	6	256	165	17887	0.0316179
GO:0014070	response to organic cyclic compound	biological_process	6	Areg;Angpt2;Slc7a11;Ppargc1a;Aldh3a1;Il6	6	256	165	17887	0.0316179
GO:0007169	transmembrane receptor protein tyrosine kinase signaling pathway	biological_process	7	Erbb4;Ror2;Ntrk2;Clnk	4	256	84	17887	0.0324723
GO:0051000	positive regulation of nitric-oxide synthase activity	biological_process	9	Dhfr;Gch1	2	256	20	17887	0.0327233
GO:0046427	positive regulation of receptor signaling pathway via JAK-STAT	biological_process	10	Il6;Erbb4	2	256	20	17887	0.0327233
GO:0055093	response to hyperoxia	biological_process	5	Sod2;Col1a1	2	256	20	17887	0.0327233
GO:0043410	positive regulation of MAPK cascade	biological_process	11	Ntrk2;Ror2;Lif;Adrb3	4	256	85	17887	0.0337065
GO:0045095	keratin filament	cellular_component	8	Krt76;Krt15;Krt8	3	256	50	17887	0.0346831
GO:0051412	response to corticosterone	biological_process	9	Avpr1a;LOC103694905	2	256	21	17887	0.0358327
GO:0060045	positive regulation of cardiac muscle cell proliferation	biological_process	8	Gli1;Erbb4	2	256	21	17887	0.0358327
GO:0030041	actin filament polymerization	biological_process	8	Gsn;Fam107a	2	256	21	17887	0.0358327
GO:0010800	positive regulation of peptidyl-threonine phosphorylation	biological_process	11	Cemip;Wnt5a	2	256	21	17887	0.0358327
GO:0042311	vasodilation	biological_process	10	Sod2;Gch1	2	256	21	17887	0.0358327
GO:0014850	response to muscle activity	biological_process	5	Ryr2;Ppargc1a	2	256	21	17887	0.0358327
GO:0007159	leukocyte cell-cell adhesion	biological_process	6	Selp;Sele	2	256	21	17887	0.0358327
GO:0007599	hemostasis	biological_process	6	Tfpi2;Cpb2	2	256	21	17887	0.0358327
GO:0006879	cellular iron ion homeostasis	biological_process	12	Scara5;Hpx;Hmox1	3	256	51	17887	0.0364729
GO:0097110	scaffold protein binding	molecular_function	5	Krt8;Trem2;Krt15	3	256	51	17887	0.0364729
GO:0008237	metallopeptidase activity	molecular_function	7	Mmp2;Adamts4;Adamts12;Cpb2;Ecel1	5	256	128	17887	0.0370133
GO:0030154	cell differentiation	biological_process	5	Ror2;Ntrk2;Nkx2-8;Angpt2;Pax8;Fst;Heyl;Foxs1;Pgf;Ereg;Etv4	11	256	416	17887	0.0377162
GO:0030097	hemopoiesis	biological_process	7	Zbtb16;Add2;Sod2	3	256	52	17887	0.0383093
GO:1901215	negative regulation of neuron death	biological_process	8	Il6;Gpnmb;Ppargc1a	3	256	52	17887	0.0383093
GO:0015698	inorganic anion transport	biological_process	8	Slc4a1;Slc26a4	2	256	22	17887	0.0390511
GO:0045893	positive regulation of transcription, DNA-templated	biological_process	9	Erbb4;Il6;Col1a1;Gli1;Klf15;Ror2;Zbtb16;Pax8;Pou3f3;Wnt5a;Ppargc1a;Bcl3;Inhba	13	256	525	17887	0.0395798
GO:0051965	positive regulation of synapse assembly	biological_process	7	Ntrk2;Thbs2;Flrt2	3	256	53	17887	0.0401921
GO:0001568	blood vessel development	biological_process	5	Foxs1;Col1a1;Col3a1	3	256	53	17887	0.0401921
GO:0004714	transmembrane receptor protein tyrosine kinase activity	molecular_function	9	Ntrk2;Erbb4;Ror2	3	256	53	17887	0.0401921
GO:0060395	SMAD protein signal transduction	biological_process	5	Inhba;Bmp8b;Ror2	3	256	53	17887	0.0401921
GO:0005543	phospholipid binding	molecular_function	5	F3;Pla2g2a;Trem2;Sptb	4	256	90	17887	0.0402839
GO:0006814	sodium ion transport	biological_process	9	Scn3b;Atp1a2;Scn9a;Scn7a	4	256	91	17887	0.0416808
GO:0055085	transmembrane transport	biological_process	6	Kcna6;Trpc4;Cftr;Slc15a2;Ryr2;Slc26a4;Slc7a11;Slc2a4;Scn7a;Slco1a1;Slc6a7;Scn9a;Trpm5	13	256	530	17887	0.042152
GO:0014916	regulation of lung blood pressure	biological_process	6	Gch1	1	256	3	17887	0.042327
GO:0046649	lymphocyte activation	biological_process	6	Lax1	1	256	3	17887	0.042327
GO:0048014	Tie signaling pathway	biological_process	8	Angpt2	1	256	3	17887	0.042327
GO:1902261	positive regulation of delayed rectifier potassium channel activity	biological_process	10	Nppa	1	256	3	17887	0.042327
GO:0038179	neurotrophin signaling pathway	biological_process	6	Ntrk2	1	256	3	17887	0.042327
GO:0018479	benzaldehyde dehydrogenase (NAD+) activity	molecular_function	8	Aldh3a1	1	256	3	17887	0.042327
GO:0021869	forebrain ventricular zone progenitor cell division	biological_process	5	Pou3f3	1	256	3	17887	0.042327
GO:0031752	D5 dopamine receptor binding	molecular_function	8	Ppp1r1b	1	256	3	17887	0.042327
GO:0045837	negative regulation of membrane potential	biological_process	6	Il6	1	256	3	17887	0.042327
GO:0014829	vascular smooth muscle contraction	biological_process	8	Acta2	1	256	3	17887	0.042327
GO:0030485	smooth muscle contractile fiber	cellular_component	7	Acta2	1	256	3	17887	0.042327
GO:0072278	metanephric comma-shaped body morphogenesis	biological_process	6	Pax8	1	256	3	17887	0.042327
GO:0001992	regulation of systemic arterial blood pressure by vasopressin	biological_process	9	Avpr1a	1	256	3	17887	0.042327
GO:0042631	cellular response to water deprivation	biological_process	6	Avpr1a	1	256	3	17887	0.042327
GO:0031092	platelet alpha granule membrane	cellular_component	8	Selp	1	256	3	17887	0.042327
GO:0030478	actin cap	cellular_component	6	Gsn	1	256	3	17887	0.042327
GO:1901509	regulation of endothelial tube morphogenesis	biological_process	8	Adamts12	1	256	3	17887	0.042327
GO:0051970	negative regulation of transmission of nerve impulse	biological_process	8	Avpr1a	1	256	3	17887	0.042327
GO:0021938	smoothened signaling pathway involved in regulation of cerebellar granule cell precursor cell proliferation	biological_process	7	Gli1	1	256	3	17887	0.042327
GO:1990502	dense core granule maturation	biological_process	6	Ptprn	1	256	3	17887	0.042327
GO:2000427	positive regulation of apoptotic cell clearance	biological_process	9	Ccl2	1	256	3	17887	0.042327
GO:0070095	fructose-6-phosphate binding	molecular_function	6	Pfkfb1	1	256	3	17887	0.042327
GO:0014063	negative regulation of serotonin secretion	biological_process	9	LOC103694905	1	256	3	17887	0.042327
GO:0010574	regulation of vascular endothelial growth factor production	biological_process	7	Ccl2	1	256	3	17887	0.042327
GO:1901201	regulation of extracellular matrix assembly	biological_process	6	Has2	1	256	3	17887	0.042327
GO:0051964	negative regulation of synapse assembly	biological_process	8	Wnt5a	1	256	3	17887	0.042327
GO:0035673	oligopeptide transmembrane transporter activity	molecular_function	7	Slc15a2	1	256	3	17887	0.042327
GO:0072359	circulatory system development	biological_process	6	Heyl	1	256	3	17887	0.042327
GO:1990817	RNA adenylyltransferase activity	molecular_function	9	Tent5b	1	256	3	17887	0.042327
GO:0032982	myosin filament	cellular_component	5	Myh7	1	256	3	17887	0.042327
GO:0001573	ganglioside metabolic process	biological_process	10	Itgb8	1	256	3	17887	0.042327
GO:2000346	negative regulation of hepatocyte proliferation	biological_process	9	Cpb2	1	256	3	17887	0.042327
GO:0046483	heterocycle metabolic process	biological_process	5	Cyp2e1	1	256	3	17887	0.042327
GO:0098910	regulation of atrial cardiac muscle cell action potential	biological_process	7	Ryr2	1	256	3	17887	0.042327
GO:0060688	regulation of morphogenesis of a branching structure	biological_process	7	Pgf	1	256	3	17887	0.042327
GO:0098904	regulation of AV node cell action potential	biological_process	7	Ryr2	1	256	3	17887	0.042327
GO:1900625	positive regulation of monocyte aggregation	biological_process	9	Has2	1	256	3	17887	0.042327
GO:0099183	trans-synaptic signaling by BDNF, modulating synaptic transmission	biological_process	9	Ntrk2	1	256	3	17887	0.042327
GO:0003331	positive regulation of extracellular matrix constituent secretion	biological_process	9	Cpb2	1	256	3	17887	0.042327
GO:0031649	heat generation	biological_process	6	Adrb3	1	256	3	17887	0.042327
GO:0034505	tooth mineralization	biological_process	7	Col1a1	1	256	3	17887	0.042327
GO:1900127	positive regulation of hyaluronan biosynthetic process	biological_process	9	Has2	1	256	3	17887	0.042327
GO:0010822	positive regulation of mitochondrion organization	biological_process	9	Ppargc1a	1	256	3	17887	0.042327
GO:1904717	regulation of AMPA glutamate receptor clustering	biological_process	9	Slc7a11	1	256	3	17887	0.042327
GO:0002025	norepinephrine-epinephrine-mediated vasodilation involved in regulation of systemic arterial blood pressure	biological_process	8	Adrb3	1	256	3	17887	0.042327
GO:0015218	pyrimidine nucleotide transmembrane transporter activity	molecular_function	7	Slc25a33	1	256	3	17887	0.042327
GO:0045226	extracellular polysaccharide biosynthetic process	biological_process	9	Has2	1	256	3	17887	0.042327
GO:1902174	positive regulation of keratinocyte apoptotic process	biological_process	11	Gsn	1	256	3	17887	0.042327
GO:0060414	aorta smooth muscle tissue morphogenesis	biological_process	7	Col3a1	1	256	3	17887	0.042327
GO:0004028	3-chloroallyl aldehyde dehydrogenase activity	molecular_function	7	Aldh3a1	1	256	3	17887	0.042327
GO:0060447	bud outgrowth involved in lung branching	biological_process	8	Tnc	1	256	3	17887	0.042327
GO:0060279	positive regulation of ovulation	biological_process	7	Inhba	1	256	3	17887	0.042327
GO:0005146	leukemia inhibitory factor receptor binding	molecular_function	7	Lif	1	256	3	17887	0.042327
GO:0009991	response to extracellular stimulus	biological_process	5	Acta1	1	256	3	17887	0.042327
GO:2000345	regulation of hepatocyte proliferation	biological_process	8	Gli1	1	256	3	17887	0.042327
GO:0071953	elastic fiber	cellular_component	5	Eln	1	256	3	17887	0.042327
GO:0004924	oncostatin-M receptor activity	molecular_function	7	Osmr	1	256	3	17887	0.042327
GO:0043121	neurotrophin binding	molecular_function	6	Ntrk2	1	256	3	17887	0.042327
GO:0070295	renal water absorption	biological_process	7	Has2	1	256	3	17887	0.042327
GO:0010572	positive regulation of platelet activation	biological_process	9	Selp	1	256	3	17887	0.042327
GO:0071332	cellular response to fructose stimulus	biological_process	10	Ppargc1a	1	256	3	17887	0.042327
GO:1900212	negative regulation of mesenchymal cell apoptotic process involved in metanephros development	biological_process	10	Pax8	1	256	3	17887	0.042327
GO:0045079	negative regulation of chemokine biosynthetic process	biological_process	9	Il6	1	256	3	17887	0.042327
GO:0071403	cellular response to high density lipoprotein particle stimulus	biological_process	6	Ccl2	1	256	3	17887	0.042327
GO:0005030	neurotrophin receptor activity	molecular_function	5	Ntrk2	1	256	3	17887	0.042327
GO:0071801	regulation of podosome assembly	biological_process	7	Gsn	1	256	3	17887	0.042327
GO:0010641	positive regulation of platelet-derived growth factor receptor signaling pathway	biological_process	9	F3	1	256	3	17887	0.042327
GO:0006534	cysteine metabolic process	biological_process	10	Cdo1	1	256	3	17887	0.042327
GO:0030549	acetylcholine receptor activator activity	molecular_function	6	Slurp1	1	256	3	17887	0.042327
GO:0015111	iodide transmembrane transporter activity	molecular_function	8	Slc26a4	1	256	3	17887	0.042327
GO:0008065	establishment of blood-nerve barrier	biological_process	8	Cldn1	1	256	3	17887	0.042327
GO:0090461	glutamate homeostasis	biological_process	10	Slc7a11	1	256	3	17887	0.042327
GO:0038031	non-canonical Wnt signaling pathway via JNK cascade	biological_process	10	Wnt5a	1	256	3	17887	0.042327
GO:0034189	very-low-density lipoprotein particle binding	molecular_function	5	Trem2	1	256	3	17887	0.042327
GO:1904640	response to methionine	biological_process	7	Ppargc1a	1	256	3	17887	0.042327
GO:0070673	response to interleukin-18	biological_process	7	Cldn1	1	256	3	17887	0.042327
GO:0055056	D-glucose transmembrane transporter activity	molecular_function	10	Slc2a4	1	256	3	17887	0.042327
GO:0019932	second-messenger-mediated signaling	biological_process	6	Ptprn	1	256	3	17887	0.042327
GO:0072014	proximal tubule development	biological_process	8	Heyl	1	256	3	17887	0.042327
GO:0047756	chondroitin 4-sulfotransferase activity	molecular_function	8	Chst13	1	256	3	17887	0.042327
GO:0004031	aldehyde oxidase activity	molecular_function	7	Aox3	1	256	3	17887	0.042327
GO:0021696	cerebellar cortex morphogenesis	biological_process	5	Gli1	1	256	3	17887	0.042327
GO:0007442	hindgut morphogenesis	biological_process	5	Wnt5a	1	256	3	17887	0.042327
GO:1990519	pyrimidine nucleotide import into mitochondrion	biological_process	10	Slc25a33	1	256	3	17887	0.042327
GO:0001550	ovarian cumulus expansion	biological_process	5	Ereg	1	256	3	17887	0.042327
GO:0045188	regulation of circadian sleep/wake cycle, non-REM sleep	biological_process	8	Il6	1	256	3	17887	0.042327
GO:0033623	regulation of integrin activation	biological_process	7	Selp	1	256	3	17887	0.042327
GO:0090258	negative regulation of mitochondrial fission	biological_process	10	Ppargc1a	1	256	3	17887	0.042327
GO:0005219	ryanodine-sensitive calcium-release channel activity	molecular_function	10	Ryr2	1	256	3	17887	0.042327
GO:0018119	peptidyl-cysteine S-nitrosylation	biological_process	10	S100a8	1	256	3	17887	0.042327
GO:0060157	urinary bladder development	biological_process	6	Wnt5a	1	256	3	17887	0.042327
GO:0021891	olfactory bulb interneuron development	biological_process	9	Wnt5a	1	256	3	17887	0.042327
GO:0030492	hemoglobin binding	molecular_function	5	Slc4a1	1	256	3	17887	0.042327
GO:0043084	penile erection	biological_process	5	Avpr1a	1	256	3	17887	0.042327
GO:0003402	planar cell polarity pathway involved in axis elongation	biological_process	10	Wnt5a	1	256	3	17887	0.042327
GO:0004030	aldehyde dehydrogenase [NAD(P)+] activity	molecular_function	7	Aldh3a1	1	256	3	17887	0.042327
GO:0048133	male germ-line stem cell asymmetric division	biological_process	8	Zbtb16	1	256	3	17887	0.042327
GO:0006942	regulation of striated muscle contraction	biological_process	9	Atp1a2	1	256	3	17887	0.042327
GO:0034021	response to silicon dioxide	biological_process	6	Sod2	1	256	3	17887	0.042327
GO:0044853	plasma membrane raft	cellular_component	7	Has2;Add2	2	256	23	17887	0.0423749
GO:0097009	energy homeostasis	biological_process	5	Ppargc1a;Bmp8b	2	256	23	17887	0.0423749
GO:2001244	positive regulation of intrinsic apoptotic signaling pathway	biological_process	10	S100a8;S100a9	2	256	23	17887	0.0423749
GO:0036120	cellular response to platelet-derived growth factor stimulus	biological_process	6	Has2;Ccl2	2	256	23	17887	0.0423749
GO:0016021	integral component of membrane	cellular_component	5	Armh4;Klrd1;Ereg;Ffar3;Avpr1a;F3;Fmo2;Tmprss11a;AABR07044397;Cldn1;Slc2a4;Scn9a;Cldn11;Ptprn;Itga11;RGD1559482;Scara5;Kcna6;Itgb8;Has2;Sele;Cd79a;Tm4sf19;Adtrp;Trpm5;Slco1a1;Ryr2;Slc15a2;Aldh3a1;Rprml;Ecel1;Nat8l;Slc26a4;Atp1a2;Tlr5;Slc6a7;Erbb4;LOC103694905;Cox8b;Areg;Gabrp;Osmr;Lax1;Slfn4;Adcy1;Slc25a33;Galnt14;Clca1;Selp;Fam163a;Cftr;Klri2;Adrb3;Flrt2;Tnfrsf12a;AABR07006278;Shisa3;Kcnj4;Olr59;…	81	256	4774	17887	0.0433288
GO:0051603	proteolysis involved in cellular protein catabolic process	biological_process	8	Cpvl;Gzma;Adamts12	3	256	55	17887	0.0440956
GO:0051260	protein homooligomerization	biological_process	8	Kcna6;C9;Cldn1;Hmox1;Gch1;Sod2	6	256	179	17887	0.0441775
GO:0005882	intermediate filament	cellular_component	7	Krt76;Krt8;Krt15;RGD1305207	4	256	93	17887	0.0445561
GO:0043236	laminin binding	molecular_function	5	Nid1;Thbs1	2	256	24	17887	0.0458003
GO:0008305	integrin complex	cellular_component	5	Itga11;Itgb8	2	256	24	17887	0.0458003
GO:0043392	negative regulation of DNA binding	biological_process	7	Gzma;Hmox1	2	256	24	17887	0.0458003
GO:2000352	negative regulation of endothelial cell apoptotic process	biological_process	11	Serpine1;Scg2	2	256	24	17887	0.0458003
GO:0071353	cellular response to interleukin-4	biological_process	8	Il24;Arg1	2	256	24	17887	0.0458003
GO:0004181	metallocarboxypeptidase activity	molecular_function	9	Cpz;Cpb2	2	256	24	17887	0.0458003
GO:0006919	activation of cysteine-type endopeptidase activity involved in apoptotic process	biological_process	11	S100a9;S100a8;F3	3	256	56	17887	0.0461157
GO:0030018	Z disc	cellular_component	5	Krt8;Ryr2;Myh7;Scn3b	4	256	95	17887	0.04754
GO:0001570	vasculogenesis	biological_process	6	Itgb8;Has2;Ntrk2	3	256	57	17887	0.0481809
GO:0019233	sensory perception of pain	biological_process	7	Scn9a;Ccl2;Scn3b	3	256	57	17887	0.0481809
GO:0050727	regulation of inflammatory response	biological_process	8	Adamts12;S100a9;S100a8	3	256	57	17887	0.0481809
GO:0007010	cytoskeleton organization	biological_process	6	Krt15;Ablim2;Krt76;Sptb	4	256	96	17887	0.0490726
GO:0030507	spectrin binding	molecular_function	6	Ptprn;Add2	2	256	25	17887	0.0493238
GO:0006082	organic acid metabolic process	biological_process	5	Cyp2e1;Fmo2	2	256	25	17887	0.0493238
GO:0051216	cartilage development	biological_process	6	Timp1;Zbtb16;Itgb8	3	256	58	17887	0.0502908
GO:0004497	monooxygenase activity	molecular_function	5	Cyp2e1;Fmo6;Fmo2;Fmo3	4	256	97	17887	0.0506322
GO:0007601	visual perception	biological_process	8	Lamc3;Col1a1;Gnat3;Nyx	4	256	98	17887	0.0522188
GO:0043433	negative regulation of DNA-binding transcription factor activity	biological_process	6	Foxs1;Hmox1;Heyl	3	256	59	17887	0.0524451
GO:0071333	cellular response to glucose stimulus	biological_process	10	Ppargc1a;Cpb2;Ccl2	3	256	59	17887	0.0524451
GO:0090314	positive regulation of protein targeting to membrane	biological_process	11	Ccl2;Cemip	2	256	26	17887	0.0529419
GO:0050807	regulation of synapse organization	biological_process	7	Wnt5a;Slc7a11	2	256	26	17887	0.0529419
GO:0035116	embryonic hindlimb morphogenesis	biological_process	8	Zbtb16;Aff3	2	256	26	17887	0.0529419
GO:0060325	face morphogenesis	biological_process	5	Col1a1;Mmp2	2	256	26	17887	0.0529419
GO:0051881	regulation of mitochondrial membrane potential	biological_process	6	Slc25a33;Sod2	2	256	26	17887	0.0529419
GO:2000134	negative regulation of G1/S transition of mitotic cell cycle	biological_process	10	Fam107a;Gpnmb	2	256	26	17887	0.0529419
GO:0001958	endochondral ossification	biological_process	6	Col1a1;Tmem119	2	256	26	17887	0.0529419
GO:0009615	response to virus	biological_process	7	Lcn2;Bcl3;Acta2	3	256	60	17887	0.0546433
GO:0043025	neuronal cell body	cellular_component	5	Ric3;Ror2;Trpm5;Ppargc1a;Ppp1r1b;Ntrk2;Arg1;LOC103694905;Ccl2;Ptprn	10	256	391	17887	0.0555152
GO:0009750	response to fructose	biological_process	9	Ppargc1a	1	256	4	17887	0.0560356
GO:0042501	serine phosphorylation of STAT protein	biological_process	11	Il24	1	256	4	17887	0.0560356
GO:1901896	positive regulation of ATPase-coupled calcium transmembrane transporter activity	biological_process	9	Ryr2	1	256	4	17887	0.0560356
GO:0002248	connective tissue replacement involved in inflammatory response wound healing	biological_process	6	Timp1	1	256	4	17887	0.0560356
GO:0006929	substrate-dependent cell migration	biological_process	7	Itga11	1	256	4	17887	0.0560356
GO:1903025	regulation of RNA polymerase II regulatory region sequence-specific DNA binding	biological_process	8	Lif	1	256	4	17887	0.0560356
GO:0051599	response to hydrostatic pressure	biological_process	5	Krt8	1	256	4	17887	0.0560356
GO:1903588	negative regulation of blood vessel endothelial cell proliferation involved in sprouting angiogenesis	biological_process	10	Thbs1	1	256	4	17887	0.0560356
GO:0060760	positive regulation of response to cytokine stimulus	biological_process	7	Wnt5a	1	256	4	17887	0.0560356
GO:0014047	glutamate secretion	biological_process	11	Ntrk2	1	256	4	17887	0.0560356
GO:0008366	axon ensheathment	biological_process	5	Cldn11	1	256	4	17887	0.0560356
GO:0046923	ER retention sequence binding	molecular_function	7	Cemip	1	256	4	17887	0.0560356
GO:0098992	neuronal dense core vesicle	cellular_component	10	Scg2	1	256	4	17887	0.0560356
GO:0072221	metanephric distal convoluted tubule development	biological_process	9	Pax8	1	256	4	17887	0.0560356
GO:0086006	voltage-gated sodium channel activity involved in cardiac muscle cell action potential	molecular_function	10	Scn3b	1	256	4	17887	0.0560356
GO:0070995	NADPH oxidation	biological_process	5	Fmo2	1	256	4	17887	0.0560356
GO:1904447	folate import across plasma membrane	biological_process	8	Folr2	1	256	4	17887	0.0560356
GO:0060512	prostate gland morphogenesis	biological_process	5	Serpinb5	1	256	4	17887	0.0560356
GO:1903038	negative regulation of leukocyte cell-cell adhesion	biological_process	8	Adtrp	1	256	4	17887	0.0560356
GO:0051454	intracellular pH elevation	biological_process	12	Cftr	1	256	4	17887	0.0560356
GO:0002125	maternal aggressive behavior	biological_process	6	Avpr1a	1	256	4	17887	0.0560356
GO:0031749	D2 dopamine receptor binding	molecular_function	8	Ppp1r1b	1	256	4	17887	0.0560356
GO:0004185	serine-type carboxypeptidase activity	molecular_function	9	Cpvl	1	256	4	17887	0.0560356
GO:0042167	heme catabolic process	biological_process	9	Hmox1	1	256	4	17887	0.0560356
GO:0015705	iodide transport	biological_process	9	Slc26a4	1	256	4	17887	0.0560356
GO:0020027	hemoglobin metabolic process	biological_process	7	Hpx	1	256	4	17887	0.0560356
GO:0006525	arginine metabolic process	biological_process	11	Arg1	1	256	4	17887	0.0560356
GO:2000402	negative regulation of lymphocyte migration	biological_process	8	Adtrp	1	256	4	17887	0.0560356
GO:0006081	cellular aldehyde metabolic process	biological_process	5	Aldh3a1	1	256	4	17887	0.0560356
GO:0010046	response to mycotoxin	biological_process	6	Lcn2	1	256	4	17887	0.0560356
GO:0098712	L-glutamate import across plasma membrane	biological_process	7	Slc7a11	1	256	4	17887	0.0560356
GO:0051380	norepinephrine binding	molecular_function	6	Adrb3	1	256	4	17887	0.0560356
GO:0031547	brain-derived neurotrophic factor receptor signaling pathway	biological_process	8	Ntrk2	1	256	4	17887	0.0560356
GO:1902514	regulation of calcium ion transmembrane transport via high voltage-gated calcium channel	biological_process	11	Nppa	1	256	4	17887	0.0560356
GO:0014878	response to electrical stimulus involved in regulation of muscle adaptation	biological_process	5	Ppargc1a	1	256	4	17887	0.0560356
GO:1903595	positive regulation of histamine secretion by mast cell	biological_process	9	Nppa	1	256	4	17887	0.0560356
GO:0006032	chitin catabolic process	biological_process	8	Chia	1	256	4	17887	0.0560356
GO:0050851	antigen receptor-mediated signaling pathway	biological_process	7	Lax1	1	256	4	17887	0.0560356
GO:0035672	oligopeptide transmembrane transport	biological_process	10	Slc15a2	1	256	4	17887	0.0560356
GO:0036302	atrioventricular canal development	biological_process	5	Has2	1	256	4	17887	0.0560356
GO:0072050	S-shaped body morphogenesis	biological_process	5	Pax8	1	256	4	17887	0.0560356
GO:0072218	metanephric ascending thin limb development	biological_process	9	Pou3f3	1	256	4	17887	0.0560356
GO:0072289	metanephric nephron tubule formation	biological_process	9	Pax8	1	256	4	17887	0.0560356
GO:0032849	positive regulation of cellular pH reduction	biological_process	7	Avpr1a	1	256	4	17887	0.0560356
GO:0032400	melanosome localization	biological_process	8	Mreg	1	256	4	17887	0.0560356
GO:0046870	cadmium ion binding	molecular_function	8	Mt2A	1	256	4	17887	0.0560356
GO:0150076	neuroinflammatory response	biological_process	7	Adcy1	1	256	4	17887	0.0560356
GO:0060907	positive regulation of macrophage cytokine production	biological_process	9	Wnt5a	1	256	4	17887	0.0560356
GO:0060686	negative regulation of prostatic bud formation	biological_process	9	Wnt5a	1	256	4	17887	0.0560356
GO:0023024	MHC class I protein complex binding	molecular_function	6	Klrd1	1	256	4	17887	0.0560356
GO:0010754	negative regulation of cGMP-mediated signaling	biological_process	10	Thbs1	1	256	4	17887	0.0560356
GO:0072144	glomerular mesangial cell development	biological_process	7	Acta2	1	256	4	17887	0.0560356
GO:0098735	positive regulation of the force of heart contraction	biological_process	10	Ryr2	1	256	4	17887	0.0560356
GO:0071284	cellular response to lead ion	biological_process	8	Cldn1	1	256	4	17887	0.0560356
GO:2000324	positive regulation of glucocorticoid receptor signaling pathway	biological_process	10	Ntrk2	1	256	4	17887	0.0560356
GO:0051138	positive regulation of NK T cell differentiation	biological_process	12	Zbtb16	1	256	4	17887	0.0560356
GO:1902305	regulation of sodium ion transmembrane transport	biological_process	10	Bpifa1	1	256	4	17887	0.0560356
GO:0043503	skeletal muscle fiber adaptation	biological_process	5	Acta1	1	256	4	17887	0.0560356
GO:1903416	response to glycoside	biological_process	6	Atp1a2	1	256	4	17887	0.0560356
GO:0050501	hyaluronan synthase activity	molecular_function	7	Has2	1	256	4	17887	0.0560356
GO:0002925	positive regulation of humoral immune response mediated by circulating immunoglobulin	biological_process	12	Hpx	1	256	4	17887	0.0560356
GO:0060708	spongiotrophoblast differentiation	biological_process	6	Lif	1	256	4	17887	0.0560356
GO:0046882	negative regulation of follicle-stimulating hormone secretion	biological_process	10	Fst	1	256	4	17887	0.0560356
GO:0010748	negative regulation of long-chain fatty acid import across plasma membrane	biological_process	11	Thbs1	1	256	4	17887	0.0560356
GO:0086015	SA node cell action potential	biological_process	8	Scn3b	1	256	4	17887	0.0560356
GO:0038165	oncostatin-M-mediated signaling pathway	biological_process	7	Osmr	1	256	4	17887	0.0560356
GO:0004568	chitinase activity	molecular_function	7	Chia	1	256	4	17887	0.0560356
GO:0051707	response to other organism	biological_process	6	Krt8	1	256	4	17887	0.0560356
GO:0045415	negative regulation of interleukin-8 biosynthetic process	biological_process	9	Bcl3	1	256	4	17887	0.0560356
GO:0048763	calcium-induced calcium release activity	molecular_function	10	Ryr2	1	256	4	17887	0.0560356
GO:0038064	collagen receptor activity	molecular_function	6	Itga11	1	256	4	17887	0.0560356
GO:0008595	anterior/posterior axis specification, embryo	biological_process	7	Wnt5a	1	256	4	17887	0.0560356
GO:0072207	metanephric epithelium development	biological_process	8	Pax8	1	256	4	17887	0.0560356
GO:0061629	RNA polymerase II-specific DNA-binding transcription factor binding	molecular_function	7	Ankrd1	1	256	4	17887	0.0560356
GO:0034186	apolipoprotein A-I binding	molecular_function	6	Trem2	1	256	4	17887	0.0560356
GO:0046546	development of primary male sexual characteristics	biological_process	6	Wnt5a	1	256	4	17887	0.0560356
GO:0060351	cartilage development involved in endochondral bone morphogenesis	biological_process	7	Col1a1	1	256	4	17887	0.0560356
GO:1990239	steroid hormone binding	molecular_function	6	Atp1a2	1	256	4	17887	0.0560356
GO:0003332	negative regulation of extracellular matrix constituent secretion	biological_process	9	Adtrp	1	256	4	17887	0.0560356
GO:0021889	olfactory bulb interneuron differentiation	biological_process	9	Erbb4	1	256	4	17887	0.0560356
GO:0061041	regulation of wound healing	biological_process	8	Tnfrsf12a	1	256	4	17887	0.0560356
GO:0097224	sperm connecting piece	cellular_component	5	Pmfbp1	1	256	4	17887	0.0560356
GO:0035434	copper ion transmembrane transport	biological_process	11	Atp7b	1	256	4	17887	0.0560356
GO:0042758	long-chain fatty acid catabolic process	biological_process	11	Adtrp	1	256	4	17887	0.0560356
GO:0014051	gamma-aminobutyric acid secretion	biological_process	8	Trpc4	1	256	4	17887	0.0560356
GO:0002385	mucosal immune response	biological_process	6	Ffar3	1	256	4	17887	0.0560356
GO:0071219	cellular response to molecule of bacterial origin	biological_process	7	Wnt5a	1	256	4	17887	0.0560356
GO:2000660	negative regulation of interleukin-1-mediated signaling pathway	biological_process	10	Il6	1	256	4	17887	0.0560356
GO:0048861	leukemia inhibitory factor signaling pathway	biological_process	7	Lif	1	256	4	17887	0.0560356
GO:0016742	hydroxymethyl-, formyl- and related transferase activity	molecular_function	6	Aldh1l2	1	256	4	17887	0.0560356
GO:1904036	negative regulation of epithelial cell apoptotic process	biological_process	10	Hmox1	1	256	4	17887	0.0560356
GO:0072012	glomerulus vasculature development	biological_process	6	Angpt2	1	256	4	17887	0.0560356
GO:0090382	phagosome maturation	biological_process	6	Mreg	1	256	4	17887	0.0560356
GO:0014015	positive regulation of gliogenesis	biological_process	10	Il6	1	256	4	17887	0.0560356
GO:0009609	response to symbiotic bacterium	biological_process	8	C4bpa	1	256	4	17887	0.0560356
GO:0015677	copper ion import	biological_process	11	Atp7b	1	256	4	17887	0.0560356
GO:0060664	epithelial cell proliferation involved in salivary gland morphogenesis	biological_process	5	Il6	1	256	4	17887	0.0560356
GO:0090131	mesenchyme migration	biological_process	5	Acta1	1	256	4	17887	0.0560356
GO:0071156	regulation of cell cycle arrest	biological_process	8	Slc25a33	1	256	4	17887	0.0560356
GO:0005375	copper ion transmembrane transporter activity	molecular_function	10	Atp7b	1	256	4	17887	0.0560356
GO:0060073	micturition	biological_process	6	LOC103694905	1	256	4	17887	0.0560356
GO:0031427	response to methotrexate	biological_process	6	Dhfr	1	256	4	17887	0.0560356
GO:0007254	JNK cascade	biological_process	13	Ror2;Wnt5a	2	256	27	17887	0.0566513
GO:0045777	positive regulation of blood pressure	biological_process	6	Avpr1a;Olr59	2	256	27	17887	0.0566513
GO:0001725	stress fiber	cellular_component	7	Myh7;Acta1;Fam107a	3	256	61	17887	0.056885
GO:0070062	extracellular exosome	cellular_component	7	Slc2a4;Serpine1;Slc26a4	3	256	61	17887	0.056885
GO:0006911	phagocytosis, engulfment	biological_process	8	Gsn;AABR07065814;Marco	3	256	62	17887	0.0591698
GO:0008202	steroid metabolic process	biological_process	6	Akr1c19;Cyp2e1;Hmgcs2	3	256	62	17887	0.0591698
GO:0051781	positive regulation of cell division	biological_process	7	Pgf;Ereg	2	256	28	17887	0.0604485
GO:0045776	negative regulation of blood pressure	biological_process	6	Gch1;Ffar3	2	256	28	17887	0.0604485
GO:0004222	metalloendopeptidase activity	molecular_function	8	Adamts12;Adamts4;Ecel1;Mmp2	4	256	103	17887	0.0605539
GO:0060070	canonical Wnt signaling pathway	biological_process	8	Wnt5a;Frzb;Gli1	3	256	63	17887	0.0614973
GO:0070301	cellular response to hydrogen peroxide	biological_process	8	Lcn2;Il6;Arg1	3	256	64	17887	0.0638669
GO:0007005	mitochondrion organization	biological_process	6	Sod2;Slc25a33;Ppargc1a	3	256	64	17887	0.0638669
GO:0007173	epidermal growth factor receptor signaling pathway	biological_process	9	Ereg;Areg	2	256	29	17887	0.0643304
GO:0000978	RNA polymerase II proximal promoter sequence-specific DNA binding	molecular_function	10	Tef;Aknad1;Etv4;Heyl;Klf15;Nkx2-8;Gli1;St18;Foxs1;Pax8	10	256	404	17887	0.0660786
GO:0007409	axonogenesis	biological_process	9	Wnt5a;Nkx2-8;Adcy1	3	256	65	17887	0.0662783
GO:0005215	transporter activity	molecular_function	3	Slc2a4;Slco1a1;Slc15a2	3	256	65	17887	0.0662783
GO:0006821	chloride transport	biological_process	9	Cftr;Slc4a1;Clca1	3	256	65	17887	0.0662783
GO:0055114	oxidation-reduction process	biological_process	4	Akr1c19;Fmo2;Aldh1l2;Cdo1;Hmox1;LOC100365958;Aldh3a1;Dhfr;Fmo3;Adhfe1;Fmo6;Aox3;Vat1l;Sod2;Cyp2e1	15	256	683	17887	0.0669735
GO:0090090	negative regulation of canonical Wnt signaling pathway	biological_process	10	Ror2;Frzb;Wnt5a;Gli1	4	256	107	17887	0.0676995
GO:0007157	heterophilic cell-cell adhesion via plasma membrane cell adhesion molecules	biological_process	7	Selp;Sele	2	256	30	17887	0.0682937
GO:0046686	response to cadmium ion	biological_process	7	Arg1;Sod2	2	256	30	17887	0.0682937
GO:0001837	epithelial to mesenchymal transition	biological_process	7	Aknad1;Wnt5a	2	256	30	17887	0.0682937
GO:0043507	positive regulation of JUN kinase activity	biological_process	13	Ror2;Wnt5a	2	256	30	17887	0.0682937
GO:0019722	calcium-mediated signaling	biological_process	7	Cxcr1;Avpr1a;Ryr2	3	256	66	17887	0.0687309
GO:0033138	positive regulation of peptidyl-serine phosphorylation	biological_process	11	Lif;Wnt5a;Ntrk2	3	256	66	17887	0.0687309
GO:1990646	cellular response to prolactin	biological_process	8	Il6	1	256	5	17887	0.0695487
GO:0030049	muscle filament sliding	biological_process	8	Myh7	1	256	5	17887	0.0695487
GO:0000904	cell morphogenesis involved in differentiation	biological_process	7	Lamc3	1	256	5	17887	0.0695487
GO:0004452	isopentenyl-diphosphate delta-isomerase activity	molecular_function	7	Idi1	1	256	5	17887	0.0695487
GO:0070245	positive regulation of thymocyte apoptotic process	biological_process	13	Wnt5a	1	256	5	17887	0.0695487
GO:0048570	notochord morphogenesis	biological_process	7	Wnt5a	1	256	5	17887	0.0695487
GO:0002686	negative regulation of leukocyte migration	biological_process	7	Adtrp	1	256	5	17887	0.0695487
GO:1904938	planar cell polarity pathway involved in axon guidance	biological_process	10	Wnt5a	1	256	5	17887	0.0695487
GO:1904637	cellular response to ionomycin	biological_process	8	Ppargc1a	1	256	5	17887	0.0695487
GO:0070051	fibrinogen binding	molecular_function	5	Thbs1	1	256	5	17887	0.0695487
GO:0072284	metanephric S-shaped body morphogenesis	biological_process	6	Pax8	1	256	5	17887	0.0695487
GO:0014731	spectrin-associated cytoskeleton	cellular_component	7	Sptb	1	256	5	17887	0.0695487
GO:0004630	phospholipase D activity	molecular_function	8	Hmox1	1	256	5	17887	0.0695487
GO:1903348	positive regulation of bicellular tight junction assembly	biological_process	8	Cldn1	1	256	5	17887	0.0695487
GO:0060372	regulation of atrial cardiac muscle cell membrane repolarization	biological_process	11	Nppa	1	256	5	17887	0.0695487
GO:0004309	exopolyphosphatase activity	molecular_function	8	Prune2	1	256	5	17887	0.0695487
GO:0045836	positive regulation of meiotic nuclear division	biological_process	9	Wnt5a	1	256	5	17887	0.0695487
GO:2000052	positive regulation of non-canonical Wnt signaling pathway	biological_process	10	Wnt5a	1	256	5	17887	0.0695487
GO:0071813	lipoprotein particle binding	molecular_function	6	Trem2	1	256	5	17887	0.0695487
GO:0060754	positive regulation of mast cell chemotaxis	biological_process	9	Pgf	1	256	5	17887	0.0695487
GO:0036006	cellular response to macrophage colony-stimulating factor stimulus	biological_process	8	Ccl2	1	256	5	17887	0.0695487
GO:1901388	regulation of transforming growth factor beta activation	biological_process	8	Itgb8	1	256	5	17887	0.0695487
GO:0060762	regulation of branching involved in mammary gland duct morphogenesis	biological_process	8	Wnt5a	1	256	5	17887	0.0695487
GO:1903426	regulation of reactive oxygen species biosynthetic process	biological_process	7	Slc25a33	1	256	5	17887	0.0695487
GO:0042541	hemoglobin biosynthetic process	biological_process	8	Inhba	1	256	5	17887	0.0695487
GO:0016338	calcium-independent cell-cell adhesion via plasma membrane cell-adhesion molecules	biological_process	7	Cldn1	1	256	5	17887	0.0695487
GO:0060205	cytoplasmic vesicle lumen	cellular_component	6	Lcn2	1	256	5	17887	0.0695487
GO:0004994	somatostatin receptor activity	molecular_function	8	Sstr1	1	256	5	17887	0.0695487
GO:0035425	autocrine signaling	biological_process	6	S100a8	1	256	5	17887	0.0695487
GO:0019222	regulation of metabolic process	biological_process	5	Ntrk2	1	256	5	17887	0.0695487
GO:0051798	positive regulation of hair follicle development	biological_process	8	Fst	1	256	5	17887	0.0695487
GO:0022626	cytosolic ribosome	cellular_component	7	Ppargc1a	1	256	5	17887	0.0695487
GO:0001537	N-acetylgalactosamine 4-O-sulfotransferase activity	molecular_function	7	Chst13	1	256	5	17887	0.0695487
GO:0043201	response to leucine	biological_process	7	Ppargc1a	1	256	5	17887	0.0695487
GO:0086012	membrane depolarization during cardiac muscle cell action potential	biological_process	8	Scn3b	1	256	5	17887	0.0695487
GO:0097187	dentinogenesis	biological_process	8	Serpine1	1	256	5	17887	0.0695487
GO:0030151	molybdenum ion binding	molecular_function	8	Aox3	1	256	5	17887	0.0695487
GO:0071702	organic substance transport	biological_process	6	Slc7a11	1	256	5	17887	0.0695487
GO:1901841	regulation of high voltage-gated calcium channel activity	biological_process	10	Nppa	1	256	5	17887	0.0695487
GO:0005528	FK506 binding	molecular_function	6	Fkbp5	1	256	5	17887	0.0695487
GO:0030213	hyaluronan biosynthetic process	biological_process	9	Has2	1	256	5	17887	0.0695487
GO:0006857	oligopeptide transport	biological_process	9	Slc15a2	1	256	5	17887	0.0695487
GO:0051101	regulation of DNA binding	biological_process	6	Bcl3	1	256	5	17887	0.0695487
GO:0019871	sodium channel inhibitor activity	molecular_function	7	Scn3b	1	256	5	17887	0.0695487
GO:0034711	inhibin binding	molecular_function	5	Inhba	1	256	5	17887	0.0695487
GO:0048515	spermatid differentiation	biological_process	5	Tmem119	1	256	5	17887	0.0695487
GO:0043305	negative regulation of mast cell degranulation	biological_process	10	Hmox1	1	256	5	17887	0.0695487
GO:0060336	negative regulation of interferon-gamma-mediated signaling pathway	biological_process	10	Arg1	1	256	5	17887	0.0695487
GO:0140052	cellular response to oxidised low-density lipoprotein particle stimulus	biological_process	6	Adtrp	1	256	5	17887	0.0695487
GO:0060373	regulation of ventricular cardiac muscle cell membrane depolarization	biological_process	7	Scn3b	1	256	5	17887	0.0695487
GO:1900407	regulation of cellular response to oxidative stress	biological_process	7	Slc7a11	1	256	5	17887	0.0695487
GO:0048793	pronephros development	biological_process	7	Pax8	1	256	5	17887	0.0695487
GO:0004022	alcohol dehydrogenase (NAD) activity	molecular_function	7	Adhfe1	1	256	5	17887	0.0695487
GO:0038170	somatostatin signaling pathway	biological_process	6	Sstr1	1	256	5	17887	0.0695487
GO:0038065	collagen-activated signaling pathway	biological_process	6	Itga11	1	256	5	17887	0.0695487
GO:0002729	positive regulation of natural killer cell cytokine production	biological_process	11	Clnk	1	256	5	17887	0.0695487
GO:0003873	6-phosphofructo-2-kinase activity	molecular_function	8	Pfkfb1	1	256	5	17887	0.0695487
GO:0060028	convergent extension involved in axis elongation	biological_process	8	Wnt5a	1	256	5	17887	0.0695487
GO:0048403	brain-derived neurotrophic factor binding	molecular_function	7	Ntrk2	1	256	5	17887	0.0695487
GO:0050913	sensory perception of bitter taste	biological_process	9	Gnat3	1	256	5	17887	0.0695487
GO:0005172	vascular endothelial growth factor receptor binding	molecular_function	7	Pgf	1	256	5	17887	0.0695487
GO:0004331	fructose-2,6-bisphosphate 2-phosphatase activity	molecular_function	10	Pfkfb1	1	256	5	17887	0.0695487
GO:0072719	cellular response to cisplatin	biological_process	7	Hmox1	1	256	5	17887	0.0695487
GO:0000303	response to superoxide	biological_process	8	Sod2	1	256	5	17887	0.0695487
GO:2000757	negative regulation of peptidyl-lysine acetylation	biological_process	11	Klf15	1	256	5	17887	0.0695487
GO:0042806	fucose binding	molecular_function	6	Selp	1	256	5	17887	0.0695487
GO:0042509	regulation of tyrosine phosphorylation of STAT protein	biological_process	10	Il22ra2	1	256	5	17887	0.0695487
GO:0051427	hormone receptor binding	molecular_function	6	Nppa	1	256	5	17887	0.0695487
GO:0042490	mechanoreceptor differentiation	biological_process	7	Ntrk2	1	256	5	17887	0.0695487
GO:0009299	mRNA transcription	biological_process	9	Ereg	1	256	5	17887	0.0695487
GO:0004784	superoxide dismutase activity	molecular_function	4	Sod2	1	256	5	17887	0.0695487
GO:0006798	polyphosphate catabolic process	biological_process	7	Prune2	1	256	5	17887	0.0695487
GO:0051971	positive regulation of transmission of nerve impulse	biological_process	8	Il6	1	256	5	17887	0.0695487
GO:0034103	regulation of tissue remodeling	biological_process	6	Gpnmb	1	256	5	17887	0.0695487
GO:0030323	respiratory tube development	biological_process	6	Nkx2-8	1	256	5	17887	0.0695487
GO:0032815	negative regulation of natural killer cell activation	biological_process	9	Clnk	1	256	5	17887	0.0695487
GO:0019815	B cell receptor complex	cellular_component	5	Cd79a	1	256	5	17887	0.0695487
GO:0098639	collagen binding involved in cell-matrix adhesion	molecular_function	6	Itga11	1	256	5	17887	0.0695487
GO:0072540	T-helper 17 cell lineage commitment	biological_process	10	Il6	1	256	5	17887	0.0695487
GO:0015232	heme transporter activity	molecular_function	6	Hpx	1	256	5	17887	0.0695487
GO:0043237	laminin-1 binding	molecular_function	6	Nid1	1	256	5	17887	0.0695487
GO:0032783	ELL-EAF complex	cellular_component	5	Aff3	1	256	5	17887	0.0695487
GO:0005579	membrane attack complex	cellular_component	6	C9	1	256	5	17887	0.0695487
GO:0050909	sensory perception of taste	biological_process	8	Trpm5;Gnat3	2	256	31	17887	0.0723354
GO:0007281	germ cell development	biological_process	5	Bmp8b;Angpt2	2	256	31	17887	0.0723354
GO:0048662	negative regulation of smooth muscle cell proliferation	biological_process	8	Ppargc1a;Hmox1	2	256	31	17887	0.0723354
GO:0007188	adenylate cyclase-modulating G protein-coupled receptor signaling pathway	biological_process	7	Gnat3;Adrb3	2	256	31	17887	0.0723354
GO:1902476	chloride transmembrane transport	biological_process	10	Slc26a4;Cftr;Slc4a1	3	256	68	17887	0.0737579
GO:0017046	peptide hormone binding	molecular_function	6	Inhba;Avpr1a	2	256	32	17887	0.0764523
GO:0030282	bone mineralization	biological_process	7	Ror2;Gpnmb	2	256	32	17887	0.0764523
GO:0048706	embryonic skeletal system development	biological_process	7	Wnt5a;Col1a1	2	256	32	17887	0.0764523
GO:0043473	pigmentation	biological_process	3	Krt76;Mreg	2	256	32	17887	0.0764523
GO:0017147	Wnt-protein binding	molecular_function	5	Frzb;Ror2	2	256	32	17887	0.0764523
GO:0098794	postsynapse	cellular_component	4	Ppp1r1b;Ntrk2;Add2;Wnt5a	4	256	112	17887	0.0772162
GO:0006979	response to oxidative stress	biological_process	5	Hmox1;Lcn2;Slc7a11;Sod2	4	256	112	17887	0.0772162
GO:0048678	response to axon injury	biological_process	6	Sod2;Arg1	2	256	33	17887	0.0806417
GO:0007566	embryo implantation	biological_process	4	Lif;Mmp2	2	256	33	17887	0.0806417
GO:0006003	fructose 2,6-bisphosphate metabolic process	biological_process	7	Pfkfb1	1	256	6	17887	0.0828691
GO:1990000	amyloid fibril formation	biological_process	7	Gsn	1	256	6	17887	0.0828691
GO:1903779	regulation of cardiac conduction	biological_process	9	Tnni3k	1	256	6	17887	0.0828691
GO:0060426	lung vasculature development	biological_process	7	Lif	1	256	6	17887	0.0828691
GO:0050917	sensory perception of umami taste	biological_process	9	Gnat3	1	256	6	17887	0.0828691
GO:0000050	urea cycle	biological_process	8	Arg1	1	256	6	17887	0.0828691
GO:0014061	regulation of norepinephrine secretion	biological_process	9	Ffar3	1	256	6	17887	0.0828691
GO:0015886	heme transport	biological_process	7	Hpx	1	256	6	17887	0.0828691
GO:0072112	glomerular visceral epithelial cell differentiation	biological_process	7	Klf15	1	256	6	17887	0.0828691
GO:0035811	negative regulation of urine volume	biological_process	7	Slc4a1	1	256	6	17887	0.0828691
GO:0002693	positive regulation of cellular extravasation	biological_process	8	Ccl2	1	256	6	17887	0.0828691
GO:0071871	response to epinephrine	biological_process	8	Ppargc1a	1	256	6	17887	0.0828691
GO:0008290	F-actin capping protein complex	cellular_component	4	Add2	1	256	6	17887	0.0828691
GO:0008091	spectrin	cellular_component	6	Sptb	1	256	6	17887	0.0828691
GO:0090037	positive regulation of protein kinase C signaling	biological_process	10	Wnt5a	1	256	6	17887	0.0828691
GO:0060706	cell differentiation involved in embryonic placenta development	biological_process	5	Krt8	1	256	6	17887	0.0828691
GO:0014033	neural crest cell differentiation	biological_process	7	Frzb	1	256	6	17887	0.0828691
GO:0008556	ATPase-coupled potassium transmembrane transporter activity	molecular_function	10	Atp1a2	1	256	6	17887	0.0828691
GO:0010656	negative regulation of muscle cell apoptotic process	biological_process	10	Hmox1	1	256	6	17887	0.0828691
GO:0007210	serotonin receptor signaling pathway	biological_process	5	LOC103694905	1	256	6	17887	0.0828691
GO:0032050	clathrin heavy chain binding	molecular_function	6	Cemip	1	256	6	17887	0.0828691
GO:0071864	positive regulation of cell proliferation in bone marrow	biological_process	8	Il6	1	256	6	17887	0.0828691
GO:0086014	atrial cardiac muscle cell action potential	biological_process	9	Scn3b	1	256	6	17887	0.0828691
GO:0035524	proline transmembrane transport	biological_process	12	Slc6a7	1	256	6	17887	0.0828691
GO:0007260	tyrosine phosphorylation of STAT protein	biological_process	11	Lif	1	256	6	17887	0.0828691
GO:0035368	selenocysteine insertion sequence binding	molecular_function	8	LOC100362027	1	256	6	17887	0.0828691
GO:1901857	positive regulation of cellular respiration	biological_process	8	Ppargc1a	1	256	6	17887	0.0828691
GO:1900121	negative regulation of receptor binding	biological_process	8	Crtac1	1	256	6	17887	0.0828691
GO:0071599	otic vesicle development	biological_process	7	Pax8	1	256	6	17887	0.0828691
GO:0051379	epinephrine binding	molecular_function	6	Adrb3	1	256	6	17887	0.0828691
GO:0005577	fibrinogen complex	cellular_component	4	Thbs1	1	256	6	17887	0.0828691
GO:0033629	negative regulation of cell adhesion mediated by integrin	biological_process	7	Serpine1	1	256	6	17887	0.0828691
GO:0071417	cellular response to organonitrogen compound	biological_process	7	Acta1	1	256	6	17887	0.0828691
GO:2000049	positive regulation of cell-cell adhesion mediated by cadherin	biological_process	8	Wnt5a	1	256	6	17887	0.0828691
GO:0002639	positive regulation of immunoglobulin production	biological_process	9	Hpx	1	256	6	17887	0.0828691
GO:0060463	lung lobe morphogenesis	biological_process	5	Lif	1	256	6	17887	0.0828691
GO:0005138	interleukin-6 receptor binding	molecular_function	7	Il6	1	256	6	17887	0.0828691
GO:0019800	peptide cross-linking via chondroitin 4-sulfate glycosaminoglycan	biological_process	10	Egflam	1	256	6	17887	0.0828691
GO:0031394	positive regulation of prostaglandin biosynthetic process	biological_process	12	Avpr1a	1	256	6	17887	0.0828691
GO:0031670	cellular response to nutrient	biological_process	8	Hmox1	1	256	6	17887	0.0828691
GO:0050916	sensory perception of sweet taste	biological_process	9	Gnat3	1	256	6	17887	0.0828691
GO:0072201	negative regulation of mesenchymal cell proliferation	biological_process	8	Wnt5a	1	256	6	17887	0.0828691
GO:0033591	response to L-ascorbic acid	biological_process	6	Sod2	1	256	6	17887	0.0828691
GO:1990405	protein antigen binding	molecular_function	5	Klrd1	1	256	6	17887	0.0828691
GO:1901164	negative regulation of trophoblast cell migration	biological_process	9	Timp1	1	256	6	17887	0.0828691
GO:0060335	positive regulation of interferon-gamma-mediated signaling pathway	biological_process	10	Hpx	1	256	6	17887	0.0828691
GO:0001665	alpha-N-acetylgalactosaminide alpha-2,6-sialyltransferase activity	molecular_function	7	St6galnac1	1	256	6	17887	0.0828691
GO:0035252	UDP-xylosyltransferase activity	molecular_function	7	Gxylt2	1	256	6	17887	0.0828691
GO:0044691	tooth eruption	biological_process	5	Col1a1	1	256	6	17887	0.0828691
GO:2000651	positive regulation of sodium ion transmembrane transporter activity	biological_process	8	Wnk2	1	256	6	17887	0.0828691
GO:0035773	insulin secretion involved in cellular response to glucose stimulus	biological_process	12	Ptprn	1	256	6	17887	0.0828691
GO:0071636	positive regulation of transforming growth factor beta production	biological_process	8	Thbs1	1	256	6	17887	0.0828691
GO:0009913	epidermal cell differentiation	biological_process	7	Gli1	1	256	6	17887	0.0828691
GO:0051127	positive regulation of actin nucleation	biological_process	10	Gsn	1	256	6	17887	0.0828691
GO:0008035	high-density lipoprotein particle binding	molecular_function	7	Trem2	1	256	6	17887	0.0828691
GO:0046655	folic acid metabolic process	biological_process	7	Dhfr	1	256	6	17887	0.0828691
GO:0007215	glutamate receptor signaling pathway	biological_process	6	Sstr1	1	256	6	17887	0.0828691
GO:0048806	genitalia development	biological_process	6	Wnt5a	1	256	6	17887	0.0828691
GO:0045630	positive regulation of T-helper 2 cell differentiation	biological_process	9	Il6	1	256	6	17887	0.0828691
GO:0010193	response to ozone	biological_process	7	Cyp2e1	1	256	6	17887	0.0828691
GO:0005542	folic acid binding	molecular_function	5	Folr2	1	256	6	17887	0.0828691
GO:0060056	mammary gland involution	biological_process	5	Arg1	1	256	6	17887	0.0828691
GO:2000404	regulation of T cell migration	biological_process	8	LOC290595	1	256	6	17887	0.0828691
GO:0061669	spontaneous neurotransmitter secretion	biological_process	7	Doc2b	1	256	6	17887	0.0828691
GO:0014031	mesenchymal cell development	biological_process	6	Heyl	1	256	6	17887	0.0828691
GO:0060054	positive regulation of epithelial cell proliferation involved in wound healing	biological_process	9	Cldn1	1	256	6	17887	0.0828691
GO:0043619	regulation of transcription from RNA polymerase II promoter in response to oxidative stress	biological_process	11	Hmox1	1	256	6	17887	0.0828691
GO:0010273	detoxification of copper ion	biological_process	5	Mt2A	1	256	6	17887	0.0828691
GO:0033133	positive regulation of glucokinase activity	biological_process	11	Pfkfb1	1	256	6	17887	0.0828691
GO:0015193	L-proline transmembrane transporter activity	molecular_function	7	Slc6a7	1	256	6	17887	0.0828691
GO:0031346	positive regulation of cell projection organization	biological_process	8	Lcn2	1	256	6	17887	0.0828691
GO:0046323	glucose import	biological_process	12	Slc2a4	1	256	6	17887	0.0828691
GO:1903589	positive regulation of blood vessel endothelial cell proliferation involved in sprouting angiogenesis	biological_process	10	Hmox1	1	256	6	17887	0.0828691
GO:0014808	release of sequestered calcium ion into cytosol by sarcoplasmic reticulum	biological_process	12	Ryr2	1	256	6	17887	0.0828691
GO:0014012	peripheral nervous system axon regeneration	biological_process	8	Tnc	1	256	6	17887	0.0828691
GO:0050731	positive regulation of peptidyl-tyrosine phosphorylation	biological_process	11	Areg;Trem2;Lif	3	256	72	17887	0.084284
GO:0009749	response to glucose	biological_process	9	Ptprn;Angpt2;Thbs1	3	256	72	17887	0.084284
GO:0031901	early endosome membrane	cellular_component	9	Olr59;Ntrk2;Gpnmb	3	256	72	17887	0.084284
GO:0034504	protein localization to nucleus	biological_process	8	Col1a1;Zbtb16	2	256	34	17887	0.0849004
GO:0005109	frizzled binding	molecular_function	7	Wnt5a;Ror2	2	256	34	17887	0.0849004
GO:0071773	cellular response to BMP stimulus	biological_process	8	Heyl;Adamts12	2	256	34	17887	0.0849004
GO:0048709	oligodendrocyte differentiation	biological_process	7	Ntrk2;Trpc4	2	256	34	17887	0.0849004
GO:0007565	female pregnancy	biological_process	5	Nppa;Pgf;Arg1	3	256	73	17887	0.0870108
GO:0007416	synapse assembly	biological_process	6	Erbb4;Add2	2	256	35	17887	0.0892259
GO:0007017	microtubule-based process	biological_process	4	Tuba8;Tubb6	2	256	35	17887	0.0892259
GO:0030315	T-tubule	cellular_component	5	Atp1a2;Slc2a4	2	256	35	17887	0.0892259
GO:0007616	long-term memory	biological_process	6	Adcy1;Ntrk2	2	256	35	17887	0.0892259
GO:0005160	transforming growth factor beta receptor binding	molecular_function	7	Bmp8b;Inhba	2	256	35	17887	0.0892259
GO:0010951	negative regulation of endopeptidase activity	biological_process	11	Tfpi2;Serpine1;Timp1;Serpinb5	4	256	118	17887	0.0894697
GO:0043235	receptor complex	cellular_component	4	Klrd1;Adrb3;Ntrk2;Erbb4;Ror2	5	256	167	17887	0.0922378
GO:0010811	positive regulation of cell-substrate adhesion	biological_process	7	Egflam;Nid1	2	256	36	17887	0.0936151
GO:0030199	collagen fibril organization	biological_process	7	Col3a1;Col1a1	2	256	36	17887	0.0936151
GO:0016620	oxidoreductase activity, acting on the aldehyde or oxo group of donors, NAD or NADP as acceptor	molecular_function	6	Aldh1l2;Aldh3a1	2	256	36	17887	0.0936151
GO:0048705	skeletal system morphogenesis	biological_process	6	Mmp2;Col1a1	2	256	36	17887	0.0936151
GO:0050714	positive regulation of protein secretion	biological_process	10	Ankrd1;Trem2	2	256	36	17887	0.0936151
GO:1990430	extracellular matrix protein binding	molecular_function	5	Itgb8	1	256	7	17887	0.0959995
GO:0050700	CARD domain binding	molecular_function	6	Card14	1	256	7	17887	0.0959995
GO:0016266	O-glycan processing	biological_process	11	Gxylt2	1	256	7	17887	0.0959995
GO:0045760	positive regulation of action potential	biological_process	6	Ffar3	1	256	7	17887	0.0959995
GO:0030214	hyaluronan catabolic process	biological_process	9	Cemip	1	256	7	17887	0.0959995
GO:0001504	neurotransmitter uptake	biological_process	6	Atp1a2	1	256	7	17887	0.0959995
GO:0045835	negative regulation of meiotic nuclear division	biological_process	9	Lif	1	256	7	17887	0.0959995
GO:0045159	myosin II binding	molecular_function	7	Gsn	1	256	7	17887	0.0959995
GO:0010766	negative regulation of sodium ion transport	biological_process	10	Wnk2	1	256	7	17887	0.0959995
GO:0042743	hydrogen peroxide metabolic process	biological_process	7	Sod2	1	256	7	17887	0.0959995
GO:0150012	positive regulation of neuron projection arborization	biological_process	12	Wnt5a	1	256	7	17887	0.0959995
GO:0051045	negative regulation of membrane protein ectodomain proteolysis	biological_process	9	Timp1	1	256	7	17887	0.0959995
GO:0003337	mesenchymal to epithelial transition involved in metanephros morphogenesis	biological_process	8	Pax8	1	256	7	17887	0.0959995
GO:0014832	urinary bladder smooth muscle contraction	biological_process	9	LOC103694905	1	256	7	17887	0.0959995
GO:2000553	positive regulation of T-helper 2 cell cytokine production	biological_process	12	Il6	1	256	7	17887	0.0959995
GO:1903288	positive regulation of potassium ion import across plasma membrane	biological_process	12	Wnk2	1	256	7	17887	0.0959995
GO:1904948	midbrain dopaminergic neuron differentiation	biological_process	8	Wnt5a	1	256	7	17887	0.0959995
GO:0044326	dendritic spine neck	cellular_component	4	Ppp1r1b	1	256	7	17887	0.0959995
GO:0006739	NADP metabolic process	biological_process	4	Fmo2	1	256	7	17887	0.0959995
GO:0061037	negative regulation of cartilage development	biological_process	7	Frzb	1	256	7	17887	0.0959995
GO:0031432	titin binding	molecular_function	6	Ankrd1	1	256	7	17887	0.0959995
GO:0072164	mesonephric tubule development	biological_process	6	Pax8	1	256	7	17887	0.0959995
GO:0010941	regulation of cell death	biological_process	6	Clnk	1	256	7	17887	0.0959995
GO:0050650	chondroitin sulfate proteoglycan biosynthetic process	biological_process	10	Cytl1	1	256	7	17887	0.0959995
GO:0003344	pericardium morphogenesis	biological_process	8	Wnt5a	1	256	7	17887	0.0959995
GO:0031731	CCR6 chemokine receptor binding	molecular_function	9	Defb3	1	256	7	17887	0.0959995
GO:0001955	blood vessel maturation	biological_process	6	Mmp2	1	256	7	17887	0.0959995
GO:1902617	response to fluoride	biological_process	6	Col1a1	1	256	7	17887	0.0959995
GO:0038024	cargo receptor activity	molecular_function	3	Marco	1	256	7	17887	0.0959995
GO:1903980	positive regulation of microglial cell activation	biological_process	9	Trem2	1	256	7	17887	0.0959995
GO:1903671	negative regulation of sprouting angiogenesis	biological_process	9	Thbs1	1	256	7	17887	0.0959995
GO:0048791	calcium ion-regulated exocytosis of neurotransmitter	biological_process	10	Doc2b	1	256	7	17887	0.0959995
GO:0042713	sperm ejaculation	biological_process	5	Avpr1a	1	256	7	17887	0.0959995
GO:0090009	primitive streak formation	biological_process	5	Wnt5a	1	256	7	17887	0.0959995
GO:0040011	locomotion	biological_process	3	Atp1a2	1	256	7	17887	0.0959995
GO:0060371	regulation of atrial cardiac muscle cell membrane depolarization	biological_process	7	Scn3b	1	256	7	17887	0.0959995
GO:0046653	tetrahydrofolate metabolic process	biological_process	7	Dhfr	1	256	7	17887	0.0959995
GO:0016176	superoxide-generating NADPH oxidase activator activity	molecular_function	6	Noxo1	1	256	7	17887	0.0959995
GO:0097242	amyloid-beta clearance	biological_process	4	Marco	1	256	7	17887	0.0959995
GO:0014883	transition between fast and slow fiber	biological_process	8	Myh7	1	256	7	17887	0.0959995
GO:0048341	paraxial mesoderm formation	biological_process	7	Wnt5a	1	256	7	17887	0.0959995
GO:0043589	skin morphogenesis	biological_process	6	Col1a1	1	256	7	17887	0.0959995
GO:0008061	chitin binding	molecular_function	5	Chia	1	256	7	17887	0.0959995
GO:0071774	response to fibroblast growth factor	biological_process	5	Tnc	1	256	7	17887	0.0959995
GO:0043395	heparan sulfate proteoglycan binding	molecular_function	6	Fst	1	256	7	17887	0.0959995
GO:0097237	cellular response to toxic substance	biological_process	6	Abtb2	1	256	7	17887	0.0959995
GO:0045277	respiratory chain complex IV	cellular_component	5	Cox8b	1	256	7	17887	0.0959995
GO:0003208	cardiac ventricle morphogenesis	biological_process	6	Heyl	1	256	7	17887	0.0959995
GO:0010839	negative regulation of keratinocyte proliferation	biological_process	9	Slurp1	1	256	7	17887	0.0959995
GO:0030867	rough endoplasmic reticulum membrane	cellular_component	6	Nat8l	1	256	7	17887	0.0959995
GO:0050878	regulation of body fluid levels	biological_process	5	Nppa	1	256	7	17887	0.0959995
GO:0046321	positive regulation of fatty acid oxidation	biological_process	10	Ppargc1a	1	256	7	17887	0.0959995
GO:0090527	actin filament reorganization	biological_process	7	Gsn	1	256	7	17887	0.0959995
GO:0055078	sodium ion homeostasis	biological_process	10	Scn7a	1	256	7	17887	0.0959995
GO:0060740	prostate gland epithelium morphogenesis	biological_process	7	Tnc	1	256	7	17887	0.0959995
GO:0003198	epithelial to mesenchymal transition involved in endocardial cushion formation	biological_process	9	Heyl	1	256	7	17887	0.0959995
GO:0034755	iron ion transmembrane transport	biological_process	11	Scara5	1	256	7	17887	0.0959995
GO:0005391	sodium:potassium-exchanging ATPase activity	molecular_function	11	Atp1a2	1	256	7	17887	0.0959995
GO:0007162	negative regulation of cell adhesion	biological_process	6	Rnd1;Tnc	2	256	37	17887	0.0980656
GO:0046034	ATP metabolic process	biological_process	4	Myh7;Atp1a2	2	256	37	17887	0.0980656
GO:0016529	sarcoplasmic reticulum	cellular_component	7	Ryr2;Slc2a4	2	256	37	17887	0.0980656
GO:0032870	cellular response to hormone stimulus	biological_process	6	Pgf;Avpr1a	2	256	37	17887	0.0980656
GO:0001658	branching involved in ureteric bud morphogenesis	biological_process	7	Pgf;Pax8	2	256	37	17887	0.0980656
GO:0007204	positive regulation of cytosolic calcium ion concentration	biological_process	13	Avpr1a;Ric3;Cxcr1;Tac4	4	256	122	17887	0.0981264
GO:0004867	serine-type endopeptidase inhibitor activity	molecular_function	8	Serpinb5;Tfpi2;Serpine1	3	256	77	17887	0.0982822
GO:0043231	intracellular membrane-bounded organelle	cellular_component	5	Ric3;Fmo6;Fmo2;Bcl3;Nat8l;Ppargc1a;Fmo3;Hmox1;Slc2a4;Slc7a11;Syt13;Rnd1;Flrt2;Cyp2e1	14	256	669	17887	0.100833
GO:0007218	neuropeptide signaling pathway	biological_process	6	Nppa;Sstr1;Ecel1	3	256	78	17887	0.101188
GO:0007626	locomotory behavior	biological_process	4	Slurp1;Ppp1r1b;Sod2	3	256	78	17887	0.101188
GO:0035556	intracellular signal transduction	biological_process	5	Adcy1;Ppp1r1b;Clnk;Hmox1;Wnk2;Asb15;Stk32b;Lax1;Scg2	9	256	384	17887	0.10145
GO:0048015	phosphatidylinositol-mediated signaling	biological_process	7	Gsn;Pik3c2g	2	256	38	17887	0.102575
GO:0045599	negative regulation of fat cell differentiation	biological_process	8	Wnt5a;Sod2	2	256	38	17887	0.102575
GO:0045944	positive regulation of transcription by RNA polymerase II	biological_process	10	Zbtb16;Aknad1;Pax8;Pou3f3;Nkx2-8;Il6;Klf15;Gli1;St18;Inhba;Tef;Cytl1;Wnt5a;Lif;Ppargc1a;Ptprn;Etv4;Tbx18;Heyl	19	256	971	17887	0.103978
GO:0009636	response to toxic substance	biological_process	5	Slc7a11;Cldn1;Scn9a	3	256	80	17887	0.107102
GO:0007417	central nervous system development	biological_process	6	Zbtb16;Areg;Pax8	3	256	80	17887	0.107102
GO:0007193	adenylate cyclase-inhibiting G protein-coupled receptor signaling pathway	biological_process	8	Ffar3;Marco	2	256	39	17887	0.10714
GO:0045600	positive regulation of fat cell differentiation	biological_process	8	Frzb;Zbtb16	2	256	39	17887	0.10714
GO:0098656	anion transmembrane transport	biological_process	8	Slc26a4;Slc4a1	2	256	39	17887	0.10714
GO:0043588	skin development	biological_process	6	Col3a1;Col1a1	2	256	39	17887	0.10714
GO:0050919	negative chemotaxis	biological_process	6	Wnt5a;Flrt2	2	256	39	17887	0.10714
GO:0010595	positive regulation of endothelial cell migration	biological_process	10	Wnt5a;Thbs1	2	256	39	17887	0.10714
GO:0043252	sodium-independent organic anion transport	biological_process	9	Slco1a1	1	256	8	17887	0.108943
GO:0048733	sebaceous gland development	biological_process	7	Krt76	1	256	8	17887	0.108943
GO:0006000	fructose metabolic process	biological_process	8	Pfkfb1	1	256	8	17887	0.108943
GO:0051223	regulation of protein transport	biological_process	8	Slc7a11	1	256	8	17887	0.108943
GO:0005000	vasopressin receptor activity	molecular_function	7	Avpr1a	1	256	8	17887	0.108943
GO:0048935	peripheral nervous system neuron development	biological_process	7	Ntrk2	1	256	8	17887	0.108943
GO:0045926	negative regulation of growth	biological_process	6	Mt2A	1	256	8	17887	0.108943
GO:0031340	positive regulation of vesicle fusion	biological_process	9	Doc2b	1	256	8	17887	0.108943
GO:0035900	response to isolation stress	biological_process	5	Sod2	1	256	8	17887	0.108943
GO:0071470	cellular response to osmotic stress	biological_process	6	Slc2a4	1	256	8	17887	0.108943
GO:0001667	ameboidal-type cell migration	biological_process	7	Wnt5a	1	256	8	17887	0.108943
GO:0032593	insulin-responsive compartment	cellular_component	9	Slc2a4	1	256	8	17887	0.108943
GO:0002021	response to dietary excess	biological_process	7	Ppargc1a	1	256	8	17887	0.108943
GO:0051014	actin filament severing	biological_process	5	Gsn	1	256	8	17887	0.108943
GO:0097542	ciliary tip	cellular_component	5	Gli1	1	256	8	17887	0.108943
GO:0016528	sarcoplasm	cellular_component	6	Gsn	1	256	8	17887	0.108943
GO:0007168	receptor guanylyl cyclase signaling pathway	biological_process	7	Nppa	1	256	8	17887	0.108943
GO:0003084	positive regulation of systemic arterial blood pressure	biological_process	7	Avpr1a	1	256	8	17887	0.108943
GO:0002741	positive regulation of cytokine secretion involved in immune response	biological_process	9	Wnt5a	1	256	8	17887	0.108943
GO:0050665	hydrogen peroxide biosynthetic process	biological_process	8	Sod2	1	256	8	17887	0.108943
GO:0042538	hyperosmotic salinity response	biological_process	7	Cldn1	1	256	8	17887	0.108943
GO:0000002	mitochondrial genome maintenance	biological_process	7	Slc25a33	1	256	8	17887	0.108943
GO:0004415	hyalurononglucosaminidase activity	molecular_function	8	Cemip	1	256	8	17887	0.108943
GO:1902808	positive regulation of cell cycle G1/S phase transition	biological_process	10	Gli1	1	256	8	17887	0.108943
GO:0034101	erythrocyte homeostasis	biological_process	5	Hmox1	1	256	8	17887	0.108943
GO:0030240	skeletal muscle thin filament assembly	biological_process	7	Acta1	1	256	8	17887	0.108943
GO:0031960	response to corticosteroid	biological_process	7	Col1a1	1	256	8	17887	0.108943
GO:0071371	cellular response to gonadotropin stimulus	biological_process	7	Pax8	1	256	8	17887	0.108943
GO:0004862	cAMP-dependent protein kinase inhibitor activity	molecular_function	9	Pkib	1	256	8	17887	0.108943
GO:0015347	sodium-independent organic anion transmembrane transporter activity	molecular_function	8	Slco1a1	1	256	8	17887	0.108943
GO:0097028	dendritic cell differentiation	biological_process	7	Trem2	1	256	8	17887	0.108943
GO:0097386	glial cell projection	cellular_component	6	Scn7a	1	256	8	17887	0.108943
GO:0014009	glial cell proliferation	biological_process	4	Areg	1	256	8	17887	0.108943
GO:0006012	galactose metabolic process	biological_process	8	Ppargc1a	1	256	8	17887	0.108943
GO:1904783	positive regulation of NMDA glutamate receptor activity	biological_process	10	Ccl2	1	256	8	17887	0.108943
GO:0050662	coenzyme binding	molecular_function	5	Gch1	1	256	8	17887	0.108943
GO:0010225	response to UV-C	biological_process	8	Bcl3	1	256	8	17887	0.108943
GO:1990845	adaptive thermogenesis	biological_process	4	Ppargc1a	1	256	8	17887	0.108943
GO:0090557	establishment of endothelial intestinal barrier	biological_process	9	Cldn1	1	256	8	17887	0.108943
GO:0060402	calcium ion transport into cytosol	biological_process	14	Ryr2	1	256	8	17887	0.108943
GO:0031227	intrinsic component of endoplasmic reticulum membrane	cellular_component	6	Cyp2e1	1	256	8	17887	0.108943
GO:0016494	C-X-C chemokine receptor activity	molecular_function	9	Cxcr1	1	256	8	17887	0.108943
GO:0017121	plasma membrane phospholipid scrambling	biological_process	7	Slc4a1	1	256	8	17887	0.108943
GO:0060137	maternal process involved in parturition	biological_process	5	Ccl2	1	256	8	17887	0.108943
GO:0015279	store-operated calcium channel activity	molecular_function	9	Trpc4	1	256	8	17887	0.108943
GO:0019870	potassium channel inhibitor activity	molecular_function	7	Wnk2	1	256	8	17887	0.108943
GO:0048644	muscle organ morphogenesis	biological_process	6	Lif	1	256	8	17887	0.108943
GO:0030665	clathrin-coated vesicle membrane	cellular_component	8	Cemip	1	256	8	17887	0.108943
GO:0046548	retinal rod cell development	biological_process	9	Ntrk2	1	256	8	17887	0.108943
GO:0045822	negative regulation of heart contraction	biological_process	9	Atp1a2	1	256	8	17887	0.108943
GO:0032926	negative regulation of activin receptor signaling pathway	biological_process	10	Fst	1	256	8	17887	0.108943
GO:0032836	glomerular basement membrane development	biological_process	7	Nid1	1	256	8	17887	0.108943
GO:0016051	carbohydrate biosynthetic process	biological_process	6	Chst13	1	256	8	17887	0.108943
GO:0045010	actin nucleation	biological_process	7	Gsn	1	256	8	17887	0.108943
GO:0032414	positive regulation of ion transmembrane transporter activity	biological_process	7	Wnk2	1	256	8	17887	0.108943
GO:0051151	negative regulation of smooth muscle cell differentiation	biological_process	9	Ereg	1	256	8	17887	0.108943
GO:0051597	response to methylmercury	biological_process	6	Arg1	1	256	8	17887	0.108943
GO:0047086	ketosteroid monooxygenase activity	molecular_function	7	Akr1c19	1	256	8	17887	0.108943
GO:0045666	positive regulation of neuron differentiation	biological_process	10	Heyl;Il6;Brinp2	3	256	81	17887	0.110109
GO:0006644	phospholipid metabolic process	biological_process	7	Pla2g2a;Hmox1	2	256	40	17887	0.111758
GO:0006694	steroid biosynthetic process	biological_process	7	Timp1;Hmgcs2	2	256	40	17887	0.111758
GO:0090263	positive regulation of canonical Wnt signaling pathway	biological_process	10	Col1a1;Wnk2;Ror2	3	256	82	17887	0.113147
GO:0030246	carbohydrate binding	molecular_function	4	Klrg1;Klri2;Klrd1;Galnt14;Sele	5	256	179	17887	0.114786
GO:0007623	circadian rhythm	biological_process	4	Ntrk2;Adcy1;LOC103694905	3	256	83	17887	0.116218
GO:0006749	glutathione metabolic process	biological_process	8	Slc7a11;Sod2	2	256	41	17887	0.116427
GO:0051897	positive regulation of protein kinase B signaling	biological_process	10	Thbs1;Il6;F3	3	256	84	17887	0.11932
GO:0010243	response to organonitrogen compound	biological_process	6	Cdo1;Cyp2e1	2	256	42	17887	0.121145
GO:0006936	muscle contraction	biological_process	6	Myh7;Scn7a	2	256	42	17887	0.121145
GO:0005905	clathrin-coated pit	cellular_component	4	Slc2a4;Sele	2	256	42	17887	0.121145
GO:0009898	cytoplasmic side of plasma membrane	cellular_component	5	Gem;Slc4a1	2	256	42	17887	0.121145
GO:0010862	positive regulation of pathway-restricted SMAD protein phosphorylation	biological_process	11	Inhba;Bmp8b	2	256	42	17887	0.121145
GO:0071364	cellular response to epidermal growth factor stimulus	biological_process	6	Col1a1;Erbb4	2	256	42	17887	0.121145
GO:0008630	intrinsic apoptotic signaling pathway in response to DNA damage	biological_process	7	Hmox1;Sod2	2	256	42	17887	0.121145
GO:0060291	long-term synaptic potentiation	biological_process	10	Ntrk2;LOC103694905	2	256	42	17887	0.121145
GO:0071377	cellular response to glucagon stimulus	biological_process	8	Arg1	1	256	9	17887	0.121701
GO:0032835	glomerulus development	biological_process	5	Heyl	1	256	9	17887	0.121701
GO:0003016	respiratory system process	biological_process	5	Ecel1	1	256	9	17887	0.121701
GO:0071872	cellular response to epinephrine stimulus	biological_process	9	Ryr2	1	256	9	17887	0.121701
GO:0045741	positive regulation of epidermal growth factor-activated receptor activity	biological_process	10	Ereg	1	256	9	17887	0.121701
GO:0036376	sodium ion export across plasma membrane	biological_process	11	Atp1a2	1	256	9	17887	0.121701
GO:0044597	daunorubicin metabolic process	biological_process	6	Akr1c19	1	256	9	17887	0.121701
GO:0085029	extracellular matrix assembly	biological_process	6	Has2	1	256	9	17887	0.121701
GO:2001241	positive regulation of extrinsic apoptotic signaling pathway in absence of ligand	biological_process	11	Inhba	1	256	9	17887	0.121701
GO:0016504	peptidase activator activity	molecular_function	6	PCOLCE2	1	256	9	17887	0.121701
GO:0099601	regulation of neurotransmitter receptor activity	biological_process	9	Slurp1	1	256	9	17887	0.121701
GO:2001171	positive regulation of ATP biosynthetic process	biological_process	12	Ppargc1a	1	256	9	17887	0.121701
GO:0007217	tachykinin receptor signaling pathway	biological_process	6	Tac4	1	256	9	17887	0.121701
GO:0001553	luteinization	biological_process	5	Ptprn	1	256	9	17887	0.121701
GO:0014732	skeletal muscle atrophy	biological_process	9	Ppargc1a	1	256	9	17887	0.121701
GO:0050707	regulation of cytokine secretion	biological_process	7	Tlr5	1	256	9	17887	0.121701
GO:0048246	macrophage chemotaxis	biological_process	6	Ccl2	1	256	9	17887	0.121701
GO:0045080	positive regulation of chemokine biosynthetic process	biological_process	9	Wnt5a	1	256	9	17887	0.121701
GO:0055119	relaxation of cardiac muscle	biological_process	7	Atp1a2	1	256	9	17887	0.121701
GO:0050801	ion homeostasis	biological_process	7	Wnk2	1	256	9	17887	0.121701
GO:0033690	positive regulation of osteoblast proliferation	biological_process	8	Tmem119	1	256	9	17887	0.121701
GO:0060081	membrane hyperpolarization	biological_process	6	Cftr	1	256	9	17887	0.121701
GO:0045820	negative regulation of glycolytic process	biological_process	11	Ppargc1a	1	256	9	17887	0.121701
GO:0047023	androsterone dehydrogenase activity	molecular_function	7	Akr1c19	1	256	9	17887	0.121701
GO:0044598	doxorubicin metabolic process	biological_process	6	Akr1c19	1	256	9	17887	0.121701
GO:0031748	D1 dopamine receptor binding	molecular_function	8	Ppp1r1b	1	256	9	17887	0.121701
GO:0071243	cellular response to arsenic-containing substance	biological_process	6	Hmox1	1	256	9	17887	0.121701
GO:0042589	zymogen granule membrane	cellular_component	8	Clca1	1	256	9	17887	0.121701
GO:0060700	regulation of ribonuclease activity	biological_process	9	Oas1e	1	256	9	17887	0.121701
GO:0060068	vagina development	biological_process	8	Wnt5a	1	256	9	17887	0.121701
GO:0003143	embryonic heart tube morphogenesis	biological_process	6	Ryr2	1	256	9	17887	0.121701
GO:0046007	negative regulation of activated T cell proliferation	biological_process	12	Arg1	1	256	9	17887	0.121701
GO:0014049	positive regulation of glutamate secretion	biological_process	10	Avpr1a	1	256	9	17887	0.121701
GO:0003184	pulmonary valve morphogenesis	biological_process	6	Heyl	1	256	9	17887	0.121701
GO:0043653	mitochondrial fragmentation involved in apoptotic process	biological_process	8	Erbb4	1	256	9	17887	0.121701
GO:0009404	toxin metabolic process	biological_process	5	Fmo2	1	256	9	17887	0.121701
GO:0032695	negative regulation of interleukin-12 production	biological_process	8	Thbs1	1	256	9	17887	0.121701
GO:0015125	bile acid transmembrane transporter activity	molecular_function	5	Slco1a1	1	256	9	17887	0.121701
GO:0061337	cardiac conduction	biological_process	9	Scn3b	1	256	9	17887	0.121701
GO:1901222	regulation of NIK/NF-kappaB signaling	biological_process	9	Bcl3	1	256	9	17887	0.121701
GO:0090399	replicative senescence	biological_process	6	Serpine1	1	256	9	17887	0.121701
GO:0045334	clathrin-coated endocytic vesicle	cellular_component	9	Cemip	1	256	9	17887	0.121701
GO:0043020	NADPH oxidase complex	cellular_component	6	Noxo1	1	256	9	17887	0.121701
GO:0035865	cellular response to potassium ion	biological_process	8	Ppargc1a	1	256	9	17887	0.121701
GO:0097066	response to thyroid hormone	biological_process	6	Ppargc1a	1	256	9	17887	0.121701
GO:0051549	positive regulation of keratinocyte migration	biological_process	10	Has2	1	256	9	17887	0.121701
GO:1904645	response to amyloid-beta	biological_process	8	Mmp2	1	256	9	17887	0.121701
GO:0007229	integrin-mediated signaling pathway	biological_process	6	Itgb8;Col3a1;Itga11	3	256	86	17887	0.125614
GO:0007267	cell-cell signaling	biological_process	5	Gpnmb;Ereg	2	256	43	17887	0.12591
GO:0032880	regulation of protein localization	biological_process	6	Slc26a4;Wnt5a	2	256	43	17887	0.12591
GO:0045111	intermediate filament cytoskeleton	cellular_component	7	Krt8;S100a8	2	256	43	17887	0.12591
GO:0007275	multicellular organism development	biological_process	4	Flrt2;Ntrk2;Fst;Angpt2;Wnt5a;Ereg;Pgf;Pax8;Frzb	9	256	404	17887	0.127126
GO:0001540	amyloid-beta binding	molecular_function	6	Marco;Trem2	2	256	44	17887	0.130718
GO:0003151	outflow tract morphogenesis	biological_process	5	Eln;Heyl	2	256	44	17887	0.130718
GO:0048468	cell development	biological_process	5	Inhba;Bmp8b	2	256	44	17887	0.130718
GO:0005925	focal adhesion	cellular_component	7	Fam107a;Gsn;Flrt2;Itga11	4	256	136	17887	0.131287
GO:0042803	protein homodimerization activity	molecular_function	6	Erbb4;Cd79a;Add2;Adrb3;Zbtb16;Gch1;Slc4a1;Gzma;Hmox1;Heyl;Tef;Lcn2;Pgf;Ntrk2	14	256	702	17887	0.133008
GO:0071880	adenylate cyclase-activating adrenergic receptor signaling pathway	biological_process	9	Adrb3	1	256	10	17887	0.134278
GO:0051593	response to folic acid	biological_process	6	Gsn	1	256	10	17887	0.134278
GO:0060452	positive regulation of cardiac muscle contraction	biological_process	10	Nppa	1	256	10	17887	0.134278
GO:0007494	midgut development	biological_process	7	Wnt5a	1	256	10	17887	0.134278
GO:0048333	mesodermal cell differentiation	biological_process	6	Inhba	1	256	10	17887	0.134278
GO:0030510	regulation of BMP signaling pathway	biological_process	10	Fst	1	256	10	17887	0.134278
GO:0043616	keratinocyte proliferation	biological_process	5	Ereg	1	256	10	17887	0.134278
GO:0010881	regulation of cardiac muscle contraction by regulation of the release of sequestered calcium ion	biological_process	9	Ryr2	1	256	10	17887	0.134278
GO:0019531	oxalate transmembrane transporter activity	molecular_function	8	Slc26a4	1	256	10	17887	0.134278
GO:0008191	metalloendopeptidase inhibitor activity	molecular_function	8	Timp1	1	256	10	17887	0.134278
GO:0045956	positive regulation of calcium ion-dependent exocytosis	biological_process	10	Doc2b	1	256	10	17887	0.134278
GO:0006825	copper ion transport	biological_process	10	Atp7b	1	256	10	17887	0.134278
GO:0140110	transcription regulator activity	molecular_function	3	St18	1	256	10	17887	0.134278
GO:0005513	detection of calcium ion	biological_process	6	Ryr2	1	256	10	17887	0.134278
GO:0003181	atrioventricular valve morphogenesis	biological_process	6	Heyl	1	256	10	17887	0.134278
GO:1990314	cellular response to insulin-like growth factor stimulus	biological_process	8	Slc25a33	1	256	10	17887	0.134278
GO:0051246	regulation of protein metabolic process	biological_process	7	Hpx	1	256	10	17887	0.134278
GO:0043303	mast cell degranulation	biological_process	9	Tac4	1	256	10	17887	0.134278
GO:0019532	oxalate transport	biological_process	11	Slc26a4	1	256	10	17887	0.134278
GO:0008514	organic anion transmembrane transporter activity	molecular_function	7	Slco1a1	1	256	10	17887	0.134278
GO:0050777	negative regulation of immune response	biological_process	7	Col3a1	1	256	10	17887	0.134278
GO:0021954	central nervous system neuron development	biological_process	7	Ntrk2	1	256	10	17887	0.134278
GO:0030195	negative regulation of blood coagulation	biological_process	8	Adtrp	1	256	10	17887	0.134278
GO:0005890	sodium:potassium-exchanging ATPase complex	cellular_component	8	Atp1a2	1	256	10	17887	0.134278
GO:0048711	positive regulation of astrocyte differentiation	biological_process	12	Lif	1	256	10	17887	0.134278
GO:0030955	potassium ion binding	molecular_function	8	Atp1a2	1	256	10	17887	0.134278
GO:0019227	neuronal action potential propagation	biological_process	6	Ntrk2	1	256	10	17887	0.134278
GO:0034551	mitochondrial respiratory chain complex III assembly	biological_process	10	Slc25a33	1	256	10	17887	0.134278
GO:0030206	chondroitin sulfate biosynthetic process	biological_process	9	Chst13	1	256	10	17887	0.134278
GO:0006941	striated muscle contraction	biological_process	7	Myh7	1	256	10	17887	0.134278
GO:0043517	positive regulation of DNA damage response, signal transduction by p53 class mediator	biological_process	11	Ankrd1	1	256	10	17887	0.134278
GO:0010248	establishment or maintenance of transmembrane electrochemical gradient	biological_process	8	Atp1a2	1	256	10	17887	0.134278
GO:1990416	cellular response to brain-derived neurotrophic factor stimulus	biological_process	9	Ntrk2	1	256	10	17887	0.134278
GO:0050850	positive regulation of calcium-mediated signaling	biological_process	10	Trem2	1	256	10	17887	0.134278
GO:0010952	positive regulation of peptidase activity	biological_process	10	PCOLCE2	1	256	10	17887	0.134278
GO:0032270	positive regulation of cellular protein metabolic process	biological_process	8	Inhba	1	256	10	17887	0.134278
GO:0006607	NLS-bearing protein import into nucleus	biological_process	12	LOC100359600	1	256	10	17887	0.134278
GO:0061029	eyelid development in camera-type eye	biological_process	5	Inhba	1	256	10	17887	0.134278
GO:0032052	bile acid binding	molecular_function	8	Akr1c19	1	256	10	17887	0.134278
GO:0008347	glial cell migration	biological_process	7	Ccl2	1	256	10	17887	0.134278
GO:0010820	positive regulation of T cell chemotaxis	biological_process	10	Wnt5a	1	256	10	17887	0.134278
GO:1902043	positive regulation of extrinsic apoptotic signaling pathway via death domain receptors	biological_process	11	Thbs1	1	256	10	17887	0.134278
GO:1900272	negative regulation of long-term synaptic potentiation	biological_process	6	Fam107a	1	256	10	17887	0.134278
GO:0016229	steroid dehydrogenase activity	molecular_function	5	Akr1c19	1	256	10	17887	0.134278
GO:0006171	cAMP biosynthetic process	biological_process	12	Adcy1	1	256	10	17887	0.134278
GO:0002262	myeloid cell homeostasis	biological_process	4	Il6	1	256	10	17887	0.134278
GO:0016322	neuron remodeling	biological_process	7	Rnd1	1	256	10	17887	0.134278
GO:0003300	cardiac muscle hypertrophy	biological_process	8	Ryr2	1	256	10	17887	0.134278
GO:0009897	external side of plasma membrane	cellular_component	5	AABR07065814;AABR07044397;Selp;Cxcr1;Thbs1;Il6;Slc2a4	7	256	297	17887	0.135186
GO:0008584	male gonad development	biological_process	7	Tlr5;Wnt5a;Inhba	3	256	89	17887	0.135273
GO:0004888	transmembrane signaling receptor activity	molecular_function	5	Cd79a;Gabrp;Tlr5;Sele	4	256	138	17887	0.136363
GO:0048471	perinuclear region of cytoplasm	cellular_component	6	Atp7b;Gsn;Hmox1;Mt2A;Ntrk2;Ccl2;Slc2a4;Nppa;Inhba;Sele;Pla2g2a	11	256	527	17887	0.136658
GO:0048666	neuron development	biological_process	6	Sod2;Lif	2	256	46	17887	0.140458
GO:0004896	cytokine receptor activity	molecular_function	6	Il22ra2;Osmr	2	256	46	17887	0.140458
GO:0033574	response to testosterone	biological_process	6	Thbs1;Slco1a1	2	256	46	17887	0.140458
GO:0030971	receptor tyrosine kinase binding	molecular_function	6	Ntrk2;Angpt2	2	256	46	17887	0.140458
GO:0006805	xenobiotic metabolic process	biological_process	5	Cyp2e1;Fmo2	2	256	46	17887	0.140458
GO:0042730	fibrinolysis	biological_process	9	Cpb2	1	256	11	17887	0.146675
GO:0030007	cellular potassium ion homeostasis	biological_process	11	Atp1a2	1	256	11	17887	0.146675
GO:0051310	metaphase plate congression	biological_process	8	Gem	1	256	11	17887	0.146675
GO:0004016	adenylate cyclase activity	molecular_function	5	Adcy1	1	256	11	17887	0.146675
GO:0031045	dense core granule	cellular_component	9	Scg2	1	256	11	17887	0.146675
GO:0007143	female meiotic nuclear division	biological_process	5	Ereg	1	256	11	17887	0.146675
GO:0098911	regulation of ventricular cardiac muscle cell action potential	biological_process	12	Ryr2	1	256	11	17887	0.146675
GO:0030898	actin-dependent ATPase activity	molecular_function	11	Myh7	1	256	11	17887	0.146675
GO:0043394	proteoglycan binding	molecular_function	5	Nid1	1	256	11	17887	0.146675
GO:0071711	basement membrane organization	biological_process	7	Flrt2	1	256	11	17887	0.146675
GO:0060445	branching involved in salivary gland morphogenesis	biological_process	7	Il6	1	256	11	17887	0.146675
GO:0006878	cellular copper ion homeostasis	biological_process	12	Atp7b	1	256	11	17887	0.146675
GO:0090179	planar cell polarity pathway involved in neural tube closure	biological_process	10	Wnt5a	1	256	11	17887	0.146675
GO:0048185	activin binding	molecular_function	5	Fst	1	256	11	17887	0.146675
GO:0042612	MHC class I protein complex	cellular_component	7	AABR07044397	1	256	11	17887	0.146675
GO:0032153	cell division site	cellular_component	4	Rnd1	1	256	11	17887	0.146675
GO:0086004	regulation of cardiac muscle cell contraction	biological_process	11	Atp1a2	1	256	11	17887	0.146675
GO:0002474	antigen processing and presentation of peptide antigen via MHC class I	biological_process	6	AABR07044397	1	256	11	17887	0.146675
GO:0055008	cardiac muscle tissue morphogenesis	biological_process	7	Ankrd1	1	256	11	17887	0.146675
GO:0060644	mammary gland epithelial cell differentiation	biological_process	7	Erbb4	1	256	11	17887	0.146675
GO:0060100	positive regulation of phagocytosis, engulfment	biological_process	9	Trem2	1	256	11	17887	0.146675
GO:0046626	regulation of insulin receptor signaling pathway	biological_process	8	Ffar3	1	256	11	17887	0.146675
GO:0042989	sequestering of actin monomers	biological_process	10	Gsn	1	256	11	17887	0.146675
GO:0035137	hindlimb morphogenesis	biological_process	7	Zbtb16	1	256	11	17887	0.146675
GO:0038084	vascular endothelial growth factor signaling pathway	biological_process	8	Pgf	1	256	11	17887	0.146675
GO:0035136	forelimb morphogenesis	biological_process	7	Zbtb16	1	256	11	17887	0.146675
GO:1904322	cellular response to forskolin	biological_process	7	Cftr	1	256	11	17887	0.146675
GO:0045667	regulation of osteoblast differentiation	biological_process	7	Gli1	1	256	11	17887	0.146675
GO:0003085	negative regulation of systemic arterial blood pressure	biological_process	7	Nppa	1	256	11	17887	0.146675
GO:0099566	regulation of postsynaptic cytosolic calcium ion concentration	biological_process	13	Wnt5a	1	256	11	17887	0.146675
GO:0001618	virus receptor activity	molecular_function	5	Cldn1	1	256	11	17887	0.146675
GO:0006940	regulation of smooth muscle contraction	biological_process	9	Atp1a2	1	256	11	17887	0.146675
GO:0008271	secondary active sulfate transmembrane transporter activity	molecular_function	9	Slc26a4	1	256	11	17887	0.146675
GO:0021799	cerebral cortex radially oriented cell migration	biological_process	10	Pou3f3	1	256	11	17887	0.146675
GO:0006390	mitochondrial transcription	biological_process	10	Slc25a33	1	256	11	17887	0.146675
GO:2000811	negative regulation of anoikis	biological_process	10	Ntrk2	1	256	11	17887	0.146675
GO:0007588	excretion	biological_process	5	Pou3f3	1	256	11	17887	0.146675
GO:0097449	astrocyte projection	cellular_component	7	Slc7a11	1	256	11	17887	0.146675
GO:0008154	actin polymerization or depolymerization	biological_process	7	Gsn	1	256	11	17887	0.146675
GO:0044327	dendritic spine head	cellular_component	4	Ppp1r1b	1	256	11	17887	0.146675
GO:0002087	regulation of respiratory gaseous exchange by neurological system process	biological_process	8	Atp1a2	1	256	11	17887	0.146675
GO:0062009	secondary palate development	biological_process	6	Wnt5a	1	256	11	17887	0.146675
GO:0061049	cell growth involved in cardiac muscle cell development	biological_process	6	Nppa	1	256	11	17887	0.146675
GO:0072001	renal system development	biological_process	6	Tbx18	1	256	11	17887	0.146675
GO:0032793	positive regulation of CREB transcription factor activity	biological_process	7	Adcy1	1	256	11	17887	0.146675
GO:0006790	sulfur compound metabolic process	biological_process	5	Pax8	1	256	11	17887	0.146675
GO:0035091	phosphatidylinositol binding	molecular_function	6	Noxo1;Mreg;Pik3c2g	3	256	93	17887	0.148534
GO:0030308	negative regulation of cell growth	biological_process	7	Inhba;Nppa;Frzb	3	256	93	17887	0.148534
GO:0009952	anterior/posterior pattern specification	biological_process	6	Wnt5a;Heyl;Zbtb16	3	256	93	17887	0.148534
GO:0030145	manganese ion binding	molecular_function	8	Sod2;Arg1	2	256	48	17887	0.150348
GO:0045860	positive regulation of protein kinase activity	biological_process	11	Ereg;Wnt5a	2	256	48	17887	0.150348
GO:0120162	positive regulation of cold-induced thermogenesis	biological_process	7	Ppargc1a;Lcn2;Adrb3	3	256	94	17887	0.151913
GO:0099061	integral component of postsynaptic density membrane	cellular_component	6	Erbb4;Adcy1	2	256	49	17887	0.155344
GO:0043065	positive regulation of apoptotic process	biological_process	9	Gzma;Tnfrsf12a;Frzb;Zbtb16;Ankrd1;Hmox1	6	256	254	17887	0.158008
GO:0030336	negative regulation of cell migration	biological_process	8	Slurp1;Serpine1;Il24	3	256	96	17887	0.158744
GO:0060766	negative regulation of androgen receptor signaling pathway	biological_process	10	Heyl	1	256	12	17887	0.158895
GO:0016331	morphogenesis of embryonic epithelium	biological_process	7	Tbx18	1	256	12	17887	0.158895
GO:0010765	positive regulation of sodium ion transport	biological_process	10	Scn3b	1	256	12	17887	0.158895
GO:0030728	ovulation	biological_process	5	Ereg	1	256	12	17887	0.158895
GO:0019373	epoxygenase P450 pathway	biological_process	12	Cyp2e1	1	256	12	17887	0.158895
GO:0043652	engulfment of apoptotic cell	biological_process	9	Thbs1	1	256	12	17887	0.158895
GO:0015278	calcium-release channel activity	molecular_function	9	Ryr2	1	256	12	17887	0.158895
GO:0032026	response to magnesium ion	biological_process	7	Thbs1	1	256	12	17887	0.158895
GO:0015711	organic anion transport	biological_process	8	Slco1a1	1	256	12	17887	0.158895
GO:0010763	positive regulation of fibroblast migration	biological_process	9	Thbs1	1	256	12	17887	0.158895
GO:0038063	collagen-activated tyrosine kinase receptor signaling pathway	biological_process	8	Col1a1	1	256	12	17887	0.158895
GO:0033141	positive regulation of peptidyl-serine phosphorylation of STAT protein	biological_process	12	Lif	1	256	12	17887	0.158895
GO:1902358	sulfate transmembrane transport	biological_process	10	Slc26a4	1	256	12	17887	0.158895
GO:0004935	adrenergic receptor activity	molecular_function	8	Adrb3	1	256	12	17887	0.158895
GO:0040015	negative regulation of multicellular organism growth	biological_process	8	Adrb3	1	256	12	17887	0.158895
GO:0007512	adult heart development	biological_process	7	Myh7	1	256	12	17887	0.158895
GO:0030212	hyaluronan metabolic process	biological_process	8	Has2	1	256	12	17887	0.158895
GO:0015116	sulfate transmembrane transporter activity	molecular_function	8	Slc26a4	1	256	12	17887	0.158895
GO:0045721	negative regulation of gluconeogenesis	biological_process	11	Il6	1	256	12	17887	0.158895
GO:0051896	regulation of protein kinase B signaling	biological_process	9	Ntrk2	1	256	12	17887	0.158895
GO:0046426	negative regulation of receptor signaling pathway via JAK-STAT	biological_process	10	Bcl3	1	256	12	17887	0.158895
GO:0070306	lens fiber cell differentiation	biological_process	7	Slc7a11	1	256	12	17887	0.158895
GO:0042554	superoxide anion generation	biological_process	7	Sod2	1	256	12	17887	0.158895
GO:0071294	cellular response to zinc ion	biological_process	8	Mt2A	1	256	12	17887	0.158895
GO:0002082	regulation of oxidative phosphorylation	biological_process	10	Slc25a33	1	256	12	17887	0.158895
GO:0060340	positive regulation of type I interferon-mediated signaling pathway	biological_process	10	Wnt5a	1	256	12	17887	0.158895
GO:0014075	response to amine	biological_process	7	Arg1	1	256	12	17887	0.158895
GO:0007202	activation of phospholipase C activity	biological_process	11	Sele	1	256	12	17887	0.158895
GO:0016242	negative regulation of macroautophagy	biological_process	10	Hmox1	1	256	12	17887	0.158895
GO:0034185	apolipoprotein binding	molecular_function	5	Trem2	1	256	12	17887	0.158895
GO:0032402	melanosome transport	biological_process	9	Mreg	1	256	12	17887	0.158895
GO:0001775	cell activation	biological_process	4	Timp1	1	256	12	17887	0.158895
GO:2000353	positive regulation of endothelial cell apoptotic process	biological_process	11	Thbs1	1	256	12	17887	0.158895
GO:0019731	antibacterial humoral response	biological_process	7	Bpifa1	1	256	12	17887	0.158895
GO:0042416	dopamine biosynthetic process	biological_process	10	Gch1	1	256	12	17887	0.158895
GO:0071318	cellular response to ATP	biological_process	9	Ccl2	1	256	12	17887	0.158895
GO:0060065	uterus development	biological_process	6	Wnt5a	1	256	12	17887	0.158895
GO:0051090	regulation of DNA-binding transcription factor activity	biological_process	9	Hmox1	1	256	12	17887	0.158895
GO:0043229	intracellular organelle	cellular_component	4	Olr59	1	256	12	17887	0.158895
GO:0048143	astrocyte activation	biological_process	6	Mt2A	1	256	12	17887	0.158895
GO:0005452	inorganic anion exchanger activity	molecular_function	8	Slc4a1	1	256	12	17887	0.158895
GO:0060707	trophoblast giant cell differentiation	biological_process	6	Lif	1	256	12	17887	0.158895
GO:0047498	calcium-dependent phospholipase A2 activity	molecular_function	9	Pla2g2a	1	256	12	17887	0.158895
GO:0010838	positive regulation of keratinocyte proliferation	biological_process	9	Has2	1	256	12	17887	0.158895
GO:0003323	type B pancreatic cell development	biological_process	9	Wnt5a	1	256	12	17887	0.158895
GO:0086002	cardiac muscle cell action potential involved in contraction	biological_process	8	Scn3b	1	256	12	17887	0.158895
GO:0097440	apical dendrite	cellular_component	7	Ppargc1a	1	256	12	17887	0.158895
GO:0008631	intrinsic apoptotic signaling pathway in response to oxidative stress	biological_process	7	Sod2	1	256	12	17887	0.158895
GO:0042448	progesterone metabolic process	biological_process	8	Akr1c19	1	256	12	17887	0.158895
GO:0001818	negative regulation of cytokine production	biological_process	7	Gpnmb	1	256	12	17887	0.158895
GO:2000300	regulation of synaptic vesicle exocytosis	biological_process	7	LOC103694905;Adcy1	2	256	50	17887	0.160371
GO:0065003	protein-containing complex assembly	biological_process	6	Gch1;Add2	2	256	51	17887	0.165428
GO:0048146	positive regulation of fibroblast proliferation	biological_process	8	Ereg;Wnt5a	2	256	51	17887	0.165428
GO:0005044	scavenger receptor activity	molecular_function	4	Marco;Scara5	2	256	51	17887	0.165428
GO:0045165	cell fate commitment	biological_process	5	Ror2;Erbb4	2	256	51	17887	0.165428
GO:0021549	cerebellum development	biological_process	5	Ppargc1a;Sstr1	2	256	51	17887	0.165428
GO:0032869	cellular response to insulin stimulus	biological_process	8	Slc2a4;Ccl2;Slc25a33	3	256	98	17887	0.165667
GO:0031526	brush border membrane	cellular_component	6	Slc26a4;Slc7a11	2	256	52	17887	0.170513
GO:0030414	peptidase inhibitor activity	molecular_function	6	Timp1;Tfpi2	2	256	52	17887	0.170513
GO:0045745	positive regulation of G protein-coupled receptor signaling pathway	biological_process	9	Wnt5a	1	256	13	17887	0.170941
GO:0035815	positive regulation of renal sodium excretion	biological_process	9	Avpr1a	1	256	13	17887	0.170941
GO:0003203	endocardial cushion morphogenesis	biological_process	7	Heyl	1	256	13	17887	0.170941
GO:0030539	male genitalia development	biological_process	7	Ror2	1	256	13	17887	0.170941
GO:0030330	DNA damage response, signal transduction by p53 class mediator	biological_process	8	Bcl3	1	256	13	17887	0.170941
GO:0005865	striated muscle thin filament	cellular_component	6	Acta1	1	256	13	17887	0.170941
GO:1903827	regulation of cellular protein localization	biological_process	7	Wnt5a	1	256	13	17887	0.170941
GO:0060317	cardiac epithelial to mesenchymal transition	biological_process	8	Heyl	1	256	13	17887	0.170941
GO:0071548	response to dexamethasone	biological_process	6	Cldn1	1	256	13	17887	0.170941
GO:0008509	anion transmembrane transporter activity	molecular_function	6	Slc4a1	1	256	13	17887	0.170941
GO:2001222	regulation of neuron migration	biological_process	8	Flrt2	1	256	13	17887	0.170941
GO:0002755	MyD88-dependent toll-like receptor signaling pathway	biological_process	9	Tlr5	1	256	13	17887	0.170941
GO:0021756	striatum development	biological_process	5	Slc7a11	1	256	13	17887	0.170941
GO:0006939	smooth muscle contraction	biological_process	7	LOC103694905	1	256	13	17887	0.170941
GO:0033197	response to vitamin E	biological_process	7	Arg1	1	256	13	17887	0.170941
GO:0097067	cellular response to thyroid hormone stimulus	biological_process	7	Ppargc1a	1	256	13	17887	0.170941
GO:0004032	alditol:NADP+ 1-oxidoreductase activity	molecular_function	9	Akr1c19	1	256	13	17887	0.170941
GO:0019430	removal of superoxide radicals	biological_process	7	Sod2	1	256	13	17887	0.170941
GO:2000310	regulation of NMDA receptor activity	biological_process	10	Ppargc1a	1	256	13	17887	0.170941
GO:0008272	sulfate transport	biological_process	9	Slc26a4	1	256	13	17887	0.170941
GO:0048546	digestive tract morphogenesis	biological_process	6	Wnt5a	1	256	13	17887	0.170941
GO:0071305	cellular response to vitamin D	biological_process	8	Tnc	1	256	13	17887	0.170941
GO:0032331	negative regulation of chondrocyte differentiation	biological_process	8	Adamts12	1	256	13	17887	0.170941
GO:0031672	A band	cellular_component	5	Myl7	1	256	13	17887	0.170941
GO:0003429	growth plate cartilage chondrocyte morphogenesis	biological_process	10	Col7a1	1	256	13	17887	0.170941
GO:0032722	positive regulation of chemokine production	biological_process	8	Ffar3	1	256	13	17887	0.170941
GO:0005355	glucose transmembrane transporter activity	molecular_function	9	Slc2a4	1	256	13	17887	0.170941
GO:0070679	inositol 1,4,5 trisphosphate binding	molecular_function	6	Trpc4	1	256	13	17887	0.170941
GO:0032731	positive regulation of interleukin-1 beta production	biological_process	9	Mnda	1	256	13	17887	0.170941
GO:0008392	arachidonic acid epoxygenase activity	molecular_function	7	Cyp2e1	1	256	13	17887	0.170941
GO:0070509	calcium ion import	biological_process	11	Trpc4	1	256	13	17887	0.170941
GO:0048066	developmental pigmentation	biological_process	4	Mreg	1	256	13	17887	0.170941
GO:0042711	maternal behavior	biological_process	6	Avpr1a	1	256	13	17887	0.170941
GO:0050678	regulation of epithelial cell proliferation	biological_process	7	Serpinb5	1	256	13	17887	0.170941
GO:0005227	calcium activated cation channel activity	molecular_function	8	Trpm5	1	256	13	17887	0.170941
GO:0010832	negative regulation of myotube differentiation	biological_process	10	Tmem119	1	256	13	17887	0.170941
GO:0070498	interleukin-1-mediated signaling pathway	biological_process	7	St18	1	256	13	17887	0.170941
GO:0031362	anchored component of external side of plasma membrane	cellular_component	7	Folr2	1	256	13	17887	0.170941
GO:2000484	positive regulation of interleukin-8 secretion	biological_process	9	Wnt5a	1	256	13	17887	0.170941
GO:0010033	response to organic substance	biological_process	5	Timp1;Wnt5a;Avpr1a	3	256	101	17887	0.176215
GO:0042593	glucose homeostasis	biological_process	8	Il6;Ffar3;Slc2a4	3	256	101	17887	0.176215
GO:0034220	ion transmembrane transport	biological_process	7	Trpm5;Gabrp;Kcnj4;Clca1	4	256	154	17887	0.179614
GO:0050680	negative regulation of epithelial cell proliferation	biological_process	8	Wnt5a;Nkx2-8	2	256	54	17887	0.180758
GO:0010466	negative regulation of peptidase activity	biological_process	10	Tfpi2;Timp1	2	256	54	17887	0.180758
GO:0031103	axon regeneration	biological_process	7	Dhfr	1	256	14	17887	0.182816
GO:0031674	I band	cellular_component	5	Ankrd1	1	256	14	17887	0.182816
GO:0006182	cGMP biosynthetic process	biological_process	12	Nppa	1	256	14	17887	0.182816
GO:0051481	negative regulation of cytosolic calcium ion concentration	biological_process	13	Atp1a2	1	256	14	17887	0.182816
GO:0008209	androgen metabolic process	biological_process	7	Ppargc1a	1	256	14	17887	0.182816
GO:0071425	hematopoietic stem cell proliferation	biological_process	5	Wnt5a	1	256	14	17887	0.182816
GO:0006883	cellular sodium ion homeostasis	biological_process	11	Atp1a2	1	256	14	17887	0.182816
GO:0001953	negative regulation of cell-matrix adhesion	biological_process	8	Thbs1	1	256	14	17887	0.182816
GO:0016010	dystrophin-associated glycoprotein complex	cellular_component	5	Krt8	1	256	14	17887	0.182816
GO:0045198	establishment of epithelial cell apical/basal polarity	biological_process	8	Wnt5a	1	256	14	17887	0.182816
GO:0042975	peroxisome proliferator activated receptor binding	molecular_function	6	Ppargc1a	1	256	14	17887	0.182816
GO:0034236	protein kinase A catalytic subunit binding	molecular_function	8	Ryr2	1	256	14	17887	0.182816
GO:0010181	FMN binding	molecular_function	7	Cyp2e1	1	256	14	17887	0.182816
GO:0007625	grooming behavior	biological_process	4	Avpr1a	1	256	14	17887	0.182816
GO:0034399	nuclear periphery	cellular_component	6	Ebna1bp2	1	256	14	17887	0.182816
GO:0000146	microfilament motor activity	molecular_function	10	Myh7	1	256	14	17887	0.182816
GO:0006123	mitochondrial electron transport, cytochrome c to oxygen	biological_process	10	Cox8b	1	256	14	17887	0.182816
GO:0007190	activation of adenylate cyclase activity	biological_process	6	Adrb3	1	256	14	17887	0.182816
GO:0050921	positive regulation of chemotaxis	biological_process	8	Thbs1	1	256	14	17887	0.182816
GO:0001836	release of cytochrome c from mitochondria	biological_process	8	Sod2	1	256	14	17887	0.182816
GO:0042692	muscle cell differentiation	biological_process	6	Fbxo40	1	256	14	17887	0.182816
GO:0043274	phospholipase binding	molecular_function	6	Sele	1	256	14	17887	0.182816
GO:0014902	myotube differentiation	biological_process	8	Avpr1a	1	256	14	17887	0.182816
GO:0033130	acetylcholine receptor binding	molecular_function	6	Ric3	1	256	14	17887	0.182816
GO:0043149	stress fiber assembly	biological_process	8	Eln	1	256	14	17887	0.182816
GO:0005623	cell	cellular_component	3	Tac4;Ccl12;Ryr2;Hpx	4	256	156	17887	0.185318
GO:0005902	microvillus	cellular_component	7	Clca1;Bpifa1	2	256	55	17887	0.185915
GO:0071944	cell periphery	cellular_component	4	Nid1;Krt8	2	256	55	17887	0.185915
GO:0003700	DNA-binding transcription factor activity	molecular_function	4	Nkx2-8;Pou3f3;Heyl;Tbx18;Klf15;St18;Pax8;Tef;Aff3;Etv4;Wnt5a;Foxs1;Zbtb16	13	256	687	17887	0.187441
GO:0007050	cell cycle arrest	biological_process	5	Inhba;Thbs1	2	256	56	17887	0.191093
GO:0001228	DNA-binding transcription activator activity, RNA polymerase II-specific	molecular_function	6	Pax8;Tbx18;Nkx2-8;Aknad1;Heyl;Klf15;Tef	7	256	328	17887	0.191666
GO:0055117	regulation of cardiac muscle contraction	biological_process	10	Ryr2	1	256	15	17887	0.19452
GO:0051895	negative regulation of focal adhesion assembly	biological_process	9	Fam107a	1	256	15	17887	0.19452
GO:0016702	oxidoreductase activity, acting on single donors with incorporation of molecular oxygen, incorporation of two atoms of oxygen	molecular_function	6	Cdo1	1	256	15	17887	0.19452
GO:0030594	neurotransmitter receptor activity	molecular_function	5	LOC103694905	1	256	15	17887	0.19452
GO:0042535	positive regulation of tumor necrosis factor biosynthetic process	biological_process	10	Thbs1	1	256	15	17887	0.19452
GO:0019395	fatty acid oxidation	biological_process	10	Ppargc1a	1	256	15	17887	0.19452
GO:0002042	cell migration involved in sprouting angiogenesis	biological_process	11	Adtrp	1	256	15	17887	0.19452
GO:1904706	negative regulation of vascular smooth muscle cell proliferation	biological_process	9	Hmox1	1	256	15	17887	0.19452
GO:0042310	vasoconstriction	biological_process	10	LOC103694905	1	256	15	17887	0.19452
GO:2000279	negative regulation of DNA biosynthetic process	biological_process	9	Ankrd1	1	256	15	17887	0.19452
GO:0015721	bile acid and bile salt transport	biological_process	8	Slco1a1	1	256	15	17887	0.19452
GO:0043034	costamere	cellular_component	5	Krt8	1	256	15	17887	0.19452
GO:0090051	negative regulation of cell migration involved in sprouting angiogenesis	biological_process	12	Thbs1	1	256	15	17887	0.19452
GO:0050773	regulation of dendrite development	biological_process	11	Ntrk2	1	256	15	17887	0.19452
GO:0030166	proteoglycan biosynthetic process	biological_process	9	Chst13	1	256	15	17887	0.19452
GO:2000010	positive regulation of protein localization to cell surface	biological_process	7	Erbb4	1	256	15	17887	0.19452
GO:0015179	L-amino acid transmembrane transporter activity	molecular_function	8	Slc7a11	1	256	15	17887	0.19452
GO:0050710	negative regulation of cytokine secretion	biological_process	8	Il6	1	256	15	17887	0.19452
GO:0001736	establishment of planar polarity	biological_process	6	Wnt5a	1	256	15	17887	0.19452
GO:0022409	positive regulation of cell-cell adhesion	biological_process	7	Ccl2	1	256	15	17887	0.19452
GO:0048148	behavioral response to cocaine	biological_process	5	Ppp1r1b	1	256	15	17887	0.19452
GO:0045410	positive regulation of interleukin-6 biosynthetic process	biological_process	9	Ereg	1	256	15	17887	0.19452
GO:0050709	negative regulation of protein secretion	biological_process	10	Adtrp	1	256	15	17887	0.19452
GO:0006937	regulation of muscle contraction	biological_process	8	Atp1a2	1	256	15	17887	0.19452
GO:0070330	aromatase activity	molecular_function	7	Cyp2e1	1	256	15	17887	0.19452
GO:0048598	embryonic morphogenesis	biological_process	5	Bmp8b	1	256	15	17887	0.19452
GO:1904469	positive regulation of tumor necrosis factor secretion	biological_process	10	Wnt5a	1	256	15	17887	0.19452
GO:0030140	trans-Golgi network transport vesicle	cellular_component	8	Slc2a4	1	256	15	17887	0.19452
GO:1904355	positive regulation of telomere capping	biological_process	11	Pkib	1	256	15	17887	0.19452
GO:1903204	negative regulation of oxidative stress-induced neuron death	biological_process	9	Slc7a11	1	256	15	17887	0.19452
GO:0001655	urogenital system development	biological_process	6	Pax8	1	256	15	17887	0.19452
GO:0004890	GABA-A receptor activity	molecular_function	7	Gabrp	1	256	15	17887	0.19452
GO:0050870	positive regulation of T cell activation	biological_process	9	Ccl2	1	256	15	17887	0.19452
GO:0098664	G protein-coupled serotonin receptor signaling pathway	biological_process	6	LOC103694905	1	256	15	17887	0.19452
GO:0002224	toll-like receptor signaling pathway	biological_process	8	Tlr5	1	256	15	17887	0.19452
GO:0048511	rhythmic process	biological_process	3	Ppargc1a;Tef	2	256	58	17887	0.201504
GO:0045727	positive regulation of translation	biological_process	10	Bcl3;Thbs1	2	256	58	17887	0.201504
GO:0044212	transcription regulatory region DNA binding	molecular_function	7	Pax8;Gli1;Wnt5a;Erbb4;Klf15	5	256	219	17887	0.205737
GO:0009954	proximal/distal pattern formation	biological_process	6	Gli1	1	256	16	17887	0.206058
GO:0021591	ventricular system development	biological_process	6	Slc7a11	1	256	16	17887	0.206058
GO:0071837	HMG box domain binding	molecular_function	6	Pou3f3	1	256	16	17887	0.206058
GO:0030950	establishment or maintenance of actin cytoskeleton polarity	biological_process	8	Rnd1	1	256	16	17887	0.206058
GO:0045648	positive regulation of erythrocyte differentiation	biological_process	9	Inhba	1	256	16	17887	0.206058
GO:0001530	lipopolysaccharide binding	molecular_function	5	Selp	1	256	16	17887	0.206058
GO:0050966	detection of mechanical stimulus involved in sensory perception of pain	biological_process	7	LOC103694905	1	256	16	17887	0.206058
GO:0102568	phospholipase A2 activity consuming 1,2-dioleoylphosphatidylethanolamine)	molecular_function	7	Pla2g2a	1	256	16	17887	0.206058
GO:0032924	activin receptor signaling pathway	biological_process	8	Inhba	1	256	16	17887	0.206058
GO:0042923	neuropeptide binding	molecular_function	6	Sstr1	1	256	16	17887	0.206058
GO:0051899	membrane depolarization	biological_process	6	Scn3b	1	256	16	17887	0.206058
GO:0046597	negative regulation of viral entry into host cell	biological_process	10	Gsn	1	256	16	17887	0.206058
GO:0001502	cartilage condensation	biological_process	4	Ror2	1	256	16	17887	0.206058
GO:0022011	myelination in peripheral nervous system	biological_process	7	Ntrk2	1	256	16	17887	0.206058
GO:0071901	negative regulation of protein serine/threonine kinase activity	biological_process	12	Pkib	1	256	16	17887	0.206058
GO:0045178	basal part of cell	cellular_component	4	Cldn11	1	256	16	17887	0.206058
GO:0031954	positive regulation of protein autophosphorylation	biological_process	11	Gpnmb	1	256	16	17887	0.206058
GO:0043950	positive regulation of cAMP-mediated signaling	biological_process	10	Olr59	1	256	16	17887	0.206058
GO:0046928	regulation of neurotransmitter secretion	biological_process	6	Ntrk2	1	256	16	17887	0.206058
GO:0010759	positive regulation of macrophage chemotaxis	biological_process	9	Ccl2	1	256	16	17887	0.206058
GO:0048240	sperm capacitation	biological_process	5	Cftr	1	256	16	17887	0.206058
GO:0045109	intermediate filament organization	biological_process	8	Tchh	1	256	16	17887	0.206058
GO:0045638	negative regulation of myeloid cell differentiation	biological_process	8	Zbtb16	1	256	16	17887	0.206058
GO:0030742	GTP-dependent protein binding	molecular_function	5	Gch1	1	256	16	17887	0.206058
GO:0102567	phospholipase A2 activity (consuming 1,2-dipalmitoylphosphatidylcholine)	molecular_function	7	Pla2g2a	1	256	16	17887	0.206058
GO:0019001	guanyl nucleotide binding	molecular_function	7	Gnat3	1	256	16	17887	0.206058
GO:0042752	regulation of circadian rhythm	biological_process	5	Adcy1;Ppargc1a	2	256	59	17887	0.206734
GO:0070373	negative regulation of ERK1 and ERK2 cascade	biological_process	12	Wnk2;Lif	2	256	59	17887	0.206734
GO:0030900	forebrain development	biological_process	5	Ppargc1a;Sstr1	2	256	59	17887	0.206734
GO:0032092	positive regulation of protein binding	biological_process	7	Add2;Wnt5a	2	256	59	17887	0.206734
GO:0045732	positive regulation of protein catabolic process	biological_process	8	Wnt5a;C4bpa	2	256	59	17887	0.206734
GO:0005506	iron ion binding	molecular_function	8	Aox3;Lcn2;Cdo1;Cyp2e1	4	256	164	17887	0.208696
GO:0018108	peptidyl-tyrosine phosphorylation	biological_process	10	Erbb4;Ror2;Ntrk2	3	256	110	17887	0.208881
GO:0051592	response to calcium ion	biological_process	7	Il6;Thbs1	2	256	60	17887	0.211979
GO:0006958	complement activation, classical pathway	biological_process	6	AABR07065814;C1s	2	256	60	17887	0.211979
GO:0050679	positive regulation of epithelial cell proliferation	biological_process	8	Wnt5a;Il6	2	256	61	17887	0.217236
GO:0002244	hematopoietic progenitor cell differentiation	biological_process	6	Fst;Inhba	2	256	61	17887	0.217236
GO:0034605	cellular response to heat	biological_process	6	Scara5;Hmox1	2	256	61	17887	0.217236
GO:0043154	negative regulation of cysteine-type endopeptidase activity involved in apoptotic process	biological_process	10	Thbs1;Il6	2	256	61	17887	0.217236
GO:0071397	cellular response to cholesterol	biological_process	9	Inhba	1	256	17	17887	0.217431
GO:0001678	cellular glucose homeostasis	biological_process	9	Klf15	1	256	17	17887	0.217431
GO:0019229	regulation of vasoconstriction	biological_process	9	Atp1a2	1	256	17	17887	0.217431
GO:0036094	small molecule binding	molecular_function	4	Lcn2	1	256	17	17887	0.217431
GO:0017134	fibroblast growth factor binding	molecular_function	6	Thbs1	1	256	17	17887	0.217431
GO:0035729	cellular response to hepatocyte growth factor stimulus	biological_process	8	Il6	1	256	17	17887	0.217431
GO:0044389	ubiquitin-like protein ligase binding	molecular_function	6	Ptprn	1	256	17	17887	0.217431
GO:0043122	regulation of I-kappaB kinase/NF-kappaB signaling	biological_process	9	Wnt5a	1	256	17	17887	0.217431
GO:0010596	negative regulation of endothelial cell migration	biological_process	10	Thbs1	1	256	17	17887	0.217431
GO:0034237	protein kinase A regulatory subunit binding	molecular_function	6	Ryr2	1	256	17	17887	0.217431
GO:0046716	muscle cell cellular homeostasis	biological_process	5	Il6	1	256	17	17887	0.217431
GO:0030850	prostate gland development	biological_process	6	Gli1	1	256	17	17887	0.217431
GO:0004675	transmembrane receptor protein serine/threonine kinase activity	molecular_function	9	Ntrk2	1	256	17	17887	0.217431
GO:2000649	regulation of sodium ion transmembrane transporter activity	biological_process	8	Scn3b	1	256	17	17887	0.217431
GO:0036342	post-anal tail morphogenesis	biological_process	5	Wnt5a	1	256	17	17887	0.217431
GO:0046914	transition metal ion binding	molecular_function	7	Tchh	1	256	17	17887	0.217431
GO:0060324	face development	biological_process	5	Wnt5a	1	256	17	17887	0.217431
GO:0002092	positive regulation of receptor internalization	biological_process	8	Sele	1	256	17	17887	0.217431
GO:0060041	retina development in camera-type eye	biological_process	5	Ntrk2;Lamc3	2	256	62	17887	0.222505
GO:0003779	actin binding	molecular_function	6	Sptb;Ablim2;Add2;Fam107a;Gsn;Myh7	6	256	285	17887	0.225053
GO:0031410	cytoplasmic vesicle	cellular_component	6	Gpnmb;Avpr1a;Ptprn;Atp7b;Lcn2;Add2;Prss39;Gch1	8	256	405	17887	0.225468
GO:0051015	actin filament binding	molecular_function	7	Myh7;Sptb;Add2;Gsn	4	256	170	17887	0.226754
GO:0043204	perikaryon	cellular_component	5	Ptprn;Ntrk2;Ccl2	3	256	115	17887	0.227577
GO:0001822	kidney development	biological_process	6	Pou3f3;Pax8;Has2	3	256	115	17887	0.227577
GO:0007179	transforming growth factor beta receptor signaling pathway	biological_process	8	Col3a1;Ccl2	2	256	63	17887	0.227784
GO:0006469	negative regulation of protein kinase activity	biological_process	11	Pkib;Il6	2	256	63	17887	0.227784
GO:0071280	cellular response to copper ion	biological_process	8	Mt2A	1	256	18	17887	0.228642
GO:0010001	glial cell differentiation	biological_process	6	Klf15	1	256	18	17887	0.228642
GO:0090050	positive regulation of cell migration involved in sprouting angiogenesis	biological_process	12	Hmox1	1	256	18	17887	0.228642
GO:0035108	limb morphogenesis	biological_process	6	Wnt5a	1	256	18	17887	0.228642
GO:0034622	cellular protein-containing complex assembly	biological_process	7	Ric3	1	256	18	17887	0.228642
GO:1901653	cellular response to peptide	biological_process	8	Klf15	1	256	18	17887	0.228642
GO:0007413	axonal fasciculation	biological_process	6	Crtac1	1	256	18	17887	0.228642
GO:0004709	MAP kinase kinase kinase activity	molecular_function	9	Map3k6	1	256	18	17887	0.228642
GO:0061077	chaperone-mediated protein folding	biological_process	5	Fkbp5	1	256	18	17887	0.228642
GO:0046688	response to copper ion	biological_process	7	Atp7b	1	256	18	17887	0.228642
GO:0005242	inward rectifier potassium channel activity	molecular_function	10	Kcnj4	1	256	18	17887	0.228642
GO:0045216	cell-cell junction organization	biological_process	6	Cldn1	1	256	18	17887	0.228642
GO:0097503	sialylation	biological_process	7	St6galnac1	1	256	18	17887	0.228642
GO:0016922	nuclear receptor binding	molecular_function	8	Ppargc1a	1	256	18	17887	0.228642
GO:0021772	olfactory bulb development	biological_process	5	Crtac1	1	256	18	17887	0.228642
GO:0051770	positive regulation of nitric-oxide synthase biosynthetic process	biological_process	9	Ccl2	1	256	18	17887	0.228642
GO:0008139	nuclear localization sequence binding	molecular_function	7	LOC100359600	1	256	18	17887	0.228642
GO:0005229	intracellular calcium activated chloride channel activity	molecular_function	7	Clca1	1	256	18	17887	0.228642
GO:0032332	positive regulation of chondrocyte differentiation	biological_process	8	Zbtb16	1	256	18	17887	0.228642
GO:0044849	estrous cycle	biological_process	5	Has2	1	256	18	17887	0.228642
GO:0016327	apicolateral plasma membrane	cellular_component	5	Krt8	1	256	18	17887	0.228642
GO:0030658	transport vesicle membrane	cellular_component	7	Ptprn	1	256	18	17887	0.228642
GO:0048265	response to pain	biological_process	6	Gch1	1	256	18	17887	0.228642
GO:0048260	positive regulation of receptor-mediated endocytosis	biological_process	9	Serpine1	1	256	18	17887	0.228642
GO:0032956	regulation of actin cytoskeleton organization	biological_process	7	Rnd1;Fam107a	2	256	64	17887	0.233072
GO:0000278	mitotic cell cycle	biological_process	5	Tubb6;Tuba8;Gem	3	256	117	17887	0.235144
GO:0034599	cellular response to oxidative stress	biological_process	6	Slc7a11;Ppargc1a	2	256	65	17887	0.238367
GO:0030307	positive regulation of cell growth	biological_process	7	Avpr1a;Slc25a33	2	256	65	17887	0.238367
GO:0071363	cellular response to growth factor stimulus	biological_process	7	Thbs1;Angpt2	2	256	65	17887	0.238367
GO:0008637	apoptotic mitochondrial changes	biological_process	7	Sod2	1	256	19	17887	0.239693
GO:0006259	DNA metabolic process	biological_process	7	Dnase2b	1	256	19	17887	0.239693
GO:0030301	cholesterol transport	biological_process	9	Cftr	1	256	19	17887	0.239693
GO:0051019	mitogen-activated protein kinase binding	molecular_function	8	Gch1	1	256	19	17887	0.239693
GO:0061436	establishment of skin barrier	biological_process	10	Cldn1	1	256	19	17887	0.239693
GO:0010469	regulation of signaling receptor activity	biological_process	8	Serpine1	1	256	19	17887	0.239693
GO:0032148	activation of protein kinase B activity	biological_process	13	Wnt5a	1	256	19	17887	0.239693
GO:0019956	chemokine binding	molecular_function	6	Cxcr1	1	256	19	17887	0.239693
GO:0032757	positive regulation of interleukin-8 production	biological_process	8	Serpine1	1	256	19	17887	0.239693
GO:0019934	cGMP-mediated signaling	biological_process	8	Nppa	1	256	19	17887	0.239693
GO:0099175	regulation of postsynapse organization	biological_process	8	Wnt5a	1	256	19	17887	0.239693
GO:0050431	transforming growth factor beta binding	molecular_function	6	Thbs1	1	256	19	17887	0.239693
GO:0008483	transaminase activity	molecular_function	6	Bcat1	1	256	19	17887	0.239693
GO:0004993	G protein-coupled serotonin receptor activity	molecular_function	8	LOC103694905	1	256	19	17887	0.239693
GO:0050804	modulation of chemical synaptic transmission	biological_process	8	Slc7a11;Adcy1	2	256	66	17887	0.243668
GO:0007224	smoothened signaling pathway	biological_process	6	Ror2;Gli1	2	256	66	17887	0.243668
GO:0003924	GTPase activity	molecular_function	9	Gnat3;Rnd1;Gch1;Gem;Tuba8;Tubb6	6	256	294	17887	0.246076
GO:0006813	potassium ion transport	biological_process	9	Atp1a2;Kcnj4;Kcna6	3	256	120	17887	0.246576
GO:0016757	transferase activity, transferring glycosyl groups	molecular_function	5	Has2;Galnt14;St6galnac1;Gxylt2	4	256	177	17887	0.2483
GO:0009791	post-embryonic development	biological_process	4	Scn9a;Sod2	2	256	67	17887	0.248974
GO:0007271	synaptic transmission, cholinergic	biological_process	10	Ric3	1	256	20	17887	0.250586
GO:1900182	positive regulation of protein localization to nucleus	biological_process	9	Lif	1	256	20	17887	0.250586
GO:1904659	glucose transmembrane transport	biological_process	11	Slc2a4	1	256	20	17887	0.250586
GO:1900273	positive regulation of long-term synaptic potentiation	biological_process	9	Adcy1	1	256	20	17887	0.250586
GO:0006885	regulation of pH	biological_process	10	Slc26a4	1	256	20	17887	0.250586
GO:0007187	G protein-coupled receptor signaling pathway, coupled to cyclic nucleotide second messenger	biological_process	6	LOC103694905	1	256	20	17887	0.250586
GO:0031435	mitogen-activated protein kinase kinase kinase binding	molecular_function	8	Ror2	1	256	20	17887	0.250586
GO:0048821	erythrocyte development	biological_process	7	Slc4a1	1	256	20	17887	0.250586
GO:0008373	sialyltransferase activity	molecular_function	6	St6galnac1	1	256	20	17887	0.250586
GO:0005540	hyaluronic acid binding	molecular_function	6	Cemip	1	256	20	17887	0.250586
GO:0001556	oocyte maturation	biological_process	5	Ereg	1	256	20	17887	0.250586
GO:0005328	neurotransmitter:sodium symporter activity	molecular_function	5	Slc6a7	1	256	20	17887	0.250586
GO:0061608	nuclear import signal receptor activity	molecular_function	5	LOC100359600	1	256	20	17887	0.250586
GO:0031683	G-protein beta/gamma-subunit complex binding	molecular_function	5	Gnat3	1	256	20	17887	0.250586
GO:0031018	endocrine pancreas development	biological_process	5	Il6	1	256	20	17887	0.250586
GO:0019825	oxygen binding	molecular_function	5	Sod2	1	256	20	17887	0.250586
GO:0006820	anion transport	biological_process	7	Slc4a1	1	256	20	17887	0.250586
GO:0001968	fibronectin binding	molecular_function	5	Thbs1	1	256	20	17887	0.250586
GO:0090190	positive regulation of branching involved in ureteric bud morphogenesis	biological_process	10	Pax8	1	256	20	17887	0.250586
GO:0007283	spermatogenesis	biological_process	7	Cldn11;Gli1;Pmfbp1;Sstr1;Bmp8b;Tmem119	6	256	296	17887	0.250825
GO:0005856	cytoskeleton	cellular_component	6	Acta1;S100a8;Tuba8;Tubb6;Sptb;Acta2;Slc7a11;Add2;Fam107a;Gsn	10	256	544	17887	0.253795
GO:0071805	potassium ion transmembrane transport	biological_process	10	Kcnj4;Kcna6;Trpm5	3	256	122	17887	0.254245
GO:0099056	integral component of presynaptic membrane	cellular_component	6	Erbb4;LOC103694905	2	256	68	17887	0.254284
GO:0051291	protein heterooligomerization	biological_process	8	Gch1;Cldn1	2	256	69	17887	0.259596
GO:0005262	calcium channel activity	molecular_function	8	Ryr2;Trpc4	2	256	69	17887	0.259596
GO:0006357	regulation of transcription by RNA polymerase II	biological_process	9	Pou3f3;Inhba;Tef;Ankrd1;Etv4;Foxs1;Sod2;Klf15	8	256	423	17887	0.260916
GO:0019957	C-C chemokine binding	molecular_function	7	Cxcr1	1	256	21	17887	0.261324
GO:0006695	cholesterol biosynthetic process	biological_process	9	Cftr	1	256	21	17887	0.261324
GO:0006953	acute-phase response	biological_process	8	Il6	1	256	21	17887	0.261324
GO:2000379	positive regulation of reactive oxygen species metabolic process	biological_process	8	Thbs1	1	256	21	17887	0.261324
GO:0045921	positive regulation of exocytosis	biological_process	8	Cftr	1	256	21	17887	0.261324
GO:0071385	cellular response to glucocorticoid stimulus	biological_process	9	Fam107a	1	256	21	17887	0.261324
GO:0055010	ventricular cardiac muscle tissue morphogenesis	biological_process	8	Myh7	1	256	21	17887	0.261324
GO:0046849	bone remodeling	biological_process	5	Il6	1	256	21	17887	0.261324
GO:0005771	multivesicular body	cellular_component	9	Slc2a4	1	256	21	17887	0.261324
GO:0005104	fibroblast growth factor receptor binding	molecular_function	7	Flrt2	1	256	21	17887	0.261324
GO:0030574	collagen catabolic process	biological_process	5	Mmp2	1	256	21	17887	0.261324
GO:0044183	protein folding chaperone	molecular_function	3	Ric3	1	256	21	17887	0.261324
GO:0005184	neuropeptide hormone activity	molecular_function	8	Nppa	1	256	21	17887	0.261324
GO:0005539	glycosaminoglycan binding	molecular_function	5	Egflam	1	256	21	17887	0.261324
GO:0008023	transcription elongation factor complex	cellular_component	4	Aff3	1	256	21	17887	0.261324
GO:0010035	response to inorganic substance	biological_process	5	Avpr1a	1	256	21	17887	0.261324
GO:0009190	cyclic nucleotide biosynthetic process	biological_process	10	Adcy1	1	256	21	17887	0.261324
GO:0034341	response to interferon-gamma	biological_process	7	Gch1	1	256	21	17887	0.261324
GO:0006812	cation transport	biological_process	7	Atp7b;Trpm5	2	256	70	17887	0.264909
GO:0000165	MAPK cascade	biological_process	11	Scg2;Map3k6	2	256	70	17887	0.264909
GO:0060326	cell chemotaxis	biological_process	6	Defb3;Cxcr1	2	256	70	17887	0.264909
GO:0043547	positive regulation of GTPase activity	biological_process	8	Wnt5a;Ccl9;Ccl2;Ccl7;Ccl12	5	256	242	17887	0.266239
GO:0016605	PML body	cellular_component	8	Zbtb16;Ppargc1a	2	256	71	17887	0.270222
GO:0008144	drug binding	molecular_function	4	Dhfr;Atp1a2	2	256	71	17887	0.270222
GO:0045840	positive regulation of mitotic nuclear division	biological_process	9	Ereg	1	256	22	17887	0.271908
GO:0033017	sarcoplasmic reticulum membrane	cellular_component	6	Ryr2	1	256	22	17887	0.271908
GO:0030878	thyroid gland development	biological_process	7	Pax8	1	256	22	17887	0.271908
GO:0005251	delayed rectifier potassium channel activity	molecular_function	10	Kcna6	1	256	22	17887	0.271908
GO:0070527	platelet aggregation	biological_process	7	Slc7a11	1	256	22	17887	0.271908
GO:0016849	phosphorus-oxygen lyase activity	molecular_function	5	Adcy1	1	256	22	17887	0.271908
GO:0050482	arachidonic acid secretion	biological_process	9	Pla2g2a	1	256	22	17887	0.271908
GO:0004129	cytochrome-c oxidase activity	molecular_function	6	Cox8b	1	256	22	17887	0.271908
GO:0070412	R-SMAD binding	molecular_function	6	Ankrd1	1	256	22	17887	0.271908
GO:0001937	negative regulation of endothelial cell proliferation	biological_process	9	Thbs1	1	256	22	17887	0.271908
GO:0014911	positive regulation of smooth muscle cell migration	biological_process	9	Has2	1	256	22	17887	0.271908
GO:0016126	sterol biosynthetic process	biological_process	8	Hmgcs2	1	256	22	17887	0.271908
GO:0007631	feeding behavior	biological_process	4	Ntrk2	1	256	22	17887	0.271908
GO:0002053	positive regulation of mesenchymal cell proliferation	biological_process	8	Wnt5a	1	256	22	17887	0.271908
GO:0005520	insulin-like growth factor binding	molecular_function	6	Esm1	1	256	22	17887	0.271908
GO:0007178	transmembrane receptor protein serine/threonine kinase signaling pathway	biological_process	7	Ntrk2	1	256	22	17887	0.271908
GO:2001238	positive regulation of extrinsic apoptotic signaling pathway	biological_process	10	Tnfrsf12a	1	256	22	17887	0.271908
GO:0051233	spindle midzone	cellular_component	6	Gem	1	256	22	17887	0.271908
GO:0050806	positive regulation of synaptic transmission	biological_process	8	Ccl2	1	256	22	17887	0.271908
GO:0017080	sodium channel regulator activity	molecular_function	5	Scn3b	1	256	22	17887	0.271908
GO:0008652	cellular amino acid biosynthetic process	biological_process	9	Bcat1	1	256	22	17887	0.271908
GO:0016209	antioxidant activity	molecular_function	3	S100a8	1	256	22	17887	0.271908
GO:0012506	vesicle membrane	cellular_component	5	Slc2a4	1	256	22	17887	0.271908
GO:0010667	negative regulation of cardiac muscle cell apoptotic process	biological_process	12	Pax8	1	256	22	17887	0.271908
GO:0004860	protein kinase inhibitor activity	molecular_function	7	Pkib	1	256	22	17887	0.271908
GO:0003712	transcription coregulator activity	molecular_function	4	Ppargc1a;Ankrd1	2	256	72	17887	0.275535
GO:0021987	cerebral cortex development	biological_process	5	Col3a1;Ntrk2	2	256	72	17887	0.275535
GO:0043524	negative regulation of neuron apoptotic process	biological_process	10	Hmox1;Ppargc1a;Ntrk2	3	256	128	17887	0.277437
GO:0005930	axoneme	cellular_component	6	Gli1;Gnat3	2	256	73	17887	0.280845
GO:0043627	response to estrogen	biological_process	4	Hmox1;Ptprn	2	256	73	17887	0.280845
GO:0002250	adaptive immune response	biological_process	5	Lax1;Arg1	2	256	73	17887	0.280845
GO:0046718	viral entry into host cell	biological_process	9	Cldn1	1	256	23	17887	0.282342
GO:0021537	telencephalon development	biological_process	5	Avpr1a	1	256	23	17887	0.282342
GO:0060612	adipose tissue development	biological_process	7	Ppargc1a	1	256	23	17887	0.282342
GO:0070830	bicellular tight junction assembly	biological_process	9	Cldn1	1	256	23	17887	0.282342
GO:0006693	prostaglandin metabolic process	biological_process	10	Akr1c19	1	256	23	17887	0.282342
GO:0031369	translation initiation factor binding	molecular_function	5	Gch1	1	256	23	17887	0.282342
GO:0034394	protein localization to cell surface	biological_process	7	Ric3	1	256	23	17887	0.282342
GO:0008643	carbohydrate transport	biological_process	7	Slc2a4	1	256	23	17887	0.282342
GO:0016493	C-C chemokine receptor activity	molecular_function	9	Cxcr1	1	256	23	17887	0.282342
GO:0030687	preribosome, large subunit precursor	cellular_component	6	Ebna1bp2	1	256	23	17887	0.282342
GO:0003281	ventricular septum development	biological_process	6	Pax8	1	256	23	17887	0.282342
GO:0051537	2 iron, 2 sulfur cluster binding	molecular_function	6	Aox3	1	256	23	17887	0.282342
GO:0016339	calcium-dependent cell-cell adhesion via plasma membrane cell adhesion molecules	biological_process	7	Selp	1	256	23	17887	0.282342
GO:0048741	skeletal muscle fiber development	biological_process	9	Acta1	1	256	23	17887	0.282342
GO:0016324	apical plasma membrane	cellular_component	5	Gnat3;Cldn1;Slc26a4;Osmr;Cftr	5	256	249	17887	0.285421
GO:0030165	PDZ domain binding	molecular_function	6	Kcnj4;Cftr	2	256	74	17887	0.286153
GO:0006874	cellular calcium ion homeostasis	biological_process	11	Ryr2;Ccl2	2	256	74	17887	0.286153
GO:0000981	DNA-binding transcription factor activity, RNA polymerase II-specific	molecular_function	5	Heyl;Foxs1;Gli1;Etv4;Klf15	5	256	251	17887	0.29095
GO:0001503	ossification	biological_process	4	Col1a1;Tmem119	2	256	75	17887	0.291456
GO:0000187	activation of MAPK activity	biological_process	13	Thbs1;Wnt5a	2	256	75	17887	0.291456
GO:0090630	activation of GTPase activity	biological_process	9	Sgsm1;Wnt5a	2	256	75	17887	0.291456
GO:0005267	potassium channel activity	molecular_function	8	Kcna6;Trpm5	2	256	75	17887	0.291456
GO:0001669	acrosomal vesicle	cellular_component	9	Prss39;Gnat3	2	256	75	17887	0.291456
GO:0007189	adenylate cyclase-activating G protein-coupled receptor signaling pathway	biological_process	8	Adcy1;Adrb3	2	256	75	17887	0.291456
GO:0050853	B cell receptor signaling pathway	biological_process	8	Cd79a;AABR07065814	2	256	75	17887	0.291456
GO:0045807	positive regulation of endocytosis	biological_process	8	Wnt5a	1	256	24	17887	0.292626
GO:0002486	antigen processing and presentation of endogenous peptide antigen via MHC class I via ER pathway, TAP-independent	biological_process	9	AABR07044397	1	256	24	17887	0.292626
GO:0021983	pituitary gland development	biological_process	7	Gli1	1	256	24	17887	0.292626
GO:0007528	neuromuscular junction development	biological_process	6	Tnc	1	256	24	17887	0.292626
GO:0031226	intrinsic component of plasma membrane	cellular_component	5	Trem2	1	256	24	17887	0.292626
GO:0048147	negative regulation of fibroblast proliferation	biological_process	8	Sod2	1	256	24	17887	0.292626
GO:0014003	oligodendrocyte development	biological_process	7	Gsn	1	256	24	17887	0.292626
GO:0045765	regulation of angiogenesis	biological_process	7	Tnfrsf12a	1	256	24	17887	0.292626
GO:0005246	calcium channel regulator activity	molecular_function	6	Gem	1	256	24	17887	0.292626
GO:0045499	chemorepellent activity	molecular_function	7	Flrt2	1	256	24	17887	0.292626
GO:0042246	tissue regeneration	biological_process	6	Gsn	1	256	24	17887	0.292626
GO:0046697	decidualization	biological_process	5	Lif	1	256	24	17887	0.292626
GO:0030511	positive regulation of transforming growth factor beta receptor signaling pathway	biological_process	10	Thbs1	1	256	24	17887	0.292626
GO:0007257	activation of JUN kinase activity	biological_process	14	Wnt5a	1	256	24	17887	0.292626
GO:0032588	trans-Golgi network membrane	cellular_component	8	Atp7b	1	256	24	17887	0.292626
GO:0002476	antigen processing and presentation of endogenous peptide antigen via MHC class Ib	biological_process	7	AABR07044397	1	256	24	17887	0.292626
GO:0007613	memory	biological_process	5	LOC103694905;Ppp1r1b	2	256	76	17887	0.296755
GO:0030424	axon	cellular_component	6	Scn7a;Ntrk2;Ptprn;Scn9a;Ror2;Kcna6	6	256	315	17887	0.297096
GO:0001726	ruffle	cellular_component	6	Tnfrsf12a;Gsn	2	256	77	17887	0.302048
GO:0030334	regulation of cell migration	biological_process	7	Erbb4;Rnd1	2	256	77	17887	0.302048
GO:0009653	anatomical structure morphogenesis	biological_process	4	Foxs1	1	256	25	17887	0.302764
GO:0008395	steroid hydroxylase activity	molecular_function	6	Cyp2e1	1	256	25	17887	0.302764
GO:0032967	positive regulation of collagen biosynthetic process	biological_process	8	Ccl2	1	256	25	17887	0.302764
GO:0061844	antimicrobial humoral immune response mediated by antimicrobial peptide	biological_process	7	S100a9	1	256	25	17887	0.302764
GO:0035902	response to immobilization stress	biological_process	5	Sod2	1	256	25	17887	0.302764
GO:0060828	regulation of canonical Wnt signaling pathway	biological_process	9	Ror2	1	256	25	17887	0.302764
GO:0005790	smooth endoplasmic reticulum	cellular_component	7	Ryr2	1	256	25	17887	0.302764
GO:0046835	carbohydrate phosphorylation	biological_process	8	Pfkfb1	1	256	25	17887	0.302764
GO:0001974	blood vessel remodeling	biological_process	5	Lif	1	256	25	17887	0.302764
GO:0004623	phospholipase A2 activity	molecular_function	8	Pla2g2a	1	256	25	17887	0.302764
GO:0008198	ferrous iron binding	molecular_function	9	Cdo1	1	256	25	17887	0.302764
GO:0045089	positive regulation of innate immune response	biological_process	8	Ereg	1	256	25	17887	0.302764
GO:0002102	podosome	cellular_component	4	Gsn	1	256	25	17887	0.302764
GO:0033189	response to vitamin A	biological_process	9	Arg1	1	256	25	17887	0.302764
GO:0007186	G protein-coupled receptor signaling pathway	biological_process	5	Sstr1;LOC290595;LOC103694905;Adrb3;Ccl7;Ffar3;Olr59;Ccl12;Ccl2;Avpr1a;Areg;Cxcr1;Gnat3;Ccl9	14	256	831	17887	0.303559
GO:0051973	positive regulation of telomerase activity	biological_process	8	Pkib	1	256	26	17887	0.312756
GO:0048514	blood vessel morphogenesis	biological_process	6	Angpt2	1	256	26	17887	0.312756
GO:0097192	extrinsic apoptotic signaling pathway in absence of ligand	biological_process	6	Lcn2	1	256	26	17887	0.312756
GO:0042771	intrinsic apoptotic signaling pathway in response to DNA damage by p53 class mediator	biological_process	8	Bcl3	1	256	26	17887	0.312756
GO:0042738	exogenous drug catabolic process	biological_process	7	Cyp2e1	1	256	26	17887	0.312756
GO:0048018	receptor ligand activity	molecular_function	6	Gpnmb	1	256	26	17887	0.312756
GO:0034614	cellular response to reactive oxygen species	biological_process	7	Mmp2	1	256	26	17887	0.312756
GO:0030073	insulin secretion	biological_process	11	Ptprn	1	256	26	17887	0.312756
GO:0048843	negative regulation of axon extension involved in axon guidance	biological_process	9	Wnt5a	1	256	26	17887	0.312756
GO:0030001	metal ion transport	biological_process	8	Atp7b	1	256	27	17887	0.322607
GO:0002218	activation of innate immune response	biological_process	5	Mnda	1	256	27	17887	0.322607
GO:0042755	eating behavior	biological_process	5	Adrb3	1	256	27	17887	0.322607
GO:0035025	positive regulation of Rho protein signal transduction	biological_process	12	Col3a1	1	256	27	17887	0.322607
GO:0006641	triglyceride metabolic process	biological_process	9	Cyp2e1	1	256	27	17887	0.322607
GO:0016239	positive regulation of macroautophagy	biological_process	10	Hmox1	1	256	27	17887	0.322607
GO:0004864	protein phosphatase inhibitor activity	molecular_function	7	Ppp1r1b	1	256	27	17887	0.322607
GO:0006904	vesicle docking involved in exocytosis	biological_process	7	Cftr	1	256	27	17887	0.322607
GO:0060412	ventricular septum morphogenesis	biological_process	6	Heyl	1	256	27	17887	0.322607
GO:0006915	apoptotic process	biological_process	6	S100a8;Prune2;Gsn;Lcn2;Il24;Hmox1	6	256	327	17887	0.327144
GO:0043197	dendritic spine	cellular_component	7	Atp1a2;Myl7;Ntrk2	3	256	141	17887	0.328229
GO:0051087	chaperone binding	molecular_function	5	Cftr;Atp1a2	2	256	82	17887	0.328391
GO:0005179	hormone activity	molecular_function	7	Inhba;Nppa	2	256	82	17887	0.328391
GO:0007584	response to nutrient	biological_process	7	Col1a1;Aldh3a1	2	256	82	17887	0.328391
GO:0045892	negative regulation of transcription, DNA-templated	biological_process	9	Wnt5a;Zbtb16;Ankrd1;Heyl;Foxs1;Pou3f3;Ereg;Bcl3	8	256	456	17887	0.329644
GO:0005834	heterotrimeric G-protein complex	cellular_component	5	Gnat3	1	256	28	17887	0.332316
GO:0043014	alpha-tubulin binding	molecular_function	7	Ppargc1a	1	256	28	17887	0.332316
GO:0003009	skeletal muscle contraction	biological_process	8	Myh7	1	256	28	17887	0.332316
GO:1990573	potassium ion import across plasma membrane	biological_process	11	Atp1a2	1	256	28	17887	0.332316
GO:0045880	positive regulation of smoothened signaling pathway	biological_process	9	Gli1	1	256	28	17887	0.332316
GO:0050718	positive regulation of interleukin-1 beta secretion	biological_process	10	Wnt5a	1	256	28	17887	0.332316
GO:0001656	metanephros development	biological_process	7	Pax8	1	256	28	17887	0.332316
GO:0030016	myofibril	cellular_component	7	Myh7	1	256	28	17887	0.332316
GO:0045930	negative regulation of mitotic cell cycle	biological_process	8	Brinp2	1	256	28	17887	0.332316
GO:0005719	nuclear euchromatin	cellular_component	8	Ppargc1a	1	256	28	17887	0.332316
GO:0030534	adult behavior	biological_process	4	Slc7a11	1	256	28	17887	0.332316
GO:0051281	positive regulation of release of sequestered calcium ion into cytosol	biological_process	15	Cemip	1	256	28	17887	0.332316
GO:0009416	response to light stimulus	biological_process	6	Ntrk2	1	256	28	17887	0.332316
GO:0006094	gluconeogenesis	biological_process	9	Ppargc1a	1	256	28	17887	0.332316
GO:0045595	regulation of cell differentiation	biological_process	6	Lif	1	256	28	17887	0.332316
GO:0032212	positive regulation of telomere maintenance via telomerase	biological_process	12	Pkib	1	256	28	17887	0.332316
GO:0042110	T cell activation	biological_process	7	Il6	1	256	28	17887	0.332316
GO:0035458	cellular response to interferon-beta	biological_process	8	Mnda	1	256	28	17887	0.332316
GO:0035774	positive regulation of insulin secretion involved in cellular response to glucose stimulus	biological_process	12	Cftr	1	256	28	17887	0.332316
GO:0043066	negative regulation of apoptotic process	biological_process	9	Pou3f3;Bcl3;Thbs1;Sod2;Timp1;Wnt5a;Card14	7	256	396	17887	0.339454
GO:0016020	membrane	cellular_component	3	Cldn1;Tlr5;Has2;Scara5;Scn9a;Cox8b;Klrd1;Kcna6;Scn3b;Galnt14;Fmo3;Avpr1a;Ric3;Osmr;Shisa3;Tmprss11a;RGD1559482;Slc15a2;Gpnmb;Ffar3;Trpm5;Slco1a1;Adcy1;Atp1a2;Adtrp;RGD1562667;Gem;Areg;Doc2b;Sstr1;Fam107a;Slc2a4;AABR07044397;Pla2g2a;St6galnac1;Add2;Klri2;Slfn4;Ror2;Slc6a7;Nat8l;Ereg;Rprml;Pgf;F3;Pcdh7;Trpc4;LOC103694905;AABR07006278;Cftr;Ntrk2;Itgb8;S100a8;Cyp2e1;Selp;Tmem119;Kcnj4;Fmo6;Ms4a7;Aldh…	88	256	5902	17887	0.340264
GO:0008219	cell death	biological_process	4	Hmox1	1	256	29	17887	0.341887
GO:0048863	stem cell differentiation	biological_process	6	Lif	1	256	29	17887	0.341887
GO:0040018	positive regulation of multicellular organism growth	biological_process	8	Foxs1	1	256	29	17887	0.341887
GO:0045071	negative regulation of viral genome replication	biological_process	10	Oas1e	1	256	29	17887	0.341887
GO:0030901	midbrain development	biological_process	5	Wnt5a	1	256	29	17887	0.341887
GO:0001708	cell fate specification	biological_process	5	Tbx18	1	256	29	17887	0.341887
GO:0044344	cellular response to fibroblast growth factor stimulus	biological_process	8	Col1a1	1	256	29	17887	0.341887
GO:0034707	chloride channel complex	cellular_component	7	Cftr	1	256	29	17887	0.341887
GO:0008270	zinc ion binding	molecular_function	8	Timp1;S100a8;St18;Cpz;Fbxo40;Mt2A;Vat1l;Mmp2;S100a9;Gch1;Cpb2	11	256	661	17887	0.347967
GO:0051091	positive regulation of DNA-binding transcription factor activity	biological_process	6	Ppargc1a;Cytl1	2	256	86	17887	0.349273
GO:0001889	liver development	biological_process	7	Arg1;Sod2	2	256	86	17887	0.349273
GO:1990830	cellular response to leukemia inhibitory factor	biological_process	8	PCOLCE2;Sstr1	2	256	86	17887	0.349273
GO:0042605	peptide antigen binding	molecular_function	5	AABR07044397	1	256	30	17887	0.351321
GO:2000272	negative regulation of signaling receptor activity	biological_process	9	Ppargc1a	1	256	30	17887	0.351321
GO:0004857	enzyme inhibitor activity	molecular_function	5	Timp1	1	256	30	17887	0.351321
GO:0030316	osteoclast differentiation	biological_process	8	Trem2	1	256	30	17887	0.351321
GO:0060076	excitatory synapse	cellular_component	4	Ntrk2	1	256	30	17887	0.351321
GO:0070507	regulation of microtubule cytoskeleton organization	biological_process	7	Fam107a	1	256	30	17887	0.351321
GO:0048856	anatomical structure development	biological_process	4	Ror2	1	256	30	17887	0.351321
GO:0009953	dorsal/ventral pattern formation	biological_process	6	Gli1	1	256	30	17887	0.351321
GO:0050772	positive regulation of axonogenesis	biological_process	10	Ntrk2	1	256	30	17887	0.351321
GO:0038023	signaling receptor activity	molecular_function	4	Folr2;Olr59;Itgb8	3	256	147	17887	0.351712
GO:0016787	hydrolase activity	molecular_function	4	Cpb2;Pla2g2a;Pfkfb1;Arg1;C1s;Cpvl;Gzmbl1;Prss39;Gzma;Adtrp;Cela3b;Prss22;Gzmbl3;Mmp2;Tmprss11a;Gch1;Idi1	17	256	1064	17887	0.354956
GO:0046777	protein autophosphorylation	biological_process	10	Wnk2;Ntrk2;Erbb4	3	256	148	17887	0.355619
GO:0070555	response to interleukin-1	biological_process	7	Sele	1	256	31	17887	0.360621
GO:0048786	presynaptic active zone	cellular_component	4	Ntrk2	1	256	31	17887	0.360621
GO:0043536	positive regulation of blood vessel endothelial cell migration	biological_process	11	Thbs1	1	256	31	17887	0.360621
GO:0060349	bone morphogenesis	biological_process	6	Has2	1	256	31	17887	0.360621
GO:0030216	keratinocyte differentiation	biological_process	8	Wnt5a	1	256	31	17887	0.360621
GO:0051020	GTPase binding	molecular_function	6	Ptprn	1	256	31	17887	0.360621
GO:0045214	sarcomere organization	biological_process	9	Krt8	1	256	31	17887	0.360621
GO:1904707	positive regulation of vascular smooth muscle cell proliferation	biological_process	9	Mmp2	1	256	31	17887	0.360621
GO:0051213	dioxygenase activity	molecular_function	5	Cdo1	1	256	31	17887	0.360621
GO:0019838	growth factor binding	molecular_function	5	Osmr	1	256	31	17887	0.360621
GO:0000977	RNA polymerase II regulatory region sequence-specific DNA binding	molecular_function	9	Tbx18;Heyl;Tef;Gli1;Klf15	5	256	279	17887	0.369759
GO:0086091	regulation of heart rate by cardiac conduction	biological_process	10	Scn3b	1	256	32	17887	0.369788
GO:0000186	activation of MAPKK activity	biological_process	13	Map3k6	1	256	32	17887	0.369788
GO:0006865	amino acid transport	biological_process	10	Slc7a11	1	256	32	17887	0.369788
GO:0001916	positive regulation of T cell mediated cytotoxicity	biological_process	8	AABR07044397	1	256	32	17887	0.369788
GO:0004553	hydrolase activity, hydrolyzing O-glycosyl compounds	molecular_function	6	Chia	1	256	32	17887	0.369788
GO:0051276	chromosome organization	biological_process	6	Gem	1	256	32	17887	0.369788
GO:0043209	myelin sheath	cellular_component	4	Gsn	1	256	32	17887	0.369788
GO:0042476	odontogenesis	biological_process	6	Inhba	1	256	32	17887	0.369788
GO:0000422	autophagy of mitochondrion	biological_process	7	Ppargc1a	1	256	32	17887	0.369788
GO:0005923	bicellular tight junction	cellular_component	6	Cldn11;Cldn1	2	256	90	17887	0.369932
GO:0045907	positive regulation of vasoconstriction	biological_process	10	Avpr1a	1	256	33	17887	0.378823
GO:0043278	response to morphine	biological_process	6	Ppp1r1b	1	256	33	17887	0.378823
GO:0031623	receptor internalization	biological_process	9	Cxcr1	1	256	33	17887	0.378823
GO:0040008	regulation of growth	biological_process	5	Fam107a	1	256	33	17887	0.378823
GO:0046326	positive regulation of glucose import	biological_process	10	Klf15	1	256	33	17887	0.378823
GO:0030501	positive regulation of bone mineralization	biological_process	8	Tmem119	1	256	33	17887	0.378823
GO:0009888	tissue development	biological_process	5	Lamc3	1	256	33	17887	0.378823
GO:0048565	digestive tract development	biological_process	6	Col3a1	1	256	33	17887	0.378823
GO:0007507	heart development	biological_process	6	Nppa;Col3a1;Sod2;Erbb4	4	256	218	17887	0.379973
GO:0006457	protein folding	biological_process	4	Nppa;Ric3	2	256	92	17887	0.380166
GO:0007264	small GTPase mediated signal transduction	biological_process	6	Hmox1;Rnd1	2	256	92	17887	0.380166
GO:0001707	mesoderm formation	biological_process	6	Inhba	1	256	34	17887	0.38773
GO:0007249	I-kappaB kinase/NF-kappaB signaling	biological_process	6	Bcl3	1	256	34	17887	0.38773
GO:0045786	negative regulation of cell cycle	biological_process	7	Inhba	1	256	34	17887	0.38773
GO:0071345	cellular response to cytokine stimulus	biological_process	7	Il6	1	256	34	17887	0.38773
GO:0008080	N-acetyltransferase activity	molecular_function	8	Nat8l	1	256	34	17887	0.38773
GO:2001237	negative regulation of extrinsic apoptotic signaling pathway	biological_process	10	Scg2	1	256	34	17887	0.38773
GO:0043491	protein kinase B signaling	biological_process	6	Adtrp	1	256	34	17887	0.38773
GO:0008017	microtubule binding	molecular_function	7	Gli1;S100a9;Mtus2;S100a8	4	256	221	17887	0.389692
GO:0007399	nervous system development	biological_process	6	Ror2;Ntrk2;Scn3b;Erbb4	4	256	221	17887	0.389692
GO:0043565	sequence-specific DNA binding	molecular_function	7	Tef;Foxs1;Pou3f3;Heyl;Pax8;Nkx2-8;Zbtb16;Etv4;Ppargc1a	9	256	551	17887	0.391124
GO:0008544	epidermis development	biological_process	6	Krt76	1	256	35	17887	0.39651
GO:0060173	limb development	biological_process	6	Slc7a11	1	256	35	17887	0.39651
GO:0051879	Hsp90 protein binding	molecular_function	6	Cyp2e1	1	256	35	17887	0.39651
GO:0030155	regulation of cell adhesion	biological_process	5	Gsn	1	256	35	17887	0.39651
GO:0071949	FAD binding	molecular_function	7	Aox3	1	256	35	17887	0.39651
GO:0001942	hair follicle development	biological_process	6	Inhba	1	256	35	17887	0.39651
GO:0050767	regulation of neurogenesis	biological_process	8	Heyl	1	256	35	17887	0.39651
GO:0002062	chondrocyte differentiation	biological_process	6	Cytl1	1	256	35	17887	0.39651
GO:0022857	transmembrane transporter activity	molecular_function	4	Slc2a4;Slc15a2;Slc7a11	3	256	159	17887	0.398324
GO:0006914	autophagy	biological_process	6	S100a9;S100a8	2	256	96	17887	0.400419
GO:0006836	neurotransmitter transport	biological_process	6	Slc6a7	1	256	36	17887	0.405164
GO:0005230	extracellular ligand-gated ion channel activity	molecular_function	8	Gabrp	1	256	36	17887	0.405164
GO:0098686	hippocampal mossy fiber to CA3 synapse	cellular_component	5	Adcy1	1	256	36	17887	0.405164
GO:0016712	oxidoreductase activity, acting on paired donors, with incorporation or reduction of molecular oxygen, reduced flavin or flavoprotein as one donor, and incorporation of one atom of oxygen	molecular_function	6	Cyp2e1	1	256	36	17887	0.405164
GO:0050890	cognition	biological_process	6	Fam107a	1	256	36	17887	0.405164
GO:0042273	ribosomal large subunit biogenesis	biological_process	6	Ebna1bp2	1	256	36	17887	0.405164
GO:0030833	regulation of actin filament polymerization	biological_process	8	Eln	1	256	36	17887	0.405164
GO:0032515	negative regulation of phosphoprotein phosphatase activity	biological_process	12	Ppp1r1b	1	256	36	17887	0.405164
GO:0042127	regulation of cell population proliferation	biological_process	6	Il6;Tnc;Slc7a11	3	256	161	17887	0.406015
GO:0005525	GTP binding	molecular_function	8	Gnat3;Tuba8;Gem;Gch1;Rnd1;Tubb6	6	256	360	17887	0.411184
GO:0030217	T cell differentiation	biological_process	8	Sstr1	1	256	37	17887	0.413694
GO:0032570	response to progesterone	biological_process	6	Ccl2	1	256	37	17887	0.413694
GO:0009058	biosynthetic process	biological_process	4	Aldh1l2	1	256	37	17887	0.413694
GO:0045668	negative regulation of osteoblast differentiation	biological_process	8	Areg	1	256	37	17887	0.413694
GO:0001975	response to amphetamine	biological_process	6	Ppp1r1b	1	256	37	17887	0.413694
GO:0008543	fibroblast growth factor receptor signaling pathway	biological_process	8	Flrt2	1	256	37	17887	0.413694
GO:0035176	social behavior	biological_process	5	Avpr1a	1	256	37	17887	0.413694
GO:0045773	positive regulation of axon extension	biological_process	8	Tnfrsf12a	1	256	37	17887	0.413694
GO:0008152	metabolic process	biological_process	3	Pfkfb1;Gch1	2	256	99	17887	0.415404
GO:0004713	protein tyrosine kinase activity	molecular_function	8	Erbb4;Ntrk2	2	256	99	17887	0.415404
GO:0005911	cell-cell junction	cellular_component	4	Trpc4;Krt8;Flrt2	3	256	164	17887	0.417496
GO:0030331	estrogen receptor binding	molecular_function	9	Ppargc1a	1	256	38	17887	0.422103
GO:0005254	chloride channel activity	molecular_function	8	Cftr	1	256	39	17887	0.430391
GO:0051209	release of sequestered calcium ion into cytosol	biological_process	8	Ryr2	1	256	39	17887	0.430391
GO:0030544	Hsp70 protein binding	molecular_function	6	Cyp2e1	1	256	39	17887	0.430391
GO:0032720	negative regulation of tumor necrosis factor production	biological_process	9	Gpnmb	1	256	39	17887	0.430391
GO:0019882	antigen processing and presentation	biological_process	4	AABR07044397	1	256	39	17887	0.430391
GO:0003755	peptidyl-prolyl cis-trans isomerase activity	molecular_function	6	Fkbp5	1	256	39	17887	0.430391
GO:0010718	positive regulation of epithelial to mesenchymal transition	biological_process	8	Col1a1	1	256	39	17887	0.430391
GO:1901216	positive regulation of neuron death	biological_process	8	Wnt5a	1	256	39	17887	0.430391
GO:0030178	negative regulation of Wnt signaling pathway	biological_process	9	Frzb	1	256	39	17887	0.430391
GO:0098978	glutamatergic synapse	cellular_component	4	Add2;Ppp1r1b;Wnt5a;Adcy1;Erbb4;Ntrk2	6	256	369	17887	0.434082
GO:0005737	cytoplasm	cellular_component	5	Myh7;Nat8l;Rnd1;Ppargc1a;Serpinb5;Arg1;Heyl;LOC100359600;Adcy1;Cftr;Aldh1l2;Gzmbl3;Cyp2e1;Acta2;Bcat1;Doc2b;Sod2;Gsn;Gch1;Ror2;Sstr1;Marco;Fam107a;Il6;Cldn1;S100a9;LOC498222;Nppa;Fkbp5;Fbxo40;Add2;Chia;Bcl3;Prune2;Clnk;Gnat3;Card14;Sptb;Aldh3a1;Pmfbp1;Wnk2;Cemip;Mt2A;Ccl2;Areg;Has2;Tubb6;Slc2a4;Inmt;Thbs1;Gli1;Col1a1;S100a8;Krt8;Tuba8;Ppp1r1b;Gzmbl1;Ankrd1;Ntrk2;Mtus2;Atp1a2;Frzb;Acta1;Dhfr	64	256	4368	17887	0.437952
GO:0001541	ovarian follicle development	biological_process	6	Inhba	1	256	40	17887	0.438562
GO:0014704	intercalated disc	cellular_component	6	Atp1a2	1	256	40	17887	0.438562
GO:0031648	protein destabilization	biological_process	6	Gsn	1	256	40	17887	0.438562
GO:0032729	positive regulation of interferon-gamma production	biological_process	8	Wnt5a	1	256	40	17887	0.438562
GO:0030136	clathrin-coated vesicle	cellular_component	8	Slc2a4	1	256	40	17887	0.438562
GO:0000413	protein peptidyl-prolyl isomerization	biological_process	11	Fkbp5	1	256	40	17887	0.438562
GO:0008289	lipid binding	molecular_function	4	Sec14l4;Bpifa1;Ffar3	3	256	170	17887	0.440235
GO:0070588	calcium ion transmembrane transport	biological_process	11	Ryr2;Trpc4	2	256	105	17887	0.444796
GO:0019899	enzyme binding	molecular_function	5	Cyp2e1;Ryr2;Sod2;Hmox1;Cftr	5	256	306	17887	0.446013
GO:0034446	substrate adhesion-dependent cell spreading	biological_process	8	Lamc3	1	256	41	17887	0.446615
GO:0098655	cation transmembrane transport	biological_process	8	Atp7b	1	256	41	17887	0.446615
GO:0021915	neural tube development	biological_process	6	Wnt5a	1	256	41	17887	0.446615
GO:0042645	mitochondrial nucleoid	cellular_component	4	Sod2	1	256	41	17887	0.446615
GO:0016853	isomerase activity	molecular_function	4	Idi1;Fkbp5	2	256	106	17887	0.449616
GO:0001755	neural crest cell migration	biological_process	8	Erbb4	1	256	42	17887	0.454553
GO:0035914	skeletal muscle cell differentiation	biological_process	6	Heyl	1	256	42	17887	0.454553
GO:1990841	promoter-specific chromatin binding	molecular_function	5	Ppargc1a	1	256	42	17887	0.454553
GO:0001786	phosphatidylserine binding	molecular_function	6	Thbs1	1	256	42	17887	0.454553
GO:0030133	transport vesicle	cellular_component	7	Syt13	1	256	42	17887	0.454553
GO:0030514	negative regulation of BMP signaling pathway	biological_process	11	Wnt5a	1	256	42	17887	0.454553
GO:0000166	nucleotide binding	molecular_function	5	Cftr;Atp7b;Tuba8;Acta1;Map3k6;Erbb4;Gnat3;Adcy1;Atp1a2;Ror2;Rnd1;Stk32b;Acta2;Myh7;Pfkfb1;Gem;Ntrk2;Tubb6;Gch1	19	256	1272	17887	0.457701
GO:0030139	endocytic vesicle	cellular_component	7	Ccl2	1	256	43	17887	0.462378
GO:0019905	syntaxin binding	molecular_function	6	Doc2b	1	256	43	17887	0.462378
GO:0030864	cortical actin cytoskeleton	cellular_component	8	Gsn	1	256	43	17887	0.462378
GO:0032993	protein-DNA complex	cellular_component	4	St18	1	256	43	17887	0.462378
GO:0032024	positive regulation of insulin secretion	biological_process	11	Doc2b	1	256	43	17887	0.462378
GO:0001227	DNA-binding transcription repressor activity, RNA polymerase II-specific	molecular_function	6	Foxs1;Heyl;Zbtb16	3	256	176	17887	0.462629
GO:0007605	sensory perception of sound	biological_process	8	Cemip;Col1a1	2	256	109	17887	0.463931
GO:0000226	microtubule cytoskeleton organization	biological_process	7	Tuba8;Tubb6	2	256	110	17887	0.468654
GO:0051092	positive regulation of NF-kappaB transcription factor activity	biological_process	7	Card14;Wnt5a	2	256	110	17887	0.468654
GO:0042220	response to cocaine	biological_process	6	Ppp1r1b	1	256	44	17887	0.470091
GO:0001558	regulation of cell growth	biological_process	6	Fam107a	1	256	44	17887	0.470091
GO:0030326	embryonic limb morphogenesis	biological_process	7	Wnt5a	1	256	44	17887	0.470091
GO:0046332	SMAD binding	molecular_function	5	Col3a1	1	256	44	17887	0.470091
GO:0003007	heart morphogenesis	biological_process	6	Flrt2	1	256	44	17887	0.470091
[truncated: 247 more rows]
