# Supplementary material for: Analysis of the Potential Relationship between Aging and Pulmonary Fibrosis Based on Transcriptome
Source: Life (Basel). 2022 Nov 23;12(12):1961. doi: 10.3390/life12121961 (PMC9788318; doi:10.3390/life12121961)
Supplement: Supplementary file 1 [file life-12-01961-s001.zip › Table S9-SA set KEGG enrichment Gene of Figur 4D.xlsx]

## Sheet: Sheet1
pathway_id	pathway_name	Genes	S gene number	TS gene number	B gene number	TB gene number	pvalue
4512	ECM-receptor interaction	Itga11;Itgb8;Lamc3;Thbs1;Tnc;Col1a1;Col6a1;LOC102554659;NEWGENE_621351;Thbs2	10	139	81	7091	3.47637e-06
4974	Protein digestion and absorption	Col3a1;Col6a1;NEWGENE_621351;LOC108348074;Col1a1;Col7a1;Cpb2;Eln;Atp1a2;Cela3b	10	139	88	7091	7.43363e-06
5146	Amoebiasis	Col3a1;LOC102554659;Adcy1;Lamc3;Col1a1;C9;NEWGENE_621351;Arg1;Il6;Serpinb10	10	139	93	7091	1.22425e-05
4933	AGE-RAGE signaling pathway in diabetic complications	Ccl2;Il6;Col3a1;Sele;Mmp2;Ccl12;NEWGENE_621351;F3;Col1a1;Serpine1	10	139	101	7091	2.54802e-05
5144	Malaria	Ccl12;Selp;Sele;Thbs1;Il6;Thbs2;Ccl2	7	139	49	7091	4.12911e-05
4151	PI3K-Akt signaling pathway	Ntrk2;Erbb4;Tnc;Itgb8;Pgf;Il6;Thbs2;Col1a1;Angpt2;Itga11;Areg;Lamc3;NEWGENE_621351;Osmr;LOC102554659;Ereg;Thbs1;Col6a1	18	139	331	7091	7.39411e-05
982	Drug metabolism - cytochrome P450	Fmo6;Fmo3;Aox3;Fmo2;Cyp2e1;Aldh3a1	6	139	51	7091	0.000444027
4510	Focal adhesion	Pgf;NEWGENE_621351;Myl7;Itga11;Thbs1;LOC102554659;Itgb8;Col1a1;Thbs2;Tnc;Lamc3;Col6a1	12	139	197	7091	0.000458276
4972	Pancreatic secretion	Pla2g2a;Clca1;Atp1a2;Adcy1;Cpb2;Cela3b;Ryr2;Cftr	8	139	98	7091	0.00063543
4657	IL-17 signaling pathway	S100a8;S100a9;Ccl2;Il6;Ccl12;Ccl7;Lcn2	7	139	92	7091	0.00209267
4610	Complement and coagulation cascades	Cpb2;F3;Serpine1;C9;C1s;C4bpa	6	139	75	7091	0.00338264
4060	Cytokine-cytokine receptor interaction	Ccl9;Cxcr1;Inhba;Osmr;Lif;Ccl7;Il24;Il6;Bmp8b;Ccl12;Tnfrsf12a;Ccl2	12	139	256	7091	0.00430117
4066	HIF-1 signaling pathway	Nppa;Serpine1;Il6;Angpt2;Hmox1;Timp1	6	139	99	7091	0.0128633
4668	TNF signaling pathway	Ccl2;Sele;Bcl3;Lif;Ccl12;Il6	6	139	108	7091	0.01906
1523	Antifolate resistance	Il6;Folr2;Dhfr	3	139	31	7091	0.0221964
5410	Hypertrophic cardiomyopathy (HCM)	Ryr2;Il6;Myh7;Itgb8;Itga11	5	139	85	7091	0.0252945
5414	Dilated cardiomyopathy (DCM)	Itga11;Ryr2;Myh7;Adcy1;Itgb8	5	139	88	7091	0.0288503
5165	Human papillomavirus infection	Lamc3;Heyl;Thbs2;Tnc;Col1a1;Thbs1;Itga11;Itgb8;LOC102554659;Wnt5a;NEWGENE_621351;Col6a1	12	139	334	7091	0.0304706
4926	Relaxin signaling pathway	Mmp2;Col1a1;Acta2;NEWGENE_621351;Adcy1;Col3a1	6	139	126	7091	0.0369866
5143	African trypanosomiasis	Nppa;Il6;Sele	3	139	38	7091	0.0377471
4024	cAMP signaling pathway	Adcy1;Sstr1;Gli1;Ryr2;Cftr;Nppa;Atp1a2;Ppp1r1b	8	139	197	7091	0.0393633
4918	Thyroid hormone synthesis	Pax8;Atp1a2;Slc26a4;Adcy1	4	139	69	7091	0.0459293
670	One carbon pool by folate	Aldh1l2;Dhfr	2	139	18	7091	0.047553
5142	Chagas disease (American trypanosomiasis)	Serpine1;Ccl2;Adcy1;Ccl12;Il6	5	139	101	7091	0.0478194
4115	p53 signaling pathway	Serpinb5;Serpine1;Sfn;Thbs1	4	139	71	7091	0.0501219
4978	Mineral absorption	Hmox1;Atp1a2;Mt2A	3	139	44	7091	0.0544904
4260	Cardiac muscle contraction	Atp1a2;Myh7;Ryr2;Cox8b	4	139	76	7091	0.0614931
4630	Jak-STAT signaling pathway	Osmr;Il6;Aox3;Lif;Il24;Il22ra2	6	139	143	7091	0.0615384
900	Terpenoid backbone biosynthesis	Idi1;Hmgcs2	2	139	22	7091	0.0682642
290	Valine, leucine and isoleucine biosynthesis	Bcat1	1	139	4	7091	0.0761494
790	Folate biosynthesis	Dhfr;Gch1	2	139	24	7091	0.0795413
280	Valine, leucine and isoleucine degradation	Aox3;Bcat1;Hmgcs2	3	139	52	7091	0.0813686
4923	Regulation of lipolysis in adipocytes	Adcy1;Nppa;Adrb3	3	139	54	7091	0.0888367
512	Mucin type O-glycan biosynthesis	St6galnac1;Galnt14	2	139	26	7091	0.0913494
4350	TGF-beta signaling pathway	Bmp8b;Fst;Thbs1;Inhba	4	139	93	7091	0.109233
4270	Vascular smooth muscle contraction	Adcy1;Acta2;Pla2g2a;Avpr1a;Nppa	5	139	130	7091	0.111511
4371	Apelin signaling pathway	Acta2;Adcy1;Ppargc1a;Serpine1;Ryr2	5	139	135	7091	0.125335
5020	Prion diseases	Il6;C9	2	139	33	7091	0.136062
4062	Chemokine signaling pathway	Ccl2;Cxcr1;Ccl7;Adcy1;Ccl9;Ccl12	6	139	178	7091	0.136412
4261	Adrenergic signaling in cardiomyocytes	Ryr2;Adcy1;Myh7;Scn7a;Atp1a2	5	139	139	7091	0.136939
4020	Calcium signaling pathway	Erbb4;Adcy1;LOC103694905;Adrb3;Ryr2;Avpr1a	6	139	179	7091	0.139006
350	Tyrosine metabolism	Aldh3a1;Aox3	2	139	34	7091	0.142795
591	Linoleic acid metabolism	Cyp2e1;Pla2g2a	2	139	34	7091	0.142795
4742	Taste transduction	Gnat3;Trpm5;Scn9a	3	139	67	7091	0.143597
4971	Gastric acid secretion	Adcy1;Atp1a2;Cftr	3	139	68	7091	0.148198
4976	Bile secretion	Cftr;Adcy1;Atp1a2	3	139	68	7091	0.148198
5133	Pertussis	Il6;C4bpa;C1s	3	139	69	7091	0.152847
5418	Fluid shear stress and atherosclerosis	Ccl2;Sele;Hmox1;Ccl12;Mmp2	5	139	145	7091	0.155203
4924	Renin secretion	Clca1;Nppa;Adrb3	3	139	70	7091	0.157542
4970	Salivary secretion	Adrb3;Adcy1;Atp1a2	3	139	71	7091	0.162281
72	Synthesis and degradation of ketone bodies	Hmgcs2	1	139	9	7091	0.163287
430	Taurine and hypotaurine metabolism	Cdo1	1	139	9	7091	0.163287
4973	Carbohydrate digestion and absorption	Gnat3;Atp1a2	2	139	37	7091	0.163392
5412	Arrhythmogenic right ventricular cardiomyopathy (ARVC)	Ryr2;Itgb8;Itga11	3	139	72	7091	0.167063
5219	Bladder cancer	Mmp2;Thbs1	2	139	38	7091	0.170372
4960	Aldosterone-regulated sodium reabsorption	Sfn;Atp1a2	2	139	38	7091	0.170372
4670	Leukocyte transendothelial migration	Cldn11;Mmp2;Cldn1;Myl7	4	139	111	7091	0.173006
750	Vitamin B6 metabolism	Aox3	1	139	10	7091	0.17971
4514	Cell adhesion molecules (CAMs)	Sele;Itgb8;Cldn11;Selp;Cldn1	5	139	154	7091	0.184362
4216	Ferroptosis	Slc7a11;Hmox1	2	139	40	7091	0.184476
4152	AMPK signaling pathway	Slc2a4;Pfkfb1;Ppargc1a;Cftr	4	139	121	7091	0.212942
4022	cGMP-PKG signaling pathway	Adcy1;Myh7;Atp1a2;Nppa;Adrb3	5	139	163	7091	0.215366
270	Cysteine and methionine metabolism	Bcat1;Cdo1	2	139	45	7091	0.220372
4911	Insulin secretion	Atp1a2;Ryr2;Adcy1	3	139	83	7091	0.222054
5323	Rheumatoid arthritis	Ccl12;Il6;Ccl2	3	139	83	7091	0.222054
4611	Platelet activation	Col1a1;Adcy1;NEWGENE_621351;Col3a1	4	139	124	7091	0.225403
380	Tryptophan metabolism	Inmt;Aox3	2	139	46	7091	0.227628
4145	Phagosome	Tubb6;Marco;Thbs2;Thbs1;Tuba8	5	139	168	7091	0.233269
4915	Estrogen signaling pathway	Mmp2;Krt15;Fkbp5;Adcy1	4	139	126	7091	0.233814
4012	ErbB signaling pathway	Areg;Ereg;Erbb4	3	139	86	7091	0.237654
4211	Longevity regulating pathway	Sod2;Adcy1;Ppargc1a	3	139	86	7091	0.237654
4540	Gap junction	Tuba8;Adcy1;Tubb6	3	139	86	7091	0.237654
5332	Graft-versus-host disease	Klrd1;Il6	2	139	51	7091	0.264096
4925	Aldosterone synthesis and secretion	Nppa;Atp1a2;Adcy1	3	139	94	7091	0.28006
980	Metabolism of xenobiotics by cytochrome P450	Aldh3a1;Cyp2e1	2	139	54	7091	0.286015
5134	Legionellosis	Tlr5;Il6	2	139	54	7091	0.286015
770	Pantothenate and CoA biosynthesis	Bcat1	1	139	17	7091	0.286043
4714	Thermogenesis	Adcy1;Bmp8b;Ppargc1a;Nppa;Adrb3;Cox8b	6	139	231	7091	0.299638
360	Phenylalanine metabolism	Aldh3a1	1	139	18	7091	0.300072
450	Selenocompound metabolism	Inmt	1	139	18	7091	0.300072
5150	Staphylococcus aureus infection	Selp;C1s	2	139	57	7091	0.307872
5200	Pathways in cancer	Heyl;Pgf;Zbtb16;Lamc3;Mmp2;Il6;Wnt5a;Hmox1;Gli1;Adcy1;Pax8;LOC102554659	12	139	515	7091	0.308901
220	Arginine biosynthesis	Arg1	1	139	19	7091	0.313827
5321	Inflammatory bowel disease (IBD)	Tlr5;Il6	2	139	59	7091	0.322375
830	Retinol metabolism	Aox3;LOC100365958	2	139	59	7091	0.322375
532	Glycosaminoglycan biosynthesis - chondroitin sulfate / dermatan sulfate	Chst13	1	139	20	7091	0.327314
4213	Longevity regulating pathway - multiple species	Adcy1;Sod2	2	139	61	7091	0.336804
4931	Insulin resistance	Ppargc1a;Il6;Slc2a4	3	139	105	7091	0.339306
4964	Proximal tubule bicarbonate reclamation	Atp1a2	1	139	21	7091	0.340537
4921	Oxytocin signaling pathway	Ryr2;Adcy1;Nppa;Kcnj4	4	139	151	7091	0.343545
4390	Hippo signaling pathway	Wnt5a;Bmp8b;Areg;Serpine1	4	139	152	7091	0.348027
5217	Basal cell carcinoma	Gli1;Wnt5a	2	139	63	7091	0.351142
4010	MAPK signaling pathway	Map3k6;Erbb4;Pgf;Angpt2;Ntrk2;Ereg;Areg	7	139	293	7091	0.351184
340	Histidine metabolism	Aldh3a1	1	139	22	7091	0.353503
514	Other types of O-glycan biosynthesis	Gxylt2	1	139	22	7091	0.353503
592	alpha-Linolenic acid metabolism	Pla2g2a	1	139	23	7091	0.366215
4080	Neuroactive ligand-receptor interaction	Sstr1;Adrb3;Gabrp;Gzma;LOC103694905;Tac4;Avpr1a	7	139	300	7091	0.373829
650	Butanoate metabolism	Hmgcs2	1	139	25	7091	0.3909
4530	Tight junction	Cftr;Tuba8;Cldn1;Cldn11	4	139	162	7091	0.39282
5204	Chemical carcinogenesis	Aldh3a1;Cyp2e1	2	139	69	7091	0.393473
590	Arachidonic acid metabolism	Cyp2e1;Pla2g2a	2	139	70	7091	0.400412
4920	Adipocytokine signaling pathway	Ppargc1a;Slc2a4	2	139	70	7091	0.400412
4966	Collecting duct acid secretion	Slc4a1	1	139	26	7091	0.402882
860	Porphyrin and chlorophyll metabolism	Hmox1	1	139	28	7091	0.426148
4068	FoxO signaling pathway	Sod2;Il6;Slc2a4	3	139	124	7091	0.440345
410	beta-Alanine metabolism	Aldh3a1	1	139	30	7091	0.448514
4014	Ras signaling pathway	LOC103694905;Pgf;Angpt2;Ntrk2;Pla2g2a	5	139	226	7091	0.456675
5202	Transcriptional misregulation in cancer	Etv4;Zbtb16;Pax8;Il6	4	139	177	7091	0.459044
5132	Salmonella infection	Tlr5;Il6	2	139	80	7091	0.467597
760	Nicotinate and nicotinamide metabolism	Aox3	1	139	32	7091	0.470015
4360	Axon guidance	Trpc4;Wnt5a;Ablim2;Rnd1	4	139	180	7091	0.472028
250	Alanine, aspartate and glutamate metabolism	Nat8l	1	139	33	7091	0.480451
51	Fructose and mannose metabolism	Pfkfb1	1	139	35	7091	0.500715
4550	Signaling pathways regulating pluripotency of stem cells	Wnt5a;Lif;Inhba	3	139	136	7091	0.501181
5033	Nicotine addiction	Gabrp	1	139	36	7091	0.51055
4727	GABAergic synapse	Adcy1;Gabrp	2	139	87	7091	0.51192
5210	Colorectal cancer	Ereg;Areg	2	139	87	7091	0.51192
4912	GnRH signaling pathway	Mmp2;Adcy1	2	139	88	7091	0.518054
5340	Primary immunodeficiency	Cd79a	1	139	37	7091	0.520194
5032	Morphine addiction	Adcy1;Gabrp	2	139	89	7091	0.524137
4922	Glucagon signaling pathway	Ppargc1a;Pfkfb1	2	139	89	7091	0.524137
4620	Toll-like receptor signaling pathway	Il6;Tlr5	2	139	89	7091	0.524137
5216	Thyroid cancer	Pax8	1	139	38	7091	0.529648
4975	Fat digestion and absorption	Pla2g2a	1	139	38	7091	0.529648
5222	Small cell lung cancer	Lamc3;LOC102554659	2	139	91	7091	0.53615
1522	Endocrine resistance	Mmp2;Adcy1	2	139	93	7091	0.547954
4916	Melanogenesis	Adcy1;Wnt5a	2	139	94	7091	0.553778
4713	Circadian entrainment	Adcy1;Ryr2	2	139	94	7091	0.553778
4072	Phospholipase D signaling pathway	Avpr1a;Cxcr1;Adcy1	3	139	147	7091	0.553909
4015	Rap1 signaling pathway	Angpt2;Adcy1;Thbs1;Pgf	4	139	201	7091	0.559233
5205	Proteoglycans in cancer	Erbb4;Mmp2;Thbs1;Wnt5a	4	139	201	7091	0.559233
4340	Hedgehog signaling pathway	Gli1	1	139	43	7091	0.574218
4672	Intestinal immune network for IgA production	Il6	1	139	43	7091	0.574218
4932	Non-alcoholic fatty liver disease (NAFLD)	Il6;Cox8b;Cyp2e1	3	139	152	7091	0.576772
4810	Regulation of actin cytoskeleton	Gsn;Itga11;Myl7;Itgb8	4	139	209	7091	0.5904
4961	Endocrine and other factor-regulated calcium reabsorption	Atp1a2	1	139	45	7091	0.590848
5164	Influenza A	Il6;Ccl2;Ccl12	3	139	157	7091	0.5989
565	Ether lipid metabolism	Pla2g2a	1	139	46	7091	0.598919
5030	Cocaine addiction	Ppp1r1b	1	139	46	7091	0.598919
5206	MicroRNAs in cancer	Hmox1;Serpinb5;Tnc;Thbs1	4	139	213	7091	0.605498
2010	ABC transporters	Cftr	1	139	47	7091	0.606833
520	Amino sugar and nucleotide sugar metabolism	Chia	1	139	47	7091	0.606833
4930	Type II diabetes mellitus	Slc2a4	1	139	47	7091	0.606833
4913	Ovarian steroidogenesis	Adcy1	1	139	47	7091	0.606833
4621	NOD-like receptor signaling pathway	Il6;Ccl12;Ccl2	3	139	159	7091	0.607539
5322	Systemic lupus erythematosus	C9;C1s	2	139	106	7091	0.619523
4625	C-type lectin receptor signaling pathway	Bcl3;Il6	2	139	107	7091	0.624655
4623	Cytosolic DNA-sensing pathway	Il6	1	139	50	7091	0.629655
330	Arginine and proline metabolism	Arg1	1	139	50	7091	0.629655
4725	Cholinergic synapse	Adcy1;Kcnj4	2	139	113	7091	0.654334
5145	Toxoplasmosis	LOC102554659;Lamc3	2	139	113	7091	0.654334
5163	Human cytomegalovirus infection	Ccl12;Ccl2;Adcy1;Il6	4	139	231	7091	0.66917
140	Steroid hormone biosynthesis	Cyp2e1	1	139	59	7091	0.690524
4940	Type I diabetes mellitus	Ptprn	1	139	59	7091	0.690524
10	Glycolysis / Gluconeogenesis	Aldh3a1	1	139	61	7091	0.702638
4720	Long-term potentiation	Adcy1	1	139	62	7091	0.708518
5031	Amphetamine addiction	Ppp1r1b	1	139	63	7091	0.714282
4910	Insulin signaling pathway	Slc2a4;Ppargc1a	2	139	127	7091	0.716339
4927	Cortisol synthesis and secretion	Adcy1	1	139	64	7091	0.719933
5016	Huntington disease	Ppargc1a;Cox8b;Sod2	3	139	189	7091	0.722098
5221	Acute myeloid leukemia	Zbtb16	1	139	67	7091	0.736228
4662	B cell receptor signaling pathway	Cd79a	1	139	70	7091	0.751582
983	Drug metabolism - other enzymes	Cyp2e1	1	139	73	7091	0.766049
5416	Viral myocarditis	Myh7	1	139	74	7091	0.770682
562	Inositol phosphate metabolism	Pik3c2g	1	139	74	7091	0.770682
4721	Synaptic vesicle cycle	Slc6a7	1	139	75	7091	0.775225
3320	PPAR signaling pathway	Hmgcs2	1	139	76	7091	0.779678
5224	Breast cancer	Heyl;Wnt5a	2	139	145	7091	0.782171
1524	Platinum drug resistance	Atp7b	1	139	78	7091	0.788323
1521	EGFR tyrosine kinase inhibitor resistance	Il6	1	139	79	7091	0.792519
5160	Hepatitis C	Cldn1;Cldn11	2	139	149	7091	0.794861
4612	Antigen processing and presentation	Klrd1	1	139	80	7091	0.796632
4723	Retrograde endocannabinoid signaling	Gabrp;Adcy1	2	139	150	7091	0.79793
4146	Peroxisome	Sod2	1	139	82	7091	0.804616
4934	Cushing syndrome	Adcy1;Wnt5a	2	139	154	7091	0.809808
4310	Wnt signaling pathway	Wnt5a;Ror2	2	139	156	7091	0.815513
4666	Fc gamma R-mediated phagocytosis	Gsn	1	139	86	7091	0.819664
5034	Alcoholism	Ppp1r1b;Ntrk2	2	139	158	7091	0.821065
4914	Progesterone-mediated oocyte maturation	Adcy1	1	139	88	7091	0.82675
4640	Hematopoietic cell lineage	Il6	1	139	89	7091	0.830189
4064	NF-kappa B signaling pathway	Card14	1	139	91	7091	0.836864
4070	Phosphatidylinositol signaling system	Pik3c2g	1	139	94	7091	0.846392
4218	Cellular senescence	Serpine1;Il6	2	139	171	7091	0.853659
564	Glycerophospholipid metabolism	Pla2g2a	1	139	97	7091	0.855367
5225	Hepatocellular carcinoma	Hmox1;Wnt5a	2	139	173	7091	0.858169
4659	Th17 cell differentiation	Il6	1	139	103	7091	0.871785
4928	Parathyroid hormone synthesis, secretion and action	Adcy1	1	139	104	7091	0.874335
4750	Inflammatory mediator regulation of TRP channels	Adcy1	1	139	106	7091	0.879286
4114	Oocyte meiosis	Adcy1	1	139	109	7091	0.886351
5167	Kaposi sarcoma-associated herpesvirus infection	Il6;Angpt2	2	139	189	7091	0.889935
4726	Serotonergic synapse	LOC103694905	1	139	112	7091	0.893005
4724	Glutamatergic synapse	Adcy1	1	139	113	7091	0.895136
4919	Thyroid hormone signaling pathway	Atp1a2	1	139	114	7091	0.897225
4142	Lysosome	Dnase2b	1	139	118	7091	0.905176
4650	Natural killer cell mediated cytotoxicity	Klrd1	1	139	118	7091	0.905176
4722	Neurotrophin signaling pathway	Ntrk2	1	139	119	7091	0.907066
4380	Osteoclast differentiation	Trem2	1	139	123	7091	0.91426
4110	Cell cycle	Sfn	1	139	124	7091	0.91597
4728	Dopaminergic synapse	Ppp1r1b	1	139	127	7091	0.920901
230	Purine metabolism	Adcy1	1	139	130	7091	0.925544
5162	Measles	Il6	1	139	133	7091	0.929916
4210	Apoptosis	Tuba8	1	139	134	7091	0.931316
190	Oxidative phosphorylation	Cox8b	1	139	134	7091	0.931316
5226	Gastric cancer	Wnt5a	1	139	144	7091	0.943876
5166	Human T-cell leukemia virus 1 infection	Adcy1;Il6	2	139	231	7091	0.944748
5012	Parkinson disease	Cox8b	1	139	146	7091	0.9461
5161	Hepatitis B	Il6	1	139	153	7091	0.953216
4150	mTOR signaling pathway	Wnt5a	1	139	154	7091	0.954153
5168	Herpes simplex virus 1 infection	Ccl12;Ccl2;Il6	3	139	321	7091	0.954902
3010	Ribosome	LOC100362027	1	139	161	7091	0.960212
5152	Tuberculosis	Il6	1	139	164	7091	0.962559
4144	Endocytosis	Cxcr1;Folr2	2	139	256	7091	0.963836
5010	Alzheimer disease	Cox8b	1	139	173	7091	0.968806
5203	Viral carcinogenesis	Gsn	1	139	207	7091	0.984382
5169	Epstein-Barr virus infection	Il6	1	139	212	7091	0.985896
4740	Olfactory transduction	Olr59	1	139	315	7091	0.998305
