# Supplementary material for: Analysis of the Potential Relationship between Aging and Pulmonary Fibrosis Based on Transcriptome
Source: Life (Basel). 2022 Nov 23;12(12):1961. doi: 10.3390/life12121961 (PMC9788318; doi:10.3390/life12121961)
Supplement: Supplementary file 1 [file life-12-01961-s001.zip › Table S10-o-Sham vs y-Sham GO enrichment Gene of Figure S1A.xlsx]

## Sheet: Sheet1
GO_ID	GO_Term	GO_function	GO_class	pvalue	Gene_ID	Gene_name	Description	FPKM.O_Sham1	FPKM.O_Sham2	FPKM.O_Sham3	FPKM.Y_Sham1	FPKM.Y_Sham2	FPKM.Y_Sham3	fc	log2(fc)	regulation
GO:0005201	extracellular matrix structural constituent	molecular_function	4	1.11545e-07	ENSRNOG00000001249	Col6a1	collagen type VI alpha 1 chain [Source:RGD Symbol;Acc:1565398]	46.125	44.8447	58.8249	100.324	89.8661	110.945	0.497433	-1.00743	down
GO:0005201	extracellular matrix structural constituent	molecular_function	4	1.11545e-07	ENSRNOG00000001469	Eln	elastin [Source:RGD Symbol;Acc:67394]	73.1078	65.5134	68.0227	159.291	311.13	177.739	0.318816	-1.6492	down
GO:0005201	extracellular matrix structural constituent	molecular_function	4	1.11545e-07	ENSRNOG00000003357	Col3a1	collagen type III alpha 1 chain [Source:RGD Symbol;Acc:71029]	156.474	148.568	159.465	332.712	580.742	362.723	0.363983	-1.45806	down
GO:0005201	extracellular matrix structural constituent	molecular_function	4	1.11545e-07	ENSRNOG00000003897	Col1a1	collagen type I alpha 1 chain [Source:RGD Symbol;Acc:61817]	21.9343	20.0594	21.0288	58.1167	63.4283	51.677	0.363825	-1.45869	down
GO:0005201	extracellular matrix structural constituent	molecular_function	4	1.11545e-07	ENSRNOG00000011292	NEWGENE_621351	collagen, type I, alpha 2 [Source:RGD Symbol;Acc:9452897]	39.3449	35.4719	44.7937	65.4149	127.389	75.4797	0.445837	-1.16541	down
GO:0005201	extracellular matrix structural constituent	molecular_function	4	1.11545e-07	ENSRNOG00000016177	Scara3	scavenger receptor class A, member 3 [Source:RGD Symbol;Acc:1309269]	5.49624	3.67234	4.02177	9.70825	9.66812	8.74041	0.469128	-1.09195	down
GO:0005201	extracellular matrix structural constituent	molecular_function	4	1.11545e-07	ENSRNOG00000052925	NEWGENE_621351	collagen, type I, alpha 2 [Source:RGD Symbol;Acc:9452897]	18.46	15.0008	14.0315	34.5066	31.6576	31.9137	0.48423	-1.04623	down
GO:0005201	extracellular matrix structural constituent	molecular_function	4	1.11545e-07	ENSRNOG00000060381	Col15a1	collagen type XV alpha 1 chain [Source:RGD Symbol;Acc:1310820]	2.72355	3.70059	6.38776	17.7121	9.88001	14.3242	0.305655	-1.71003	down
GO:0005615	extracellular space	cellular_component	4	7.55503e-07	ENSRNOG00000001249	Col6a1	collagen type VI alpha 1 chain [Source:RGD Symbol;Acc:1565398]	46.125	44.8447	58.8249	100.324	89.8661	110.945	0.497433	-1.00743	down
GO:0005615	extracellular space	cellular_component	4	7.55503e-07	ENSRNOG00000001821	Adipoq	adiponectin, C1Q and collagen domain containing [Source:RGD Symbol;Acc:628748]	0.269142	0.528074	0.422021	2.31808	1.93395	13.321	0.0693811	-3.84931	down
GO:0005615	extracellular space	cellular_component	4	7.55503e-07	ENSRNOG00000002792	Cxcl2	C-X-C motif chemokine ligand 2 [Source:RGD Symbol;Acc:70069]	2.49155	1.56141	2.22508	0.21844	0.639161	0.597588	4.31425	2.10911	up
GO:0005615	extracellular space	cellular_component	4	7.55503e-07	ENSRNOG00000003357	Col3a1	collagen type III alpha 1 chain [Source:RGD Symbol;Acc:71029]	156.474	148.568	159.465	332.712	580.742	362.723	0.363983	-1.45806	down
GO:0005615	extracellular space	cellular_component	4	7.55503e-07	ENSRNOG00000003732	Flrt2	fibronectin leucine rich transmembrane protein 2 [Source:RGD Symbol;Acc:1308574]	1.80281	2.04289	1.39731	3.1207	4.03324	3.75719	0.480519	-1.05733	down
GO:0005615	extracellular space	cellular_component	4	7.55503e-07	ENSRNOG00000003897	Col1a1	collagen type I alpha 1 chain [Source:RGD Symbol;Acc:61817]	21.9343	20.0594	21.0288	58.1167	63.4283	51.677	0.363825	-1.45869	down
GO:0005615	extracellular space	cellular_component	4	7.55503e-07	ENSRNOG00000004649	Il1b	interleukin 1 beta [Source:RGD Symbol;Acc:2891]	20.4545	17.8629	26.638	9.01274	9.02768	13.4852	2.0604	1.04293	up
GO:0005615	extracellular space	cellular_component	4	7.55503e-07	ENSRNOG00000005650	Pgf	placental growth factor [Source:RGD Symbol;Acc:619850]	1.81335	1.74628	1.74662	2.71735	7.21811	5.43133	0.345306	-1.53405	down
GO:0005615	extracellular space	cellular_component	4	7.55503e-07	ENSRNOG00000007765	Frzb	frizzled-related protein [Source:RGD Symbol;Acc:1311315]	0.835247	1.32762	1.13202	2.30154	1.72858	2.68979	0.490317	-1.02821	down
GO:0005615	extracellular space	cellular_component	4	7.55503e-07	ENSRNOG00000010617	Scube1	signal peptide, CUB domain and EGF like domain containing 1 [Source:RGD Symbol;Acc:1309015]	1.45564	1.53436	2.27365	3.64137	2.98263	4.25135	0.483999	-1.04692	down
GO:0005615	extracellular space	cellular_component	4	7.55503e-07	ENSRNOG00000010935	Cpb2	carboxypeptidase B2 [Source:RGD Symbol;Acc:71035]	0.244928	0.291876	0.095584	0	0	0	2107.96	11.0416	up
GO:0005615	extracellular space	cellular_component	4	7.55503e-07	ENSRNOG00000011631	Fst	follistatin [Source:RGD Symbol;Acc:2633]	3.03205	2.47665	3.75114	7.03347	7.00825	7.06256	0.438766	-1.18848	down
GO:0005615	extracellular space	cellular_component	4	7.55503e-07	ENSRNOG00000012324	Soga3	SOGA family member 3 [Source:RGD Symbol;Acc:11479453]	0.978627	0.601285	0.868766	0.30792	0.18986	0.320749	2.99156	1.5809	up
GO:0005615	extracellular space	cellular_component	4	7.55503e-07	ENSRNOG00000013304	Arg1	arginase 1 [Source:RGD Symbol;Acc:2150]	14.1945	11.7175	9.74681	5.09255	6.15658	5.0671	2.18549	1.12795	up
GO:0005615	extracellular space	cellular_component	4	7.55503e-07	ENSRNOG00000013736	C9	complement C9 [Source:RGD Symbol;Acc:620319]	0.095381	0.17503	0.090134	1.08752	0.317408	0.991207	0.150469	-2.73246	down
GO:0005615	extracellular space	cellular_component	4	7.55503e-07	ENSRNOG00000015618	Wnt5a	Wnt family member 5A [Source:RGD Symbol;Acc:69250]	3.0348	2.5955	2.2052	6.68335	4.54321	6.14645	0.451016	-1.14875	down
GO:0005615	extracellular space	cellular_component	4	7.55503e-07	ENSRNOG00000016177	Scara3	scavenger receptor class A, member 3 [Source:RGD Symbol;Acc:1309269]	5.49624	3.67234	4.02177	9.70825	9.66812	8.74041	0.469128	-1.09195	down
GO:0005615	extracellular space	cellular_component	4	7.55503e-07	ENSRNOG00000016695	Mmp2	matrix metallopeptidase 2 [Source:RGD Symbol;Acc:621316]	30.7938	26.2646	32.2348	67.5082	55.093	74.8328	0.452269	-1.14475	down
GO:0005615	extracellular space	cellular_component	4	7.55503e-07	ENSRNOG00000016696	Angpt2	angiopoietin 2 [Source:RGD Symbol;Acc:621861]	3.01199	2.77709	3.05503	7.45684	6.76239	7.96137	0.398732	-1.32651	down
GO:0005615	extracellular space	cellular_component	4	7.55503e-07	ENSRNOG00000018899	C5	complement C5 [Source:RGD Symbol;Acc:2237]	1.41673	11.2071	0.792005	0.351361	0.325713	0.313456	13.5441	3.7596	up
GO:0005615	extracellular space	cellular_component	4	7.55503e-07	ENSRNOG00000020579	Col7a1	collagen type VII alpha 1 chain [Source:RGD Symbol;Acc:1311417]	1.88501	2.20626	1.57632	5.02032	3.67603	4.38121	0.433383	-1.20629	down
GO:0005615	extracellular space	cellular_component	4	7.55503e-07	ENSRNOG00000022242	Cxcl9	C-X-C motif chemokine ligand 9 [Source:RGD Symbol;Acc:628798]	6.90616	5.99513	4.70513	2.639	3.00671	2.71353	2.10622	1.07466	up
GO:0005615	extracellular space	cellular_component	4	7.55503e-07	ENSRNOG00000024899	Cxcl13	C-X-C motif chemokine ligand 13 [Source:RGD Symbol;Acc:1564256]	0.505115	0.912997	2.0192	4.23093	3.68046	3.58254	0.299054	-1.74152	down
GO:0005615	extracellular space	cellular_component	4	7.55503e-07	ENSRNOG00000028548	Ccl9	chemokine (C-C motif) ligand 9 [Source:RGD Symbol;Acc:1310563]	37.5481	17.7937	27.4866	12.7972	13.0843	8.17364	2.43218	1.28225	up
GO:0005615	extracellular space	cellular_component	4	7.55503e-07	ENSRNOG00000033209	Bmp8b	bone morphogenetic protein 8b [Source:RGD Symbol;Acc:1591873]	1.03207	1.66145	1.31074	0.262554	0.64986	0.54328	2.75076	1.45983	up
GO:0005615	extracellular space	cellular_component	4	7.55503e-07	ENSRNOG00000043342	LOC290595	hypothetical gene supported by AF152002 [Source:RGD Symbol;Acc:1566160]	0.873931	12.6402	1.47192	0	0.505809	0.50069	14.8893	3.89621	up
GO:0005615	extracellular space	cellular_component	4	7.55503e-07	ENSRNOG00000045797	Lep	leptin [Source:RGD Symbol;Acc:3000]	0.038354	0.031345	0.037116	0.113483	0.270256	1.22499	0.0663972	-3.91273	down
GO:0005615	extracellular space	cellular_component	4	7.55503e-07	ENSRNOG00000046284	AABR07027451		26.299	19.8172	39.4233	14.0253	14.5267	12.5528	2.08101	1.05728	up
GO:0005615	extracellular space	cellular_component	4	7.55503e-07	ENSRNOG00000049590	RT1-M2	RT1 class Ib, locus M2 [Source:RGD Symbol;Acc:3493]	1.05738	0.72803	0.844597	0.257868	0	0.133657	6.71734	2.74789	up
GO:0005615	extracellular space	cellular_component	4	7.55503e-07	ENSRNOG00000050761	LOC100909524	serpin family A member 10 [Source:RGD Symbol;Acc:621220]	1.58588	1.13828	1.39171	0.39867	0.565611	0.809024	2.32102	1.21476	up
GO:0005615	extracellular space	cellular_component	4	7.55503e-07	ENSRNOG00000053527	AABR07034736		0.383625	8.49939	2.28705	0.376116	0.617458	0.239601	9.05798	3.17919	up
GO:0005615	extracellular space	cellular_component	4	7.55503e-07	ENSRNOG00000060381	Col15a1	collagen type XV alpha 1 chain [Source:RGD Symbol;Acc:1310820]	2.72355	3.70059	6.38776	17.7121	9.88001	14.3242	0.305655	-1.71003	down
GO:0005615	extracellular space	cellular_component	4	7.55503e-07	ENSRNOG00000060654	AABR07061068		1.08529	0.377827	8.27935	0	0	0	32474.9	14.987	up
GO:0005615	extracellular space	cellular_component	4	7.55503e-07	ENSRNOG00000061169	AABR07060952		2.81259	7.86063	2.48243	0.555443	0.274862	1.28312	6.22479	2.63802	up
GO:0031012	extracellular matrix	cellular_component	4	4.28054e-06	ENSRNOG00000000341	Nid2	nidogen 2 [Source:RGD Symbol;Acc:1311685]	2.31282	2.30347	2.63372	6.44043	3.59282	6.79857	0.430732	-1.21514	down
GO:0031012	extracellular matrix	cellular_component	4	4.28054e-06	ENSRNOG00000001249	Col6a1	collagen type VI alpha 1 chain [Source:RGD Symbol;Acc:1565398]	46.125	44.8447	58.8249	100.324	89.8661	110.945	0.497433	-1.00743	down
GO:0031012	extracellular matrix	cellular_component	4	4.28054e-06	ENSRNOG00000002461	Nid1	nidogen 1 [Source:RGD Symbol;Acc:3178]	7.0868	7.3753	8.23495	25.6053	16.1071	15.6315	0.395806	-1.33713	down
GO:0031012	extracellular matrix	cellular_component	4	4.28054e-06	ENSRNOG00000003018	Olfml2b	olfactomedin-like 2B [Source:RGD Symbol;Acc:1309257]	2.75388	1.92556	1.88733	5.19475	3.48674	5.50754	0.462806	-1.11152	down
GO:0031012	extracellular matrix	cellular_component	4	4.28054e-06	ENSRNOG00000003357	Col3a1	collagen type III alpha 1 chain [Source:RGD Symbol;Acc:71029]	156.474	148.568	159.465	332.712	580.742	362.723	0.363983	-1.45806	down
GO:0031012	extracellular matrix	cellular_component	4	4.28054e-06	ENSRNOG00000003897	Col1a1	collagen type I alpha 1 chain [Source:RGD Symbol;Acc:61817]	21.9343	20.0594	21.0288	58.1167	63.4283	51.677	0.363825	-1.45869	down
GO:0031012	extracellular matrix	cellular_component	4	4.28054e-06	ENSRNOG00000012058	Egflam	EGF-like, fibronectin type III and laminin G domains [Source:RGD Symbol;Acc:1306592]	2.05351	2.02171	3.25163	5.82235	4.33722	6.77696	0.432607	-1.20887	down
GO:0031012	extracellular matrix	cellular_component	4	4.28054e-06	ENSRNOG00000015618	Wnt5a	Wnt family member 5A [Source:RGD Symbol;Acc:69250]	3.0348	2.5955	2.2052	6.68335	4.54321	6.14645	0.451016	-1.14875	down
GO:0031012	extracellular matrix	cellular_component	4	4.28054e-06	ENSRNOG00000016177	Scara3	scavenger receptor class A, member 3 [Source:RGD Symbol;Acc:1309269]	5.49624	3.67234	4.02177	9.70825	9.66812	8.74041	0.469128	-1.09195	down
GO:0031012	extracellular matrix	cellular_component	4	4.28054e-06	ENSRNOG00000016695	Mmp2	matrix metallopeptidase 2 [Source:RGD Symbol;Acc:621316]	30.7938	26.2646	32.2348	67.5082	55.093	74.8328	0.452269	-1.14475	down
GO:0031012	extracellular matrix	cellular_component	4	4.28054e-06	ENSRNOG00000020579	Col7a1	collagen type VII alpha 1 chain [Source:RGD Symbol;Acc:1311417]	1.88501	2.20626	1.57632	5.02032	3.67603	4.38121	0.433383	-1.20629	down
GO:0031012	extracellular matrix	cellular_component	4	4.28054e-06	ENSRNOG00000060381	Col15a1	collagen type XV alpha 1 chain [Source:RGD Symbol;Acc:1310820]	2.72355	3.70059	6.38776	17.7121	9.88001	14.3242	0.305655	-1.71003	down
GO:0008009	chemokine activity	molecular_function	8	4.74413e-06	ENSRNOG00000002792	Cxcl2	C-X-C motif chemokine ligand 2 [Source:RGD Symbol;Acc:70069]	2.49155	1.56141	2.22508	0.21844	0.639161	0.597588	4.31425	2.10911	up
GO:0008009	chemokine activity	molecular_function	8	4.74413e-06	ENSRNOG00000011984	Cxcl14	C-X-C motif chemokine ligand 14 [Source:RGD Symbol;Acc:1307406]	17.269	9.0063	14.8414	32.6124	37.6915	54.0632	0.330608	-1.59681	down
GO:0008009	chemokine activity	molecular_function	8	4.74413e-06	ENSRNOG00000022242	Cxcl9	C-X-C motif chemokine ligand 9 [Source:RGD Symbol;Acc:628798]	6.90616	5.99513	4.70513	2.639	3.00671	2.71353	2.10622	1.07466	up
GO:0008009	chemokine activity	molecular_function	8	4.74413e-06	ENSRNOG00000024899	Cxcl13	C-X-C motif chemokine ligand 13 [Source:RGD Symbol;Acc:1564256]	0.505115	0.912997	2.0192	4.23093	3.68046	3.58254	0.299054	-1.74152	down
GO:0008009	chemokine activity	molecular_function	8	4.74413e-06	ENSRNOG00000028548	Ccl9	chemokine (C-C motif) ligand 9 [Source:RGD Symbol;Acc:1310563]	37.5481	17.7937	27.4866	12.7972	13.0843	8.17364	2.43218	1.28225	up
GO:0008009	chemokine activity	molecular_function	8	4.74413e-06	ENSRNOG00000043342	LOC290595	hypothetical gene supported by AF152002 [Source:RGD Symbol;Acc:1566160]	0.873931	12.6402	1.47192	0	0.505809	0.50069	14.8893	3.89621	up
GO:0030198	extracellular matrix organization	biological_process	6	6.10998e-06	ENSRNOG00000001249	Col6a1	collagen type VI alpha 1 chain [Source:RGD Symbol;Acc:1565398]	46.125	44.8447	58.8249	100.324	89.8661	110.945	0.497433	-1.00743	down
GO:0030198	extracellular matrix organization	biological_process	6	6.10998e-06	ENSRNOG00000001469	Eln	elastin [Source:RGD Symbol;Acc:67394]	73.1078	65.5134	68.0227	159.291	311.13	177.739	0.318816	-1.6492	down
GO:0030198	extracellular matrix organization	biological_process	6	6.10998e-06	ENSRNOG00000002461	Nid1	nidogen 1 [Source:RGD Symbol;Acc:3178]	7.0868	7.3753	8.23495	25.6053	16.1071	15.6315	0.395806	-1.33713	down
GO:0030198	extracellular matrix organization	biological_process	6	6.10998e-06	ENSRNOG00000003018	Olfml2b	olfactomedin-like 2B [Source:RGD Symbol;Acc:1309257]	2.75388	1.92556	1.88733	5.19475	3.48674	5.50754	0.462806	-1.11152	down
GO:0030198	extracellular matrix organization	biological_process	6	6.10998e-06	ENSRNOG00000003357	Col3a1	collagen type III alpha 1 chain [Source:RGD Symbol;Acc:71029]	156.474	148.568	159.465	332.712	580.742	362.723	0.363983	-1.45806	down
GO:0030198	extracellular matrix organization	biological_process	6	6.10998e-06	ENSRNOG00000003897	Col1a1	collagen type I alpha 1 chain [Source:RGD Symbol;Acc:61817]	21.9343	20.0594	21.0288	58.1167	63.4283	51.677	0.363825	-1.45869	down
GO:0030198	extracellular matrix organization	biological_process	6	6.10998e-06	ENSRNOG00000012058	Egflam	EGF-like, fibronectin type III and laminin G domains [Source:RGD Symbol;Acc:1306592]	2.05351	2.02171	3.25163	5.82235	4.33722	6.77696	0.432607	-1.20887	down
GO:0030198	extracellular matrix organization	biological_process	6	6.10998e-06	ENSRNOG00000016177	Scara3	scavenger receptor class A, member 3 [Source:RGD Symbol;Acc:1309269]	5.49624	3.67234	4.02177	9.70825	9.66812	8.74041	0.469128	-1.09195	down
GO:0030198	extracellular matrix organization	biological_process	6	6.10998e-06	ENSRNOG00000060381	Col15a1	collagen type XV alpha 1 chain [Source:RGD Symbol;Acc:1310820]	2.72355	3.70059	6.38776	17.7121	9.88001	14.3242	0.305655	-1.71003	down
GO:0009617	response to bacterium	biological_process	7	2.72627e-05	ENSRNOG00000001821	Adipoq	adiponectin, C1Q and collagen domain containing [Source:RGD Symbol;Acc:628748]	0.269142	0.528074	0.422021	2.31808	1.93395	13.321	0.0693811	-3.84931	down
GO:0009617	response to bacterium	biological_process	7	2.72627e-05	ENSRNOG00000008943	Penk	proenkephalin [Source:RGD Symbol;Acc:68946]	1.132	1.55783	3.43566	0.621514	0.959967	0.863637	2.50519	1.32492	up
GO:0009617	response to bacterium	biological_process	7	2.72627e-05	ENSRNOG00000010079	Ca3	carbonic anhydrase 3 [Source:RGD Symbol;Acc:2241]	2.52678	4.82757	3.94699	10.1675	12.1564	43.507	0.171672	-2.54227	down
GO:0009617	response to bacterium	biological_process	7	2.72627e-05	ENSRNOG00000012404	Thrsp	thyroid hormone responsive [Source:RGD Symbol;Acc:3859]	0.577546	0.320142	0.530996	1.2563	0.946753	66.5639	0.0207757	-5.58896	down
GO:0009617	response to bacterium	biological_process	7	2.72627e-05	ENSRNOG00000022242	Cxcl9	C-X-C motif chemokine ligand 9 [Source:RGD Symbol;Acc:628798]	6.90616	5.99513	4.70513	2.639	3.00671	2.71353	2.10622	1.07466	up
GO:0009617	response to bacterium	biological_process	7	2.72627e-05	ENSRNOG00000025300	Fer1l6	fer-1-like family member 6 [Source:RGD Symbol;Acc:1564703]	0.0119834	0.0256819	0.0413083	0.345032	0.0490612	0.308355	0.112426	-3.15295	down
GO:0009617	response to bacterium	biological_process	7	2.72627e-05	ENSRNOG00000028616	Pck1	phosphoenolpyruvate carboxykinase 1 [Source:RGD Symbol;Acc:3267]	0.294123	0.258891	0.731558	1.09133	1.59168	18.8392	0.0596858	-4.06647	down
GO:0009617	response to bacterium	biological_process	7	2.72627e-05	ENSRNOG00000029342	Scn7a	sodium voltage-gated channel alpha subunit 7 [Source:RGD Symbol;Acc:61922]	11.5574	9.24312	13.5523	34.1139	29.6192	24.4067	0.389754	-1.35936	down
GO:0006955	immune response	biological_process	4	2.92863e-05	ENSRNOG00000002792	Cxcl2	C-X-C motif chemokine ligand 2 [Source:RGD Symbol;Acc:70069]	2.49155	1.56141	2.22508	0.21844	0.639161	0.597588	4.31425	2.10911	up
GO:0006955	immune response	biological_process	4	2.92863e-05	ENSRNOG00000004649	Il1b	interleukin 1 beta [Source:RGD Symbol;Acc:2891]	20.4545	17.8629	26.638	9.01274	9.02768	13.4852	2.0604	1.04293	up
GO:0006955	immune response	biological_process	4	2.92863e-05	ENSRNOG00000011984	Cxcl14	C-X-C motif chemokine ligand 14 [Source:RGD Symbol;Acc:1307406]	17.269	9.0063	14.8414	32.6124	37.6915	54.0632	0.330608	-1.59681	down
GO:0006955	immune response	biological_process	4	2.92863e-05	ENSRNOG00000013736	C9	complement C9 [Source:RGD Symbol;Acc:620319]	0.095381	0.17503	0.090134	1.08752	0.317408	0.991207	0.150469	-2.73246	down
GO:0006955	immune response	biological_process	4	2.92863e-05	ENSRNOG00000022242	Cxcl9	C-X-C motif chemokine ligand 9 [Source:RGD Symbol;Acc:628798]	6.90616	5.99513	4.70513	2.639	3.00671	2.71353	2.10622	1.07466	up
GO:0006955	immune response	biological_process	4	2.92863e-05	ENSRNOG00000024899	Cxcl13	C-X-C motif chemokine ligand 13 [Source:RGD Symbol;Acc:1564256]	0.505115	0.912997	2.0192	4.23093	3.68046	3.58254	0.299054	-1.74152	down
GO:0006955	immune response	biological_process	4	2.92863e-05	ENSRNOG00000028548	Ccl9	chemokine (C-C motif) ligand 9 [Source:RGD Symbol;Acc:1310563]	37.5481	17.7937	27.4866	12.7972	13.0843	8.17364	2.43218	1.28225	up
GO:0006955	immune response	biological_process	4	2.92863e-05	ENSRNOG00000030431	RT1-Db2	RT1 class II, locus Db2 [Source:RGD Symbol;Acc:1595922]	3.57562	1.76437	1.09238	0.503178	0.344361	1.19923	3.14269	1.652	up
GO:0006955	immune response	biological_process	4	2.92863e-05	ENSRNOG00000031726	Oas1e	2'-5' oligoadenylate synthetase 1E [Source:RGD Symbol;Acc:1359611]	0.646396	0.861948	0.878264	0.344998	0.307314	0.376117	2.32063	1.21452	up
GO:0006955	immune response	biological_process	4	2.92863e-05	ENSRNOG00000046284	AABR07027451		26.299	19.8172	39.4233	14.0253	14.5267	12.5528	2.08101	1.05728	up
GO:0006955	immune response	biological_process	4	2.92863e-05	ENSRNOG00000048239	Cxcr1	C-X-C motif chemokine receptor 1 [Source:RGD Symbol;Acc:2905]	16.0266	13.947	11.851	5.02716	3.39089	4.10572	3.33962	1.73968	up
GO:0006955	immune response	biological_process	4	2.92863e-05	ENSRNOG00000049590	RT1-M2	RT1 class Ib, locus M2 [Source:RGD Symbol;Acc:3493]	1.05738	0.72803	0.844597	0.257868	0	0.133657	6.71734	2.74789	up
GO:0006955	immune response	biological_process	4	2.92863e-05	ENSRNOG00000053527	AABR07034736		0.383625	8.49939	2.28705	0.376116	0.617458	0.239601	9.05798	3.17919	up
GO:0006955	immune response	biological_process	4	2.92863e-05	ENSRNOG00000060654	AABR07061068		1.08529	0.377827	8.27935	0	0	0	32474.9	14.987	up
GO:0006955	immune response	biological_process	4	2.92863e-05	ENSRNOG00000061169	AABR07060952		2.81259	7.86063	2.48243	0.555443	0.274862	1.28312	6.22479	2.63802	up
GO:0030593	neutrophil chemotaxis	biological_process	7	4.94265e-05	ENSRNOG00000002792	Cxcl2	C-X-C motif chemokine ligand 2 [Source:RGD Symbol;Acc:70069]	2.49155	1.56141	2.22508	0.21844	0.639161	0.597588	4.31425	2.10911	up
GO:0030593	neutrophil chemotaxis	biological_process	7	4.94265e-05	ENSRNOG00000004649	Il1b	interleukin 1 beta [Source:RGD Symbol;Acc:2891]	20.4545	17.8629	26.638	9.01274	9.02768	13.4852	2.0604	1.04293	up
GO:0030593	neutrophil chemotaxis	biological_process	7	4.94265e-05	ENSRNOG00000022242	Cxcl9	C-X-C motif chemokine ligand 9 [Source:RGD Symbol;Acc:628798]	6.90616	5.99513	4.70513	2.639	3.00671	2.71353	2.10622	1.07466	up
GO:0030593	neutrophil chemotaxis	biological_process	7	4.94265e-05	ENSRNOG00000024899	Cxcl13	C-X-C motif chemokine ligand 13 [Source:RGD Symbol;Acc:1564256]	0.505115	0.912997	2.0192	4.23093	3.68046	3.58254	0.299054	-1.74152	down
GO:0030593	neutrophil chemotaxis	biological_process	7	4.94265e-05	ENSRNOG00000028548	Ccl9	chemokine (C-C motif) ligand 9 [Source:RGD Symbol;Acc:1310563]	37.5481	17.7937	27.4866	12.7972	13.0843	8.17364	2.43218	1.28225	up
GO:0030593	neutrophil chemotaxis	biological_process	7	4.94265e-05	ENSRNOG00000048239	Cxcr1	C-X-C motif chemokine receptor 1 [Source:RGD Symbol;Acc:2905]	16.0266	13.947	11.851	5.02716	3.39089	4.10572	3.33962	1.73968	up
GO:0005576	extracellular region	cellular_component	3	7.71591e-05	ENSRNOG00000001249	Col6a1	collagen type VI alpha 1 chain [Source:RGD Symbol;Acc:1565398]	46.125	44.8447	58.8249	100.324	89.8661	110.945	0.497433	-1.00743	down
GO:0005576	extracellular region	cellular_component	3	7.71591e-05	ENSRNOG00000001821	Adipoq	adiponectin, C1Q and collagen domain containing [Source:RGD Symbol;Acc:628748]	0.269142	0.528074	0.422021	2.31808	1.93395	13.321	0.0693811	-3.84931	down
GO:0005576	extracellular region	cellular_component	3	7.71591e-05	ENSRNOG00000002792	Cxcl2	C-X-C motif chemokine ligand 2 [Source:RGD Symbol;Acc:70069]	2.49155	1.56141	2.22508	0.21844	0.639161	0.597588	4.31425	2.10911	up
GO:0005576	extracellular region	cellular_component	3	7.71591e-05	ENSRNOG00000003357	Col3a1	collagen type III alpha 1 chain [Source:RGD Symbol;Acc:71029]	156.474	148.568	159.465	332.712	580.742	362.723	0.363983	-1.45806	down
GO:0005576	extracellular region	cellular_component	3	7.71591e-05	ENSRNOG00000003732	Flrt2	fibronectin leucine rich transmembrane protein 2 [Source:RGD Symbol;Acc:1308574]	1.80281	2.04289	1.39731	3.1207	4.03324	3.75719	0.480519	-1.05733	down
GO:0005576	extracellular region	cellular_component	3	7.71591e-05	ENSRNOG00000003897	Col1a1	collagen type I alpha 1 chain [Source:RGD Symbol;Acc:61817]	21.9343	20.0594	21.0288	58.1167	63.4283	51.677	0.363825	-1.45869	down
GO:0005576	extracellular region	cellular_component	3	7.71591e-05	ENSRNOG00000004649	Il1b	interleukin 1 beta [Source:RGD Symbol;Acc:2891]	20.4545	17.8629	26.638	9.01274	9.02768	13.4852	2.0604	1.04293	up
GO:0005576	extracellular region	cellular_component	3	7.71591e-05	ENSRNOG00000005650	Pgf	placental growth factor [Source:RGD Symbol;Acc:619850]	1.81335	1.74628	1.74662	2.71735	7.21811	5.43133	0.345306	-1.53405	down
GO:0005576	extracellular region	cellular_component	3	7.71591e-05	ENSRNOG00000007765	Frzb	frizzled-related protein [Source:RGD Symbol;Acc:1311315]	0.835247	1.32762	1.13202	2.30154	1.72858	2.68979	0.490317	-1.02821	down
GO:0005576	extracellular region	cellular_component	3	7.71591e-05	ENSRNOG00000008943	Penk	proenkephalin [Source:RGD Symbol;Acc:68946]	1.132	1.55783	3.43566	0.621514	0.959967	0.863637	2.50519	1.32492	up
GO:0005576	extracellular region	cellular_component	3	7.71591e-05	ENSRNOG00000010714	Fgl1	fibrinogen-like 1 [Source:RGD Symbol;Acc:620169]	0.921761	1.10377	0.860493	0.23436	0.488145	0.319112	2.77071	1.47026	up
GO:0005576	extracellular region	cellular_component	3	7.71591e-05	ENSRNOG00000010832	Pdgfrl	platelet-derived growth factor receptor-like [Source:RGD Symbol;Acc:1308028]	0.90916	1.0329	1.22418	2.22021	2.05811	3.50269	0.406919	-1.29719	down
GO:0005576	extracellular region	cellular_component	3	7.71591e-05	ENSRNOG00000010935	Cpb2	carboxypeptidase B2 [Source:RGD Symbol;Acc:71035]	0.244928	0.291876	0.095584	0	0	0	2107.96	11.0416	up
GO:0005576	extracellular region	cellular_component	3	7.71591e-05	ENSRNOG00000011631	Fst	follistatin [Source:RGD Symbol;Acc:2633]	3.03205	2.47665	3.75114	7.03347	7.00825	7.06256	0.438766	-1.18848	down
GO:0005576	extracellular region	cellular_component	3	7.71591e-05	ENSRNOG00000011984	Cxcl14	C-X-C motif chemokine ligand 14 [Source:RGD Symbol;Acc:1307406]	17.269	9.0063	14.8414	32.6124	37.6915	54.0632	0.330608	-1.59681	down
GO:0005576	extracellular region	cellular_component	3	7.71591e-05	ENSRNOG00000015618	Wnt5a	Wnt family member 5A [Source:RGD Symbol;Acc:69250]	3.0348	2.5955	2.2052	6.68335	4.54321	6.14645	0.451016	-1.14875	down
GO:0005576	extracellular region	cellular_component	3	7.71591e-05	ENSRNOG00000016696	Angpt2	angiopoietin 2 [Source:RGD Symbol;Acc:621861]	3.01199	2.77709	3.05503	7.45684	6.76239	7.96137	0.398732	-1.32651	down
GO:0005576	extracellular region	cellular_component	3	7.71591e-05	ENSRNOG00000018899	C5	complement C5 [Source:RGD Symbol;Acc:2237]	1.41673	11.2071	0.792005	0.351361	0.325713	0.313456	13.5441	3.7596	up
GO:0005576	extracellular region	cellular_component	3	7.71591e-05	ENSRNOG00000022242	Cxcl9	C-X-C motif chemokine ligand 9 [Source:RGD Symbol;Acc:628798]	6.90616	5.99513	4.70513	2.639	3.00671	2.71353	2.10622	1.07466	up
GO:0005576	extracellular region	cellular_component	3	7.71591e-05	ENSRNOG00000024899	Cxcl13	C-X-C motif chemokine ligand 13 [Source:RGD Symbol;Acc:1564256]	0.505115	0.912997	2.0192	4.23093	3.68046	3.58254	0.299054	-1.74152	down
GO:0005576	extracellular region	cellular_component	3	7.71591e-05	ENSRNOG00000028548	Ccl9	chemokine (C-C motif) ligand 9 [Source:RGD Symbol;Acc:1310563]	37.5481	17.7937	27.4866	12.7972	13.0843	8.17364	2.43218	1.28225	up
GO:0005576	extracellular region	cellular_component	3	7.71591e-05	ENSRNOG00000033209	Bmp8b	bone morphogenetic protein 8b [Source:RGD Symbol;Acc:1591873]	1.03207	1.66145	1.31074	0.262554	0.64986	0.54328	2.75076	1.45983	up
GO:0005576	extracellular region	cellular_component	3	7.71591e-05	ENSRNOG00000043342	LOC290595	hypothetical gene supported by AF152002 [Source:RGD Symbol;Acc:1566160]	0.873931	12.6402	1.47192	0	0.505809	0.50069	14.8893	3.89621	up
GO:0005576	extracellular region	cellular_component	3	7.71591e-05	ENSRNOG00000045797	Lep	leptin [Source:RGD Symbol;Acc:3000]	0.038354	0.031345	0.037116	0.113483	0.270256	1.22499	0.0663972	-3.91273	down
GO:0005576	extracellular region	cellular_component	3	7.71591e-05	ENSRNOG00000050761	LOC100909524	serpin family A member 10 [Source:RGD Symbol;Acc:621220]	1.58588	1.13828	1.39171	0.39867	0.565611	0.809024	2.32102	1.21476	up
GO:0033162	melanosome membrane	cellular_component	7	9.12529e-05	ENSRNOG00000008816	Gpnmb	glycoprotein nmb [Source:RGD Symbol;Acc:71008]	194.008	146.217	143.748	84.0387	88.9556	65.1415	2.03234	1.02314	up
GO:0033162	melanosome membrane	cellular_component	7	9.12529e-05	ENSRNOG00000014465	Oca2	OCA2 melanosomal transmembrane protein [Source:RGD Symbol;Acc:2318412]	0	0	0	0.101048	0.120925	0.079096	0.000996449	-9.97092	down
GO:0033162	melanosome membrane	cellular_component	7	9.12529e-05	ENSRNOG00000015774	Mreg	melanoregulin [Source:RGD Symbol;Acc:1562333]	0.826137	1.91827	1.79114	0.453484	0.431069	0.6671	2.92304	1.54747	up
GO:0071639	positive regulation of monocyte chemotactic protein-1 production	biological_process	9	0.000135668	ENSRNOG00000001821	Adipoq	adiponectin, C1Q and collagen domain containing [Source:RGD Symbol;Acc:628748]	0.269142	0.528074	0.422021	2.31808	1.93395	13.321	0.0693811	-3.84931	down
GO:0071639	positive regulation of monocyte chemotactic protein-1 production	biological_process	9	0.000135668	ENSRNOG00000004649	Il1b	interleukin 1 beta [Source:RGD Symbol;Acc:2891]	20.4545	17.8629	26.638	9.01274	9.02768	13.4852	2.0604	1.04293	up
GO:0071639	positive regulation of monocyte chemotactic protein-1 production	biological_process	9	0.000135668	ENSRNOG00000015089	Mcoln2	mucolipin 2 [Source:RGD Symbol;Acc:1308884]	7.1303	6.82353	5.88089	3.61028	2.8491	3.26985	2.03867	1.02763	up
GO:0044381	glucose import in response to insulin stimulus	biological_process	13	0.000143302	ENSRNOG00000017226	Slc2a4	solute carrier family 2 member 4 [Source:RGD Symbol;Acc:2711]	0.725115	0.747971	0.866538	1.38289	1.35574	3.8632	0.35439	-1.49659	down
GO:0044381	glucose import in response to insulin stimulus	biological_process	13	0.000143302	ENSRNOG00000022239	Trarg1	trafficking regulator of GLUT4 (SLC2A4) 1 [Source:RGD Symbol;Acc:1307639]	2.12065	2.24179	2.81453	5.40766	4.54121	9.15362	0.375708	-1.41232	down
GO:1905517	macrophage migration	biological_process	6	0.000143302	ENSRNOG00000015089	Mcoln2	mucolipin 2 [Source:RGD Symbol;Acc:1308884]	7.1303	6.82353	5.88089	3.61028	2.8491	3.26985	2.03867	1.02763	up
GO:1905517	macrophage migration	biological_process	6	0.000143302	ENSRNOG00000053232	Ror2	receptor tyrosine kinase-like orphan receptor 2 [Source:RGD Symbol;Acc:1305275]	0.93753	0.843785	1.20048	2.20838	2.23265	2.21271	0.448138	-1.15799	down
GO:0005887	integral component of plasma membrane	cellular_component	6	0.000175791	ENSRNOG00000003732	Flrt2	fibronectin leucine rich transmembrane protein 2 [Source:RGD Symbol;Acc:1308574]	1.80281	2.04289	1.39731	3.1207	4.03324	3.75719	0.480519	-1.05733	down
GO:0005887	integral component of plasma membrane	cellular_component	6	0.000175791	ENSRNOG00000007865	Ephb1	Eph receptor B1 [Source:RGD Symbol;Acc:2556]	0.836464	0.793073	1.14742	0.471882	0.398737	0.218471	2.5498	1.35038	up
GO:0005887	integral component of plasma membrane	cellular_component	6	0.000175791	ENSRNOG00000008816	Gpnmb	glycoprotein nmb [Source:RGD Symbol;Acc:71008]	194.008	146.217	143.748	84.0387	88.9556	65.1415	2.03234	1.02314	up
GO:0005887	integral component of plasma membrane	cellular_component	6	0.000175791	ENSRNOG00000009686	Aqp7	aquaporin 7 [Source:RGD Symbol;Acc:2145]	0.04156	0.071983	0.079689	0.169014	0.259968	3.27253	0.0522035	-4.25971	down
GO:0005887	integral component of plasma membrane	cellular_component	6	0.000175791	ENSRNOG00000012367	Pcdh7	protocadherin 7 [Source:RGD Symbol;Acc:1303209]	0.812085	0.617343	0.767092	1.37347	2.74181	1.534	0.388814	-1.36285	down
GO:0005887	integral component of plasma membrane	cellular_component	6	0.000175791	ENSRNOG00000012674	Adrb3	adrenoceptor beta 3 [Source:RGD Symbol;Acc:2061]	0	0	0	0.089852	0.041841	1.01731	0.000261096	-11.9031	down
GO:0005887	integral component of plasma membrane	cellular_component	6	0.000175791	ENSRNOG00000013306	Pcdh20	protocadherin 20 [Source:RGD Symbol;Acc:1306297]	0.199983	0.074123	0.181417	0.636184	0.284763	0.574304	0.304647	-1.71479	down
GO:0005887	integral component of plasma membrane	cellular_component	6	0.000175791	ENSRNOG00000013887	Adra2b	adrenoceptor alpha 2B [Source:RGD Symbol;Acc:2057]	0.311704	0.246273	0.182689	0.886988	0.676955	1.17461	0.270458	-1.88652	down
GO:0005887	integral component of plasma membrane	cellular_component	6	0.000175791	ENSRNOG00000014398	Scara5	scavenger receptor class A, member 5 [Source:RGD Symbol;Acc:1306539]	2.21572	1.73413	2.82895	4.67709	3.10302	6.24355	0.483384	-1.04876	down
GO:0005887	integral component of plasma membrane	cellular_component	6	0.000175791	ENSRNOG00000016070	Trpc3	transient receptor potential cation channel, subfamily C, member 3 [Source:RGD Symbol;Acc:61973]	0.998502	0.698946	0.823061	2.01864	2.08611	2.63759	0.373833	-1.41954	down
GO:0005887	integral component of plasma membrane	cellular_component	6	0.000175791	ENSRNOG00000017226	Slc2a4	solute carrier family 2 member 4 [Source:RGD Symbol;Acc:2711]	0.725115	0.747971	0.866538	1.38289	1.35574	3.8632	0.35439	-1.49659	down
GO:0005887	integral component of plasma membrane	cellular_component	6	0.000175791	ENSRNOG00000018853	Slc28a3	solute carrier family 28 member 3 [Source:RGD Symbol;Acc:621224]	3.05653	3.81928	7.36752	12.4951	9.4451	10.0783	0.444846	-1.16862	down
GO:0005887	integral component of plasma membrane	cellular_component	6	0.000175791	ENSRNOG00000020054	LOC108348201	protocadherin beta-7-like [Source:RGD Symbol;Acc:11368541]	0.582061	0.474989	0.669141	1.45791	0.928726	1.18222	0.483683	-1.04787	down
GO:0005887	integral component of plasma membrane	cellular_component	6	0.000175791	ENSRNOG00000027767	Slc38a5	solute carrier family 38, member 5 [Source:RGD Symbol;Acc:620702]	3.29864	4.26098	4.74245	7.87061	7.30095	9.9667	0.489376	-1.03098	down
GO:0005887	integral component of plasma membrane	cellular_component	6	0.000175791	ENSRNOG00000036984	Slco1a1	solute carrier organic anion transporter family, member 1a1 [Source:RGD Symbol;Acc:3700]	0.270199	0.433603	0.341127	0.058162	0.110115	0.019966	5.55096	2.47274	up
GO:0005887	integral component of plasma membrane	cellular_component	6	0.000175791	ENSRNOG00000048145	Sstr1	somatostatin receptor 1 [Source:RGD Symbol;Acc:3762]	1.29021	1.61171	1.86831	0.504885	0.640927	0.601976	2.72929	1.44853	up
GO:0005887	integral component of plasma membrane	cellular_component	6	0.000175791	ENSRNOG00000052486	Kcna6	potassium voltage-gated channel subfamily A member 6 [Source:RGD Symbol;Acc:62083]	0.206521	0.495587	0.476457	0.150545	0.128976	0.104822	3.06644	1.61657	up
GO:0005887	integral component of plasma membrane	cellular_component	6	0.000175791	ENSRNOG00000053232	Ror2	receptor tyrosine kinase-like orphan receptor 2 [Source:RGD Symbol;Acc:1305275]	0.93753	0.843785	1.20048	2.20838	2.23265	2.21271	0.448138	-1.15799	down
GO:0005887	integral component of plasma membrane	cellular_component	6	0.000175791	ENSRNOG00000055103	Cftr	cystic fibrosis transmembrane conductance regulator [Source:RGD Symbol;Acc:2332]	1.14851	0.941143	0.718715	2.41175	2.46834	1.29678	0.454659	-1.13714	down
GO:0005887	integral component of plasma membrane	cellular_component	6	0.000175791	ENSRNOG00000057643	Klri2	killer cell lectin-like receptor family I member 2 [Source:RGD Symbol;Acc:1359205]	4.15407	4.85632	2.9182	1.3324	0.727116	2.385	2.68389	1.42433	up
GO:0005887	integral component of plasma membrane	cellular_component	6	0.000175791	ENSRNOG00000058692	Slc26a4	solute carrier family 26 member 4 [Source:RGD Symbol;Acc:3293]	2.67212	1.9953	1.15691	1.03707	0.715431	0.934049	2.16796	1.11634	up
GO:0005887	integral component of plasma membrane	cellular_component	6	0.000175791	ENSRNOG00000060831	Clca1	chloride channel accessory 1 [Source:RGD Symbol;Acc:1306258]	0.066168	0.138958	0.180644	1.43964	0.094998	1.08019	0.147532	-2.7609	down
GO:0048407	platelet-derived growth factor binding	molecular_function	6	0.000192097	ENSRNOG00000001249	Col6a1	collagen type VI alpha 1 chain [Source:RGD Symbol;Acc:1565398]	46.125	44.8447	58.8249	100.324	89.8661	110.945	0.497433	-1.00743	down
GO:0048407	platelet-derived growth factor binding	molecular_function	6	0.000192097	ENSRNOG00000003357	Col3a1	collagen type III alpha 1 chain [Source:RGD Symbol;Acc:71029]	156.474	148.568	159.465	332.712	580.742	362.723	0.363983	-1.45806	down
GO:0048407	platelet-derived growth factor binding	molecular_function	6	0.000192097	ENSRNOG00000003897	Col1a1	collagen type I alpha 1 chain [Source:RGD Symbol;Acc:61817]	21.9343	20.0594	21.0288	58.1167	63.4283	51.677	0.363825	-1.45869	down
GO:0016021	integral component of membrane	cellular_component	5	0.000278486	ENSRNOG00000000572	Chst3	carbohydrate sulfotransferase 3 [Source:RGD Symbol;Acc:620355]	1.16179	1.79049	1.49114	6.49275	3.57535	2.86355	0.343608	-1.54116	down
GO:0016021	integral component of membrane	cellular_component	5	0.000278486	ENSRNOG00000000700	Tmem119	transmembrane protein 119 [Source:RGD Symbol;Acc:1307573]	6.59079	6.90106	6.28528	11.3215	14.3882	15.1594	0.483913	-1.04718	down
GO:0016021	integral component of membrane	cellular_component	5	0.000278486	ENSRNOG00000001757	Tm4sf19	transmembrane 4 L six family member 19 [Source:RGD Symbol;Acc:1560486]	2.01858	2.04802	1.63897	0.629435	1.17491	0.72064	2.25964	1.17609	up
GO:0016021	integral component of membrane	cellular_component	5	0.000278486	ENSRNOG00000002046	Cd200r1l	CD200 receptor 1-like [Source:RGD Symbol;Acc:1563387]	5.77038	3.90674	4.22352	2.19257	2.47716	1.07152	2.42119	1.27572	up
GO:0016021	integral component of membrane	cellular_component	5	0.000278486	ENSRNOG00000002303	Kcnj12	potassium voltage-gated channel subfamily J member 12 [Source:RGD Symbol;Acc:621660]	1.13507	0.91256	0.709237	2.64599	1.68286	2.79866	0.386793	-1.37037	down
GO:0016021	integral component of membrane	cellular_component	5	0.000278486	ENSRNOG00000002364	Rnf112	ring finger protein 112 [Source:RGD Symbol;Acc:3986]	0.268859	0.283787	0.444264	0.501704	1.23498	0.948211	0.371303	-1.42933	down
GO:0016021	integral component of membrane	cellular_component	5	0.000278486	ENSRNOG00000003580	Ucp1	uncoupling protein 1 [Source:RGD Symbol;Acc:3931]	0	0	0	0	0	12.6582	2.37001e-05	-15.3647	down
GO:0016021	integral component of membrane	cellular_component	5	0.000278486	ENSRNOG00000003732	Flrt2	fibronectin leucine rich transmembrane protein 2 [Source:RGD Symbol;Acc:1308574]	1.80281	2.04289	1.39731	3.1207	4.03324	3.75719	0.480519	-1.05733	down
GO:0016021	integral component of membrane	cellular_component	5	0.000278486	ENSRNOG00000004704	Dcstamp	dendrocyte expressed seven transmembrane protein [Source:RGD Symbol;Acc:1310435]	1.90901	1.69538	1.40776	0.538062	0.697165	0.21095	3.4658	1.79319	up
GO:0016021	integral component of membrane	cellular_component	5	0.000278486	ENSRNOG00000005114	Tmem74	transmembrane protein 74 [Source:RGD Symbol;Acc:1566279]	0.02941	0.038311	0.05188	0.912558	0.252146	0.376225	0.0776162	-3.6875	down
GO:0016021	integral component of membrane	cellular_component	5	0.000278486	ENSRNOG00000006723	Itga11	integrin subunit alpha 11 [Source:RGD Symbol;Acc:1311711]	0.445333	0.566447	0.898136	1.71316	1.51553	1.32386	0.419528	-1.25316	down
GO:0016021	integral component of membrane	cellular_component	5	0.000278486	ENSRNOG00000007865	Ephb1	Eph receptor B1 [Source:RGD Symbol;Acc:2556]	0.836464	0.793073	1.14742	0.471882	0.398737	0.218471	2.5498	1.35038	up
GO:0016021	integral component of membrane	cellular_component	5	0.000278486	ENSRNOG00000007951	Galnt14	polypeptide N-acetylgalactosaminyltransferase 14 [Source:RGD Symbol;Acc:1310068]	1.22288	1.53036	1.57812	0.196292	0.565801	0.096151	5.04677	2.33536	up
GO:0016021	integral component of membrane	cellular_component	5	0.000278486	ENSRNOG00000008098	Lrrc4	leucine rich repeat containing 4 [Source:RGD Symbol;Acc:1560026]	2.17239	1.99758	2.53782	5.27277	4.10377	5.20253	0.460097	-1.11999	down
GO:0016021	integral component of membrane	cellular_component	5	0.000278486	ENSRNOG00000008816	Gpnmb	glycoprotein nmb [Source:RGD Symbol;Acc:71008]	194.008	146.217	143.748	84.0387	88.9556	65.1415	2.03234	1.02314	up
GO:0016021	integral component of membrane	cellular_component	5	0.000278486	ENSRNOG00000009686	Aqp7	aquaporin 7 [Source:RGD Symbol;Acc:2145]	0.04156	0.071983	0.079689	0.169014	0.259968	3.27253	0.0522035	-4.25971	down
GO:0016021	integral component of membrane	cellular_component	5	0.000278486	ENSRNOG00000010263	Cldn11	claudin 11 [Source:RGD Symbol;Acc:71081]	2.68847	2.864	2.8561	5.43847	8.61906	7.68507	0.386732	-1.37059	down
GO:0016021	integral component of membrane	cellular_component	5	0.000278486	ENSRNOG00000011133	Trpc4	transient receptor potential cation channel, subfamily C, member 4 [Source:RGD Symbol;Acc:621276]	0.047885	0.130389	0.050748	0.258961	0.381343	0.332957	0.235314	-2.08734	down
GO:0016021	integral component of membrane	cellular_component	5	0.000278486	ENSRNOG00000012324	Soga3	SOGA family member 3 [Source:RGD Symbol;Acc:11479453]	0.978627	0.601285	0.868766	0.30792	0.18986	0.320749	2.99156	1.5809	up
GO:0016021	integral component of membrane	cellular_component	5	0.000278486	ENSRNOG00000012367	Pcdh7	protocadherin 7 [Source:RGD Symbol;Acc:1303209]	0.812085	0.617343	0.767092	1.37347	2.74181	1.534	0.388814	-1.36285	down
GO:0016021	integral component of membrane	cellular_component	5	0.000278486	ENSRNOG00000012674	Adrb3	adrenoceptor beta 3 [Source:RGD Symbol;Acc:2061]	0	0	0	0.089852	0.041841	1.01731	0.000261096	-11.9031	down
GO:0016021	integral component of membrane	cellular_component	5	0.000278486	ENSRNOG00000013306	Pcdh20	protocadherin 20 [Source:RGD Symbol;Acc:1306297]	0.199983	0.074123	0.181417	0.636184	0.284763	0.574304	0.304647	-1.71479	down
GO:0016021	integral component of membrane	cellular_component	5	0.000278486	ENSRNOG00000013578	Trem2	triggering receptor expressed on myeloid cells 2 [Source:RGD Symbol;Acc:1309841]	10.8948	5.01708	5.6079	3.19457	3.44342	4.12088	2.00019	1.00014	up
GO:0016021	integral component of membrane	cellular_component	5	0.000278486	ENSRNOG00000013887	Adra2b	adrenoceptor alpha 2B [Source:RGD Symbol;Acc:2057]	0.311704	0.246273	0.182689	0.886988	0.676955	1.17461	0.270458	-1.88652	down
GO:0016021	integral component of membrane	cellular_component	5	0.000278486	ENSRNOG00000014248	Erbb4	erb-b2 receptor tyrosine kinase 4 [Source:RGD Symbol;Acc:620486]	0.602772	0.820792	0.860173	0.247666	0.295959	0.240493	2.91249	1.54225	up
GO:0016021	integral component of membrane	cellular_component	5	0.000278486	ENSRNOG00000014265	Tnfrsf19	TNF receptor superfamily member 19 [Source:RGD Symbol;Acc:1564996]	0.292562	0.18351	0.32382	1.07666	0.397136	0.799481	0.351867	-1.5069	down
GO:0016021	integral component of membrane	cellular_component	5	0.000278486	ENSRNOG00000014398	Scara5	scavenger receptor class A, member 5 [Source:RGD Symbol;Acc:1306539]	2.21572	1.73413	2.82895	4.67709	3.10302	6.24355	0.483384	-1.04876	down
GO:0016021	integral component of membrane	cellular_component	5	0.000278486	ENSRNOG00000014465	Oca2	OCA2 melanosomal transmembrane protein [Source:RGD Symbol;Acc:2318412]	0	0	0	0.101048	0.120925	0.079096	0.000996449	-9.97092	down
GO:0016021	integral component of membrane	cellular_component	5	0.000278486	ENSRNOG00000014524	S1pr3	sphingosine-1-phosphate receptor 3 [Source:RGD Symbol;Acc:1583843]	9.98579	9.09143	8.73488	22.3581	16.5395	25.1183	0.434456	-1.20272	down
GO:0016021	integral component of membrane	cellular_component	5	0.000278486	ENSRNOG00000014691	Ric3	RIC3 acetylcholine receptor chaperone [Source:RGD Symbol;Acc:1588939]	0.888606	1.24696	0.624746	0.345167	0.236963	0.277397	3.21143	1.68322	up
GO:0016021	integral component of membrane	cellular_component	5	0.000278486	ENSRNOG00000014918	Klrg1	killer cell lectin like receptor G1 [Source:RGD Symbol;Acc:61978]	4.26076	7.30657	3.73	2.21767	1.5166	3.17449	2.21419	1.14678	up
GO:0016021	integral component of membrane	cellular_component	5	0.000278486	ENSRNOG00000015089	Mcoln2	mucolipin 2 [Source:RGD Symbol;Acc:1308884]	7.1303	6.82353	5.88089	3.61028	2.8491	3.26985	2.03867	1.02763	up
GO:0016021	integral component of membrane	cellular_component	5	0.000278486	ENSRNOG00000015763	Nat8f3	N-acetyltransferase 8 (GCN5-related) family member 3 [Source:RGD Symbol;Acc:621607]	1.70631	2.86391	2.56139	5.62887	3.47124	6.73715	0.450306	-1.15102	down
GO:0016021	integral component of membrane	cellular_component	5	0.000278486	ENSRNOG00000016070	Trpc3	transient receptor potential cation channel, subfamily C, member 3 [Source:RGD Symbol;Acc:61973]	0.998502	0.698946	0.823061	2.01864	2.08611	2.63759	0.373833	-1.41954	down
GO:0016021	integral component of membrane	cellular_component	5	0.000278486	ENSRNOG00000016177	Scara3	scavenger receptor class A, member 3 [Source:RGD Symbol;Acc:1309269]	5.49624	3.67234	4.02177	9.70825	9.66812	8.74041	0.469128	-1.09195	down
GO:0016021	integral component of membrane	cellular_component	5	0.000278486	ENSRNOG00000016949	Slc25a33	solute carrier family 25 member 33 [Source:RGD Symbol;Acc:1583942]	12.7926	13.8239	16.3486	29.8604	28.5655	33.4012	0.467891	-1.09576	down
GO:0016021	integral component of membrane	cellular_component	5	0.000278486	ENSRNOG00000017226	Slc2a4	solute carrier family 2 member 4 [Source:RGD Symbol;Acc:2711]	0.725115	0.747971	0.866538	1.38289	1.35574	3.8632	0.35439	-1.49659	down
GO:0016021	integral component of membrane	cellular_component	5	0.000278486	ENSRNOG00000018005	Duoxa1	dual oxidase maturation factor 1 [Source:RGD Symbol;Acc:1306601]	5.56049	2.15936	4.37417	1.58063	1.28771	1.77397	2.60517	1.38138	up
GO:0016021	integral component of membrane	cellular_component	5	0.000278486	ENSRNOG00000018644	Slc6a7	solute carrier family 6 member 7 [Source:RGD Symbol;Acc:620928]	1.38866	1.04448	0.392996	0.497343	0.247701	0.272771	2.77667	1.47335	up
GO:0016021	integral component of membrane	cellular_component	5	0.000278486	ENSRNOG00000018853	Slc28a3	solute carrier family 28 member 3 [Source:RGD Symbol;Acc:621224]	3.05653	3.81928	7.36752	12.4951	9.4451	10.0783	0.444846	-1.16862	down
GO:0016021	integral component of membrane	cellular_component	5	0.000278486	ENSRNOG00000019163	Syt6	synaptotagmin 6 [Source:RGD Symbol;Acc:62012]	0.1703	0.178842	0.252158	0.527108	0.644704	0.817466	0.30227	-1.72609	down
GO:0016021	integral component of membrane	cellular_component	5	0.000278486	ENSRNOG00000019921	Rhbdl1	rhomboid like 1 [Source:RGD Symbol;Acc:620699]	1.56641	1.24922	0.921898	2.1812	3.31834	2.41805	0.472054	-1.08298	down
GO:0016021	integral component of membrane	cellular_component	5	0.000278486	ENSRNOG00000019985	Asic4	acid sensing ion channel subunit family member 4 [Source:RGD Symbol;Acc:621068]	1.22068	0.713135	0.167016	0.140032	0.161282	0.09395	5.31501	2.41007	up
GO:0016021	integral component of membrane	cellular_component	5	0.000278486	ENSRNOG00000020054	LOC108348201	protocadherin beta-7-like [Source:RGD Symbol;Acc:11368541]	0.582061	0.474989	0.669141	1.45791	0.928726	1.18222	0.483683	-1.04787	down
GO:0016021	integral component of membrane	cellular_component	5	0.000278486	ENSRNOG00000020484	Trpm5	transient receptor potential cation channel, subfamily M, member 5 [Source:RGD Symbol;Acc:1310620]	5.99927	5.86911	10.0597	17.4263	11.9153	18.1559	0.461669	-1.11507	down
GO:0016021	integral component of membrane	cellular_component	5	0.000278486	ENSRNOG00000020953	Ms4a7	membrane spanning 4-domains A7 [Source:RGD Symbol;Acc:1305549]	0.648986	0.344616	0.486748	1.45936	0.792644	1.83048	0.362611	-1.46351	down
GO:0016021	integral component of membrane	cellular_component	5	0.000278486	ENSRNOG00000020980	AABR07006278		12.7744	12.0944	13.6112	6.62593	6.44403	5.53424	2.06835	1.04848	up
GO:0016021	integral component of membrane	cellular_component	5	0.000278486	ENSRNOG00000021256	Adra1d	adrenoceptor alpha 1D [Source:RGD Symbol;Acc:62064]	0.263536	0.619624	0.355989	1.74131	1.36148	1.17567	0.289625	-1.78774	down
GO:0016021	integral component of membrane	cellular_component	5	0.000278486	ENSRNOG00000022239	Trarg1	trafficking regulator of GLUT4 (SLC2A4) 1 [Source:RGD Symbol;Acc:1307639]	2.12065	2.24179	2.81453	5.40766	4.54121	9.15362	0.375708	-1.41232	down
GO:0016021	integral component of membrane	cellular_component	5	0.000278486	ENSRNOG00000025300	Fer1l6	fer-1-like family member 6 [Source:RGD Symbol;Acc:1564703]	0.0119834	0.0256819	0.0413083	0.345032	0.0490612	0.308355	0.112426	-3.15295	down
GO:0016021	integral component of membrane	cellular_component	5	0.000278486	ENSRNOG00000025476	Tmem252	transmembrane protein 252 [Source:RGD Symbol;Acc:1359349]	27.5989	27.3022	33.9055	45.5571	73.4687	68.909	0.47254	-1.08149	down
GO:0016021	integral component of membrane	cellular_component	5	0.000278486	ENSRNOG00000025670	Shisa3	shisa family member 3 [Source:RGD Symbol;Acc:1565710]	0	0	0	0.143603	0.113998	0.080675	0.00088685	-10.139	down
GO:0016021	integral component of membrane	cellular_component	5	0.000278486	ENSRNOG00000026061	Sirpb3	signal-regulatory protein beta 3 [Source:RGD Symbol;Acc:1566226]	2.12654	0.819535	1.51799	4.73302	2.62538	3.40954	0.41457	-1.27031	down
GO:0016021	integral component of membrane	cellular_component	5	0.000278486	ENSRNOG00000026661	Hcar1	hydroxycarboxylic acid receptor 1 [Source:RGD Symbol;Acc:1586364]	0	0	0.029443	0.149024	0.059517	0.789164	0.0295107	-5.08262	down
GO:0016021	integral component of membrane	cellular_component	5	0.000278486	ENSRNOG00000026989	Gapt	Grb2-binding adaptor protein, transmembrane [Source:RGD Symbol;Acc:1586621]	0.952751	1.66357	1.71694	0.780461	0.541978	0.649122	2.19788	1.13611	up
GO:0016021	integral component of membrane	cellular_component	5	0.000278486	ENSRNOG00000027767	Slc38a5	solute carrier family 38, member 5 [Source:RGD Symbol;Acc:620702]	3.29864	4.26098	4.74245	7.87061	7.30095	9.9667	0.489376	-1.03098	down
GO:0016021	integral component of membrane	cellular_component	5	0.000278486	ENSRNOG00000029342	Scn7a	sodium voltage-gated channel alpha subunit 7 [Source:RGD Symbol;Acc:61922]	11.5574	9.24312	13.5523	34.1139	29.6192	24.4067	0.389754	-1.35936	down
GO:0016021	integral component of membrane	cellular_component	5	0.000278486	ENSRNOG00000029644	Clec2l	C-type lectin domain family 2, member L [Source:RGD Symbol;Acc:1565373]	1.20902	0.984596	0.764145	6.04306	6.28006	5.00909	0.170651	-2.55088	down
GO:0016021	integral component of membrane	cellular_component	5	0.000278486	ENSRNOG00000030431	RT1-Db2	RT1 class II, locus Db2 [Source:RGD Symbol;Acc:1595922]	3.57562	1.76437	1.09238	0.503178	0.344361	1.19923	3.14269	1.652	up
GO:0016021	integral component of membrane	cellular_component	5	0.000278486	ENSRNOG00000031849	Armh4	armadillo-like helical domain containing 4 [Source:RGD Symbol;Acc:1310110]	0.572696	0.421501	0.535934	1.94215	1.26676	1.60099	0.318121	-1.65235	down
GO:0016021	integral component of membrane	cellular_component	5	0.000278486	ENSRNOG00000032417	Gabrp	gamma-aminobutyric acid type A receptor pi subunit [Source:RGD Symbol;Acc:620532]	0.092348	0.19525	0.36241	0.951681	0.704935	1.06596	0.238747	-2.06644	down
GO:0016021	integral component of membrane	cellular_component	5	0.000278486	ENSRNOG00000033348	Duox1	dual oxidase 1 [Source:RGD Symbol;Acc:628760]	4.03322	2.15876	3.55853	1.38054	1.11797	1.15612	2.668	1.41576	up
GO:0016021	integral component of membrane	cellular_component	5	0.000278486	ENSRNOG00000036984	Slco1a1	solute carrier organic anion transporter family, member 1a1 [Source:RGD Symbol;Acc:3700]	0.270199	0.433603	0.341127	0.058162	0.110115	0.019966	5.55096	2.47274	up
GO:0016021	integral component of membrane	cellular_component	5	0.000278486	ENSRNOG00000039759	Gpr34	G protein-coupled receptor 34 [Source:RGD Symbol;Acc:1563681]	2.33313	1.48465	2.24688	1.08496	0.821155	0.91494	2.14978	1.10419	up
GO:0016021	integral component of membrane	cellular_component	5	0.000278486	ENSRNOG00000045888	RGD1562667	similar to leukocyte mono-Ig-like receptor2 [Source:RGD Symbol;Acc:1562667]	8.06814	17.2991	8.47844	5.34585	2.64176	6.28168	2.37192	1.24606	up
GO:0016021	integral component of membrane	cellular_component	5	0.000278486	ENSRNOG00000046239	LOC100909612	mitochondrial brown fat uncoupling protein 1-like [Source:RGD Symbol;Acc:6502621]	0	0	0	0	0	5.27305	5.68931e-05	-14.1014	down
GO:0016021	integral component of membrane	cellular_component	5	0.000278486	ENSRNOG00000048145	Sstr1	somatostatin receptor 1 [Source:RGD Symbol;Acc:3762]	1.29021	1.61171	1.86831	0.504885	0.640927	0.601976	2.72929	1.44853	up
GO:0016021	integral component of membrane	cellular_component	5	0.000278486	ENSRNOG00000048239	Cxcr1	C-X-C motif chemokine receptor 1 [Source:RGD Symbol;Acc:2905]	16.0266	13.947	11.851	5.02716	3.39089	4.10572	3.33962	1.73968	up
GO:0016021	integral component of membrane	cellular_component	5	0.000278486	ENSRNOG00000049351	Nat8l	N-acetyltransferase 8-like [Source:RGD Symbol;Acc:1305719]	0.414609	0.359825	0.569127	1.06015	0.774246	1.71601	0.378425	-1.40192	down
GO:0016021	integral component of membrane	cellular_component	5	0.000278486	ENSRNOG00000049590	RT1-M2	RT1 class Ib, locus M2 [Source:RGD Symbol;Acc:3493]	1.05738	0.72803	0.844597	0.257868	0	0.133657	6.71734	2.74789	up
GO:0016021	integral component of membrane	cellular_component	5	0.000278486	ENSRNOG00000052486	Kcna6	potassium voltage-gated channel subfamily A member 6 [Source:RGD Symbol;Acc:62083]	0.206521	0.495587	0.476457	0.150545	0.128976	0.104822	3.06644	1.61657	up
GO:0016021	integral component of membrane	cellular_component	5	0.000278486	ENSRNOG00000053232	Ror2	receptor tyrosine kinase-like orphan receptor 2 [Source:RGD Symbol;Acc:1305275]	0.93753	0.843785	1.20048	2.20838	2.23265	2.21271	0.448138	-1.15799	down
GO:0016021	integral component of membrane	cellular_component	5	0.000278486	ENSRNOG00000054438	LOC292543	similar to solute carrier family 7 (cationic amino acid transporter, y+ system), member 3 [Source:RGD Symbol;Acc:1565097]	0.528722	0.612372	0.29992	0.047019	0.128095	0.082842	5.58628	2.48189	up
GO:0016021	integral component of membrane	cellular_component	5	0.000278486	ENSRNOG00000055103	Cftr	cystic fibrosis transmembrane conductance regulator [Source:RGD Symbol;Acc:2332]	1.14851	0.941143	0.718715	2.41175	2.46834	1.29678	0.454659	-1.13714	down
GO:0016021	integral component of membrane	cellular_component	5	0.000278486	ENSRNOG00000056697	Kcnab1	potassium voltage-gated channel subfamily A member regulatory beta subunit 1 [Source:RGD Symbol;Acc:61827]	3.31095	2.45264	1.755	1.07741	1.03743	1.28351	2.21242	1.14563	up
GO:0016021	integral component of membrane	cellular_component	5	0.000278486	ENSRNOG00000057189	LOC103690326	dendritic cell-specific transmembrane protein [Source:RGD Symbol;Acc:9418155]	2.02057	1.81366	1.48448	0.681452	0.577721	0.225501	3.58241	1.84093	up
GO:0016021	integral component of membrane	cellular_component	5	0.000278486	ENSRNOG00000057221	Scn3b	sodium voltage-gated channel beta subunit 3 [Source:RGD Symbol;Acc:621657]	21.0976	17.1091	25.2416	51.1686	32.1861	48.604	0.480819	-1.05643	down
GO:0016021	integral component of membrane	cellular_component	5	0.000278486	ENSRNOG00000057643	Klri2	killer cell lectin-like receptor family I member 2 [Source:RGD Symbol;Acc:1359205]	4.15407	4.85632	2.9182	1.3324	0.727116	2.385	2.68389	1.42433	up
GO:0016021	integral component of membrane	cellular_component	5	0.000278486	ENSRNOG00000058692	Slc26a4	solute carrier family 26 member 4 [Source:RGD Symbol;Acc:3293]	2.67212	1.9953	1.15691	1.03707	0.715431	0.934049	2.16796	1.11634	up
GO:0016021	integral component of membrane	cellular_component	5	0.000278486	ENSRNOG00000060246	Klrd1	killer cell lectin like receptor D1 [Source:RGD Symbol;Acc:2978]	13.655	21.5233	11.2525	7.56228	4.74204	9.73844	2.1064	1.07478	up
GO:0016021	integral component of membrane	cellular_component	5	0.000278486	ENSRNOG00000060831	Clca1	chloride channel accessory 1 [Source:RGD Symbol;Acc:1306258]	0.066168	0.138958	0.180644	1.43964	0.094998	1.08019	0.147532	-2.7609	down
GO:0005272	sodium channel activity	molecular_function	8	0.000329216	ENSRNOG00000019985	Asic4	acid sensing ion channel subunit family member 4 [Source:RGD Symbol;Acc:621068]	1.22068	0.713135	0.167016	0.140032	0.161282	0.09395	5.31501	2.41007	up
GO:0005272	sodium channel activity	molecular_function	8	0.000329216	ENSRNOG00000020484	Trpm5	transient receptor potential cation channel, subfamily M, member 5 [Source:RGD Symbol;Acc:1310620]	5.99927	5.86911	10.0597	17.4263	11.9153	18.1559	0.461669	-1.11507	down
GO:0005272	sodium channel activity	molecular_function	8	0.000329216	ENSRNOG00000029342	Scn7a	sodium voltage-gated channel alpha subunit 7 [Source:RGD Symbol;Acc:61922]	11.5574	9.24312	13.5523	34.1139	29.6192	24.4067	0.389754	-1.35936	down
GO:0005272	sodium channel activity	molecular_function	8	0.000329216	ENSRNOG00000057221	Scn3b	sodium voltage-gated channel beta subunit 3 [Source:RGD Symbol;Acc:621657]	21.0976	17.1091	25.2416	51.1686	32.1861	48.604	0.480819	-1.05643	down
GO:0004935	adrenergic receptor activity	molecular_function	8	0.000345979	ENSRNOG00000012674	Adrb3	adrenoceptor beta 3 [Source:RGD Symbol;Acc:2061]	0	0	0	0.089852	0.041841	1.01731	0.000261096	-11.9031	down
GO:0004935	adrenergic receptor activity	molecular_function	8	0.000345979	ENSRNOG00000013887	Adra2b	adrenoceptor alpha 2B [Source:RGD Symbol;Acc:2057]	0.311704	0.246273	0.182689	0.886988	0.676955	1.17461	0.270458	-1.88652	down
GO:0004935	adrenergic receptor activity	molecular_function	8	0.000345979	ENSRNOG00000021256	Adra1d	adrenoceptor alpha 1D [Source:RGD Symbol;Acc:62064]	0.263536	0.619624	0.355989	1.74131	1.36148	1.17567	0.289625	-1.78774	down
GO:0005604	basement membrane	cellular_component	6	0.000373281	ENSRNOG00000000341	Nid2	nidogen 2 [Source:RGD Symbol;Acc:1311685]	2.31282	2.30347	2.63372	6.44043	3.59282	6.79857	0.430732	-1.21514	down
GO:0005604	basement membrane	cellular_component	6	0.000373281	ENSRNOG00000002461	Nid1	nidogen 1 [Source:RGD Symbol;Acc:3178]	7.0868	7.3753	8.23495	25.6053	16.1071	15.6315	0.395806	-1.33713	down
GO:0005604	basement membrane	cellular_component	6	0.000373281	ENSRNOG00000011134	Lama2	laminin subunit alpha 2 [Source:RGD Symbol;Acc:1308889]	2.28319	2.43893	3.8991	6.65355	4.97214	6.4225	0.477678	-1.06589	down
GO:0005604	basement membrane	cellular_component	6	0.000373281	ENSRNOG00000012058	Egflam	EGF-like, fibronectin type III and laminin G domains [Source:RGD Symbol;Acc:1306592]	2.05351	2.02171	3.25163	5.82235	4.33722	6.77696	0.432607	-1.20887	down
GO:0005604	basement membrane	cellular_component	6	0.000373281	ENSRNOG00000039197	LOC108348074	collagen alpha-1(XV) chain-like [Source:RGD Symbol;Acc:11464459]	2.9943	2.28433	4.771	10.5648	7.14882	12.7016	0.330415	-1.59765	down
GO:0005604	basement membrane	cellular_component	6	0.000373281	ENSRNOG00000060381	Col15a1	collagen type XV alpha 1 chain [Source:RGD Symbol;Acc:1310820]	2.72355	3.70059	6.38776	17.7121	9.88001	14.3242	0.305655	-1.71003	down
GO:0007223	Wnt signaling pathway, calcium modulating pathway	biological_process	9	0.000426499	ENSRNOG00000015618	Wnt5a	Wnt family member 5A [Source:RGD Symbol;Acc:69250]	3.0348	2.5955	2.2052	6.68335	4.54321	6.14645	0.451016	-1.14875	down
GO:0007223	Wnt signaling pathway, calcium modulating pathway	biological_process	9	0.000426499	ENSRNOG00000053232	Ror2	receptor tyrosine kinase-like orphan receptor 2 [Source:RGD Symbol;Acc:1305275]	0.93753	0.843785	1.20048	2.20838	2.23265	2.21271	0.448138	-1.15799	down
GO:0070098	chemokine-mediated signaling pathway	biological_process	7	0.000465572	ENSRNOG00000002792	Cxcl2	C-X-C motif chemokine ligand 2 [Source:RGD Symbol;Acc:70069]	2.49155	1.56141	2.22508	0.21844	0.639161	0.597588	4.31425	2.10911	up
GO:0070098	chemokine-mediated signaling pathway	biological_process	7	0.000465572	ENSRNOG00000022242	Cxcl9	C-X-C motif chemokine ligand 9 [Source:RGD Symbol;Acc:628798]	6.90616	5.99513	4.70513	2.639	3.00671	2.71353	2.10622	1.07466	up
GO:0070098	chemokine-mediated signaling pathway	biological_process	7	0.000465572	ENSRNOG00000024899	Cxcl13	C-X-C motif chemokine ligand 13 [Source:RGD Symbol;Acc:1564256]	0.505115	0.912997	2.0192	4.23093	3.68046	3.58254	0.299054	-1.74152	down
GO:0070098	chemokine-mediated signaling pathway	biological_process	7	0.000465572	ENSRNOG00000028548	Ccl9	chemokine (C-C motif) ligand 9 [Source:RGD Symbol;Acc:1310563]	37.5481	17.7937	27.4866	12.7972	13.0843	8.17364	2.43218	1.28225	up
GO:0070098	chemokine-mediated signaling pathway	biological_process	7	0.000465572	ENSRNOG00000048239	Cxcr1	C-X-C motif chemokine receptor 1 [Source:RGD Symbol;Acc:2905]	16.0266	13.947	11.851	5.02716	3.39089	4.10572	3.33962	1.73968	up
GO:0005581	collagen trimer	cellular_component	4	0.000507186	ENSRNOG00000001821	Adipoq	adiponectin, C1Q and collagen domain containing [Source:RGD Symbol;Acc:628748]	0.269142	0.528074	0.422021	2.31808	1.93395	13.321	0.0693811	-3.84931	down
GO:0005581	collagen trimer	cellular_component	4	0.000507186	ENSRNOG00000003357	Col3a1	collagen type III alpha 1 chain [Source:RGD Symbol;Acc:71029]	156.474	148.568	159.465	332.712	580.742	362.723	0.363983	-1.45806	down
GO:0005581	collagen trimer	cellular_component	4	0.000507186	ENSRNOG00000003897	Col1a1	collagen type I alpha 1 chain [Source:RGD Symbol;Acc:61817]	21.9343	20.0594	21.0288	58.1167	63.4283	51.677	0.363825	-1.45869	down
GO:0005581	collagen trimer	cellular_component	4	0.000507186	ENSRNOG00000039197	LOC108348074	collagen alpha-1(XV) chain-like [Source:RGD Symbol;Acc:11464459]	2.9943	2.28433	4.771	10.5648	7.14882	12.7016	0.330415	-1.59765	down
GO:0005581	collagen trimer	cellular_component	4	0.000507186	ENSRNOG00000060381	Col15a1	collagen type XV alpha 1 chain [Source:RGD Symbol;Acc:1310820]	2.72355	3.70059	6.38776	17.7121	9.88001	14.3242	0.305655	-1.71003	down
GO:0035725	sodium ion transmembrane transport	biological_process	10	0.000648904	ENSRNOG00000018853	Slc28a3	solute carrier family 28 member 3 [Source:RGD Symbol;Acc:621224]	3.05653	3.81928	7.36752	12.4951	9.4451	10.0783	0.444846	-1.16862	down
GO:0035725	sodium ion transmembrane transport	biological_process	10	0.000648904	ENSRNOG00000019985	Asic4	acid sensing ion channel subunit family member 4 [Source:RGD Symbol;Acc:621068]	1.22068	0.713135	0.167016	0.140032	0.161282	0.09395	5.31501	2.41007	up
GO:0035725	sodium ion transmembrane transport	biological_process	10	0.000648904	ENSRNOG00000020484	Trpm5	transient receptor potential cation channel, subfamily M, member 5 [Source:RGD Symbol;Acc:1310620]	5.99927	5.86911	10.0597	17.4263	11.9153	18.1559	0.461669	-1.11507	down
GO:0035725	sodium ion transmembrane transport	biological_process	10	0.000648904	ENSRNOG00000029342	Scn7a	sodium voltage-gated channel alpha subunit 7 [Source:RGD Symbol;Acc:61922]	11.5574	9.24312	13.5523	34.1139	29.6192	24.4067	0.389754	-1.35936	down
GO:0035725	sodium ion transmembrane transport	biological_process	10	0.000648904	ENSRNOG00000057221	Scn3b	sodium voltage-gated channel beta subunit 3 [Source:RGD Symbol;Acc:621657]	21.0976	17.1091	25.2416	51.1686	32.1861	48.604	0.480819	-1.05643	down
GO:0008626	granzyme-mediated apoptotic signaling pathway	biological_process	6	0.000696768	ENSRNOG00000046301	Gzmbl3	Granzyme B-like 3 [Source:RGD Symbol;Acc:2320502]	9.5866	12.0134	9.17037	1.23861	0.386529	2.4398	7.56969	2.92023	up
GO:0008626	granzyme-mediated apoptotic signaling pathway	biological_process	6	0.000696768	ENSRNOG00000049919	LOC691670	similar to natural killer cell protease 7 [Source:RGD Symbol;Acc:1597224]	0.825562	1.04608	0.608183	0	0.175413	0.15399	7.52826	2.91232	up
GO:0008626	granzyme-mediated apoptotic signaling pathway	biological_process	6	0.000696768	ENSRNOG00000050198	Gzmbl1	Granszyme B-like 1 [Source:RGD Symbol;Acc:1561819]	1.6177	4.11414	2.13787	0.277909	0.052331	0.237429	13.8632	3.79319	up
GO:0050999	regulation of nitric-oxide synthase activity	biological_process	8	0.000846243	ENSRNOG00000004649	Il1b	interleukin 1 beta [Source:RGD Symbol;Acc:2891]	20.4545	17.8629	26.638	9.01274	9.02768	13.4852	2.0604	1.04293	up
GO:0050999	regulation of nitric-oxide synthase activity	biological_process	8	0.000846243	ENSRNOG00000045797	Lep	leptin [Source:RGD Symbol;Acc:3000]	0.038354	0.031345	0.037116	0.113483	0.270256	1.22499	0.0663972	-3.91273	down
GO:0001515	opioid peptide activity	molecular_function	7	0.000846243	ENSRNOG00000008943	Penk	proenkephalin [Source:RGD Symbol;Acc:68946]	1.132	1.55783	3.43566	0.621514	0.959967	0.863637	2.50519	1.32492	up
GO:0001515	opioid peptide activity	molecular_function	7	0.000846243	ENSRNOG00000020904	Cdc42ep2	CDC42 effector protein 2 [Source:RGD Symbol;Acc:1310253]	16.1048	13.5876	19.8116	27.6602	36.9112	34.8229	0.498057	-1.00562	down
GO:1900020	positive regulation of protein kinase C activity	biological_process	13	0.000846243	ENSRNOG00000015618	Wnt5a	Wnt family member 5A [Source:RGD Symbol;Acc:69250]	3.0348	2.5955	2.2052	6.68335	4.54321	6.14645	0.451016	-1.14875	down
GO:1900020	positive regulation of protein kinase C activity	biological_process	13	0.000846243	ENSRNOG00000053232	Ror2	receptor tyrosine kinase-like orphan receptor 2 [Source:RGD Symbol;Acc:1305275]	0.93753	0.843785	1.20048	2.20838	2.23265	2.21271	0.448138	-1.15799	down
GO:1990542	mitochondrial transmembrane transport	biological_process	7	0.000846243	ENSRNOG00000003580	Ucp1	uncoupling protein 1 [Source:RGD Symbol;Acc:3931]	0	0	0	0	0	12.6582	2.37001e-05	-15.3647	down
GO:1990542	mitochondrial transmembrane transport	biological_process	7	0.000846243	ENSRNOG00000046239	LOC100909612	mitochondrial brown fat uncoupling protein 1-like [Source:RGD Symbol;Acc:6502621]	0	0	0	0	0	5.27305	5.68931e-05	-14.1014	down
GO:0017077	oxidative phosphorylation uncoupler activity	molecular_function	5	0.000846243	ENSRNOG00000003580	Ucp1	uncoupling protein 1 [Source:RGD Symbol;Acc:3931]	0	0	0	0	0	12.6582	2.37001e-05	-15.3647	down
GO:0017077	oxidative phosphorylation uncoupler activity	molecular_function	5	0.000846243	ENSRNOG00000046239	LOC100909612	mitochondrial brown fat uncoupling protein 1-like [Source:RGD Symbol;Acc:6502621]	0	0	0	0	0	5.27305	5.68931e-05	-14.1014	down
GO:0030595	leukocyte chemotaxis	biological_process	5	0.00102305	ENSRNOG00000002792	Cxcl2	C-X-C motif chemokine ligand 2 [Source:RGD Symbol;Acc:70069]	2.49155	1.56141	2.22508	0.21844	0.639161	0.597588	4.31425	2.10911	up
GO:0030595	leukocyte chemotaxis	biological_process	5	0.00102305	ENSRNOG00000022242	Cxcl9	C-X-C motif chemokine ligand 9 [Source:RGD Symbol;Acc:628798]	6.90616	5.99513	4.70513	2.639	3.00671	2.71353	2.10622	1.07466	up
GO:0030595	leukocyte chemotaxis	biological_process	5	0.00102305	ENSRNOG00000024899	Cxcl13	C-X-C motif chemokine ligand 13 [Source:RGD Symbol;Acc:1564256]	0.505115	0.912997	2.0192	4.23093	3.68046	3.58254	0.299054	-1.74152	down
GO:0006811	ion transport	biological_process	6	0.00116202	ENSRNOG00000002303	Kcnj12	potassium voltage-gated channel subfamily J member 12 [Source:RGD Symbol;Acc:621660]	1.13507	0.91256	0.709237	2.64599	1.68286	2.79866	0.386793	-1.37037	down
GO:0006811	ion transport	biological_process	6	0.00116202	ENSRNOG00000003580	Ucp1	uncoupling protein 1 [Source:RGD Symbol;Acc:3931]	0	0	0	0	0	12.6582	2.37001e-05	-15.3647	down
GO:0006811	ion transport	biological_process	6	0.00116202	ENSRNOG00000011133	Trpc4	transient receptor potential cation channel, subfamily C, member 4 [Source:RGD Symbol;Acc:621276]	0.047885	0.130389	0.050748	0.258961	0.381343	0.332957	0.235314	-2.08734	down
GO:0006811	ion transport	biological_process	6	0.00116202	ENSRNOG00000014398	Scara5	scavenger receptor class A, member 5 [Source:RGD Symbol;Acc:1306539]	2.21572	1.73413	2.82895	4.67709	3.10302	6.24355	0.483384	-1.04876	down
GO:0006811	ion transport	biological_process	6	0.00116202	ENSRNOG00000016070	Trpc3	transient receptor potential cation channel, subfamily C, member 3 [Source:RGD Symbol;Acc:61973]	0.998502	0.698946	0.823061	2.01864	2.08611	2.63759	0.373833	-1.41954	down
GO:0006811	ion transport	biological_process	6	0.00116202	ENSRNOG00000019985	Asic4	acid sensing ion channel subunit family member 4 [Source:RGD Symbol;Acc:621068]	1.22068	0.713135	0.167016	0.140032	0.161282	0.09395	5.31501	2.41007	up
GO:0006811	ion transport	biological_process	6	0.00116202	ENSRNOG00000020484	Trpm5	transient receptor potential cation channel, subfamily M, member 5 [Source:RGD Symbol;Acc:1310620]	5.99927	5.86911	10.0597	17.4263	11.9153	18.1559	0.461669	-1.11507	down
GO:0006811	ion transport	biological_process	6	0.00116202	ENSRNOG00000029342	Scn7a	sodium voltage-gated channel alpha subunit 7 [Source:RGD Symbol;Acc:61922]	11.5574	9.24312	13.5523	34.1139	29.6192	24.4067	0.389754	-1.35936	down
GO:0006811	ion transport	biological_process	6	0.00116202	ENSRNOG00000032417	Gabrp	gamma-aminobutyric acid type A receptor pi subunit [Source:RGD Symbol;Acc:620532]	0.092348	0.19525	0.36241	0.951681	0.704935	1.06596	0.238747	-2.06644	down
GO:0006811	ion transport	biological_process	6	0.00116202	ENSRNOG00000036984	Slco1a1	solute carrier organic anion transporter family, member 1a1 [Source:RGD Symbol;Acc:3700]	0.270199	0.433603	0.341127	0.058162	0.110115	0.019966	5.55096	2.47274	up
GO:0006811	ion transport	biological_process	6	0.00116202	ENSRNOG00000052486	Kcna6	potassium voltage-gated channel subfamily A member 6 [Source:RGD Symbol;Acc:62083]	0.206521	0.495587	0.476457	0.150545	0.128976	0.104822	3.06644	1.61657	up
GO:0006811	ion transport	biological_process	6	0.00116202	ENSRNOG00000055103	Cftr	cystic fibrosis transmembrane conductance regulator [Source:RGD Symbol;Acc:2332]	1.14851	0.941143	0.718715	2.41175	2.46834	1.29678	0.454659	-1.13714	down
GO:0006811	ion transport	biological_process	6	0.00116202	ENSRNOG00000056697	Kcnab1	potassium voltage-gated channel subfamily A member regulatory beta subunit 1 [Source:RGD Symbol;Acc:61827]	3.31095	2.45264	1.755	1.07741	1.03743	1.28351	2.21242	1.14563	up
GO:0006811	ion transport	biological_process	6	0.00116202	ENSRNOG00000057221	Scn3b	sodium voltage-gated channel beta subunit 3 [Source:RGD Symbol;Acc:621657]	21.0976	17.1091	25.2416	51.1686	32.1861	48.604	0.480819	-1.05643	down
GO:0005886	plasma membrane	cellular_component	4	0.0011937	ENSRNOG00000000341	Nid2	nidogen 2 [Source:RGD Symbol;Acc:1311685]	2.31282	2.30347	2.63372	6.44043	3.59282	6.79857	0.430732	-1.21514	down
GO:0005886	plasma membrane	cellular_component	4	0.0011937	ENSRNOG00000000700	Tmem119	transmembrane protein 119 [Source:RGD Symbol;Acc:1307573]	6.59079	6.90106	6.28528	11.3215	14.3882	15.1594	0.483913	-1.04718	down
GO:0005886	plasma membrane	cellular_component	4	0.0011937	ENSRNOG00000002364	Rnf112	ring finger protein 112 [Source:RGD Symbol;Acc:3986]	0.268859	0.283787	0.444264	0.501704	1.23498	0.948211	0.371303	-1.42933	down
GO:0005886	plasma membrane	cellular_component	4	0.0011937	ENSRNOG00000003732	Flrt2	fibronectin leucine rich transmembrane protein 2 [Source:RGD Symbol;Acc:1308574]	1.80281	2.04289	1.39731	3.1207	4.03324	3.75719	0.480519	-1.05733	down
GO:0005886	plasma membrane	cellular_component	4	0.0011937	ENSRNOG00000007865	Ephb1	Eph receptor B1 [Source:RGD Symbol;Acc:2556]	0.836464	0.793073	1.14742	0.471882	0.398737	0.218471	2.5498	1.35038	up
GO:0005886	plasma membrane	cellular_component	4	0.0011937	ENSRNOG00000008001	Rab3b	RAB3B, member RAS oncogene family [Source:RGD Symbol;Acc:620922]	2.76153	1.88236	3.18417	4.52952	5.74434	6.11997	0.4775	-1.06643	down
GO:0005886	plasma membrane	cellular_component	4	0.0011937	ENSRNOG00000008098	Lrrc4	leucine rich repeat containing 4 [Source:RGD Symbol;Acc:1560026]	2.17239	1.99758	2.53782	5.27277	4.10377	5.20253	0.460097	-1.11999	down
GO:0005886	plasma membrane	cellular_component	4	0.0011937	ENSRNOG00000008816	Gpnmb	glycoprotein nmb [Source:RGD Symbol;Acc:71008]	194.008	146.217	143.748	84.0387	88.9556	65.1415	2.03234	1.02314	up
GO:0005886	plasma membrane	cellular_component	4	0.0011937	ENSRNOG00000008943	Penk	proenkephalin [Source:RGD Symbol;Acc:68946]	1.132	1.55783	3.43566	0.621514	0.959967	0.863637	2.50519	1.32492	up
GO:0005886	plasma membrane	cellular_component	4	0.0011937	ENSRNOG00000009686	Aqp7	aquaporin 7 [Source:RGD Symbol;Acc:2145]	0.04156	0.071983	0.079689	0.169014	0.259968	3.27253	0.0522035	-4.25971	down
GO:0005886	plasma membrane	cellular_component	4	0.0011937	ENSRNOG00000010263	Cldn11	claudin 11 [Source:RGD Symbol;Acc:71081]	2.68847	2.864	2.8561	5.43847	8.61906	7.68507	0.386732	-1.37059	down
GO:0005886	plasma membrane	cellular_component	4	0.0011937	ENSRNOG00000011133	Trpc4	transient receptor potential cation channel, subfamily C, member 4 [Source:RGD Symbol;Acc:621276]	0.047885	0.130389	0.050748	0.258961	0.381343	0.332957	0.235314	-2.08734	down
GO:0005886	plasma membrane	cellular_component	4	0.0011937	ENSRNOG00000012367	Pcdh7	protocadherin 7 [Source:RGD Symbol;Acc:1303209]	0.812085	0.617343	0.767092	1.37347	2.74181	1.534	0.388814	-1.36285	down
GO:0005886	plasma membrane	cellular_component	4	0.0011937	ENSRNOG00000012674	Adrb3	adrenoceptor beta 3 [Source:RGD Symbol;Acc:2061]	0	0	0	0.089852	0.041841	1.01731	0.000261096	-11.9031	down
GO:0005886	plasma membrane	cellular_component	4	0.0011937	ENSRNOG00000013306	Pcdh20	protocadherin 20 [Source:RGD Symbol;Acc:1306297]	0.199983	0.074123	0.181417	0.636184	0.284763	0.574304	0.304647	-1.71479	down
GO:0005886	plasma membrane	cellular_component	4	0.0011937	ENSRNOG00000013578	Trem2	triggering receptor expressed on myeloid cells 2 [Source:RGD Symbol;Acc:1309841]	10.8948	5.01708	5.6079	3.19457	3.44342	4.12088	2.00019	1.00014	up
GO:0005886	plasma membrane	cellular_component	4	0.0011937	ENSRNOG00000013736	C9	complement C9 [Source:RGD Symbol;Acc:620319]	0.095381	0.17503	0.090134	1.08752	0.317408	0.991207	0.150469	-2.73246	down
GO:0005886	plasma membrane	cellular_component	4	0.0011937	ENSRNOG00000013887	Adra2b	adrenoceptor alpha 2B [Source:RGD Symbol;Acc:2057]	0.311704	0.246273	0.182689	0.886988	0.676955	1.17461	0.270458	-1.88652	down
GO:0005886	plasma membrane	cellular_component	4	0.0011937	ENSRNOG00000014265	Tnfrsf19	TNF receptor superfamily member 19 [Source:RGD Symbol;Acc:1564996]	0.292562	0.18351	0.32382	1.07666	0.397136	0.799481	0.351867	-1.5069	down
GO:0005886	plasma membrane	cellular_component	4	0.0011937	ENSRNOG00000014398	Scara5	scavenger receptor class A, member 5 [Source:RGD Symbol;Acc:1306539]	2.21572	1.73413	2.82895	4.67709	3.10302	6.24355	0.483384	-1.04876	down
GO:0005886	plasma membrane	cellular_component	4	0.0011937	ENSRNOG00000014524	S1pr3	sphingosine-1-phosphate receptor 3 [Source:RGD Symbol;Acc:1583843]	9.98579	9.09143	8.73488	22.3581	16.5395	25.1183	0.434456	-1.20272	down
GO:0005886	plasma membrane	cellular_component	4	0.0011937	ENSRNOG00000014918	Klrg1	killer cell lectin like receptor G1 [Source:RGD Symbol;Acc:61978]	4.26076	7.30657	3.73	2.21767	1.5166	3.17449	2.21419	1.14678	up
GO:0005886	plasma membrane	cellular_component	4	0.0011937	ENSRNOG00000016695	Mmp2	matrix metallopeptidase 2 [Source:RGD Symbol;Acc:621316]	30.7938	26.2646	32.2348	67.5082	55.093	74.8328	0.452269	-1.14475	down
GO:0005886	plasma membrane	cellular_component	4	0.0011937	ENSRNOG00000016696	Angpt2	angiopoietin 2 [Source:RGD Symbol;Acc:621861]	3.01199	2.77709	3.05503	7.45684	6.76239	7.96137	0.398732	-1.32651	down
GO:0005886	plasma membrane	cellular_component	4	0.0011937	ENSRNOG00000016724	Epb41l3	erythrocyte membrane protein band 4.1-like 3 [Source:RGD Symbol;Acc:71089]	0.323093	0.245497	0.361631	0.556784	0.869599	1.02498	0.37947	-1.39794	down
GO:0005886	plasma membrane	cellular_component	4	0.0011937	ENSRNOG00000017226	Slc2a4	solute carrier family 2 member 4 [Source:RGD Symbol;Acc:2711]	0.725115	0.747971	0.866538	1.38289	1.35574	3.8632	0.35439	-1.49659	down
GO:0005886	plasma membrane	cellular_component	4	0.0011937	ENSRNOG00000018005	Duoxa1	dual oxidase maturation factor 1 [Source:RGD Symbol;Acc:1306601]	5.56049	2.15936	4.37417	1.58063	1.28771	1.77397	2.60517	1.38138	up
GO:0005886	plasma membrane	cellular_component	4	0.0011937	ENSRNOG00000018978	Scart1	scavenger receptor family member expressed on T-cells 1 [Source:RGD Symbol;Acc:1307378]	2.38235	3.22753	0.914079	0.607067	0.571033	0.709445	3.45632	1.78924	up
GO:0005886	plasma membrane	cellular_component	4	0.0011937	ENSRNOG00000019163	Syt6	synaptotagmin 6 [Source:RGD Symbol;Acc:62012]	0.1703	0.178842	0.252158	0.527108	0.644704	0.817466	0.30227	-1.72609	down
GO:0005886	plasma membrane	cellular_component	4	0.0011937	ENSRNOG00000019361	Inpp5j	inositol polyphosphate-5-phosphatase J [Source:RGD Symbol;Acc:620541]	0.506732	0.656187	0.933052	1.64089	1.20865	1.66385	0.46439	-1.10659	down
GO:0005886	plasma membrane	cellular_component	4	0.0011937	ENSRNOG00000020054	LOC108348201	protocadherin beta-7-like [Source:RGD Symbol;Acc:11368541]	0.582061	0.474989	0.669141	1.45791	0.928726	1.18222	0.483683	-1.04787	down
GO:0005886	plasma membrane	cellular_component	4	0.0011937	ENSRNOG00000020904	Cdc42ep2	CDC42 effector protein 2 [Source:RGD Symbol;Acc:1310253]	16.1048	13.5876	19.8116	27.6602	36.9112	34.8229	0.498057	-1.00562	down
GO:0005886	plasma membrane	cellular_component	4	0.0011937	ENSRNOG00000020970	Rundc3a	RUN domain containing 3A [Source:RGD Symbol;Acc:735057]	0.651496	0.425892	0.634793	1.32586	1.36872	1.8634	0.375645	-1.41256	down
GO:0005886	plasma membrane	cellular_component	4	0.0011937	ENSRNOG00000021256	Adra1d	adrenoceptor alpha 1D [Source:RGD Symbol;Acc:62064]	0.263536	0.619624	0.355989	1.74131	1.36148	1.17567	0.289625	-1.78774	down
GO:0005886	plasma membrane	cellular_component	4	0.0011937	ENSRNOG00000022239	Trarg1	trafficking regulator of GLUT4 (SLC2A4) 1 [Source:RGD Symbol;Acc:1307639]	2.12065	2.24179	2.81453	5.40766	4.54121	9.15362	0.375708	-1.41232	down
GO:0005886	plasma membrane	cellular_component	4	0.0011937	ENSRNOG00000026061	Sirpb3	signal-regulatory protein beta 3 [Source:RGD Symbol;Acc:1566226]	2.12654	0.819535	1.51799	4.73302	2.62538	3.40954	0.41457	-1.27031	down
GO:0005886	plasma membrane	cellular_component	4	0.0011937	ENSRNOG00000026577	Cpne4	copine 4 [Source:RGD Symbol;Acc:1308844]	0	0.031358	0	0.111452	0.096857	0.268529	0.0657624	-3.92659	down
GO:0005886	plasma membrane	cellular_component	4	0.0011937	ENSRNOG00000027767	Slc38a5	solute carrier family 38, member 5 [Source:RGD Symbol;Acc:620702]	3.29864	4.26098	4.74245	7.87061	7.30095	9.9667	0.489376	-1.03098	down
GO:0005886	plasma membrane	cellular_component	4	0.0011937	ENSRNOG00000029342	Scn7a	sodium voltage-gated channel alpha subunit 7 [Source:RGD Symbol;Acc:61922]	11.5574	9.24312	13.5523	34.1139	29.6192	24.4067	0.389754	-1.35936	down
GO:0005886	plasma membrane	cellular_component	4	0.0011937	ENSRNOG00000032417	Gabrp	gamma-aminobutyric acid type A receptor pi subunit [Source:RGD Symbol;Acc:620532]	0.092348	0.19525	0.36241	0.951681	0.704935	1.06596	0.238747	-2.06644	down
GO:0005886	plasma membrane	cellular_component	4	0.0011937	ENSRNOG00000032828	Mapk8ip2	mitogen-activated protein kinase 8 interacting protein 2 [Source:RGD Symbol;Acc:1309727]	0	0.011052	0	0.164696	0.033483	0.104562	0.0365065	-4.7757	down
GO:0005886	plasma membrane	cellular_component	4	0.0011937	ENSRNOG00000033348	Duox1	dual oxidase 1 [Source:RGD Symbol;Acc:628760]	4.03322	2.15876	3.55853	1.38054	1.11797	1.15612	2.668	1.41576	up
GO:0005886	plasma membrane	cellular_component	4	0.0011937	ENSRNOG00000036984	Slco1a1	solute carrier organic anion transporter family, member 1a1 [Source:RGD Symbol;Acc:3700]	0.270199	0.433603	0.341127	0.058162	0.110115	0.019966	5.55096	2.47274	up
GO:0005886	plasma membrane	cellular_component	4	0.0011937	ENSRNOG00000038066	Fam155b	family with sequence similarity 155, member B [Source:RGD Symbol;Acc:1584125]	1.24283	1.12356	1.14399	0.650261	0.318461	0.399032	2.56653	1.35982	up
GO:0005886	plasma membrane	cellular_component	4	0.0011937	ENSRNOG00000047046	Plin4	perilipin 4 [Source:RGD Symbol;Acc:1590867]	0.37018	0.405914	0.437357	0.759875	0.753192	1.7713	0.369463	-1.4365	down
GO:0005886	plasma membrane	cellular_component	4	0.0011937	ENSRNOG00000048145	Sstr1	somatostatin receptor 1 [Source:RGD Symbol;Acc:3762]	1.29021	1.61171	1.86831	0.504885	0.640927	0.601976	2.72929	1.44853	up
GO:0005886	plasma membrane	cellular_component	4	0.0011937	ENSRNOG00000048239	Cxcr1	C-X-C motif chemokine receptor 1 [Source:RGD Symbol;Acc:2905]	16.0266	13.947	11.851	5.02716	3.39089	4.10572	3.33962	1.73968	up
GO:0005886	plasma membrane	cellular_component	4	0.0011937	ENSRNOG00000049590	RT1-M2	RT1 class Ib, locus M2 [Source:RGD Symbol;Acc:3493]	1.05738	0.72803	0.844597	0.257868	0	0.133657	6.71734	2.74789	up
GO:0005886	plasma membrane	cellular_component	4	0.0011937	ENSRNOG00000053804	Prmt8	protein arginine methyltransferase 8 [Source:RGD Symbol;Acc:1587677]	0.332504	0.569915	0.192181	0.028857	0	0.008121	29.6014	4.88759	up
GO:0005886	plasma membrane	cellular_component	4	0.0011937	ENSRNOG00000055103	Cftr	cystic fibrosis transmembrane conductance regulator [Source:RGD Symbol;Acc:2332]	1.14851	0.941143	0.718715	2.41175	2.46834	1.29678	0.454659	-1.13714	down
GO:0005886	plasma membrane	cellular_component	4	0.0011937	ENSRNOG00000056697	Kcnab1	potassium voltage-gated channel subfamily A member regulatory beta subunit 1 [Source:RGD Symbol;Acc:61827]	3.31095	2.45264	1.755	1.07741	1.03743	1.28351	2.21242	1.14563	up
GO:0005886	plasma membrane	cellular_component	4	0.0011937	ENSRNOG00000057221	Scn3b	sodium voltage-gated channel beta subunit 3 [Source:RGD Symbol;Acc:621657]	21.0976	17.1091	25.2416	51.1686	32.1861	48.604	0.480819	-1.05643	down
GO:0005886	plasma membrane	cellular_component	4	0.0011937	ENSRNOG00000057643	Klri2	killer cell lectin-like receptor family I member 2 [Source:RGD Symbol;Acc:1359205]	4.15407	4.85632	2.9182	1.3324	0.727116	2.385	2.68389	1.42433	up
GO:0005886	plasma membrane	cellular_component	4	0.0011937	ENSRNOG00000058692	Slc26a4	solute carrier family 26 member 4 [Source:RGD Symbol;Acc:3293]	2.67212	1.9953	1.15691	1.03707	0.715431	0.934049	2.16796	1.11634	up
GO:0005886	plasma membrane	cellular_component	4	0.0011937	ENSRNOG00000060246	Klrd1	killer cell lectin like receptor D1 [Source:RGD Symbol;Acc:2978]	13.655	21.5233	11.2525	7.56228	4.74204	9.73844	2.1064	1.07478	up
GO:1903426	regulation of reactive oxygen species biosynthetic process	biological_process	7	0.00139925	ENSRNOG00000003580	Ucp1	uncoupling protein 1 [Source:RGD Symbol;Acc:3931]	0	0	0	0	0	12.6582	2.37001e-05	-15.3647	down
GO:1903426	regulation of reactive oxygen species biosynthetic process	biological_process	7	0.00139925	ENSRNOG00000016949	Slc25a33	solute carrier family 25 member 33 [Source:RGD Symbol;Acc:1583942]	12.7926	13.8239	16.3486	29.8604	28.5655	33.4012	0.467891	-1.09576	down
GO:0060029	convergent extension involved in organogenesis	biological_process	8	0.00139925	ENSRNOG00000007765	Frzb	frizzled-related protein [Source:RGD Symbol;Acc:1311315]	0.835247	1.32762	1.13202	2.30154	1.72858	2.68979	0.490317	-1.02821	down
GO:0060029	convergent extension involved in organogenesis	biological_process	8	0.00139925	ENSRNOG00000015618	Wnt5a	Wnt family member 5A [Source:RGD Symbol;Acc:69250]	3.0348	2.5955	2.2052	6.68335	4.54321	6.14645	0.451016	-1.14875	down
GO:0005579	membrane attack complex	cellular_component	6	0.00139925	ENSRNOG00000013736	C9	complement C9 [Source:RGD Symbol;Acc:620319]	0.095381	0.17503	0.090134	1.08752	0.317408	0.991207	0.150469	-2.73246	down
GO:0005579	membrane attack complex	cellular_component	6	0.00139925	ENSRNOG00000018899	C5	complement C5 [Source:RGD Symbol;Acc:2237]	1.41673	11.2071	0.792005	0.351361	0.325713	0.313456	13.5441	3.7596	up
GO:0001649	osteoblast differentiation	biological_process	6	0.0014309	ENSRNOG00000000700	Tmem119	transmembrane protein 119 [Source:RGD Symbol;Acc:1307573]	6.59079	6.90106	6.28528	11.3215	14.3882	15.1594	0.483913	-1.04718	down
GO:0001649	osteoblast differentiation	biological_process	6	0.0014309	ENSRNOG00000003897	Col1a1	collagen type I alpha 1 chain [Source:RGD Symbol;Acc:61817]	21.9343	20.0594	21.0288	58.1167	63.4283	51.677	0.363825	-1.45869	down
GO:0001649	osteoblast differentiation	biological_process	6	0.0014309	ENSRNOG00000008816	Gpnmb	glycoprotein nmb [Source:RGD Symbol;Acc:71008]	194.008	146.217	143.748	84.0387	88.9556	65.1415	2.03234	1.02314	up
GO:0001649	osteoblast differentiation	biological_process	6	0.0014309	ENSRNOG00000008943	Penk	proenkephalin [Source:RGD Symbol;Acc:68946]	1.132	1.55783	3.43566	0.621514	0.959967	0.863637	2.50519	1.32492	up
GO:0001649	osteoblast differentiation	biological_process	6	0.0014309	ENSRNOG00000025120	Gli1	GLI family zinc finger 1 [Source:RGD Symbol;Acc:621673]	0.698325	0.477126	0.544131	1.56395	1.68971	1.52278	0.360013	-1.47388	down
GO:0007160	cell-matrix adhesion	biological_process	6	0.0014309	ENSRNOG00000000341	Nid2	nidogen 2 [Source:RGD Symbol;Acc:1311685]	2.31282	2.30347	2.63372	6.44043	3.59282	6.79857	0.430732	-1.21514	down
GO:0007160	cell-matrix adhesion	biological_process	6	0.0014309	ENSRNOG00000002461	Nid1	nidogen 1 [Source:RGD Symbol;Acc:3178]	7.0868	7.3753	8.23495	25.6053	16.1071	15.6315	0.395806	-1.33713	down
GO:0007160	cell-matrix adhesion	biological_process	6	0.0014309	ENSRNOG00000003357	Col3a1	collagen type III alpha 1 chain [Source:RGD Symbol;Acc:71029]	156.474	148.568	159.465	332.712	580.742	362.723	0.363983	-1.45806	down
GO:0007160	cell-matrix adhesion	biological_process	6	0.0014309	ENSRNOG00000006723	Itga11	integrin subunit alpha 11 [Source:RGD Symbol;Acc:1311711]	0.445333	0.566447	0.898136	1.71316	1.51553	1.32386	0.419528	-1.25316	down
GO:0007160	cell-matrix adhesion	biological_process	6	0.0014309	ENSRNOG00000018865	Adamts12	ADAM metallopeptidase with thrombospondin type 1 motif, 12 [Source:RGD Symbol;Acc:1307323]	1.22778	1.39158	1.85944	4.25796	2.71078	3.8658	0.413382	-1.27445	down
GO:0009897	external side of plasma membrane	cellular_component	5	0.00190857	ENSRNOG00000002046	Cd200r1l	CD200 receptor 1-like [Source:RGD Symbol;Acc:1563387]	5.77038	3.90674	4.22352	2.19257	2.47716	1.07152	2.42119	1.27572	up
GO:0009897	external side of plasma membrane	cellular_component	5	0.00190857	ENSRNOG00000010617	Scube1	signal peptide, CUB domain and EGF like domain containing 1 [Source:RGD Symbol;Acc:1309015]	1.45564	1.53436	2.27365	3.64137	2.98263	4.25135	0.483999	-1.04692	down
GO:0009897	external side of plasma membrane	cellular_component	5	0.00190857	ENSRNOG00000017226	Slc2a4	solute carrier family 2 member 4 [Source:RGD Symbol;Acc:2711]	0.725115	0.747971	0.866538	1.38289	1.35574	3.8632	0.35439	-1.49659	down
GO:0009897	external side of plasma membrane	cellular_component	5	0.00190857	ENSRNOG00000018978	Scart1	scavenger receptor family member expressed on T-cells 1 [Source:RGD Symbol;Acc:1307378]	2.38235	3.22753	0.914079	0.607067	0.571033	0.709445	3.45632	1.78924	up
GO:0009897	external side of plasma membrane	cellular_component	5	0.00190857	ENSRNOG00000022242	Cxcl9	C-X-C motif chemokine ligand 9 [Source:RGD Symbol;Acc:628798]	6.90616	5.99513	4.70513	2.639	3.00671	2.71353	2.10622	1.07466	up
GO:0009897	external side of plasma membrane	cellular_component	5	0.00190857	ENSRNOG00000030332	Ighg1	immunoglobulin heavy constant gamma 1 [Source:RGD Symbol;Acc:1359539]	5.53172	6.5237	33.722	1.9498	0.877678	2.30912	8.91201	3.15575	up
GO:0009897	external side of plasma membrane	cellular_component	5	0.00190857	ENSRNOG00000042319	AABR07065814		6.68222	8.72294	9.77249	5.32954	2.55509	3.63014	2.18655	1.12866	up
GO:0009897	external side of plasma membrane	cellular_component	5	0.00190857	ENSRNOG00000042569	AABR07065811		9.52239	7.43076	3.45214	1.05548	0.953026	2.96165	4.10556	2.03758	up
GO:0009897	external side of plasma membrane	cellular_component	5	0.00190857	ENSRNOG00000048159	AABR07065778		6.58067	1.09822	4.45755	0.512362	0.399594	1.25736	5.5946	2.48403	up
GO:0009897	external side of plasma membrane	cellular_component	5	0.00190857	ENSRNOG00000048239	Cxcr1	C-X-C motif chemokine receptor 1 [Source:RGD Symbol;Acc:2905]	16.0266	13.947	11.851	5.02716	3.39089	4.10572	3.33962	1.73968	up
GO:0009897	external side of plasma membrane	cellular_component	5	0.00190857	ENSRNOG00000049590	RT1-M2	RT1 class Ib, locus M2 [Source:RGD Symbol;Acc:3493]	1.05738	0.72803	0.844597	0.257868	0	0.133657	6.71734	2.74789	up
GO:0086010	membrane depolarization during action potential	biological_process	7	0.00208228	ENSRNOG00000029342	Scn7a	sodium voltage-gated channel alpha subunit 7 [Source:RGD Symbol;Acc:61922]	11.5574	9.24312	13.5523	34.1139	29.6192	24.4067	0.389754	-1.35936	down
GO:0086010	membrane depolarization during action potential	biological_process	7	0.00208228	ENSRNOG00000057221	Scn3b	sodium voltage-gated channel beta subunit 3 [Source:RGD Symbol;Acc:621657]	21.0976	17.1091	25.2416	51.1686	32.1861	48.604	0.480819	-1.05643	down
GO:0001957	intramembranous ossification	biological_process	6	0.00208228	ENSRNOG00000003897	Col1a1	collagen type I alpha 1 chain [Source:RGD Symbol;Acc:61817]	21.9343	20.0594	21.0288	58.1167	63.4283	51.677	0.363825	-1.45869	down
GO:0001957	intramembranous ossification	biological_process	6	0.00208228	ENSRNOG00000016695	Mmp2	matrix metallopeptidase 2 [Source:RGD Symbol;Acc:621316]	30.7938	26.2646	32.2348	67.5082	55.093	74.8328	0.452269	-1.14475	down
GO:0046890	regulation of lipid biosynthetic process	biological_process	7	0.00208228	ENSRNOG00000012404	Thrsp	thyroid hormone responsive [Source:RGD Symbol;Acc:3859]	0.577546	0.320142	0.530996	1.2563	0.946753	66.5639	0.0207757	-5.58896	down
GO:0046890	regulation of lipid biosynthetic process	biological_process	7	0.00208228	ENSRNOG00000045797	Lep	leptin [Source:RGD Symbol;Acc:3000]	0.038354	0.031345	0.037116	0.113483	0.270256	1.22499	0.0663972	-3.91273	down
GO:1900121	negative regulation of receptor binding	biological_process	8	0.00208228	ENSRNOG00000001821	Adipoq	adiponectin, C1Q and collagen domain containing [Source:RGD Symbol;Acc:628748]	0.269142	0.528074	0.422021	2.31808	1.93395	13.321	0.0693811	-3.84931	down
GO:1900121	negative regulation of receptor binding	biological_process	8	0.00208228	ENSRNOG00000015220	Crtac1	cartilage acidic protein 1 [Source:RGD Symbol;Acc:621085]	0.450903	0.218255	0.403717	0.111445	0.0423887	0.0200992	6.16833	2.62488	up
GO:0032635	interleukin-6 production	biological_process	5	0.00208228	ENSRNOG00000004649	Il1b	interleukin 1 beta [Source:RGD Symbol;Acc:2891]	20.4545	17.8629	26.638	9.01274	9.02768	13.4852	2.0604	1.04293	up
GO:0032635	interleukin-6 production	biological_process	5	0.00208228	ENSRNOG00000045797	Lep	leptin [Source:RGD Symbol;Acc:3000]	0.038354	0.031345	0.037116	0.113483	0.270256	1.22499	0.0663972	-3.91273	down
GO:0051379	epinephrine binding	molecular_function	6	0.00208228	ENSRNOG00000012674	Adrb3	adrenoceptor beta 3 [Source:RGD Symbol;Acc:2061]	0	0	0	0.089852	0.041841	1.01731	0.000261096	-11.9031	down
GO:0051379	epinephrine binding	molecular_function	6	0.00208228	ENSRNOG00000013887	Adra2b	adrenoceptor alpha 2B [Source:RGD Symbol;Acc:2057]	0.311704	0.246273	0.182689	0.886988	0.676955	1.17461	0.270458	-1.88652	down
GO:0005125	cytokine activity	molecular_function	7	0.00208394	ENSRNOG00000002792	Cxcl2	C-X-C motif chemokine ligand 2 [Source:RGD Symbol;Acc:70069]	2.49155	1.56141	2.22508	0.21844	0.639161	0.597588	4.31425	2.10911	up
GO:0005125	cytokine activity	molecular_function	7	0.00208394	ENSRNOG00000004649	Il1b	interleukin 1 beta [Source:RGD Symbol;Acc:2891]	20.4545	17.8629	26.638	9.01274	9.02768	13.4852	2.0604	1.04293	up
GO:0005125	cytokine activity	molecular_function	7	0.00208394	ENSRNOG00000015618	Wnt5a	Wnt family member 5A [Source:RGD Symbol;Acc:69250]	3.0348	2.5955	2.2052	6.68335	4.54321	6.14645	0.451016	-1.14875	down
GO:0005125	cytokine activity	molecular_function	7	0.00208394	ENSRNOG00000022242	Cxcl9	C-X-C motif chemokine ligand 9 [Source:RGD Symbol;Acc:628798]	6.90616	5.99513	4.70513	2.639	3.00671	2.71353	2.10622	1.07466	up
GO:0005125	cytokine activity	molecular_function	7	0.00208394	ENSRNOG00000033209	Bmp8b	bone morphogenetic protein 8b [Source:RGD Symbol;Acc:1591873]	1.03207	1.66145	1.31074	0.262554	0.64986	0.54328	2.75076	1.45983	up
GO:0005125	cytokine activity	molecular_function	7	0.00208394	ENSRNOG00000043342	LOC290595	hypothetical gene supported by AF152002 [Source:RGD Symbol;Acc:1566160]	0.873931	12.6402	1.47192	0	0.505809	0.50069	14.8893	3.89621	up
GO:0005125	cytokine activity	molecular_function	7	0.00208394	ENSRNOG00000045797	Lep	leptin [Source:RGD Symbol;Acc:3000]	0.038354	0.031345	0.037116	0.113483	0.270256	1.22499	0.0663972	-3.91273	down
GO:0007155	cell adhesion	biological_process	4	0.00215049	ENSRNOG00000003732	Flrt2	fibronectin leucine rich transmembrane protein 2 [Source:RGD Symbol;Acc:1308574]	1.80281	2.04289	1.39731	3.1207	4.03324	3.75719	0.480519	-1.05733	down
GO:0007155	cell adhesion	biological_process	4	0.00215049	ENSRNOG00000006723	Itga11	integrin subunit alpha 11 [Source:RGD Symbol;Acc:1311711]	0.445333	0.566447	0.898136	1.71316	1.51553	1.32386	0.419528	-1.25316	down
GO:0007155	cell adhesion	biological_process	4	0.00215049	ENSRNOG00000007865	Ephb1	Eph receptor B1 [Source:RGD Symbol;Acc:2556]	0.836464	0.793073	1.14742	0.471882	0.398737	0.218471	2.5498	1.35038	up
GO:0007155	cell adhesion	biological_process	4	0.00215049	ENSRNOG00000008816	Gpnmb	glycoprotein nmb [Source:RGD Symbol;Acc:71008]	194.008	146.217	143.748	84.0387	88.9556	65.1415	2.03234	1.02314	up
GO:0007155	cell adhesion	biological_process	4	0.00215049	ENSRNOG00000010263	Cldn11	claudin 11 [Source:RGD Symbol;Acc:71081]	2.68847	2.864	2.8561	5.43847	8.61906	7.68507	0.386732	-1.37059	down
GO:0007155	cell adhesion	biological_process	4	0.00215049	ENSRNOG00000011134	Lama2	laminin subunit alpha 2 [Source:RGD Symbol;Acc:1308889]	2.28319	2.43893	3.8991	6.65355	4.97214	6.4225	0.477678	-1.06589	down
GO:0007155	cell adhesion	biological_process	4	0.00215049	ENSRNOG00000012367	Pcdh7	protocadherin 7 [Source:RGD Symbol;Acc:1303209]	0.812085	0.617343	0.767092	1.37347	2.74181	1.534	0.388814	-1.36285	down
GO:0007155	cell adhesion	biological_process	4	0.00215049	ENSRNOG00000013306	Pcdh20	protocadherin 20 [Source:RGD Symbol;Acc:1306297]	0.199983	0.074123	0.181417	0.636184	0.284763	0.574304	0.304647	-1.71479	down
GO:0007155	cell adhesion	biological_process	4	0.00215049	ENSRNOG00000020054	LOC108348201	protocadherin beta-7-like [Source:RGD Symbol;Acc:11368541]	0.582061	0.474989	0.669141	1.45791	0.928726	1.18222	0.483683	-1.04787	down
GO:0007155	cell adhesion	biological_process	4	0.00215049	ENSRNOG00000039197	LOC108348074	collagen alpha-1(XV) chain-like [Source:RGD Symbol;Acc:11464459]	2.9943	2.28433	4.771	10.5648	7.14882	12.7016	0.330415	-1.59765	down
GO:0007155	cell adhesion	biological_process	4	0.00215049	ENSRNOG00000060381	Col15a1	collagen type XV alpha 1 chain [Source:RGD Symbol;Acc:1310820]	2.72355	3.70059	6.38776	17.7121	9.88001	14.3242	0.305655	-1.71003	down
GO:0030659	cytoplasmic vesicle membrane	cellular_component	6	0.00232871	ENSRNOG00000000708	Sgsm1	small G protein signaling modulator 1 [Source:RGD Symbol;Acc:1308178]	0.247765	0.474753	0.683811	0.178839	0.124237	0.152294	3.08832	1.62682	up
GO:0030659	cytoplasmic vesicle membrane	cellular_component	6	0.00232871	ENSRNOG00000009686	Aqp7	aquaporin 7 [Source:RGD Symbol;Acc:2145]	0.04156	0.071983	0.079689	0.169014	0.259968	3.27253	0.0522035	-4.25971	down
GO:0030659	cytoplasmic vesicle membrane	cellular_component	6	0.00232871	ENSRNOG00000015774	Mreg	melanoregulin [Source:RGD Symbol;Acc:1562333]	0.826137	1.91827	1.79114	0.453484	0.431069	0.6671	2.92304	1.54747	up
GO:0030659	cytoplasmic vesicle membrane	cellular_component	6	0.00232871	ENSRNOG00000017226	Slc2a4	solute carrier family 2 member 4 [Source:RGD Symbol;Acc:2711]	0.725115	0.747971	0.866538	1.38289	1.35574	3.8632	0.35439	-1.49659	down
GO:0030659	cytoplasmic vesicle membrane	cellular_component	6	0.00232871	ENSRNOG00000022239	Trarg1	trafficking regulator of GLUT4 (SLC2A4) 1 [Source:RGD Symbol;Acc:1307639]	2.12065	2.24179	2.81453	5.40766	4.54121	9.15362	0.375708	-1.41232	down
GO:0045766	positive regulation of angiogenesis	biological_process	8	0.00276415	ENSRNOG00000004649	Il1b	interleukin 1 beta [Source:RGD Symbol;Acc:2891]	20.4545	17.8629	26.638	9.01274	9.02768	13.4852	2.0604	1.04293	up
GO:0045766	positive regulation of angiogenesis	biological_process	8	0.00276415	ENSRNOG00000004725	Cela1	chymotrypsin like elastase 1 [Source:RGD Symbol;Acc:2547]	25.6612	19.6849	15.4892	7.22067	12.5953	7.85221	2.19875	1.13668	up
GO:0045766	positive regulation of angiogenesis	biological_process	8	0.00276415	ENSRNOG00000005650	Pgf	placental growth factor [Source:RGD Symbol;Acc:619850]	1.81335	1.74628	1.74662	2.71735	7.21811	5.43133	0.345306	-1.53405	down
GO:0045766	positive regulation of angiogenesis	biological_process	8	0.00276415	ENSRNOG00000015618	Wnt5a	Wnt family member 5A [Source:RGD Symbol;Acc:69250]	3.0348	2.5955	2.2052	6.68335	4.54321	6.14645	0.451016	-1.14875	down
GO:0045766	positive regulation of angiogenesis	biological_process	8	0.00276415	ENSRNOG00000016696	Angpt2	angiopoietin 2 [Source:RGD Symbol;Acc:621861]	3.01199	2.77709	3.05503	7.45684	6.76239	7.96137	0.398732	-1.32651	down
GO:0045766	positive regulation of angiogenesis	biological_process	8	0.00276415	ENSRNOG00000018899	C5	complement C5 [Source:RGD Symbol;Acc:2237]	1.41673	11.2071	0.792005	0.351361	0.325713	0.313456	13.5441	3.7596	up
GO:0071398	cellular response to fatty acid	biological_process	7	0.00286257	ENSRNOG00000003580	Ucp1	uncoupling protein 1 [Source:RGD Symbol;Acc:3931]	0	0	0	0	0	12.6582	2.37001e-05	-15.3647	down
GO:0071398	cellular response to fatty acid	biological_process	7	0.00286257	ENSRNOG00000009565	Pdk4	pyruvate dehydrogenase kinase 4 [Source:RGD Symbol;Acc:69061]	4.36221	3.78789	4.40906	9.63669	7.51304	17.2593	0.364996	-1.45405	down
GO:0071398	cellular response to fatty acid	biological_process	7	0.00286257	ENSRNOG00000046239	LOC100909612	mitochondrial brown fat uncoupling protein 1-like [Source:RGD Symbol;Acc:6502621]	0	0	0	0	0	5.27305	5.68931e-05	-14.1014	down
GO:0061037	negative regulation of cartilage development	biological_process	7	0.00289218	ENSRNOG00000007765	Frzb	frizzled-related protein [Source:RGD Symbol;Acc:1311315]	0.835247	1.32762	1.13202	2.30154	1.72858	2.68979	0.490317	-1.02821	down
GO:0061037	negative regulation of cartilage development	biological_process	7	0.00289218	ENSRNOG00000045797	Lep	leptin [Source:RGD Symbol;Acc:3000]	0.038354	0.031345	0.037116	0.113483	0.270256	1.22499	0.0663972	-3.91273	down
GO:0045666	positive regulation of neuron differentiation	biological_process	10	0.0029057	ENSRNOG00000002364	Rnf112	ring finger protein 112 [Source:RGD Symbol;Acc:3986]	0.268859	0.283787	0.444264	0.501704	1.23498	0.948211	0.371303	-1.42933	down
GO:0045666	positive regulation of neuron differentiation	biological_process	10	0.0029057	ENSRNOG00000005592	Brinp2	BMP/retinoic acid inducible neural specific 2 [Source:RGD Symbol;Acc:708419]	0.049991	0.076611	0.187873	0.432909	0.502739	0.740238	0.187647	-2.41391	down
GO:0045666	positive regulation of neuron differentiation	biological_process	10	0.0029057	ENSRNOG00000013887	Adra2b	adrenoceptor alpha 2B [Source:RGD Symbol;Acc:2057]	0.311704	0.246273	0.182689	0.886988	0.676955	1.17461	0.270458	-1.88652	down
GO:0045666	positive regulation of neuron differentiation	biological_process	10	0.0029057	ENSRNOG00000015318	Heyl	hes-related family bHLH transcription factor with YRPW motif-like [Source:RGD Symbol;Acc:1305022]	2.94339	2.74707	3.0413	7.51638	10.985	9.78336	0.308709	-1.69568	down
GO:0045666	positive regulation of neuron differentiation	biological_process	10	0.0029057	ENSRNOG00000018005	Duoxa1	dual oxidase maturation factor 1 [Source:RGD Symbol;Acc:1306601]	5.56049	2.15936	4.37417	1.58063	1.28771	1.77397	2.60517	1.38138	up
GO:0001934	positive regulation of protein phosphorylation	biological_process	10	0.00311473	ENSRNOG00000000700	Tmem119	transmembrane protein 119 [Source:RGD Symbol;Acc:1307573]	6.59079	6.90106	6.28528	11.3215	14.3882	15.1594	0.483913	-1.04718	down
GO:0001934	positive regulation of protein phosphorylation	biological_process	10	0.00311473	ENSRNOG00000001821	Adipoq	adiponectin, C1Q and collagen domain containing [Source:RGD Symbol;Acc:628748]	0.269142	0.528074	0.422021	2.31808	1.93395	13.321	0.0693811	-3.84931	down
GO:0001934	positive regulation of protein phosphorylation	biological_process	10	0.00311473	ENSRNOG00000004649	Il1b	interleukin 1 beta [Source:RGD Symbol;Acc:2891]	20.4545	17.8629	26.638	9.01274	9.02768	13.4852	2.0604	1.04293	up
GO:0001934	positive regulation of protein phosphorylation	biological_process	10	0.00311473	ENSRNOG00000005650	Pgf	placental growth factor [Source:RGD Symbol;Acc:619850]	1.81335	1.74628	1.74662	2.71735	7.21811	5.43133	0.345306	-1.53405	down
GO:0001934	positive regulation of protein phosphorylation	biological_process	10	0.00311473	ENSRNOG00000008816	Gpnmb	glycoprotein nmb [Source:RGD Symbol;Acc:71008]	194.008	146.217	143.748	84.0387	88.9556	65.1415	2.03234	1.02314	up
GO:0001934	positive regulation of protein phosphorylation	biological_process	10	0.00311473	ENSRNOG00000015618	Wnt5a	Wnt family member 5A [Source:RGD Symbol;Acc:69250]	3.0348	2.5955	2.2052	6.68335	4.54321	6.14645	0.451016	-1.14875	down
GO:0001934	positive regulation of protein phosphorylation	biological_process	10	0.00311473	ENSRNOG00000047367	Card14	caspase recruitment domain family, member 14 [Source:RGD Symbol;Acc:1591135]	5.46672	4.5317	4.79579	2.63631	2.92656	1.73583	2.02697	1.01932	up
GO:0061844	antimicrobial humoral immune response mediated by antimicrobial peptide	biological_process	7	0.00322439	ENSRNOG00000002792	Cxcl2	C-X-C motif chemokine ligand 2 [Source:RGD Symbol;Acc:70069]	2.49155	1.56141	2.22508	0.21844	0.639161	0.597588	4.31425	2.10911	up
GO:0061844	antimicrobial humoral immune response mediated by antimicrobial peptide	biological_process	7	0.00322439	ENSRNOG00000022242	Cxcl9	C-X-C motif chemokine ligand 9 [Source:RGD Symbol;Acc:628798]	6.90616	5.99513	4.70513	2.639	3.00671	2.71353	2.10622	1.07466	up
GO:0061844	antimicrobial humoral immune response mediated by antimicrobial peptide	biological_process	7	0.00322439	ENSRNOG00000024899	Cxcl13	C-X-C motif chemokine ligand 13 [Source:RGD Symbol;Acc:1564256]	0.505115	0.912997	2.0192	4.23093	3.68046	3.58254	0.299054	-1.74152	down
GO:0071230	cellular response to amino acid stimulus	biological_process	7	0.00347845	ENSRNOG00000001249	Col6a1	collagen type VI alpha 1 chain [Source:RGD Symbol;Acc:1565398]	46.125	44.8447	58.8249	100.324	89.8661	110.945	0.497433	-1.00743	down
GO:0071230	cellular response to amino acid stimulus	biological_process	7	0.00347845	ENSRNOG00000003357	Col3a1	collagen type III alpha 1 chain [Source:RGD Symbol;Acc:71029]	156.474	148.568	159.465	332.712	580.742	362.723	0.363983	-1.45806	down
GO:0071230	cellular response to amino acid stimulus	biological_process	7	0.00347845	ENSRNOG00000003897	Col1a1	collagen type I alpha 1 chain [Source:RGD Symbol;Acc:61817]	21.9343	20.0594	21.0288	58.1167	63.4283	51.677	0.363825	-1.45869	down
GO:0071230	cellular response to amino acid stimulus	biological_process	7	0.00347845	ENSRNOG00000016695	Mmp2	matrix metallopeptidase 2 [Source:RGD Symbol;Acc:621316]	30.7938	26.2646	32.2348	67.5082	55.093	74.8328	0.452269	-1.14475	down
GO:0001662	behavioral fear response	biological_process	7	0.00361301	ENSRNOG00000008943	Penk	proenkephalin [Source:RGD Symbol;Acc:68946]	1.132	1.55783	3.43566	0.621514	0.959967	0.863637	2.50519	1.32492	up
GO:0001662	behavioral fear response	biological_process	7	0.00361301	ENSRNOG00000019985	Asic4	acid sensing ion channel subunit family member 4 [Source:RGD Symbol;Acc:621068]	1.22068	0.713135	0.167016	0.140032	0.161282	0.09395	5.31501	2.41007	up
GO:0001662	behavioral fear response	biological_process	7	0.00361301	ENSRNOG00000032828	Mapk8ip2	mitogen-activated protein kinase 8 interacting protein 2 [Source:RGD Symbol;Acc:1309727]	0	0.011052	0	0.164696	0.033483	0.104562	0.0365065	-4.7757	down
GO:0006935	chemotaxis	biological_process	5	0.00376413	ENSRNOG00000002792	Cxcl2	C-X-C motif chemokine ligand 2 [Source:RGD Symbol;Acc:70069]	2.49155	1.56141	2.22508	0.21844	0.639161	0.597588	4.31425	2.10911	up
GO:0006935	chemotaxis	biological_process	5	0.00376413	ENSRNOG00000022242	Cxcl9	C-X-C motif chemokine ligand 9 [Source:RGD Symbol;Acc:628798]	6.90616	5.99513	4.70513	2.639	3.00671	2.71353	2.10622	1.07466	up
GO:0006935	chemotaxis	biological_process	5	0.00376413	ENSRNOG00000024899	Cxcl13	C-X-C motif chemokine ligand 13 [Source:RGD Symbol;Acc:1564256]	0.505115	0.912997	2.0192	4.23093	3.68046	3.58254	0.299054	-1.74152	down
GO:0006935	chemotaxis	biological_process	5	0.00376413	ENSRNOG00000043342	LOC290595	hypothetical gene supported by AF152002 [Source:RGD Symbol;Acc:1566160]	0.873931	12.6402	1.47192	0	0.505809	0.50069	14.8893	3.89621	up
GO:0006935	chemotaxis	biological_process	5	0.00376413	ENSRNOG00000048239	Cxcr1	C-X-C motif chemokine receptor 1 [Source:RGD Symbol;Acc:2905]	16.0266	13.947	11.851	5.02716	3.39089	4.10572	3.33962	1.73968	up
GO:0009635	response to herbicide	biological_process	5	0.00382582	ENSRNOG00000013304	Arg1	arginase 1 [Source:RGD Symbol;Acc:2150]	14.1945	11.7175	9.74681	5.09255	6.15658	5.0671	2.18549	1.12795	up
GO:0009635	response to herbicide	biological_process	5	0.00382582	ENSRNOG00000019500	Cyp1a1	cytochrome P450, family 1, subfamily a, polypeptide 1 [Source:RGD Symbol;Acc:2458]	1.30617	2.01733	6.01601	22.1476	22.9681	33.3498	0.119027	-3.07064	down
GO:0050665	hydrogen peroxide biosynthetic process	biological_process	8	0.00382582	ENSRNOG00000019500	Cyp1a1	cytochrome P450, family 1, subfamily a, polypeptide 1 [Source:RGD Symbol;Acc:2458]	1.30617	2.01733	6.01601	22.1476	22.9681	33.3498	0.119027	-3.07064	down
GO:0050665	hydrogen peroxide biosynthetic process	biological_process	8	0.00382582	ENSRNOG00000033348	Duox1	dual oxidase 1 [Source:RGD Symbol;Acc:628760]	4.03322	2.15876	3.55853	1.38054	1.11797	1.15612	2.668	1.41576	up
GO:0060346	bone trabecula formation	biological_process	6	0.00382582	ENSRNOG00000003897	Col1a1	collagen type I alpha 1 chain [Source:RGD Symbol;Acc:61817]	21.9343	20.0594	21.0288	58.1167	63.4283	51.677	0.363825	-1.45869	down
GO:0060346	bone trabecula formation	biological_process	6	0.00382582	ENSRNOG00000016695	Mmp2	matrix metallopeptidase 2 [Source:RGD Symbol;Acc:621316]	30.7938	26.2646	32.2348	67.5082	55.093	74.8328	0.452269	-1.14475	down
GO:0060137	maternal process involved in parturition	biological_process	5	0.00382582	ENSRNOG00000014448	Arntl	aryl hydrocarbon receptor nuclear translocator-like [Source:RGD Symbol;Acc:62003]	12.2717	9.27036	6.63534	7.09622	2.94619	3.24836	2.12007	1.08411	up
GO:0060137	maternal process involved in parturition	biological_process	5	0.00382582	ENSRNOG00000019500	Cyp1a1	cytochrome P450, family 1, subfamily a, polypeptide 1 [Source:RGD Symbol;Acc:2458]	1.30617	2.01733	6.01601	22.1476	22.9681	33.3498	0.119027	-3.07064	down
GO:1990845	adaptive thermogenesis	biological_process	4	0.00382582	ENSRNOG00000003580	Ucp1	uncoupling protein 1 [Source:RGD Symbol;Acc:3931]	0	0	0	0	0	12.6582	2.37001e-05	-15.3647	down
GO:1990845	adaptive thermogenesis	biological_process	4	0.00382582	ENSRNOG00000046239	LOC100909612	mitochondrial brown fat uncoupling protein 1-like [Source:RGD Symbol;Acc:6502621]	0	0	0	0	0	5.27305	5.68931e-05	-14.1014	down
GO:0032964	collagen biosynthetic process	biological_process	5	0.00382582	ENSRNOG00000003897	Col1a1	collagen type I alpha 1 chain [Source:RGD Symbol;Acc:61817]	21.9343	20.0594	21.0288	58.1167	63.4283	51.677	0.363825	-1.45869	down
GO:0032964	collagen biosynthetic process	biological_process	5	0.00382582	ENSRNOG00000013304	Arg1	arginase 1 [Source:RGD Symbol;Acc:2150]	14.1945	11.7175	9.74681	5.09255	6.15658	5.0671	2.18549	1.12795	up
GO:2001223	negative regulation of neuron migration	biological_process	9	0.00382582	ENSRNOG00000003357	Col3a1	collagen type III alpha 1 chain [Source:RGD Symbol;Acc:71029]	156.474	148.568	159.465	332.712	580.742	362.723	0.363983	-1.45806	down
GO:2001223	negative regulation of neuron migration	biological_process	9	0.00382582	ENSRNOG00000014248	Erbb4	erb-b2 receptor tyrosine kinase 4 [Source:RGD Symbol;Acc:620486]	0.602772	0.820792	0.860173	0.247666	0.295959	0.240493	2.91249	1.54225	up
GO:0097435	supramolecular fiber organization	biological_process	5	0.00382582	ENSRNOG00000003357	Col3a1	collagen type III alpha 1 chain [Source:RGD Symbol;Acc:71029]	156.474	148.568	159.465	332.712	580.742	362.723	0.363983	-1.45806	down
GO:0097435	supramolecular fiber organization	biological_process	5	0.00382582	ENSRNOG00000012094	Ltbp2	latent transforming growth factor beta binding protein 2 [Source:RGD Symbol;Acc:68380]	13.8809	17.5958	18.0348	40.4369	33.2928	42.9138	0.424469	-1.23627	down
GO:0050840	extracellular matrix binding	molecular_function	4	0.00402903	ENSRNOG00000001469	Eln	elastin [Source:RGD Symbol;Acc:67394]	73.1078	65.5134	68.0227	159.291	311.13	177.739	0.318816	-1.6492	down
GO:0050840	extracellular matrix binding	molecular_function	4	0.00402903	ENSRNOG00000002461	Nid1	nidogen 1 [Source:RGD Symbol;Acc:3178]	7.0868	7.3753	8.23495	25.6053	16.1071	15.6315	0.395806	-1.33713	down
GO:0050840	extracellular matrix binding	molecular_function	4	0.00402903	ENSRNOG00000003018	Olfml2b	olfactomedin-like 2B [Source:RGD Symbol;Acc:1309257]	2.75388	1.92556	1.88733	5.19475	3.48674	5.50754	0.462806	-1.11152	down
GO:0007254	JNK cascade	biological_process	13	0.00402903	ENSRNOG00000015618	Wnt5a	Wnt family member 5A [Source:RGD Symbol;Acc:69250]	3.0348	2.5955	2.2052	6.68335	4.54321	6.14645	0.451016	-1.14875	down
GO:0007254	JNK cascade	biological_process	13	0.00402903	ENSRNOG00000032828	Mapk8ip2	mitogen-activated protein kinase 8 interacting protein 2 [Source:RGD Symbol;Acc:1309727]	0	0.011052	0	0.164696	0.033483	0.104562	0.0365065	-4.7757	down
GO:0007254	JNK cascade	biological_process	13	0.00402903	ENSRNOG00000053232	Ror2	receptor tyrosine kinase-like orphan receptor 2 [Source:RGD Symbol;Acc:1305275]	0.93753	0.843785	1.20048	2.20838	2.23265	2.21271	0.448138	-1.15799	down
GO:0004252	serine-type endopeptidase activity	molecular_function	8	0.00408106	ENSRNOG00000004725	Cela1	chymotrypsin like elastase 1 [Source:RGD Symbol;Acc:2547]	25.6612	19.6849	15.4892	7.22067	12.5953	7.85221	2.19875	1.13668	up
GO:0004252	serine-type endopeptidase activity	molecular_function	8	0.00408106	ENSRNOG00000010603	Gzma	granzyme A [Source:RGD Symbol;Acc:628640]	37.3725	72.5884	41.9582	18.3746	12.8989	25.6912	2.6669	1.41516	up
GO:0004252	serine-type endopeptidase activity	molecular_function	8	0.00408106	ENSRNOG00000019921	Rhbdl1	rhomboid like 1 [Source:RGD Symbol;Acc:620699]	1.56641	1.24922	0.921898	2.1812	3.31834	2.41805	0.472054	-1.08298	down
GO:0004252	serine-type endopeptidase activity	molecular_function	8	0.00408106	ENSRNOG00000025184	Prss35	serine protease 35 [Source:RGD Symbol;Acc:1311282]	0.174634	0.396188	0.403432	0.944076	0.739136	0.923656	0.373726	-1.41995	down
GO:0004252	serine-type endopeptidase activity	molecular_function	8	0.00408106	ENSRNOG00000046301	Gzmbl3	Granzyme B-like 3 [Source:RGD Symbol;Acc:2320502]	9.5866	12.0134	9.17037	1.23861	0.386529	2.4398	7.56969	2.92023	up
GO:0004252	serine-type endopeptidase activity	molecular_function	8	0.00408106	ENSRNOG00000049919	LOC691670	similar to natural killer cell protease 7 [Source:RGD Symbol;Acc:1597224]	0.825562	1.04608	0.608183	0	0.175413	0.15399	7.52826	2.91232	up
GO:0004252	serine-type endopeptidase activity	molecular_function	8	0.00408106	ENSRNOG00000050198	Gzmbl1	Granszyme B-like 1 [Source:RGD Symbol;Acc:1561819]	1.6177	4.11414	2.13787	0.277909	0.052331	0.237429	13.8632	3.79319	up
GO:0070207	protein homotrimerization	biological_process	9	0.00447301	ENSRNOG00000013304	Arg1	arginase 1 [Source:RGD Symbol;Acc:2150]	14.1945	11.7175	9.74681	5.09255	6.15658	5.0671	2.18549	1.12795	up
GO:0070207	protein homotrimerization	biological_process	9	0.00447301	ENSRNOG00000014075	Clybl	citrate lyase beta like [Source:RGD Symbol;Acc:1304615]	0.568797	0.531304	0.471414	1.20744	1.2182	1.78419	0.373296	-1.42161	down
GO:0070207	protein homotrimerization	biological_process	9	0.00447301	ENSRNOG00000014398	Scara5	scavenger receptor class A, member 5 [Source:RGD Symbol;Acc:1306539]	2.21572	1.73413	2.82895	4.67709	3.10302	6.24355	0.483384	-1.04876	down
GO:0004180	carboxypeptidase activity	molecular_function	8	0.00447301	ENSRNOG00000008947	Cpz	carboxypeptidase Z [Source:RGD Symbol;Acc:620496]	3.96244	4.46341	5.17347	7.58641	9.99263	9.74149	0.497769	-1.00645	down
GO:0004180	carboxypeptidase activity	molecular_function	8	0.00447301	ENSRNOG00000009172	Cpvl	carboxypeptidase, vitellogenic-like [Source:RGD Symbol;Acc:1563609]	0.429546	0.839735	0.861303	1.33746	1.63038	2.02442	0.426778	-1.22844	down
GO:0004180	carboxypeptidase activity	molecular_function	8	0.00447301	ENSRNOG00000010935	Cpb2	carboxypeptidase B2 [Source:RGD Symbol;Acc:71035]	0.244928	0.291876	0.095584	0	0	0	2107.96	11.0416	up
GO:0042472	inner ear morphogenesis	biological_process	6	0.00484496	ENSRNOG00000007765	Frzb	frizzled-related protein [Source:RGD Symbol;Acc:1311315]	0.835247	1.32762	1.13202	2.30154	1.72858	2.68979	0.490317	-1.02821	down
GO:0042472	inner ear morphogenesis	biological_process	6	0.00484496	ENSRNOG00000015618	Wnt5a	Wnt family member 5A [Source:RGD Symbol;Acc:69250]	3.0348	2.5955	2.2052	6.68335	4.54321	6.14645	0.451016	-1.14875	down
GO:0042472	inner ear morphogenesis	biological_process	6	0.00484496	ENSRNOG00000026203	Pax8	paired box 8 [Source:RGD Symbol;Acc:620434]	0.878829	0.821269	0.820972	0.21796	0.383172	0.130189	3.44728	1.78546	up
GO:0042472	inner ear morphogenesis	biological_process	6	0.00484496	ENSRNOG00000053232	Ror2	receptor tyrosine kinase-like orphan receptor 2 [Source:RGD Symbol;Acc:1305275]	0.93753	0.843785	1.20048	2.20838	2.23265	2.21271	0.448138	-1.15799	down
GO:0071320	cellular response to cAMP	biological_process	9	0.00484496	ENSRNOG00000001821	Adipoq	adiponectin, C1Q and collagen domain containing [Source:RGD Symbol;Acc:628748]	0.269142	0.528074	0.422021	2.31808	1.93395	13.321	0.0693811	-3.84931	down
GO:0071320	cellular response to cAMP	biological_process	9	0.00484496	ENSRNOG00000008943	Penk	proenkephalin [Source:RGD Symbol;Acc:68946]	1.132	1.55783	3.43566	0.621514	0.959967	0.863637	2.50519	1.32492	up
GO:0071320	cellular response to cAMP	biological_process	9	0.00484496	ENSRNOG00000028616	Pck1	phosphoenolpyruvate carboxykinase 1 [Source:RGD Symbol;Acc:3267]	0.294123	0.258891	0.731558	1.09133	1.59168	18.8392	0.0596858	-4.06647	down
GO:0071320	cellular response to cAMP	biological_process	9	0.00484496	ENSRNOG00000055103	Cftr	cystic fibrosis transmembrane conductance regulator [Source:RGD Symbol;Acc:2332]	1.14851	0.941143	0.718715	2.41175	2.46834	1.29678	0.454659	-1.13714	down
GO:0071377	cellular response to glucagon stimulus	biological_process	8	0.00488015	ENSRNOG00000013304	Arg1	arginase 1 [Source:RGD Symbol;Acc:2150]	14.1945	11.7175	9.74681	5.09255	6.15658	5.0671	2.18549	1.12795	up
GO:0071377	cellular response to glucagon stimulus	biological_process	8	0.00488015	ENSRNOG00000028616	Pck1	phosphoenolpyruvate carboxykinase 1 [Source:RGD Symbol;Acc:3267]	0.294123	0.258891	0.731558	1.09133	1.59168	18.8392	0.0596858	-4.06647	down
GO:0019869	chloride channel inhibitor activity	molecular_function	7	0.00488015	ENSRNOG00000016684	Wnk2	WNK lysine deficient protein kinase 2 [Source:RGD Symbol;Acc:1307284]	2.24948	2.78267	2.93501	1.49678	1.02756	1.17308	2.15479	1.10755	up
GO:0019869	chloride channel inhibitor activity	molecular_function	7	0.00488015	ENSRNOG00000055103	Cftr	cystic fibrosis transmembrane conductance regulator [Source:RGD Symbol;Acc:2332]	1.14851	0.941143	0.718715	2.41175	2.46834	1.29678	0.454659	-1.13714	down
GO:0071875	adrenergic receptor signaling pathway	biological_process	6	0.00488015	ENSRNOG00000013887	Adra2b	adrenoceptor alpha 2B [Source:RGD Symbol;Acc:2057]	0.311704	0.246273	0.182689	0.886988	0.676955	1.17461	0.270458	-1.88652	down
GO:0071875	adrenergic receptor signaling pathway	biological_process	6	0.00488015	ENSRNOG00000021256	Adra1d	adrenoceptor alpha 1D [Source:RGD Symbol;Acc:62064]	0.263536	0.619624	0.355989	1.74131	1.36148	1.17567	0.289625	-1.78774	down
GO:0045080	positive regulation of chemokine biosynthetic process	biological_process	9	0.00488015	ENSRNOG00000004649	Il1b	interleukin 1 beta [Source:RGD Symbol;Acc:2891]	20.4545	17.8629	26.638	9.01274	9.02768	13.4852	2.0604	1.04293	up
GO:0045080	positive regulation of chemokine biosynthetic process	biological_process	9	0.00488015	ENSRNOG00000015618	Wnt5a	Wnt family member 5A [Source:RGD Symbol;Acc:69250]	3.0348	2.5955	2.2052	6.68335	4.54321	6.14645	0.451016	-1.14875	down
GO:0055085	transmembrane transport	biological_process	6	0.00492015	ENSRNOG00000009686	Aqp7	aquaporin 7 [Source:RGD Symbol;Acc:2145]	0.04156	0.071983	0.079689	0.169014	0.259968	3.27253	0.0522035	-4.25971	down
GO:0055085	transmembrane transport	biological_process	6	0.00492015	ENSRNOG00000011133	Trpc4	transient receptor potential cation channel, subfamily C, member 4 [Source:RGD Symbol;Acc:621276]	0.047885	0.130389	0.050748	0.258961	0.381343	0.332957	0.235314	-2.08734	down
GO:0055085	transmembrane transport	biological_process	6	0.00492015	ENSRNOG00000014465	Oca2	OCA2 melanosomal transmembrane protein [Source:RGD Symbol;Acc:2318412]	0	0	0	0.101048	0.120925	0.079096	0.000996449	-9.97092	down
GO:0055085	transmembrane transport	biological_process	6	0.00492015	ENSRNOG00000016070	Trpc3	transient receptor potential cation channel, subfamily C, member 3 [Source:RGD Symbol;Acc:61973]	0.998502	0.698946	0.823061	2.01864	2.08611	2.63759	0.373833	-1.41954	down
GO:0055085	transmembrane transport	biological_process	6	0.00492015	ENSRNOG00000017226	Slc2a4	solute carrier family 2 member 4 [Source:RGD Symbol;Acc:2711]	0.725115	0.747971	0.866538	1.38289	1.35574	3.8632	0.35439	-1.49659	down
GO:0055085	transmembrane transport	biological_process	6	0.00492015	ENSRNOG00000018644	Slc6a7	solute carrier family 6 member 7 [Source:RGD Symbol;Acc:620928]	1.38866	1.04448	0.392996	0.497343	0.247701	0.272771	2.77667	1.47335	up
GO:0055085	transmembrane transport	biological_process	6	0.00492015	ENSRNOG00000020484	Trpm5	transient receptor potential cation channel, subfamily M, member 5 [Source:RGD Symbol;Acc:1310620]	5.99927	5.86911	10.0597	17.4263	11.9153	18.1559	0.461669	-1.11507	down
GO:0055085	transmembrane transport	biological_process	6	0.00492015	ENSRNOG00000029342	Scn7a	sodium voltage-gated channel alpha subunit 7 [Source:RGD Symbol;Acc:61922]	11.5574	9.24312	13.5523	34.1139	29.6192	24.4067	0.389754	-1.35936	down
GO:0055085	transmembrane transport	biological_process	6	0.00492015	ENSRNOG00000036984	Slco1a1	solute carrier organic anion transporter family, member 1a1 [Source:RGD Symbol;Acc:3700]	0.270199	0.433603	0.341127	0.058162	0.110115	0.019966	5.55096	2.47274	up
GO:0055085	transmembrane transport	biological_process	6	0.00492015	ENSRNOG00000052486	Kcna6	potassium voltage-gated channel subfamily A member 6 [Source:RGD Symbol;Acc:62083]	0.206521	0.495587	0.476457	0.150545	0.128976	0.104822	3.06644	1.61657	up
GO:0055085	transmembrane transport	biological_process	6	0.00492015	ENSRNOG00000054438	LOC292543	similar to solute carrier family 7 (cationic amino acid transporter, y+ system), member 3 [Source:RGD Symbol;Acc:1565097]	0.528722	0.612372	0.29992	0.047019	0.128095	0.082842	5.58628	2.48189	up
GO:0055085	transmembrane transport	biological_process	6	0.00492015	ENSRNOG00000055103	Cftr	cystic fibrosis transmembrane conductance regulator [Source:RGD Symbol;Acc:2332]	1.14851	0.941143	0.718715	2.41175	2.46834	1.29678	0.454659	-1.13714	down
GO:0055085	transmembrane transport	biological_process	6	0.00492015	ENSRNOG00000056697	Kcnab1	potassium voltage-gated channel subfamily A member regulatory beta subunit 1 [Source:RGD Symbol;Acc:61827]	3.31095	2.45264	1.755	1.07741	1.03743	1.28351	2.21242	1.14563	up
GO:0055085	transmembrane transport	biological_process	6	0.00492015	ENSRNOG00000058692	Slc26a4	solute carrier family 26 member 4 [Source:RGD Symbol;Acc:3293]	2.67212	1.9953	1.15691	1.03707	0.715431	0.934049	2.16796	1.11634	up
GO:0050796	regulation of insulin secretion	biological_process	10	0.00494547	ENSRNOG00000004649	Il1b	interleukin 1 beta [Source:RGD Symbol;Acc:2891]	20.4545	17.8629	26.638	9.01274	9.02768	13.4852	2.0604	1.04293	up
GO:0050796	regulation of insulin secretion	biological_process	10	0.00494547	ENSRNOG00000014448	Arntl	aryl hydrocarbon receptor nuclear translocator-like [Source:RGD Symbol;Acc:62003]	12.2717	9.27036	6.63534	7.09622	2.94619	3.24836	2.12007	1.08411	up
GO:0050796	regulation of insulin secretion	biological_process	10	0.00494547	ENSRNOG00000045797	Lep	leptin [Source:RGD Symbol;Acc:3000]	0.038354	0.031345	0.037116	0.113483	0.270256	1.22499	0.0663972	-3.91273	down
GO:0050873	brown fat cell differentiation	biological_process	7	0.00494547	ENSRNOG00000001821	Adipoq	adiponectin, C1Q and collagen domain containing [Source:RGD Symbol;Acc:628748]	0.269142	0.528074	0.422021	2.31808	1.93395	13.321	0.0693811	-3.84931	down
GO:0050873	brown fat cell differentiation	biological_process	7	0.00494547	ENSRNOG00000012674	Adrb3	adrenoceptor beta 3 [Source:RGD Symbol;Acc:2061]	0	0	0	0.089852	0.041841	1.01731	0.000261096	-11.9031	down
GO:0050873	brown fat cell differentiation	biological_process	7	0.00494547	ENSRNOG00000017226	Slc2a4	solute carrier family 2 member 4 [Source:RGD Symbol;Acc:2711]	0.725115	0.747971	0.866538	1.38289	1.35574	3.8632	0.35439	-1.49659	down
GO:0009986	cell surface	cellular_component	4	0.00497132	ENSRNOG00000001821	Adipoq	adiponectin, C1Q and collagen domain containing [Source:RGD Symbol;Acc:628748]	0.269142	0.528074	0.422021	2.31808	1.93395	13.321	0.0693811	-3.84931	down
GO:0009986	cell surface	cellular_component	4	0.00497132	ENSRNOG00000004704	Dcstamp	dendrocyte expressed seven transmembrane protein [Source:RGD Symbol;Acc:1310435]	1.90901	1.69538	1.40776	0.538062	0.697165	0.21095	3.4658	1.79319	up
GO:0009986	cell surface	cellular_component	4	0.00497132	ENSRNOG00000010617	Scube1	signal peptide, CUB domain and EGF like domain containing 1 [Source:RGD Symbol;Acc:1309015]	1.45564	1.53436	2.27365	3.64137	2.98263	4.25135	0.483999	-1.04692	down
GO:0009986	cell surface	cellular_component	4	0.00497132	ENSRNOG00000011133	Trpc4	transient receptor potential cation channel, subfamily C, member 4 [Source:RGD Symbol;Acc:621276]	0.047885	0.130389	0.050748	0.258961	0.381343	0.332957	0.235314	-2.08734	down
GO:0009986	cell surface	cellular_component	4	0.00497132	ENSRNOG00000013887	Adra2b	adrenoceptor alpha 2B [Source:RGD Symbol;Acc:2057]	0.311704	0.246273	0.182689	0.886988	0.676955	1.17461	0.270458	-1.88652	down
GO:0009986	cell surface	cellular_component	4	0.00497132	ENSRNOG00000014398	Scara5	scavenger receptor class A, member 5 [Source:RGD Symbol;Acc:1306539]	2.21572	1.73413	2.82895	4.67709	3.10302	6.24355	0.483384	-1.04876	down
GO:0009986	cell surface	cellular_component	4	0.00497132	ENSRNOG00000015618	Wnt5a	Wnt family member 5A [Source:RGD Symbol;Acc:69250]	3.0348	2.5955	2.2052	6.68335	4.54321	6.14645	0.451016	-1.14875	down
GO:0009986	cell surface	cellular_component	4	0.00497132	ENSRNOG00000017226	Slc2a4	solute carrier family 2 member 4 [Source:RGD Symbol;Acc:2711]	0.725115	0.747971	0.866538	1.38289	1.35574	3.8632	0.35439	-1.49659	down
GO:0009986	cell surface	cellular_component	4	0.00497132	ENSRNOG00000033348	Duox1	dual oxidase 1 [Source:RGD Symbol;Acc:628760]	4.03322	2.15876	3.55853	1.38054	1.11797	1.15612	2.668	1.41576	up
GO:0009986	cell surface	cellular_component	4	0.00497132	ENSRNOG00000049590	RT1-M2	RT1 class Ib, locus M2 [Source:RGD Symbol;Acc:3493]	1.05738	0.72803	0.844597	0.257868	0	0.133657	6.71734	2.74789	up
GO:0009986	cell surface	cellular_component	4	0.00497132	ENSRNOG00000053232	Ror2	receptor tyrosine kinase-like orphan receptor 2 [Source:RGD Symbol;Acc:1305275]	0.93753	0.843785	1.20048	2.20838	2.23265	2.21271	0.448138	-1.15799	down
GO:0009986	cell surface	cellular_component	4	0.00497132	ENSRNOG00000055103	Cftr	cystic fibrosis transmembrane conductance regulator [Source:RGD Symbol;Acc:2332]	1.14851	0.941143	0.718715	2.41175	2.46834	1.29678	0.454659	-1.13714	down
GO:0009986	cell surface	cellular_component	4	0.00497132	ENSRNOG00000057189	LOC103690326	dendritic cell-specific transmembrane protein [Source:RGD Symbol;Acc:9418155]	2.02057	1.81366	1.48448	0.681452	0.577721	0.225501	3.58241	1.84093	up
GO:0030141	secretory granule	cellular_component	8	0.00525207	ENSRNOG00000003897	Col1a1	collagen type I alpha 1 chain [Source:RGD Symbol;Acc:61817]	21.9343	20.0594	21.0288	58.1167	63.4283	51.677	0.363825	-1.45869	down
GO:0030141	secretory granule	cellular_component	8	0.00525207	ENSRNOG00000004649	Il1b	interleukin 1 beta [Source:RGD Symbol;Acc:2891]	20.4545	17.8629	26.638	9.01274	9.02768	13.4852	2.0604	1.04293	up
GO:0030141	secretory granule	cellular_component	8	0.00525207	ENSRNOG00000006565	Fstl4	follistatin-like 4 [Source:RGD Symbol;Acc:1307227]	1.13651	0.735415	0.132085	0.200113	0.165783	0.097167	4.32773	2.11361	up
GO:0030141	secretory granule	cellular_component	8	0.00525207	ENSRNOG00000008001	Rab3b	RAB3B, member RAS oncogene family [Source:RGD Symbol;Acc:620922]	2.76153	1.88236	3.18417	4.52952	5.74434	6.11997	0.4775	-1.06643	down
GO:0030141	secretory granule	cellular_component	8	0.00525207	ENSRNOG00000060831	Clca1	chloride channel accessory 1 [Source:RGD Symbol;Acc:1306258]	0.066168	0.138958	0.180644	1.43964	0.094998	1.08019	0.147532	-2.7609	down
GO:0006954	inflammatory response	biological_process	6	0.0056039	ENSRNOG00000002792	Cxcl2	C-X-C motif chemokine ligand 2 [Source:RGD Symbol;Acc:70069]	2.49155	1.56141	2.22508	0.21844	0.639161	0.597588	4.31425	2.10911	up
GO:0006954	inflammatory response	biological_process	6	0.0056039	ENSRNOG00000004649	Il1b	interleukin 1 beta [Source:RGD Symbol;Acc:2891]	20.4545	17.8629	26.638	9.01274	9.02768	13.4852	2.0604	1.04293	up
GO:0006954	inflammatory response	biological_process	6	0.0056039	ENSRNOG00000004725	Cela1	chymotrypsin like elastase 1 [Source:RGD Symbol;Acc:2547]	25.6612	19.6849	15.4892	7.22067	12.5953	7.85221	2.19875	1.13668	up
GO:0006954	inflammatory response	biological_process	6	0.0056039	ENSRNOG00000014524	S1pr3	sphingosine-1-phosphate receptor 3 [Source:RGD Symbol;Acc:1583843]	9.98579	9.09143	8.73488	22.3581	16.5395	25.1183	0.434456	-1.20272	down
GO:0006954	inflammatory response	biological_process	6	0.0056039	ENSRNOG00000018899	C5	complement C5 [Source:RGD Symbol;Acc:2237]	1.41673	11.2071	0.792005	0.351361	0.325713	0.313456	13.5441	3.7596	up
GO:0006954	inflammatory response	biological_process	6	0.0056039	ENSRNOG00000022242	Cxcl9	C-X-C motif chemokine ligand 9 [Source:RGD Symbol;Acc:628798]	6.90616	5.99513	4.70513	2.639	3.00671	2.71353	2.10622	1.07466	up
GO:0006954	inflammatory response	biological_process	6	0.0056039	ENSRNOG00000024899	Cxcl13	C-X-C motif chemokine ligand 13 [Source:RGD Symbol;Acc:1564256]	0.505115	0.912997	2.0192	4.23093	3.68046	3.58254	0.299054	-1.74152	down
GO:0006954	inflammatory response	biological_process	6	0.0056039	ENSRNOG00000028548	Ccl9	chemokine (C-C motif) ligand 9 [Source:RGD Symbol;Acc:1310563]	37.5481	17.7937	27.4866	12.7972	13.0843	8.17364	2.43218	1.28225	up
GO:0071300	cellular response to retinoic acid	biological_process	7	0.0058169	ENSRNOG00000003897	Col1a1	collagen type I alpha 1 chain [Source:RGD Symbol;Acc:61817]	21.9343	20.0594	21.0288	58.1167	63.4283	51.677	0.363825	-1.45869	down
GO:0071300	cellular response to retinoic acid	biological_process	7	0.0058169	ENSRNOG00000005592	Brinp2	BMP/retinoic acid inducible neural specific 2 [Source:RGD Symbol;Acc:708419]	0.049991	0.076611	0.187873	0.432909	0.502739	0.740238	0.187647	-2.41391	down
GO:0071300	cellular response to retinoic acid	biological_process	7	0.0058169	ENSRNOG00000028616	Pck1	phosphoenolpyruvate carboxykinase 1 [Source:RGD Symbol;Acc:3267]	0.294123	0.258891	0.731558	1.09133	1.59168	18.8392	0.0596858	-4.06647	down
GO:0071300	cellular response to retinoic acid	biological_process	7	0.0058169	ENSRNOG00000045797	Lep	leptin [Source:RGD Symbol;Acc:3000]	0.038354	0.031345	0.037116	0.113483	0.270256	1.22499	0.0663972	-3.91273	down
GO:0007188	adenylate cyclase-modulating G protein-coupled receptor signaling pathway	biological_process	7	0.00597782	ENSRNOG00000005268	Gnat3	G protein subunit alpha transducin 3 [Source:RGD Symbol;Acc:727817]	1.06101	0.850564	1.51812	3.70113	2.49755	4.15072	0.331391	-1.5934	down
GO:0007188	adenylate cyclase-modulating G protein-coupled receptor signaling pathway	biological_process	7	0.00597782	ENSRNOG00000012674	Adrb3	adrenoceptor beta 3 [Source:RGD Symbol;Acc:2061]	0	0	0	0.089852	0.041841	1.01731	0.000261096	-11.9031	down
GO:0007188	adenylate cyclase-modulating G protein-coupled receptor signaling pathway	biological_process	7	0.00597782	ENSRNOG00000013887	Adra2b	adrenoceptor alpha 2B [Source:RGD Symbol;Acc:2057]	0.311704	0.246273	0.182689	0.886988	0.676955	1.17461	0.270458	-1.88652	down
GO:0071880	adenylate cyclase-activating adrenergic receptor signaling pathway	biological_process	9	0.00605217	ENSRNOG00000012674	Adrb3	adrenoceptor beta 3 [Source:RGD Symbol;Acc:2061]	0	0	0	0.089852	0.041841	1.01731	0.000261096	-11.9031	down
GO:0071880	adenylate cyclase-activating adrenergic receptor signaling pathway	biological_process	9	0.00605217	ENSRNOG00000013887	Adra2b	adrenoceptor alpha 2B [Source:RGD Symbol;Acc:2057]	0.311704	0.246273	0.182689	0.886988	0.676955	1.17461	0.270458	-1.88652	down
GO:0050805	negative regulation of synaptic transmission	biological_process	8	0.00605217	ENSRNOG00000001821	Adipoq	adiponectin, C1Q and collagen domain containing [Source:RGD Symbol;Acc:628748]	0.269142	0.528074	0.422021	2.31808	1.93395	13.321	0.0693811	-3.84931	down
GO:0050805	negative regulation of synaptic transmission	biological_process	8	0.00605217	ENSRNOG00000004649	Il1b	interleukin 1 beta [Source:RGD Symbol;Acc:2891]	20.4545	17.8629	26.638	9.01274	9.02768	13.4852	2.0604	1.04293	up
GO:0014823	response to activity	biological_process	4	0.00616768	ENSRNOG00000001821	Adipoq	adiponectin, C1Q and collagen domain containing [Source:RGD Symbol;Acc:628748]	0.269142	0.528074	0.422021	2.31808	1.93395	13.321	0.0693811	-3.84931	down
GO:0014823	response to activity	biological_process	4	0.00616768	ENSRNOG00000016696	Angpt2	angiopoietin 2 [Source:RGD Symbol;Acc:621861]	3.01199	2.77709	3.05503	7.45684	6.76239	7.96137	0.398732	-1.32651	down
GO:0014823	response to activity	biological_process	4	0.00616768	ENSRNOG00000028616	Pck1	phosphoenolpyruvate carboxykinase 1 [Source:RGD Symbol;Acc:3267]	0.294123	0.258891	0.731558	1.09133	1.59168	18.8392	0.0596858	-4.06647	down
GO:0014823	response to activity	biological_process	4	0.00616768	ENSRNOG00000045797	Lep	leptin [Source:RGD Symbol;Acc:3000]	0.038354	0.031345	0.037116	0.113483	0.270256	1.22499	0.0663972	-3.91273	down
GO:0071560	cellular response to transforming growth factor beta stimulus	biological_process	8	0.00653224	ENSRNOG00000003897	Col1a1	collagen type I alpha 1 chain [Source:RGD Symbol;Acc:61817]	21.9343	20.0594	21.0288	58.1167	63.4283	51.677	0.363825	-1.45869	down
GO:0071560	cellular response to transforming growth factor beta stimulus	biological_process	8	0.00653224	ENSRNOG00000008943	Penk	proenkephalin [Source:RGD Symbol;Acc:68946]	1.132	1.55783	3.43566	0.621514	0.959967	0.863637	2.50519	1.32492	up
GO:0071560	cellular response to transforming growth factor beta stimulus	biological_process	8	0.00653224	ENSRNOG00000013304	Arg1	arginase 1 [Source:RGD Symbol;Acc:2150]	14.1945	11.7175	9.74681	5.09255	6.15658	5.0671	2.18549	1.12795	up
GO:0071560	cellular response to transforming growth factor beta stimulus	biological_process	8	0.00653224	ENSRNOG00000015618	Wnt5a	Wnt family member 5A [Source:RGD Symbol;Acc:69250]	3.0348	2.5955	2.2052	6.68335	4.54321	6.14645	0.451016	-1.14875	down
GO:0032869	cellular response to insulin stimulus	biological_process	8	0.00654174	ENSRNOG00000001821	Adipoq	adiponectin, C1Q and collagen domain containing [Source:RGD Symbol;Acc:628748]	0.269142	0.528074	0.422021	2.31808	1.93395	13.321	0.0693811	-3.84931	down
GO:0032869	cellular response to insulin stimulus	biological_process	8	0.00654174	ENSRNOG00000016949	Slc25a33	solute carrier family 25 member 33 [Source:RGD Symbol;Acc:1583942]	12.7926	13.8239	16.3486	29.8604	28.5655	33.4012	0.467891	-1.09576	down
GO:0032869	cellular response to insulin stimulus	biological_process	8	0.00654174	ENSRNOG00000017226	Slc2a4	solute carrier family 2 member 4 [Source:RGD Symbol;Acc:2711]	0.725115	0.747971	0.866538	1.38289	1.35574	3.8632	0.35439	-1.49659	down
GO:0032869	cellular response to insulin stimulus	biological_process	8	0.00654174	ENSRNOG00000022239	Trarg1	trafficking regulator of GLUT4 (SLC2A4) 1 [Source:RGD Symbol;Acc:1307639]	2.12065	2.24179	2.81453	5.40766	4.54121	9.15362	0.375708	-1.41232	down
GO:0032869	cellular response to insulin stimulus	biological_process	8	0.00654174	ENSRNOG00000028616	Pck1	phosphoenolpyruvate carboxykinase 1 [Source:RGD Symbol;Acc:3267]	0.294123	0.258891	0.731558	1.09133	1.59168	18.8392	0.0596858	-4.06647	down
GO:0042594	response to starvation	biological_process	5	0.00712968	ENSRNOG00000009565	Pdk4	pyruvate dehydrogenase kinase 4 [Source:RGD Symbol;Acc:69061]	4.36221	3.78789	4.40906	9.63669	7.51304	17.2593	0.364996	-1.45405	down
GO:0042594	response to starvation	biological_process	5	0.00712968	ENSRNOG00000028616	Pck1	phosphoenolpyruvate carboxykinase 1 [Source:RGD Symbol;Acc:3267]	0.294123	0.258891	0.731558	1.09133	1.59168	18.8392	0.0596858	-4.06647	down
GO:0042594	response to starvation	biological_process	5	0.00712968	ENSRNOG00000048145	Sstr1	somatostatin receptor 1 [Source:RGD Symbol;Acc:3762]	1.29021	1.61171	1.86831	0.504885	0.640927	0.601976	2.72929	1.44853	up
GO:0001666	response to hypoxia	biological_process	5	0.00727516	ENSRNOG00000001821	Adipoq	adiponectin, C1Q and collagen domain containing [Source:RGD Symbol;Acc:628748]	0.269142	0.528074	0.422021	2.31808	1.93395	13.321	0.0693811	-3.84931	down
GO:0001666	response to hypoxia	biological_process	5	0.00727516	ENSRNOG00000005650	Pgf	placental growth factor [Source:RGD Symbol;Acc:619850]	1.81335	1.74628	1.74662	2.71735	7.21811	5.43133	0.345306	-1.53405	down
GO:0001666	response to hypoxia	biological_process	5	0.00727516	ENSRNOG00000008943	Penk	proenkephalin [Source:RGD Symbol;Acc:68946]	1.132	1.55783	3.43566	0.621514	0.959967	0.863637	2.50519	1.32492	up
GO:0001666	response to hypoxia	biological_process	5	0.00727516	ENSRNOG00000016695	Mmp2	matrix metallopeptidase 2 [Source:RGD Symbol;Acc:621316]	30.7938	26.2646	32.2348	67.5082	55.093	74.8328	0.452269	-1.14475	down
GO:0001666	response to hypoxia	biological_process	5	0.00727516	ENSRNOG00000016696	Angpt2	angiopoietin 2 [Source:RGD Symbol;Acc:621861]	3.01199	2.77709	3.05503	7.45684	6.76239	7.96137	0.398732	-1.32651	down
GO:0001666	response to hypoxia	biological_process	5	0.00727516	ENSRNOG00000019500	Cyp1a1	cytochrome P450, family 1, subfamily a, polypeptide 1 [Source:RGD Symbol;Acc:2458]	1.30617	2.01733	6.01601	22.1476	22.9681	33.3498	0.119027	-3.07064	down
GO:0001666	response to hypoxia	biological_process	5	0.00727516	ENSRNOG00000045797	Lep	leptin [Source:RGD Symbol;Acc:3000]	0.038354	0.031345	0.037116	0.113483	0.270256	1.22499	0.0663972	-3.91273	down
GO:0045667	regulation of osteoblast differentiation	biological_process	7	0.00733892	ENSRNOG00000005998	Smoc1	SPARC related modular calcium binding 1 [Source:RGD Symbol;Acc:1303126]	0.114421	0.045347	0.087508	0.572383	0.198529	0.948046	0.143852	-2.79734	down
GO:0045667	regulation of osteoblast differentiation	biological_process	7	0.00733892	ENSRNOG00000025120	Gli1	GLI family zinc finger 1 [Source:RGD Symbol;Acc:621673]	0.698325	0.477126	0.544131	1.56395	1.68971	1.52278	0.360013	-1.47388	down
GO:0002024	diet induced thermogenesis	biological_process	5	0.00733892	ENSRNOG00000012674	Adrb3	adrenoceptor beta 3 [Source:RGD Symbol;Acc:2061]	0	0	0	0.089852	0.041841	1.01731	0.000261096	-11.9031	down
GO:0002024	diet induced thermogenesis	biological_process	5	0.00733892	ENSRNOG00000033209	Bmp8b	bone morphogenetic protein 8b [Source:RGD Symbol;Acc:1591873]	1.03207	1.66145	1.31074	0.262554	0.64986	0.54328	2.75076	1.45983	up
GO:0006790	sulfur compound metabolic process	biological_process	5	0.00733892	ENSRNOG00000000572	Chst3	carbohydrate sulfotransferase 3 [Source:RGD Symbol;Acc:620355]	1.16179	1.79049	1.49114	6.49275	3.57535	2.86355	0.343608	-1.54116	down
GO:0006790	sulfur compound metabolic process	biological_process	5	0.00733892	ENSRNOG00000026203	Pax8	paired box 8 [Source:RGD Symbol;Acc:620434]	0.878829	0.821269	0.820972	0.21796	0.383172	0.130189	3.44728	1.78546	up
GO:0006839	mitochondrial transport	biological_process	6	0.00733892	ENSRNOG00000003580	Ucp1	uncoupling protein 1 [Source:RGD Symbol;Acc:3931]	0	0	0	0	0	12.6582	2.37001e-05	-15.3647	down
GO:0006839	mitochondrial transport	biological_process	6	0.00733892	ENSRNOG00000046239	LOC100909612	mitochondrial brown fat uncoupling protein 1-like [Source:RGD Symbol;Acc:6502621]	0	0	0	0	0	5.27305	5.68931e-05	-14.1014	down
GO:0070365	hepatocyte differentiation	biological_process	7	0.00733892	ENSRNOG00000019500	Cyp1a1	cytochrome P450, family 1, subfamily a, polypeptide 1 [Source:RGD Symbol;Acc:2458]	1.30617	2.01733	6.01601	22.1476	22.9681	33.3498	0.119027	-3.07064	down
GO:0070365	hepatocyte differentiation	biological_process	7	0.00733892	ENSRNOG00000028616	Pck1	phosphoenolpyruvate carboxykinase 1 [Source:RGD Symbol;Acc:3267]	0.294123	0.258891	0.731558	1.09133	1.59168	18.8392	0.0596858	-4.06647	down
GO:0042593	glucose homeostasis	biological_process	8	0.00741404	ENSRNOG00000001821	Adipoq	adiponectin, C1Q and collagen domain containing [Source:RGD Symbol;Acc:628748]	0.269142	0.528074	0.422021	2.31808	1.93395	13.321	0.0693811	-3.84931	down
GO:0042593	glucose homeostasis	biological_process	8	0.00741404	ENSRNOG00000009565	Pdk4	pyruvate dehydrogenase kinase 4 [Source:RGD Symbol;Acc:69061]	4.36221	3.78789	4.40906	9.63669	7.51304	17.2593	0.364996	-1.45405	down
GO:0042593	glucose homeostasis	biological_process	8	0.00741404	ENSRNOG00000017226	Slc2a4	solute carrier family 2 member 4 [Source:RGD Symbol;Acc:2711]	0.725115	0.747971	0.866538	1.38289	1.35574	3.8632	0.35439	-1.49659	down
GO:0042593	glucose homeostasis	biological_process	8	0.00741404	ENSRNOG00000028616	Pck1	phosphoenolpyruvate carboxykinase 1 [Source:RGD Symbol;Acc:3267]	0.294123	0.258891	0.731558	1.09133	1.59168	18.8392	0.0596858	-4.06647	down
GO:0042593	glucose homeostasis	biological_process	8	0.00741404	ENSRNOG00000045797	Lep	leptin [Source:RGD Symbol;Acc:3000]	0.038354	0.031345	0.037116	0.113483	0.270256	1.22499	0.0663972	-3.91273	down
GO:0005509	calcium ion binding	molecular_function	7	0.00780516	ENSRNOG00000000341	Nid2	nidogen 2 [Source:RGD Symbol;Acc:1311685]	2.31282	2.30347	2.63372	6.44043	3.59282	6.79857	0.430732	-1.21514	down
GO:0005509	calcium ion binding	molecular_function	7	0.00780516	ENSRNOG00000002461	Nid1	nidogen 1 [Source:RGD Symbol;Acc:3178]	7.0868	7.3753	8.23495	25.6053	16.1071	15.6315	0.395806	-1.33713	down
GO:0005509	calcium ion binding	molecular_function	7	0.00780516	ENSRNOG00000005345	Vsnl1	visinin-like 1 [Source:RGD Symbol;Acc:3966]	3.32119	2.25945	2.2958	5.8539	5.06962	5.59122	0.476934	-1.06814	down
GO:0005509	calcium ion binding	molecular_function	7	0.00780516	ENSRNOG00000005998	Smoc1	SPARC related modular calcium binding 1 [Source:RGD Symbol;Acc:1303126]	0.114421	0.045347	0.087508	0.572383	0.198529	0.948046	0.143852	-2.79734	down
GO:0005509	calcium ion binding	molecular_function	7	0.00780516	ENSRNOG00000006565	Fstl4	follistatin-like 4 [Source:RGD Symbol;Acc:1307227]	1.13651	0.735415	0.132085	0.200113	0.165783	0.097167	4.32773	2.11361	up
GO:0005509	calcium ion binding	molecular_function	7	0.00780516	ENSRNOG00000010617	Scube1	signal peptide, CUB domain and EGF like domain containing 1 [Source:RGD Symbol;Acc:1309015]	1.45564	1.53436	2.27365	3.64137	2.98263	4.25135	0.483999	-1.04692	down
GO:0005509	calcium ion binding	molecular_function	7	0.00780516	ENSRNOG00000012058	Egflam	EGF-like, fibronectin type III and laminin G domains [Source:RGD Symbol;Acc:1306592]	2.05351	2.02171	3.25163	5.82235	4.33722	6.77696	0.432607	-1.20887	down
GO:0005509	calcium ion binding	molecular_function	7	0.00780516	ENSRNOG00000012094	Ltbp2	latent transforming growth factor beta binding protein 2 [Source:RGD Symbol;Acc:68380]	13.8809	17.5958	18.0348	40.4369	33.2928	42.9138	0.424469	-1.23627	down
GO:0005509	calcium ion binding	molecular_function	7	0.00780516	ENSRNOG00000012367	Pcdh7	protocadherin 7 [Source:RGD Symbol;Acc:1303209]	0.812085	0.617343	0.767092	1.37347	2.74181	1.534	0.388814	-1.36285	down
GO:0005509	calcium ion binding	molecular_function	7	0.00780516	ENSRNOG00000013306	Pcdh20	protocadherin 20 [Source:RGD Symbol;Acc:1306297]	0.199983	0.074123	0.181417	0.636184	0.284763	0.574304	0.304647	-1.71479	down
GO:0005509	calcium ion binding	molecular_function	7	0.00780516	ENSRNOG00000015220	Crtac1	cartilage acidic protein 1 [Source:RGD Symbol;Acc:621085]	0.450903	0.218255	0.403717	0.111445	0.0423887	0.0200992	6.16833	2.62488	up
GO:0005509	calcium ion binding	molecular_function	7	0.00780516	ENSRNOG00000019163	Syt6	synaptotagmin 6 [Source:RGD Symbol;Acc:62012]	0.1703	0.178842	0.252158	0.527108	0.644704	0.817466	0.30227	-1.72609	down
GO:0005509	calcium ion binding	molecular_function	7	0.00780516	ENSRNOG00000020054	LOC108348201	protocadherin beta-7-like [Source:RGD Symbol;Acc:11368541]	0.582061	0.474989	0.669141	1.45791	0.928726	1.18222	0.483683	-1.04787	down
GO:0005509	calcium ion binding	molecular_function	7	0.00780516	ENSRNOG00000033348	Duox1	dual oxidase 1 [Source:RGD Symbol;Acc:628760]	4.03322	2.15876	3.55853	1.38054	1.11797	1.15612	2.668	1.41576	up
GO:0005509	calcium ion binding	molecular_function	7	0.00780516	ENSRNOG00000056746	Tchh	trichohyalin [Source:RGD Symbol;Acc:1309635]	2.07483	2.3066	1.90934	1.19183	1.02438	0.811988	2.0774	1.05478	up
GO:0060071	Wnt signaling pathway, planar cell polarity pathway	biological_process	9	0.0087375	ENSRNOG00000015618	Wnt5a	Wnt family member 5A [Source:RGD Symbol;Acc:69250]	3.0348	2.5955	2.2052	6.68335	4.54321	6.14645	0.451016	-1.14875	down
GO:0060071	Wnt signaling pathway, planar cell polarity pathway	biological_process	9	0.0087375	ENSRNOG00000053232	Ror2	receptor tyrosine kinase-like orphan receptor 2 [Source:RGD Symbol;Acc:1305275]	0.93753	0.843785	1.20048	2.20838	2.23265	2.21271	0.448138	-1.15799	down
GO:0050930	induction of positive chemotaxis	biological_process	10	0.0087375	ENSRNOG00000005650	Pgf	placental growth factor [Source:RGD Symbol;Acc:619850]	1.81335	1.74628	1.74662	2.71735	7.21811	5.43133	0.345306	-1.53405	down
GO:0050930	induction of positive chemotaxis	biological_process	10	0.0087375	ENSRNOG00000022242	Cxcl9	C-X-C motif chemokine ligand 9 [Source:RGD Symbol;Acc:628798]	6.90616	5.99513	4.70513	2.639	3.00671	2.71353	2.10622	1.07466	up
GO:0015106	bicarbonate transmembrane transporter activity	molecular_function	8	0.0087375	ENSRNOG00000055103	Cftr	cystic fibrosis transmembrane conductance regulator [Source:RGD Symbol;Acc:2332]	1.14851	0.941143	0.718715	2.41175	2.46834	1.29678	0.454659	-1.13714	down
GO:0015106	bicarbonate transmembrane transporter activity	molecular_function	8	0.0087375	ENSRNOG00000058692	Slc26a4	solute carrier family 26 member 4 [Source:RGD Symbol;Acc:3293]	2.67212	1.9953	1.15691	1.03707	0.715431	0.934049	2.16796	1.11634	up
GO:0090090	negative regulation of canonical Wnt signaling pathway	biological_process	10	0.00939592	ENSRNOG00000007765	Frzb	frizzled-related protein [Source:RGD Symbol;Acc:1311315]	0.835247	1.32762	1.13202	2.30154	1.72858	2.68979	0.490317	-1.02821	down
GO:0090090	negative regulation of canonical Wnt signaling pathway	biological_process	10	0.00939592	ENSRNOG00000015618	Wnt5a	Wnt family member 5A [Source:RGD Symbol;Acc:69250]	3.0348	2.5955	2.2052	6.68335	4.54321	6.14645	0.451016	-1.14875	down
GO:0090090	negative regulation of canonical Wnt signaling pathway	biological_process	10	0.00939592	ENSRNOG00000025120	Gli1	GLI family zinc finger 1 [Source:RGD Symbol;Acc:621673]	0.698325	0.477126	0.544131	1.56395	1.68971	1.52278	0.360013	-1.47388	down
GO:0090090	negative regulation of canonical Wnt signaling pathway	biological_process	10	0.00939592	ENSRNOG00000032828	Mapk8ip2	mitogen-activated protein kinase 8 interacting protein 2 [Source:RGD Symbol;Acc:1309727]	0	0.011052	0	0.164696	0.033483	0.104562	0.0365065	-4.7757	down
GO:0090090	negative regulation of canonical Wnt signaling pathway	biological_process	10	0.00939592	ENSRNOG00000053232	Ror2	receptor tyrosine kinase-like orphan receptor 2 [Source:RGD Symbol;Acc:1305275]	0.93753	0.843785	1.20048	2.20838	2.23265	2.21271	0.448138	-1.15799	down
GO:0032870	cellular response to hormone stimulus	biological_process	6	0.00980415	ENSRNOG00000003580	Ucp1	uncoupling protein 1 [Source:RGD Symbol;Acc:3931]	0	0	0	0	0	12.6582	2.37001e-05	-15.3647	down
GO:0032870	cellular response to hormone stimulus	biological_process	6	0.00980415	ENSRNOG00000004537	Rxrg	retinoid X receptor gamma [Source:RGD Symbol;Acc:620046]	1.28978	1.42628	2.23642	3.66221	2.84174	4.15561	0.464605	-1.10592	down
GO:0032870	cellular response to hormone stimulus	biological_process	6	0.00980415	ENSRNOG00000005650	Pgf	placental growth factor [Source:RGD Symbol;Acc:619850]	1.81335	1.74628	1.74662	2.71735	7.21811	5.43133	0.345306	-1.53405	down
GO:0070679	inositol 1,4,5 trisphosphate binding	molecular_function	6	0.0102451	ENSRNOG00000011133	Trpc4	transient receptor potential cation channel, subfamily C, member 4 [Source:RGD Symbol;Acc:621276]	0.047885	0.130389	0.050748	0.258961	0.381343	0.332957	0.235314	-2.08734	down
GO:0070679	inositol 1,4,5 trisphosphate binding	molecular_function	6	0.0102451	ENSRNOG00000016070	Trpc3	transient receptor potential cation channel, subfamily C, member 3 [Source:RGD Symbol;Acc:61973]	0.998502	0.698946	0.823061	2.01864	2.08611	2.63759	0.373833	-1.41954	down
GO:0048066	developmental pigmentation	biological_process	4	0.0102451	ENSRNOG00000014465	Oca2	OCA2 melanosomal transmembrane protein [Source:RGD Symbol;Acc:2318412]	0	0	0	0.101048	0.120925	0.079096	0.000996449	-9.97092	down
GO:0048066	developmental pigmentation	biological_process	4	0.0102451	ENSRNOG00000015774	Mreg	melanoregulin [Source:RGD Symbol;Acc:1562333]	0.826137	1.91827	1.79114	0.453484	0.431069	0.6671	2.92304	1.54747	up
GO:0033197	response to vitamin E	biological_process	7	0.0102451	ENSRNOG00000013304	Arg1	arginase 1 [Source:RGD Symbol;Acc:2150]	14.1945	11.7175	9.74681	5.09255	6.15658	5.0671	2.18549	1.12795	up
GO:0033197	response to vitamin E	biological_process	7	0.0102451	ENSRNOG00000045797	Lep	leptin [Source:RGD Symbol;Acc:3000]	0.038354	0.031345	0.037116	0.113483	0.270256	1.22499	0.0663972	-3.91273	down
GO:0045599	negative regulation of fat cell differentiation	biological_process	8	0.0105519	ENSRNOG00000001821	Adipoq	adiponectin, C1Q and collagen domain containing [Source:RGD Symbol;Acc:628748]	0.269142	0.528074	0.422021	2.31808	1.93395	13.321	0.0693811	-3.84931	down
GO:0045599	negative regulation of fat cell differentiation	biological_process	8	0.0105519	ENSRNOG00000014448	Arntl	aryl hydrocarbon receptor nuclear translocator-like [Source:RGD Symbol;Acc:62003]	12.2717	9.27036	6.63534	7.09622	2.94619	3.24836	2.12007	1.08411	up
GO:0045599	negative regulation of fat cell differentiation	biological_process	8	0.0105519	ENSRNOG00000015618	Wnt5a	Wnt family member 5A [Source:RGD Symbol;Acc:69250]	3.0348	2.5955	2.2052	6.68335	4.54321	6.14645	0.451016	-1.14875	down
GO:0034220	ion transmembrane transport	biological_process	7	0.010775	ENSRNOG00000002303	Kcnj12	potassium voltage-gated channel subfamily J member 12 [Source:RGD Symbol;Acc:621660]	1.13507	0.91256	0.709237	2.64599	1.68286	2.79866	0.386793	-1.37037	down
GO:0034220	ion transmembrane transport	biological_process	7	0.010775	ENSRNOG00000015089	Mcoln2	mucolipin 2 [Source:RGD Symbol;Acc:1308884]	7.1303	6.82353	5.88089	3.61028	2.8491	3.26985	2.03867	1.02763	up
GO:0034220	ion transmembrane transport	biological_process	7	0.010775	ENSRNOG00000020484	Trpm5	transient receptor potential cation channel, subfamily M, member 5 [Source:RGD Symbol;Acc:1310620]	5.99927	5.86911	10.0597	17.4263	11.9153	18.1559	0.461669	-1.11507	down
GO:0034220	ion transmembrane transport	biological_process	7	0.010775	ENSRNOG00000032417	Gabrp	gamma-aminobutyric acid type A receptor pi subunit [Source:RGD Symbol;Acc:620532]	0.092348	0.19525	0.36241	0.951681	0.704935	1.06596	0.238747	-2.06644	down
GO:0034220	ion transmembrane transport	biological_process	7	0.010775	ENSRNOG00000056697	Kcnab1	potassium voltage-gated channel subfamily A member regulatory beta subunit 1 [Source:RGD Symbol;Acc:61827]	3.31095	2.45264	1.755	1.07741	1.03743	1.28351	2.21242	1.14563	up
GO:0034220	ion transmembrane transport	biological_process	7	0.010775	ENSRNOG00000060831	Clca1	chloride channel accessory 1 [Source:RGD Symbol;Acc:1306258]	0.066168	0.138958	0.180644	1.43964	0.094998	1.08019	0.147532	-2.7609	down
GO:0034765	regulation of ion transmembrane transport	biological_process	8	0.0113045	ENSRNOG00000002303	Kcnj12	potassium voltage-gated channel subfamily J member 12 [Source:RGD Symbol;Acc:621660]	1.13507	0.91256	0.709237	2.64599	1.68286	2.79866	0.386793	-1.37037	down
GO:0034765	regulation of ion transmembrane transport	biological_process	8	0.0113045	ENSRNOG00000029342	Scn7a	sodium voltage-gated channel alpha subunit 7 [Source:RGD Symbol;Acc:61922]	11.5574	9.24312	13.5523	34.1139	29.6192	24.4067	0.389754	-1.35936	down
GO:0034765	regulation of ion transmembrane transport	biological_process	8	0.0113045	ENSRNOG00000052486	Kcna6	potassium voltage-gated channel subfamily A member 6 [Source:RGD Symbol;Acc:62083]	0.206521	0.495587	0.476457	0.150545	0.128976	0.104822	3.06644	1.61657	up
GO:0034765	regulation of ion transmembrane transport	biological_process	8	0.0113045	ENSRNOG00000056697	Kcnab1	potassium voltage-gated channel subfamily A member regulatory beta subunit 1 [Source:RGD Symbol;Acc:61827]	3.31095	2.45264	1.755	1.07741	1.03743	1.28351	2.21242	1.14563	up
GO:0034765	regulation of ion transmembrane transport	biological_process	8	0.0113045	ENSRNOG00000057221	Scn3b	sodium voltage-gated channel beta subunit 3 [Source:RGD Symbol;Acc:621657]	21.0976	17.1091	25.2416	51.1686	32.1861	48.604	0.480819	-1.05643	down
GO:0009409	response to cold	biological_process	5	0.0113318	ENSRNOG00000003580	Ucp1	uncoupling protein 1 [Source:RGD Symbol;Acc:3931]	0	0	0	0	0	12.6582	2.37001e-05	-15.3647	down
GO:0009409	response to cold	biological_process	5	0.0113318	ENSRNOG00000012674	Adrb3	adrenoceptor beta 3 [Source:RGD Symbol;Acc:2061]	0	0	0	0.089852	0.041841	1.01731	0.000261096	-11.9031	down
GO:0009409	response to cold	biological_process	5	0.0113318	ENSRNOG00000046239	LOC100909612	mitochondrial brown fat uncoupling protein 1-like [Source:RGD Symbol;Acc:6502621]	0	0	0	0	0	5.27305	5.68931e-05	-14.1014	down
GO:0071347	cellular response to interleukin-1	biological_process	8	0.0115133	ENSRNOG00000002792	Cxcl2	C-X-C motif chemokine ligand 2 [Source:RGD Symbol;Acc:70069]	2.49155	1.56141	2.22508	0.21844	0.639161	0.597588	4.31425	2.10911	up
GO:0071347	cellular response to interleukin-1	biological_process	8	0.0115133	ENSRNOG00000018865	Adamts12	ADAM metallopeptidase with thrombospondin type 1 motif, 12 [Source:RGD Symbol;Acc:1307323]	1.22778	1.39158	1.85944	4.25796	2.71078	3.8658	0.413382	-1.27445	down
GO:0071347	cellular response to interleukin-1	biological_process	8	0.0115133	ENSRNOG00000028548	Ccl9	chemokine (C-C motif) ligand 9 [Source:RGD Symbol;Acc:1310563]	37.5481	17.7937	27.4866	12.7972	13.0843	8.17364	2.43218	1.28225	up
GO:0071347	cellular response to interleukin-1	biological_process	8	0.0115133	ENSRNOG00000028616	Pck1	phosphoenolpyruvate carboxykinase 1 [Source:RGD Symbol;Acc:3267]	0.294123	0.258891	0.731558	1.09133	1.59168	18.8392	0.0596858	-4.06647	down
GO:0007565	female pregnancy	biological_process	5	0.0115133	ENSRNOG00000005650	Pgf	placental growth factor [Source:RGD Symbol;Acc:619850]	1.81335	1.74628	1.74662	2.71735	7.21811	5.43133	0.345306	-1.53405	down
GO:0007565	female pregnancy	biological_process	5	0.0115133	ENSRNOG00000013304	Arg1	arginase 1 [Source:RGD Symbol;Acc:2150]	14.1945	11.7175	9.74681	5.09255	6.15658	5.0671	2.18549	1.12795	up
GO:0007565	female pregnancy	biological_process	5	0.0115133	ENSRNOG00000013887	Adra2b	adrenoceptor alpha 2B [Source:RGD Symbol;Acc:2057]	0.311704	0.246273	0.182689	0.886988	0.676955	1.17461	0.270458	-1.88652	down
GO:0007565	female pregnancy	biological_process	5	0.0115133	ENSRNOG00000045797	Lep	leptin [Source:RGD Symbol;Acc:3000]	0.038354	0.031345	0.037116	0.113483	0.270256	1.22499	0.0663972	-3.91273	down
GO:0005244	voltage-gated ion channel activity	molecular_function	9	0.0117156	ENSRNOG00000002303	Kcnj12	potassium voltage-gated channel subfamily J member 12 [Source:RGD Symbol;Acc:621660]	1.13507	0.91256	0.709237	2.64599	1.68286	2.79866	0.386793	-1.37037	down
GO:0005244	voltage-gated ion channel activity	molecular_function	9	0.0117156	ENSRNOG00000029342	Scn7a	sodium voltage-gated channel alpha subunit 7 [Source:RGD Symbol;Acc:61922]	11.5574	9.24312	13.5523	34.1139	29.6192	24.4067	0.389754	-1.35936	down
GO:0005244	voltage-gated ion channel activity	molecular_function	9	0.0117156	ENSRNOG00000052486	Kcna6	potassium voltage-gated channel subfamily A member 6 [Source:RGD Symbol;Acc:62083]	0.206521	0.495587	0.476457	0.150545	0.128976	0.104822	3.06644	1.61657	up
GO:0005244	voltage-gated ion channel activity	molecular_function	9	0.0117156	ENSRNOG00000056697	Kcnab1	potassium voltage-gated channel subfamily A member regulatory beta subunit 1 [Source:RGD Symbol;Acc:61827]	3.31095	2.45264	1.755	1.07741	1.03743	1.28351	2.21242	1.14563	up
GO:0005244	voltage-gated ion channel activity	molecular_function	9	0.0117156	ENSRNOG00000057221	Scn3b	sodium voltage-gated channel beta subunit 3 [Source:RGD Symbol;Acc:621657]	21.0976	17.1091	25.2416	51.1686	32.1861	48.604	0.480819	-1.05643	down
GO:0001518	voltage-gated sodium channel complex	cellular_component	9	0.0118589	ENSRNOG00000029342	Scn7a	sodium voltage-gated channel alpha subunit 7 [Source:RGD Symbol;Acc:61922]	11.5574	9.24312	13.5523	34.1139	29.6192	24.4067	0.389754	-1.35936	down
GO:0001518	voltage-gated sodium channel complex	cellular_component	9	0.0118589	ENSRNOG00000057221	Scn3b	sodium voltage-gated channel beta subunit 3 [Source:RGD Symbol;Acc:621657]	21.0976	17.1091	25.2416	51.1686	32.1861	48.604	0.480819	-1.05643	down
GO:0061053	somite development	biological_process	7	0.0118589	ENSRNOG00000007765	Frzb	frizzled-related protein [Source:RGD Symbol;Acc:1311315]	0.835247	1.32762	1.13202	2.30154	1.72858	2.68979	0.490317	-1.02821	down
GO:0061053	somite development	biological_process	7	0.0118589	ENSRNOG00000015618	Wnt5a	Wnt family member 5A [Source:RGD Symbol;Acc:69250]	3.0348	2.5955	2.2052	6.68335	4.54321	6.14645	0.451016	-1.14875	down
GO:0010812	negative regulation of cell-substrate adhesion	biological_process	7	0.0118589	ENSRNOG00000003897	Col1a1	collagen type I alpha 1 chain [Source:RGD Symbol;Acc:61817]	21.9343	20.0594	21.0288	58.1167	63.4283	51.677	0.363825	-1.45869	down
GO:0010812	negative regulation of cell-substrate adhesion	biological_process	7	0.0118589	ENSRNOG00000016696	Angpt2	angiopoietin 2 [Source:RGD Symbol;Acc:621861]	3.01199	2.77709	3.05503	7.45684	6.76239	7.96137	0.398732	-1.32651	down
GO:1903141	negative regulation of establishment of endothelial barrier	biological_process	10	0.0119982	ENSRNOG00000014524	S1pr3	sphingosine-1-phosphate receptor 3 [Source:RGD Symbol;Acc:1583843]	9.98579	9.09143	8.73488	22.3581	16.5395	25.1183	0.434456	-1.20272	down
GO:1904934	negative regulation of cell proliferation in midbrain	biological_process	8	0.0119982	ENSRNOG00000015618	Wnt5a	Wnt family member 5A [Source:RGD Symbol;Acc:69250]	3.0348	2.5955	2.2052	6.68335	4.54321	6.14645	0.451016	-1.14875	down
GO:1902548	negative regulation of cellular response to vascular endothelial growth factor stimulus	biological_process	8	0.0119982	ENSRNOG00000018865	Adamts12	ADAM metallopeptidase with thrombospondin type 1 motif, 12 [Source:RGD Symbol;Acc:1307323]	1.22778	1.39158	1.85944	4.25796	2.71078	3.8658	0.413382	-1.27445	down
GO:0036517	chemoattraction of serotonergic neuron axon	biological_process	8	0.0119982	ENSRNOG00000015618	Wnt5a	Wnt family member 5A [Source:RGD Symbol;Acc:69250]	3.0348	2.5955	2.2052	6.68335	4.54321	6.14645	0.451016	-1.14875	down
GO:1904953	Wnt signaling pathway involved in midbrain dopaminergic neuron differentiation	biological_process	8	0.0119982	ENSRNOG00000015618	Wnt5a	Wnt family member 5A [Source:RGD Symbol;Acc:69250]	3.0348	2.5955	2.2052	6.68335	4.54321	6.14645	0.451016	-1.14875	down
GO:0045923	positive regulation of fatty acid metabolic process	biological_process	9	0.0119982	ENSRNOG00000001821	Adipoq	adiponectin, C1Q and collagen domain containing [Source:RGD Symbol;Acc:628748]	0.269142	0.528074	0.422021	2.31808	1.93395	13.321	0.0693811	-3.84931	down
GO:0106138	Sec61 translocon complex binding	molecular_function	5	0.0119982	ENSRNOG00000055103	Cftr	cystic fibrosis transmembrane conductance regulator [Source:RGD Symbol;Acc:2332]	1.14851	0.941143	0.718715	2.41175	2.46834	1.29678	0.454659	-1.13714	down
GO:0047777	(3S)-citramalyl-CoA lyase activity	molecular_function	7	0.0119982	ENSRNOG00000014075	Clybl	citrate lyase beta like [Source:RGD Symbol;Acc:1304615]	0.568797	0.531304	0.471414	1.20744	1.2182	1.78419	0.373296	-1.42161	down
GO:0019341	dibenzo-p-dioxin catabolic process	biological_process	7	0.0119982	ENSRNOG00000019500	Cyp1a1	cytochrome P450, family 1, subfamily a, polypeptide 1 [Source:RGD Symbol;Acc:2458]	1.30617	2.01733	6.01601	22.1476	22.9681	33.3498	0.119027	-3.07064	down
GO:0099500	vesicle fusion to plasma membrane	biological_process	8	0.0119982	ENSRNOG00000022239	Trarg1	trafficking regulator of GLUT4 (SLC2A4) 1 [Source:RGD Symbol;Acc:1307639]	2.12065	2.24179	2.81453	5.40766	4.54121	9.15362	0.375708	-1.41232	down
GO:2000590	negative regulation of metanephric mesenchymal cell migration	biological_process	9	0.0119982	ENSRNOG00000001821	Adipoq	adiponectin, C1Q and collagen domain containing [Source:RGD Symbol;Acc:628748]	0.269142	0.528074	0.422021	2.31808	1.93395	13.321	0.0693811	-3.84931	down
GO:0046327	glycerol biosynthetic process from pyruvate	biological_process	10	0.0119982	ENSRNOG00000028616	Pck1	phosphoenolpyruvate carboxykinase 1 [Source:RGD Symbol;Acc:3267]	0.294123	0.258891	0.731558	1.09133	1.59168	18.8392	0.0596858	-4.06647	down
GO:0036473	cell death in response to oxidative stress	biological_process	5	0.0119982	ENSRNOG00000002364	Rnf112	ring finger protein 112 [Source:RGD Symbol;Acc:3986]	0.268859	0.283787	0.444264	0.501704	1.23498	0.948211	0.371303	-1.42933	down
GO:0006864	pyrimidine nucleotide transport	biological_process	9	0.0119982	ENSRNOG00000016949	Slc25a33	solute carrier family 25 member 33 [Source:RGD Symbol;Acc:1583942]	12.7926	13.8239	16.3486	29.8604	28.5655	33.4012	0.467891	-1.09576	down
GO:0099538	synaptic signaling via neuropeptide	biological_process	7	0.0119982	ENSRNOG00000008943	Penk	proenkephalin [Source:RGD Symbol;Acc:68946]	1.132	1.55783	3.43566	0.621514	0.959967	0.863637	2.50519	1.32492	up
GO:0047017	prostaglandin-F synthase activity	molecular_function	7	0.0119982	ENSRNOG00000013468	Prxl2b	peroxiredoxin like 2B [Source:RGD Symbol;Acc:1308251]	5.58863	8.10379	5.24915	3.62045	2.17249	3.54651	2.02812	1.02015	up
GO:0061354	planar cell polarity pathway involved in pericardium morphogenesis	biological_process	11	0.0119982	ENSRNOG00000015618	Wnt5a	Wnt family member 5A [Source:RGD Symbol;Acc:69250]	3.0348	2.5955	2.2052	6.68335	4.54321	6.14645	0.451016	-1.14875	down
GO:0004474	malate synthase activity	molecular_function	7	0.0119982	ENSRNOG00000014075	Clybl	citrate lyase beta like [Source:RGD Symbol;Acc:1304615]	0.568797	0.531304	0.471414	1.20744	1.2182	1.78419	0.373296	-1.42161	down
GO:1990051	activation of protein kinase C activity	biological_process	13	0.0119982	ENSRNOG00000045797	Lep	leptin [Source:RGD Symbol;Acc:3000]	0.038354	0.031345	0.037116	0.113483	0.270256	1.22499	0.0663972	-3.91273	down
GO:0031300	intrinsic component of organelle membrane	cellular_component	5	0.0119982	ENSRNOG00000015774	Mreg	melanoregulin [Source:RGD Symbol;Acc:1562333]	0.826137	1.91827	1.79114	0.453484	0.431069	0.6671	2.92304	1.54747	up
GO:0106064	regulation of cobalamin metabolic process	biological_process	8	0.0119982	ENSRNOG00000014075	Clybl	citrate lyase beta like [Source:RGD Symbol;Acc:1304615]	0.568797	0.531304	0.471414	1.20744	1.2182	1.78419	0.373296	-1.42161	down
GO:0033034	positive regulation of myeloid cell apoptotic process	biological_process	10	0.0119982	ENSRNOG00000001821	Adipoq	adiponectin, C1Q and collagen domain containing [Source:RGD Symbol;Acc:628748]	0.269142	0.528074	0.422021	2.31808	1.93395	13.321	0.0693811	-3.84931	down
GO:0098694	regulation of synaptic vesicle budding from presynaptic endocytic zone membrane	biological_process	8	0.0119982	ENSRNOG00000017226	Slc2a4	solute carrier family 2 member 4 [Source:RGD Symbol;Acc:2711]	0.725115	0.747971	0.866538	1.38289	1.35574	3.8632	0.35439	-1.49659	down
GO:0019547	arginine catabolic process to ornithine	biological_process	13	0.0119982	ENSRNOG00000013304	Arg1	arginase 1 [Source:RGD Symbol;Acc:2150]	14.1945	11.7175	9.74681	5.09255	6.15658	5.0671	2.18549	1.12795	up
GO:1904651	positive regulation of fat cell apoptotic process	biological_process	10	0.0119982	ENSRNOG00000045797	Lep	leptin [Source:RGD Symbol;Acc:3000]	0.038354	0.031345	0.037116	0.113483	0.270256	1.22499	0.0663972	-3.91273	down
GO:0010021	amylopectin biosynthetic process	biological_process	7	0.0119982	ENSRNOG00000017226	Slc2a4	solute carrier family 2 member 4 [Source:RGD Symbol;Acc:2711]	0.725115	0.747971	0.866538	1.38289	1.35574	3.8632	0.35439	-1.49659	down
GO:0070994	detection of oxidative stress	biological_process	6	0.0119982	ENSRNOG00000001821	Adipoq	adiponectin, C1Q and collagen domain containing [Source:RGD Symbol;Acc:628748]	0.269142	0.528074	0.422021	2.31808	1.93395	13.321	0.0693811	-3.84931	down
GO:0060032	notochord regression	biological_process	5	0.0119982	ENSRNOG00000025120	Gli1	GLI family zinc finger 1 [Source:RGD Symbol;Acc:621673]	0.698325	0.477126	0.544131	1.56395	1.68971	1.52278	0.360013	-1.47388	down
GO:0031549	negative regulation of brain-derived neurotrophic factor receptor signaling pathway	biological_process	9	0.0119982	ENSRNOG00000006565	Fstl4	follistatin-like 4 [Source:RGD Symbol;Acc:1307227]	1.13651	0.735415	0.132085	0.200113	0.165783	0.097167	4.32773	2.11361	up
GO:0005584	collagen type I trimer	cellular_component	6	0.0119982	ENSRNOG00000003897	Col1a1	collagen type I alpha 1 chain [Source:RGD Symbol;Acc:61817]	21.9343	20.0594	21.0288	58.1167	63.4283	51.677	0.363825	-1.45869	down
GO:0017188	aspartate N-acetyltransferase activity	molecular_function	9	0.0119982	ENSRNOG00000049351	Nat8l	N-acetyltransferase 8-like [Source:RGD Symbol;Acc:1305719]	0.414609	0.359825	0.569127	1.06015	0.774246	1.71601	0.378425	-1.40192	down
GO:0120035	regulation of plasma membrane bounded cell projection organization	biological_process	8	0.0119982	ENSRNOG00000013578	Trem2	triggering receptor expressed on myeloid cells 2 [Source:RGD Symbol;Acc:1309841]	10.8948	5.01708	5.6079	3.19457	3.44342	4.12088	2.00019	1.00014	up
GO:0034592	synaptic vesicle lumen	cellular_component	4	0.0119982	ENSRNOG00000008943	Penk	proenkephalin [Source:RGD Symbol;Acc:68946]	1.132	1.55783	3.43566	0.621514	0.959967	0.863637	2.50519	1.32492	up
GO:0071298	cellular response to L-ascorbic acid	biological_process	7	0.0119982	ENSRNOG00000045797	Lep	leptin [Source:RGD Symbol;Acc:3000]	0.038354	0.031345	0.037116	0.113483	0.270256	1.22499	0.0663972	-3.91273	down
GO:0061348	planar cell polarity pathway involved in ventricular septum morphogenesis	biological_process	11	0.0119982	ENSRNOG00000015618	Wnt5a	Wnt family member 5A [Source:RGD Symbol;Acc:69250]	3.0348	2.5955	2.2052	6.68335	4.54321	6.14645	0.451016	-1.14875	down
GO:0060606	tube closure	biological_process	6	0.0119982	ENSRNOG00000015618	Wnt5a	Wnt family member 5A [Source:RGD Symbol;Acc:69250]	3.0348	2.5955	2.2052	6.68335	4.54321	6.14645	0.451016	-1.14875	down
GO:2001113	negative regulation of cellular response to hepatocyte growth factor stimulus	biological_process	8	0.0119982	ENSRNOG00000018865	Adamts12	ADAM metallopeptidase with thrombospondin type 1 motif, 12 [Source:RGD Symbol;Acc:1307323]	1.22778	1.39158	1.85944	4.25796	2.71078	3.8658	0.413382	-1.27445	down
GO:0009892	negative regulation of metabolic process	biological_process	6	0.0119982	ENSRNOG00000045797	Lep	leptin [Source:RGD Symbol;Acc:3000]	0.038354	0.031345	0.037116	0.113483	0.270256	1.22499	0.0663972	-3.91273	down
GO:1902379	chemoattractant activity involved in axon guidance	molecular_function	8	0.0119982	ENSRNOG00000015618	Wnt5a	Wnt family member 5A [Source:RGD Symbol;Acc:69250]	3.0348	2.5955	2.2052	6.68335	4.54321	6.14645	0.451016	-1.14875	down
GO:0015860	purine nucleoside transmembrane transport	biological_process	8	0.0119982	ENSRNOG00000018853	Slc28a3	solute carrier family 28 member 3 [Source:RGD Symbol;Acc:621224]	3.05653	3.81928	7.36752	12.4951	9.4451	10.0783	0.444846	-1.16862	down
GO:0002228	natural killer cell mediated immunity	biological_process	7	0.0119982	ENSRNOG00000060246	Klrd1	killer cell lectin like receptor D1 [Source:RGD Symbol;Acc:2978]	13.655	21.5233	11.2525	7.56228	4.74204	9.73844	2.1064	1.07478	up
GO:0061343	cell adhesion involved in heart morphogenesis	biological_process	5	0.0119982	ENSRNOG00000003732	Flrt2	fibronectin leucine rich transmembrane protein 2 [Source:RGD Symbol;Acc:1308574]	1.80281	2.04289	1.39731	3.1207	4.03324	3.75719	0.480519	-1.05733	down
GO:0048850	hypophysis morphogenesis	biological_process	7	0.0119982	ENSRNOG00000015618	Wnt5a	Wnt family member 5A [Source:RGD Symbol;Acc:69250]	3.0348	2.5955	2.2052	6.68335	4.54321	6.14645	0.451016	-1.14875	down
GO:1902203	negative regulation of hepatocyte growth factor receptor signaling pathway	biological_process	9	0.0119982	ENSRNOG00000018865	Adamts12	ADAM metallopeptidase with thrombospondin type 1 motif, 12 [Source:RGD Symbol;Acc:1307323]	1.22778	1.39158	1.85944	4.25796	2.71078	3.8658	0.413382	-1.27445	down
GO:1902680	positive regulation of RNA biosynthetic process	biological_process	9	0.0119982	ENSRNOG00000004649	Il1b	interleukin 1 beta [Source:RGD Symbol;Acc:2891]	20.4545	17.8629	26.638	9.01274	9.02768	13.4852	2.0604	1.04293	up
GO:0015864	pyrimidine nucleoside transport	biological_process	9	0.0119982	ENSRNOG00000018853	Slc28a3	solute carrier family 28 member 3 [Source:RGD Symbol;Acc:621224]	3.05653	3.81928	7.36752	12.4951	9.4451	10.0783	0.444846	-1.16862	down
GO:0005260	intracellularly ATP-gated chloride channel activity	molecular_function	9	0.0119982	ENSRNOG00000055103	Cftr	cystic fibrosis transmembrane conductance regulator [Source:RGD Symbol;Acc:2332]	1.14851	0.941143	0.718715	2.41175	2.46834	1.29678	0.454659	-1.13714	down
GO:0030167	proteoglycan catabolic process	biological_process	9	0.0119982	ENSRNOG00000018865	Adamts12	ADAM metallopeptidase with thrombospondin type 1 motif, 12 [Source:RGD Symbol;Acc:1307323]	1.22778	1.39158	1.85944	4.25796	2.71078	3.8658	0.413382	-1.27445	down
GO:0019543	propionate catabolic process	biological_process	8	0.0119982	ENSRNOG00000028616	Pck1	phosphoenolpyruvate carboxykinase 1 [Source:RGD Symbol;Acc:3267]	0.294123	0.258891	0.731558	1.09133	1.59168	18.8392	0.0596858	-4.06647	down
GO:0070287	ferritin receptor activity	molecular_function	4	0.0119982	ENSRNOG00000014398	Scara5	scavenger receptor class A, member 5 [Source:RGD Symbol;Acc:1306539]	2.21572	1.73413	2.82895	4.67709	3.10302	6.24355	0.483384	-1.04876	down
GO:0035505	positive regulation of myosin light chain kinase activity	biological_process	13	0.0119982	ENSRNOG00000004649	Il1b	interleukin 1 beta [Source:RGD Symbol;Acc:2891]	20.4545	17.8629	26.638	9.01274	9.02768	13.4852	2.0604	1.04293	up
GO:0015052	beta3-adrenergic receptor activity	molecular_function	10	0.0119982	ENSRNOG00000012674	Adrb3	adrenoceptor beta 3 [Source:RGD Symbol;Acc:2061]	0	0	0	0.089852	0.041841	1.01731	0.000261096	-11.9031	down
GO:0046958	nonassociative learning	biological_process	6	0.0119982	ENSRNOG00000032828	Mapk8ip2	mitogen-activated protein kinase 8 interacting protein 2 [Source:RGD Symbol;Acc:1309727]	0	0.011052	0	0.164696	0.033483	0.104562	0.0365065	-4.7757	down
GO:0015389	pyrimidine- and adenine-specific:sodium symporter activity	molecular_function	7	0.0119982	ENSRNOG00000018853	Slc28a3	solute carrier family 28 member 3 [Source:RGD Symbol;Acc:621224]	3.05653	3.81928	7.36752	12.4951	9.4451	10.0783	0.444846	-1.16862	down
GO:0015390	purine-specific nucleoside:sodium symporter activity	molecular_function	11	0.0119982	ENSRNOG00000018853	Slc28a3	solute carrier family 28 member 3 [Source:RGD Symbol;Acc:621224]	3.05653	3.81928	7.36752	12.4951	9.4451	10.0783	0.444846	-1.16862	down
GO:0045917	positive regulation of complement activation	biological_process	8	0.0119982	ENSRNOG00000004649	Il1b	interleukin 1 beta [Source:RGD Symbol;Acc:2891]	20.4545	17.8629	26.638	9.01274	9.02768	13.4852	2.0604	1.04293	up
GO:2000350	positive regulation of CD40 signaling pathway	biological_process	9	0.0119982	ENSRNOG00000013578	Trem2	triggering receptor expressed on myeloid cells 2 [Source:RGD Symbol;Acc:1309841]	10.8948	5.01708	5.6079	3.19457	3.44342	4.12088	2.00019	1.00014	up
GO:0005586	collagen type III trimer	cellular_component	6	0.0119982	ENSRNOG00000003357	Col3a1	collagen type III alpha 1 chain [Source:RGD Symbol;Acc:71029]	156.474	148.568	159.465	332.712	580.742	362.723	0.363983	-1.45806	down
GO:0032078	negative regulation of endodeoxyribonuclease activity	biological_process	11	0.0119982	ENSRNOG00000010603	Gzma	granzyme A [Source:RGD Symbol;Acc:628640]	37.3725	72.5884	41.9582	18.3746	12.8989	25.6912	2.6669	1.41516	up
GO:1902161	positive regulation of cyclic nucleotide-gated ion channel activity	biological_process	8	0.0119982	ENSRNOG00000055103	Cftr	cystic fibrosis transmembrane conductance regulator [Source:RGD Symbol;Acc:2332]	1.14851	0.941143	0.718715	2.41175	2.46834	1.29678	0.454659	-1.13714	down
GO:0050928	negative regulation of positive chemotaxis	biological_process	9	0.0119982	ENSRNOG00000016696	Angpt2	angiopoietin 2 [Source:RGD Symbol;Acc:621861]	3.01199	2.77709	3.05503	7.45684	6.76239	7.96137	0.398732	-1.32651	down
GO:0090317	negative regulation of intracellular protein transport	biological_process	9	0.0119982	ENSRNOG00000001821	Adipoq	adiponectin, C1Q and collagen domain containing [Source:RGD Symbol;Acc:628748]	0.269142	0.528074	0.422021	2.31808	1.93395	13.321	0.0693811	-3.84931	down
GO:1903082	positive regulation of C-C chemokine receptor CCR7 signaling pathway	biological_process	11	0.0119982	ENSRNOG00000013578	Trem2	triggering receptor expressed on myeloid cells 2 [Source:RGD Symbol;Acc:1309841]	10.8948	5.01708	5.6079	3.19457	3.44342	4.12088	2.00019	1.00014	up
GO:0098753	anchored component of the cytoplasmic side of the plasma membrane	cellular_component	7	0.0119982	ENSRNOG00000053804	Prmt8	protein arginine methyltransferase 8 [Source:RGD Symbol;Acc:1587677]	0.332504	0.569915	0.192181	0.028857	0	0.008121	29.6014	4.88759	up
GO:2000534	positive regulation of renal albumin absorption	biological_process	7	0.0119982	ENSRNOG00000001821	Adipoq	adiponectin, C1Q and collagen domain containing [Source:RGD Symbol;Acc:628748]	0.269142	0.528074	0.422021	2.31808	1.93395	13.321	0.0693811	-3.84931	down
GO:1901076	positive regulation of engulfment of apoptotic cell	biological_process	10	0.0119982	ENSRNOG00000013578	Trem2	triggering receptor expressed on myeloid cells 2 [Source:RGD Symbol;Acc:1309841]	10.8948	5.01708	5.6079	3.19457	3.44342	4.12088	2.00019	1.00014	up
GO:0016711	flavonoid 3'-monooxygenase activity	molecular_function	7	0.0119982	ENSRNOG00000019500	Cyp1a1	cytochrome P450, family 1, subfamily a, polypeptide 1 [Source:RGD Symbol;Acc:2458]	1.30617	2.01733	6.01601	22.1476	22.9681	33.3498	0.119027	-3.07064	down
GO:0060559	positive regulation of calcidiol 1-monooxygenase activity	biological_process	9	0.0119982	ENSRNOG00000004649	Il1b	interleukin 1 beta [Source:RGD Symbol;Acc:2891]	20.4545	17.8629	26.638	9.01274	9.02768	13.4852	2.0604	1.04293	up
GO:0048670	regulation of collateral sprouting	biological_process	7	0.0119982	ENSRNOG00000006565	Fstl4	follistatin-like 4 [Source:RGD Symbol;Acc:1307227]	1.13651	0.735415	0.132085	0.200113	0.165783	0.097167	4.32773	2.11361	up
GO:0099013	neuronal dense core vesicle lumen	cellular_component	5	0.0119982	ENSRNOG00000008943	Penk	proenkephalin [Source:RGD Symbol;Acc:68946]	1.132	1.55783	3.43566	0.621514	0.959967	0.863637	2.50519	1.32492	up
GO:0050683	AF-1 domain binding	molecular_function	6	0.0119982	ENSRNOG00000015318	Heyl	hes-related family bHLH transcription factor with YRPW motif-like [Source:RGD Symbol;Acc:1305022]	2.94339	2.74707	3.0413	7.51638	10.985	9.78336	0.308709	-1.69568	down
GO:0004939	beta-adrenergic receptor activity	molecular_function	9	0.0119982	ENSRNOG00000012674	Adrb3	adrenoceptor beta 3 [Source:RGD Symbol;Acc:2061]	0	0	0	0.089852	0.041841	1.01731	0.000261096	-11.9031	down
GO:0061347	planar cell polarity pathway involved in outflow tract morphogenesis	biological_process	11	0.0119982	ENSRNOG00000015618	Wnt5a	Wnt family member 5A [Source:RGD Symbol;Acc:69250]	3.0348	2.5955	2.2052	6.68335	4.54321	6.14645	0.451016	-1.14875	down
GO:2000486	negative regulation of glutamine transport	biological_process	10	0.0119982	ENSRNOG00000045797	Lep	leptin [Source:RGD Symbol;Acc:3000]	0.038354	0.031345	0.037116	0.113483	0.270256	1.22499	0.0663972	-3.91273	down
GO:0060587	regulation of lipoprotein lipid oxidation	biological_process	8	0.0119982	ENSRNOG00000045797	Lep	leptin [Source:RGD Symbol;Acc:3000]	0.038354	0.031345	0.037116	0.113483	0.270256	1.22499	0.0663972	-3.91273	down
GO:0007418	ventral midline development	biological_process	5	0.0119982	ENSRNOG00000025120	Gli1	GLI family zinc finger 1 [Source:RGD Symbol;Acc:621673]	0.698325	0.477126	0.544131	1.56395	1.68971	1.52278	0.360013	-1.47388	down
GO:1902618	cellular response to fluoride	biological_process	7	0.0119982	ENSRNOG00000003897	Col1a1	collagen type I alpha 1 chain [Source:RGD Symbol;Acc:61817]	21.9343	20.0594	21.0288	58.1167	63.4283	51.677	0.363825	-1.45869	down
GO:0061350	planar cell polarity pathway involved in cardiac muscle tissue morphogenesis	biological_process	11	0.0119982	ENSRNOG00000015618	Wnt5a	Wnt family member 5A [Source:RGD Symbol;Acc:69250]	3.0348	2.5955	2.2052	6.68335	4.54321	6.14645	0.451016	-1.14875	down
GO:2000612	regulation of thyroid-stimulating hormone secretion	biological_process	10	0.0119982	ENSRNOG00000026203	Pax8	paired box 8 [Source:RGD Symbol;Acc:620434]	0.878829	0.821269	0.820972	0.21796	0.383172	0.130189	3.44728	1.78546	up
GO:0070543	response to linoleic acid	biological_process	7	0.0119982	ENSRNOG00000001821	Adipoq	adiponectin, C1Q and collagen domain containing [Source:RGD Symbol;Acc:628748]	0.269142	0.528074	0.422021	2.31808	1.93395	13.321	0.0693811	-3.84931	down
GO:2000478	positive regulation of metanephric glomerular visceral epithelial cell development	biological_process	9	0.0119982	ENSRNOG00000001821	Adipoq	adiponectin, C1Q and collagen domain containing [Source:RGD Symbol;Acc:628748]	0.269142	0.528074	0.422021	2.31808	1.93395	13.321	0.0693811	-3.84931	down
GO:0005115	receptor tyrosine kinase-like orphan receptor binding	molecular_function	6	0.0119982	ENSRNOG00000015618	Wnt5a	Wnt family member 5A [Source:RGD Symbol;Acc:69250]	3.0348	2.5955	2.2052	6.68335	4.54321	6.14645	0.451016	-1.14875	down
GO:0070576	vitamin D 24-hydroxylase activity	molecular_function	5	0.0119982	ENSRNOG00000019500	Cyp1a1	cytochrome P450, family 1, subfamily a, polypeptide 1 [Source:RGD Symbol;Acc:2458]	1.30617	2.01733	6.01601	22.1476	22.9681	33.3498	0.119027	-3.07064	down
GO:1903495	cellular response to dehydroepiandrosterone	biological_process	7	0.0119982	ENSRNOG00000003580	Ucp1	uncoupling protein 1 [Source:RGD Symbol;Acc:3931]	0	0	0	0	0	12.6582	2.37001e-05	-15.3647	down
GO:0010963	regulation of L-arginine import	biological_process	9	0.0119982	ENSRNOG00000013304	Arg1	arginase 1 [Source:RGD Symbol;Acc:2150]	14.1945	11.7175	9.74681	5.09255	6.15658	5.0671	2.18549	1.12795	up
GO:0070367	negative regulation of hepatocyte differentiation	biological_process	9	0.0119982	ENSRNOG00000007765	Frzb	frizzled-related protein [Source:RGD Symbol;Acc:1311315]	0.835247	1.32762	1.13202	2.30154	1.72858	2.68979	0.490317	-1.02821	down
GO:0051867	general adaptation syndrome, behavioral process	biological_process	4	0.0119982	ENSRNOG00000008943	Penk	proenkephalin [Source:RGD Symbol;Acc:68946]	1.132	1.55783	3.43566	0.621514	0.959967	0.863637	2.50519	1.32492	up
GO:0031930	mitochondria-nucleus signaling pathway	biological_process	5	0.0119982	ENSRNOG00000016949	Slc25a33	solute carrier family 25 member 33 [Source:RGD Symbol;Acc:1583942]	12.7926	13.8239	16.3486	29.8604	28.5655	33.4012	0.467891	-1.09576	down
GO:0061349	planar cell polarity pathway involved in cardiac right atrium morphogenesis	biological_process	11	0.0119982	ENSRNOG00000015618	Wnt5a	Wnt family member 5A [Source:RGD Symbol;Acc:69250]	3.0348	2.5955	2.2052	6.68335	4.54321	6.14645	0.451016	-1.14875	down
GO:0042571	immunoglobulin complex, circulating	cellular_component	5	0.0120596	ENSRNOG00000030332	Ighg1	immunoglobulin heavy constant gamma 1 [Source:RGD Symbol;Acc:1359539]	5.53172	6.5237	33.722	1.9498	0.877678	2.30912	8.91201	3.15575	up
GO:0042571	immunoglobulin complex, circulating	cellular_component	5	0.0120596	ENSRNOG00000042319	AABR07065814		6.68222	8.72294	9.77249	5.32954	2.55509	3.63014	2.18655	1.12866	up
GO:0042571	immunoglobulin complex, circulating	cellular_component	5	0.0120596	ENSRNOG00000042569	AABR07065811		9.52239	7.43076	3.45214	1.05548	0.953026	2.96165	4.10556	2.03758	up
GO:0042571	immunoglobulin complex, circulating	cellular_component	5	0.0120596	ENSRNOG00000048159	AABR07065778		6.58067	1.09822	4.45755	0.512362	0.399594	1.25736	5.5946	2.48403	up
GO:0009314	response to radiation	biological_process	5	0.0121441	ENSRNOG00000003357	Col3a1	collagen type III alpha 1 chain [Source:RGD Symbol;Acc:71029]	156.474	148.568	159.465	332.712	580.742	362.723	0.363983	-1.45806	down
GO:0009314	response to radiation	biological_process	5	0.0121441	ENSRNOG00000008943	Penk	proenkephalin [Source:RGD Symbol;Acc:68946]	1.132	1.55783	3.43566	0.621514	0.959967	0.863637	2.50519	1.32492	up
GO:0009314	response to radiation	biological_process	5	0.0121441	ENSRNOG00000016696	Angpt2	angiopoietin 2 [Source:RGD Symbol;Acc:621861]	3.01199	2.77709	3.05503	7.45684	6.76239	7.96137	0.398732	-1.32651	down
GO:0071356	cellular response to tumor necrosis factor	biological_process	8	0.0130098	ENSRNOG00000003897	Col1a1	collagen type I alpha 1 chain [Source:RGD Symbol;Acc:61817]	21.9343	20.0594	21.0288	58.1167	63.4283	51.677	0.363825	-1.45869	down
GO:0071356	cellular response to tumor necrosis factor	biological_process	8	0.0130098	ENSRNOG00000017226	Slc2a4	solute carrier family 2 member 4 [Source:RGD Symbol;Acc:2711]	0.725115	0.747971	0.866538	1.38289	1.35574	3.8632	0.35439	-1.49659	down
GO:0071356	cellular response to tumor necrosis factor	biological_process	8	0.0130098	ENSRNOG00000018865	Adamts12	ADAM metallopeptidase with thrombospondin type 1 motif, 12 [Source:RGD Symbol;Acc:1307323]	1.22778	1.39158	1.85944	4.25796	2.71078	3.8658	0.413382	-1.27445	down
GO:0071356	cellular response to tumor necrosis factor	biological_process	8	0.0130098	ENSRNOG00000028548	Ccl9	chemokine (C-C motif) ligand 9 [Source:RGD Symbol;Acc:1310563]	37.5481	17.7937	27.4866	12.7972	13.0843	8.17364	2.43218	1.28225	up
GO:0071356	cellular response to tumor necrosis factor	biological_process	8	0.0130098	ENSRNOG00000028616	Pck1	phosphoenolpyruvate carboxykinase 1 [Source:RGD Symbol;Acc:3267]	0.294123	0.258891	0.731558	1.09133	1.59168	18.8392	0.0596858	-4.06647	down
GO:2000279	negative regulation of DNA biosynthetic process	biological_process	9	0.0135761	ENSRNOG00000001821	Adipoq	adiponectin, C1Q and collagen domain containing [Source:RGD Symbol;Acc:628748]	0.269142	0.528074	0.422021	2.31808	1.93395	13.321	0.0693811	-3.84931	down
GO:2000279	negative regulation of DNA biosynthetic process	biological_process	9	0.0135761	ENSRNOG00000008834	Dach1	dachshund family transcription factor 1 [Source:RGD Symbol;Acc:1592073]	2.70691	2.93544	4.62768	7.82299	6.27939	6.83599	0.490489	-1.02771	down
GO:0031667	response to nutrient levels	biological_process	6	0.0150391	ENSRNOG00000001821	Adipoq	adiponectin, C1Q and collagen domain containing [Source:RGD Symbol;Acc:628748]	0.269142	0.528074	0.422021	2.31808	1.93395	13.321	0.0693811	-3.84931	down
GO:0031667	response to nutrient levels	biological_process	6	0.0150391	ENSRNOG00000003580	Ucp1	uncoupling protein 1 [Source:RGD Symbol;Acc:3931]	0	0	0	0	0	12.6582	2.37001e-05	-15.3647	down
GO:0031667	response to nutrient levels	biological_process	6	0.0150391	ENSRNOG00000003897	Col1a1	collagen type I alpha 1 chain [Source:RGD Symbol;Acc:61817]	21.9343	20.0594	21.0288	58.1167	63.4283	51.677	0.363825	-1.45869	down
GO:0031667	response to nutrient levels	biological_process	6	0.0150391	ENSRNOG00000045797	Lep	leptin [Source:RGD Symbol;Acc:3000]	0.038354	0.031345	0.037116	0.113483	0.270256	1.22499	0.0663972	-3.91273	down
GO:0003823	antigen binding	molecular_function	4	0.0150391	ENSRNOG00000030332	Ighg1	immunoglobulin heavy constant gamma 1 [Source:RGD Symbol;Acc:1359539]	5.53172	6.5237	33.722	1.9498	0.877678	2.30912	8.91201	3.15575	up
GO:0003823	antigen binding	molecular_function	4	0.0150391	ENSRNOG00000042319	AABR07065814		6.68222	8.72294	9.77249	5.32954	2.55509	3.63014	2.18655	1.12866	up
GO:0003823	antigen binding	molecular_function	4	0.0150391	ENSRNOG00000042569	AABR07065811		9.52239	7.43076	3.45214	1.05548	0.953026	2.96165	4.10556	2.03758	up
GO:0003823	antigen binding	molecular_function	4	0.0150391	ENSRNOG00000048159	AABR07065778		6.58067	1.09822	4.45755	0.512362	0.399594	1.25736	5.5946	2.48403	up
GO:0034987	immunoglobulin receptor binding	molecular_function	6	0.0150391	ENSRNOG00000030332	Ighg1	immunoglobulin heavy constant gamma 1 [Source:RGD Symbol;Acc:1359539]	5.53172	6.5237	33.722	1.9498	0.877678	2.30912	8.91201	3.15575	up
GO:0034987	immunoglobulin receptor binding	molecular_function	6	0.0150391	ENSRNOG00000042319	AABR07065814		6.68222	8.72294	9.77249	5.32954	2.55509	3.63014	2.18655	1.12866	up
GO:0034987	immunoglobulin receptor binding	molecular_function	6	0.0150391	ENSRNOG00000042569	AABR07065811		9.52239	7.43076	3.45214	1.05548	0.953026	2.96165	4.10556	2.03758	up
GO:0034987	immunoglobulin receptor binding	molecular_function	6	0.0150391	ENSRNOG00000048159	AABR07065778		6.58067	1.09822	4.45755	0.512362	0.399594	1.25736	5.5946	2.48403	up
GO:0050871	positive regulation of B cell activation	biological_process	9	0.0150391	ENSRNOG00000030332	Ighg1	immunoglobulin heavy constant gamma 1 [Source:RGD Symbol;Acc:1359539]	5.53172	6.5237	33.722	1.9498	0.877678	2.30912	8.91201	3.15575	up
GO:0050871	positive regulation of B cell activation	biological_process	9	0.0150391	ENSRNOG00000042319	AABR07065814		6.68222	8.72294	9.77249	5.32954	2.55509	3.63014	2.18655	1.12866	up
GO:0050871	positive regulation of B cell activation	biological_process	9	0.0150391	ENSRNOG00000042569	AABR07065811		9.52239	7.43076	3.45214	1.05548	0.953026	2.96165	4.10556	2.03758	up
GO:0050871	positive regulation of B cell activation	biological_process	9	0.0150391	ENSRNOG00000048159	AABR07065778		6.58067	1.09822	4.45755	0.512362	0.399594	1.25736	5.5946	2.48403	up
GO:0050868	negative regulation of T cell activation	biological_process	9	0.0153941	ENSRNOG00000008816	Gpnmb	glycoprotein nmb [Source:RGD Symbol;Acc:71008]	194.008	146.217	143.748	84.0387	88.9556	65.1415	2.03234	1.02314	up
GO:0050868	negative regulation of T cell activation	biological_process	9	0.0153941	ENSRNOG00000010714	Fgl1	fibrinogen-like 1 [Source:RGD Symbol;Acc:620169]	0.921761	1.10377	0.860493	0.23436	0.488145	0.319112	2.77071	1.47026	up
GO:0090103	cochlea morphogenesis	biological_process	6	0.0153941	ENSRNOG00000007765	Frzb	frizzled-related protein [Source:RGD Symbol;Acc:1311315]	0.835247	1.32762	1.13202	2.30154	1.72858	2.68979	0.490317	-1.02821	down
GO:0090103	cochlea morphogenesis	biological_process	6	0.0153941	ENSRNOG00000015618	Wnt5a	Wnt family member 5A [Source:RGD Symbol;Acc:69250]	3.0348	2.5955	2.2052	6.68335	4.54321	6.14645	0.451016	-1.14875	down
GO:0019001	guanyl nucleotide binding	molecular_function	7	0.0153941	ENSRNOG00000005268	Gnat3	G protein subunit alpha transducin 3 [Source:RGD Symbol;Acc:727817]	1.06101	0.850564	1.51812	3.70113	2.49755	4.15072	0.331391	-1.5934	down
GO:0019001	guanyl nucleotide binding	molecular_function	7	0.0153941	ENSRNOG00000010440	Gnal	G protein subunit alpha L [Source:RGD Symbol;Acc:2715]	1.49662	1.64004	1.25106	3.39378	2.09239	3.64563	0.480487	-1.05743	down
GO:0015108	chloride transmembrane transporter activity	molecular_function	8	0.0153941	ENSRNOG00000055103	Cftr	cystic fibrosis transmembrane conductance regulator [Source:RGD Symbol;Acc:2332]	1.14851	0.941143	0.718715	2.41175	2.46834	1.29678	0.454659	-1.13714	down
GO:0015108	chloride transmembrane transporter activity	molecular_function	8	0.0153941	ENSRNOG00000058692	Slc26a4	solute carrier family 26 member 4 [Source:RGD Symbol;Acc:3293]	2.67212	1.9953	1.15691	1.03707	0.715431	0.934049	2.16796	1.11634	up
GO:0006508	proteolysis	biological_process	7	0.0157015	ENSRNOG00000004725	Cela1	chymotrypsin like elastase 1 [Source:RGD Symbol;Acc:2547]	25.6612	19.6849	15.4892	7.22067	12.5953	7.85221	2.19875	1.13668	up
GO:0006508	proteolysis	biological_process	7	0.0157015	ENSRNOG00000008947	Cpz	carboxypeptidase Z [Source:RGD Symbol;Acc:620496]	3.96244	4.46341	5.17347	7.58641	9.99263	9.74149	0.497769	-1.00645	down
GO:0006508	proteolysis	biological_process	7	0.0157015	ENSRNOG00000009172	Cpvl	carboxypeptidase, vitellogenic-like [Source:RGD Symbol;Acc:1563609]	0.429546	0.839735	0.861303	1.33746	1.63038	2.02442	0.426778	-1.22844	down
GO:0006508	proteolysis	biological_process	7	0.0157015	ENSRNOG00000010603	Gzma	granzyme A [Source:RGD Symbol;Acc:628640]	37.3725	72.5884	41.9582	18.3746	12.8989	25.6912	2.6669	1.41516	up
GO:0006508	proteolysis	biological_process	7	0.0157015	ENSRNOG00000010935	Cpb2	carboxypeptidase B2 [Source:RGD Symbol;Acc:71035]	0.244928	0.291876	0.095584	0	0	0	2107.96	11.0416	up
GO:0006508	proteolysis	biological_process	7	0.0157015	ENSRNOG00000016695	Mmp2	matrix metallopeptidase 2 [Source:RGD Symbol;Acc:621316]	30.7938	26.2646	32.2348	67.5082	55.093	74.8328	0.452269	-1.14475	down
GO:0006508	proteolysis	biological_process	7	0.0157015	ENSRNOG00000018865	Adamts12	ADAM metallopeptidase with thrombospondin type 1 motif, 12 [Source:RGD Symbol;Acc:1307323]	1.22778	1.39158	1.85944	4.25796	2.71078	3.8658	0.413382	-1.27445	down
GO:0006508	proteolysis	biological_process	7	0.0157015	ENSRNOG00000019921	Rhbdl1	rhomboid like 1 [Source:RGD Symbol;Acc:620699]	1.56641	1.24922	0.921898	2.1812	3.31834	2.41805	0.472054	-1.08298	down
GO:0006508	proteolysis	biological_process	7	0.0157015	ENSRNOG00000025184	Prss35	serine protease 35 [Source:RGD Symbol;Acc:1311282]	0.174634	0.396188	0.403432	0.944076	0.739136	0.923656	0.373726	-1.41995	down
GO:0006508	proteolysis	biological_process	7	0.0157015	ENSRNOG00000037080	Adamts17	ADAM metallopeptidase with thrombospondin type 1 motif, 17 [Source:RGD Symbol;Acc:1308783]	0.97741	1.04513	1.43016	3.83248	2.55941	2.78039	0.376428	-1.40956	down
GO:0006508	proteolysis	biological_process	7	0.0157015	ENSRNOG00000046301	Gzmbl3	Granzyme B-like 3 [Source:RGD Symbol;Acc:2320502]	9.5866	12.0134	9.17037	1.23861	0.386529	2.4398	7.56969	2.92023	up
GO:0006508	proteolysis	biological_process	7	0.0157015	ENSRNOG00000049919	LOC691670	similar to natural killer cell protease 7 [Source:RGD Symbol;Acc:1597224]	0.825562	1.04608	0.608183	0	0.175413	0.15399	7.52826	2.91232	up
GO:0006508	proteolysis	biological_process	7	0.0157015	ENSRNOG00000050198	Gzmbl1	Granszyme B-like 1 [Source:RGD Symbol;Acc:1561819]	1.6177	4.11414	2.13787	0.277909	0.052331	0.237429	13.8632	3.79319	up
GO:0006910	phagocytosis, recognition	biological_process	5	0.0163496	ENSRNOG00000030332	Ighg1	immunoglobulin heavy constant gamma 1 [Source:RGD Symbol;Acc:1359539]	5.53172	6.5237	33.722	1.9498	0.877678	2.30912	8.91201	3.15575	up
GO:0006910	phagocytosis, recognition	biological_process	5	0.0163496	ENSRNOG00000042319	AABR07065814		6.68222	8.72294	9.77249	5.32954	2.55509	3.63014	2.18655	1.12866	up
GO:0006910	phagocytosis, recognition	biological_process	5	0.0163496	ENSRNOG00000042569	AABR07065811		9.52239	7.43076	3.45214	1.05548	0.953026	2.96165	4.10556	2.03758	up
GO:0006910	phagocytosis, recognition	biological_process	5	0.0163496	ENSRNOG00000048159	AABR07065778		6.58067	1.09822	4.45755	0.512362	0.399594	1.25736	5.5946	2.48403	up
GO:0008233	peptidase activity	molecular_function	5	0.0164676	ENSRNOG00000004725	Cela1	chymotrypsin like elastase 1 [Source:RGD Symbol;Acc:2547]	25.6612	19.6849	15.4892	7.22067	12.5953	7.85221	2.19875	1.13668	up
GO:0008233	peptidase activity	molecular_function	5	0.0164676	ENSRNOG00000009172	Cpvl	carboxypeptidase, vitellogenic-like [Source:RGD Symbol;Acc:1563609]	0.429546	0.839735	0.861303	1.33746	1.63038	2.02442	0.426778	-1.22844	down
GO:0008233	peptidase activity	molecular_function	5	0.0164676	ENSRNOG00000010603	Gzma	granzyme A [Source:RGD Symbol;Acc:628640]	37.3725	72.5884	41.9582	18.3746	12.8989	25.6912	2.6669	1.41516	up
GO:0008233	peptidase activity	molecular_function	5	0.0164676	ENSRNOG00000010935	Cpb2	carboxypeptidase B2 [Source:RGD Symbol;Acc:71035]	0.244928	0.291876	0.095584	0	0	0	2107.96	11.0416	up
GO:0008233	peptidase activity	molecular_function	5	0.0164676	ENSRNOG00000016695	Mmp2	matrix metallopeptidase 2 [Source:RGD Symbol;Acc:621316]	30.7938	26.2646	32.2348	67.5082	55.093	74.8328	0.452269	-1.14475	down
GO:0008233	peptidase activity	molecular_function	5	0.0164676	ENSRNOG00000018865	Adamts12	ADAM metallopeptidase with thrombospondin type 1 motif, 12 [Source:RGD Symbol;Acc:1307323]	1.22778	1.39158	1.85944	4.25796	2.71078	3.8658	0.413382	-1.27445	down
GO:0008233	peptidase activity	molecular_function	5	0.0164676	ENSRNOG00000037080	Adamts17	ADAM metallopeptidase with thrombospondin type 1 motif, 17 [Source:RGD Symbol;Acc:1308783]	0.97741	1.04513	1.43016	3.83248	2.55941	2.78039	0.376428	-1.40956	down
GO:0008233	peptidase activity	molecular_function	5	0.0164676	ENSRNOG00000046301	Gzmbl3	Granzyme B-like 3 [Source:RGD Symbol;Acc:2320502]	9.5866	12.0134	9.17037	1.23861	0.386529	2.4398	7.56969	2.92023	up
GO:0008233	peptidase activity	molecular_function	5	0.0164676	ENSRNOG00000049919	LOC691670	similar to natural killer cell protease 7 [Source:RGD Symbol;Acc:1597224]	0.825562	1.04608	0.608183	0	0.175413	0.15399	7.52826	2.91232	up
GO:0008233	peptidase activity	molecular_function	5	0.0164676	ENSRNOG00000050198	Gzmbl1	Granszyme B-like 1 [Source:RGD Symbol;Acc:1561819]	1.6177	4.11414	2.13787	0.277909	0.052331	0.237429	13.8632	3.79319	up
GO:0001756	somitogenesis	biological_process	7	0.0166982	ENSRNOG00000010685	Tbx18	T-box18 [Source:RGD Symbol;Acc:1309856]	1.6001	1.18753	1.20867	0.443902	0.506117	0.376577	3.01245	1.59094	up
GO:0001756	somitogenesis	biological_process	7	0.0166982	ENSRNOG00000015618	Wnt5a	Wnt family member 5A [Source:RGD Symbol;Acc:69250]	3.0348	2.5955	2.2052	6.68335	4.54321	6.14645	0.451016	-1.14875	down
GO:0001756	somitogenesis	biological_process	7	0.0166982	ENSRNOG00000053232	Ror2	receptor tyrosine kinase-like orphan receptor 2 [Source:RGD Symbol;Acc:1305275]	0.93753	0.843785	1.20048	2.20838	2.23265	2.21271	0.448138	-1.15799	down
GO:0090263	positive regulation of canonical Wnt signaling pathway	biological_process	10	0.0170309	ENSRNOG00000003897	Col1a1	collagen type I alpha 1 chain [Source:RGD Symbol;Acc:61817]	21.9343	20.0594	21.0288	58.1167	63.4283	51.677	0.363825	-1.45869	down
GO:0090263	positive regulation of canonical Wnt signaling pathway	biological_process	10	0.0170309	ENSRNOG00000014448	Arntl	aryl hydrocarbon receptor nuclear translocator-like [Source:RGD Symbol;Acc:62003]	12.2717	9.27036	6.63534	7.09622	2.94619	3.24836	2.12007	1.08411	up
GO:0090263	positive regulation of canonical Wnt signaling pathway	biological_process	10	0.0170309	ENSRNOG00000016684	Wnk2	WNK lysine deficient protein kinase 2 [Source:RGD Symbol;Acc:1307284]	2.24948	2.78267	2.93501	1.49678	1.02756	1.17308	2.15479	1.10755	up
GO:0090263	positive regulation of canonical Wnt signaling pathway	biological_process	10	0.0170309	ENSRNOG00000053232	Ror2	receptor tyrosine kinase-like orphan receptor 2 [Source:RGD Symbol;Acc:1305275]	0.93753	0.843785	1.20048	2.20838	2.23265	2.21271	0.448138	-1.15799	down
GO:0035567	non-canonical Wnt signaling pathway	biological_process	8	0.0173103	ENSRNOG00000007765	Frzb	frizzled-related protein [Source:RGD Symbol;Acc:1311315]	0.835247	1.32762	1.13202	2.30154	1.72858	2.68979	0.490317	-1.02821	down
GO:0035567	non-canonical Wnt signaling pathway	biological_process	8	0.0173103	ENSRNOG00000015618	Wnt5a	Wnt family member 5A [Source:RGD Symbol;Acc:69250]	3.0348	2.5955	2.2052	6.68335	4.54321	6.14645	0.451016	-1.14875	down
GO:0043122	regulation of I-kappaB kinase/NF-kappaB signaling	biological_process	9	0.0173103	ENSRNOG00000004649	Il1b	interleukin 1 beta [Source:RGD Symbol;Acc:2891]	20.4545	17.8629	26.638	9.01274	9.02768	13.4852	2.0604	1.04293	up
GO:0043122	regulation of I-kappaB kinase/NF-kappaB signaling	biological_process	9	0.0173103	ENSRNOG00000015618	Wnt5a	Wnt family member 5A [Source:RGD Symbol;Acc:69250]	3.0348	2.5955	2.2052	6.68335	4.54321	6.14645	0.451016	-1.14875	down
GO:0007169	transmembrane receptor protein tyrosine kinase signaling pathway	biological_process	7	0.0184461	ENSRNOG00000007865	Ephb1	Eph receptor B1 [Source:RGD Symbol;Acc:2556]	0.836464	0.793073	1.14742	0.471882	0.398737	0.218471	2.5498	1.35038	up
GO:0007169	transmembrane receptor protein tyrosine kinase signaling pathway	biological_process	7	0.0184461	ENSRNOG00000014248	Erbb4	erb-b2 receptor tyrosine kinase 4 [Source:RGD Symbol;Acc:620486]	0.602772	0.820792	0.860173	0.247666	0.295959	0.240493	2.91249	1.54225	up
GO:0007169	transmembrane receptor protein tyrosine kinase signaling pathway	biological_process	7	0.0184461	ENSRNOG00000051169	Clnk	cytokine-dependent hematopoietic cell linker [Source:RGD Symbol;Acc:1562417]	2.63507	7.08413	3.45371	1.51226	0.862768	2.10793	2.93844	1.55505	up
GO:0007169	transmembrane receptor protein tyrosine kinase signaling pathway	biological_process	7	0.0184461	ENSRNOG00000053232	Ror2	receptor tyrosine kinase-like orphan receptor 2 [Source:RGD Symbol;Acc:1305275]	0.93753	0.843785	1.20048	2.20838	2.23265	2.21271	0.448138	-1.15799	down
GO:0042060	wound healing	biological_process	6	0.0191803	ENSRNOG00000002792	Cxcl2	C-X-C motif chemokine ligand 2 [Source:RGD Symbol;Acc:70069]	2.49155	1.56141	2.22508	0.21844	0.639161	0.597588	4.31425	2.10911	up
GO:0042060	wound healing	biological_process	6	0.0191803	ENSRNOG00000003357	Col3a1	collagen type III alpha 1 chain [Source:RGD Symbol;Acc:71029]	156.474	148.568	159.465	332.712	580.742	362.723	0.363983	-1.45806	down
GO:0042060	wound healing	biological_process	6	0.0191803	ENSRNOG00000003897	Col1a1	collagen type I alpha 1 chain [Source:RGD Symbol;Acc:61817]	21.9343	20.0594	21.0288	58.1167	63.4283	51.677	0.363825	-1.45869	down
GO:0042060	wound healing	biological_process	6	0.0191803	ENSRNOG00000015618	Wnt5a	Wnt family member 5A [Source:RGD Symbol;Acc:69250]	3.0348	2.5955	2.2052	6.68335	4.54321	6.14645	0.451016	-1.14875	down
GO:0043410	positive regulation of MAPK cascade	biological_process	11	0.0191803	ENSRNOG00000012674	Adrb3	adrenoceptor beta 3 [Source:RGD Symbol;Acc:2061]	0	0	0	0.089852	0.041841	1.01731	0.000261096	-11.9031	down
GO:0043410	positive regulation of MAPK cascade	biological_process	11	0.0191803	ENSRNOG00000013887	Adra2b	adrenoceptor alpha 2B [Source:RGD Symbol;Acc:2057]	0.311704	0.246273	0.182689	0.886988	0.676955	1.17461	0.270458	-1.88652	down
GO:0043410	positive regulation of MAPK cascade	biological_process	11	0.0191803	ENSRNOG00000045797	Lep	leptin [Source:RGD Symbol;Acc:3000]	0.038354	0.031345	0.037116	0.113483	0.270256	1.22499	0.0663972	-3.91273	down
GO:0043410	positive regulation of MAPK cascade	biological_process	11	0.0191803	ENSRNOG00000053232	Ror2	receptor tyrosine kinase-like orphan receptor 2 [Source:RGD Symbol;Acc:1305275]	0.93753	0.843785	1.20048	2.20838	2.23265	2.21271	0.448138	-1.15799	down
GO:0046328	regulation of JNK cascade	biological_process	12	0.019322	ENSRNOG00000007865	Ephb1	Eph receptor B1 [Source:RGD Symbol;Acc:2556]	0.836464	0.793073	1.14742	0.471882	0.398737	0.218471	2.5498	1.35038	up
GO:0046328	regulation of JNK cascade	biological_process	12	0.019322	ENSRNOG00000032828	Mapk8ip2	mitogen-activated protein kinase 8 interacting protein 2 [Source:RGD Symbol;Acc:1309727]	0	0.011052	0	0.164696	0.033483	0.104562	0.0365065	-4.7757	down
GO:0033198	response to ATP	biological_process	8	0.019322	ENSRNOG00000004649	Il1b	interleukin 1 beta [Source:RGD Symbol;Acc:2891]	20.4545	17.8629	26.638	9.01274	9.02768	13.4852	2.0604	1.04293	up
GO:0033198	response to ATP	biological_process	8	0.019322	ENSRNOG00000016070	Trpc3	transient receptor potential cation channel, subfamily C, member 3 [Source:RGD Symbol;Acc:61973]	0.998502	0.698946	0.823061	2.01864	2.08611	2.63759	0.373833	-1.41954	down
GO:0005216	ion channel activity	molecular_function	6	0.0196243	ENSRNOG00000011133	Trpc4	transient receptor potential cation channel, subfamily C, member 4 [Source:RGD Symbol;Acc:621276]	0.047885	0.130389	0.050748	0.258961	0.381343	0.332957	0.235314	-2.08734	down
GO:0005216	ion channel activity	molecular_function	6	0.0196243	ENSRNOG00000016070	Trpc3	transient receptor potential cation channel, subfamily C, member 3 [Source:RGD Symbol;Acc:61973]	0.998502	0.698946	0.823061	2.01864	2.08611	2.63759	0.373833	-1.41954	down
GO:0005216	ion channel activity	molecular_function	6	0.0196243	ENSRNOG00000020484	Trpm5	transient receptor potential cation channel, subfamily M, member 5 [Source:RGD Symbol;Acc:1310620]	5.99927	5.86911	10.0597	17.4263	11.9153	18.1559	0.461669	-1.11507	down
GO:0005216	ion channel activity	molecular_function	6	0.0196243	ENSRNOG00000029342	Scn7a	sodium voltage-gated channel alpha subunit 7 [Source:RGD Symbol;Acc:61922]	11.5574	9.24312	13.5523	34.1139	29.6192	24.4067	0.389754	-1.35936	down
GO:0005216	ion channel activity	molecular_function	6	0.0196243	ENSRNOG00000032417	Gabrp	gamma-aminobutyric acid type A receptor pi subunit [Source:RGD Symbol;Acc:620532]	0.092348	0.19525	0.36241	0.951681	0.704935	1.06596	0.238747	-2.06644	down
GO:0005216	ion channel activity	molecular_function	6	0.0196243	ENSRNOG00000052486	Kcna6	potassium voltage-gated channel subfamily A member 6 [Source:RGD Symbol;Acc:62083]	0.206521	0.495587	0.476457	0.150545	0.128976	0.104822	3.06644	1.61657	up
GO:0006958	complement activation, classical pathway	biological_process	6	0.0199323	ENSRNOG00000030332	Ighg1	immunoglobulin heavy constant gamma 1 [Source:RGD Symbol;Acc:1359539]	5.53172	6.5237	33.722	1.9498	0.877678	2.30912	8.91201	3.15575	up
GO:0006958	complement activation, classical pathway	biological_process	6	0.0199323	ENSRNOG00000042319	AABR07065814		6.68222	8.72294	9.77249	5.32954	2.55509	3.63014	2.18655	1.12866	up
GO:0006958	complement activation, classical pathway	biological_process	6	0.0199323	ENSRNOG00000042569	AABR07065811		9.52239	7.43076	3.45214	1.05548	0.953026	2.96165	4.10556	2.03758	up
GO:0006958	complement activation, classical pathway	biological_process	6	0.0199323	ENSRNOG00000048159	AABR07065778		6.58067	1.09822	4.45755	0.512362	0.399594	1.25736	5.5946	2.48403	up
GO:0007519	skeletal muscle tissue development	biological_process	8	0.02094	ENSRNOG00000001469	Eln	elastin [Source:RGD Symbol;Acc:67394]	73.1078	65.5134	68.0227	159.291	311.13	177.739	0.318816	-1.6492	down
GO:0007519	skeletal muscle tissue development	biological_process	8	0.02094	ENSRNOG00000004537	Rxrg	retinoid X receptor gamma [Source:RGD Symbol;Acc:620046]	1.28978	1.42628	2.23642	3.66221	2.84174	4.15561	0.464605	-1.10592	down
GO:0007519	skeletal muscle tissue development	biological_process	8	0.02094	ENSRNOG00000056697	Kcnab1	potassium voltage-gated channel subfamily A member regulatory beta subunit 1 [Source:RGD Symbol;Acc:61827]	3.31095	2.45264	1.755	1.07741	1.03743	1.28351	2.21242	1.14563	up
GO:0051260	protein homooligomerization	biological_process	8	0.0211267	ENSRNOG00000001821	Adipoq	adiponectin, C1Q and collagen domain containing [Source:RGD Symbol;Acc:628748]	0.269142	0.528074	0.422021	2.31808	1.93395	13.321	0.0693811	-3.84931	down
GO:0051260	protein homooligomerization	biological_process	8	0.0211267	ENSRNOG00000002364	Rnf112	ring finger protein 112 [Source:RGD Symbol;Acc:3986]	0.268859	0.283787	0.444264	0.501704	1.23498	0.948211	0.371303	-1.42933	down
GO:0051260	protein homooligomerization	biological_process	8	0.0211267	ENSRNOG00000010617	Scube1	signal peptide, CUB domain and EGF like domain containing 1 [Source:RGD Symbol;Acc:1309015]	1.45564	1.53436	2.27365	3.64137	2.98263	4.25135	0.483999	-1.04692	down
GO:0051260	protein homooligomerization	biological_process	8	0.0211267	ENSRNOG00000013736	C9	complement C9 [Source:RGD Symbol;Acc:620319]	0.095381	0.17503	0.090134	1.08752	0.317408	0.991207	0.150469	-2.73246	down
GO:0051260	protein homooligomerization	biological_process	8	0.0211267	ENSRNOG00000052486	Kcna6	potassium voltage-gated channel subfamily A member 6 [Source:RGD Symbol;Acc:62083]	0.206521	0.495587	0.476457	0.150545	0.128976	0.104822	3.06644	1.61657	up
GO:0051260	protein homooligomerization	biological_process	8	0.0211267	ENSRNOG00000053804	Prmt8	protein arginine methyltransferase 8 [Source:RGD Symbol;Acc:1587677]	0.332504	0.569915	0.192181	0.028857	0	0.008121	29.6014	4.88759	up
GO:0032148	activation of protein kinase B activity	biological_process	13	0.0214266	ENSRNOG00000013887	Adra2b	adrenoceptor alpha 2B [Source:RGD Symbol;Acc:2057]	0.311704	0.246273	0.182689	0.886988	0.676955	1.17461	0.270458	-1.88652	down
GO:0032148	activation of protein kinase B activity	biological_process	13	0.0214266	ENSRNOG00000015618	Wnt5a	Wnt family member 5A [Source:RGD Symbol;Acc:69250]	3.0348	2.5955	2.2052	6.68335	4.54321	6.14645	0.451016	-1.14875	down
GO:0015701	bicarbonate transport	biological_process	9	0.0214266	ENSRNOG00000055103	Cftr	cystic fibrosis transmembrane conductance regulator [Source:RGD Symbol;Acc:2332]	1.14851	0.941143	0.718715	2.41175	2.46834	1.29678	0.454659	-1.13714	down
GO:0015701	bicarbonate transport	biological_process	9	0.0214266	ENSRNOG00000058692	Slc26a4	solute carrier family 26 member 4 [Source:RGD Symbol;Acc:3293]	2.67212	1.9953	1.15691	1.03707	0.715431	0.934049	2.16796	1.11634	up
GO:0030318	melanocyte differentiation	biological_process	7	0.0214266	ENSRNOG00000014465	Oca2	OCA2 melanosomal transmembrane protein [Source:RGD Symbol;Acc:2318412]	0	0	0	0.101048	0.120925	0.079096	0.000996449	-9.97092	down
GO:0030318	melanocyte differentiation	biological_process	7	0.0214266	ENSRNOG00000015774	Mreg	melanoregulin [Source:RGD Symbol;Acc:1562333]	0.826137	1.91827	1.79114	0.453484	0.431069	0.6671	2.92304	1.54747	up
GO:0032757	positive regulation of interleukin-8 production	biological_process	8	0.0214266	ENSRNOG00000001821	Adipoq	adiponectin, C1Q and collagen domain containing [Source:RGD Symbol;Acc:628748]	0.269142	0.528074	0.422021	2.31808	1.93395	13.321	0.0693811	-3.84931	down
GO:0032757	positive regulation of interleukin-8 production	biological_process	8	0.0214266	ENSRNOG00000004649	Il1b	interleukin 1 beta [Source:RGD Symbol;Acc:2891]	20.4545	17.8629	26.638	9.01274	9.02768	13.4852	2.0604	1.04293	up
GO:0006911	phagocytosis, engulfment	biological_process	8	0.0214903	ENSRNOG00000030332	Ighg1	immunoglobulin heavy constant gamma 1 [Source:RGD Symbol;Acc:1359539]	5.53172	6.5237	33.722	1.9498	0.877678	2.30912	8.91201	3.15575	up
GO:0006911	phagocytosis, engulfment	biological_process	8	0.0214903	ENSRNOG00000042319	AABR07065814		6.68222	8.72294	9.77249	5.32954	2.55509	3.63014	2.18655	1.12866	up
GO:0006911	phagocytosis, engulfment	biological_process	8	0.0214903	ENSRNOG00000042569	AABR07065811		9.52239	7.43076	3.45214	1.05548	0.953026	2.96165	4.10556	2.03758	up
GO:0006911	phagocytosis, engulfment	biological_process	8	0.0214903	ENSRNOG00000048159	AABR07065778		6.58067	1.09822	4.45755	0.512362	0.399594	1.25736	5.5946	2.48403	up
GO:0097421	liver regeneration	biological_process	8	0.0220842	ENSRNOG00000010935	Cpb2	carboxypeptidase B2 [Source:RGD Symbol;Acc:71035]	0.244928	0.291876	0.095584	0	0	0	2107.96	11.0416	up
GO:0097421	liver regeneration	biological_process	8	0.0220842	ENSRNOG00000025120	Gli1	GLI family zinc finger 1 [Source:RGD Symbol;Acc:621673]	0.698325	0.477126	0.544131	1.56395	1.68971	1.52278	0.360013	-1.47388	down
GO:0097421	liver regeneration	biological_process	8	0.0220842	ENSRNOG00000050761	LOC100909524	serpin family A member 10 [Source:RGD Symbol;Acc:621220]	1.58588	1.13828	1.39171	0.39867	0.565611	0.809024	2.32102	1.21476	up
GO:0008236	serine-type peptidase activity	molecular_function	6	0.0234804	ENSRNOG00000004725	Cela1	chymotrypsin like elastase 1 [Source:RGD Symbol;Acc:2547]	25.6612	19.6849	15.4892	7.22067	12.5953	7.85221	2.19875	1.13668	up
GO:0008236	serine-type peptidase activity	molecular_function	6	0.0234804	ENSRNOG00000010603	Gzma	granzyme A [Source:RGD Symbol;Acc:628640]	37.3725	72.5884	41.9582	18.3746	12.8989	25.6912	2.6669	1.41516	up
GO:0008236	serine-type peptidase activity	molecular_function	6	0.0234804	ENSRNOG00000046301	Gzmbl3	Granzyme B-like 3 [Source:RGD Symbol;Acc:2320502]	9.5866	12.0134	9.17037	1.23861	0.386529	2.4398	7.56969	2.92023	up
GO:0008236	serine-type peptidase activity	molecular_function	6	0.0234804	ENSRNOG00000049919	LOC691670	similar to natural killer cell protease 7 [Source:RGD Symbol;Acc:1597224]	0.825562	1.04608	0.608183	0	0.175413	0.15399	7.52826	2.91232	up
GO:0008236	serine-type peptidase activity	molecular_function	6	0.0234804	ENSRNOG00000050198	Gzmbl1	Granszyme B-like 1 [Source:RGD Symbol;Acc:1561819]	1.6177	4.11414	2.13787	0.277909	0.052331	0.237429	13.8632	3.79319	up
GO:0045471	response to ethanol	biological_process	6	0.0234804	ENSRNOG00000001821	Adipoq	adiponectin, C1Q and collagen domain containing [Source:RGD Symbol;Acc:628748]	0.269142	0.528074	0.422021	2.31808	1.93395	13.321	0.0693811	-3.84931	down
GO:0045471	response to ethanol	biological_process	6	0.0234804	ENSRNOG00000008943	Penk	proenkephalin [Source:RGD Symbol;Acc:68946]	1.132	1.55783	3.43566	0.621514	0.959967	0.863637	2.50519	1.32492	up
GO:0045471	response to ethanol	biological_process	6	0.0234804	ENSRNOG00000010079	Ca3	carbonic anhydrase 3 [Source:RGD Symbol;Acc:2241]	2.52678	4.82757	3.94699	10.1675	12.1564	43.507	0.171672	-2.54227	down
GO:0045471	response to ethanol	biological_process	6	0.0234804	ENSRNOG00000017226	Slc2a4	solute carrier family 2 member 4 [Source:RGD Symbol;Acc:2711]	0.725115	0.747971	0.866538	1.38289	1.35574	3.8632	0.35439	-1.49659	down
GO:0045471	response to ethanol	biological_process	6	0.0234804	ENSRNOG00000045797	Lep	leptin [Source:RGD Symbol;Acc:3000]	0.038354	0.031345	0.037116	0.113483	0.270256	1.22499	0.0663972	-3.91273	down
GO:0006885	regulation of pH	biological_process	10	0.0236218	ENSRNOG00000009565	Pdk4	pyruvate dehydrogenase kinase 4 [Source:RGD Symbol;Acc:69061]	4.36221	3.78789	4.40906	9.63669	7.51304	17.2593	0.364996	-1.45405	down
GO:0006885	regulation of pH	biological_process	10	0.0236218	ENSRNOG00000058692	Slc26a4	solute carrier family 26 member 4 [Source:RGD Symbol;Acc:3293]	2.67212	1.9953	1.15691	1.03707	0.715431	0.934049	2.16796	1.11634	up
GO:0046427	positive regulation of receptor signaling pathway via JAK-STAT	biological_process	10	0.0236218	ENSRNOG00000014248	Erbb4	erb-b2 receptor tyrosine kinase 4 [Source:RGD Symbol;Acc:620486]	0.602772	0.820792	0.860173	0.247666	0.295959	0.240493	2.91249	1.54225	up
GO:0046427	positive regulation of receptor signaling pathway via JAK-STAT	biological_process	10	0.0236218	ENSRNOG00000045797	Lep	leptin [Source:RGD Symbol;Acc:3000]	0.038354	0.031345	0.037116	0.113483	0.270256	1.22499	0.0663972	-3.91273	down
GO:0010906	regulation of glucose metabolic process	biological_process	9	0.0236218	ENSRNOG00000001821	Adipoq	adiponectin, C1Q and collagen domain containing [Source:RGD Symbol;Acc:628748]	0.269142	0.528074	0.422021	2.31808	1.93395	13.321	0.0693811	-3.84931	down
GO:0010906	regulation of glucose metabolic process	biological_process	9	0.0236218	ENSRNOG00000009565	Pdk4	pyruvate dehydrogenase kinase 4 [Source:RGD Symbol;Acc:69061]	4.36221	3.78789	4.40906	9.63669	7.51304	17.2593	0.364996	-1.45405	down
GO:0055093	response to hyperoxia	biological_process	5	0.0236218	ENSRNOG00000003897	Col1a1	collagen type I alpha 1 chain [Source:RGD Symbol;Acc:61817]	21.9343	20.0594	21.0288	58.1167	63.4283	51.677	0.363825	-1.45869	down
GO:0055093	response to hyperoxia	biological_process	5	0.0236218	ENSRNOG00000019500	Cyp1a1	cytochrome P450, family 1, subfamily a, polypeptide 1 [Source:RGD Symbol;Acc:2458]	1.30617	2.01733	6.01601	22.1476	22.9681	33.3498	0.119027	-3.07064	down
GO:0031683	G-protein beta/gamma-subunit complex binding	molecular_function	5	0.0236218	ENSRNOG00000005268	Gnat3	G protein subunit alpha transducin 3 [Source:RGD Symbol;Acc:727817]	1.06101	0.850564	1.51812	3.70113	2.49755	4.15072	0.331391	-1.5934	down
GO:0031683	G-protein beta/gamma-subunit complex binding	molecular_function	5	0.0236218	ENSRNOG00000010440	Gnal	G protein subunit alpha L [Source:RGD Symbol;Acc:2715]	1.49662	1.64004	1.25106	3.39378	2.09239	3.64563	0.480487	-1.05743	down
GO:0002933	lipid hydroxylation	biological_process	8	0.0238532	ENSRNOG00000019500	Cyp1a1	cytochrome P450, family 1, subfamily a, polypeptide 1 [Source:RGD Symbol;Acc:2458]	1.30617	2.01733	6.01601	22.1476	22.9681	33.3498	0.119027	-3.07064	down
GO:0030538	embryonic genitalia morphogenesis	biological_process	6	0.0238532	ENSRNOG00000053232	Ror2	receptor tyrosine kinase-like orphan receptor 2 [Source:RGD Symbol;Acc:1305275]	0.93753	0.843785	1.20048	2.20838	2.23265	2.21271	0.448138	-1.15799	down
GO:0017143	insecticide metabolic process	biological_process	6	0.0238532	ENSRNOG00000019500	Cyp1a1	cytochrome P450, family 1, subfamily a, polypeptide 1 [Source:RGD Symbol;Acc:2458]	1.30617	2.01733	6.01601	22.1476	22.9681	33.3498	0.119027	-3.07064	down
GO:0002264	endothelial cell activation involved in immune response	biological_process	6	0.0238532	ENSRNOG00000049811	LOC684871	similar to Protein C8orf4 (Thyroid cancer protein 1) (TC-1) [Source:RGD Symbol;Acc:1585525]	41.2351	32.4952	45.9814	68.7484	87.5818	85.5003	0.495024	-1.01443	down
GO:0010721	negative regulation of cell development	biological_process	8	0.0238532	ENSRNOG00000007765	Frzb	frizzled-related protein [Source:RGD Symbol;Acc:1311315]	0.835247	1.32762	1.13202	2.30154	1.72858	2.68979	0.490317	-1.02821	down
GO:0001936	regulation of endothelial cell proliferation	biological_process	8	0.0238532	ENSRNOG00000045797	Lep	leptin [Source:RGD Symbol;Acc:3000]	0.038354	0.031345	0.037116	0.113483	0.270256	1.22499	0.0663972	-3.91273	down
GO:2000594	positive regulation of metanephric DCT cell differentiation	biological_process	8	0.0238532	ENSRNOG00000026203	Pax8	paired box 8 [Source:RGD Symbol;Acc:620434]	0.878829	0.821269	0.820972	0.21796	0.383172	0.130189	3.44728	1.78546	up
GO:1903352	L-ornithine transmembrane transport	biological_process	8	0.0238532	ENSRNOG00000054438	LOC292543	similar to solute carrier family 7 (cationic amino acid transporter, y+ system), member 3 [Source:RGD Symbol;Acc:1565097]	0.528722	0.612372	0.29992	0.047019	0.128095	0.082842	5.58628	2.48189	up
GO:0070965	positive regulation of neutrophil mediated killing of fungus	biological_process	9	0.0238532	ENSRNOG00000013304	Arg1	arginase 1 [Source:RGD Symbol;Acc:2150]	14.1945	11.7175	9.74681	5.09255	6.15658	5.0671	2.18549	1.12795	up
GO:0034485	phosphatidylinositol-3,4,5-trisphosphate 5-phosphatase activity	molecular_function	10	0.0238532	ENSRNOG00000019361	Inpp5j	inositol polyphosphate-5-phosphatase J [Source:RGD Symbol;Acc:620541]	0.506732	0.656187	0.933052	1.64089	1.20865	1.66385	0.46439	-1.10659	down
GO:0051885	positive regulation of timing of anagen	biological_process	10	0.0238532	ENSRNOG00000015618	Wnt5a	Wnt family member 5A [Source:RGD Symbol;Acc:69250]	3.0348	2.5955	2.2052	6.68335	4.54321	6.14645	0.451016	-1.14875	down
GO:2000609	regulation of thyroid hormone generation	biological_process	7	0.0238532	ENSRNOG00000018005	Duoxa1	dual oxidase maturation factor 1 [Source:RGD Symbol;Acc:1306601]	5.56049	2.15936	4.37417	1.58063	1.28771	1.77397	2.60517	1.38138	up
GO:0099638	endosome to plasma membrane protein transport	biological_process	11	0.0238532	ENSRNOG00000022239	Trarg1	trafficking regulator of GLUT4 (SLC2A4) 1 [Source:RGD Symbol;Acc:1307639]	2.12065	2.24179	2.81453	5.40766	4.54121	9.15362	0.375708	-1.41232	down
GO:0051541	elastin metabolic process	biological_process	8	0.0238532	ENSRNOG00000045797	Lep	leptin [Source:RGD Symbol;Acc:3000]	0.038354	0.031345	0.037116	0.113483	0.270256	1.22499	0.0663972	-3.91273	down
GO:0016679	oxidoreductase activity, acting on diphenols and related substances as donors	molecular_function	5	0.0238532	ENSRNOG00000019500	Cyp1a1	cytochrome P450, family 1, subfamily a, polypeptide 1 [Source:RGD Symbol;Acc:2458]	1.30617	2.01733	6.01601	22.1476	22.9681	33.3498	0.119027	-3.07064	down
GO:0101021	estrogen 2-hydroxylase activity	molecular_function	7	0.0238532	ENSRNOG00000019500	Cyp1a1	cytochrome P450, family 1, subfamily a, polypeptide 1 [Source:RGD Symbol;Acc:2458]	1.30617	2.01733	6.01601	22.1476	22.9681	33.3498	0.119027	-3.07064	down
GO:0072385	minus-end-directed organelle transport along microtubule	biological_process	10	0.0238532	ENSRNOG00000015774	Mreg	melanoregulin [Source:RGD Symbol;Acc:1562333]	0.826137	1.91827	1.79114	0.453484	0.431069	0.6671	2.92304	1.54747	up
GO:1903244	positive regulation of cardiac muscle hypertrophy in response to stress	biological_process	11	0.0238532	ENSRNOG00000016070	Trpc3	transient receptor potential cation channel, subfamily C, member 3 [Source:RGD Symbol;Acc:61973]	0.998502	0.698946	0.823061	2.01864	2.08611	2.63759	0.373833	-1.41954	down
GO:0034681	integrin alpha11-beta1 complex	cellular_component	6	0.0238532	ENSRNOG00000006723	Itga11	integrin subunit alpha 11 [Source:RGD Symbol;Acc:1311711]	0.445333	0.566447	0.898136	1.71316	1.51553	1.32386	0.419528	-1.25316	down
GO:1900218	negative regulation of apoptotic process involved in metanephric nephron tubule development	biological_process	10	0.0238532	ENSRNOG00000026203	Pax8	paired box 8 [Source:RGD Symbol;Acc:620434]	0.878829	0.821269	0.820972	0.21796	0.383172	0.130189	3.44728	1.78546	up
GO:0070164	negative regulation of adiponectin secretion	biological_process	9	0.0238532	ENSRNOG00000004649	Il1b	interleukin 1 beta [Source:RGD Symbol;Acc:2891]	20.4545	17.8629	26.638	9.01274	9.02768	13.4852	2.0604	1.04293	up
GO:1900215	negative regulation of apoptotic process involved in metanephric collecting duct development	biological_process	10	0.0238532	ENSRNOG00000026203	Pax8	paired box 8 [Source:RGD Symbol;Acc:620434]	0.878829	0.821269	0.820972	0.21796	0.383172	0.130189	3.44728	1.78546	up
GO:2000552	negative regulation of T-helper 2 cell cytokine production	biological_process	12	0.0238532	ENSRNOG00000013304	Arg1	arginase 1 [Source:RGD Symbol;Acc:2150]	14.1945	11.7175	9.74681	5.09255	6.15658	5.0671	2.18549	1.12795	up
GO:2000611	positive regulation of thyroid hormone generation	biological_process	8	0.0238532	ENSRNOG00000026203	Pax8	paired box 8 [Source:RGD Symbol;Acc:620434]	0.878829	0.821269	0.820972	0.21796	0.383172	0.130189	3.44728	1.78546	up
GO:0009893	positive regulation of metabolic process	biological_process	6	0.0238532	ENSRNOG00000003580	Ucp1	uncoupling protein 1 [Source:RGD Symbol;Acc:3931]	0	0	0	0	0	12.6582	2.37001e-05	-15.3647	down
GO:0004613	phosphoenolpyruvate carboxykinase (GTP) activity	molecular_function	8	0.0238532	ENSRNOG00000028616	Pck1	phosphoenolpyruvate carboxykinase 1 [Source:RGD Symbol;Acc:3267]	0.294123	0.258891	0.731558	1.09133	1.59168	18.8392	0.0596858	-4.06647	down
GO:1903012	positive regulation of bone development	biological_process	7	0.0238532	ENSRNOG00000000700	Tmem119	transmembrane protein 119 [Source:RGD Symbol;Acc:1307573]	6.59079	6.90106	6.28528	11.3215	14.3882	15.1594	0.483913	-1.04718	down
GO:0015855	pyrimidine nucleobase transport	biological_process	8	0.0238532	ENSRNOG00000018853	Slc28a3	solute carrier family 28 member 3 [Source:RGD Symbol;Acc:621224]	3.05653	3.81928	7.36752	12.4951	9.4451	10.0783	0.444846	-1.16862	down
GO:0003401	axis elongation	biological_process	6	0.0238532	ENSRNOG00000015618	Wnt5a	Wnt family member 5A [Source:RGD Symbol;Acc:69250]	3.0348	2.5955	2.2052	6.68335	4.54321	6.14645	0.451016	-1.14875	down
GO:0060309	elastin catabolic process	biological_process	9	0.0238532	ENSRNOG00000004725	Cela1	chymotrypsin like elastase 1 [Source:RGD Symbol;Acc:2547]	25.6612	19.6849	15.4892	7.22067	12.5953	7.85221	2.19875	1.13668	up
GO:0009804	coumarin metabolic process	biological_process	7	0.0238532	ENSRNOG00000019500	Cyp1a1	cytochrome P450, family 1, subfamily a, polypeptide 1 [Source:RGD Symbol;Acc:2458]	1.30617	2.01733	6.01601	22.1476	22.9681	33.3498	0.119027	-3.07064	down
GO:0032615	interleukin-12 production	biological_process	5	0.0238532	ENSRNOG00000045797	Lep	leptin [Source:RGD Symbol;Acc:3000]	0.038354	0.031345	0.037116	0.113483	0.270256	1.22499	0.0663972	-3.91273	down
GO:0030300	regulation of intestinal cholesterol absorption	biological_process	10	0.0238532	ENSRNOG00000045797	Lep	leptin [Source:RGD Symbol;Acc:3000]	0.038354	0.031345	0.037116	0.113483	0.270256	1.22499	0.0663972	-3.91273	down
GO:0004531	deoxyribonuclease II activity	molecular_function	10	0.0238532	ENSRNOG00000016262	Dnase2b	deoxyribonuclease 2 beta [Source:RGD Symbol;Acc:70901]	1.2716	0.756933	1.54207	0.323684	0.137518	0.513763	3.66228	1.87274	up
GO:0036518	chemorepulsion of dopaminergic neuron axon	biological_process	8	0.0238532	ENSRNOG00000015618	Wnt5a	Wnt family member 5A [Source:RGD Symbol;Acc:69250]	3.0348	2.5955	2.2052	6.68335	4.54321	6.14645	0.451016	-1.14875	down
GO:1902943	positive regulation of voltage-gated chloride channel activity	biological_process	10	0.0238532	ENSRNOG00000055103	Cftr	cystic fibrosis transmembrane conductance regulator [Source:RGD Symbol;Acc:2332]	1.14851	0.941143	0.718715	2.41175	2.46834	1.29678	0.454659	-1.13714	down
GO:0004611	phosphoenolpyruvate carboxykinase activity	molecular_function	7	0.0238532	ENSRNOG00000028616	Pck1	phosphoenolpyruvate carboxykinase 1 [Source:RGD Symbol;Acc:3267]	0.294123	0.258891	0.731558	1.09133	1.59168	18.8392	0.0596858	-4.06647	down
GO:0004053	arginase activity	molecular_function	7	0.0238532	ENSRNOG00000013304	Arg1	arginase 1 [Source:RGD Symbol;Acc:2150]	14.1945	11.7175	9.74681	5.09255	6.15658	5.0671	2.18549	1.12795	up
GO:0051586	positive regulation of dopamine uptake involved in synaptic transmission	biological_process	11	0.0238532	ENSRNOG00000008001	Rab3b	RAB3B, member RAS oncogene family [Source:RGD Symbol;Acc:620922]	2.76153	1.88236	3.18417	4.52952	5.74434	6.11997	0.4775	-1.06643	down
GO:0035926	chemokine (C-C motif) ligand 2 secretion	biological_process	13	0.0238532	ENSRNOG00000015089	Mcoln2	mucolipin 2 [Source:RGD Symbol;Acc:1308884]	7.1303	6.82353	5.88089	3.61028	2.8491	3.26985	2.03867	1.02763	up
GO:0061402	positive regulation of transcription from RNA polymerase II promoter in response to acidic pH	biological_process	11	0.0238532	ENSRNOG00000028616	Pck1	phosphoenolpyruvate carboxykinase 1 [Source:RGD Symbol;Acc:3267]	0.294123	0.258891	0.731558	1.09133	1.59168	18.8392	0.0596858	-4.06647	down
GO:0002381	immunoglobulin production involved in immunoglobulin mediated immune response	biological_process	6	0.0238532	ENSRNOG00000026989	Gapt	Grb2-binding adaptor protein, transmembrane [Source:RGD Symbol;Acc:1586621]	0.952751	1.66357	1.71694	0.780461	0.541978	0.649122	2.19788	1.13611	up
GO:0071306	cellular response to vitamin E	biological_process	8	0.0238532	ENSRNOG00000003897	Col1a1	collagen type I alpha 1 chain [Source:RGD Symbol;Acc:61817]	21.9343	20.0594	21.0288	58.1167	63.4283	51.677	0.363825	-1.45869	down
GO:0060638	mesenchymal-epithelial cell signaling	biological_process	6	0.0238532	ENSRNOG00000015618	Wnt5a	Wnt family member 5A [Source:RGD Symbol;Acc:69250]	3.0348	2.5955	2.2052	6.68335	4.54321	6.14645	0.451016	-1.14875	down
GO:0016151	nickel cation binding	molecular_function	8	0.0238532	ENSRNOG00000010079	Ca3	carbonic anhydrase 3 [Source:RGD Symbol;Acc:2241]	2.52678	4.82757	3.94699	10.1675	12.1564	43.507	0.171672	-2.54227	down
GO:0010565	regulation of cellular ketone metabolic process	biological_process	7	0.0238532	ENSRNOG00000009565	Pdk4	pyruvate dehydrogenase kinase 4 [Source:RGD Symbol;Acc:69061]	4.36221	3.78789	4.40906	9.63669	7.51304	17.2593	0.364996	-1.45405	down
GO:0038112	interleukin-8-mediated signaling pathway	biological_process	7	0.0238532	ENSRNOG00000048239	Cxcr1	C-X-C motif chemokine receptor 1 [Source:RGD Symbol;Acc:2905]	16.0266	13.947	11.851	5.02716	3.39089	4.10572	3.33962	1.73968	up
GO:0045715	negative regulation of low-density lipoprotein particle receptor biosynthetic process	biological_process	10	0.0238532	ENSRNOG00000001821	Adipoq	adiponectin, C1Q and collagen domain containing [Source:RGD Symbol;Acc:628748]	0.269142	0.528074	0.422021	2.31808	1.93395	13.321	0.0693811	-3.84931	down
GO:0051354	negative regulation of oxidoreductase activity	biological_process	7	0.0238532	ENSRNOG00000010603	Gzma	granzyme A [Source:RGD Symbol;Acc:628640]	37.3725	72.5884	41.9582	18.3746	12.8989	25.6912	2.6669	1.41516	up
GO:1903597	negative regulation of gap junction assembly	biological_process	9	0.0238532	ENSRNOG00000004649	Il1b	interleukin 1 beta [Source:RGD Symbol;Acc:2891]	20.4545	17.8629	26.638	9.01274	9.02768	13.4852	2.0604	1.04293	up
GO:0021551	central nervous system morphogenesis	biological_process	5	0.0238532	ENSRNOG00000014248	Erbb4	erb-b2 receptor tyrosine kinase 4 [Source:RGD Symbol;Acc:620486]	0.602772	0.820792	0.860173	0.247666	0.295959	0.240493	2.91249	1.54225	up
GO:0072073	kidney epithelium development	biological_process	7	0.0238532	ENSRNOG00000026203	Pax8	paired box 8 [Source:RGD Symbol;Acc:620434]	0.878829	0.821269	0.820972	0.21796	0.383172	0.130189	3.44728	1.78546	up
GO:0015275	stretch-activated, cation-selective, calcium channel activity	molecular_function	9	0.0238532	ENSRNOG00000038066	Fam155b	family with sequence similarity 155, member B [Source:RGD Symbol;Acc:1584125]	1.24283	1.12356	1.14399	0.650261	0.318461	0.399032	2.56653	1.35982	up
GO:0004918	interleukin-8 receptor activity	molecular_function	10	0.0238532	ENSRNOG00000048239	Cxcr1	C-X-C motif chemokine receptor 1 [Source:RGD Symbol;Acc:2905]	16.0266	13.947	11.851	5.02716	3.39089	4.10572	3.33962	1.73968	up
GO:0023030	MHC class Ib protein binding, via antigen binding groove	molecular_function	8	0.0238532	ENSRNOG00000060246	Klrd1	killer cell lectin like receptor D1 [Source:RGD Symbol;Acc:2978]	13.655	21.5233	11.2525	7.56228	4.74204	9.73844	2.1064	1.07478	up
GO:0071642	positive regulation of macrophage inflammatory protein 1 alpha production	biological_process	9	0.0238532	ENSRNOG00000015089	Mcoln2	mucolipin 2 [Source:RGD Symbol;Acc:1308884]	7.1303	6.82353	5.88089	3.61028	2.8491	3.26985	2.03867	1.02763	up
GO:0072305	negative regulation of mesenchymal cell apoptotic process involved in metanephric nephron morphogenesis	biological_process	10	0.0238532	ENSRNOG00000026203	Pax8	paired box 8 [Source:RGD Symbol;Acc:620434]	0.878829	0.821269	0.820972	0.21796	0.383172	0.130189	3.44728	1.78546	up
GO:0001906	cell killing	biological_process	3	0.0238532	ENSRNOG00000013736	C9	complement C9 [Source:RGD Symbol;Acc:620319]	0.095381	0.17503	0.090134	1.08752	0.317408	0.991207	0.150469	-2.73246	down
GO:0060599	lateral sprouting involved in mammary gland duct morphogenesis	biological_process	8	0.0238532	ENSRNOG00000015618	Wnt5a	Wnt family member 5A [Source:RGD Symbol;Acc:69250]	3.0348	2.5955	2.2052	6.68335	4.54321	6.14645	0.451016	-1.14875	down
GO:0035634	response to stilbenoid	biological_process	7	0.0238532	ENSRNOG00000036984	Slco1a1	solute carrier organic anion transporter family, member 1a1 [Source:RGD Symbol;Acc:3700]	0.270199	0.433603	0.341127	0.058162	0.110115	0.019966	5.55096	2.47274	up
GO:0036474	cell death in response to hydrogen peroxide	biological_process	6	0.0238532	ENSRNOG00000002364	Rnf112	ring finger protein 112 [Source:RGD Symbol;Acc:3986]	0.268859	0.283787	0.444264	0.501704	1.23498	0.948211	0.371303	-1.42933	down
GO:0070722	Tle3-Aes complex	cellular_component	7	0.0238532	ENSRNOG00000010685	Tbx18	T-box18 [Source:RGD Symbol;Acc:1309856]	1.6001	1.18753	1.20867	0.443902	0.506117	0.376577	3.01245	1.59094	up
GO:0060809	mesodermal to mesenchymal transition involved in gastrulation	biological_process	8	0.0238532	ENSRNOG00000015618	Wnt5a	Wnt family member 5A [Source:RGD Symbol;Acc:69250]	3.0348	2.5955	2.2052	6.68335	4.54321	6.14645	0.451016	-1.14875	down
GO:0038102	activin receptor antagonist activity	molecular_function	7	0.0238532	ENSRNOG00000011631	Fst	follistatin [Source:RGD Symbol;Acc:2633]	3.03205	2.47665	3.75114	7.03347	7.00825	7.06256	0.438766	-1.18848	down
GO:0031699	beta-3 adrenergic receptor binding	molecular_function	8	0.0238532	ENSRNOG00000012674	Adrb3	adrenoceptor beta 3 [Source:RGD Symbol;Acc:2061]	0	0	0	0.089852	0.041841	1.01731	0.000261096	-11.9031	down
GO:0039003	pronephric field specification	biological_process	7	0.0238532	ENSRNOG00000026203	Pax8	paired box 8 [Source:RGD Symbol;Acc:620434]	0.878829	0.821269	0.820972	0.21796	0.383172	0.130189	3.44728	1.78546	up
GO:0042269	regulation of natural killer cell mediated cytotoxicity	biological_process	7	0.0238532	ENSRNOG00000045797	Lep	leptin [Source:RGD Symbol;Acc:3000]	0.038354	0.031345	0.037116	0.113483	0.270256	1.22499	0.0663972	-3.91273	down
GO:0060026	convergent extension	biological_process	7	0.0238532	ENSRNOG00000015618	Wnt5a	Wnt family member 5A [Source:RGD Symbol;Acc:69250]	3.0348	2.5955	2.2052	6.68335	4.54321	6.14645	0.451016	-1.14875	down
GO:0008459	chondroitin 6-sulfotransferase activity	molecular_function	8	0.0238532	ENSRNOG00000000572	Chst3	carbohydrate sulfotransferase 3 [Source:RGD Symbol;Acc:620355]	1.16179	1.79049	1.49114	6.49275	3.57535	2.86355	0.343608	-1.54116	down
GO:0048022	negative regulation of melanin biosynthetic process	biological_process	9	0.0238532	ENSRNOG00000015618	Wnt5a	Wnt family member 5A [Source:RGD Symbol;Acc:69250]	3.0348	2.5955	2.2052	6.68335	4.54321	6.14645	0.451016	-1.14875	down
GO:0060775	planar cell polarity pathway involved in gastrula mediolateral intercalation	biological_process	10	0.0238532	ENSRNOG00000015618	Wnt5a	Wnt family member 5A [Source:RGD Symbol;Acc:69250]	3.0348	2.5955	2.2052	6.68335	4.54321	6.14645	0.451016	-1.14875	down
GO:0097638	L-arginine import across plasma membrane	biological_process	13	0.0238532	ENSRNOG00000054438	LOC292543	similar to solute carrier family 7 (cationic amino acid transporter, y+ system), member 3 [Source:RGD Symbol;Acc:1565097]	0.528722	0.612372	0.29992	0.047019	0.128095	0.082842	5.58628	2.48189	up
GO:0016813	hydrolase activity, acting on carbon-nitrogen (but not peptide) bonds, in linear amidines	molecular_function	6	0.0238532	ENSRNOG00000013304	Arg1	arginase 1 [Source:RGD Symbol;Acc:2150]	14.1945	11.7175	9.74681	5.09255	6.15658	5.0671	2.18549	1.12795	up
GO:0032814	regulation of natural killer cell activation	biological_process	8	0.0238532	ENSRNOG00000045797	Lep	leptin [Source:RGD Symbol;Acc:3000]	0.038354	0.031345	0.037116	0.113483	0.270256	1.22499	0.0663972	-3.91273	down
GO:0032817	regulation of natural killer cell proliferation	biological_process	9	0.0238532	ENSRNOG00000045797	Lep	leptin [Source:RGD Symbol;Acc:3000]	0.038354	0.031345	0.037116	0.113483	0.270256	1.22499	0.0663972	-3.91273	down
GO:0072531	pyrimidine-containing compound transmembrane transport	biological_process	7	0.0238532	ENSRNOG00000018853	Slc28a3	solute carrier family 28 member 3 [Source:RGD Symbol;Acc:621224]	3.05653	3.81928	7.36752	12.4951	9.4451	10.0783	0.444846	-1.16862	down
GO:0019959	interleukin-8 binding	molecular_function	8	0.0238532	ENSRNOG00000048239	Cxcr1	C-X-C motif chemokine receptor 1 [Source:RGD Symbol;Acc:2905]	16.0266	13.947	11.851	5.02716	3.39089	4.10572	3.33962	1.73968	up
GO:0002588	positive regulation of antigen processing and presentation of peptide antigen via MHC class II	biological_process	9	0.0238532	ENSRNOG00000013578	Trem2	triggering receptor expressed on myeloid cells 2 [Source:RGD Symbol;Acc:1309841]	10.8948	5.01708	5.6079	3.19457	3.44342	4.12088	2.00019	1.00014	up
GO:0042335	cuticle development	biological_process	5	0.0238532	ENSRNOG00000033348	Duox1	dual oxidase 1 [Source:RGD Symbol;Acc:628760]	4.03322	2.15876	3.55853	1.38054	1.11797	1.15612	2.668	1.41576	up
GO:0060067	cervix development	biological_process	6	0.0238532	ENSRNOG00000015618	Wnt5a	Wnt family member 5A [Source:RGD Symbol;Acc:69250]	3.0348	2.5955	2.2052	6.68335	4.54321	6.14645	0.451016	-1.14875	down
GO:0061026	cardiac muscle tissue regeneration	biological_process	7	0.0238532	ENSRNOG00000014248	Erbb4	erb-b2 receptor tyrosine kinase 4 [Source:RGD Symbol;Acc:620486]	0.602772	0.820792	0.860173	0.247666	0.295959	0.240493	2.91249	1.54225	up
GO:0072092	ureteric bud invasion	biological_process	6	0.0238532	ENSRNOG00000028624	Kif26b	kinesin family member 26B [Source:RGD Symbol;Acc:1560022]	0.695709	0.761429	1.28819	2.71739	2.06267	2.08559	0.399863	-1.32242	down
GO:0035377	transepithelial water transport	biological_process	8	0.0238532	ENSRNOG00000055103	Cftr	cystic fibrosis transmembrane conductance regulator [Source:RGD Symbol;Acc:2332]	1.14851	0.941143	0.718715	2.41175	2.46834	1.29678	0.454659	-1.13714	down
GO:0052659	inositol-1,3,4,5-tetrakisphosphate 5-phosphatase activity	molecular_function	10	0.0238532	ENSRNOG00000019361	Inpp5j	inositol polyphosphate-5-phosphatase J [Source:RGD Symbol;Acc:620541]	0.506732	0.656187	0.933052	1.64089	1.20865	1.66385	0.46439	-1.10659	down
GO:1904823	purine nucleobase transmembrane transport	biological_process	9	0.0238532	ENSRNOG00000018853	Slc28a3	solute carrier family 28 member 3 [Source:RGD Symbol;Acc:621224]	3.05653	3.81928	7.36752	12.4951	9.4451	10.0783	0.444846	-1.16862	down
GO:2000584	negative regulation of platelet-derived growth factor receptor-alpha signaling pathway	biological_process	10	0.0238532	ENSRNOG00000001821	Adipoq	adiponectin, C1Q and collagen domain containing [Source:RGD Symbol;Acc:628748]	0.269142	0.528074	0.422021	2.31808	1.93395	13.321	0.0693811	-3.84931	down
GO:0000978	RNA polymerase II proximal promoter sequence-specific DNA binding	molecular_function	10	0.0243707	ENSRNOG00000006200	St18	ST18 C2H2C-type zinc finger transcription factor [Source:RGD Symbol;Acc:708566]	0.0769487	0.146815	0.116223	0.389868	0.323476	0.228701	0.360903	-1.47032	down
GO:0000978	RNA polymerase II proximal promoter sequence-specific DNA binding	molecular_function	10	0.0243707	ENSRNOG00000008834	Dach1	dachshund family transcription factor 1 [Source:RGD Symbol;Acc:1592073]	2.70691	2.93544	4.62768	7.82299	6.27939	6.83599	0.490489	-1.02771	down
GO:0000978	RNA polymerase II proximal promoter sequence-specific DNA binding	molecular_function	10	0.0243707	ENSRNOG00000014448	Arntl	aryl hydrocarbon receptor nuclear translocator-like [Source:RGD Symbol;Acc:62003]	12.2717	9.27036	6.63534	7.09622	2.94619	3.24836	2.12007	1.08411	up
GO:0000978	RNA polymerase II proximal promoter sequence-specific DNA binding	molecular_function	10	0.0243707	ENSRNOG00000015318	Heyl	hes-related family bHLH transcription factor with YRPW motif-like [Source:RGD Symbol;Acc:1305022]	2.94339	2.74707	3.0413	7.51638	10.985	9.78336	0.308709	-1.69568	down
GO:0000978	RNA polymerase II proximal promoter sequence-specific DNA binding	molecular_function	10	0.0243707	ENSRNOG00000017808	Klf15	Kruppel-like factor 15 [Source:RGD Symbol;Acc:70918]	12.6054	16.1892	16.6218	32.3243	28.6913	33.7467	0.479266	-1.0611	down
GO:0000978	RNA polymerase II proximal promoter sequence-specific DNA binding	molecular_function	10	0.0243707	ENSRNOG00000020792	Etv4	ets variant 4 [Source:RGD Symbol;Acc:1306524]	2.80913	2.96286	3.00357	5.37868	7.13604	6.82892	0.453666	-1.1403	down
GO:0000978	RNA polymerase II proximal promoter sequence-specific DNA binding	molecular_function	10	0.0243707	ENSRNOG00000022970	Nkx2-8	NK2 homeobox 8 [Source:RGD Symbol;Acc:1310629]	3.07131	2.63652	1.18154	0.114957	0.539575	0.18753	8.18155	3.03237	up
GO:0000978	RNA polymerase II proximal promoter sequence-specific DNA binding	molecular_function	10	0.0243707	ENSRNOG00000025120	Gli1	GLI family zinc finger 1 [Source:RGD Symbol;Acc:621673]	0.698325	0.477126	0.544131	1.56395	1.68971	1.52278	0.360013	-1.47388	down
GO:0000978	RNA polymerase II proximal promoter sequence-specific DNA binding	molecular_function	10	0.0243707	ENSRNOG00000026203	Pax8	paired box 8 [Source:RGD Symbol;Acc:620434]	0.878829	0.821269	0.820972	0.21796	0.383172	0.130189	3.44728	1.78546	up
GO:0000978	RNA polymerase II proximal promoter sequence-specific DNA binding	molecular_function	10	0.0243707	ENSRNOG00000058243	Rfx8	RFX family member 8, lacking RFX DNA binding domain [Source:RGD Symbol;Acc:1560724]	1.31132	1.61976	1.44162	3.76829	2.57726	3.05152	0.465327	-1.10368	down
GO:0006006	glucose metabolic process	biological_process	8	0.0257178	ENSRNOG00000001821	Adipoq	adiponectin, C1Q and collagen domain containing [Source:RGD Symbol;Acc:628748]	0.269142	0.528074	0.422021	2.31808	1.93395	13.321	0.0693811	-3.84931	down
GO:0006006	glucose metabolic process	biological_process	8	0.0257178	ENSRNOG00000028616	Pck1	phosphoenolpyruvate carboxykinase 1 [Source:RGD Symbol;Acc:3267]	0.294123	0.258891	0.731558	1.09133	1.59168	18.8392	0.0596858	-4.06647	down
GO:0006006	glucose metabolic process	biological_process	8	0.0257178	ENSRNOG00000045797	Lep	leptin [Source:RGD Symbol;Acc:3000]	0.038354	0.031345	0.037116	0.113483	0.270256	1.22499	0.0663972	-3.91273	down
GO:0004714	transmembrane receptor protein tyrosine kinase activity	molecular_function	9	0.0257178	ENSRNOG00000007865	Ephb1	Eph receptor B1 [Source:RGD Symbol;Acc:2556]	0.836464	0.793073	1.14742	0.471882	0.398737	0.218471	2.5498	1.35038	up
GO:0004714	transmembrane receptor protein tyrosine kinase activity	molecular_function	9	0.0257178	ENSRNOG00000014248	Erbb4	erb-b2 receptor tyrosine kinase 4 [Source:RGD Symbol;Acc:620486]	0.602772	0.820792	0.860173	0.247666	0.295959	0.240493	2.91249	1.54225	up
GO:0004714	transmembrane receptor protein tyrosine kinase activity	molecular_function	9	0.0257178	ENSRNOG00000053232	Ror2	receptor tyrosine kinase-like orphan receptor 2 [Source:RGD Symbol;Acc:1305275]	0.93753	0.843785	1.20048	2.20838	2.23265	2.21271	0.448138	-1.15799	down
GO:0045921	positive regulation of exocytosis	biological_process	8	0.025905	ENSRNOG00000005345	Vsnl1	visinin-like 1 [Source:RGD Symbol;Acc:3966]	3.32119	2.25945	2.2958	5.8539	5.06962	5.59122	0.476934	-1.06814	down
GO:0045921	positive regulation of exocytosis	biological_process	8	0.025905	ENSRNOG00000055103	Cftr	cystic fibrosis transmembrane conductance regulator [Source:RGD Symbol;Acc:2332]	1.14851	0.941143	0.718715	2.41175	2.46834	1.29678	0.454659	-1.13714	down
GO:0060045	positive regulation of cardiac muscle cell proliferation	biological_process	8	0.025905	ENSRNOG00000014248	Erbb4	erb-b2 receptor tyrosine kinase 4 [Source:RGD Symbol;Acc:620486]	0.602772	0.820792	0.860173	0.247666	0.295959	0.240493	2.91249	1.54225	up
GO:0060045	positive regulation of cardiac muscle cell proliferation	biological_process	8	0.025905	ENSRNOG00000025120	Gli1	GLI family zinc finger 1 [Source:RGD Symbol;Acc:621673]	0.698325	0.477126	0.544131	1.56395	1.68971	1.52278	0.360013	-1.47388	down
GO:2000379	positive regulation of reactive oxygen species metabolic process	biological_process	8	0.025905	ENSRNOG00000018005	Duoxa1	dual oxidase maturation factor 1 [Source:RGD Symbol;Acc:1306601]	5.56049	2.15936	4.37417	1.58063	1.28771	1.77397	2.60517	1.38138	up
GO:2000379	positive regulation of reactive oxygen species metabolic process	biological_process	8	0.025905	ENSRNOG00000045797	Lep	leptin [Source:RGD Symbol;Acc:3000]	0.038354	0.031345	0.037116	0.113483	0.270256	1.22499	0.0663972	-3.91273	down
GO:0048247	lymphocyte chemotaxis	biological_process	6	0.025905	ENSRNOG00000028548	Ccl9	chemokine (C-C motif) ligand 9 [Source:RGD Symbol;Acc:1310563]	37.5481	17.7937	27.4866	12.7972	13.0843	8.17364	2.43218	1.28225	up
GO:0048247	lymphocyte chemotaxis	biological_process	6	0.025905	ENSRNOG00000043342	LOC290595	hypothetical gene supported by AF152002 [Source:RGD Symbol;Acc:1566160]	0.873931	12.6402	1.47192	0	0.505809	0.50069	14.8893	3.89621	up
GO:0007599	hemostasis	biological_process	6	0.025905	ENSRNOG00000010935	Cpb2	carboxypeptidase B2 [Source:RGD Symbol;Acc:71035]	0.244928	0.291876	0.095584	0	0	0	2107.96	11.0416	up
GO:0007599	hemostasis	biological_process	6	0.025905	ENSRNOG00000050761	LOC100909524	serpin family A member 10 [Source:RGD Symbol;Acc:621220]	1.58588	1.13828	1.39171	0.39867	0.565611	0.809024	2.32102	1.21476	up
GO:0005198	structural molecule activity	molecular_function	3	0.0266027	ENSRNOG00000010263	Cldn11	claudin 11 [Source:RGD Symbol;Acc:71081]	2.68847	2.864	2.8561	5.43847	8.61906	7.68507	0.386732	-1.37059	down
GO:0005198	structural molecule activity	molecular_function	3	0.0266027	ENSRNOG00000016724	Epb41l3	erythrocyte membrane protein band 4.1-like 3 [Source:RGD Symbol;Acc:71089]	0.323093	0.245497	0.361631	0.556784	0.869599	1.02498	0.37947	-1.39794	down
GO:0005198	structural molecule activity	molecular_function	3	0.0266027	ENSRNOG00000039197	LOC108348074	collagen alpha-1(XV) chain-like [Source:RGD Symbol;Acc:11464459]	2.9943	2.28433	4.771	10.5648	7.14882	12.7016	0.330415	-1.59765	down
GO:0005198	structural molecule activity	molecular_function	3	0.0266027	ENSRNOG00000060381	Col15a1	collagen type XV alpha 1 chain [Source:RGD Symbol;Acc:1310820]	2.72355	3.70059	6.38776	17.7121	9.88001	14.3242	0.305655	-1.71003	down
GO:0120162	positive regulation of cold-induced thermogenesis	biological_process	7	0.0266027	ENSRNOG00000001821	Adipoq	adiponectin, C1Q and collagen domain containing [Source:RGD Symbol;Acc:628748]	0.269142	0.528074	0.422021	2.31808	1.93395	13.321	0.0693811	-3.84931	down
GO:0120162	positive regulation of cold-induced thermogenesis	biological_process	7	0.0266027	ENSRNOG00000003580	Ucp1	uncoupling protein 1 [Source:RGD Symbol;Acc:3931]	0	0	0	0	0	12.6582	2.37001e-05	-15.3647	down
GO:0120162	positive regulation of cold-induced thermogenesis	biological_process	7	0.0266027	ENSRNOG00000012674	Adrb3	adrenoceptor beta 3 [Source:RGD Symbol;Acc:2061]	0	0	0	0.089852	0.041841	1.01731	0.000261096	-11.9031	down
GO:0120162	positive regulation of cold-induced thermogenesis	biological_process	7	0.0266027	ENSRNOG00000045797	Lep	leptin [Source:RGD Symbol;Acc:3000]	0.038354	0.031345	0.037116	0.113483	0.270256	1.22499	0.0663972	-3.91273	down
GO:0016020	membrane	cellular_component	3	0.0266063	ENSRNOG00000000572	Chst3	carbohydrate sulfotransferase 3 [Source:RGD Symbol;Acc:620355]	1.16179	1.79049	1.49114	6.49275	3.57535	2.86355	0.343608	-1.54116	down
GO:0016020	membrane	cellular_component	3	0.0266063	ENSRNOG00000000700	Tmem119	transmembrane protein 119 [Source:RGD Symbol;Acc:1307573]	6.59079	6.90106	6.28528	11.3215	14.3882	15.1594	0.483913	-1.04718	down
GO:0016020	membrane	cellular_component	3	0.0266063	ENSRNOG00000001757	Tm4sf19	transmembrane 4 L six family member 19 [Source:RGD Symbol;Acc:1560486]	2.01858	2.04802	1.63897	0.629435	1.17491	0.72064	2.25964	1.17609	up
GO:0016020	membrane	cellular_component	3	0.0266063	ENSRNOG00000002046	Cd200r1l	CD200 receptor 1-like [Source:RGD Symbol;Acc:1563387]	5.77038	3.90674	4.22352	2.19257	2.47716	1.07152	2.42119	1.27572	up
GO:0016020	membrane	cellular_component	3	0.0266063	ENSRNOG00000002303	Kcnj12	potassium voltage-gated channel subfamily J member 12 [Source:RGD Symbol;Acc:621660]	1.13507	0.91256	0.709237	2.64599	1.68286	2.79866	0.386793	-1.37037	down
GO:0016020	membrane	cellular_component	3	0.0266063	ENSRNOG00000002364	Rnf112	ring finger protein 112 [Source:RGD Symbol;Acc:3986]	0.268859	0.283787	0.444264	0.501704	1.23498	0.948211	0.371303	-1.42933	down
GO:0016020	membrane	cellular_component	3	0.0266063	ENSRNOG00000003580	Ucp1	uncoupling protein 1 [Source:RGD Symbol;Acc:3931]	0	0	0	0	0	12.6582	2.37001e-05	-15.3647	down
GO:0016020	membrane	cellular_component	3	0.0266063	ENSRNOG00000003732	Flrt2	fibronectin leucine rich transmembrane protein 2 [Source:RGD Symbol;Acc:1308574]	1.80281	2.04289	1.39731	3.1207	4.03324	3.75719	0.480519	-1.05733	down
GO:0016020	membrane	cellular_component	3	0.0266063	ENSRNOG00000004704	Dcstamp	dendrocyte expressed seven transmembrane protein [Source:RGD Symbol;Acc:1310435]	1.90901	1.69538	1.40776	0.538062	0.697165	0.21095	3.4658	1.79319	up
GO:0016020	membrane	cellular_component	3	0.0266063	ENSRNOG00000005114	Tmem74	transmembrane protein 74 [Source:RGD Symbol;Acc:1566279]	0.02941	0.038311	0.05188	0.912558	0.252146	0.376225	0.0776162	-3.6875	down
GO:0016020	membrane	cellular_component	3	0.0266063	ENSRNOG00000005345	Vsnl1	visinin-like 1 [Source:RGD Symbol;Acc:3966]	3.32119	2.25945	2.2958	5.8539	5.06962	5.59122	0.476934	-1.06814	down
GO:0016020	membrane	cellular_component	3	0.0266063	ENSRNOG00000005650	Pgf	placental growth factor [Source:RGD Symbol;Acc:619850]	1.81335	1.74628	1.74662	2.71735	7.21811	5.43133	0.345306	-1.53405	down
GO:0016020	membrane	cellular_component	3	0.0266063	ENSRNOG00000006723	Itga11	integrin subunit alpha 11 [Source:RGD Symbol;Acc:1311711]	0.445333	0.566447	0.898136	1.71316	1.51553	1.32386	0.419528	-1.25316	down
GO:0016020	membrane	cellular_component	3	0.0266063	ENSRNOG00000007865	Ephb1	Eph receptor B1 [Source:RGD Symbol;Acc:2556]	0.836464	0.793073	1.14742	0.471882	0.398737	0.218471	2.5498	1.35038	up
GO:0016020	membrane	cellular_component	3	0.0266063	ENSRNOG00000007951	Galnt14	polypeptide N-acetylgalactosaminyltransferase 14 [Source:RGD Symbol;Acc:1310068]	1.22288	1.53036	1.57812	0.196292	0.565801	0.096151	5.04677	2.33536	up
GO:0016020	membrane	cellular_component	3	0.0266063	ENSRNOG00000008001	Rab3b	RAB3B, member RAS oncogene family [Source:RGD Symbol;Acc:620922]	2.76153	1.88236	3.18417	4.52952	5.74434	6.11997	0.4775	-1.06643	down
GO:0016020	membrane	cellular_component	3	0.0266063	ENSRNOG00000008098	Lrrc4	leucine rich repeat containing 4 [Source:RGD Symbol;Acc:1560026]	2.17239	1.99758	2.53782	5.27277	4.10377	5.20253	0.460097	-1.11999	down
GO:0016020	membrane	cellular_component	3	0.0266063	ENSRNOG00000008816	Gpnmb	glycoprotein nmb [Source:RGD Symbol;Acc:71008]	194.008	146.217	143.748	84.0387	88.9556	65.1415	2.03234	1.02314	up
GO:0016020	membrane	cellular_component	3	0.0266063	ENSRNOG00000009686	Aqp7	aquaporin 7 [Source:RGD Symbol;Acc:2145]	0.04156	0.071983	0.079689	0.169014	0.259968	3.27253	0.0522035	-4.25971	down
GO:0016020	membrane	cellular_component	3	0.0266063	ENSRNOG00000010263	Cldn11	claudin 11 [Source:RGD Symbol;Acc:71081]	2.68847	2.864	2.8561	5.43847	8.61906	7.68507	0.386732	-1.37059	down
GO:0016020	membrane	cellular_component	3	0.0266063	ENSRNOG00000011133	Trpc4	transient receptor potential cation channel, subfamily C, member 4 [Source:RGD Symbol;Acc:621276]	0.047885	0.130389	0.050748	0.258961	0.381343	0.332957	0.235314	-2.08734	down
GO:0016020	membrane	cellular_component	3	0.0266063	ENSRNOG00000012324	Soga3	SOGA family member 3 [Source:RGD Symbol;Acc:11479453]	0.978627	0.601285	0.868766	0.30792	0.18986	0.320749	2.99156	1.5809	up
GO:0016020	membrane	cellular_component	3	0.0266063	ENSRNOG00000012367	Pcdh7	protocadherin 7 [Source:RGD Symbol;Acc:1303209]	0.812085	0.617343	0.767092	1.37347	2.74181	1.534	0.388814	-1.36285	down
GO:0016020	membrane	cellular_component	3	0.0266063	ENSRNOG00000012674	Adrb3	adrenoceptor beta 3 [Source:RGD Symbol;Acc:2061]	0	0	0	0.089852	0.041841	1.01731	0.000261096	-11.9031	down
GO:0016020	membrane	cellular_component	3	0.0266063	ENSRNOG00000013306	Pcdh20	protocadherin 20 [Source:RGD Symbol;Acc:1306297]	0.199983	0.074123	0.181417	0.636184	0.284763	0.574304	0.304647	-1.71479	down
GO:0016020	membrane	cellular_component	3	0.0266063	ENSRNOG00000013887	Adra2b	adrenoceptor alpha 2B [Source:RGD Symbol;Acc:2057]	0.311704	0.246273	0.182689	0.886988	0.676955	1.17461	0.270458	-1.88652	down
GO:0016020	membrane	cellular_component	3	0.0266063	ENSRNOG00000014248	Erbb4	erb-b2 receptor tyrosine kinase 4 [Source:RGD Symbol;Acc:620486]	0.602772	0.820792	0.860173	0.247666	0.295959	0.240493	2.91249	1.54225	up
GO:0016020	membrane	cellular_component	3	0.0266063	ENSRNOG00000014265	Tnfrsf19	TNF receptor superfamily member 19 [Source:RGD Symbol;Acc:1564996]	0.292562	0.18351	0.32382	1.07666	0.397136	0.799481	0.351867	-1.5069	down
GO:0016020	membrane	cellular_component	3	0.0266063	ENSRNOG00000014398	Scara5	scavenger receptor class A, member 5 [Source:RGD Symbol;Acc:1306539]	2.21572	1.73413	2.82895	4.67709	3.10302	6.24355	0.483384	-1.04876	down
GO:0016020	membrane	cellular_component	3	0.0266063	ENSRNOG00000014465	Oca2	OCA2 melanosomal transmembrane protein [Source:RGD Symbol;Acc:2318412]	0	0	0	0.101048	0.120925	0.079096	0.000996449	-9.97092	down
GO:0016020	membrane	cellular_component	3	0.0266063	ENSRNOG00000014524	S1pr3	sphingosine-1-phosphate receptor 3 [Source:RGD Symbol;Acc:1583843]	9.98579	9.09143	8.73488	22.3581	16.5395	25.1183	0.434456	-1.20272	down
GO:0016020	membrane	cellular_component	3	0.0266063	ENSRNOG00000014691	Ric3	RIC3 acetylcholine receptor chaperone [Source:RGD Symbol;Acc:1588939]	0.888606	1.24696	0.624746	0.345167	0.236963	0.277397	3.21143	1.68322	up
GO:0016020	membrane	cellular_component	3	0.0266063	ENSRNOG00000014918	Klrg1	killer cell lectin like receptor G1 [Source:RGD Symbol;Acc:61978]	4.26076	7.30657	3.73	2.21767	1.5166	3.17449	2.21419	1.14678	up
GO:0016020	membrane	cellular_component	3	0.0266063	ENSRNOG00000015089	Mcoln2	mucolipin 2 [Source:RGD Symbol;Acc:1308884]	7.1303	6.82353	5.88089	3.61028	2.8491	3.26985	2.03867	1.02763	up
GO:0016020	membrane	cellular_component	3	0.0266063	ENSRNOG00000015763	Nat8f3	N-acetyltransferase 8 (GCN5-related) family member 3 [Source:RGD Symbol;Acc:621607]	1.70631	2.86391	2.56139	5.62887	3.47124	6.73715	0.450306	-1.15102	down
GO:0016020	membrane	cellular_component	3	0.0266063	ENSRNOG00000016070	Trpc3	transient receptor potential cation channel, subfamily C, member 3 [Source:RGD Symbol;Acc:61973]	0.998502	0.698946	0.823061	2.01864	2.08611	2.63759	0.373833	-1.41954	down
GO:0016020	membrane	cellular_component	3	0.0266063	ENSRNOG00000016177	Scara3	scavenger receptor class A, member 3 [Source:RGD Symbol;Acc:1309269]	5.49624	3.67234	4.02177	9.70825	9.66812	8.74041	0.469128	-1.09195	down
GO:0016020	membrane	cellular_component	3	0.0266063	ENSRNOG00000016949	Slc25a33	solute carrier family 25 member 33 [Source:RGD Symbol;Acc:1583942]	12.7926	13.8239	16.3486	29.8604	28.5655	33.4012	0.467891	-1.09576	down
GO:0016020	membrane	cellular_component	3	0.0266063	ENSRNOG00000017226	Slc2a4	solute carrier family 2 member 4 [Source:RGD Symbol;Acc:2711]	0.725115	0.747971	0.866538	1.38289	1.35574	3.8632	0.35439	-1.49659	down
GO:0016020	membrane	cellular_component	3	0.0266063	ENSRNOG00000018005	Duoxa1	dual oxidase maturation factor 1 [Source:RGD Symbol;Acc:1306601]	5.56049	2.15936	4.37417	1.58063	1.28771	1.77397	2.60517	1.38138	up
GO:0016020	membrane	cellular_component	3	0.0266063	ENSRNOG00000018644	Slc6a7	solute carrier family 6 member 7 [Source:RGD Symbol;Acc:620928]	1.38866	1.04448	0.392996	0.497343	0.247701	0.272771	2.77667	1.47335	up
GO:0016020	membrane	cellular_component	3	0.0266063	ENSRNOG00000018853	Slc28a3	solute carrier family 28 member 3 [Source:RGD Symbol;Acc:621224]	3.05653	3.81928	7.36752	12.4951	9.4451	10.0783	0.444846	-1.16862	down
GO:0016020	membrane	cellular_component	3	0.0266063	ENSRNOG00000018978	Scart1	scavenger receptor family member expressed on T-cells 1 [Source:RGD Symbol;Acc:1307378]	2.38235	3.22753	0.914079	0.607067	0.571033	0.709445	3.45632	1.78924	up
GO:0016020	membrane	cellular_component	3	0.0266063	ENSRNOG00000019163	Syt6	synaptotagmin 6 [Source:RGD Symbol;Acc:62012]	0.1703	0.178842	0.252158	0.527108	0.644704	0.817466	0.30227	-1.72609	down
GO:0016020	membrane	cellular_component	3	0.0266063	ENSRNOG00000019500	Cyp1a1	cytochrome P450, family 1, subfamily a, polypeptide 1 [Source:RGD Symbol;Acc:2458]	1.30617	2.01733	6.01601	22.1476	22.9681	33.3498	0.119027	-3.07064	down
GO:0016020	membrane	cellular_component	3	0.0266063	ENSRNOG00000019921	Rhbdl1	rhomboid like 1 [Source:RGD Symbol;Acc:620699]	1.56641	1.24922	0.921898	2.1812	3.31834	2.41805	0.472054	-1.08298	down
GO:0016020	membrane	cellular_component	3	0.0266063	ENSRNOG00000019985	Asic4	acid sensing ion channel subunit family member 4 [Source:RGD Symbol;Acc:621068]	1.22068	0.713135	0.167016	0.140032	0.161282	0.09395	5.31501	2.41007	up
GO:0016020	membrane	cellular_component	3	0.0266063	ENSRNOG00000020054	LOC108348201	protocadherin beta-7-like [Source:RGD Symbol;Acc:11368541]	0.582061	0.474989	0.669141	1.45791	0.928726	1.18222	0.483683	-1.04787	down
GO:0016020	membrane	cellular_component	3	0.0266063	ENSRNOG00000020484	Trpm5	transient receptor potential cation channel, subfamily M, member 5 [Source:RGD Symbol;Acc:1310620]	5.99927	5.86911	10.0597	17.4263	11.9153	18.1559	0.461669	-1.11507	down
GO:0016020	membrane	cellular_component	3	0.0266063	ENSRNOG00000020904	Cdc42ep2	CDC42 effector protein 2 [Source:RGD Symbol;Acc:1310253]	16.1048	13.5876	19.8116	27.6602	36.9112	34.8229	0.498057	-1.00562	down
GO:0016020	membrane	cellular_component	3	0.0266063	ENSRNOG00000020953	Ms4a7	membrane spanning 4-domains A7 [Source:RGD Symbol;Acc:1305549]	0.648986	0.344616	0.486748	1.45936	0.792644	1.83048	0.362611	-1.46351	down
GO:0016020	membrane	cellular_component	3	0.0266063	ENSRNOG00000020980	AABR07006278		12.7744	12.0944	13.6112	6.62593	6.44403	5.53424	2.06835	1.04848	up
GO:0016020	membrane	cellular_component	3	0.0266063	ENSRNOG00000021256	Adra1d	adrenoceptor alpha 1D [Source:RGD Symbol;Acc:62064]	0.263536	0.619624	0.355989	1.74131	1.36148	1.17567	0.289625	-1.78774	down
GO:0016020	membrane	cellular_component	3	0.0266063	ENSRNOG00000022239	Trarg1	trafficking regulator of GLUT4 (SLC2A4) 1 [Source:RGD Symbol;Acc:1307639]	2.12065	2.24179	2.81453	5.40766	4.54121	9.15362	0.375708	-1.41232	down
GO:0016020	membrane	cellular_component	3	0.0266063	ENSRNOG00000024257	Irgc	immunity related GTPase cinema [Source:RGD Symbol;Acc:1311107]	0.208652	0.053693	0.061863	0	0	0	1080.69	10.0777	up
GO:0016020	membrane	cellular_component	3	0.0266063	ENSRNOG00000025300	Fer1l6	fer-1-like family member 6 [Source:RGD Symbol;Acc:1564703]	0.0119834	0.0256819	0.0413083	0.345032	0.0490612	0.308355	0.112426	-3.15295	down
GO:0016020	membrane	cellular_component	3	0.0266063	ENSRNOG00000025476	Tmem252	transmembrane protein 252 [Source:RGD Symbol;Acc:1359349]	27.5989	27.3022	33.9055	45.5571	73.4687	68.909	0.47254	-1.08149	down
GO:0016020	membrane	cellular_component	3	0.0266063	ENSRNOG00000025670	Shisa3	shisa family member 3 [Source:RGD Symbol;Acc:1565710]	0	0	0	0.143603	0.113998	0.080675	0.00088685	-10.139	down
GO:0016020	membrane	cellular_component	3	0.0266063	ENSRNOG00000026061	Sirpb3	signal-regulatory protein beta 3 [Source:RGD Symbol;Acc:1566226]	2.12654	0.819535	1.51799	4.73302	2.62538	3.40954	0.41457	-1.27031	down
GO:0016020	membrane	cellular_component	3	0.0266063	ENSRNOG00000026661	Hcar1	hydroxycarboxylic acid receptor 1 [Source:RGD Symbol;Acc:1586364]	0	0	0.029443	0.149024	0.059517	0.789164	0.0295107	-5.08262	down
GO:0016020	membrane	cellular_component	3	0.0266063	ENSRNOG00000027767	Slc38a5	solute carrier family 38, member 5 [Source:RGD Symbol;Acc:620702]	3.29864	4.26098	4.74245	7.87061	7.30095	9.9667	0.489376	-1.03098	down
GO:0016020	membrane	cellular_component	3	0.0266063	ENSRNOG00000029342	Scn7a	sodium voltage-gated channel alpha subunit 7 [Source:RGD Symbol;Acc:61922]	11.5574	9.24312	13.5523	34.1139	29.6192	24.4067	0.389754	-1.35936	down
GO:0016020	membrane	cellular_component	3	0.0266063	ENSRNOG00000029644	Clec2l	C-type lectin domain family 2, member L [Source:RGD Symbol;Acc:1565373]	1.20902	0.984596	0.764145	6.04306	6.28006	5.00909	0.170651	-2.55088	down
GO:0016020	membrane	cellular_component	3	0.0266063	ENSRNOG00000030431	RT1-Db2	RT1 class II, locus Db2 [Source:RGD Symbol;Acc:1595922]	3.57562	1.76437	1.09238	0.503178	0.344361	1.19923	3.14269	1.652	up
GO:0016020	membrane	cellular_component	3	0.0266063	ENSRNOG00000031849	Armh4	armadillo-like helical domain containing 4 [Source:RGD Symbol;Acc:1310110]	0.572696	0.421501	0.535934	1.94215	1.26676	1.60099	0.318121	-1.65235	down
GO:0016020	membrane	cellular_component	3	0.0266063	ENSRNOG00000032417	Gabrp	gamma-aminobutyric acid type A receptor pi subunit [Source:RGD Symbol;Acc:620532]	0.092348	0.19525	0.36241	0.951681	0.704935	1.06596	0.238747	-2.06644	down
GO:0016020	membrane	cellular_component	3	0.0266063	ENSRNOG00000033348	Duox1	dual oxidase 1 [Source:RGD Symbol;Acc:628760]	4.03322	2.15876	3.55853	1.38054	1.11797	1.15612	2.668	1.41576	up
GO:0016020	membrane	cellular_component	3	0.0266063	ENSRNOG00000036984	Slco1a1	solute carrier organic anion transporter family, member 1a1 [Source:RGD Symbol;Acc:3700]	0.270199	0.433603	0.341127	0.058162	0.110115	0.019966	5.55096	2.47274	up
GO:0016020	membrane	cellular_component	3	0.0266063	ENSRNOG00000039759	Gpr34	G protein-coupled receptor 34 [Source:RGD Symbol;Acc:1563681]	2.33313	1.48465	2.24688	1.08496	0.821155	0.91494	2.14978	1.10419	up
GO:0016020	membrane	cellular_component	3	0.0266063	ENSRNOG00000045888	RGD1562667	similar to leukocyte mono-Ig-like receptor2 [Source:RGD Symbol;Acc:1562667]	8.06814	17.2991	8.47844	5.34585	2.64176	6.28168	2.37192	1.24606	up
GO:0016020	membrane	cellular_component	3	0.0266063	ENSRNOG00000046239	LOC100909612	mitochondrial brown fat uncoupling protein 1-like [Source:RGD Symbol;Acc:6502621]	0	0	0	0	0	5.27305	5.68931e-05	-14.1014	down
GO:0016020	membrane	cellular_component	3	0.0266063	ENSRNOG00000048145	Sstr1	somatostatin receptor 1 [Source:RGD Symbol;Acc:3762]	1.29021	1.61171	1.86831	0.504885	0.640927	0.601976	2.72929	1.44853	up
GO:0016020	membrane	cellular_component	3	0.0266063	ENSRNOG00000048239	Cxcr1	C-X-C motif chemokine receptor 1 [Source:RGD Symbol;Acc:2905]	16.0266	13.947	11.851	5.02716	3.39089	4.10572	3.33962	1.73968	up
GO:0016020	membrane	cellular_component	3	0.0266063	ENSRNOG00000049351	Nat8l	N-acetyltransferase 8-like [Source:RGD Symbol;Acc:1305719]	0.414609	0.359825	0.569127	1.06015	0.774246	1.71601	0.378425	-1.40192	down
GO:0016020	membrane	cellular_component	3	0.0266063	ENSRNOG00000049590	RT1-M2	RT1 class Ib, locus M2 [Source:RGD Symbol;Acc:3493]	1.05738	0.72803	0.844597	0.257868	0	0.133657	6.71734	2.74789	up
GO:0016020	membrane	cellular_component	3	0.0266063	ENSRNOG00000052486	Kcna6	potassium voltage-gated channel subfamily A member 6 [Source:RGD Symbol;Acc:62083]	0.206521	0.495587	0.476457	0.150545	0.128976	0.104822	3.06644	1.61657	up
GO:0016020	membrane	cellular_component	3	0.0266063	ENSRNOG00000053232	Ror2	receptor tyrosine kinase-like orphan receptor 2 [Source:RGD Symbol;Acc:1305275]	0.93753	0.843785	1.20048	2.20838	2.23265	2.21271	0.448138	-1.15799	down
GO:0016020	membrane	cellular_component	3	0.0266063	ENSRNOG00000054438	LOC292543	similar to solute carrier family 7 (cationic amino acid transporter, y+ system), member 3 [Source:RGD Symbol;Acc:1565097]	0.528722	0.612372	0.29992	0.047019	0.128095	0.082842	5.58628	2.48189	up
GO:0016020	membrane	cellular_component	3	0.0266063	ENSRNOG00000055103	Cftr	cystic fibrosis transmembrane conductance regulator [Source:RGD Symbol;Acc:2332]	1.14851	0.941143	0.718715	2.41175	2.46834	1.29678	0.454659	-1.13714	down
GO:0016020	membrane	cellular_component	3	0.0266063	ENSRNOG00000056697	Kcnab1	potassium voltage-gated channel subfamily A member regulatory beta subunit 1 [Source:RGD Symbol;Acc:61827]	3.31095	2.45264	1.755	1.07741	1.03743	1.28351	2.21242	1.14563	up
GO:0016020	membrane	cellular_component	3	0.0266063	ENSRNOG00000057189	LOC103690326	dendritic cell-specific transmembrane protein [Source:RGD Symbol;Acc:9418155]	2.02057	1.81366	1.48448	0.681452	0.577721	0.225501	3.58241	1.84093	up
GO:0016020	membrane	cellular_component	3	0.0266063	ENSRNOG00000057221	Scn3b	sodium voltage-gated channel beta subunit 3 [Source:RGD Symbol;Acc:621657]	21.0976	17.1091	25.2416	51.1686	32.1861	48.604	0.480819	-1.05643	down
GO:0016020	membrane	cellular_component	3	0.0266063	ENSRNOG00000057643	Klri2	killer cell lectin-like receptor family I member 2 [Source:RGD Symbol;Acc:1359205]	4.15407	4.85632	2.9182	1.3324	0.727116	2.385	2.68389	1.42433	up
GO:0016020	membrane	cellular_component	3	0.0266063	ENSRNOG00000058692	Slc26a4	solute carrier family 26 member 4 [Source:RGD Symbol;Acc:3293]	2.67212	1.9953	1.15691	1.03707	0.715431	0.934049	2.16796	1.11634	up
GO:0016020	membrane	cellular_component	3	0.0266063	ENSRNOG00000060246	Klrd1	killer cell lectin like receptor D1 [Source:RGD Symbol;Acc:2978]	13.655	21.5233	11.2525	7.56228	4.74204	9.73844	2.1064	1.07478	up
GO:0007283	spermatogenesis	biological_process	7	0.0268084	ENSRNOG00000000700	Tmem119	transmembrane protein 119 [Source:RGD Symbol;Acc:1307573]	6.59079	6.90106	6.28528	11.3215	14.3882	15.1594	0.483913	-1.04718	down
GO:0007283	spermatogenesis	biological_process	7	0.0268084	ENSRNOG00000009686	Aqp7	aquaporin 7 [Source:RGD Symbol;Acc:2145]	0.04156	0.071983	0.079689	0.169014	0.259968	3.27253	0.0522035	-4.25971	down
GO:0007283	spermatogenesis	biological_process	7	0.0268084	ENSRNOG00000010263	Cldn11	claudin 11 [Source:RGD Symbol;Acc:71081]	2.68847	2.864	2.8561	5.43847	8.61906	7.68507	0.386732	-1.37059	down
GO:0007283	spermatogenesis	biological_process	7	0.0268084	ENSRNOG00000014448	Arntl	aryl hydrocarbon receptor nuclear translocator-like [Source:RGD Symbol;Acc:62003]	12.2717	9.27036	6.63534	7.09622	2.94619	3.24836	2.12007	1.08411	up
GO:0007283	spermatogenesis	biological_process	7	0.0268084	ENSRNOG00000014505	Pmfbp1	polyamine modulated factor 1 binding protein 1 [Source:RGD Symbol;Acc:621677]	0.207092	0.0446111	0.0577034	0.524531	0.285313	0.497091	0.236742	-2.07861	down
GO:0007283	spermatogenesis	biological_process	7	0.0268084	ENSRNOG00000025120	Gli1	GLI family zinc finger 1 [Source:RGD Symbol;Acc:621673]	0.698325	0.477126	0.544131	1.56395	1.68971	1.52278	0.360013	-1.47388	down
GO:0007283	spermatogenesis	biological_process	7	0.0268084	ENSRNOG00000033209	Bmp8b	bone morphogenetic protein 8b [Source:RGD Symbol;Acc:1591873]	1.03207	1.66145	1.31074	0.262554	0.64986	0.54328	2.75076	1.45983	up
GO:0007283	spermatogenesis	biological_process	7	0.0268084	ENSRNOG00000048145	Sstr1	somatostatin receptor 1 [Source:RGD Symbol;Acc:3762]	1.29021	1.61171	1.86831	0.504885	0.640927	0.601976	2.72929	1.44853	up
GO:0005518	collagen binding	molecular_function	5	0.026996	ENSRNOG00000001249	Col6a1	collagen type VI alpha 1 chain [Source:RGD Symbol;Acc:1565398]	46.125	44.8447	58.8249	100.324	89.8661	110.945	0.497433	-1.00743	down
GO:0005518	collagen binding	molecular_function	5	0.026996	ENSRNOG00000002461	Nid1	nidogen 1 [Source:RGD Symbol;Acc:3178]	7.0868	7.3753	8.23495	25.6053	16.1071	15.6315	0.395806	-1.33713	down
GO:0005518	collagen binding	molecular_function	5	0.026996	ENSRNOG00000006723	Itga11	integrin subunit alpha 11 [Source:RGD Symbol;Acc:1311711]	0.445333	0.566447	0.898136	1.71316	1.51553	1.32386	0.419528	-1.25316	down
GO:0001819	positive regulation of cytokine production	biological_process	7	0.0282738	ENSRNOG00000015618	Wnt5a	Wnt family member 5A [Source:RGD Symbol;Acc:69250]	3.0348	2.5955	2.2052	6.68335	4.54321	6.14645	0.451016	-1.14875	down
GO:0001819	positive regulation of cytokine production	biological_process	7	0.0282738	ENSRNOG00000045797	Lep	leptin [Source:RGD Symbol;Acc:3000]	0.038354	0.031345	0.037116	0.113483	0.270256	1.22499	0.0663972	-3.91273	down
GO:0051603	proteolysis involved in cellular protein catabolic process	biological_process	8	0.0283076	ENSRNOG00000009172	Cpvl	carboxypeptidase, vitellogenic-like [Source:RGD Symbol;Acc:1563609]	0.429546	0.839735	0.861303	1.33746	1.63038	2.02442	0.426778	-1.22844	down
GO:0051603	proteolysis involved in cellular protein catabolic process	biological_process	8	0.0283076	ENSRNOG00000010603	Gzma	granzyme A [Source:RGD Symbol;Acc:628640]	37.3725	72.5884	41.9582	18.3746	12.8989	25.6912	2.6669	1.41516	up
GO:0051603	proteolysis involved in cellular protein catabolic process	biological_process	8	0.0283076	ENSRNOG00000018865	Adamts12	ADAM metallopeptidase with thrombospondin type 1 motif, 12 [Source:RGD Symbol;Acc:1307323]	1.22778	1.39158	1.85944	4.25796	2.71078	3.8658	0.413382	-1.27445	down
GO:0030324	lung development	biological_process	6	0.0284552	ENSRNOG00000013304	Arg1	arginase 1 [Source:RGD Symbol;Acc:2150]	14.1945	11.7175	9.74681	5.09255	6.15658	5.0671	2.18549	1.12795	up
GO:0030324	lung development	biological_process	6	0.0284552	ENSRNOG00000015618	Wnt5a	Wnt family member 5A [Source:RGD Symbol;Acc:69250]	3.0348	2.5955	2.2052	6.68335	4.54321	6.14645	0.451016	-1.14875	down
GO:0030324	lung development	biological_process	6	0.0284552	ENSRNOG00000022970	Nkx2-8	NK2 homeobox 8 [Source:RGD Symbol;Acc:1310629]	3.07131	2.63652	1.18154	0.114957	0.539575	0.18753	8.18155	3.03237	up
GO:0030324	lung development	biological_process	6	0.0284552	ENSRNOG00000025120	Gli1	GLI family zinc finger 1 [Source:RGD Symbol;Acc:621673]	0.698325	0.477126	0.544131	1.56395	1.68971	1.52278	0.360013	-1.47388	down
GO:0030154	cell differentiation	biological_process	5	0.0306852	ENSRNOG00000004537	Rxrg	retinoid X receptor gamma [Source:RGD Symbol;Acc:620046]	1.28978	1.42628	2.23642	3.66221	2.84174	4.15561	0.464605	-1.10592	down
GO:0030154	cell differentiation	biological_process	5	0.0306852	ENSRNOG00000005650	Pgf	placental growth factor [Source:RGD Symbol;Acc:619850]	1.81335	1.74628	1.74662	2.71735	7.21811	5.43133	0.345306	-1.53405	down
GO:0030154	cell differentiation	biological_process	5	0.0306852	ENSRNOG00000006565	Fstl4	follistatin-like 4 [Source:RGD Symbol;Acc:1307227]	1.13651	0.735415	0.132085	0.200113	0.165783	0.097167	4.32773	2.11361	up
GO:0030154	cell differentiation	biological_process	5	0.0306852	ENSRNOG00000011631	Fst	follistatin [Source:RGD Symbol;Acc:2633]	3.03205	2.47665	3.75114	7.03347	7.00825	7.06256	0.438766	-1.18848	down
GO:0030154	cell differentiation	biological_process	5	0.0306852	ENSRNOG00000015318	Heyl	hes-related family bHLH transcription factor with YRPW motif-like [Source:RGD Symbol;Acc:1305022]	2.94339	2.74707	3.0413	7.51638	10.985	9.78336	0.308709	-1.69568	down
GO:0030154	cell differentiation	biological_process	5	0.0306852	ENSRNOG00000016696	Angpt2	angiopoietin 2 [Source:RGD Symbol;Acc:621861]	3.01199	2.77709	3.05503	7.45684	6.76239	7.96137	0.398732	-1.32651	down
GO:0030154	cell differentiation	biological_process	5	0.0306852	ENSRNOG00000020792	Etv4	ets variant 4 [Source:RGD Symbol;Acc:1306524]	2.80913	2.96286	3.00357	5.37868	7.13604	6.82892	0.453666	-1.1403	down
GO:0030154	cell differentiation	biological_process	5	0.0306852	ENSRNOG00000022970	Nkx2-8	NK2 homeobox 8 [Source:RGD Symbol;Acc:1310629]	3.07131	2.63652	1.18154	0.114957	0.539575	0.18753	8.18155	3.03237	up
GO:0030154	cell differentiation	biological_process	5	0.0306852	ENSRNOG00000026203	Pax8	paired box 8 [Source:RGD Symbol;Acc:620434]	0.878829	0.821269	0.820972	0.21796	0.383172	0.130189	3.44728	1.78546	up
GO:0030154	cell differentiation	biological_process	5	0.0306852	ENSRNOG00000053232	Ror2	receptor tyrosine kinase-like orphan receptor 2 [Source:RGD Symbol;Acc:1305275]	0.93753	0.843785	1.20048	2.20838	2.23265	2.21271	0.448138	-1.15799	down
GO:0042742	defense response to bacterium	biological_process	8	0.0306982	ENSRNOG00000030332	Ighg1	immunoglobulin heavy constant gamma 1 [Source:RGD Symbol;Acc:1359539]	5.53172	6.5237	33.722	1.9498	0.877678	2.30912	8.91201	3.15575	up
GO:0042742	defense response to bacterium	biological_process	8	0.0306982	ENSRNOG00000042319	AABR07065814		6.68222	8.72294	9.77249	5.32954	2.55509	3.63014	2.18655	1.12866	up
GO:0042742	defense response to bacterium	biological_process	8	0.0306982	ENSRNOG00000042569	AABR07065811		9.52239	7.43076	3.45214	1.05548	0.953026	2.96165	4.10556	2.03758	up
GO:0042742	defense response to bacterium	biological_process	8	0.0306982	ENSRNOG00000043342	LOC290595	hypothetical gene supported by AF152002 [Source:RGD Symbol;Acc:1566160]	0.873931	12.6402	1.47192	0	0.505809	0.50069	14.8893	3.89621	up
GO:0042742	defense response to bacterium	biological_process	8	0.0306982	ENSRNOG00000048159	AABR07065778		6.58067	1.09822	4.45755	0.512362	0.399594	1.25736	5.5946	2.48403	up
GO:0010575	positive regulation of vascular endothelial growth factor production	biological_process	8	0.0307259	ENSRNOG00000004649	Il1b	interleukin 1 beta [Source:RGD Symbol;Acc:2891]	20.4545	17.8629	26.638	9.01274	9.02768	13.4852	2.0604	1.04293	up
GO:0010575	positive regulation of vascular endothelial growth factor production	biological_process	8	0.0307259	ENSRNOG00000018899	C5	complement C5 [Source:RGD Symbol;Acc:2237]	1.41673	11.2071	0.792005	0.351361	0.325713	0.313456	13.5441	3.7596	up
GO:0070372	regulation of ERK1 and ERK2 cascade	biological_process	11	0.0307259	ENSRNOG00000004649	Il1b	interleukin 1 beta [Source:RGD Symbol;Acc:2891]	20.4545	17.8629	26.638	9.01274	9.02768	13.4852	2.0604	1.04293	up
GO:0070372	regulation of ERK1 and ERK2 cascade	biological_process	11	0.0307259	ENSRNOG00000007865	Ephb1	Eph receptor B1 [Source:RGD Symbol;Acc:2556]	0.836464	0.793073	1.14742	0.471882	0.398737	0.218471	2.5498	1.35038	up
GO:0031090	organelle membrane	cellular_component	4	0.0310308	ENSRNOG00000003732	Flrt2	fibronectin leucine rich transmembrane protein 2 [Source:RGD Symbol;Acc:1308574]	1.80281	2.04289	1.39731	3.1207	4.03324	3.75719	0.480519	-1.05733	down
GO:0031090	organelle membrane	cellular_component	4	0.0310308	ENSRNOG00000019500	Cyp1a1	cytochrome P450, family 1, subfamily a, polypeptide 1 [Source:RGD Symbol;Acc:2458]	1.30617	2.01733	6.01601	22.1476	22.9681	33.3498	0.119027	-3.07064	down
GO:0031090	organelle membrane	cellular_component	4	0.0310308	ENSRNOG00000049351	Nat8l	N-acetyltransferase 8-like [Source:RGD Symbol;Acc:1305719]	0.414609	0.359825	0.569127	1.06015	0.774246	1.71601	0.378425	-1.40192	down
GO:0001938	positive regulation of endothelial cell proliferation	biological_process	9	0.0324421	ENSRNOG00000005650	Pgf	placental growth factor [Source:RGD Symbol;Acc:619850]	1.81335	1.74628	1.74662	2.71735	7.21811	5.43133	0.345306	-1.53405	down
GO:0001938	positive regulation of endothelial cell proliferation	biological_process	9	0.0324421	ENSRNOG00000013304	Arg1	arginase 1 [Source:RGD Symbol;Acc:2150]	14.1945	11.7175	9.74681	5.09255	6.15658	5.0671	2.18549	1.12795	up
GO:0001938	positive regulation of endothelial cell proliferation	biological_process	9	0.0324421	ENSRNOG00000015618	Wnt5a	Wnt family member 5A [Source:RGD Symbol;Acc:69250]	3.0348	2.5955	2.2052	6.68335	4.54321	6.14645	0.451016	-1.14875	down
GO:0004181	metallocarboxypeptidase activity	molecular_function	9	0.0332589	ENSRNOG00000008947	Cpz	carboxypeptidase Z [Source:RGD Symbol;Acc:620496]	3.96244	4.46341	5.17347	7.58641	9.99263	9.74149	0.497769	-1.00645	down
GO:0004181	metallocarboxypeptidase activity	molecular_function	9	0.0332589	ENSRNOG00000010935	Cpb2	carboxypeptidase B2 [Source:RGD Symbol;Acc:71035]	0.244928	0.291876	0.095584	0	0	0	2107.96	11.0416	up
GO:0035987	endodermal cell differentiation	biological_process	6	0.0332589	ENSRNOG00000001249	Col6a1	collagen type VI alpha 1 chain [Source:RGD Symbol;Acc:1565398]	46.125	44.8447	58.8249	100.324	89.8661	110.945	0.497433	-1.00743	down
GO:0035987	endodermal cell differentiation	biological_process	6	0.0332589	ENSRNOG00000016695	Mmp2	matrix metallopeptidase 2 [Source:RGD Symbol;Acc:621316]	30.7938	26.2646	32.2348	67.5082	55.093	74.8328	0.452269	-1.14475	down
GO:1900745	positive regulation of p38MAPK cascade	biological_process	13	0.0332589	ENSRNOG00000004649	Il1b	interleukin 1 beta [Source:RGD Symbol;Acc:2891]	20.4545	17.8629	26.638	9.01274	9.02768	13.4852	2.0604	1.04293	up
GO:1900745	positive regulation of p38MAPK cascade	biological_process	13	0.0332589	ENSRNOG00000045797	Lep	leptin [Source:RGD Symbol;Acc:3000]	0.038354	0.031345	0.037116	0.113483	0.270256	1.22499	0.0663972	-3.91273	down
GO:0045807	positive regulation of endocytosis	biological_process	8	0.0332589	ENSRNOG00000015618	Wnt5a	Wnt family member 5A [Source:RGD Symbol;Acc:69250]	3.0348	2.5955	2.2052	6.68335	4.54321	6.14645	0.451016	-1.14875	down
GO:0045807	positive regulation of endocytosis	biological_process	8	0.0332589	ENSRNOG00000032828	Mapk8ip2	mitogen-activated protein kinase 8 interacting protein 2 [Source:RGD Symbol;Acc:1309727]	0	0.011052	0	0.164696	0.033483	0.104562	0.0365065	-4.7757	down
GO:0050853	B cell receptor signaling pathway	biological_process	8	0.0334151	ENSRNOG00000030332	Ighg1	immunoglobulin heavy constant gamma 1 [Source:RGD Symbol;Acc:1359539]	5.53172	6.5237	33.722	1.9498	0.877678	2.30912	8.91201	3.15575	up
GO:0050853	B cell receptor signaling pathway	biological_process	8	0.0334151	ENSRNOG00000042319	AABR07065814		6.68222	8.72294	9.77249	5.32954	2.55509	3.63014	2.18655	1.12866	up
GO:0050853	B cell receptor signaling pathway	biological_process	8	0.0334151	ENSRNOG00000042569	AABR07065811		9.52239	7.43076	3.45214	1.05548	0.953026	2.96165	4.10556	2.03758	up
GO:0050853	B cell receptor signaling pathway	biological_process	8	0.0334151	ENSRNOG00000048159	AABR07065778		6.58067	1.09822	4.45755	0.512362	0.399594	1.25736	5.5946	2.48403	up
GO:0009611	response to wounding	biological_process	5	0.0353639	ENSRNOG00000013304	Arg1	arginase 1 [Source:RGD Symbol;Acc:2150]	14.1945	11.7175	9.74681	5.09255	6.15658	5.0671	2.18549	1.12795	up
GO:0009611	response to wounding	biological_process	5	0.0353639	ENSRNOG00000019500	Cyp1a1	cytochrome P450, family 1, subfamily a, polypeptide 1 [Source:RGD Symbol;Acc:2458]	1.30617	2.01733	6.01601	22.1476	22.9681	33.3498	0.119027	-3.07064	down
GO:0009611	response to wounding	biological_process	5	0.0353639	ENSRNOG00000025120	Gli1	GLI family zinc finger 1 [Source:RGD Symbol;Acc:621673]	0.698325	0.477126	0.544131	1.56395	1.68971	1.52278	0.360013	-1.47388	down
GO:0055056	D-glucose transmembrane transporter activity	molecular_function	10	0.0355665	ENSRNOG00000017226	Slc2a4	solute carrier family 2 member 4 [Source:RGD Symbol;Acc:2711]	0.725115	0.747971	0.866538	1.38289	1.35574	3.8632	0.35439	-1.49659	down
GO:0098868	bone growth	biological_process	5	0.0355665	ENSRNOG00000045797	Lep	leptin [Source:RGD Symbol;Acc:3000]	0.038354	0.031345	0.037116	0.113483	0.270256	1.22499	0.0663972	-3.91273	down
GO:0061113	pancreas morphogenesis	biological_process	6	0.0355665	ENSRNOG00000004725	Cela1	chymotrypsin like elastase 1 [Source:RGD Symbol;Acc:2547]	25.6612	19.6849	15.4892	7.22067	12.5953	7.85221	2.19875	1.13668	up
GO:0014719	skeletal muscle satellite cell activation	biological_process	5	0.0355665	ENSRNOG00000007865	Ephb1	Eph receptor B1 [Source:RGD Symbol;Acc:2556]	0.836464	0.793073	1.14742	0.471882	0.398737	0.218471	2.5498	1.35038	up
GO:0007442	hindgut morphogenesis	biological_process	5	0.0355665	ENSRNOG00000015618	Wnt5a	Wnt family member 5A [Source:RGD Symbol;Acc:69250]	3.0348	2.5955	2.2052	6.68335	4.54321	6.14645	0.451016	-1.14875	down
GO:0046483	heterocycle metabolic process	biological_process	5	0.0355665	ENSRNOG00000019500	Cyp1a1	cytochrome P450, family 1, subfamily a, polypeptide 1 [Source:RGD Symbol;Acc:2458]	1.30617	2.01733	6.01601	22.1476	22.9681	33.3498	0.119027	-3.07064	down
GO:0071332	cellular response to fructose stimulus	biological_process	10	0.0355665	ENSRNOG00000028616	Pck1	phosphoenolpyruvate carboxykinase 1 [Source:RGD Symbol;Acc:3267]	0.294123	0.258891	0.731558	1.09133	1.59168	18.8392	0.0596858	-4.06647	down
GO:0014829	vascular smooth muscle contraction	biological_process	8	0.0355665	ENSRNOG00000058039	Acta2	actin alpha 2, smooth muscle [Source:RGD Symbol;Acc:621676]	74.1844	84.8511	106.259	171.41	140.048	239.067	0.481892	-1.05322	down
GO:0031628	opioid receptor binding	molecular_function	7	0.0355665	ENSRNOG00000008943	Penk	proenkephalin [Source:RGD Symbol;Acc:68946]	1.132	1.55783	3.43566	0.621514	0.959967	0.863637	2.50519	1.32492	up
GO:0072014	proximal tubule development	biological_process	8	0.0355665	ENSRNOG00000015318	Heyl	hes-related family bHLH transcription factor with YRPW motif-like [Source:RGD Symbol;Acc:1305022]	2.94339	2.74707	3.0413	7.51638	10.985	9.78336	0.308709	-1.69568	down
GO:1903817	negative regulation of voltage-gated potassium channel activity	biological_process	9	0.0355665	ENSRNOG00000056697	Kcnab1	potassium voltage-gated channel subfamily A member regulatory beta subunit 1 [Source:RGD Symbol;Acc:61827]	3.31095	2.45264	1.755	1.07741	1.03743	1.28351	2.21242	1.14563	up
GO:0015218	pyrimidine nucleotide transmembrane transporter activity	molecular_function	7	0.0355665	ENSRNOG00000016949	Slc25a33	solute carrier family 25 member 33 [Source:RGD Symbol;Acc:1583942]	12.7926	13.8239	16.3486	29.8604	28.5655	33.4012	0.467891	-1.09576	down
GO:1901509	regulation of endothelial tube morphogenesis	biological_process	8	0.0355665	ENSRNOG00000018865	Adamts12	ADAM metallopeptidase with thrombospondin type 1 motif, 12 [Source:RGD Symbol;Acc:1307323]	1.22778	1.39158	1.85944	4.25796	2.71078	3.8658	0.413382	-1.27445	down
GO:0032310	prostaglandin secretion	biological_process	10	0.0355665	ENSRNOG00000045797	Lep	leptin [Source:RGD Symbol;Acc:3000]	0.038354	0.031345	0.037116	0.113483	0.270256	1.22499	0.0663972	-3.91273	down
GO:0003402	planar cell polarity pathway involved in axis elongation	biological_process	10	0.0355665	ENSRNOG00000015618	Wnt5a	Wnt family member 5A [Source:RGD Symbol;Acc:69250]	3.0348	2.5955	2.2052	6.68335	4.54321	6.14645	0.451016	-1.14875	down
GO:0015254	glycerol channel activity	molecular_function	7	0.0355665	ENSRNOG00000009686	Aqp7	aquaporin 7 [Source:RGD Symbol;Acc:2145]	0.04156	0.071983	0.079689	0.169014	0.259968	3.27253	0.0522035	-4.25971	down
GO:2000345	regulation of hepatocyte proliferation	biological_process	8	0.0355665	ENSRNOG00000025120	Gli1	GLI family zinc finger 1 [Source:RGD Symbol;Acc:621673]	0.698325	0.477126	0.544131	1.56395	1.68971	1.52278	0.360013	-1.47388	down
GO:0002025	norepinephrine-epinephrine-mediated vasodilation involved in regulation of systemic arterial blood pressure	biological_process	8	0.0355665	ENSRNOG00000012674	Adrb3	adrenoceptor beta 3 [Source:RGD Symbol;Acc:2061]	0	0	0	0.089852	0.041841	1.01731	0.000261096	-11.9031	down
GO:2000074	regulation of type B pancreatic cell development	biological_process	8	0.0355665	ENSRNOG00000014448	Arntl	aryl hydrocarbon receptor nuclear translocator-like [Source:RGD Symbol;Acc:62003]	12.2717	9.27036	6.63534	7.09622	2.94619	3.24836	2.12007	1.08411	up
GO:0006475	internal protein amino acid acetylation	biological_process	11	0.0355665	ENSRNOG00000028616	Pck1	phosphoenolpyruvate carboxykinase 1 [Source:RGD Symbol;Acc:3267]	0.294123	0.258891	0.731558	1.09133	1.59168	18.8392	0.0596858	-4.06647	down
GO:0004938	alpha2-adrenergic receptor activity	molecular_function	10	0.0355665	ENSRNOG00000013887	Adra2b	adrenoceptor alpha 2B [Source:RGD Symbol;Acc:2057]	0.311704	0.246273	0.182689	0.886988	0.676955	1.17461	0.270458	-1.88652	down
GO:0070093	negative regulation of glucagon secretion	biological_process	11	0.0355665	ENSRNOG00000045797	Lep	leptin [Source:RGD Symbol;Acc:3000]	0.038354	0.031345	0.037116	0.113483	0.270256	1.22499	0.0663972	-3.91273	down
GO:0021938	smoothened signaling pathway involved in regulation of cerebellar granule cell precursor cell proliferation	biological_process	7	0.0355665	ENSRNOG00000025120	Gli1	GLI family zinc finger 1 [Source:RGD Symbol;Acc:621673]	0.698325	0.477126	0.544131	1.56395	1.68971	1.52278	0.360013	-1.47388	down
GO:0034505	tooth mineralization	biological_process	7	0.0355665	ENSRNOG00000003897	Col1a1	collagen type I alpha 1 chain [Source:RGD Symbol;Acc:61817]	21.9343	20.0594	21.0288	58.1167	63.4283	51.677	0.363825	-1.45869	down
GO:0003331	positive regulation of extracellular matrix constituent secretion	biological_process	9	0.0355665	ENSRNOG00000010935	Cpb2	carboxypeptidase B2 [Source:RGD Symbol;Acc:71035]	0.244928	0.291876	0.095584	0	0	0	2107.96	11.0416	up
GO:0038031	non-canonical Wnt signaling pathway via JNK cascade	biological_process	10	0.0355665	ENSRNOG00000015618	Wnt5a	Wnt family member 5A [Source:RGD Symbol;Acc:69250]	3.0348	2.5955	2.2052	6.68335	4.54321	6.14645	0.451016	-1.14875	down
GO:0060157	urinary bladder development	biological_process	6	0.0355665	ENSRNOG00000015618	Wnt5a	Wnt family member 5A [Source:RGD Symbol;Acc:69250]	3.0348	2.5955	2.2052	6.68335	4.54321	6.14645	0.451016	-1.14875	down
GO:0033686	positive regulation of luteinizing hormone secretion	biological_process	10	0.0355665	ENSRNOG00000045797	Lep	leptin [Source:RGD Symbol;Acc:3000]	0.038354	0.031345	0.037116	0.113483	0.270256	1.22499	0.0663972	-3.91273	down
GO:0030485	smooth muscle contractile fiber	cellular_component	7	0.0355665	ENSRNOG00000058039	Acta2	actin alpha 2, smooth muscle [Source:RGD Symbol;Acc:621676]	74.1844	84.8511	106.259	171.41	140.048	239.067	0.481892	-1.05322	down
GO:0010760	negative regulation of macrophage chemotaxis	biological_process	9	0.0355665	ENSRNOG00000018899	C5	complement C5 [Source:RGD Symbol;Acc:2237]	1.41673	11.2071	0.792005	0.351361	0.325713	0.313456	13.5441	3.7596	up
GO:0034189	very-low-density lipoprotein particle binding	molecular_function	5	0.0355665	ENSRNOG00000013578	Trem2	triggering receptor expressed on myeloid cells 2 [Source:RGD Symbol;Acc:1309841]	10.8948	5.01708	5.6079	3.19457	3.44342	4.12088	2.00019	1.00014	up
GO:0030730	sequestering of triglyceride	biological_process	6	0.0355665	ENSRNOG00000004649	Il1b	interleukin 1 beta [Source:RGD Symbol;Acc:2891]	20.4545	17.8629	26.638	9.01274	9.02768	13.4852	2.0604	1.04293	up
GO:0060414	aorta smooth muscle tissue morphogenesis	biological_process	7	0.0355665	ENSRNOG00000003357	Col3a1	collagen type III alpha 1 chain [Source:RGD Symbol;Acc:71029]	156.474	148.568	159.465	332.712	580.742	362.723	0.363983	-1.45806	down
GO:0018125	peptidyl-cysteine methylation	biological_process	11	0.0355665	ENSRNOG00000008001	Rab3b	RAB3B, member RAS oncogene family [Source:RGD Symbol;Acc:620922]	2.76153	1.88236	3.18417	4.52952	5.74434	6.11997	0.4775	-1.06643	down
GO:2001016	positive regulation of skeletal muscle cell differentiation	biological_process	8	0.0355665	ENSRNOG00000014448	Arntl	aryl hydrocarbon receptor nuclear translocator-like [Source:RGD Symbol;Acc:62003]	12.2717	9.27036	6.63534	7.09622	2.94619	3.24836	2.12007	1.08411	up
GO:0015111	iodide transmembrane transporter activity	molecular_function	8	0.0355665	ENSRNOG00000058692	Slc26a4	solute carrier family 26 member 4 [Source:RGD Symbol;Acc:3293]	2.67212	1.9953	1.15691	1.03707	0.715431	0.934049	2.16796	1.11634	up
GO:0051964	negative regulation of synapse assembly	biological_process	8	0.0355665	ENSRNOG00000015618	Wnt5a	Wnt family member 5A [Source:RGD Symbol;Acc:69250]	3.0348	2.5955	2.2052	6.68335	4.54321	6.14645	0.451016	-1.14875	down
GO:0072359	circulatory system development	biological_process	6	0.0355665	ENSRNOG00000015318	Heyl	hes-related family bHLH transcription factor with YRPW motif-like [Source:RGD Symbol;Acc:1305022]	2.94339	2.74707	3.0413	7.51638	10.985	9.78336	0.308709	-1.69568	down
GO:0021891	olfactory bulb interneuron development	biological_process	9	0.0355665	ENSRNOG00000015618	Wnt5a	Wnt family member 5A [Source:RGD Symbol;Acc:69250]	3.0348	2.5955	2.2052	6.68335	4.54321	6.14645	0.451016	-1.14875	down
GO:0031622	positive regulation of fever generation	biological_process	11	0.0355665	ENSRNOG00000004649	Il1b	interleukin 1 beta [Source:RGD Symbol;Acc:2891]	20.4545	17.8629	26.638	9.01274	9.02768	13.4852	2.0604	1.04293	up
GO:0045833	negative regulation of lipid metabolic process	biological_process	7	0.0355665	ENSRNOG00000004649	Il1b	interleukin 1 beta [Source:RGD Symbol;Acc:2891]	20.4545	17.8629	26.638	9.01274	9.02768	13.4852	2.0604	1.04293	up
GO:0015265	urea channel activity	molecular_function	7	0.0355665	ENSRNOG00000009686	Aqp7	aquaporin 7 [Source:RGD Symbol;Acc:2145]	0.04156	0.071983	0.079689	0.169014	0.259968	3.27253	0.0522035	-4.25971	down
GO:0051365	cellular response to potassium ion starvation	biological_process	9	0.0355665	ENSRNOG00000028616	Pck1	phosphoenolpyruvate carboxykinase 1 [Source:RGD Symbol;Acc:3267]	0.294123	0.258891	0.731558	1.09133	1.59168	18.8392	0.0596858	-4.06647	down
GO:0004937	alpha1-adrenergic receptor activity	molecular_function	10	0.0355665	ENSRNOG00000021256	Adra1d	adrenoceptor alpha 1D [Source:RGD Symbol;Acc:62064]	0.263536	0.619624	0.355989	1.74131	1.36148	1.17567	0.289625	-1.78774	down
GO:0101020	estrogen 16-alpha-hydroxylase activity	molecular_function	7	0.0355665	ENSRNOG00000019500	Cyp1a1	cytochrome P450, family 1, subfamily a, polypeptide 1 [Source:RGD Symbol;Acc:2458]	1.30617	2.01733	6.01601	22.1476	22.9681	33.3498	0.119027	-3.07064	down
GO:1990519	pyrimidine nucleotide import into mitochondrion	biological_process	10	0.0355665	ENSRNOG00000016949	Slc25a33	solute carrier family 25 member 33 [Source:RGD Symbol;Acc:1583942]	12.7926	13.8239	16.3486	29.8604	28.5655	33.4012	0.467891	-1.09576	down
GO:2000346	negative regulation of hepatocyte proliferation	biological_process	9	0.0355665	ENSRNOG00000010935	Cpb2	carboxypeptidase B2 [Source:RGD Symbol;Acc:71035]	0.244928	0.291876	0.095584	0	0	0	2107.96	11.0416	up
GO:1904640	response to methionine	biological_process	7	0.0355665	ENSRNOG00000028616	Pck1	phosphoenolpyruvate carboxykinase 1 [Source:RGD Symbol;Acc:3267]	0.294123	0.258891	0.731558	1.09133	1.59168	18.8392	0.0596858	-4.06647	down
GO:0010829	negative regulation of glucose transmembrane transport	biological_process	9	0.0355665	ENSRNOG00000004649	Il1b	interleukin 1 beta [Source:RGD Symbol;Acc:2891]	20.4545	17.8629	26.638	9.01274	9.02768	13.4852	2.0604	1.04293	up
GO:0097494	regulation of vesicle size	biological_process	6	0.0355665	ENSRNOG00000008001	Rab3b	RAB3B, member RAS oncogene family [Source:RGD Symbol;Acc:620922]	2.76153	1.88236	3.18417	4.52952	5.74434	6.11997	0.4775	-1.06643	down
GO:0071953	elastic fiber	cellular_component	5	0.0355665	ENSRNOG00000001469	Eln	elastin [Source:RGD Symbol;Acc:67394]	73.1078	65.5134	68.0227	159.291	311.13	177.739	0.318816	-1.6492	down
GO:0010510	regulation of acetyl-CoA biosynthetic process from pyruvate	biological_process	10	0.0355665	ENSRNOG00000009565	Pdk4	pyruvate dehydrogenase kinase 4 [Source:RGD Symbol;Acc:69061]	4.36221	3.78789	4.40906	9.63669	7.51304	17.2593	0.364996	-1.45405	down
GO:2000343	positive regulation of chemokine (C-X-C motif) ligand 2 production	biological_process	9	0.0355665	ENSRNOG00000015089	Mcoln2	mucolipin 2 [Source:RGD Symbol;Acc:1308884]	7.1303	6.82353	5.88089	3.61028	2.8491	3.26985	2.03867	1.02763	up
GO:0060688	regulation of morphogenesis of a branching structure	biological_process	7	0.0355665	ENSRNOG00000005650	Pgf	placental growth factor [Source:RGD Symbol;Acc:619850]	1.81335	1.74628	1.74662	2.71735	7.21811	5.43133	0.345306	-1.53405	down
GO:0001660	fever generation	biological_process	9	0.0355665	ENSRNOG00000004649	Il1b	interleukin 1 beta [Source:RGD Symbol;Acc:2891]	20.4545	17.8629	26.638	9.01274	9.02768	13.4852	2.0604	1.04293	up
GO:0009624	response to nematode	biological_process	7	0.0355665	ENSRNOG00000019500	Cyp1a1	cytochrome P450, family 1, subfamily a, polypeptide 1 [Source:RGD Symbol;Acc:2458]	1.30617	2.01733	6.01601	22.1476	22.9681	33.3498	0.119027	-3.07064	down
GO:0002118	aggressive behavior	biological_process	5	0.0355665	ENSRNOG00000008943	Penk	proenkephalin [Source:RGD Symbol;Acc:68946]	1.132	1.55783	3.43566	0.621514	0.959967	0.863637	2.50519	1.32492	up
GO:1900212	negative regulation of mesenchymal cell apoptotic process involved in metanephros development	biological_process	10	0.0355665	ENSRNOG00000026203	Pax8	paired box 8 [Source:RGD Symbol;Acc:620434]	0.878829	0.821269	0.820972	0.21796	0.383172	0.130189	3.44728	1.78546	up
GO:0097325	melanocyte proliferation	biological_process	5	0.0355665	ENSRNOG00000015618	Wnt5a	Wnt family member 5A [Source:RGD Symbol;Acc:69250]	3.0348	2.5955	2.2052	6.68335	4.54321	6.14645	0.451016	-1.14875	down
GO:0090403	oxidative stress-induced premature senescence	biological_process	8	0.0355665	ENSRNOG00000014448	Arntl	aryl hydrocarbon receptor nuclear translocator-like [Source:RGD Symbol;Acc:62003]	12.2717	9.27036	6.63534	7.09622	2.94619	3.24836	2.12007	1.08411	up
GO:0032651	regulation of interleukin-1 beta production	biological_process	8	0.0355665	ENSRNOG00000014524	S1pr3	sphingosine-1-phosphate receptor 3 [Source:RGD Symbol;Acc:1583843]	9.98579	9.09143	8.73488	22.3581	16.5395	25.1183	0.434456	-1.20272	down
GO:0021696	cerebellar cortex morphogenesis	biological_process	5	0.0355665	ENSRNOG00000025120	Gli1	GLI family zinc finger 1 [Source:RGD Symbol;Acc:621673]	0.698325	0.477126	0.544131	1.56395	1.68971	1.52278	0.360013	-1.47388	down
GO:0031649	heat generation	biological_process	6	0.0355665	ENSRNOG00000012674	Adrb3	adrenoceptor beta 3 [Source:RGD Symbol;Acc:2061]	0	0	0	0.089852	0.041841	1.01731	0.000261096	-11.9031	down
GO:0072278	metanephric comma-shaped body morphogenesis	biological_process	6	0.0355665	ENSRNOG00000026203	Pax8	paired box 8 [Source:RGD Symbol;Acc:620434]	0.878829	0.821269	0.820972	0.21796	0.383172	0.130189	3.44728	1.78546	up
GO:0010866	regulation of triglyceride biosynthetic process	biological_process	8	0.0355665	ENSRNOG00000012404	Thrsp	thyroid hormone responsive [Source:RGD Symbol;Acc:3859]	0.577546	0.320142	0.530996	1.2563	0.946753	66.5639	0.0207757	-5.58896	down
GO:0070487	monocyte aggregation	biological_process	8	0.0355665	ENSRNOG00000004649	Il1b	interleukin 1 beta [Source:RGD Symbol;Acc:2891]	20.4545	17.8629	26.638	9.01274	9.02768	13.4852	2.0604	1.04293	up
GO:0048014	Tie signaling pathway	biological_process	8	0.0355665	ENSRNOG00000016696	Angpt2	angiopoietin 2 [Source:RGD Symbol;Acc:621861]	3.01199	2.77709	3.05503	7.45684	6.76239	7.96137	0.398732	-1.32651	down
GO:0035241	protein-arginine omega-N monomethyltransferase activity	molecular_function	9	0.0355665	ENSRNOG00000053804	Prmt8	protein arginine methyltransferase 8 [Source:RGD Symbol;Acc:1587677]	0.332504	0.569915	0.192181	0.028857	0	0.008121	29.6014	4.88759	up
GO:0006188	IMP biosynthetic process	biological_process	12	0.0355665	ENSRNOG00000018656	Ampd1	adenosine monophosphate deaminase 1 [Source:RGD Symbol;Acc:2109]	0.090801	0.074378	0.16613	0.011129	0	0	29.7699	4.89578	up
GO:0006114	glycerol biosynthetic process	biological_process	9	0.0355665	ENSRNOG00000045797	Lep	leptin [Source:RGD Symbol;Acc:3000]	0.038354	0.031345	0.037116	0.113483	0.270256	1.22499	0.0663972	-3.91273	down
GO:0003876	AMP deaminase activity	molecular_function	8	0.0355665	ENSRNOG00000018656	Ampd1	adenosine monophosphate deaminase 1 [Source:RGD Symbol;Acc:2109]	0.090801	0.074378	0.16613	0.011129	0	0	29.7699	4.89578	up
GO:0033189	response to vitamin A	biological_process	9	0.0358706	ENSRNOG00000013304	Arg1	arginase 1 [Source:RGD Symbol;Acc:2150]	14.1945	11.7175	9.74681	5.09255	6.15658	5.0671	2.18549	1.12795	up
GO:0033189	response to vitamin A	biological_process	9	0.0358706	ENSRNOG00000019500	Cyp1a1	cytochrome P450, family 1, subfamily a, polypeptide 1 [Source:RGD Symbol;Acc:2458]	1.30617	2.01733	6.01601	22.1476	22.9681	33.3498	0.119027	-3.07064	down
GO:0005811	lipid droplet	cellular_component	6	0.036874	ENSRNOG00000009153	Cidec	cell death-inducing DFFA-like effector c [Source:RGD Symbol;Acc:1562113]	1.82237	1.06031	0.893204	1.91644	3.21254	6.54409	0.32347	-1.6283	down
GO:0005811	lipid droplet	cellular_component	6	0.036874	ENSRNOG00000009686	Aqp7	aquaporin 7 [Source:RGD Symbol;Acc:2145]	0.04156	0.071983	0.079689	0.169014	0.259968	3.27253	0.0522035	-4.25971	down
GO:0005811	lipid droplet	cellular_component	6	0.036874	ENSRNOG00000015086	Plin1	perilipin 1 [Source:RGD Symbol;Acc:3351]	0.0379376	0.130319	0.10534	0.403844	0.353187	6.83666	0.0360294	-4.79468	down
GO:0071222	cellular response to lipopolysaccharide	biological_process	8	0.037377	ENSRNOG00000002792	Cxcl2	C-X-C motif chemokine ligand 2 [Source:RGD Symbol;Acc:70069]	2.49155	1.56141	2.22508	0.21844	0.639161	0.597588	4.31425	2.10911	up
GO:0071222	cellular response to lipopolysaccharide	biological_process	8	0.037377	ENSRNOG00000013304	Arg1	arginase 1 [Source:RGD Symbol;Acc:2150]	14.1945	11.7175	9.74681	5.09255	6.15658	5.0671	2.18549	1.12795	up
GO:0071222	cellular response to lipopolysaccharide	biological_process	8	0.037377	ENSRNOG00000015618	Wnt5a	Wnt family member 5A [Source:RGD Symbol;Acc:69250]	3.0348	2.5955	2.2052	6.68335	4.54321	6.14645	0.451016	-1.14875	down
GO:0071222	cellular response to lipopolysaccharide	biological_process	8	0.037377	ENSRNOG00000022242	Cxcl9	C-X-C motif chemokine ligand 9 [Source:RGD Symbol;Acc:628798]	6.90616	5.99513	4.70513	2.639	3.00671	2.71353	2.10622	1.07466	up
GO:0071222	cellular response to lipopolysaccharide	biological_process	8	0.037377	ENSRNOG00000024899	Cxcl13	C-X-C motif chemokine ligand 13 [Source:RGD Symbol;Acc:1564256]	0.505115	0.912997	2.0192	4.23093	3.68046	3.58254	0.299054	-1.74152	down
GO:0060325	face morphogenesis	biological_process	5	0.0385587	ENSRNOG00000003897	Col1a1	collagen type I alpha 1 chain [Source:RGD Symbol;Acc:61817]	21.9343	20.0594	21.0288	58.1167	63.4283	51.677	0.363825	-1.45869	down
GO:0060325	face morphogenesis	biological_process	5	0.0385587	ENSRNOG00000016695	Mmp2	matrix metallopeptidase 2 [Source:RGD Symbol;Acc:621316]	30.7938	26.2646	32.2348	67.5082	55.093	74.8328	0.452269	-1.14475	down
GO:0034614	cellular response to reactive oxygen species	biological_process	7	0.0385587	ENSRNOG00000003580	Ucp1	uncoupling protein 1 [Source:RGD Symbol;Acc:3931]	0	0	0	0	0	12.6582	2.37001e-05	-15.3647	down
GO:0034614	cellular response to reactive oxygen species	biological_process	7	0.0385587	ENSRNOG00000016695	Mmp2	matrix metallopeptidase 2 [Source:RGD Symbol;Acc:621316]	30.7938	26.2646	32.2348	67.5082	55.093	74.8328	0.452269	-1.14475	down
GO:0060135	maternal process involved in female pregnancy	biological_process	5	0.0385587	ENSRNOG00000013304	Arg1	arginase 1 [Source:RGD Symbol;Acc:2150]	14.1945	11.7175	9.74681	5.09255	6.15658	5.0671	2.18549	1.12795	up
GO:0060135	maternal process involved in female pregnancy	biological_process	5	0.0385587	ENSRNOG00000016696	Angpt2	angiopoietin 2 [Source:RGD Symbol;Acc:621861]	3.01199	2.77709	3.05503	7.45684	6.76239	7.96137	0.398732	-1.32651	down
GO:0001958	endochondral ossification	biological_process	6	0.0385587	ENSRNOG00000000700	Tmem119	transmembrane protein 119 [Source:RGD Symbol;Acc:1307573]	6.59079	6.90106	6.28528	11.3215	14.3882	15.1594	0.483913	-1.04718	down
GO:0001958	endochondral ossification	biological_process	6	0.0385587	ENSRNOG00000003897	Col1a1	collagen type I alpha 1 chain [Source:RGD Symbol;Acc:61817]	21.9343	20.0594	21.0288	58.1167	63.4283	51.677	0.363825	-1.45869	down
GO:0005178	integrin binding	molecular_function	6	0.0388486	ENSRNOG00000003357	Col3a1	collagen type III alpha 1 chain [Source:RGD Symbol;Acc:71029]	156.474	148.568	159.465	332.712	580.742	362.723	0.363983	-1.45806	down
GO:0005178	integrin binding	molecular_function	6	0.0388486	ENSRNOG00000004649	Il1b	interleukin 1 beta [Source:RGD Symbol;Acc:2891]	20.4545	17.8629	26.638	9.01274	9.02768	13.4852	2.0604	1.04293	up
GO:0005178	integrin binding	molecular_function	6	0.0388486	ENSRNOG00000008816	Gpnmb	glycoprotein nmb [Source:RGD Symbol;Acc:71008]	194.008	146.217	143.748	84.0387	88.9556	65.1415	2.03234	1.02314	up
GO:0005178	integrin binding	molecular_function	6	0.0388486	ENSRNOG00000014524	S1pr3	sphingosine-1-phosphate receptor 3 [Source:RGD Symbol;Acc:1583843]	9.98579	9.09143	8.73488	22.3581	16.5395	25.1183	0.434456	-1.20272	down
GO:0012505	endomembrane system	cellular_component	4	0.0399921	ENSRNOG00000017226	Slc2a4	solute carrier family 2 member 4 [Source:RGD Symbol;Acc:2711]	0.725115	0.747971	0.866538	1.38289	1.35574	3.8632	0.35439	-1.49659	down
GO:0012505	endomembrane system	cellular_component	4	0.0399921	ENSRNOG00000020904	Cdc42ep2	CDC42 effector protein 2 [Source:RGD Symbol;Acc:1310253]	16.1048	13.5876	19.8116	27.6602	36.9112	34.8229	0.498057	-1.00562	down
GO:0012505	endomembrane system	cellular_component	4	0.0399921	ENSRNOG00000022239	Trarg1	trafficking regulator of GLUT4 (SLC2A4) 1 [Source:RGD Symbol;Acc:1307639]	2.12065	2.24179	2.81453	5.40766	4.54121	9.15362	0.375708	-1.41232	down
GO:0060070	canonical Wnt signaling pathway	biological_process	8	0.0399921	ENSRNOG00000007765	Frzb	frizzled-related protein [Source:RGD Symbol;Acc:1311315]	0.835247	1.32762	1.13202	2.30154	1.72858	2.68979	0.490317	-1.02821	down
GO:0060070	canonical Wnt signaling pathway	biological_process	8	0.0399921	ENSRNOG00000015618	Wnt5a	Wnt family member 5A [Source:RGD Symbol;Acc:69250]	3.0348	2.5955	2.2052	6.68335	4.54321	6.14645	0.451016	-1.14875	down
GO:0060070	canonical Wnt signaling pathway	biological_process	8	0.0399921	ENSRNOG00000025120	Gli1	GLI family zinc finger 1 [Source:RGD Symbol;Acc:621673]	0.698325	0.477126	0.544131	1.56395	1.68971	1.52278	0.360013	-1.47388	down
GO:0006904	vesicle docking involved in exocytosis	biological_process	7	0.0413211	ENSRNOG00000008001	Rab3b	RAB3B, member RAS oncogene family [Source:RGD Symbol;Acc:620922]	2.76153	1.88236	3.18417	4.52952	5.74434	6.11997	0.4775	-1.06643	down
GO:0006904	vesicle docking involved in exocytosis	biological_process	7	0.0413211	ENSRNOG00000055103	Cftr	cystic fibrosis transmembrane conductance regulator [Source:RGD Symbol;Acc:2332]	1.14851	0.941143	0.718715	2.41175	2.46834	1.29678	0.454659	-1.13714	down
GO:0042755	eating behavior	biological_process	5	0.0413211	ENSRNOG00000012674	Adrb3	adrenoceptor beta 3 [Source:RGD Symbol;Acc:2061]	0	0	0	0.089852	0.041841	1.01731	0.000261096	-11.9031	down
GO:0042755	eating behavior	biological_process	5	0.0413211	ENSRNOG00000045797	Lep	leptin [Source:RGD Symbol;Acc:3000]	0.038354	0.031345	0.037116	0.113483	0.270256	1.22499	0.0663972	-3.91273	down
GO:0014068	positive regulation of phosphatidylinositol 3-kinase signaling	biological_process	10	0.0415998	ENSRNOG00000014248	Erbb4	erb-b2 receptor tyrosine kinase 4 [Source:RGD Symbol;Acc:620486]	0.602772	0.820792	0.860173	0.247666	0.295959	0.240493	2.91249	1.54225	up
GO:0014068	positive regulation of phosphatidylinositol 3-kinase signaling	biological_process	10	0.0415998	ENSRNOG00000045797	Lep	leptin [Source:RGD Symbol;Acc:3000]	0.038354	0.031345	0.037116	0.113483	0.270256	1.22499	0.0663972	-3.91273	down
GO:0014068	positive regulation of phosphatidylinositol 3-kinase signaling	biological_process	10	0.0415998	ENSRNOG00000053232	Ror2	receptor tyrosine kinase-like orphan receptor 2 [Source:RGD Symbol;Acc:1305275]	0.93753	0.843785	1.20048	2.20838	2.23265	2.21271	0.448138	-1.15799	down
GO:0071277	cellular response to calcium ion	biological_process	8	0.0432396	ENSRNOG00000015618	Wnt5a	Wnt family member 5A [Source:RGD Symbol;Acc:69250]	3.0348	2.5955	2.2052	6.68335	4.54321	6.14645	0.451016	-1.14875	down
GO:0071277	cellular response to calcium ion	biological_process	8	0.0432396	ENSRNOG00000019163	Syt6	synaptotagmin 6 [Source:RGD Symbol;Acc:62012]	0.1703	0.178842	0.252158	0.527108	0.644704	0.817466	0.30227	-1.72609	down
GO:0071277	cellular response to calcium ion	biological_process	8	0.0432396	ENSRNOG00000026577	Cpne4	copine 4 [Source:RGD Symbol;Acc:1308844]	0	0.031358	0	0.111452	0.096857	0.268529	0.0657624	-3.92659	down
GO:0045880	positive regulation of smoothened signaling pathway	biological_process	9	0.0441556	ENSRNOG00000010617	Scube1	signal peptide, CUB domain and EGF like domain containing 1 [Source:RGD Symbol;Acc:1309015]	1.45564	1.53436	2.27365	3.64137	2.98263	4.25135	0.483999	-1.04692	down
GO:0045880	positive regulation of smoothened signaling pathway	biological_process	9	0.0441556	ENSRNOG00000025120	Gli1	GLI family zinc finger 1 [Source:RGD Symbol;Acc:621673]	0.698325	0.477126	0.544131	1.56395	1.68971	1.52278	0.360013	-1.47388	down
GO:0051781	positive regulation of cell division	biological_process	7	0.0441556	ENSRNOG00000004649	Il1b	interleukin 1 beta [Source:RGD Symbol;Acc:2891]	20.4545	17.8629	26.638	9.01274	9.02768	13.4852	2.0604	1.04293	up
GO:0051781	positive regulation of cell division	biological_process	7	0.0441556	ENSRNOG00000005650	Pgf	placental growth factor [Source:RGD Symbol;Acc:619850]	1.81335	1.74628	1.74662	2.71735	7.21811	5.43133	0.345306	-1.53405	down
GO:0035774	positive regulation of insulin secretion involved in cellular response to glucose stimulus	biological_process	12	0.0441556	ENSRNOG00000005345	Vsnl1	visinin-like 1 [Source:RGD Symbol;Acc:3966]	3.32119	2.25945	2.2958	5.8539	5.06962	5.59122	0.476934	-1.06814	down
GO:0035774	positive regulation of insulin secretion involved in cellular response to glucose stimulus	biological_process	12	0.0441556	ENSRNOG00000055103	Cftr	cystic fibrosis transmembrane conductance regulator [Source:RGD Symbol;Acc:2332]	1.14851	0.941143	0.718715	2.41175	2.46834	1.29678	0.454659	-1.13714	down
GO:0033209	tumor necrosis factor-mediated signaling pathway	biological_process	7	0.04706	ENSRNOG00000006200	St18	ST18 C2H2C-type zinc finger transcription factor [Source:RGD Symbol;Acc:708566]	0.0769487	0.146815	0.116223	0.389868	0.323476	0.228701	0.360903	-1.47032	down
GO:0033209	tumor necrosis factor-mediated signaling pathway	biological_process	7	0.04706	ENSRNOG00000047367	Card14	caspase recruitment domain family, member 14 [Source:RGD Symbol;Acc:1591135]	5.46672	4.5317	4.79579	2.63631	2.92656	1.73583	2.02697	1.01932	up
GO:0072593	reactive oxygen species metabolic process	biological_process	5	0.04706	ENSRNOG00000009565	Pdk4	pyruvate dehydrogenase kinase 4 [Source:RGD Symbol;Acc:69061]	4.36221	3.78789	4.40906	9.63669	7.51304	17.2593	0.364996	-1.45405	down
GO:0072593	reactive oxygen species metabolic process	biological_process	5	0.04706	ENSRNOG00000033348	Duox1	dual oxidase 1 [Source:RGD Symbol;Acc:628760]	4.03322	2.15876	3.55853	1.38054	1.11797	1.15612	2.668	1.41576	up
GO:0030010	establishment of cell polarity	biological_process	5	0.04706	ENSRNOG00000007865	Ephb1	Eph receptor B1 [Source:RGD Symbol;Acc:2556]	0.836464	0.793073	1.14742	0.471882	0.398737	0.218471	2.5498	1.35038	up
GO:0030010	establishment of cell polarity	biological_process	5	0.04706	ENSRNOG00000028624	Kif26b	kinesin family member 26B [Source:RGD Symbol;Acc:1560022]	0.695709	0.761429	1.28819	2.71739	2.06267	2.08559	0.399863	-1.32242	down
GO:0099699	integral component of synaptic membrane	cellular_component	7	0.0471399	ENSRNOG00000019163	Syt6	synaptotagmin 6 [Source:RGD Symbol;Acc:62012]	0.1703	0.178842	0.252158	0.527108	0.644704	0.817466	0.30227	-1.72609	down
GO:0046882	negative regulation of follicle-stimulating hormone secretion	biological_process	10	0.0471399	ENSRNOG00000011631	Fst	follistatin [Source:RGD Symbol;Acc:2633]	3.03205	2.47665	3.75114	7.03347	7.00825	7.06256	0.438766	-1.18848	down
GO:0032400	melanosome localization	biological_process	8	0.0471399	ENSRNOG00000015774	Mreg	melanoregulin [Source:RGD Symbol;Acc:1562333]	0.826137	1.91827	1.79114	0.453484	0.431069	0.6671	2.92304	1.54747	up
GO:0072574	hepatocyte proliferation	biological_process	6	0.0471399	ENSRNOG00000010714	Fgl1	fibrinogen-like 1 [Source:RGD Symbol;Acc:620169]	0.921761	1.10377	0.860493	0.23436	0.488145	0.319112	2.77071	1.47026	up
GO:0042304	regulation of fatty acid biosynthetic process	biological_process	9	0.0471399	ENSRNOG00000009565	Pdk4	pyruvate dehydrogenase kinase 4 [Source:RGD Symbol;Acc:69061]	4.36221	3.78789	4.40906	9.63669	7.51304	17.2593	0.364996	-1.45405	down
GO:0150077	regulation of neuroinflammatory response	biological_process	9	0.0471399	ENSRNOG00000002046	Cd200r1l	CD200 receptor 1-like [Source:RGD Symbol;Acc:1563387]	5.77038	3.90674	4.22352	2.19257	2.47716	1.07152	2.42119	1.27572	up
GO:0060907	positive regulation of macrophage cytokine production	biological_process	9	0.0471399	ENSRNOG00000015618	Wnt5a	Wnt family member 5A [Source:RGD Symbol;Acc:69250]	3.0348	2.5955	2.2052	6.68335	4.54321	6.14645	0.451016	-1.14875	down
GO:0071219	cellular response to molecule of bacterial origin	biological_process	7	0.0471399	ENSRNOG00000015618	Wnt5a	Wnt family member 5A [Source:RGD Symbol;Acc:69250]	3.0348	2.5955	2.2052	6.68335	4.54321	6.14645	0.451016	-1.14875	down
GO:0051380	norepinephrine binding	molecular_function	6	0.0471399	ENSRNOG00000012674	Adrb3	adrenoceptor beta 3 [Source:RGD Symbol;Acc:2061]	0	0	0	0.089852	0.041841	1.01731	0.000261096	-11.9031	down
GO:0034186	apolipoprotein A-I binding	molecular_function	6	0.0471399	ENSRNOG00000013578	Trem2	triggering receptor expressed on myeloid cells 2 [Source:RGD Symbol;Acc:1309841]	10.8948	5.01708	5.6079	3.19457	3.44342	4.12088	2.00019	1.00014	up
GO:0008595	anterior/posterior axis specification, embryo	biological_process	7	0.0471399	ENSRNOG00000015618	Wnt5a	Wnt family member 5A [Source:RGD Symbol;Acc:69250]	3.0348	2.5955	2.2052	6.68335	4.54321	6.14645	0.451016	-1.14875	down
GO:0010888	negative regulation of lipid storage	biological_process	6	0.0471399	ENSRNOG00000045797	Lep	leptin [Source:RGD Symbol;Acc:3000]	0.038354	0.031345	0.037116	0.113483	0.270256	1.22499	0.0663972	-3.91273	down
GO:0072050	S-shaped body morphogenesis	biological_process	5	0.0471399	ENSRNOG00000026203	Pax8	paired box 8 [Source:RGD Symbol;Acc:620434]	0.878829	0.821269	0.820972	0.21796	0.383172	0.130189	3.44728	1.78546	up
GO:0032280	symmetric synapse	cellular_component	5	0.0471399	ENSRNOG00000008943	Penk	proenkephalin [Source:RGD Symbol;Acc:68946]	1.132	1.55783	3.43566	0.621514	0.959967	0.863637	2.50519	1.32492	up
GO:0046546	development of primary male sexual characteristics	biological_process	6	0.0471399	ENSRNOG00000015618	Wnt5a	Wnt family member 5A [Source:RGD Symbol;Acc:69250]	3.0348	2.5955	2.2052	6.68335	4.54321	6.14645	0.451016	-1.14875	down
GO:2000491	positive regulation of hepatic stellate cell activation	biological_process	8	0.0471399	ENSRNOG00000045797	Lep	leptin [Source:RGD Symbol;Acc:3000]	0.038354	0.031345	0.037116	0.113483	0.270256	1.22499	0.0663972	-3.91273	down
GO:0006929	substrate-dependent cell migration	biological_process	7	0.0471399	ENSRNOG00000006723	Itga11	integrin subunit alpha 11 [Source:RGD Symbol;Acc:1311711]	0.445333	0.566447	0.898136	1.71316	1.51553	1.32386	0.419528	-1.25316	down
GO:2000481	positive regulation of cAMP-dependent protein kinase activity	biological_process	13	0.0471399	ENSRNOG00000001821	Adipoq	adiponectin, C1Q and collagen domain containing [Source:RGD Symbol;Acc:628748]	0.269142	0.528074	0.422021	2.31808	1.93395	13.321	0.0693811	-3.84931	down
GO:0072289	metanephric nephron tubule formation	biological_process	9	0.0471399	ENSRNOG00000026203	Pax8	paired box 8 [Source:RGD Symbol;Acc:620434]	0.878829	0.821269	0.820972	0.21796	0.383172	0.130189	3.44728	1.78546	up
GO:0008366	axon ensheathment	biological_process	5	0.0471399	ENSRNOG00000010263	Cldn11	claudin 11 [Source:RGD Symbol;Acc:71081]	2.68847	2.864	2.8561	5.43847	8.61906	7.68507	0.386732	-1.37059	down
GO:0097224	sperm connecting piece	cellular_component	5	0.0471399	ENSRNOG00000014505	Pmfbp1	polyamine modulated factor 1 binding protein 1 [Source:RGD Symbol;Acc:621677]	0.207092	0.0446111	0.0577034	0.524531	0.285313	0.497091	0.236742	-2.07861	down
GO:0071651	positive regulation of chemokine (C-C motif) ligand 5 production	biological_process	9	0.0471399	ENSRNOG00000015089	Mcoln2	mucolipin 2 [Source:RGD Symbol;Acc:1308884]	7.1303	6.82353	5.88089	3.61028	2.8491	3.26985	2.03867	1.02763	up
GO:0035624	receptor transactivation	biological_process	10	0.0471399	ENSRNOG00000013887	Adra2b	adrenoceptor alpha 2B [Source:RGD Symbol;Acc:2057]	0.311704	0.246273	0.182689	0.886988	0.676955	1.17461	0.270458	-1.88652	down
GO:0021889	olfactory bulb interneuron differentiation	biological_process	9	0.0471399	ENSRNOG00000014248	Erbb4	erb-b2 receptor tyrosine kinase 4 [Source:RGD Symbol;Acc:620486]	0.602772	0.820792	0.860173	0.247666	0.295959	0.240493	2.91249	1.54225	up
GO:0072221	metanephric distal convoluted tubule development	biological_process	9	0.0471399	ENSRNOG00000026203	Pax8	paired box 8 [Source:RGD Symbol;Acc:620434]	0.878829	0.821269	0.820972	0.21796	0.383172	0.130189	3.44728	1.78546	up
GO:0086006	voltage-gated sodium channel activity involved in cardiac muscle cell action potential	molecular_function	10	0.0471399	ENSRNOG00000057221	Scn3b	sodium voltage-gated channel beta subunit 3 [Source:RGD Symbol;Acc:621657]	21.0976	17.1091	25.2416	51.1686	32.1861	48.604	0.480819	-1.05643	down
GO:1900015	regulation of cytokine production involved in inflammatory response	biological_process	7	0.0471399	ENSRNOG00000045797	Lep	leptin [Source:RGD Symbol;Acc:3000]	0.038354	0.031345	0.037116	0.113483	0.270256	1.22499	0.0663972	-3.91273	down
GO:0038064	collagen receptor activity	molecular_function	6	0.0471399	ENSRNOG00000006723	Itga11	integrin subunit alpha 11 [Source:RGD Symbol;Acc:1311711]	0.445333	0.566447	0.898136	1.71316	1.51553	1.32386	0.419528	-1.25316	down
GO:0010739	positive regulation of protein kinase A signaling	biological_process	10	0.0471399	ENSRNOG00000001821	Adipoq	adiponectin, C1Q and collagen domain containing [Source:RGD Symbol;Acc:628748]	0.269142	0.528074	0.422021	2.31808	1.93395	13.321	0.0693811	-3.84931	down
GO:0072108	positive regulation of mesenchymal to epithelial transition involved in metanephros morphogenesis	biological_process	10	0.0471399	ENSRNOG00000026203	Pax8	paired box 8 [Source:RGD Symbol;Acc:620434]	0.878829	0.821269	0.820972	0.21796	0.383172	0.130189	3.44728	1.78546	up
GO:0035242	protein-arginine omega-N asymmetric methyltransferase activity	molecular_function	9	0.0471399	ENSRNOG00000053804	Prmt8	protein arginine methyltransferase 8 [Source:RGD Symbol;Acc:1587677]	0.332504	0.569915	0.192181	0.028857	0	0.008121	29.6014	4.88759	up
GO:0060750	epithelial cell proliferation involved in mammary gland duct elongation	biological_process	6	0.0471399	ENSRNOG00000015618	Wnt5a	Wnt family member 5A [Source:RGD Symbol;Acc:69250]	3.0348	2.5955	2.2052	6.68335	4.54321	6.14645	0.451016	-1.14875	down
GO:0003056	regulation of vascular smooth muscle contraction	biological_process	10	0.0471399	ENSRNOG00000013887	Adra2b	adrenoceptor alpha 2B [Source:RGD Symbol;Acc:2057]	0.311704	0.246273	0.182689	0.886988	0.676955	1.17461	0.270458	-1.88652	down
GO:0072144	glomerular mesangial cell development	biological_process	7	0.0471399	ENSRNOG00000058039	Acta2	actin alpha 2, smooth muscle [Source:RGD Symbol;Acc:621676]	74.1844	84.8511	106.259	171.41	140.048	239.067	0.481892	-1.05322	down
GO:0090335	regulation of brown fat cell differentiation	biological_process	8	0.0471399	ENSRNOG00000045797	Lep	leptin [Source:RGD Symbol;Acc:3000]	0.038354	0.031345	0.037116	0.113483	0.270256	1.22499	0.0663972	-3.91273	down
GO:1904753	negative regulation of vascular associated smooth muscle cell migration	biological_process	10	0.0471399	ENSRNOG00000001821	Adipoq	adiponectin, C1Q and collagen domain containing [Source:RGD Symbol;Acc:628748]	0.269142	0.528074	0.422021	2.31808	1.93395	13.321	0.0693811	-3.84931	down
GO:0072604	interleukin-6 secretion	biological_process	12	0.0471399	ENSRNOG00000045797	Lep	leptin [Source:RGD Symbol;Acc:3000]	0.038354	0.031345	0.037116	0.113483	0.270256	1.22499	0.0663972	-3.91273	down
GO:0004185	serine-type carboxypeptidase activity	molecular_function	9	0.0471399	ENSRNOG00000009172	Cpvl	carboxypeptidase, vitellogenic-like [Source:RGD Symbol;Acc:1563609]	0.429546	0.839735	0.861303	1.33746	1.63038	2.02442	0.426778	-1.22844	down
GO:0008391	arachidonic acid monooxygenase activity	molecular_function	6	0.0471399	ENSRNOG00000019500	Cyp1a1	cytochrome P450, family 1, subfamily a, polypeptide 1 [Source:RGD Symbol;Acc:2458]	1.30617	2.01733	6.01601	22.1476	22.9681	33.3498	0.119027	-3.07064	down
GO:0019919	peptidyl-arginine methylation, to asymmetrical-dimethyl arginine	biological_process	14	0.0471399	ENSRNOG00000053804	Prmt8	protein arginine methyltransferase 8 [Source:RGD Symbol;Acc:1587677]	0.332504	0.569915	0.192181	0.028857	0	0.008121	29.6014	4.88759	up
GO:0072012	glomerulus vasculature development	biological_process	6	0.0471399	ENSRNOG00000016696	Angpt2	angiopoietin 2 [Source:RGD Symbol;Acc:621861]	3.01199	2.77709	3.05503	7.45684	6.76239	7.96137	0.398732	-1.32651	down
GO:0072207	metanephric epithelium development	biological_process	8	0.0471399	ENSRNOG00000026203	Pax8	paired box 8 [Source:RGD Symbol;Acc:620434]	0.878829	0.821269	0.820972	0.21796	0.383172	0.130189	3.44728	1.78546	up
GO:0060760	positive regulation of response to cytokine stimulus	biological_process	7	0.0471399	ENSRNOG00000015618	Wnt5a	Wnt family member 5A [Source:RGD Symbol;Acc:69250]	3.0348	2.5955	2.2052	6.68335	4.54321	6.14645	0.451016	-1.14875	down
GO:0006525	arginine metabolic process	biological_process	11	0.0471399	ENSRNOG00000013304	Arg1	arginase 1 [Source:RGD Symbol;Acc:2150]	14.1945	11.7175	9.74681	5.09255	6.15658	5.0671	2.18549	1.12795	up
GO:0018894	dibenzo-p-dioxin metabolic process	biological_process	6	0.0471399	ENSRNOG00000019500	Cyp1a1	cytochrome P450, family 1, subfamily a, polypeptide 1 [Source:RGD Symbol;Acc:2458]	1.30617	2.01733	6.01601	22.1476	22.9681	33.3498	0.119027	-3.07064	down
GO:0015189	L-lysine transmembrane transporter activity	molecular_function	7	0.0471399	ENSRNOG00000054438	LOC292543	similar to solute carrier family 7 (cationic amino acid transporter, y+ system), member 3 [Source:RGD Symbol;Acc:1565097]	0.528722	0.612372	0.29992	0.047019	0.128095	0.082842	5.58628	2.48189	up
GO:0042904	9-cis-retinoic acid biosynthetic process	biological_process	12	0.0471399	ENSRNOG00000019500	Cyp1a1	cytochrome P450, family 1, subfamily a, polypeptide 1 [Source:RGD Symbol;Acc:2458]	1.30617	2.01733	6.01601	22.1476	22.9681	33.3498	0.119027	-3.07064	down
GO:0046881	positive regulation of follicle-stimulating hormone secretion	biological_process	10	0.0471399	ENSRNOG00000045797	Lep	leptin [Source:RGD Symbol;Acc:3000]	0.038354	0.031345	0.037116	0.113483	0.270256	1.22499	0.0663972	-3.91273	down
GO:0060686	negative regulation of prostatic bud formation	biological_process	9	0.0471399	ENSRNOG00000015618	Wnt5a	Wnt family member 5A [Source:RGD Symbol;Acc:69250]	3.0348	2.5955	2.2052	6.68335	4.54321	6.14645	0.451016	-1.14875	down
GO:0010729	positive regulation of hydrogen peroxide biosynthetic process	biological_process	10	0.0471399	ENSRNOG00000018005	Duoxa1	dual oxidase maturation factor 1 [Source:RGD Symbol;Acc:1306601]	5.56049	2.15936	4.37417	1.58063	1.28771	1.77397	2.60517	1.38138	up
GO:0070741	response to interleukin-6	biological_process	7	0.0471399	ENSRNOG00000028616	Pck1	phosphoenolpyruvate carboxykinase 1 [Source:RGD Symbol;Acc:3267]	0.294123	0.258891	0.731558	1.09133	1.59168	18.8392	0.0596858	-4.06647	down
GO:0023024	MHC class I protein complex binding	molecular_function	6	0.0471399	ENSRNOG00000060246	Klrd1	killer cell lectin like receptor D1 [Source:RGD Symbol;Acc:2978]	13.655	21.5233	11.2525	7.56228	4.74204	9.73844	2.1064	1.07478	up
GO:0038108	negative regulation of appetite by leptin-mediated signaling pathway	biological_process	12	0.0471399	ENSRNOG00000045797	Lep	leptin [Source:RGD Symbol;Acc:3000]	0.038354	0.031345	0.037116	0.113483	0.270256	1.22499	0.0663972	-3.91273	down
GO:0005501	retinoid binding	molecular_function	6	0.0471399	ENSRNOG00000015850	Rbp7	retinol binding protein 7 [Source:RGD Symbol;Acc:1562168]	0.368875	0	0.152045	0.740986	0.763844	5.30875	0.0764532	-3.70928	down
GO:0099525	presynaptic dense core vesicle exocytosis	biological_process	11	0.0471399	ENSRNOG00000019163	Syt6	synaptotagmin 6 [Source:RGD Symbol;Acc:62012]	0.1703	0.178842	0.252158	0.527108	0.644704	0.817466	0.30227	-1.72609	down
GO:0015705	iodide transport	biological_process	9	0.0471399	ENSRNOG00000058692	Slc26a4	solute carrier family 26 member 4 [Source:RGD Symbol;Acc:3293]	2.67212	1.9953	1.15691	1.03707	0.715431	0.934049	2.16796	1.11634	up
GO:0010041	response to iron(III) ion	biological_process	8	0.0471399	ENSRNOG00000019500	Cyp1a1	cytochrome P450, family 1, subfamily a, polypeptide 1 [Source:RGD Symbol;Acc:2458]	1.30617	2.01733	6.01601	22.1476	22.9681	33.3498	0.119027	-3.07064	down
GO:2000503	positive regulation of natural killer cell chemotaxis	biological_process	10	0.0471399	ENSRNOG00000011984	Cxcl14	C-X-C motif chemokine ligand 14 [Source:RGD Symbol;Acc:1307406]	17.269	9.0063	14.8414	32.6124	37.6915	54.0632	0.330608	-1.59681	down
GO:0021545	cranial nerve development	biological_process	6	0.0471399	ENSRNOG00000007865	Ephb1	Eph receptor B1 [Source:RGD Symbol;Acc:2556]	0.836464	0.793073	1.14742	0.471882	0.398737	0.218471	2.5498	1.35038	up
GO:0046320	regulation of fatty acid oxidation	biological_process	9	0.0471399	ENSRNOG00000009565	Pdk4	pyruvate dehydrogenase kinase 4 [Source:RGD Symbol;Acc:69061]	4.36221	3.78789	4.40906	9.63669	7.51304	17.2593	0.364996	-1.45405	down
GO:0009812	flavonoid metabolic process	biological_process	5	0.0471399	ENSRNOG00000019500	Cyp1a1	cytochrome P450, family 1, subfamily a, polypeptide 1 [Source:RGD Symbol;Acc:2458]	1.30617	2.01733	6.01601	22.1476	22.9681	33.3498	0.119027	-3.07064	down
GO:0072606	interleukin-8 secretion	biological_process	12	0.0471399	ENSRNOG00000045797	Lep	leptin [Source:RGD Symbol;Acc:3000]	0.038354	0.031345	0.037116	0.113483	0.270256	1.22499	0.0663972	-3.91273	down
GO:1902725	negative regulation of satellite cell differentiation	biological_process	9	0.0471399	ENSRNOG00000007865	Ephb1	Eph receptor B1 [Source:RGD Symbol;Acc:2556]	0.836464	0.793073	1.14742	0.471882	0.398737	0.218471	2.5498	1.35038	up
GO:1904861	excitatory synapse assembly	biological_process	7	0.0471399	ENSRNOG00000008098	Lrrc4	leucine rich repeat containing 4 [Source:RGD Symbol;Acc:1560026]	2.17239	1.99758	2.53782	5.27277	4.10377	5.20253	0.460097	-1.11999	down
GO:0004445	inositol-polyphosphate 5-phosphatase activity	molecular_function	10	0.0471399	ENSRNOG00000019361	Inpp5j	inositol polyphosphate-5-phosphatase J [Source:RGD Symbol;Acc:620541]	0.506732	0.656187	0.933052	1.64089	1.20865	1.66385	0.46439	-1.10659	down
GO:0000064	L-ornithine transmembrane transporter activity	molecular_function	7	0.0471399	ENSRNOG00000054438	LOC292543	similar to solute carrier family 7 (cationic amino acid transporter, y+ system), member 3 [Source:RGD Symbol;Acc:1565097]	0.528722	0.612372	0.29992	0.047019	0.128095	0.082842	5.58628	2.48189	up
GO:0035360	positive regulation of peroxisome proliferator activated receptor signaling pathway	biological_process	9	0.0471399	ENSRNOG00000045797	Lep	leptin [Source:RGD Symbol;Acc:3000]	0.038354	0.031345	0.037116	0.113483	0.270256	1.22499	0.0663972	-3.91273	down
GO:0097119	postsynaptic density protein 95 clustering	biological_process	8	0.0471399	ENSRNOG00000008098	Lrrc4	leucine rich repeat containing 4 [Source:RGD Symbol;Acc:1560026]	2.17239	1.99758	2.53782	5.27277	4.10377	5.20253	0.460097	-1.11999	down
GO:0014051	gamma-aminobutyric acid secretion	biological_process	8	0.0471399	ENSRNOG00000011133	Trpc4	transient receptor potential cation channel, subfamily C, member 4 [Source:RGD Symbol;Acc:621276]	0.047885	0.130389	0.050748	0.258961	0.381343	0.332957	0.235314	-2.08734	down
GO:0034969	histone arginine methylation	biological_process	12	0.0471399	ENSRNOG00000053804	Prmt8	protein arginine methyltransferase 8 [Source:RGD Symbol;Acc:1587677]	0.332504	0.569915	0.192181	0.028857	0	0.008121	29.6014	4.88759	up
GO:0086015	SA node cell action potential	biological_process	8	0.0471399	ENSRNOG00000057221	Scn3b	sodium voltage-gated channel beta subunit 3 [Source:RGD Symbol;Acc:621657]	21.0976	17.1091	25.2416	51.1686	32.1861	48.604	0.480819	-1.05643	down
GO:1902723	negative regulation of skeletal muscle satellite cell proliferation	biological_process	9	0.0471399	ENSRNOG00000007865	Ephb1	Eph receptor B1 [Source:RGD Symbol;Acc:2556]	0.836464	0.793073	1.14742	0.471882	0.398737	0.218471	2.5498	1.35038	up
GO:0017076	purine nucleotide binding	molecular_function	6	0.0471399	ENSRNOG00000028616	Pck1	phosphoenolpyruvate carboxykinase 1 [Source:RGD Symbol;Acc:3267]	0.294123	0.258891	0.731558	1.09133	1.59168	18.8392	0.0596858	-4.06647	down
GO:0021914	negative regulation of smoothened signaling pathway involved in ventral spinal cord patterning	biological_process	10	0.0471399	ENSRNOG00000058243	Rfx8	RFX family member 8, lacking RFX DNA binding domain [Source:RGD Symbol;Acc:1560724]	1.31132	1.61976	1.44162	3.76829	2.57726	3.05152	0.465327	-1.10368	down
GO:0060351	cartilage development involved in endochondral bone morphogenesis	biological_process	7	0.0471399	ENSRNOG00000003897	Col1a1	collagen type I alpha 1 chain [Source:RGD Symbol;Acc:61817]	21.9343	20.0594	21.0288	58.1167	63.4283	51.677	0.363825	-1.45869	down
GO:0048248	CXCR3 chemokine receptor binding	molecular_function	9	0.0471399	ENSRNOG00000022242	Cxcl9	C-X-C motif chemokine ligand 9 [Source:RGD Symbol;Acc:628798]	6.90616	5.99513	4.70513	2.639	3.00671	2.71353	2.10622	1.07466	up
GO:0051454	intracellular pH elevation	biological_process	12	0.0471399	ENSRNOG00000055103	Cftr	cystic fibrosis transmembrane conductance regulator [Source:RGD Symbol;Acc:2332]	1.14851	0.941143	0.718715	2.41175	2.46834	1.29678	0.454659	-1.13714	down
GO:0090382	phagosome maturation	biological_process	6	0.0471399	ENSRNOG00000015774	Mreg	melanoregulin [Source:RGD Symbol;Acc:1562333]	0.826137	1.91827	1.79114	0.453484	0.431069	0.6671	2.92304	1.54747	up
GO:0071156	regulation of cell cycle arrest	biological_process	8	0.0471399	ENSRNOG00000016949	Slc25a33	solute carrier family 25 member 33 [Source:RGD Symbol;Acc:1583942]	12.7926	13.8239	16.3486	29.8604	28.5655	33.4012	0.467891	-1.09576	down
GO:0043507	positive regulation of JUN kinase activity	biological_process	13	0.0500324	ENSRNOG00000015618	Wnt5a	Wnt family member 5A [Source:RGD Symbol;Acc:69250]	3.0348	2.5955	2.2052	6.68335	4.54321	6.14645	0.451016	-1.14875	down
GO:0043507	positive regulation of JUN kinase activity	biological_process	13	0.0500324	ENSRNOG00000053232	Ror2	receptor tyrosine kinase-like orphan receptor 2 [Source:RGD Symbol;Acc:1305275]	0.93753	0.843785	1.20048	2.20838	2.23265	2.21271	0.448138	-1.15799	down
GO:0048856	anatomical structure development	biological_process	4	0.0500324	ENSRNOG00000004537	Rxrg	retinoid X receptor gamma [Source:RGD Symbol;Acc:620046]	1.28978	1.42628	2.23642	3.66221	2.84174	4.15561	0.464605	-1.10592	down
GO:0048856	anatomical structure development	biological_process	4	0.0500324	ENSRNOG00000053232	Ror2	receptor tyrosine kinase-like orphan receptor 2 [Source:RGD Symbol;Acc:1305275]	0.93753	0.843785	1.20048	2.20838	2.23265	2.21271	0.448138	-1.15799	down
GO:0043235	receptor complex	cellular_component	4	0.0510636	ENSRNOG00000007865	Ephb1	Eph receptor B1 [Source:RGD Symbol;Acc:2556]	0.836464	0.793073	1.14742	0.471882	0.398737	0.218471	2.5498	1.35038	up
GO:0043235	receptor complex	cellular_component	4	0.0510636	ENSRNOG00000012674	Adrb3	adrenoceptor beta 3 [Source:RGD Symbol;Acc:2061]	0	0	0	0.089852	0.041841	1.01731	0.000261096	-11.9031	down
GO:0043235	receptor complex	cellular_component	4	0.0510636	ENSRNOG00000014248	Erbb4	erb-b2 receptor tyrosine kinase 4 [Source:RGD Symbol;Acc:620486]	0.602772	0.820792	0.860173	0.247666	0.295959	0.240493	2.91249	1.54225	up
GO:0043235	receptor complex	cellular_component	4	0.0510636	ENSRNOG00000053232	Ror2	receptor tyrosine kinase-like orphan receptor 2 [Source:RGD Symbol;Acc:1305275]	0.93753	0.843785	1.20048	2.20838	2.23265	2.21271	0.448138	-1.15799	down
GO:0043235	receptor complex	cellular_component	4	0.0510636	ENSRNOG00000060246	Klrd1	killer cell lectin like receptor D1 [Source:RGD Symbol;Acc:2978]	13.655	21.5233	11.2525	7.56228	4.74204	9.73844	2.1064	1.07478	up
GO:0031966	mitochondrial membrane	cellular_component	5	0.0511431	ENSRNOG00000003580	Ucp1	uncoupling protein 1 [Source:RGD Symbol;Acc:3931]	0	0	0	0	0	12.6582	2.37001e-05	-15.3647	down
GO:0031966	mitochondrial membrane	cellular_component	5	0.0511431	ENSRNOG00000016949	Slc25a33	solute carrier family 25 member 33 [Source:RGD Symbol;Acc:1583942]	12.7926	13.8239	16.3486	29.8604	28.5655	33.4012	0.467891	-1.09576	down
GO:0031966	mitochondrial membrane	cellular_component	5	0.0511431	ENSRNOG00000046239	LOC100909612	mitochondrial brown fat uncoupling protein 1-like [Source:RGD Symbol;Acc:6502621]	0	0	0	0	0	5.27305	5.68931e-05	-14.1014	down
GO:0031966	mitochondrial membrane	cellular_component	5	0.0511431	ENSRNOG00000049351	Nat8l	N-acetyltransferase 8-like [Source:RGD Symbol;Acc:1305719]	0.414609	0.359825	0.569127	1.06015	0.774246	1.71601	0.378425	-1.40192	down
GO:0060326	cell chemotaxis	biological_process	6	0.0519139	ENSRNOG00000007865	Ephb1	Eph receptor B1 [Source:RGD Symbol;Acc:2556]	0.836464	0.793073	1.14742	0.471882	0.398737	0.218471	2.5498	1.35038	up
GO:0060326	cell chemotaxis	biological_process	6	0.0519139	ENSRNOG00000011984	Cxcl14	C-X-C motif chemokine ligand 14 [Source:RGD Symbol;Acc:1307406]	17.269	9.0063	14.8414	32.6124	37.6915	54.0632	0.330608	-1.59681	down
GO:0060326	cell chemotaxis	biological_process	6	0.0519139	ENSRNOG00000048239	Cxcr1	C-X-C motif chemokine receptor 1 [Source:RGD Symbol;Acc:2905]	16.0266	13.947	11.851	5.02716	3.39089	4.10572	3.33962	1.73968	up
GO:0046330	positive regulation of JNK cascade	biological_process	13	0.0519139	ENSRNOG00000004649	Il1b	interleukin 1 beta [Source:RGD Symbol;Acc:2891]	20.4545	17.8629	26.638	9.01274	9.02768	13.4852	2.0604	1.04293	up
GO:0046330	positive regulation of JNK cascade	biological_process	13	0.0519139	ENSRNOG00000014265	Tnfrsf19	TNF receptor superfamily member 19 [Source:RGD Symbol;Acc:1564996]	0.292562	0.18351	0.32382	1.07666	0.397136	0.799481	0.351867	-1.5069	down
GO:0046330	positive regulation of JNK cascade	biological_process	13	0.0519139	ENSRNOG00000015618	Wnt5a	Wnt family member 5A [Source:RGD Symbol;Acc:69250]	3.0348	2.5955	2.2052	6.68335	4.54321	6.14645	0.451016	-1.14875	down
GO:0050909	sensory perception of taste	biological_process	8	0.0530706	ENSRNOG00000005268	Gnat3	G protein subunit alpha transducin 3 [Source:RGD Symbol;Acc:727817]	1.06101	0.850564	1.51812	3.70113	2.49755	4.15072	0.331391	-1.5934	down
GO:0050909	sensory perception of taste	biological_process	8	0.0530706	ENSRNOG00000020484	Trpm5	transient receptor potential cation channel, subfamily M, member 5 [Source:RGD Symbol;Acc:1310620]	5.99927	5.86911	10.0597	17.4263	11.9153	18.1559	0.461669	-1.11507	down
GO:0007281	germ cell development	biological_process	5	0.0530706	ENSRNOG00000016696	Angpt2	angiopoietin 2 [Source:RGD Symbol;Acc:621861]	3.01199	2.77709	3.05503	7.45684	6.76239	7.96137	0.398732	-1.32651	down
GO:0007281	germ cell development	biological_process	5	0.0530706	ENSRNOG00000033209	Bmp8b	bone morphogenetic protein 8b [Source:RGD Symbol;Acc:1591873]	1.03207	1.66145	1.31074	0.262554	0.64986	0.54328	2.75076	1.45983	up
GO:0019003	GDP binding	molecular_function	8	0.0537423	ENSRNOG00000003580	Ucp1	uncoupling protein 1 [Source:RGD Symbol;Acc:3931]	0	0	0	0	0	12.6582	2.37001e-05	-15.3647	down
GO:0019003	GDP binding	molecular_function	8	0.0537423	ENSRNOG00000008001	Rab3b	RAB3B, member RAS oncogene family [Source:RGD Symbol;Acc:620922]	2.76153	1.88236	3.18417	4.52952	5.74434	6.11997	0.4775	-1.06643	down
GO:0019003	GDP binding	molecular_function	8	0.0537423	ENSRNOG00000028616	Pck1	phosphoenolpyruvate carboxykinase 1 [Source:RGD Symbol;Acc:3267]	0.294123	0.258891	0.731558	1.09133	1.59168	18.8392	0.0596858	-4.06647	down
GO:0016829	lyase activity	molecular_function	4	0.0552012	ENSRNOG00000010079	Ca3	carbonic anhydrase 3 [Source:RGD Symbol;Acc:2241]	2.52678	4.82757	3.94699	10.1675	12.1564	43.507	0.171672	-2.54227	down
GO:0016829	lyase activity	molecular_function	4	0.0552012	ENSRNOG00000014075	Clybl	citrate lyase beta like [Source:RGD Symbol;Acc:1304615]	0.568797	0.531304	0.471414	1.20744	1.2182	1.78419	0.373296	-1.42161	down
GO:0016829	lyase activity	molecular_function	4	0.0552012	ENSRNOG00000019500	Cyp1a1	cytochrome P450, family 1, subfamily a, polypeptide 1 [Source:RGD Symbol;Acc:2458]	1.30617	2.01733	6.01601	22.1476	22.9681	33.3498	0.119027	-3.07064	down
GO:0016829	lyase activity	molecular_function	4	0.0552012	ENSRNOG00000028616	Pck1	phosphoenolpyruvate carboxykinase 1 [Source:RGD Symbol;Acc:3267]	0.294123	0.258891	0.731558	1.09133	1.59168	18.8392	0.0596858	-4.06647	down
GO:0017147	Wnt-protein binding	molecular_function	5	0.0561728	ENSRNOG00000007765	Frzb	frizzled-related protein [Source:RGD Symbol;Acc:1311315]	0.835247	1.32762	1.13202	2.30154	1.72858	2.68979	0.490317	-1.02821	down
GO:0017147	Wnt-protein binding	molecular_function	5	0.0561728	ENSRNOG00000053232	Ror2	receptor tyrosine kinase-like orphan receptor 2 [Source:RGD Symbol;Acc:1305275]	0.93753	0.843785	1.20048	2.20838	2.23265	2.21271	0.448138	-1.15799	down
GO:0030282	bone mineralization	biological_process	7	0.0561728	ENSRNOG00000008816	Gpnmb	glycoprotein nmb [Source:RGD Symbol;Acc:71008]	194.008	146.217	143.748	84.0387	88.9556	65.1415	2.03234	1.02314	up
GO:0030282	bone mineralization	biological_process	7	0.0561728	ENSRNOG00000053232	Ror2	receptor tyrosine kinase-like orphan receptor 2 [Source:RGD Symbol;Acc:1305275]	0.93753	0.843785	1.20048	2.20838	2.23265	2.21271	0.448138	-1.15799	down
GO:0043473	pigmentation	biological_process	3	0.0561728	ENSRNOG00000014465	Oca2	OCA2 melanosomal transmembrane protein [Source:RGD Symbol;Acc:2318412]	0	0	0	0.101048	0.120925	0.079096	0.000996449	-9.97092	down
GO:0043473	pigmentation	biological_process	3	0.0561728	ENSRNOG00000015774	Mreg	melanoregulin [Source:RGD Symbol;Acc:1562333]	0.826137	1.91827	1.79114	0.453484	0.431069	0.6671	2.92304	1.54747	up
GO:0048706	embryonic skeletal system development	biological_process	7	0.0561728	ENSRNOG00000003897	Col1a1	collagen type I alpha 1 chain [Source:RGD Symbol;Acc:61817]	21.9343	20.0594	21.0288	58.1167	63.4283	51.677	0.363825	-1.45869	down
GO:0048706	embryonic skeletal system development	biological_process	7	0.0561728	ENSRNOG00000015618	Wnt5a	Wnt family member 5A [Source:RGD Symbol;Acc:69250]	3.0348	2.5955	2.2052	6.68335	4.54321	6.14645	0.451016	-1.14875	down
GO:0002250	adaptive immune response	biological_process	5	0.0574909	ENSRNOG00000010714	Fgl1	fibrinogen-like 1 [Source:RGD Symbol;Acc:620169]	0.921761	1.10377	0.860493	0.23436	0.488145	0.319112	2.77071	1.47026	up
GO:0002250	adaptive immune response	biological_process	5	0.0574909	ENSRNOG00000013304	Arg1	arginase 1 [Source:RGD Symbol;Acc:2150]	14.1945	11.7175	9.74681	5.09255	6.15658	5.0671	2.18549	1.12795	up
GO:0002250	adaptive immune response	biological_process	5	0.0574909	ENSRNOG00000030431	RT1-Db2	RT1 class II, locus Db2 [Source:RGD Symbol;Acc:1595922]	3.57562	1.76437	1.09238	0.503178	0.344361	1.19923	3.14269	1.652	up
GO:0032496	response to lipopolysaccharide	biological_process	7	0.0577192	ENSRNOG00000004649	Il1b	interleukin 1 beta [Source:RGD Symbol;Acc:2891]	20.4545	17.8629	26.638	9.01274	9.02768	13.4852	2.0604	1.04293	up
GO:0032496	response to lipopolysaccharide	biological_process	7	0.0577192	ENSRNOG00000008943	Penk	proenkephalin [Source:RGD Symbol;Acc:68946]	1.132	1.55783	3.43566	0.621514	0.959967	0.863637	2.50519	1.32492	up
GO:0032496	response to lipopolysaccharide	biological_process	7	0.0577192	ENSRNOG00000013304	Arg1	arginase 1 [Source:RGD Symbol;Acc:2150]	14.1945	11.7175	9.74681	5.09255	6.15658	5.0671	2.18549	1.12795	up
GO:0032496	response to lipopolysaccharide	biological_process	7	0.0577192	ENSRNOG00000019500	Cyp1a1	cytochrome P450, family 1, subfamily a, polypeptide 1 [Source:RGD Symbol;Acc:2458]	1.30617	2.01733	6.01601	22.1476	22.9681	33.3498	0.119027	-3.07064	down
GO:0032496	response to lipopolysaccharide	biological_process	7	0.0577192	ENSRNOG00000028616	Pck1	phosphoenolpyruvate carboxykinase 1 [Source:RGD Symbol;Acc:3267]	0.294123	0.258891	0.731558	1.09133	1.59168	18.8392	0.0596858	-4.06647	down
GO:0045087	innate immune response	biological_process	5	0.0583037	ENSRNOG00000013304	Arg1	arginase 1 [Source:RGD Symbol;Acc:2150]	14.1945	11.7175	9.74681	5.09255	6.15658	5.0671	2.18549	1.12795	up
GO:0045087	innate immune response	biological_process	5	0.0583037	ENSRNOG00000014918	Klrg1	killer cell lectin like receptor G1 [Source:RGD Symbol;Acc:61978]	4.26076	7.30657	3.73	2.21767	1.5166	3.17449	2.21419	1.14678	up
GO:0045087	innate immune response	biological_process	5	0.0583037	ENSRNOG00000030332	Ighg1	immunoglobulin heavy constant gamma 1 [Source:RGD Symbol;Acc:1359539]	5.53172	6.5237	33.722	1.9498	0.877678	2.30912	8.91201	3.15575	up
GO:0045087	innate immune response	biological_process	5	0.0583037	ENSRNOG00000042319	AABR07065814		6.68222	8.72294	9.77249	5.32954	2.55509	3.63014	2.18655	1.12866	up
GO:0045087	innate immune response	biological_process	5	0.0583037	ENSRNOG00000042569	AABR07065811		9.52239	7.43076	3.45214	1.05548	0.953026	2.96165	4.10556	2.03758	up
GO:0045087	innate immune response	biological_process	5	0.0583037	ENSRNOG00000048159	AABR07065778		6.58067	1.09822	4.45755	0.512362	0.399594	1.25736	5.5946	2.48403	up
GO:0004309	exopolyphosphatase activity	molecular_function	8	0.0585751	ENSRNOG00000015088	Prune2	prune homolog 2 with BCH domain [Source:RGD Symbol;Acc:1311350]	4.81171	6.16491	6.22443	16.203	8.79714	20.9274	0.374526	-1.41686	down
GO:0045650	negative regulation of macrophage differentiation	biological_process	10	0.0585751	ENSRNOG00000001821	Adipoq	adiponectin, C1Q and collagen domain containing [Source:RGD Symbol;Acc:628748]	0.269142	0.528074	0.422021	2.31808	1.93395	13.321	0.0693811	-3.84931	down
GO:0048515	spermatid differentiation	biological_process	5	0.0585751	ENSRNOG00000000700	Tmem119	transmembrane protein 119 [Source:RGD Symbol;Acc:1307573]	6.59079	6.90106	6.28528	11.3215	14.3882	15.1594	0.483913	-1.04718	down
GO:0004331	fructose-2,6-bisphosphate 2-phosphatase activity	molecular_function	10	0.0585751	ENSRNOG00000018911	Pfkfb3	6-phosphofructo-2-kinase/fructose-2,6-biphosphatase 3 [Source:RGD Symbol;Acc:619776]	19.8305	24.4373	25.5297	38.5041	62.3266	54.9695	0.447993	-1.15845	down
GO:0048570	notochord morphogenesis	biological_process	7	0.0585751	ENSRNOG00000015618	Wnt5a	Wnt family member 5A [Source:RGD Symbol;Acc:69250]	3.0348	2.5955	2.2052	6.68335	4.54321	6.14645	0.451016	-1.14875	down
GO:0071813	lipoprotein particle binding	molecular_function	6	0.0585751	ENSRNOG00000013578	Trem2	triggering receptor expressed on myeloid cells 2 [Source:RGD Symbol;Acc:1309841]	10.8948	5.01708	5.6079	3.19457	3.44342	4.12088	2.00019	1.00014	up
GO:0003873	6-phosphofructo-2-kinase activity	molecular_function	8	0.0585751	ENSRNOG00000018911	Pfkfb3	6-phosphofructo-2-kinase/fructose-2,6-biphosphatase 3 [Source:RGD Symbol;Acc:619776]	19.8305	24.4373	25.5297	38.5041	62.3266	54.9695	0.447993	-1.15845	down
GO:0060373	regulation of ventricular cardiac muscle cell membrane depolarization	biological_process	7	0.0585751	ENSRNOG00000057221	Scn3b	sodium voltage-gated channel beta subunit 3 [Source:RGD Symbol;Acc:621657]	21.0976	17.1091	25.2416	51.1686	32.1861	48.604	0.480819	-1.05643	down
GO:0071918	urea transmembrane transport	biological_process	9	0.0585751	ENSRNOG00000009686	Aqp7	aquaporin 7 [Source:RGD Symbol;Acc:2145]	0.04156	0.071983	0.079689	0.169014	0.259968	3.27253	0.0522035	-4.25971	down
GO:2000987	positive regulation of behavioral fear response	biological_process	9	0.0585751	ENSRNOG00000008943	Penk	proenkephalin [Source:RGD Symbol;Acc:68946]	1.132	1.55783	3.43566	0.621514	0.959967	0.863637	2.50519	1.32492	up
GO:0002322	B cell proliferation involved in immune response	biological_process	9	0.0585751	ENSRNOG00000026989	Gapt	Grb2-binding adaptor protein, transmembrane [Source:RGD Symbol;Acc:1586621]	0.952751	1.66357	1.71694	0.780461	0.541978	0.649122	2.19788	1.13611	up
GO:0031017	exocrine pancreas development	biological_process	7	0.0585751	ENSRNOG00000004725	Cela1	chymotrypsin like elastase 1 [Source:RGD Symbol;Acc:2547]	25.6612	19.6849	15.4892	7.22067	12.5953	7.85221	2.19875	1.13668	up
GO:0030213	hyaluronan biosynthetic process	biological_process	9	0.0585751	ENSRNOG00000004649	Il1b	interleukin 1 beta [Source:RGD Symbol;Acc:2891]	20.4545	17.8629	26.638	9.01274	9.02768	13.4852	2.0604	1.04293	up
GO:0048639	positive regulation of developmental growth	biological_process	7	0.0585751	ENSRNOG00000045797	Lep	leptin [Source:RGD Symbol;Acc:3000]	0.038354	0.031345	0.037116	0.113483	0.270256	1.22499	0.0663972	-3.91273	down
GO:2000052	positive regulation of non-canonical Wnt signaling pathway	biological_process	10	0.0585751	ENSRNOG00000015618	Wnt5a	Wnt family member 5A [Source:RGD Symbol;Acc:69250]	3.0348	2.5955	2.2052	6.68335	4.54321	6.14645	0.451016	-1.14875	down
GO:0006778	porphyrin-containing compound metabolic process	biological_process	7	0.0585751	ENSRNOG00000019500	Cyp1a1	cytochrome P450, family 1, subfamily a, polypeptide 1 [Source:RGD Symbol;Acc:2458]	1.30617	2.01733	6.01601	22.1476	22.9681	33.3498	0.119027	-3.07064	down
GO:0070988	demethylation	biological_process	4	0.0585751	ENSRNOG00000019500	Cyp1a1	cytochrome P450, family 1, subfamily a, polypeptide 1 [Source:RGD Symbol;Acc:2458]	1.30617	2.01733	6.01601	22.1476	22.9681	33.3498	0.119027	-3.07064	down
GO:0072345	NAADP-sensitive calcium-release channel activity	molecular_function	10	0.0585751	ENSRNOG00000015089	Mcoln2	mucolipin 2 [Source:RGD Symbol;Acc:1308884]	7.1303	6.82353	5.88089	3.61028	2.8491	3.26985	2.03867	1.02763	up
GO:0048793	pronephros development	biological_process	7	0.0585751	ENSRNOG00000026203	Pax8	paired box 8 [Source:RGD Symbol;Acc:620434]	0.878829	0.821269	0.820972	0.21796	0.383172	0.130189	3.44728	1.78546	up
GO:0098639	collagen binding involved in cell-matrix adhesion	molecular_function	6	0.0585751	ENSRNOG00000006723	Itga11	integrin subunit alpha 11 [Source:RGD Symbol;Acc:1311711]	0.445333	0.566447	0.898136	1.71316	1.51553	1.32386	0.419528	-1.25316	down
GO:0004994	somatostatin receptor activity	molecular_function	8	0.0585751	ENSRNOG00000048145	Sstr1	somatostatin receptor 1 [Source:RGD Symbol;Acc:3762]	1.29021	1.61171	1.86831	0.504885	0.640927	0.601976	2.72929	1.44853	up
GO:0032308	positive regulation of prostaglandin secretion	biological_process	10	0.0585751	ENSRNOG00000004649	Il1b	interleukin 1 beta [Source:RGD Symbol;Acc:2891]	20.4545	17.8629	26.638	9.01274	9.02768	13.4852	2.0604	1.04293	up
GO:0015204	urea transmembrane transporter activity	molecular_function	6	0.0585751	ENSRNOG00000009686	Aqp7	aquaporin 7 [Source:RGD Symbol;Acc:2145]	0.04156	0.071983	0.079689	0.169014	0.259968	3.27253	0.0522035	-4.25971	down
GO:0045124	regulation of bone resorption	biological_process	8	0.0585751	ENSRNOG00000009565	Pdk4	pyruvate dehydrogenase kinase 4 [Source:RGD Symbol;Acc:69061]	4.36221	3.78789	4.40906	9.63669	7.51304	17.2593	0.364996	-1.45405	down
GO:0002729	positive regulation of natural killer cell cytokine production	biological_process	11	0.0585751	ENSRNOG00000051169	Clnk	cytokine-dependent hematopoietic cell linker [Source:RGD Symbol;Acc:1562417]	2.63507	7.08413	3.45371	1.51226	0.862768	2.10793	2.93844	1.55505	up
GO:0086012	membrane depolarization during cardiac muscle cell action potential	biological_process	8	0.0585751	ENSRNOG00000057221	Scn3b	sodium voltage-gated channel beta subunit 3 [Source:RGD Symbol;Acc:621657]	21.0976	17.1091	25.2416	51.1686	32.1861	48.604	0.480819	-1.05643	down
GO:0052658	inositol-1,4,5-trisphosphate 5-phosphatase activity	molecular_function	10	0.0585751	ENSRNOG00000019361	Inpp5j	inositol polyphosphate-5-phosphatase J [Source:RGD Symbol;Acc:620541]	0.506732	0.656187	0.933052	1.64089	1.20865	1.66385	0.46439	-1.10659	down
GO:0045836	positive regulation of meiotic nuclear division	biological_process	9	0.0585751	ENSRNOG00000015618	Wnt5a	Wnt family member 5A [Source:RGD Symbol;Acc:69250]	3.0348	2.5955	2.2052	6.68335	4.54321	6.14645	0.451016	-1.14875	down
GO:2000757	negative regulation of peptidyl-lysine acetylation	biological_process	11	0.0585751	ENSRNOG00000017808	Klf15	Kruppel-like factor 15 [Source:RGD Symbol;Acc:70918]	12.6054	16.1892	16.6218	32.3243	28.6913	33.7467	0.479266	-1.0611	down
GO:0015793	glycerol transport	biological_process	8	0.0585751	ENSRNOG00000009686	Aqp7	aquaporin 7 [Source:RGD Symbol;Acc:2145]	0.04156	0.071983	0.079689	0.169014	0.259968	3.27253	0.0522035	-4.25971	down
GO:0060336	negative regulation of interferon-gamma-mediated signaling pathway	biological_process	10	0.0585751	ENSRNOG00000013304	Arg1	arginase 1 [Source:RGD Symbol;Acc:2150]	14.1945	11.7175	9.74681	5.09255	6.15658	5.0671	2.18549	1.12795	up
GO:0048403	brain-derived neurotrophic factor binding	molecular_function	7	0.0585751	ENSRNOG00000006565	Fstl4	follistatin-like 4 [Source:RGD Symbol;Acc:1307227]	1.13651	0.735415	0.132085	0.200113	0.165783	0.097167	4.32773	2.11361	up
GO:0006798	polyphosphate catabolic process	biological_process	7	0.0585751	ENSRNOG00000015088	Prune2	prune homolog 2 with BCH domain [Source:RGD Symbol;Acc:1311350]	4.81171	6.16491	6.22443	16.203	8.79714	20.9274	0.374526	-1.41686	down
GO:0019222	regulation of metabolic process	biological_process	5	0.0585751	ENSRNOG00000045797	Lep	leptin [Source:RGD Symbol;Acc:3000]	0.038354	0.031345	0.037116	0.113483	0.270256	1.22499	0.0663972	-3.91273	down
GO:0008469	histone-arginine N-methyltransferase activity	molecular_function	9	0.0585751	ENSRNOG00000053804	Prmt8	protein arginine methyltransferase 8 [Source:RGD Symbol;Acc:1587677]	0.332504	0.569915	0.192181	0.028857	0	0.008121	29.6014	4.88759	up
GO:0032815	negative regulation of natural killer cell activation	biological_process	9	0.0585751	ENSRNOG00000051169	Clnk	cytokine-dependent hematopoietic cell linker [Source:RGD Symbol;Acc:1562417]	2.63507	7.08413	3.45371	1.51226	0.862768	2.10793	2.93844	1.55505	up
GO:2000467	positive regulation of glycogen (starch) synthase activity	biological_process	8	0.0585751	ENSRNOG00000001821	Adipoq	adiponectin, C1Q and collagen domain containing [Source:RGD Symbol;Acc:628748]	0.269142	0.528074	0.422021	2.31808	1.93395	13.321	0.0693811	-3.84931	down
GO:0060754	positive regulation of mast cell chemotaxis	biological_process	9	0.0585751	ENSRNOG00000005650	Pgf	placental growth factor [Source:RGD Symbol;Acc:619850]	1.81335	1.74628	1.74662	2.71735	7.21811	5.43133	0.345306	-1.53405	down
GO:1990635	proximal dendrite	cellular_component	7	0.0585751	ENSRNOG00000056697	Kcnab1	potassium voltage-gated channel subfamily A member regulatory beta subunit 1 [Source:RGD Symbol;Acc:61827]	3.31095	2.45264	1.755	1.07741	1.03743	1.28351	2.21242	1.14563	up
GO:2000556	positive regulation of T-helper 1 cell cytokine production	biological_process	12	0.0585751	ENSRNOG00000004649	Il1b	interleukin 1 beta [Source:RGD Symbol;Acc:2891]	20.4545	17.8629	26.638	9.01274	9.02768	13.4852	2.0604	1.04293	up
GO:0051798	positive regulation of hair follicle development	biological_process	8	0.0585751	ENSRNOG00000011631	Fst	follistatin [Source:RGD Symbol;Acc:2633]	3.03205	2.47665	3.75114	7.03347	7.00825	7.06256	0.438766	-1.18848	down
GO:0005594	collagen type IX trimer	cellular_component	6	0.0585751	ENSRNOG00000016177	Scara3	scavenger receptor class A, member 3 [Source:RGD Symbol;Acc:1309269]	5.49624	3.67234	4.02177	9.70825	9.66812	8.74041	0.469128	-1.09195	down
GO:0007016	cytoskeletal anchoring at plasma membrane	biological_process	7	0.0585751	ENSRNOG00000016724	Epb41l3	erythrocyte membrane protein band 4.1-like 3 [Source:RGD Symbol;Acc:71089]	0.323093	0.245497	0.361631	0.556784	0.869599	1.02498	0.37947	-1.39794	down
GO:0044323	retinoic acid-responsive element binding	molecular_function	11	0.0585751	ENSRNOG00000004537	Rxrg	retinoid X receptor gamma [Source:RGD Symbol;Acc:620046]	1.28978	1.42628	2.23642	3.66221	2.84174	4.15561	0.464605	-1.10592	down
GO:0033691	sialic acid binding	molecular_function	7	0.0585751	ENSRNOG00000001821	Adipoq	adiponectin, C1Q and collagen domain containing [Source:RGD Symbol;Acc:628748]	0.269142	0.528074	0.422021	2.31808	1.93395	13.321	0.0693811	-3.84931	down
GO:0034103	regulation of tissue remodeling	biological_process	6	0.0585751	ENSRNOG00000008816	Gpnmb	glycoprotein nmb [Source:RGD Symbol;Acc:71008]	194.008	146.217	143.748	84.0387	88.9556	65.1415	2.03234	1.02314	up
GO:0070245	positive regulation of thymocyte apoptotic process	biological_process	13	0.0585751	ENSRNOG00000015618	Wnt5a	Wnt family member 5A [Source:RGD Symbol;Acc:69250]	3.0348	2.5955	2.2052	6.68335	4.54321	6.14645	0.451016	-1.14875	down
GO:0043237	laminin-1 binding	molecular_function	6	0.0585751	ENSRNOG00000002461	Nid1	nidogen 1 [Source:RGD Symbol;Acc:3178]	7.0868	7.3753	8.23495	25.6053	16.1071	15.6315	0.395806	-1.33713	down
GO:1903401	L-lysine transmembrane transport	biological_process	8	0.0585751	ENSRNOG00000054438	LOC292543	similar to solute carrier family 7 (cationic amino acid transporter, y+ system), member 3 [Source:RGD Symbol;Acc:1565097]	0.528722	0.612372	0.29992	0.047019	0.128095	0.082842	5.58628	2.48189	up
GO:0042634	regulation of hair cycle	biological_process	6	0.0585751	ENSRNOG00000014448	Arntl	aryl hydrocarbon receptor nuclear translocator-like [Source:RGD Symbol;Acc:62003]	12.2717	9.27036	6.63534	7.09622	2.94619	3.24836	2.12007	1.08411	up
GO:0060762	regulation of branching involved in mammary gland duct morphogenesis	biological_process	8	0.0585751	ENSRNOG00000015618	Wnt5a	Wnt family member 5A [Source:RGD Symbol;Acc:69250]	3.0348	2.5955	2.2052	6.68335	4.54321	6.14645	0.451016	-1.14875	down
GO:1903140	regulation of establishment of endothelial barrier	biological_process	10	0.0585751	ENSRNOG00000004649	Il1b	interleukin 1 beta [Source:RGD Symbol;Acc:2891]	20.4545	17.8629	26.638	9.01274	9.02768	13.4852	2.0604	1.04293	up
GO:0030323	respiratory tube development	biological_process	6	0.0585751	ENSRNOG00000022970	Nkx2-8	NK2 homeobox 8 [Source:RGD Symbol;Acc:1310629]	3.07131	2.63652	1.18154	0.114957	0.539575	0.18753	8.18155	3.03237	up
GO:0038065	collagen-activated signaling pathway	biological_process	6	0.0585751	ENSRNOG00000006723	Itga11	integrin subunit alpha 11 [Source:RGD Symbol;Acc:1311711]	0.445333	0.566447	0.898136	1.71316	1.51553	1.32386	0.419528	-1.25316	down
GO:0018216	peptidyl-arginine methylation	biological_process	11	0.0585751	ENSRNOG00000053804	Prmt8	protein arginine methyltransferase 8 [Source:RGD Symbol;Acc:1587677]	0.332504	0.569915	0.192181	0.028857	0	0.008121	29.6014	4.88759	up
GO:0019871	sodium channel inhibitor activity	molecular_function	7	0.0585751	ENSRNOG00000057221	Scn3b	sodium voltage-gated channel beta subunit 3 [Source:RGD Symbol;Acc:621657]	21.0976	17.1091	25.2416	51.1686	32.1861	48.604	0.480819	-1.05643	down
GO:0060028	convergent extension involved in axis elongation	biological_process	8	0.0585751	ENSRNOG00000015618	Wnt5a	Wnt family member 5A [Source:RGD Symbol;Acc:69250]	3.0348	2.5955	2.2052	6.68335	4.54321	6.14645	0.451016	-1.14875	down
GO:0060744	mammary gland branching involved in thelarche	biological_process	5	0.0585751	ENSRNOG00000015618	Wnt5a	Wnt family member 5A [Source:RGD Symbol;Acc:69250]	3.0348	2.5955	2.2052	6.68335	4.54321	6.14645	0.451016	-1.14875	down
GO:2000323	negative regulation of glucocorticoid receptor signaling pathway	biological_process	10	0.0585751	ENSRNOG00000014448	Arntl	aryl hydrocarbon receptor nuclear translocator-like [Source:RGD Symbol;Acc:62003]	12.2717	9.27036	6.63534	7.09622	2.94619	3.24836	2.12007	1.08411	up
GO:0010745	negative regulation of macrophage derived foam cell differentiation	biological_process	8	0.0585751	ENSRNOG00000001821	Adipoq	adiponectin, C1Q and collagen domain containing [Source:RGD Symbol;Acc:628748]	0.269142	0.528074	0.422021	2.31808	1.93395	13.321	0.0693811	-3.84931	down
GO:0050913	sensory perception of bitter taste	biological_process	9	0.0585751	ENSRNOG00000005268	Gnat3	G protein subunit alpha transducin 3 [Source:RGD Symbol;Acc:727817]	1.06101	0.850564	1.51812	3.70113	2.49755	4.15072	0.331391	-1.5934	down
GO:0038170	somatostatin signaling pathway	biological_process	6	0.0585751	ENSRNOG00000048145	Sstr1	somatostatin receptor 1 [Source:RGD Symbol;Acc:3762]	1.29021	1.61171	1.86831	0.504885	0.640927	0.601976	2.72929	1.44853	up
GO:0072284	metanephric S-shaped body morphogenesis	biological_process	6	0.0585751	ENSRNOG00000026203	Pax8	paired box 8 [Source:RGD Symbol;Acc:620434]	0.878829	0.821269	0.820972	0.21796	0.383172	0.130189	3.44728	1.78546	up
GO:0061000	negative regulation of dendritic spine development	biological_process	13	0.0585751	ENSRNOG00000006565	Fstl4	follistatin-like 4 [Source:RGD Symbol;Acc:1307227]	1.13651	0.735415	0.132085	0.200113	0.165783	0.097167	4.32773	2.11361	up
GO:0015181	arginine transmembrane transporter activity	molecular_function	7	0.0585751	ENSRNOG00000054438	LOC292543	similar to solute carrier family 7 (cationic amino acid transporter, y+ system), member 3 [Source:RGD Symbol;Acc:1565097]	0.528722	0.612372	0.29992	0.047019	0.128095	0.082842	5.58628	2.48189	up
GO:0098703	calcium ion import across plasma membrane	biological_process	16	0.0585751	ENSRNOG00000038066	Fam155b	family with sequence similarity 155, member B [Source:RGD Symbol;Acc:1584125]	1.24283	1.12356	1.14399	0.650261	0.318461	0.399032	2.56653	1.35982	up
GO:0032224	positive regulation of synaptic transmission, cholinergic	biological_process	10	0.0585751	ENSRNOG00000011134	Lama2	laminin subunit alpha 2 [Source:RGD Symbol;Acc:1308889]	2.28319	2.43893	3.8991	6.65355	4.97214	6.4225	0.477678	-1.06589	down
GO:0042438	melanin biosynthetic process	biological_process	8	0.0585751	ENSRNOG00000014465	Oca2	OCA2 melanosomal transmembrane protein [Source:RGD Symbol;Acc:2318412]	0	0	0	0.101048	0.120925	0.079096	0.000996449	-9.97092	down
GO:2001269	positive regulation of cysteine-type endopeptidase activity involved in apoptotic signaling pathway	biological_process	11	0.0585751	ENSRNOG00000006200	St18	ST18 C2H2C-type zinc finger transcription factor [Source:RGD Symbol;Acc:708566]	0.0769487	0.146815	0.116223	0.389868	0.323476	0.228701	0.360903	-1.47032	down
GO:0051918	negative regulation of fibrinolysis	biological_process	9	0.0585751	ENSRNOG00000010935	Cpb2	carboxypeptidase B2 [Source:RGD Symbol;Acc:71035]	0.244928	0.291876	0.095584	0	0	0	2107.96	11.0416	up
GO:0005172	vascular endothelial growth factor receptor binding	molecular_function	7	0.0585751	ENSRNOG00000005650	Pgf	placental growth factor [Source:RGD Symbol;Acc:619850]	1.81335	1.74628	1.74662	2.71735	7.21811	5.43133	0.345306	-1.53405	down
GO:0021631	optic nerve morphogenesis	biological_process	6	0.0585751	ENSRNOG00000007865	Ephb1	Eph receptor B1 [Source:RGD Symbol;Acc:2556]	0.836464	0.793073	1.14742	0.471882	0.398737	0.218471	2.5498	1.35038	up
GO:1904938	planar cell polarity pathway involved in axon guidance	biological_process	10	0.0585751	ENSRNOG00000015618	Wnt5a	Wnt family member 5A [Source:RGD Symbol;Acc:69250]	3.0348	2.5955	2.2052	6.68335	4.54321	6.14645	0.451016	-1.14875	down
GO:0015840	urea transport	biological_process	8	0.0585751	ENSRNOG00000009686	Aqp7	aquaporin 7 [Source:RGD Symbol;Acc:2145]	0.04156	0.071983	0.079689	0.169014	0.259968	3.27253	0.0522035	-4.25971	down
GO:0048565	digestive tract development	biological_process	6	0.0593368	ENSRNOG00000003357	Col3a1	collagen type III alpha 1 chain [Source:RGD Symbol;Acc:71029]	156.474	148.568	159.465	332.712	580.742	362.723	0.363983	-1.45806	down
GO:0048565	digestive tract development	biological_process	6	0.0593368	ENSRNOG00000019500	Cyp1a1	cytochrome P450, family 1, subfamily a, polypeptide 1 [Source:RGD Symbol;Acc:2458]	1.30617	2.01733	6.01601	22.1476	22.9681	33.3498	0.119027	-3.07064	down
GO:0046677	response to antibiotic	biological_process	5	0.0593368	ENSRNOG00000012674	Adrb3	adrenoceptor beta 3 [Source:RGD Symbol;Acc:2061]	0	0	0	0.089852	0.041841	1.01731	0.000261096	-11.9031	down
GO:0046677	response to antibiotic	biological_process	5	0.0593368	ENSRNOG00000019500	Cyp1a1	cytochrome P450, family 1, subfamily a, polypeptide 1 [Source:RGD Symbol;Acc:2458]	1.30617	2.01733	6.01601	22.1476	22.9681	33.3498	0.119027	-3.07064	down
GO:0046326	positive regulation of glucose import	biological_process	10	0.0593368	ENSRNOG00000001821	Adipoq	adiponectin, C1Q and collagen domain containing [Source:RGD Symbol;Acc:628748]	0.269142	0.528074	0.422021	2.31808	1.93395	13.321	0.0693811	-3.84931	down
GO:0046326	positive regulation of glucose import	biological_process	10	0.0593368	ENSRNOG00000017808	Klf15	Kruppel-like factor 15 [Source:RGD Symbol;Acc:70918]	12.6054	16.1892	16.6218	32.3243	28.6913	33.7467	0.479266	-1.0611	down
GO:0071805	potassium ion transmembrane transport	biological_process	10	0.0594284	ENSRNOG00000002303	Kcnj12	potassium voltage-gated channel subfamily J member 12 [Source:RGD Symbol;Acc:621660]	1.13507	0.91256	0.709237	2.64599	1.68286	2.79866	0.386793	-1.37037	down
GO:0071805	potassium ion transmembrane transport	biological_process	10	0.0594284	ENSRNOG00000020484	Trpm5	transient receptor potential cation channel, subfamily M, member 5 [Source:RGD Symbol;Acc:1310620]	5.99927	5.86911	10.0597	17.4263	11.9153	18.1559	0.461669	-1.11507	down
GO:0071805	potassium ion transmembrane transport	biological_process	10	0.0594284	ENSRNOG00000052486	Kcna6	potassium voltage-gated channel subfamily A member 6 [Source:RGD Symbol;Acc:62083]	0.206521	0.495587	0.476457	0.150545	0.128976	0.104822	3.06644	1.61657	up
GO:0071805	potassium ion transmembrane transport	biological_process	10	0.0594284	ENSRNOG00000056697	Kcnab1	potassium voltage-gated channel subfamily A member regulatory beta subunit 1 [Source:RGD Symbol;Acc:61827]	3.31095	2.45264	1.755	1.07741	1.03743	1.28351	2.21242	1.14563	up
GO:0032355	response to estradiol	biological_process	6	0.0594284	ENSRNOG00000002792	Cxcl2	C-X-C motif chemokine ligand 2 [Source:RGD Symbol;Acc:70069]	2.49155	1.56141	2.22508	0.21844	0.639161	0.597588	4.31425	2.10911	up
GO:0032355	response to estradiol	biological_process	6	0.0594284	ENSRNOG00000003897	Col1a1	collagen type I alpha 1 chain [Source:RGD Symbol;Acc:61817]	21.9343	20.0594	21.0288	58.1167	63.4283	51.677	0.363825	-1.45869	down
GO:0032355	response to estradiol	biological_process	6	0.0594284	ENSRNOG00000008943	Penk	proenkephalin [Source:RGD Symbol;Acc:68946]	1.132	1.55783	3.43566	0.621514	0.959967	0.863637	2.50519	1.32492	up
GO:0032355	response to estradiol	biological_process	6	0.0594284	ENSRNOG00000045797	Lep	leptin [Source:RGD Symbol;Acc:3000]	0.038354	0.031345	0.037116	0.113483	0.270256	1.22499	0.0663972	-3.91273	down
GO:0009612	response to mechanical stimulus	biological_process	5	0.0613601	ENSRNOG00000003357	Col3a1	collagen type III alpha 1 chain [Source:RGD Symbol;Acc:71029]	156.474	148.568	159.465	332.712	580.742	362.723	0.363983	-1.45806	down
GO:0009612	response to mechanical stimulus	biological_process	5	0.0613601	ENSRNOG00000003897	Col1a1	collagen type I alpha 1 chain [Source:RGD Symbol;Acc:61817]	21.9343	20.0594	21.0288	58.1167	63.4283	51.677	0.363825	-1.45869	down
GO:0009612	response to mechanical stimulus	biological_process	5	0.0613601	ENSRNOG00000016696	Angpt2	angiopoietin 2 [Source:RGD Symbol;Acc:621861]	3.01199	2.77709	3.05503	7.45684	6.76239	7.96137	0.398732	-1.32651	down
GO:0000187	activation of MAPK activity	biological_process	13	0.0613601	ENSRNOG00000004649	Il1b	interleukin 1 beta [Source:RGD Symbol;Acc:2891]	20.4545	17.8629	26.638	9.01274	9.02768	13.4852	2.0604	1.04293	up
GO:0000187	activation of MAPK activity	biological_process	13	0.0613601	ENSRNOG00000013887	Adra2b	adrenoceptor alpha 2B [Source:RGD Symbol;Acc:2057]	0.311704	0.246273	0.182689	0.886988	0.676955	1.17461	0.270458	-1.88652	down
GO:0000187	activation of MAPK activity	biological_process	13	0.0613601	ENSRNOG00000015618	Wnt5a	Wnt family member 5A [Source:RGD Symbol;Acc:69250]	3.0348	2.5955	2.2052	6.68335	4.54321	6.14645	0.451016	-1.14875	down
GO:0001501	skeletal system development	biological_process	6	0.0613601	ENSRNOG00000003357	Col3a1	collagen type III alpha 1 chain [Source:RGD Symbol;Acc:71029]	156.474	148.568	159.465	332.712	580.742	362.723	0.363983	-1.45806	down
GO:0001501	skeletal system development	biological_process	6	0.0613601	ENSRNOG00000003897	Col1a1	collagen type I alpha 1 chain [Source:RGD Symbol;Acc:61817]	21.9343	20.0594	21.0288	58.1167	63.4283	51.677	0.363825	-1.45869	down
GO:0001501	skeletal system development	biological_process	6	0.0613601	ENSRNOG00000053232	Ror2	receptor tyrosine kinase-like orphan receptor 2 [Source:RGD Symbol;Acc:1305275]	0.93753	0.843785	1.20048	2.20838	2.23265	2.21271	0.448138	-1.15799	down
GO:0071773	cellular response to BMP stimulus	biological_process	8	0.0625609	ENSRNOG00000015318	Heyl	hes-related family bHLH transcription factor with YRPW motif-like [Source:RGD Symbol;Acc:1305022]	2.94339	2.74707	3.0413	7.51638	10.985	9.78336	0.308709	-1.69568	down
GO:0071773	cellular response to BMP stimulus	biological_process	8	0.0625609	ENSRNOG00000018865	Adamts12	ADAM metallopeptidase with thrombospondin type 1 motif, 12 [Source:RGD Symbol;Acc:1307323]	1.22778	1.39158	1.85944	4.25796	2.71078	3.8658	0.413382	-1.27445	down
GO:0005109	frizzled binding	molecular_function	7	0.0625609	ENSRNOG00000015618	Wnt5a	Wnt family member 5A [Source:RGD Symbol;Acc:69250]	3.0348	2.5955	2.2052	6.68335	4.54321	6.14645	0.451016	-1.14875	down
GO:0005109	frizzled binding	molecular_function	7	0.0625609	ENSRNOG00000053232	Ror2	receptor tyrosine kinase-like orphan receptor 2 [Source:RGD Symbol;Acc:1305275]	0.93753	0.843785	1.20048	2.20838	2.23265	2.21271	0.448138	-1.15799	down
GO:0042130	negative regulation of T cell proliferation	biological_process	11	0.0625609	ENSRNOG00000008816	Gpnmb	glycoprotein nmb [Source:RGD Symbol;Acc:71008]	194.008	146.217	143.748	84.0387	88.9556	65.1415	2.03234	1.02314	up
GO:0042130	negative regulation of T cell proliferation	biological_process	11	0.0625609	ENSRNOG00000013304	Arg1	arginase 1 [Source:RGD Symbol;Acc:2150]	14.1945	11.7175	9.74681	5.09255	6.15658	5.0671	2.18549	1.12795	up
GO:0008080	N-acetyltransferase activity	molecular_function	8	0.0625609	ENSRNOG00000015763	Nat8f3	N-acetyltransferase 8 (GCN5-related) family member 3 [Source:RGD Symbol;Acc:621607]	1.70631	2.86391	2.56139	5.62887	3.47124	6.73715	0.450306	-1.15102	down
GO:0008080	N-acetyltransferase activity	molecular_function	8	0.0625609	ENSRNOG00000049351	Nat8l	N-acetyltransferase 8-like [Source:RGD Symbol;Acc:1305719]	0.414609	0.359825	0.569127	1.06015	0.774246	1.71601	0.378425	-1.40192	down
GO:0006952	defense response	biological_process	5	0.0633392	ENSRNOG00000002792	Cxcl2	C-X-C motif chemokine ligand 2 [Source:RGD Symbol;Acc:70069]	2.49155	1.56141	2.22508	0.21844	0.639161	0.597588	4.31425	2.10911	up
GO:0006952	defense response	biological_process	5	0.0633392	ENSRNOG00000022242	Cxcl9	C-X-C motif chemokine ligand 9 [Source:RGD Symbol;Acc:628798]	6.90616	5.99513	4.70513	2.639	3.00671	2.71353	2.10622	1.07466	up
GO:0006952	defense response	biological_process	5	0.0633392	ENSRNOG00000024899	Cxcl13	C-X-C motif chemokine ligand 13 [Source:RGD Symbol;Acc:1564256]	0.505115	0.912997	2.0192	4.23093	3.68046	3.58254	0.299054	-1.74152	down
GO:0032868	response to insulin	biological_process	7	0.0633392	ENSRNOG00000017808	Klf15	Kruppel-like factor 15 [Source:RGD Symbol;Acc:70918]	12.6054	16.1892	16.6218	32.3243	28.6913	33.7467	0.479266	-1.0611	down
GO:0032868	response to insulin	biological_process	7	0.0633392	ENSRNOG00000028616	Pck1	phosphoenolpyruvate carboxykinase 1 [Source:RGD Symbol;Acc:3267]	0.294123	0.258891	0.731558	1.09133	1.59168	18.8392	0.0596858	-4.06647	down
GO:0032868	response to insulin	biological_process	7	0.0633392	ENSRNOG00000045797	Lep	leptin [Source:RGD Symbol;Acc:3000]	0.038354	0.031345	0.037116	0.113483	0.270256	1.22499	0.0663972	-3.91273	down
GO:0030246	carbohydrate binding	molecular_function	4	0.0648496	ENSRNOG00000007951	Galnt14	polypeptide N-acetylgalactosaminyltransferase 14 [Source:RGD Symbol;Acc:1310068]	1.22288	1.53036	1.57812	0.196292	0.565801	0.096151	5.04677	2.33536	up
GO:0030246	carbohydrate binding	molecular_function	4	0.0648496	ENSRNOG00000014918	Klrg1	killer cell lectin like receptor G1 [Source:RGD Symbol;Acc:61978]	4.26076	7.30657	3.73	2.21767	1.5166	3.17449	2.21419	1.14678	up
GO:0030246	carbohydrate binding	molecular_function	4	0.0648496	ENSRNOG00000029644	Clec2l	C-type lectin domain family 2, member L [Source:RGD Symbol;Acc:1565373]	1.20902	0.984596	0.764145	6.04306	6.28006	5.00909	0.170651	-2.55088	down
GO:0030246	carbohydrate binding	molecular_function	4	0.0648496	ENSRNOG00000057643	Klri2	killer cell lectin-like receptor family I member 2 [Source:RGD Symbol;Acc:1359205]	4.15407	4.85632	2.9182	1.3324	0.727116	2.385	2.68389	1.42433	up
GO:0030246	carbohydrate binding	molecular_function	4	0.0648496	ENSRNOG00000060246	Klrd1	killer cell lectin like receptor D1 [Source:RGD Symbol;Acc:2978]	13.655	21.5233	11.2525	7.56228	4.74204	9.73844	2.1064	1.07478	up
GO:0072659	protein localization to plasma membrane	biological_process	8	0.0653254	ENSRNOG00000001821	Adipoq	adiponectin, C1Q and collagen domain containing [Source:RGD Symbol;Acc:628748]	0.269142	0.528074	0.422021	2.31808	1.93395	13.321	0.0693811	-3.84931	down
GO:0072659	protein localization to plasma membrane	biological_process	8	0.0653254	ENSRNOG00000008001	Rab3b	RAB3B, member RAS oncogene family [Source:RGD Symbol;Acc:620922]	2.76153	1.88236	3.18417	4.52952	5.74434	6.11997	0.4775	-1.06643	down
GO:0072659	protein localization to plasma membrane	biological_process	8	0.0653254	ENSRNOG00000022239	Trarg1	trafficking regulator of GLUT4 (SLC2A4) 1 [Source:RGD Symbol;Acc:1307639]	2.12065	2.24179	2.81453	5.40766	4.54121	9.15362	0.375708	-1.41232	down
GO:0072659	protein localization to plasma membrane	biological_process	8	0.0653254	ENSRNOG00000057221	Scn3b	sodium voltage-gated channel beta subunit 3 [Source:RGD Symbol;Acc:621657]	21.0976	17.1091	25.2416	51.1686	32.1861	48.604	0.480819	-1.05643	down
GO:0051879	Hsp90 protein binding	molecular_function	6	0.0658432	ENSRNOG00000014448	Arntl	aryl hydrocarbon receptor nuclear translocator-like [Source:RGD Symbol;Acc:62003]	12.2717	9.27036	6.63534	7.09622	2.94619	3.24836	2.12007	1.08411	up
GO:0051879	Hsp90 protein binding	molecular_function	6	0.0658432	ENSRNOG00000019500	Cyp1a1	cytochrome P450, family 1, subfamily a, polypeptide 1 [Source:RGD Symbol;Acc:2458]	1.30617	2.01733	6.01601	22.1476	22.9681	33.3498	0.119027	-3.07064	down
GO:0048545	response to steroid hormone	biological_process	6	0.0658432	ENSRNOG00000003897	Col1a1	collagen type I alpha 1 chain [Source:RGD Symbol;Acc:61817]	21.9343	20.0594	21.0288	58.1167	63.4283	51.677	0.363825	-1.45869	down
GO:0048545	response to steroid hormone	biological_process	6	0.0658432	ENSRNOG00000013304	Arg1	arginase 1 [Source:RGD Symbol;Acc:2150]	14.1945	11.7175	9.74681	5.09255	6.15658	5.0671	2.18549	1.12795	up
GO:0050767	regulation of neurogenesis	biological_process	8	0.0658432	ENSRNOG00000014448	Arntl	aryl hydrocarbon receptor nuclear translocator-like [Source:RGD Symbol;Acc:62003]	12.2717	9.27036	6.63534	7.09622	2.94619	3.24836	2.12007	1.08411	up
GO:0050767	regulation of neurogenesis	biological_process	8	0.0658432	ENSRNOG00000015318	Heyl	hes-related family bHLH transcription factor with YRPW motif-like [Source:RGD Symbol;Acc:1305022]	2.94339	2.74707	3.0413	7.51638	10.985	9.78336	0.308709	-1.69568	down
GO:0071346	cellular response to interferon-gamma	biological_process	8	0.0673852	ENSRNOG00000015618	Wnt5a	Wnt family member 5A [Source:RGD Symbol;Acc:69250]	3.0348	2.5955	2.2052	6.68335	4.54321	6.14645	0.451016	-1.14875	down
GO:0071346	cellular response to interferon-gamma	biological_process	8	0.0673852	ENSRNOG00000020904	Cdc42ep2	CDC42 effector protein 2 [Source:RGD Symbol;Acc:1310253]	16.1048	13.5876	19.8116	27.6602	36.9112	34.8229	0.498057	-1.00562	down
GO:0071346	cellular response to interferon-gamma	biological_process	8	0.0673852	ENSRNOG00000028548	Ccl9	chemokine (C-C motif) ligand 9 [Source:RGD Symbol;Acc:1310563]	37.5481	17.7937	27.4866	12.7972	13.0843	8.17364	2.43218	1.28225	up
GO:0008237	metallopeptidase activity	molecular_function	7	0.0683844	ENSRNOG00000010935	Cpb2	carboxypeptidase B2 [Source:RGD Symbol;Acc:71035]	0.244928	0.291876	0.095584	0	0	0	2107.96	11.0416	up
GO:0008237	metallopeptidase activity	molecular_function	7	0.0683844	ENSRNOG00000016695	Mmp2	matrix metallopeptidase 2 [Source:RGD Symbol;Acc:621316]	30.7938	26.2646	32.2348	67.5082	55.093	74.8328	0.452269	-1.14475	down
GO:0008237	metallopeptidase activity	molecular_function	7	0.0683844	ENSRNOG00000018865	Adamts12	ADAM metallopeptidase with thrombospondin type 1 motif, 12 [Source:RGD Symbol;Acc:1307323]	1.22778	1.39158	1.85944	4.25796	2.71078	3.8658	0.413382	-1.27445	down
GO:0008237	metallopeptidase activity	molecular_function	7	0.0683844	ENSRNOG00000037080	Adamts17	ADAM metallopeptidase with thrombospondin type 1 motif, 17 [Source:RGD Symbol;Acc:1308783]	0.97741	1.04513	1.43016	3.83248	2.55941	2.78039	0.376428	-1.40956	down
GO:0010811	positive regulation of cell-substrate adhesion	biological_process	7	0.0691817	ENSRNOG00000002461	Nid1	nidogen 1 [Source:RGD Symbol;Acc:3178]	7.0868	7.3753	8.23495	25.6053	16.1071	15.6315	0.395806	-1.33713	down
GO:0010811	positive regulation of cell-substrate adhesion	biological_process	7	0.0691817	ENSRNOG00000012058	Egflam	EGF-like, fibronectin type III and laminin G domains [Source:RGD Symbol;Acc:1306592]	2.05351	2.02171	3.25163	5.82235	4.33722	6.77696	0.432607	-1.20887	down
GO:0030199	collagen fibril organization	biological_process	7	0.0691817	ENSRNOG00000003357	Col3a1	collagen type III alpha 1 chain [Source:RGD Symbol;Acc:71029]	156.474	148.568	159.465	332.712	580.742	362.723	0.363983	-1.45806	down
GO:0030199	collagen fibril organization	biological_process	7	0.0691817	ENSRNOG00000003897	Col1a1	collagen type I alpha 1 chain [Source:RGD Symbol;Acc:61817]	21.9343	20.0594	21.0288	58.1167	63.4283	51.677	0.363825	-1.45869	down
GO:0048705	skeletal system morphogenesis	biological_process	6	0.0691817	ENSRNOG00000003897	Col1a1	collagen type I alpha 1 chain [Source:RGD Symbol;Acc:61817]	21.9343	20.0594	21.0288	58.1167	63.4283	51.677	0.363825	-1.45869	down
GO:0048705	skeletal system morphogenesis	biological_process	6	0.0691817	ENSRNOG00000016695	Mmp2	matrix metallopeptidase 2 [Source:RGD Symbol;Acc:621316]	30.7938	26.2646	32.2348	67.5082	55.093	74.8328	0.452269	-1.14475	down
GO:0043407	negative regulation of MAP kinase activity	biological_process	12	0.0691817	ENSRNOG00000001821	Adipoq	adiponectin, C1Q and collagen domain containing [Source:RGD Symbol;Acc:628748]	0.269142	0.528074	0.422021	2.31808	1.93395	13.321	0.0693811	-3.84931	down
GO:0043407	negative regulation of MAP kinase activity	biological_process	12	0.0691817	ENSRNOG00000004649	Il1b	interleukin 1 beta [Source:RGD Symbol;Acc:2891]	20.4545	17.8629	26.638	9.01274	9.02768	13.4852	2.0604	1.04293	up
GO:0035630	bone mineralization involved in bone maturation	biological_process	8	0.0698736	ENSRNOG00000045797	Lep	leptin [Source:RGD Symbol;Acc:3000]	0.038354	0.031345	0.037116	0.113483	0.270256	1.22499	0.0663972	-3.91273	down
GO:0046033	AMP metabolic process	biological_process	11	0.0698736	ENSRNOG00000018656	Ampd1	adenosine monophosphate deaminase 1 [Source:RGD Symbol;Acc:2109]	0.090801	0.074378	0.16613	0.011129	0	0	29.7699	4.89578	up
GO:0032264	IMP salvage	biological_process	13	0.0698736	ENSRNOG00000018656	Ampd1	adenosine monophosphate deaminase 1 [Source:RGD Symbol;Acc:2109]	0.090801	0.074378	0.16613	0.011129	0	0	29.7699	4.89578	up
GO:0019239	deaminase activity	molecular_function	5	0.0698736	ENSRNOG00000018656	Ampd1	adenosine monophosphate deaminase 1 [Source:RGD Symbol;Acc:2109]	0.090801	0.074378	0.16613	0.011129	0	0	29.7699	4.89578	up
GO:0048806	genitalia development	biological_process	6	0.0698736	ENSRNOG00000015618	Wnt5a	Wnt family member 5A [Source:RGD Symbol;Acc:69250]	3.0348	2.5955	2.2052	6.68335	4.54321	6.14645	0.451016	-1.14875	down
GO:0007617	mating behavior	biological_process	5	0.0698736	ENSRNOG00000032828	Mapk8ip2	mitogen-activated protein kinase 8 interacting protein 2 [Source:RGD Symbol;Acc:1309727]	0	0.011052	0	0.164696	0.033483	0.104562	0.0365065	-4.7757	down
GO:0010757	negative regulation of plasminogen activation	biological_process	11	0.0698736	ENSRNOG00000010935	Cpb2	carboxypeptidase B2 [Source:RGD Symbol;Acc:71035]	0.244928	0.291876	0.095584	0	0	0	2107.96	11.0416	up
GO:0007260	tyrosine phosphorylation of STAT protein	biological_process	11	0.0698736	ENSRNOG00000045797	Lep	leptin [Source:RGD Symbol;Acc:3000]	0.038354	0.031345	0.037116	0.113483	0.270256	1.22499	0.0663972	-3.91273	down
GO:1902259	regulation of delayed rectifier potassium channel activity	biological_process	9	0.0698736	ENSRNOG00000056697	Kcnab1	potassium voltage-gated channel subfamily A member regulatory beta subunit 1 [Source:RGD Symbol;Acc:61827]	3.31095	2.45264	1.755	1.07741	1.03743	1.28351	2.21242	1.14563	up
GO:2000651	positive regulation of sodium ion transmembrane transporter activity	biological_process	8	0.0698736	ENSRNOG00000016684	Wnk2	WNK lysine deficient protein kinase 2 [Source:RGD Symbol;Acc:1307284]	2.24948	2.78267	2.93501	1.49678	1.02756	1.17308	2.15479	1.10755	up
GO:0042753	positive regulation of circadian rhythm	biological_process	6	0.0698736	ENSRNOG00000014448	Arntl	aryl hydrocarbon receptor nuclear translocator-like [Source:RGD Symbol;Acc:62003]	12.2717	9.27036	6.63534	7.09622	2.94619	3.24836	2.12007	1.08411	up
GO:0007215	glutamate receptor signaling pathway	biological_process	6	0.0698736	ENSRNOG00000048145	Sstr1	somatostatin receptor 1 [Source:RGD Symbol;Acc:3762]	1.29021	1.61171	1.86831	0.504885	0.640927	0.601976	2.72929	1.44853	up
GO:0000050	urea cycle	biological_process	8	0.0698736	ENSRNOG00000013304	Arg1	arginase 1 [Source:RGD Symbol;Acc:2150]	14.1945	11.7175	9.74681	5.09255	6.15658	5.0671	2.18549	1.12795	up
GO:0046850	regulation of bone remodeling	biological_process	7	0.0698736	ENSRNOG00000045797	Lep	leptin [Source:RGD Symbol;Acc:3000]	0.038354	0.031345	0.037116	0.113483	0.270256	1.22499	0.0663972	-3.91273	down
GO:0050917	sensory perception of umami taste	biological_process	9	0.0698736	ENSRNOG00000005268	Gnat3	G protein subunit alpha transducin 3 [Source:RGD Symbol;Acc:727817]	1.06101	0.850564	1.51812	3.70113	2.49755	4.15072	0.331391	-1.5934	down
GO:0015193	L-proline transmembrane transporter activity	molecular_function	7	0.0698736	ENSRNOG00000018644	Slc6a7	solute carrier family 6 member 7 [Source:RGD Symbol;Acc:620928]	1.38866	1.04448	0.392996	0.497343	0.247701	0.272771	2.77667	1.47335	up
GO:0072201	negative regulation of mesenchymal cell proliferation	biological_process	8	0.0698736	ENSRNOG00000015618	Wnt5a	Wnt family member 5A [Source:RGD Symbol;Acc:69250]	3.0348	2.5955	2.2052	6.68335	4.54321	6.14645	0.451016	-1.14875	down
GO:0050691	regulation of defense response to virus by host	biological_process	8	0.0698736	ENSRNOG00000004649	Il1b	interleukin 1 beta [Source:RGD Symbol;Acc:2891]	20.4545	17.8629	26.638	9.01274	9.02768	13.4852	2.0604	1.04293	up
GO:0035252	UDP-xylosyltransferase activity	molecular_function	7	0.0698736	ENSRNOG00000005621	Gxylt2	glucoside xylosyltransferase 2 [Source:RGD Symbol;Acc:1586482]	0.546039	0.97027	0.96179	2.15225	1.64357	2.30024	0.406508	-1.29864	down
GO:0060056	mammary gland involution	biological_process	5	0.0698736	ENSRNOG00000013304	Arg1	arginase 1 [Source:RGD Symbol;Acc:2150]	14.1945	11.7175	9.74681	5.09255	6.15658	5.0671	2.18549	1.12795	up
GO:0006003	fructose 2,6-bisphosphate metabolic process	biological_process	7	0.0698736	ENSRNOG00000018911	Pfkfb3	6-phosphofructo-2-kinase/fructose-2,6-biphosphatase 3 [Source:RGD Symbol;Acc:619776]	19.8305	24.4373	25.5297	38.5041	62.3266	54.9695	0.447993	-1.15845	down
GO:0072307	regulation of metanephric nephron tubule epithelial cell differentiation	biological_process	10	0.0698736	ENSRNOG00000026203	Pax8	paired box 8 [Source:RGD Symbol;Acc:620434]	0.878829	0.821269	0.820972	0.21796	0.383172	0.130189	3.44728	1.78546	up
GO:0009308	amine metabolic process	biological_process	6	0.0698736	ENSRNOG00000019500	Cyp1a1	cytochrome P450, family 1, subfamily a, polypeptide 1 [Source:RGD Symbol;Acc:2458]	1.30617	2.01733	6.01601	22.1476	22.9681	33.3498	0.119027	-3.07064	down
GO:0035524	proline transmembrane transport	biological_process	12	0.0698736	ENSRNOG00000018644	Slc6a7	solute carrier family 6 member 7 [Source:RGD Symbol;Acc:620928]	1.38866	1.04448	0.392996	0.497343	0.247701	0.272771	2.77667	1.47335	up
GO:1900180	regulation of protein localization to nucleus	biological_process	8	0.0698736	ENSRNOG00000045797	Lep	leptin [Source:RGD Symbol;Acc:3000]	0.038354	0.031345	0.037116	0.113483	0.270256	1.22499	0.0663972	-3.91273	down
GO:2000049	positive regulation of cell-cell adhesion mediated by cadherin	biological_process	8	0.0698736	ENSRNOG00000015618	Wnt5a	Wnt family member 5A [Source:RGD Symbol;Acc:69250]	3.0348	2.5955	2.2052	6.68335	4.54321	6.14645	0.451016	-1.14875	down
GO:0032611	interleukin-1 beta production	biological_process	6	0.0698736	ENSRNOG00000004649	Il1b	interleukin 1 beta [Source:RGD Symbol;Acc:2891]	20.4545	17.8629	26.638	9.01274	9.02768	13.4852	2.0604	1.04293	up
GO:0046323	glucose import	biological_process	12	0.0698736	ENSRNOG00000017226	Slc2a4	solute carrier family 2 member 4 [Source:RGD Symbol;Acc:2711]	0.725115	0.747971	0.866538	1.38289	1.35574	3.8632	0.35439	-1.49659	down
GO:0036041	long-chain fatty acid binding	molecular_function	6	0.0698736	ENSRNOG00000003580	Ucp1	uncoupling protein 1 [Source:RGD Symbol;Acc:3931]	0	0	0	0	0	12.6582	2.37001e-05	-15.3647	down
GO:0010944	negative regulation of transcription by competitive promoter binding	biological_process	10	0.0698736	ENSRNOG00000008834	Dach1	dachshund family transcription factor 1 [Source:RGD Symbol;Acc:1592073]	2.70691	2.93544	4.62768	7.82299	6.27939	6.83599	0.490489	-1.02771	down
GO:1990405	protein antigen binding	molecular_function	5	0.0698736	ENSRNOG00000060246	Klrd1	killer cell lectin like receptor D1 [Source:RGD Symbol;Acc:2978]	13.655	21.5233	11.2525	7.56228	4.74204	9.73844	2.1064	1.07478	up
GO:1901016	regulation of potassium ion transmembrane transporter activity	biological_process	8	0.0698736	ENSRNOG00000056697	Kcnab1	potassium voltage-gated channel subfamily A member regulatory beta subunit 1 [Source:RGD Symbol;Acc:61827]	3.31095	2.45264	1.755	1.07741	1.03743	1.28351	2.21242	1.14563	up
GO:0031394	positive regulation of prostaglandin biosynthetic process	biological_process	12	0.0698736	ENSRNOG00000004649	Il1b	interleukin 1 beta [Source:RGD Symbol;Acc:2891]	20.4545	17.8629	26.638	9.01274	9.02768	13.4852	2.0604	1.04293	up
GO:0009168	purine ribonucleoside monophosphate biosynthetic process	biological_process	11	0.0698736	ENSRNOG00000018656	Ampd1	adenosine monophosphate deaminase 1 [Source:RGD Symbol;Acc:2109]	0.090801	0.074378	0.16613	0.011129	0	0	29.7699	4.89578	up
GO:0086014	atrial cardiac muscle cell action potential	biological_process	9	0.0698736	ENSRNOG00000057221	Scn3b	sodium voltage-gated channel beta subunit 3 [Source:RGD Symbol;Acc:621657]	21.0976	17.1091	25.2416	51.1686	32.1861	48.604	0.480819	-1.05643	down
GO:0014033	neural crest cell differentiation	biological_process	7	0.0698736	ENSRNOG00000007765	Frzb	frizzled-related protein [Source:RGD Symbol;Acc:1311315]	0.835247	1.32762	1.13202	2.30154	1.72858	2.68979	0.490317	-1.02821	down
GO:0072112	glomerular visceral epithelial cell differentiation	biological_process	7	0.0698736	ENSRNOG00000017808	Klf15	Kruppel-like factor 15 [Source:RGD Symbol;Acc:70918]	12.6054	16.1892	16.6218	32.3243	28.6913	33.7467	0.479266	-1.0611	down
GO:0019800	peptide cross-linking via chondroitin 4-sulfate glycosaminoglycan	biological_process	10	0.0698736	ENSRNOG00000012058	Egflam	EGF-like, fibronectin type III and laminin G domains [Source:RGD Symbol;Acc:1306592]	2.05351	2.02171	3.25163	5.82235	4.33722	6.77696	0.432607	-1.20887	down
GO:0032451	demethylase activity	molecular_function	4	0.0698736	ENSRNOG00000019500	Cyp1a1	cytochrome P450, family 1, subfamily a, polypeptide 1 [Source:RGD Symbol;Acc:2458]	1.30617	2.01733	6.01601	22.1476	22.9681	33.3498	0.119027	-3.07064	down
GO:0060478	acrosomal vesicle exocytosis	biological_process	10	0.0698736	ENSRNOG00000019163	Syt6	synaptotagmin 6 [Source:RGD Symbol;Acc:62012]	0.1703	0.178842	0.252158	0.527108	0.644704	0.817466	0.30227	-1.72609	down
GO:0045906	negative regulation of vasoconstriction	biological_process	10	0.0698736	ENSRNOG00000045797	Lep	leptin [Source:RGD Symbol;Acc:3000]	0.038354	0.031345	0.037116	0.113483	0.270256	1.22499	0.0663972	-3.91273	down
GO:2000404	regulation of T cell migration	biological_process	8	0.0698736	ENSRNOG00000043342	LOC290595	hypothetical gene supported by AF152002 [Source:RGD Symbol;Acc:1566160]	0.873931	12.6402	1.47192	0	0.505809	0.50069	14.8893	3.89621	up
GO:0050916	sensory perception of sweet taste	biological_process	9	0.0698736	ENSRNOG00000005268	Gnat3	G protein subunit alpha transducin 3 [Source:RGD Symbol;Acc:727817]	1.06101	0.850564	1.51812	3.70113	2.49755	4.15072	0.331391	-1.5934	down
GO:0008035	high-density lipoprotein particle binding	molecular_function	7	0.0698736	ENSRNOG00000013578	Trem2	triggering receptor expressed on myeloid cells 2 [Source:RGD Symbol;Acc:1309841]	10.8948	5.01708	5.6079	3.19457	3.44342	4.12088	2.00019	1.00014	up
GO:0004439	phosphatidylinositol-4,5-bisphosphate 5-phosphatase activity	molecular_function	10	0.0698736	ENSRNOG00000019361	Inpp5j	inositol polyphosphate-5-phosphatase J [Source:RGD Symbol;Acc:620541]	0.506732	0.656187	0.933052	1.64089	1.20865	1.66385	0.46439	-1.10659	down
GO:0071871	response to epinephrine	biological_process	8	0.0698736	ENSRNOG00000008943	Penk	proenkephalin [Source:RGD Symbol;Acc:68946]	1.132	1.55783	3.43566	0.621514	0.959967	0.863637	2.50519	1.32492	up
GO:0014031	mesenchymal cell development	biological_process	6	0.0698736	ENSRNOG00000015318	Heyl	hes-related family bHLH transcription factor with YRPW motif-like [Source:RGD Symbol;Acc:1305022]	2.94339	2.74707	3.0413	7.51638	10.985	9.78336	0.308709	-1.69568	down
GO:0005078	MAP-kinase scaffold activity	molecular_function	7	0.0698736	ENSRNOG00000032828	Mapk8ip2	mitogen-activated protein kinase 8 interacting protein 2 [Source:RGD Symbol;Acc:1309727]	0	0.011052	0	0.164696	0.033483	0.104562	0.0365065	-4.7757	down
GO:0090037	positive regulation of protein kinase C signaling	biological_process	10	0.0698736	ENSRNOG00000015618	Wnt5a	Wnt family member 5A [Source:RGD Symbol;Acc:69250]	3.0348	2.5955	2.2052	6.68335	4.54321	6.14645	0.451016	-1.14875	down
GO:0044691	tooth eruption	biological_process	5	0.0698736	ENSRNOG00000003897	Col1a1	collagen type I alpha 1 chain [Source:RGD Symbol;Acc:61817]	21.9343	20.0594	21.0288	58.1167	63.4283	51.677	0.363825	-1.45869	down
GO:0071599	otic vesicle development	biological_process	7	0.0698736	ENSRNOG00000026203	Pax8	paired box 8 [Source:RGD Symbol;Acc:620434]	0.878829	0.821269	0.820972	0.21796	0.383172	0.130189	3.44728	1.78546	up
GO:0007411	axon guidance	biological_process	6	0.0699413	ENSRNOG00000003732	Flrt2	fibronectin leucine rich transmembrane protein 2 [Source:RGD Symbol;Acc:1308574]	1.80281	2.04289	1.39731	3.1207	4.03324	3.75719	0.480519	-1.05733	down
GO:0007411	axon guidance	biological_process	6	0.0699413	ENSRNOG00000007865	Ephb1	Eph receptor B1 [Source:RGD Symbol;Acc:2556]	0.836464	0.793073	1.14742	0.471882	0.398737	0.218471	2.5498	1.35038	up
GO:0007411	axon guidance	biological_process	6	0.0699413	ENSRNOG00000011134	Lama2	laminin subunit alpha 2 [Source:RGD Symbol;Acc:1308889]	2.28319	2.43893	3.8991	6.65355	4.97214	6.4225	0.477678	-1.06589	down
GO:0007411	axon guidance	biological_process	6	0.0699413	ENSRNOG00000015618	Wnt5a	Wnt family member 5A [Source:RGD Symbol;Acc:69250]	3.0348	2.5955	2.2052	6.68335	4.54321	6.14645	0.451016	-1.14875	down
GO:0001658	branching involved in ureteric bud morphogenesis	biological_process	7	0.0725747	ENSRNOG00000005650	Pgf	placental growth factor [Source:RGD Symbol;Acc:619850]	1.81335	1.74628	1.74662	2.71735	7.21811	5.43133	0.345306	-1.53405	down
GO:0001658	branching involved in ureteric bud morphogenesis	biological_process	7	0.0725747	ENSRNOG00000026203	Pax8	paired box 8 [Source:RGD Symbol;Acc:620434]	0.878829	0.821269	0.820972	0.21796	0.383172	0.130189	3.44728	1.78546	up
GO:0030217	T cell differentiation	biological_process	8	0.0725747	ENSRNOG00000045797	Lep	leptin [Source:RGD Symbol;Acc:3000]	0.038354	0.031345	0.037116	0.113483	0.270256	1.22499	0.0663972	-3.91273	down
GO:0030217	T cell differentiation	biological_process	8	0.0725747	ENSRNOG00000048145	Sstr1	somatostatin receptor 1 [Source:RGD Symbol;Acc:3762]	1.29021	1.61171	1.86831	0.504885	0.640927	0.601976	2.72929	1.44853	up
GO:0002377	immunoglobulin production	biological_process	5	0.0747207	ENSRNOG00000046284	AABR07027451		26.299	19.8172	39.4233	14.0253	14.5267	12.5528	2.08101	1.05728	up
GO:0002377	immunoglobulin production	biological_process	5	0.0747207	ENSRNOG00000053527	AABR07034736		0.383625	8.49939	2.28705	0.376116	0.617458	0.239601	9.05798	3.17919	up
GO:0002377	immunoglobulin production	biological_process	5	0.0747207	ENSRNOG00000060654	AABR07061068		1.08529	0.377827	8.27935	0	0	0	32474.9	14.987	up
GO:0002377	immunoglobulin production	biological_process	5	0.0747207	ENSRNOG00000061169	AABR07060952		2.81259	7.86063	2.48243	0.555443	0.274862	1.28312	6.22479	2.63802	up
GO:0007584	response to nutrient	biological_process	7	0.07582	ENSRNOG00000001821	Adipoq	adiponectin, C1Q and collagen domain containing [Source:RGD Symbol;Acc:628748]	0.269142	0.528074	0.422021	2.31808	1.93395	13.321	0.0693811	-3.84931	down
GO:0007584	response to nutrient	biological_process	7	0.07582	ENSRNOG00000003897	Col1a1	collagen type I alpha 1 chain [Source:RGD Symbol;Acc:61817]	21.9343	20.0594	21.0288	58.1167	63.4283	51.677	0.363825	-1.45869	down
GO:0007584	response to nutrient	biological_process	7	0.07582	ENSRNOG00000045797	Lep	leptin [Source:RGD Symbol;Acc:3000]	0.038354	0.031345	0.037116	0.113483	0.270256	1.22499	0.0663972	-3.91273	down
GO:0042383	sarcolemma	cellular_component	5	0.07582	ENSRNOG00000001249	Col6a1	collagen type VI alpha 1 chain [Source:RGD Symbol;Acc:1565398]	46.125	44.8447	58.8249	100.324	89.8661	110.945	0.497433	-1.00743	down
GO:0042383	sarcolemma	cellular_component	5	0.07582	ENSRNOG00000011134	Lama2	laminin subunit alpha 2 [Source:RGD Symbol;Acc:1308889]	2.28319	2.43893	3.8991	6.65355	4.97214	6.4225	0.477678	-1.06589	down
GO:0042383	sarcolemma	cellular_component	5	0.07582	ENSRNOG00000017226	Slc2a4	solute carrier family 2 member 4 [Source:RGD Symbol;Acc:2711]	0.725115	0.747971	0.866538	1.38289	1.35574	3.8632	0.35439	-1.49659	down
GO:0006635	fatty acid beta-oxidation	biological_process	11	0.0760204	ENSRNOG00000001821	Adipoq	adiponectin, C1Q and collagen domain containing [Source:RGD Symbol;Acc:628748]	0.269142	0.528074	0.422021	2.31808	1.93395	13.321	0.0693811	-3.84931	down
GO:0006635	fatty acid beta-oxidation	biological_process	11	0.0760204	ENSRNOG00000045797	Lep	leptin [Source:RGD Symbol;Acc:3000]	0.038354	0.031345	0.037116	0.113483	0.270256	1.22499	0.0663972	-3.91273	down
GO:0007623	circadian rhythm	biological_process	4	0.0779984	ENSRNOG00000001821	Adipoq	adiponectin, C1Q and collagen domain containing [Source:RGD Symbol;Acc:628748]	0.269142	0.528074	0.422021	2.31808	1.93395	13.321	0.0693811	-3.84931	down
GO:0007623	circadian rhythm	biological_process	4	0.0779984	ENSRNOG00000014448	Arntl	aryl hydrocarbon receptor nuclear translocator-like [Source:RGD Symbol;Acc:62003]	12.2717	9.27036	6.63534	7.09622	2.94619	3.24836	2.12007	1.08411	up
GO:0007623	circadian rhythm	biological_process	4	0.0779984	ENSRNOG00000045797	Lep	leptin [Source:RGD Symbol;Acc:3000]	0.038354	0.031345	0.037116	0.113483	0.270256	1.22499	0.0663972	-3.91273	down
GO:0010718	positive regulation of epithelial to mesenchymal transition	biological_process	8	0.0795171	ENSRNOG00000003897	Col1a1	collagen type I alpha 1 chain [Source:RGD Symbol;Acc:61817]	21.9343	20.0594	21.0288	58.1167	63.4283	51.677	0.363825	-1.45869	down
GO:0010718	positive regulation of epithelial to mesenchymal transition	biological_process	8	0.0795171	ENSRNOG00000004649	Il1b	interleukin 1 beta [Source:RGD Symbol;Acc:2891]	20.4545	17.8629	26.638	9.01274	9.02768	13.4852	2.0604	1.04293	up
GO:0019882	antigen processing and presentation	biological_process	4	0.0795171	ENSRNOG00000008001	Rab3b	RAB3B, member RAS oncogene family [Source:RGD Symbol;Acc:620922]	2.76153	1.88236	3.18417	4.52952	5.74434	6.11997	0.4775	-1.06643	down
GO:0019882	antigen processing and presentation	biological_process	4	0.0795171	ENSRNOG00000030431	RT1-Db2	RT1 class II, locus Db2 [Source:RGD Symbol;Acc:1595922]	3.57562	1.76437	1.09238	0.503178	0.344361	1.19923	3.14269	1.652	up
GO:0043588	skin development	biological_process	6	0.0795171	ENSRNOG00000003357	Col3a1	collagen type III alpha 1 chain [Source:RGD Symbol;Acc:71029]	156.474	148.568	159.465	332.712	580.742	362.723	0.363983	-1.45806	down
GO:0043588	skin development	biological_process	6	0.0795171	ENSRNOG00000003897	Col1a1	collagen type I alpha 1 chain [Source:RGD Symbol;Acc:61817]	21.9343	20.0594	21.0288	58.1167	63.4283	51.677	0.363825	-1.45869	down
GO:0032720	negative regulation of tumor necrosis factor production	biological_process	9	0.0795171	ENSRNOG00000001821	Adipoq	adiponectin, C1Q and collagen domain containing [Source:RGD Symbol;Acc:628748]	0.269142	0.528074	0.422021	2.31808	1.93395	13.321	0.0693811	-3.84931	down
GO:0032720	negative regulation of tumor necrosis factor production	biological_process	9	0.0795171	ENSRNOG00000008816	Gpnmb	glycoprotein nmb [Source:RGD Symbol;Acc:71008]	194.008	146.217	143.748	84.0387	88.9556	65.1415	2.03234	1.02314	up
GO:0009913	epidermal cell differentiation	biological_process	7	0.0810372	ENSRNOG00000025120	Gli1	GLI family zinc finger 1 [Source:RGD Symbol;Acc:621673]	0.698325	0.477126	0.544131	1.56395	1.68971	1.52278	0.360013	-1.47388	down
GO:0005005	transmembrane-ephrin receptor activity	molecular_function	11	0.0810372	ENSRNOG00000007865	Ephb1	Eph receptor B1 [Source:RGD Symbol;Acc:2556]	0.836464	0.793073	1.14742	0.471882	0.398737	0.218471	2.5498	1.35038	up
GO:0150012	positive regulation of neuron projection arborization	biological_process	12	0.0810372	ENSRNOG00000015618	Wnt5a	Wnt family member 5A [Source:RGD Symbol;Acc:69250]	3.0348	2.5955	2.2052	6.68335	4.54321	6.14645	0.451016	-1.14875	down
GO:0030853	negative regulation of granulocyte differentiation	biological_process	10	0.0810372	ENSRNOG00000001821	Adipoq	adiponectin, C1Q and collagen domain containing [Source:RGD Symbol;Acc:628748]	0.269142	0.528074	0.422021	2.31808	1.93395	13.321	0.0693811	-3.84931	down
GO:0090009	primitive streak formation	biological_process	5	0.0810372	ENSRNOG00000015618	Wnt5a	Wnt family member 5A [Source:RGD Symbol;Acc:69250]	3.0348	2.5955	2.2052	6.68335	4.54321	6.14645	0.451016	-1.14875	down
GO:0001771	immunological synapse formation	biological_process	6	0.0810372	ENSRNOG00000007865	Ephb1	Eph receptor B1 [Source:RGD Symbol;Acc:2556]	0.836464	0.793073	1.14742	0.471882	0.398737	0.218471	2.5498	1.35038	up
GO:0045545	syndecan binding	molecular_function	6	0.0810372	ENSRNOG00000008816	Gpnmb	glycoprotein nmb [Source:RGD Symbol;Acc:71008]	194.008	146.217	143.748	84.0387	88.9556	65.1415	2.03234	1.02314	up
GO:0003344	pericardium morphogenesis	biological_process	8	0.0810372	ENSRNOG00000015618	Wnt5a	Wnt family member 5A [Source:RGD Symbol;Acc:69250]	3.0348	2.5955	2.2052	6.68335	4.54321	6.14645	0.451016	-1.14875	down
GO:0072164	mesonephric tubule development	biological_process	6	0.0810372	ENSRNOG00000026203	Pax8	paired box 8 [Source:RGD Symbol;Acc:620434]	0.878829	0.821269	0.820972	0.21796	0.383172	0.130189	3.44728	1.78546	up
GO:0009062	fatty acid catabolic process	biological_process	10	0.0810372	ENSRNOG00000045797	Lep	leptin [Source:RGD Symbol;Acc:3000]	0.038354	0.031345	0.037116	0.113483	0.270256	1.22499	0.0663972	-3.91273	down
GO:0003198	epithelial to mesenchymal transition involved in endocardial cushion formation	biological_process	9	0.0810372	ENSRNOG00000015318	Heyl	hes-related family bHLH transcription factor with YRPW motif-like [Source:RGD Symbol;Acc:1305022]	2.94339	2.74707	3.0413	7.51638	10.985	9.78336	0.308709	-1.69568	down
GO:0045687	positive regulation of glial cell differentiation	biological_process	11	0.0810372	ENSRNOG00000002364	Rnf112	ring finger protein 112 [Source:RGD Symbol;Acc:3986]	0.268859	0.283787	0.444264	0.501704	1.23498	0.948211	0.371303	-1.42933	down
GO:0003208	cardiac ventricle morphogenesis	biological_process	6	0.0810372	ENSRNOG00000015318	Heyl	hes-related family bHLH transcription factor with YRPW motif-like [Source:RGD Symbol;Acc:1305022]	2.94339	2.74707	3.0413	7.51638	10.985	9.78336	0.308709	-1.69568	down
GO:0043589	skin morphogenesis	biological_process	6	0.0810372	ENSRNOG00000003897	Col1a1	collagen type I alpha 1 chain [Source:RGD Symbol;Acc:61817]	21.9343	20.0594	21.0288	58.1167	63.4283	51.677	0.363825	-1.45869	down
GO:0042743	hydrogen peroxide metabolic process	biological_process	7	0.0810372	ENSRNOG00000018005	Duoxa1	dual oxidase maturation factor 1 [Source:RGD Symbol;Acc:1306601]	5.56049	2.15936	4.37417	1.58063	1.28771	1.77397	2.60517	1.38138	up
GO:0032036	myosin heavy chain binding	molecular_function	7	0.0810372	ENSRNOG00000018656	Ampd1	adenosine monophosphate deaminase 1 [Source:RGD Symbol;Acc:2109]	0.090801	0.074378	0.16613	0.011129	0	0	29.7699	4.89578	up
GO:0048341	paraxial mesoderm formation	biological_process	7	0.0810372	ENSRNOG00000015618	Wnt5a	Wnt family member 5A [Source:RGD Symbol;Acc:69250]	3.0348	2.5955	2.2052	6.68335	4.54321	6.14645	0.451016	-1.14875	down
GO:0060539	diaphragm development	biological_process	8	0.0810372	ENSRNOG00000056697	Kcnab1	potassium voltage-gated channel subfamily A member regulatory beta subunit 1 [Source:RGD Symbol;Acc:61827]	3.31095	2.45264	1.755	1.07741	1.03743	1.28351	2.21242	1.14563	up
GO:0043395	heparan sulfate proteoglycan binding	molecular_function	6	0.0810372	ENSRNOG00000011631	Fst	follistatin [Source:RGD Symbol;Acc:2633]	3.03205	2.47665	3.75114	7.03347	7.00825	7.06256	0.438766	-1.18848	down
GO:0032725	positive regulation of granulocyte macrophage colony-stimulating factor production	biological_process	8	0.0810372	ENSRNOG00000004649	Il1b	interleukin 1 beta [Source:RGD Symbol;Acc:2891]	20.4545	17.8629	26.638	9.01274	9.02768	13.4852	2.0604	1.04293	up
GO:0038036	sphingosine-1-phosphate receptor activity	molecular_function	8	0.0810372	ENSRNOG00000014524	S1pr3	sphingosine-1-phosphate receptor 3 [Source:RGD Symbol;Acc:1583843]	9.98579	9.09143	8.73488	22.3581	16.5395	25.1183	0.434456	-1.20272	down
GO:1902617	response to fluoride	biological_process	6	0.0810372	ENSRNOG00000003897	Col1a1	collagen type I alpha 1 chain [Source:RGD Symbol;Acc:61817]	21.9343	20.0594	21.0288	58.1167	63.4283	51.677	0.363825	-1.45869	down
GO:1990266	neutrophil migration	biological_process	7	0.0810372	ENSRNOG00000015089	Mcoln2	mucolipin 2 [Source:RGD Symbol;Acc:1308884]	7.1303	6.82353	5.88089	3.61028	2.8491	3.26985	2.03867	1.02763	up
GO:0009744	response to sucrose	biological_process	8	0.0810372	ENSRNOG00000001821	Adipoq	adiponectin, C1Q and collagen domain containing [Source:RGD Symbol;Acc:628748]	0.269142	0.528074	0.422021	2.31808	1.93395	13.321	0.0693811	-3.84931	down
GO:0001542	ovulation from ovarian follicle	biological_process	5	0.0810372	ENSRNOG00000045797	Lep	leptin [Source:RGD Symbol;Acc:3000]	0.038354	0.031345	0.037116	0.113483	0.270256	1.22499	0.0663972	-3.91273	down
GO:0050700	CARD domain binding	molecular_function	6	0.0810372	ENSRNOG00000047367	Card14	caspase recruitment domain family, member 14 [Source:RGD Symbol;Acc:1591135]	5.46672	4.5317	4.79579	2.63631	2.92656	1.73583	2.02697	1.01932	up
GO:0009266	response to temperature stimulus	biological_process	5	0.0810372	ENSRNOG00000003580	Ucp1	uncoupling protein 1 [Source:RGD Symbol;Acc:3931]	0	0	0	0	0	12.6582	2.37001e-05	-15.3647	down
GO:1904948	midbrain dopaminergic neuron differentiation	biological_process	8	0.0810372	ENSRNOG00000015618	Wnt5a	Wnt family member 5A [Source:RGD Symbol;Acc:69250]	3.0348	2.5955	2.2052	6.68335	4.54321	6.14645	0.451016	-1.14875	down
GO:0060371	regulation of atrial cardiac muscle cell membrane depolarization	biological_process	7	0.0810372	ENSRNOG00000057221	Scn3b	sodium voltage-gated channel beta subunit 3 [Source:RGD Symbol;Acc:621657]	21.0976	17.1091	25.2416	51.1686	32.1861	48.604	0.480819	-1.05643	down
GO:0050996	positive regulation of lipid catabolic process	biological_process	8	0.0810372	ENSRNOG00000004649	Il1b	interleukin 1 beta [Source:RGD Symbol;Acc:2891]	20.4545	17.8629	26.638	9.01274	9.02768	13.4852	2.0604	1.04293	up
GO:1901985	positive regulation of protein acetylation	biological_process	10	0.0810372	ENSRNOG00000014448	Arntl	aryl hydrocarbon receptor nuclear translocator-like [Source:RGD Symbol;Acc:62003]	12.2717	9.27036	6.63534	7.09622	2.94619	3.24836	2.12007	1.08411	up
GO:0034115	negative regulation of heterotypic cell-cell adhesion	biological_process	8	0.0810372	ENSRNOG00000001821	Adipoq	adiponectin, C1Q and collagen domain containing [Source:RGD Symbol;Acc:628748]	0.269142	0.528074	0.422021	2.31808	1.93395	13.321	0.0693811	-3.84931	down
GO:0001955	blood vessel maturation	biological_process	6	0.0810372	ENSRNOG00000016695	Mmp2	matrix metallopeptidase 2 [Source:RGD Symbol;Acc:621316]	30.7938	26.2646	32.2348	67.5082	55.093	74.8328	0.452269	-1.14475	down
GO:0003337	mesenchymal to epithelial transition involved in metanephros morphogenesis	biological_process	8	0.0810372	ENSRNOG00000026203	Pax8	paired box 8 [Source:RGD Symbol;Acc:620434]	0.878829	0.821269	0.820972	0.21796	0.383172	0.130189	3.44728	1.78546	up
GO:0006112	energy reserve metabolic process	biological_process	7	0.0810372	ENSRNOG00000045797	Lep	leptin [Source:RGD Symbol;Acc:3000]	0.038354	0.031345	0.037116	0.113483	0.270256	1.22499	0.0663972	-3.91273	down
GO:0097237	cellular response to toxic substance	biological_process	6	0.0810372	ENSRNOG00000008510	Abtb2	ankyrin repeat and BTB domain containing 2 [Source:RGD Symbol;Acc:620724]	0.679393	0.640205	1.12394	2.15888	1.403	2.01405	0.438229	-1.19024	down
GO:1903980	positive regulation of microglial cell activation	biological_process	9	0.0810372	ENSRNOG00000013578	Trem2	triggering receptor expressed on myeloid cells 2 [Source:RGD Symbol;Acc:1309841]	10.8948	5.01708	5.6079	3.19457	3.44342	4.12088	2.00019	1.00014	up
GO:0010941	regulation of cell death	biological_process	6	0.0810372	ENSRNOG00000051169	Clnk	cytokine-dependent hematopoietic cell linker [Source:RGD Symbol;Acc:1562417]	2.63507	7.08413	3.45371	1.51226	0.862768	2.10793	2.93844	1.55505	up
GO:1902260	negative regulation of delayed rectifier potassium channel activity	biological_process	10	0.0810372	ENSRNOG00000056697	Kcnab1	potassium voltage-gated channel subfamily A member regulatory beta subunit 1 [Source:RGD Symbol;Acc:61827]	3.31095	2.45264	1.755	1.07741	1.03743	1.28351	2.21242	1.14563	up
GO:0016266	O-glycan processing	biological_process	11	0.0810372	ENSRNOG00000005621	Gxylt2	glucoside xylosyltransferase 2 [Source:RGD Symbol;Acc:1586482]	0.546039	0.97027	0.96179	2.15225	1.64357	2.30024	0.406508	-1.29864	down
GO:1903288	positive regulation of potassium ion import across plasma membrane	biological_process	12	0.0810372	ENSRNOG00000016684	Wnk2	WNK lysine deficient protein kinase 2 [Source:RGD Symbol;Acc:1307284]	2.24948	2.78267	2.93501	1.49678	1.02756	1.17308	2.15479	1.10755	up
GO:0010766	negative regulation of sodium ion transport	biological_process	10	0.0810372	ENSRNOG00000016684	Wnk2	WNK lysine deficient protein kinase 2 [Source:RGD Symbol;Acc:1307284]	2.24948	2.78267	2.93501	1.49678	1.02756	1.17308	2.15479	1.10755	up
GO:0055078	sodium ion homeostasis	biological_process	10	0.0810372	ENSRNOG00000029342	Scn7a	sodium voltage-gated channel alpha subunit 7 [Source:RGD Symbol;Acc:61922]	11.5574	9.24312	13.5523	34.1139	29.6192	24.4067	0.389754	-1.35936	down
GO:0030867	rough endoplasmic reticulum membrane	cellular_component	6	0.0810372	ENSRNOG00000049351	Nat8l	N-acetyltransferase 8-like [Source:RGD Symbol;Acc:1305719]	0.414609	0.359825	0.569127	1.06015	0.774246	1.71601	0.378425	-1.40192	down
GO:0043270	positive regulation of ion transport	biological_process	8	0.0810372	ENSRNOG00000045797	Lep	leptin [Source:RGD Symbol;Acc:3000]	0.038354	0.031345	0.037116	0.113483	0.270256	1.22499	0.0663972	-3.91273	down
GO:0004033	aldo-keto reductase (NADP) activity	molecular_function	7	0.0810372	ENSRNOG00000056697	Kcnab1	potassium voltage-gated channel subfamily A member regulatory beta subunit 1 [Source:RGD Symbol;Acc:61827]	3.31095	2.45264	1.755	1.07741	1.03743	1.28351	2.21242	1.14563	up
GO:0034755	iron ion transmembrane transport	biological_process	11	0.0810372	ENSRNOG00000014398	Scara5	scavenger receptor class A, member 5 [Source:RGD Symbol;Acc:1306539]	2.21572	1.73413	2.82895	4.67709	3.10302	6.24355	0.483384	-1.04876	down
GO:0008046	axon guidance receptor activity	molecular_function	6	0.0810372	ENSRNOG00000007865	Ephb1	Eph receptor B1 [Source:RGD Symbol;Acc:2556]	0.836464	0.793073	1.14742	0.471882	0.398737	0.218471	2.5498	1.35038	up
GO:0048671	negative regulation of collateral sprouting	biological_process	8	0.0810372	ENSRNOG00000006565	Fstl4	follistatin-like 4 [Source:RGD Symbol;Acc:1307227]	1.13651	0.735415	0.132085	0.200113	0.165783	0.097167	4.32773	2.11361	up
GO:0051775	response to redox state	biological_process	4	0.0810372	ENSRNOG00000014448	Arntl	aryl hydrocarbon receptor nuclear translocator-like [Source:RGD Symbol;Acc:62003]	12.2717	9.27036	6.63534	7.09622	2.94619	3.24836	2.12007	1.08411	up
GO:0050919	negative chemotaxis	biological_process	6	0.083063	ENSRNOG00000003732	Flrt2	fibronectin leucine rich transmembrane protein 2 [Source:RGD Symbol;Acc:1308574]	1.80281	2.04289	1.39731	3.1207	4.03324	3.75719	0.480519	-1.05733	down
GO:0050919	negative chemotaxis	biological_process	6	0.083063	ENSRNOG00000015618	Wnt5a	Wnt family member 5A [Source:RGD Symbol;Acc:69250]	3.0348	2.5955	2.2052	6.68335	4.54321	6.14645	0.451016	-1.14875	down
GO:0032729	positive regulation of interferon-gamma production	biological_process	8	0.083063	ENSRNOG00000004649	Il1b	interleukin 1 beta [Source:RGD Symbol;Acc:2891]	20.4545	17.8629	26.638	9.01274	9.02768	13.4852	2.0604	1.04293	up
GO:0032729	positive regulation of interferon-gamma production	biological_process	8	0.083063	ENSRNOG00000015618	Wnt5a	Wnt family member 5A [Source:RGD Symbol;Acc:69250]	3.0348	2.5955	2.2052	6.68335	4.54321	6.14645	0.451016	-1.14875	down
GO:0071549	cellular response to dexamethasone stimulus	biological_process	7	0.090296	ENSRNOG00000013304	Arg1	arginase 1 [Source:RGD Symbol;Acc:2150]	14.1945	11.7175	9.74681	5.09255	6.15658	5.0671	2.18549	1.12795	up
GO:0071549	cellular response to dexamethasone stimulus	biological_process	7	0.090296	ENSRNOG00000028616	Pck1	phosphoenolpyruvate carboxykinase 1 [Source:RGD Symbol;Acc:3267]	0.294123	0.258891	0.731558	1.09133	1.59168	18.8392	0.0596858	-4.06647	down
GO:0071364	cellular response to epidermal growth factor stimulus	biological_process	6	0.090296	ENSRNOG00000003897	Col1a1	collagen type I alpha 1 chain [Source:RGD Symbol;Acc:61817]	21.9343	20.0594	21.0288	58.1167	63.4283	51.677	0.363825	-1.45869	down
GO:0071364	cellular response to epidermal growth factor stimulus	biological_process	6	0.090296	ENSRNOG00000014248	Erbb4	erb-b2 receptor tyrosine kinase 4 [Source:RGD Symbol;Acc:620486]	0.602772	0.820792	0.860173	0.247666	0.295959	0.240493	2.91249	1.54225	up
GO:0031406	carboxylic acid binding	molecular_function	6	0.0920674	ENSRNOG00000028616	Pck1	phosphoenolpyruvate carboxykinase 1 [Source:RGD Symbol;Acc:3267]	0.294123	0.258891	0.731558	1.09133	1.59168	18.8392	0.0596858	-4.06647	down
GO:0010642	negative regulation of platelet-derived growth factor receptor signaling pathway	biological_process	9	0.0920674	ENSRNOG00000001821	Adipoq	adiponectin, C1Q and collagen domain containing [Source:RGD Symbol;Acc:628748]	0.269142	0.528074	0.422021	2.31808	1.93395	13.321	0.0693811	-3.84931	down
GO:0043252	sodium-independent organic anion transport	biological_process	9	0.0920674	ENSRNOG00000036984	Slco1a1	solute carrier organic anion transporter family, member 1a1 [Source:RGD Symbol;Acc:3700]	0.270199	0.433603	0.341127	0.058162	0.110115	0.019966	5.55096	2.47274	up
GO:0006090	pyruvate metabolic process	biological_process	9	0.0920674	ENSRNOG00000028616	Pck1	phosphoenolpyruvate carboxykinase 1 [Source:RGD Symbol;Acc:3267]	0.294123	0.258891	0.731558	1.09133	1.59168	18.8392	0.0596858	-4.06647	down
GO:0070852	cell body fiber	cellular_component	6	0.0920674	ENSRNOG00000008943	Penk	proenkephalin [Source:RGD Symbol;Acc:68946]	1.132	1.55783	3.43566	0.621514	0.959967	0.863637	2.50519	1.32492	up
GO:0031960	response to corticosteroid	biological_process	7	0.0920674	ENSRNOG00000003897	Col1a1	collagen type I alpha 1 chain [Source:RGD Symbol;Acc:61817]	21.9343	20.0594	21.0288	58.1167	63.4283	51.677	0.363825	-1.45869	down
GO:0010042	response to manganese ion	biological_process	7	0.0920674	ENSRNOG00000013304	Arg1	arginase 1 [Source:RGD Symbol;Acc:2150]	14.1945	11.7175	9.74681	5.09255	6.15658	5.0671	2.18549	1.12795	up
GO:0014037	Schwann cell differentiation	biological_process	7	0.0920674	ENSRNOG00000011134	Lama2	laminin subunit alpha 2 [Source:RGD Symbol;Acc:1308889]	2.28319	2.43893	3.8991	6.65355	4.97214	6.4225	0.477678	-1.06589	down
GO:0032099	negative regulation of appetite	biological_process	11	0.0920674	ENSRNOG00000045797	Lep	leptin [Source:RGD Symbol;Acc:3000]	0.038354	0.031345	0.037116	0.113483	0.270256	1.22499	0.0663972	-3.91273	down
GO:0016494	C-X-C chemokine receptor activity	molecular_function	9	0.0920674	ENSRNOG00000048239	Cxcr1	C-X-C motif chemokine receptor 1 [Source:RGD Symbol;Acc:2905]	16.0266	13.947	11.851	5.02716	3.39089	4.10572	3.33962	1.73968	up
GO:1902808	positive regulation of cell cycle G1/S phase transition	biological_process	10	0.0920674	ENSRNOG00000025120	Gli1	GLI family zinc finger 1 [Source:RGD Symbol;Acc:621673]	0.698325	0.477126	0.544131	1.56395	1.68971	1.52278	0.360013	-1.47388	down
GO:0014009	glial cell proliferation	biological_process	4	0.0920674	ENSRNOG00000008943	Penk	proenkephalin [Source:RGD Symbol;Acc:68946]	1.132	1.55783	3.43566	0.621514	0.959967	0.863637	2.50519	1.32492	up
GO:0000002	mitochondrial genome maintenance	biological_process	7	0.0920674	ENSRNOG00000016949	Slc25a33	solute carrier family 25 member 33 [Source:RGD Symbol;Acc:1583942]	12.7926	13.8239	16.3486	29.8604	28.5655	33.4012	0.467891	-1.09576	down
GO:0019870	potassium channel inhibitor activity	molecular_function	7	0.0920674	ENSRNOG00000016684	Wnk2	WNK lysine deficient protein kinase 2 [Source:RGD Symbol;Acc:1307284]	2.24948	2.78267	2.93501	1.49678	1.02756	1.17308	2.15479	1.10755	up
GO:0051597	response to methylmercury	biological_process	6	0.0920674	ENSRNOG00000013304	Arg1	arginase 1 [Source:RGD Symbol;Acc:2150]	14.1945	11.7175	9.74681	5.09255	6.15658	5.0671	2.18549	1.12795	up
GO:0055123	digestive system development	biological_process	6	0.0920674	ENSRNOG00000004725	Cela1	chymotrypsin like elastase 1 [Source:RGD Symbol;Acc:2547]	25.6612	19.6849	15.4892	7.22067	12.5953	7.85221	2.19875	1.13668	up
GO:0001667	ameboidal-type cell migration	biological_process	7	0.0920674	ENSRNOG00000015618	Wnt5a	Wnt family member 5A [Source:RGD Symbol;Acc:69250]	3.0348	2.5955	2.2052	6.68335	4.54321	6.14645	0.451016	-1.14875	down
[truncated: 1,719 more rows]
