# Supplementary material for: Analysis of the Potential Relationship between Aging and Pulmonary Fibrosis Based on Transcriptome
Source: Life (Basel). 2022 Nov 23;12(12):1961. doi: 10.3390/life12121961 (PMC9788318; doi:10.3390/life12121961)
Supplement: Supplementary file 1 [file life-12-01961-s001.zip › Table S11-o-Sham vs y-Sham KEGG enrichment Gene of Figure S1B.xlsx]

## Sheet: Sheet1
pathway_id	pathway_name	pvalue	Gene_ID	Gene_name	KO_ENTRY	EC	Description	FPKM.O_Sham1	FPKM.O_Sham2	FPKM.O_Sham3	FPKM.Y_Sham1	FPKM.Y_Sham2	FPKM.Y_Sham3	fc	log2(fc)	regulation
ko04974	Protein digestion and absorption	1.51025e-06	ENSRNOG00000001249	Col6a1	K06238	NA	collagen type VI alpha 1 chain [Source:RGD Symbol;Acc:1565398]	46.125	44.8447	58.8249	100.324	89.8661	110.945	0.497433	-1.00743	down
ko04974	Protein digestion and absorption	1.51025e-06	ENSRNOG00000001469	Eln	K14211	NA	elastin [Source:RGD Symbol;Acc:67394]	73.1078	65.5134	68.0227	159.291	311.13	177.739	0.318816	-1.6492	down
ko04974	Protein digestion and absorption	1.51025e-06	ENSRNOG00000003357	Col3a1	K19720	NA	collagen type III alpha 1 chain [Source:RGD Symbol;Acc:71029]	156.474	148.568	159.465	332.712	580.742	362.723	0.363983	-1.45806	down
ko04974	Protein digestion and absorption	1.51025e-06	ENSRNOG00000003897	Col1a1	NA	NA	collagen type I alpha 1 chain [Source:RGD Symbol;Acc:61817]	21.9343	20.0594	21.0288	58.1167	63.4283	51.677	0.363825	-1.45869	down
ko04974	Protein digestion and absorption	1.51025e-06	ENSRNOG00000010935	Cpb2	K01300	EC:3.4.17.20	carboxypeptidase B2 [Source:RGD Symbol;Acc:71035]	0.244928	0.291876	0.095584	0	0	0	2107.96	11.0416	up
ko04974	Protein digestion and absorption	1.51025e-06	ENSRNOG00000011292	NEWGENE_621351	K06236	NA	collagen, type I, alpha 2 [Source:RGD Symbol;Acc:9452897]	39.3449	35.4719	44.7937	65.4149	127.389	75.4797	0.445837	-1.16541	down
ko04974	Protein digestion and absorption	1.51025e-06	ENSRNOG00000020579	Col7a1	K16628	NA	collagen type VII alpha 1 chain [Source:RGD Symbol;Acc:1311417]	1.88501	2.20626	1.57632	5.02032	3.67603	4.38121	0.433383	-1.20629	down
ko04974	Protein digestion and absorption	1.51025e-06	ENSRNOG00000039197	LOC108348074	K08135	NA	collagen alpha-1(XV) chain-like [Source:RGD Symbol;Acc:11464459]	2.9943	2.28433	4.771	10.5648	7.14882	12.7016	0.330415	-1.59765	down
ko04974	Protein digestion and absorption	1.51025e-06	ENSRNOG00000052925	NEWGENE_621351	K06236	NA	collagen, type I, alpha 2 [Source:RGD Symbol;Acc:9452897]	18.46	15.0008	14.0315	34.5066	31.6576	31.9137	0.48423	-1.04623	down
ko05146	Amoebiasis	2.62441e-06	ENSRNOG00000003357	Col3a1	K19720	NA	collagen type III alpha 1 chain [Source:RGD Symbol;Acc:71029]	156.474	148.568	159.465	332.712	580.742	362.723	0.363983	-1.45806	down
ko05146	Amoebiasis	2.62441e-06	ENSRNOG00000003897	Col1a1	NA	NA	collagen type I alpha 1 chain [Source:RGD Symbol;Acc:61817]	21.9343	20.0594	21.0288	58.1167	63.4283	51.677	0.363825	-1.45869	down
ko05146	Amoebiasis	2.62441e-06	ENSRNOG00000004649	Il1b	K04519	NA	interleukin 1 beta [Source:RGD Symbol;Acc:2891]	20.4545	17.8629	26.638	9.01274	9.02768	13.4852	2.0604	1.04293	up
ko05146	Amoebiasis	2.62441e-06	ENSRNOG00000010440	Gnal	NA	NA	G protein subunit alpha L [Source:RGD Symbol;Acc:2715]	1.49662	1.64004	1.25106	3.39378	2.09239	3.64563	0.480487	-1.05743	down
ko05146	Amoebiasis	2.62441e-06	ENSRNOG00000011134	Lama2	K05637	NA	laminin subunit alpha 2 [Source:RGD Symbol;Acc:1308889]	2.28319	2.43893	3.8991	6.65355	4.97214	6.4225	0.477678	-1.06589	down
ko05146	Amoebiasis	2.62441e-06	ENSRNOG00000011292	NEWGENE_621351	K06236	NA	collagen, type I, alpha 2 [Source:RGD Symbol;Acc:9452897]	39.3449	35.4719	44.7937	65.4149	127.389	75.4797	0.445837	-1.16541	down
ko05146	Amoebiasis	2.62441e-06	ENSRNOG00000013304	Arg1	K01476	EC:3.5.3.1	arginase 1 [Source:RGD Symbol;Acc:2150]	14.1945	11.7175	9.74681	5.09255	6.15658	5.0671	2.18549	1.12795	up
ko05146	Amoebiasis	2.62441e-06	ENSRNOG00000013736	C9	K04000	NA	complement C9 [Source:RGD Symbol;Acc:620319]	0.095381	0.17503	0.090134	1.08752	0.317408	0.991207	0.150469	-2.73246	down
ko05146	Amoebiasis	2.62441e-06	ENSRNOG00000052925	NEWGENE_621351	K06236	NA	collagen, type I, alpha 2 [Source:RGD Symbol;Acc:9452897]	18.46	15.0008	14.0315	34.5066	31.6576	31.9137	0.48423	-1.04623	down
ko03320	PPAR signaling pathway	4.35465e-05	ENSRNOG00000001821	Adipoq	K07296	NA	adiponectin, C1Q and collagen domain containing [Source:RGD Symbol;Acc:628748]	0.269142	0.528074	0.422021	2.31808	1.93395	13.321	0.0693811	-3.84931	down
ko03320	PPAR signaling pathway	4.35465e-05	ENSRNOG00000003580	Ucp1	K08769	NA	uncoupling protein 1 [Source:RGD Symbol;Acc:3931]	0	0	0	0	0	12.6582	2.37001e-05	-15.3647	down
ko03320	PPAR signaling pathway	4.35465e-05	ENSRNOG00000004537	Rxrg	K08526	NA	retinoid X receptor gamma [Source:RGD Symbol;Acc:620046]	1.28978	1.42628	2.23642	3.66221	2.84174	4.15561	0.464605	-1.10592	down
ko03320	PPAR signaling pathway	4.35465e-05	ENSRNOG00000009686	Aqp7	NA	NA	aquaporin 7 [Source:RGD Symbol;Acc:2145]	0.04156	0.071983	0.079689	0.169014	0.259968	3.27253	0.0522035	-4.25971	down
ko03320	PPAR signaling pathway	4.35465e-05	ENSRNOG00000015086	Plin1	K08768	NA	perilipin 1 [Source:RGD Symbol;Acc:3351]	0.0379376	0.130319	0.10534	0.403844	0.353187	6.83666	0.0360294	-4.79468	down
ko03320	PPAR signaling pathway	4.35465e-05	ENSRNOG00000028616	Pck1	K01596	EC:4.1.1.32	phosphoenolpyruvate carboxykinase 1 [Source:RGD Symbol;Acc:3267]	0.294123	0.258891	0.731558	1.09133	1.59168	18.8392	0.0596858	-4.06647	down
ko03320	PPAR signaling pathway	4.35465e-05	ENSRNOG00000047046	Plin4	K20254	NA	perilipin 4 [Source:RGD Symbol;Acc:1590867]	0.37018	0.405914	0.437357	0.759875	0.753192	1.7713	0.369463	-1.4365	down
ko04512	ECM-receptor interaction	0.000555314	ENSRNOG00000001249	Col6a1	K06238	NA	collagen type VI alpha 1 chain [Source:RGD Symbol;Acc:1565398]	46.125	44.8447	58.8249	100.324	89.8661	110.945	0.497433	-1.00743	down
ko04512	ECM-receptor interaction	0.000555314	ENSRNOG00000003897	Col1a1	NA	NA	collagen type I alpha 1 chain [Source:RGD Symbol;Acc:61817]	21.9343	20.0594	21.0288	58.1167	63.4283	51.677	0.363825	-1.45869	down
ko04512	ECM-receptor interaction	0.000555314	ENSRNOG00000006723	Itga11	K06587	NA	integrin subunit alpha 11 [Source:RGD Symbol;Acc:1311711]	0.445333	0.566447	0.898136	1.71316	1.51553	1.32386	0.419528	-1.25316	down
ko04512	ECM-receptor interaction	0.000555314	ENSRNOG00000011134	Lama2	K05637	NA	laminin subunit alpha 2 [Source:RGD Symbol;Acc:1308889]	2.28319	2.43893	3.8991	6.65355	4.97214	6.4225	0.477678	-1.06589	down
ko04512	ECM-receptor interaction	0.000555314	ENSRNOG00000011292	NEWGENE_621351	K06236	NA	collagen, type I, alpha 2 [Source:RGD Symbol;Acc:9452897]	39.3449	35.4719	44.7937	65.4149	127.389	75.4797	0.445837	-1.16541	down
ko04512	ECM-receptor interaction	0.000555314	ENSRNOG00000052925	NEWGENE_621351	K06236	NA	collagen, type I, alpha 2 [Source:RGD Symbol;Acc:9452897]	18.46	15.0008	14.0315	34.5066	31.6576	31.9137	0.48423	-1.04623	down
ko04152	AMPK signaling pathway	0.000794893	ENSRNOG00000001821	Adipoq	K07296	NA	adiponectin, C1Q and collagen domain containing [Source:RGD Symbol;Acc:628748]	0.269142	0.528074	0.422021	2.31808	1.93395	13.321	0.0693811	-3.84931	down
ko04152	AMPK signaling pathway	0.000794893	ENSRNOG00000017226	Slc2a4	K07191	NA	solute carrier family 2 member 4 [Source:RGD Symbol;Acc:2711]	0.725115	0.747971	0.866538	1.38289	1.35574	3.8632	0.35439	-1.49659	down
ko04152	AMPK signaling pathway	0.000794893	ENSRNOG00000018911	Pfkfb3	K01103	3.1.3.46;EC:2.7.1.105	6-phosphofructo-2-kinase/fructose-2,6-biphosphatase 3 [Source:RGD Symbol;Acc:619776]	19.8305	24.4373	25.5297	38.5041	62.3266	54.9695	0.447993	-1.15845	down
ko04152	AMPK signaling pathway	0.000794893	ENSRNOG00000028616	Pck1	K01596	EC:4.1.1.32	phosphoenolpyruvate carboxykinase 1 [Source:RGD Symbol;Acc:3267]	0.294123	0.258891	0.731558	1.09133	1.59168	18.8392	0.0596858	-4.06647	down
ko04152	AMPK signaling pathway	0.000794893	ENSRNOG00000045797	Lep	K05424	NA	leptin [Source:RGD Symbol;Acc:3000]	0.038354	0.031345	0.037116	0.113483	0.270256	1.22499	0.0663972	-3.91273	down
ko04152	AMPK signaling pathway	0.000794893	ENSRNOG00000055103	Cftr	K05031	EC:5.6.1.6	cystic fibrosis transmembrane conductance regulator [Source:RGD Symbol;Acc:2332]	1.14851	0.941143	0.718715	2.41175	2.46834	1.29678	0.454659	-1.13714	down
ko04152	AMPK signaling pathway	0.000794893	ENSRNOG00000058202	Ppp2r2c	K04354	NA	protein phosphatase 2, regulatory subunit B, gamma [Source:RGD Symbol;Acc:620920]	4.20679	3.12544	1.49505	1.3584	1.54719	1.00671	2.25629	1.17396	up
ko04060	Cytokine-cytokine receptor interaction	0.00136193	ENSRNOG00000002792	Cxcl2	K05505	NA	C-X-C motif chemokine ligand 2 [Source:RGD Symbol;Acc:70069]	2.49155	1.56141	2.22508	0.21844	0.639161	0.597588	4.31425	2.10911	up
ko04060	Cytokine-cytokine receptor interaction	0.00136193	ENSRNOG00000004649	Il1b	K04519	NA	interleukin 1 beta [Source:RGD Symbol;Acc:2891]	20.4545	17.8629	26.638	9.01274	9.02768	13.4852	2.0604	1.04293	up
ko04060	Cytokine-cytokine receptor interaction	0.00136193	ENSRNOG00000011984	Cxcl14	K10033	NA	C-X-C motif chemokine ligand 14 [Source:RGD Symbol;Acc:1307406]	17.269	9.0063	14.8414	32.6124	37.6915	54.0632	0.330608	-1.59681	down
ko04060	Cytokine-cytokine receptor interaction	0.00136193	ENSRNOG00000014265	Tnfrsf19	K05155	NA	TNF receptor superfamily member 19 [Source:RGD Symbol;Acc:1564996]	0.292562	0.18351	0.32382	1.07666	0.397136	0.799481	0.351867	-1.5069	down
ko04060	Cytokine-cytokine receptor interaction	0.00136193	ENSRNOG00000022242	Cxcl9	K05416	NA	C-X-C motif chemokine ligand 9 [Source:RGD Symbol;Acc:628798]	6.90616	5.99513	4.70513	2.639	3.00671	2.71353	2.10622	1.07466	up
ko04060	Cytokine-cytokine receptor interaction	0.00136193	ENSRNOG00000024899	Cxcl13	K10032	NA	C-X-C motif chemokine ligand 13 [Source:RGD Symbol;Acc:1564256]	0.505115	0.912997	2.0192	4.23093	3.68046	3.58254	0.299054	-1.74152	down
ko04060	Cytokine-cytokine receptor interaction	0.00136193	ENSRNOG00000028548	Ccl9	K22671	NA	chemokine (C-C motif) ligand 9 [Source:RGD Symbol;Acc:1310563]	37.5481	17.7937	27.4866	12.7972	13.0843	8.17364	2.43218	1.28225	up
ko04060	Cytokine-cytokine receptor interaction	0.00136193	ENSRNOG00000033209	Bmp8b	K16622	NA	bone morphogenetic protein 8b [Source:RGD Symbol;Acc:1591873]	1.03207	1.66145	1.31074	0.262554	0.64986	0.54328	2.75076	1.45983	up
ko04060	Cytokine-cytokine receptor interaction	0.00136193	ENSRNOG00000045797	Lep	K05424	NA	leptin [Source:RGD Symbol;Acc:3000]	0.038354	0.031345	0.037116	0.113483	0.270256	1.22499	0.0663972	-3.91273	down
ko04060	Cytokine-cytokine receptor interaction	0.00136193	ENSRNOG00000048239	Cxcr1	K04175	NA	C-X-C motif chemokine receptor 1 [Source:RGD Symbol;Acc:2905]	16.0266	13.947	11.851	5.02716	3.39089	4.10572	3.33962	1.73968	up
ko04933	AGE-RAGE signaling pathway in diabetic complications	0.00174625	ENSRNOG00000003357	Col3a1	K19720	NA	collagen type III alpha 1 chain [Source:RGD Symbol;Acc:71029]	156.474	148.568	159.465	332.712	580.742	362.723	0.363983	-1.45806	down
ko04933	AGE-RAGE signaling pathway in diabetic complications	0.00174625	ENSRNOG00000003897	Col1a1	NA	NA	collagen type I alpha 1 chain [Source:RGD Symbol;Acc:61817]	21.9343	20.0594	21.0288	58.1167	63.4283	51.677	0.363825	-1.45869	down
ko04933	AGE-RAGE signaling pathway in diabetic complications	0.00174625	ENSRNOG00000004649	Il1b	K04519	NA	interleukin 1 beta [Source:RGD Symbol;Acc:2891]	20.4545	17.8629	26.638	9.01274	9.02768	13.4852	2.0604	1.04293	up
ko04933	AGE-RAGE signaling pathway in diabetic complications	0.00174625	ENSRNOG00000011292	NEWGENE_621351	K06236	NA	collagen, type I, alpha 2 [Source:RGD Symbol;Acc:9452897]	39.3449	35.4719	44.7937	65.4149	127.389	75.4797	0.445837	-1.16541	down
ko04933	AGE-RAGE signaling pathway in diabetic complications	0.00174625	ENSRNOG00000016695	Mmp2	K01398	EC:3.4.24.24	matrix metallopeptidase 2 [Source:RGD Symbol;Acc:621316]	30.7938	26.2646	32.2348	67.5082	55.093	74.8328	0.452269	-1.14475	down
ko04933	AGE-RAGE signaling pathway in diabetic complications	0.00174625	ENSRNOG00000052925	NEWGENE_621351	K06236	NA	collagen, type I, alpha 2 [Source:RGD Symbol;Acc:9452897]	18.46	15.0008	14.0315	34.5066	31.6576	31.9137	0.48423	-1.04623	down
ko04920	Adipocytokine signaling pathway	0.00181997	ENSRNOG00000001821	Adipoq	K07296	NA	adiponectin, C1Q and collagen domain containing [Source:RGD Symbol;Acc:628748]	0.269142	0.528074	0.422021	2.31808	1.93395	13.321	0.0693811	-3.84931	down
ko04920	Adipocytokine signaling pathway	0.00181997	ENSRNOG00000004537	Rxrg	K08526	NA	retinoid X receptor gamma [Source:RGD Symbol;Acc:620046]	1.28978	1.42628	2.23642	3.66221	2.84174	4.15561	0.464605	-1.10592	down
ko04920	Adipocytokine signaling pathway	0.00181997	ENSRNOG00000017226	Slc2a4	K07191	NA	solute carrier family 2 member 4 [Source:RGD Symbol;Acc:2711]	0.725115	0.747971	0.866538	1.38289	1.35574	3.8632	0.35439	-1.49659	down
ko04920	Adipocytokine signaling pathway	0.00181997	ENSRNOG00000028616	Pck1	K01596	EC:4.1.1.32	phosphoenolpyruvate carboxykinase 1 [Source:RGD Symbol;Acc:3267]	0.294123	0.258891	0.731558	1.09133	1.59168	18.8392	0.0596858	-4.06647	down
ko04920	Adipocytokine signaling pathway	0.00181997	ENSRNOG00000045797	Lep	K05424	NA	leptin [Source:RGD Symbol;Acc:3000]	0.038354	0.031345	0.037116	0.113483	0.270256	1.22499	0.0663972	-3.91273	down
ko04151	PI3K-Akt signaling pathway	0.00290856	ENSRNOG00000001249	Col6a1	K06238	NA	collagen type VI alpha 1 chain [Source:RGD Symbol;Acc:1565398]	46.125	44.8447	58.8249	100.324	89.8661	110.945	0.497433	-1.00743	down
ko04151	PI3K-Akt signaling pathway	0.00290856	ENSRNOG00000003897	Col1a1	NA	NA	collagen type I alpha 1 chain [Source:RGD Symbol;Acc:61817]	21.9343	20.0594	21.0288	58.1167	63.4283	51.677	0.363825	-1.45869	down
ko04151	PI3K-Akt signaling pathway	0.00290856	ENSRNOG00000005650	Pgf	K16859	NA	placental growth factor [Source:RGD Symbol;Acc:619850]	1.81335	1.74628	1.74662	2.71735	7.21811	5.43133	0.345306	-1.53405	down
ko04151	PI3K-Akt signaling pathway	0.00290856	ENSRNOG00000006723	Itga11	K06587	NA	integrin subunit alpha 11 [Source:RGD Symbol;Acc:1311711]	0.445333	0.566447	0.898136	1.71316	1.51553	1.32386	0.419528	-1.25316	down
ko04151	PI3K-Akt signaling pathway	0.00290856	ENSRNOG00000011134	Lama2	K05637	NA	laminin subunit alpha 2 [Source:RGD Symbol;Acc:1308889]	2.28319	2.43893	3.8991	6.65355	4.97214	6.4225	0.477678	-1.06589	down
ko04151	PI3K-Akt signaling pathway	0.00290856	ENSRNOG00000011292	NEWGENE_621351	K06236	NA	collagen, type I, alpha 2 [Source:RGD Symbol;Acc:9452897]	39.3449	35.4719	44.7937	65.4149	127.389	75.4797	0.445837	-1.16541	down
ko04151	PI3K-Akt signaling pathway	0.00290856	ENSRNOG00000014248	Erbb4	K05085	EC:2.7.10.1	erb-b2 receptor tyrosine kinase 4 [Source:RGD Symbol;Acc:620486]	0.602772	0.820792	0.860173	0.247666	0.295959	0.240493	2.91249	1.54225	up
ko04151	PI3K-Akt signaling pathway	0.00290856	ENSRNOG00000016696	Angpt2	K05466	NA	angiopoietin 2 [Source:RGD Symbol;Acc:621861]	3.01199	2.77709	3.05503	7.45684	6.76239	7.96137	0.398732	-1.32651	down
ko04151	PI3K-Akt signaling pathway	0.00290856	ENSRNOG00000028616	Pck1	K01596	EC:4.1.1.32	phosphoenolpyruvate carboxykinase 1 [Source:RGD Symbol;Acc:3267]	0.294123	0.258891	0.731558	1.09133	1.59168	18.8392	0.0596858	-4.06647	down
ko04151	PI3K-Akt signaling pathway	0.00290856	ENSRNOG00000052925	NEWGENE_621351	K06236	NA	collagen, type I, alpha 2 [Source:RGD Symbol;Acc:9452897]	18.46	15.0008	14.0315	34.5066	31.6576	31.9137	0.48423	-1.04623	down
ko04151	PI3K-Akt signaling pathway	0.00290856	ENSRNOG00000058202	Ppp2r2c	K04354	NA	protein phosphatase 2, regulatory subunit B, gamma [Source:RGD Symbol;Acc:620920]	4.20679	3.12544	1.49505	1.3584	1.54719	1.00671	2.25629	1.17396	up
ko04080	Neuroactive ligand-receptor interaction	0.00433834	ENSRNOG00000008943	Penk	K18832	NA	proenkephalin [Source:RGD Symbol;Acc:68946]	1.132	1.55783	3.43566	0.621514	0.959967	0.863637	2.50519	1.32492	up
ko04080	Neuroactive ligand-receptor interaction	0.00433834	ENSRNOG00000010603	Gzma	K01352	EC:3.4.21.78	granzyme A [Source:RGD Symbol;Acc:628640]	37.3725	72.5884	41.9582	18.3746	12.8989	25.6912	2.6669	1.41516	up
ko04080	Neuroactive ligand-receptor interaction	0.00433834	ENSRNOG00000012674	Adrb3	K04143	NA	adrenoceptor beta 3 [Source:RGD Symbol;Acc:2061]	0	0	0	0.089852	0.041841	1.01731	0.000261096	-11.9031	down
ko04080	Neuroactive ligand-receptor interaction	0.00433834	ENSRNOG00000013887	Adra2b	K04139	NA	adrenoceptor alpha 2B [Source:RGD Symbol;Acc:2057]	0.311704	0.246273	0.182689	0.886988	0.676955	1.17461	0.270458	-1.88652	down
ko04080	Neuroactive ligand-receptor interaction	0.00433834	ENSRNOG00000014524	S1pr3	K04290	NA	sphingosine-1-phosphate receptor 3 [Source:RGD Symbol;Acc:1583843]	9.98579	9.09143	8.73488	22.3581	16.5395	25.1183	0.434456	-1.20272	down
ko04080	Neuroactive ligand-receptor interaction	0.00433834	ENSRNOG00000018899	C5	K03994	NA	complement C5 [Source:RGD Symbol;Acc:2237]	1.41673	11.2071	0.792005	0.351361	0.325713	0.313456	13.5441	3.7596	up
ko04080	Neuroactive ligand-receptor interaction	0.00433834	ENSRNOG00000021256	Adra1d	NA	NA	adrenoceptor alpha 1D [Source:RGD Symbol;Acc:62064]	0.263536	0.619624	0.355989	1.74131	1.36148	1.17567	0.289625	-1.78774	down
ko04080	Neuroactive ligand-receptor interaction	0.00433834	ENSRNOG00000032417	Gabrp	K05189	NA	gamma-aminobutyric acid type A receptor pi subunit [Source:RGD Symbol;Acc:620532]	0.092348	0.19525	0.36241	0.951681	0.704935	1.06596	0.238747	-2.06644	down
ko04080	Neuroactive ligand-receptor interaction	0.00433834	ENSRNOG00000045797	Lep	K05424	NA	leptin [Source:RGD Symbol;Acc:3000]	0.038354	0.031345	0.037116	0.113483	0.270256	1.22499	0.0663972	-3.91273	down
ko04080	Neuroactive ligand-receptor interaction	0.00433834	ENSRNOG00000048145	Sstr1	K04217	NA	somatostatin receptor 1 [Source:RGD Symbol;Acc:3762]	1.29021	1.61171	1.86831	0.504885	0.640927	0.601976	2.72929	1.44853	up
ko04926	Relaxin signaling pathway	0.00541951	ENSRNOG00000003357	Col3a1	K19720	NA	collagen type III alpha 1 chain [Source:RGD Symbol;Acc:71029]	156.474	148.568	159.465	332.712	580.742	362.723	0.363983	-1.45806	down
ko04926	Relaxin signaling pathway	0.00541951	ENSRNOG00000003897	Col1a1	NA	NA	collagen type I alpha 1 chain [Source:RGD Symbol;Acc:61817]	21.9343	20.0594	21.0288	58.1167	63.4283	51.677	0.363825	-1.45869	down
ko04926	Relaxin signaling pathway	0.00541951	ENSRNOG00000011292	NEWGENE_621351	K06236	NA	collagen, type I, alpha 2 [Source:RGD Symbol;Acc:9452897]	39.3449	35.4719	44.7937	65.4149	127.389	75.4797	0.445837	-1.16541	down
ko04926	Relaxin signaling pathway	0.00541951	ENSRNOG00000016695	Mmp2	K01398	EC:3.4.24.24	matrix metallopeptidase 2 [Source:RGD Symbol;Acc:621316]	30.7938	26.2646	32.2348	67.5082	55.093	74.8328	0.452269	-1.14475	down
ko04926	Relaxin signaling pathway	0.00541951	ENSRNOG00000052925	NEWGENE_621351	K06236	NA	collagen, type I, alpha 2 [Source:RGD Symbol;Acc:9452897]	18.46	15.0008	14.0315	34.5066	31.6576	31.9137	0.48423	-1.04623	down
ko04926	Relaxin signaling pathway	0.00541951	ENSRNOG00000058039	Acta2	K12313	NA	actin alpha 2, smooth muscle [Source:RGD Symbol;Acc:621676]	74.1844	84.8511	106.259	171.41	140.048	239.067	0.481892	-1.05322	down
ko05020	Prion diseases	0.00807501	ENSRNOG00000004649	Il1b	K04519	NA	interleukin 1 beta [Source:RGD Symbol;Acc:2891]	20.4545	17.8629	26.638	9.01274	9.02768	13.4852	2.0604	1.04293	up
ko05020	Prion diseases	0.00807501	ENSRNOG00000013736	C9	K04000	NA	complement C9 [Source:RGD Symbol;Acc:620319]	0.095381	0.17503	0.090134	1.08752	0.317408	0.991207	0.150469	-2.73246	down
ko05020	Prion diseases	0.00807501	ENSRNOG00000018899	C5	K03994	NA	complement C5 [Source:RGD Symbol;Acc:2237]	1.41673	11.2071	0.792005	0.351361	0.325713	0.313456	13.5441	3.7596	up
ko05165	Human papillomavirus infection	0.00945141	ENSRNOG00000001249	Col6a1	K06238	NA	collagen type VI alpha 1 chain [Source:RGD Symbol;Acc:1565398]	46.125	44.8447	58.8249	100.324	89.8661	110.945	0.497433	-1.00743	down
ko05165	Human papillomavirus infection	0.00945141	ENSRNOG00000003897	Col1a1	NA	NA	collagen type I alpha 1 chain [Source:RGD Symbol;Acc:61817]	21.9343	20.0594	21.0288	58.1167	63.4283	51.677	0.363825	-1.45869	down
ko05165	Human papillomavirus infection	0.00945141	ENSRNOG00000006723	Itga11	K06587	NA	integrin subunit alpha 11 [Source:RGD Symbol;Acc:1311711]	0.445333	0.566447	0.898136	1.71316	1.51553	1.32386	0.419528	-1.25316	down
ko05165	Human papillomavirus infection	0.00945141	ENSRNOG00000011134	Lama2	K05637	NA	laminin subunit alpha 2 [Source:RGD Symbol;Acc:1308889]	2.28319	2.43893	3.8991	6.65355	4.97214	6.4225	0.477678	-1.06589	down
ko05165	Human papillomavirus infection	0.00945141	ENSRNOG00000011292	NEWGENE_621351	K06236	NA	collagen, type I, alpha 2 [Source:RGD Symbol;Acc:9452897]	39.3449	35.4719	44.7937	65.4149	127.389	75.4797	0.445837	-1.16541	down
ko05165	Human papillomavirus infection	0.00945141	ENSRNOG00000015318	Heyl	K09091	NA	hes-related family bHLH transcription factor with YRPW motif-like [Source:RGD Symbol;Acc:1305022]	2.94339	2.74707	3.0413	7.51638	10.985	9.78336	0.308709	-1.69568	down
ko05165	Human papillomavirus infection	0.00945141	ENSRNOG00000015618	Wnt5a	K00444	NA	Wnt family member 5A [Source:RGD Symbol;Acc:69250]	3.0348	2.5955	2.2052	6.68335	4.54321	6.14645	0.451016	-1.14875	down
ko05165	Human papillomavirus infection	0.00945141	ENSRNOG00000049590	RT1-M2	K06751	NA	RT1 class Ib, locus M2 [Source:RGD Symbol;Acc:3493]	1.05738	0.72803	0.844597	0.257868	0	0.133657	6.71734	2.74789	up
ko05165	Human papillomavirus infection	0.00945141	ENSRNOG00000052925	NEWGENE_621351	K06236	NA	collagen, type I, alpha 2 [Source:RGD Symbol;Acc:9452897]	18.46	15.0008	14.0315	34.5066	31.6576	31.9137	0.48423	-1.04623	down
ko05165	Human papillomavirus infection	0.00945141	ENSRNOG00000058202	Ppp2r2c	K04354	NA	protein phosphatase 2, regulatory subunit B, gamma [Source:RGD Symbol;Acc:620920]	4.20679	3.12544	1.49505	1.3584	1.54719	1.00671	2.25629	1.17396	up
ko04510	Focal adhesion	0.0125836	ENSRNOG00000001249	Col6a1	K06238	NA	collagen type VI alpha 1 chain [Source:RGD Symbol;Acc:1565398]	46.125	44.8447	58.8249	100.324	89.8661	110.945	0.497433	-1.00743	down
ko04510	Focal adhesion	0.0125836	ENSRNOG00000003897	Col1a1	NA	NA	collagen type I alpha 1 chain [Source:RGD Symbol;Acc:61817]	21.9343	20.0594	21.0288	58.1167	63.4283	51.677	0.363825	-1.45869	down
ko04510	Focal adhesion	0.0125836	ENSRNOG00000005650	Pgf	K16859	NA	placental growth factor [Source:RGD Symbol;Acc:619850]	1.81335	1.74628	1.74662	2.71735	7.21811	5.43133	0.345306	-1.53405	down
ko04510	Focal adhesion	0.0125836	ENSRNOG00000006723	Itga11	K06587	NA	integrin subunit alpha 11 [Source:RGD Symbol;Acc:1311711]	0.445333	0.566447	0.898136	1.71316	1.51553	1.32386	0.419528	-1.25316	down
ko04510	Focal adhesion	0.0125836	ENSRNOG00000011134	Lama2	K05637	NA	laminin subunit alpha 2 [Source:RGD Symbol;Acc:1308889]	2.28319	2.43893	3.8991	6.65355	4.97214	6.4225	0.477678	-1.06589	down
ko04510	Focal adhesion	0.0125836	ENSRNOG00000011292	NEWGENE_621351	K06236	NA	collagen, type I, alpha 2 [Source:RGD Symbol;Acc:9452897]	39.3449	35.4719	44.7937	65.4149	127.389	75.4797	0.445837	-1.16541	down
ko04510	Focal adhesion	0.0125836	ENSRNOG00000052925	NEWGENE_621351	K06236	NA	collagen, type I, alpha 2 [Source:RGD Symbol;Acc:9452897]	18.46	15.0008	14.0315	34.5066	31.6576	31.9137	0.48423	-1.04623	down
ko04062	Chemokine signaling pathway	0.024636	ENSRNOG00000002792	Cxcl2	K05505	NA	C-X-C motif chemokine ligand 2 [Source:RGD Symbol;Acc:70069]	2.49155	1.56141	2.22508	0.21844	0.639161	0.597588	4.31425	2.10911	up
ko04062	Chemokine signaling pathway	0.024636	ENSRNOG00000011984	Cxcl14	K10033	NA	C-X-C motif chemokine ligand 14 [Source:RGD Symbol;Acc:1307406]	17.269	9.0063	14.8414	32.6124	37.6915	54.0632	0.330608	-1.59681	down
ko04062	Chemokine signaling pathway	0.024636	ENSRNOG00000022242	Cxcl9	K05416	NA	C-X-C motif chemokine ligand 9 [Source:RGD Symbol;Acc:628798]	6.90616	5.99513	4.70513	2.639	3.00671	2.71353	2.10622	1.07466	up
ko04062	Chemokine signaling pathway	0.024636	ENSRNOG00000024899	Cxcl13	K10032	NA	C-X-C motif chemokine ligand 13 [Source:RGD Symbol;Acc:1564256]	0.505115	0.912997	2.0192	4.23093	3.68046	3.58254	0.299054	-1.74152	down
ko04062	Chemokine signaling pathway	0.024636	ENSRNOG00000028548	Ccl9	K22671	NA	chemokine (C-C motif) ligand 9 [Source:RGD Symbol;Acc:1310563]	37.5481	17.7937	27.4866	12.7972	13.0843	8.17364	2.43218	1.28225	up
ko04062	Chemokine signaling pathway	0.024636	ENSRNOG00000048239	Cxcr1	K04175	NA	C-X-C motif chemokine receptor 1 [Source:RGD Symbol;Acc:2905]	16.0266	13.947	11.851	5.02716	3.39089	4.10572	3.33962	1.73968	up
ko04360	Axon guidance	0.0258518	ENSRNOG00000007865	Ephb1	K05110	EC:2.7.10.1	Eph receptor B1 [Source:RGD Symbol;Acc:2556]	0.836464	0.793073	1.14742	0.471882	0.398737	0.218471	2.5498	1.35038	up
ko04360	Axon guidance	0.0258518	ENSRNOG00000007882	Ablim2	K07520	NA	actin binding LIM protein family, member 2 [Source:RGD Symbol;Acc:1303094]	5.05697	6.39863	4.19886	2.42415	2.89972	1.57184	2.27017	1.1828	up
ko04360	Axon guidance	0.0258518	ENSRNOG00000008098	Lrrc4	K16351	NA	leucine rich repeat containing 4 [Source:RGD Symbol;Acc:1560026]	2.17239	1.99758	2.53782	5.27277	4.10377	5.20253	0.460097	-1.11999	down
ko04360	Axon guidance	0.0258518	ENSRNOG00000011133	Trpc4	K04967	NA	transient receptor potential cation channel, subfamily C, member 4 [Source:RGD Symbol;Acc:621276]	0.047885	0.130389	0.050748	0.258961	0.381343	0.332957	0.235314	-2.08734	down
ko04360	Axon guidance	0.0258518	ENSRNOG00000015618	Wnt5a	K00444	NA	Wnt family member 5A [Source:RGD Symbol;Acc:69250]	3.0348	2.5955	2.2052	6.68335	4.54321	6.14645	0.451016	-1.14875	down
ko04360	Axon guidance	0.0258518	ENSRNOG00000016070	Trpc3	K04966	NA	transient receptor potential cation channel, subfamily C, member 3 [Source:RGD Symbol;Acc:61973]	0.998502	0.698946	0.823061	2.01864	2.08611	2.63759	0.373833	-1.41954	down
ko05332	Graft-versus-host disease	0.0262078	ENSRNOG00000004649	Il1b	K04519	NA	interleukin 1 beta [Source:RGD Symbol;Acc:2891]	20.4545	17.8629	26.638	9.01274	9.02768	13.4852	2.0604	1.04293	up
ko05332	Graft-versus-host disease	0.0262078	ENSRNOG00000049590	RT1-M2	K06751	NA	RT1 class Ib, locus M2 [Source:RGD Symbol;Acc:3493]	1.05738	0.72803	0.844597	0.257868	0	0.133657	6.71734	2.74789	up
ko05332	Graft-versus-host disease	0.0262078	ENSRNOG00000060246	Klrd1	K06516	NA	killer cell lectin like receptor D1 [Source:RGD Symbol;Acc:2978]	13.655	21.5233	11.2525	7.56228	4.74204	9.73844	2.1064	1.07478	up
ko04923	Regulation of lipolysis in adipocytes	0.0318551	ENSRNOG00000009686	Aqp7	NA	NA	aquaporin 7 [Source:RGD Symbol;Acc:2145]	0.04156	0.071983	0.079689	0.169014	0.259968	3.27253	0.0522035	-4.25971	down
ko04923	Regulation of lipolysis in adipocytes	0.0318551	ENSRNOG00000012674	Adrb3	K04143	NA	adrenoceptor beta 3 [Source:RGD Symbol;Acc:2061]	0	0	0	0.089852	0.041841	1.01731	0.000261096	-11.9031	down
ko04923	Regulation of lipolysis in adipocytes	0.0318551	ENSRNOG00000015086	Plin1	K08768	NA	perilipin 1 [Source:RGD Symbol;Acc:3351]	0.0379376	0.130319	0.10534	0.403844	0.353187	6.83666	0.0360294	-4.79468	down
ko04610	Complement and coagulation cascades	0.0686423	ENSRNOG00000010935	Cpb2	K01300	EC:3.4.17.20	carboxypeptidase B2 [Source:RGD Symbol;Acc:71035]	0.244928	0.291876	0.095584	0	0	0	2107.96	11.0416	up
ko04610	Complement and coagulation cascades	0.0686423	ENSRNOG00000013736	C9	K04000	NA	complement C9 [Source:RGD Symbol;Acc:620319]	0.095381	0.17503	0.090134	1.08752	0.317408	0.991207	0.150469	-2.73246	down
ko04610	Complement and coagulation cascades	0.0686423	ENSRNOG00000018899	C5	K03994	NA	complement C5 [Source:RGD Symbol;Acc:2237]	1.41673	11.2071	0.792005	0.351361	0.325713	0.313456	13.5441	3.7596	up
ko04611	Platelet activation	0.0762949	ENSRNOG00000003357	Col3a1	K19720	NA	collagen type III alpha 1 chain [Source:RGD Symbol;Acc:71029]	156.474	148.568	159.465	332.712	580.742	362.723	0.363983	-1.45806	down
ko04611	Platelet activation	0.0762949	ENSRNOG00000003897	Col1a1	NA	NA	collagen type I alpha 1 chain [Source:RGD Symbol;Acc:61817]	21.9343	20.0594	21.0288	58.1167	63.4283	51.677	0.363825	-1.45869	down
ko04611	Platelet activation	0.0762949	ENSRNOG00000011292	NEWGENE_621351	K06236	NA	collagen, type I, alpha 2 [Source:RGD Symbol;Acc:9452897]	39.3449	35.4719	44.7937	65.4149	127.389	75.4797	0.445837	-1.16541	down
ko04611	Platelet activation	0.0762949	ENSRNOG00000052925	NEWGENE_621351	K06236	NA	collagen, type I, alpha 2 [Source:RGD Symbol;Acc:9452897]	18.46	15.0008	14.0315	34.5066	31.6576	31.9137	0.48423	-1.04623	down
ko05216	Thyroid cancer	0.0827055	ENSRNOG00000004537	Rxrg	K08526	NA	retinoid X receptor gamma [Source:RGD Symbol;Acc:620046]	1.28978	1.42628	2.23642	3.66221	2.84174	4.15561	0.464605	-1.10592	down
ko05216	Thyroid cancer	0.0827055	ENSRNOG00000026203	Pax8	K09293	NA	paired box 8 [Source:RGD Symbol;Acc:620434]	0.878829	0.821269	0.820972	0.21796	0.383172	0.130189	3.44728	1.78546	up
ko04064	NF-kappa B signaling pathway	0.107307	ENSRNOG00000002792	Cxcl2	K05505	NA	C-X-C motif chemokine ligand 2 [Source:RGD Symbol;Acc:70069]	2.49155	1.56141	2.22508	0.21844	0.639161	0.597588	4.31425	2.10911	up
ko04064	NF-kappa B signaling pathway	0.107307	ENSRNOG00000004649	Il1b	K04519	NA	interleukin 1 beta [Source:RGD Symbol;Acc:2891]	20.4545	17.8629	26.638	9.01274	9.02768	13.4852	2.0604	1.04293	up
ko04064	NF-kappa B signaling pathway	0.107307	ENSRNOG00000047367	Card14	K20913	NA	caspase recruitment domain family, member 14 [Source:RGD Symbol;Acc:1591135]	5.46672	4.5317	4.79579	2.63631	2.92656	1.73583	2.02697	1.01932	up
ko04930	Type II diabetes mellitus	0.118403	ENSRNOG00000001821	Adipoq	K07296	NA	adiponectin, C1Q and collagen domain containing [Source:RGD Symbol;Acc:628748]	0.269142	0.528074	0.422021	2.31808	1.93395	13.321	0.0693811	-3.84931	down
ko04930	Type II diabetes mellitus	0.118403	ENSRNOG00000017226	Slc2a4	K07191	NA	solute carrier family 2 member 4 [Source:RGD Symbol;Acc:2711]	0.725115	0.747971	0.866538	1.38289	1.35574	3.8632	0.35439	-1.49659	down
ko04972	Pancreatic secretion	0.129217	ENSRNOG00000010935	Cpb2	K01300	EC:3.4.17.20	carboxypeptidase B2 [Source:RGD Symbol;Acc:71035]	0.244928	0.291876	0.095584	0	0	0	2107.96	11.0416	up
ko04972	Pancreatic secretion	0.129217	ENSRNOG00000055103	Cftr	K05031	EC:5.6.1.6	cystic fibrosis transmembrane conductance regulator [Source:RGD Symbol;Acc:2332]	1.14851	0.941143	0.718715	2.41175	2.46834	1.29678	0.454659	-1.13714	down
ko04972	Pancreatic secretion	0.129217	ENSRNOG00000060831	Clca1	K05027	NA	chloride channel accessory 1 [Source:RGD Symbol;Acc:1306258]	0.066168	0.138958	0.180644	1.43964	0.094998	1.08019	0.147532	-2.7609	down
ko05142	Chagas disease (American trypanosomiasis)	0.137817	ENSRNOG00000004649	Il1b	K04519	NA	interleukin 1 beta [Source:RGD Symbol;Acc:2891]	20.4545	17.8629	26.638	9.01274	9.02768	13.4852	2.0604	1.04293	up
ko05142	Chagas disease (American trypanosomiasis)	0.137817	ENSRNOG00000010440	Gnal	NA	NA	G protein subunit alpha L [Source:RGD Symbol;Acc:2715]	1.49662	1.64004	1.25106	3.39378	2.09239	3.64563	0.480487	-1.05743	down
ko05142	Chagas disease (American trypanosomiasis)	0.137817	ENSRNOG00000058202	Ppp2r2c	K04354	NA	protein phosphatase 2, regulatory subunit B, gamma [Source:RGD Symbol;Acc:620920]	4.20679	3.12544	1.49505	1.3584	1.54719	1.00671	2.25629	1.17396	up
ko05134	Legionellosis	0.148333	ENSRNOG00000002792	Cxcl2	K05505	NA	C-X-C motif chemokine ligand 2 [Source:RGD Symbol;Acc:70069]	2.49155	1.56141	2.22508	0.21844	0.639161	0.597588	4.31425	2.10911	up
ko05134	Legionellosis	0.148333	ENSRNOG00000004649	Il1b	K04519	NA	interleukin 1 beta [Source:RGD Symbol;Acc:2891]	20.4545	17.8629	26.638	9.01274	9.02768	13.4852	2.0604	1.04293	up
ko00830	Retinol metabolism	0.170554	ENSRNOG00000019500	Cyp1a1	K07408	EC:1.14.14.1	cytochrome P450, family 1, subfamily a, polypeptide 1 [Source:RGD Symbol;Acc:2458]	1.30617	2.01733	6.01601	22.1476	22.9681	33.3498	0.119027	-3.07064	down
ko00830	Retinol metabolism	0.170554	ENSRNOG00000029651	LOC100365958	K11154	EC:1.1.1.-	retinol dehydrogenase 16 [Source:RGD Symbol;Acc:735050]	2.33885	2.37969	2.79162	0.971761	1.17616	1.091	2.31872	1.21333	up
ko04940	Type I diabetes mellitus	0.170554	ENSRNOG00000004649	Il1b	K04519	NA	interleukin 1 beta [Source:RGD Symbol;Acc:2891]	20.4545	17.8629	26.638	9.01274	9.02768	13.4852	2.0604	1.04293	up
ko04940	Type I diabetes mellitus	0.170554	ENSRNOG00000049590	RT1-M2	K06751	NA	RT1 class Ib, locus M2 [Source:RGD Symbol;Acc:3493]	1.05738	0.72803	0.844597	0.257868	0	0.133657	6.71734	2.74789	up
ko00910	Nitrogen metabolism	0.184124	ENSRNOG00000010079	Ca3	K01672	EC:4.2.1.1	carbonic anhydrase 3 [Source:RGD Symbol;Acc:2241]	2.52678	4.82757	3.94699	10.1675	12.1564	43.507	0.171672	-2.54227	down
ko05217	Basal cell carcinoma	0.188709	ENSRNOG00000015618	Wnt5a	K00444	NA	Wnt family member 5A [Source:RGD Symbol;Acc:69250]	3.0348	2.5955	2.2052	6.68335	4.54321	6.14645	0.451016	-1.14875	down
ko05217	Basal cell carcinoma	0.188709	ENSRNOG00000025120	Gli1	K16797	NA	GLI family zinc finger 1 [Source:RGD Symbol;Acc:621673]	0.698325	0.477126	0.544131	1.56395	1.68971	1.52278	0.360013	-1.47388	down
ko04020	Calcium signaling pathway	0.197355	ENSRNOG00000010440	Gnal	NA	NA	G protein subunit alpha L [Source:RGD Symbol;Acc:2715]	1.49662	1.64004	1.25106	3.39378	2.09239	3.64563	0.480487	-1.05743	down
ko04020	Calcium signaling pathway	0.197355	ENSRNOG00000012674	Adrb3	K04143	NA	adrenoceptor beta 3 [Source:RGD Symbol;Acc:2061]	0	0	0	0.089852	0.041841	1.01731	0.000261096	-11.9031	down
ko04020	Calcium signaling pathway	0.197355	ENSRNOG00000014248	Erbb4	K05085	EC:2.7.10.1	erb-b2 receptor tyrosine kinase 4 [Source:RGD Symbol;Acc:620486]	0.602772	0.820792	0.860173	0.247666	0.295959	0.240493	2.91249	1.54225	up
ko04020	Calcium signaling pathway	0.197355	ENSRNOG00000021256	Adra1d	NA	NA	adrenoceptor alpha 1D [Source:RGD Symbol;Acc:62064]	0.263536	0.619624	0.355989	1.74131	1.36148	1.17567	0.289625	-1.78774	down
ko04742	Taste transduction	0.207118	ENSRNOG00000005268	Gnat3	K19729	NA	G protein subunit alpha transducin 3 [Source:RGD Symbol;Acc:727817]	1.06101	0.850564	1.51812	3.70113	2.49755	4.15072	0.331391	-1.5934	down
ko04742	Taste transduction	0.207118	ENSRNOG00000020484	Trpm5	K04980	NA	transient receptor potential cation channel, subfamily M, member 5 [Source:RGD Symbol;Acc:1310620]	5.99927	5.86911	10.0597	17.4263	11.9153	18.1559	0.461669	-1.11507	down
ko00220	Arginine biosynthesis	0.214708	ENSRNOG00000013304	Arg1	K01476	EC:3.5.3.1	arginase 1 [Source:RGD Symbol;Acc:2150]	14.1945	11.7175	9.74681	5.09255	6.15658	5.0671	2.18549	1.12795	up
ko05133	Pertussis	0.221051	ENSRNOG00000004649	Il1b	K04519	NA	interleukin 1 beta [Source:RGD Symbol;Acc:2891]	20.4545	17.8629	26.638	9.01274	9.02768	13.4852	2.0604	1.04293	up
ko05133	Pertussis	0.221051	ENSRNOG00000018899	C5	K03994	NA	complement C5 [Source:RGD Symbol;Acc:2237]	1.41673	11.2071	0.792005	0.351361	0.325713	0.313456	13.5441	3.7596	up
ko04918	Thyroid hormone synthesis	0.221051	ENSRNOG00000026203	Pax8	K09293	NA	paired box 8 [Source:RGD Symbol;Acc:620434]	0.878829	0.821269	0.820972	0.21796	0.383172	0.130189	3.44728	1.78546	up
ko04918	Thyroid hormone synthesis	0.221051	ENSRNOG00000058692	Slc26a4	NA	NA	solute carrier family 26 member 4 [Source:RGD Symbol;Acc:3293]	2.67212	1.9953	1.15691	1.03707	0.715431	0.934049	2.16796	1.11634	up
ko04728	Dopaminergic synapse	0.222498	ENSRNOG00000010440	Gnal	NA	NA	G protein subunit alpha L [Source:RGD Symbol;Acc:2715]	1.49662	1.64004	1.25106	3.39378	2.09239	3.64563	0.480487	-1.05743	down
ko04728	Dopaminergic synapse	0.222498	ENSRNOG00000014448	Arntl	NA	NA	aryl hydrocarbon receptor nuclear translocator-like [Source:RGD Symbol;Acc:62003]	12.2717	9.27036	6.63534	7.09622	2.94619	3.24836	2.12007	1.08411	up
ko04728	Dopaminergic synapse	0.222498	ENSRNOG00000058202	Ppp2r2c	K04354	NA	protein phosphatase 2, regulatory subunit B, gamma [Source:RGD Symbol;Acc:620920]	4.20679	3.12544	1.49505	1.3584	1.54719	1.00671	2.25629	1.17396	up
ko00532	Glycosaminoglycan biosynthesis - chondroitin sulfate / dermatan sulfate	0.224648	ENSRNOG00000000572	Chst3	K01020	EC:2.8.2.17	carbohydrate sulfotransferase 3 [Source:RGD Symbol;Acc:620355]	1.16179	1.79049	1.49114	6.49275	3.57535	2.86355	0.343608	-1.54116	down
ko04924	Renin secretion	0.230383	ENSRNOG00000012674	Adrb3	K04143	NA	adrenoceptor beta 3 [Source:RGD Symbol;Acc:2061]	0	0	0	0.089852	0.041841	1.01731	0.000261096	-11.9031	down
ko04924	Renin secretion	0.230383	ENSRNOG00000060831	Clca1	K05027	NA	chloride channel accessory 1 [Source:RGD Symbol;Acc:1306258]	0.066168	0.138958	0.180644	1.43964	0.094998	1.08019	0.147532	-2.7609	down
ko05412	Arrhythmogenic right ventricular cardiomyopathy (ARVC)	0.230383	ENSRNOG00000006723	Itga11	K06587	NA	integrin subunit alpha 11 [Source:RGD Symbol;Acc:1311711]	0.445333	0.566447	0.898136	1.71316	1.51553	1.32386	0.419528	-1.25316	down
ko05412	Arrhythmogenic right ventricular cardiomyopathy (ARVC)	0.230383	ENSRNOG00000011134	Lama2	K05637	NA	laminin subunit alpha 2 [Source:RGD Symbol;Acc:1308889]	2.28319	2.43893	3.8991	6.65355	4.97214	6.4225	0.477678	-1.06589	down
ko04964	Proximal tubule bicarbonate reclamation	0.234464	ENSRNOG00000028616	Pck1	K01596	EC:4.1.1.32	phosphoenolpyruvate carboxykinase 1 [Source:RGD Symbol;Acc:3267]	0.294123	0.258891	0.731558	1.09133	1.59168	18.8392	0.0596858	-4.06647	down
ko04970	Salivary secretion	0.23506	ENSRNOG00000012674	Adrb3	K04143	NA	adrenoceptor beta 3 [Source:RGD Symbol;Acc:2061]	0	0	0	0.089852	0.041841	1.01731	0.000261096	-11.9031	down
ko04970	Salivary secretion	0.23506	ENSRNOG00000021256	Adra1d	NA	NA	adrenoceptor alpha 1D [Source:RGD Symbol;Acc:62064]	0.263536	0.619624	0.355989	1.74131	1.36148	1.17567	0.289625	-1.78774	down
ko05416	Viral myocarditis	0.239743	ENSRNOG00000011134	Lama2	K05637	NA	laminin subunit alpha 2 [Source:RGD Symbol;Acc:1308889]	2.28319	2.43893	3.8991	6.65355	4.97214	6.4225	0.477678	-1.06589	down
ko05416	Viral myocarditis	0.239743	ENSRNOG00000049590	RT1-M2	K06751	NA	RT1 class Ib, locus M2 [Source:RGD Symbol;Acc:3493]	1.05738	0.72803	0.844597	0.257868	0	0.133657	6.71734	2.74789	up
ko00514	Other types of O-glycan biosynthesis	0.244157	ENSRNOG00000005621	Gxylt2	K13676	EC:2.4.2.-	glucoside xylosyltransferase 2 [Source:RGD Symbol;Acc:1586482]	0.546039	0.97027	0.96179	2.15225	1.64357	2.30024	0.406508	-1.29864	down
ko04024	cAMP signaling pathway	0.245581	ENSRNOG00000025120	Gli1	K16797	NA	GLI family zinc finger 1 [Source:RGD Symbol;Acc:621673]	0.698325	0.477126	0.544131	1.56395	1.68971	1.52278	0.360013	-1.47388	down
ko04024	cAMP signaling pathway	0.245581	ENSRNOG00000026661	Hcar1	K08401	NA	hydroxycarboxylic acid receptor 1 [Source:RGD Symbol;Acc:1586364]	0	0	0.029443	0.149024	0.059517	0.789164	0.0295107	-5.08262	down
ko04024	cAMP signaling pathway	0.245581	ENSRNOG00000048145	Sstr1	K04217	NA	somatostatin receptor 1 [Source:RGD Symbol;Acc:3762]	1.29021	1.61171	1.86831	0.504885	0.640927	0.601976	2.72929	1.44853	up
ko04024	cAMP signaling pathway	0.245581	ENSRNOG00000055103	Cftr	K05031	EC:5.6.1.6	cystic fibrosis transmembrane conductance regulator [Source:RGD Symbol;Acc:2332]	1.14851	0.941143	0.718715	2.41175	2.46834	1.29678	0.454659	-1.13714	down
ko04371	Apelin signaling pathway	0.249392	ENSRNOG00000003580	Ucp1	K08769	NA	uncoupling protein 1 [Source:RGD Symbol;Acc:3931]	0	0	0	0	0	12.6582	2.37001e-05	-15.3647	down
ko04371	Apelin signaling pathway	0.249392	ENSRNOG00000015086	Plin1	K08768	NA	perilipin 1 [Source:RGD Symbol;Acc:3351]	0.0379376	0.130319	0.10534	0.403844	0.353187	6.83666	0.0360294	-4.79468	down
ko04371	Apelin signaling pathway	0.249392	ENSRNOG00000058039	Acta2	K12313	NA	actin alpha 2, smooth muscle [Source:RGD Symbol;Acc:621676]	74.1844	84.8511	106.259	171.41	140.048	239.067	0.481892	-1.05322	down
ko04261	Adrenergic signaling in cardiomyocytes	0.263028	ENSRNOG00000021256	Adra1d	NA	NA	adrenoceptor alpha 1D [Source:RGD Symbol;Acc:62064]	0.263536	0.619624	0.355989	1.74131	1.36148	1.17567	0.289625	-1.78774	down
ko04261	Adrenergic signaling in cardiomyocytes	0.263028	ENSRNOG00000029342	Scn7a	K04839	NA	sodium voltage-gated channel alpha subunit 7 [Source:RGD Symbol;Acc:61922]	11.5574	9.24312	13.5523	34.1139	29.6192	24.4067	0.389754	-1.35936	down
ko04261	Adrenergic signaling in cardiomyocytes	0.263028	ENSRNOG00000058202	Ppp2r2c	K04354	NA	protein phosphatase 2, regulatory subunit B, gamma [Source:RGD Symbol;Acc:620920]	4.20679	3.12544	1.49505	1.3584	1.54719	1.00671	2.25629	1.17396	up
ko04612	Antigen processing and presentation	0.267914	ENSRNOG00000049590	RT1-M2	K06751	NA	RT1 class Ib, locus M2 [Source:RGD Symbol;Acc:3493]	1.05738	0.72803	0.844597	0.257868	0	0.133657	6.71734	2.74789	up
ko04612	Antigen processing and presentation	0.267914	ENSRNOG00000060246	Klrd1	K06516	NA	killer cell lectin like receptor D1 [Source:RGD Symbol;Acc:2978]	13.655	21.5233	11.2525	7.56228	4.74204	9.73844	2.1064	1.07478	up
ko05132	Salmonella infection	0.267914	ENSRNOG00000002792	Cxcl2	K05505	NA	C-X-C motif chemokine ligand 2 [Source:RGD Symbol;Acc:70069]	2.49155	1.56141	2.22508	0.21844	0.639161	0.597588	4.31425	2.10911	up
ko05132	Salmonella infection	0.267914	ENSRNOG00000004649	Il1b	K04519	NA	interleukin 1 beta [Source:RGD Symbol;Acc:2891]	20.4545	17.8629	26.638	9.01274	9.02768	13.4852	2.0604	1.04293	up
ko00512	Mucin type O-glycan biosynthesis	0.281731	ENSRNOG00000007951	Galnt14	K00710	EC:2.4.1.41	polypeptide N-acetylgalactosaminyltransferase 14 [Source:RGD Symbol;Acc:1310068]	1.22288	1.53036	1.57812	0.196292	0.565801	0.096151	5.04677	2.33536	up
ko05410	Hypertrophic cardiomyopathy (HCM)	0.2914	ENSRNOG00000006723	Itga11	K06587	NA	integrin subunit alpha 11 [Source:RGD Symbol;Acc:1311711]	0.445333	0.566447	0.898136	1.71316	1.51553	1.32386	0.419528	-1.25316	down
ko05410	Hypertrophic cardiomyopathy (HCM)	0.2914	ENSRNOG00000011134	Lama2	K05637	NA	laminin subunit alpha 2 [Source:RGD Symbol;Acc:1308889]	2.28319	2.43893	3.8991	6.65355	4.97214	6.4225	0.477678	-1.06589	down
ko04727	GABAergic synapse	0.300775	ENSRNOG00000027767	Slc38a5	K14992	NA	solute carrier family 38, member 5 [Source:RGD Symbol;Acc:620702]	3.29864	4.26098	4.74245	7.87061	7.30095	9.9667	0.489376	-1.03098	down
ko04727	GABAergic synapse	0.300775	ENSRNOG00000032417	Gabrp	K05189	NA	gamma-aminobutyric acid type A receptor pi subunit [Source:RGD Symbol;Acc:620532]	0.092348	0.19525	0.36241	0.951681	0.704935	1.06596	0.238747	-2.06644	down
ko04390	Hippo signaling pathway	0.300961	ENSRNOG00000015618	Wnt5a	K00444	NA	Wnt family member 5A [Source:RGD Symbol;Acc:69250]	3.0348	2.5955	2.2052	6.68335	4.54321	6.14645	0.451016	-1.14875	down
ko04390	Hippo signaling pathway	0.300961	ENSRNOG00000033209	Bmp8b	K16622	NA	bone morphogenetic protein 8b [Source:RGD Symbol;Acc:1591873]	1.03207	1.66145	1.31074	0.262554	0.64986	0.54328	2.75076	1.45983	up
ko04390	Hippo signaling pathway	0.300961	ENSRNOG00000058202	Ppp2r2c	K04354	NA	protein phosphatase 2, regulatory subunit B, gamma [Source:RGD Symbol;Acc:620920]	4.20679	3.12544	1.49505	1.3584	1.54719	1.00671	2.25629	1.17396	up
ko04932	Non-alcoholic fatty liver disease (NAFLD)	0.30443	ENSRNOG00000001821	Adipoq	K07296	NA	adiponectin, C1Q and collagen domain containing [Source:RGD Symbol;Acc:628748]	0.269142	0.528074	0.422021	2.31808	1.93395	13.321	0.0693811	-3.84931	down
ko04932	Non-alcoholic fatty liver disease (NAFLD)	0.30443	ENSRNOG00000004649	Il1b	K04519	NA	interleukin 1 beta [Source:RGD Symbol;Acc:2891]	20.4545	17.8629	26.638	9.01274	9.02768	13.4852	2.0604	1.04293	up
ko04932	Non-alcoholic fatty liver disease (NAFLD)	0.30443	ENSRNOG00000045797	Lep	K05424	NA	leptin [Source:RGD Symbol;Acc:3000]	0.038354	0.031345	0.037116	0.113483	0.270256	1.22499	0.0663972	-3.91273	down
ko04514	Cell adhesion molecules (CAMs)	0.307901	ENSRNOG00000008098	Lrrc4	K16351	NA	leucine rich repeat containing 4 [Source:RGD Symbol;Acc:1560026]	2.17239	1.99758	2.53782	5.27277	4.10377	5.20253	0.460097	-1.11999	down
ko04514	Cell adhesion molecules (CAMs)	0.307901	ENSRNOG00000010263	Cldn11	K06087	NA	claudin 11 [Source:RGD Symbol;Acc:71081]	2.68847	2.864	2.8561	5.43847	8.61906	7.68507	0.386732	-1.37059	down
ko04514	Cell adhesion molecules (CAMs)	0.307901	ENSRNOG00000049590	RT1-M2	K06751	NA	RT1 class Ib, locus M2 [Source:RGD Symbol;Acc:3493]	1.05738	0.72803	0.844597	0.257868	0	0.133657	6.71734	2.74789	up
ko04620	Toll-like receptor signaling pathway	0.310131	ENSRNOG00000004649	Il1b	K04519	NA	interleukin 1 beta [Source:RGD Symbol;Acc:2891]	20.4545	17.8629	26.638	9.01274	9.02768	13.4852	2.0604	1.04293	up
ko04620	Toll-like receptor signaling pathway	0.310131	ENSRNOG00000022242	Cxcl9	K05416	NA	C-X-C motif chemokine ligand 9 [Source:RGD Symbol;Acc:628798]	6.90616	5.99513	4.70513	2.639	3.00671	2.71353	2.10622	1.07466	up
ko05414	Dilated cardiomyopathy (DCM)	0.310131	ENSRNOG00000006723	Itga11	K06587	NA	integrin subunit alpha 11 [Source:RGD Symbol;Acc:1311711]	0.445333	0.566447	0.898136	1.71316	1.51553	1.32386	0.419528	-1.25316	down
ko05414	Dilated cardiomyopathy (DCM)	0.310131	ENSRNOG00000011134	Lama2	K05637	NA	laminin subunit alpha 2 [Source:RGD Symbol;Acc:1308889]	2.28319	2.43893	3.8991	6.65355	4.97214	6.4225	0.477678	-1.06589	down
ko04010	MAPK signaling pathway	0.310888	ENSRNOG00000004649	Il1b	K04519	NA	interleukin 1 beta [Source:RGD Symbol;Acc:2891]	20.4545	17.8629	26.638	9.01274	9.02768	13.4852	2.0604	1.04293	up
ko04010	MAPK signaling pathway	0.310888	ENSRNOG00000005650	Pgf	K16859	NA	placental growth factor [Source:RGD Symbol;Acc:619850]	1.81335	1.74628	1.74662	2.71735	7.21811	5.43133	0.345306	-1.53405	down
ko04010	MAPK signaling pathway	0.310888	ENSRNOG00000014248	Erbb4	K05085	EC:2.7.10.1	erb-b2 receptor tyrosine kinase 4 [Source:RGD Symbol;Acc:620486]	0.602772	0.820792	0.860173	0.247666	0.295959	0.240493	2.91249	1.54225	up
ko04010	MAPK signaling pathway	0.310888	ENSRNOG00000016696	Angpt2	K05466	NA	angiopoietin 2 [Source:RGD Symbol;Acc:621861]	3.01199	2.77709	3.05503	7.45684	6.76239	7.96137	0.398732	-1.32651	down
ko04010	MAPK signaling pathway	0.310888	ENSRNOG00000032828	Mapk8ip2	K04435	NA	mitogen-activated protein kinase 8 interacting protein 2 [Source:RGD Symbol;Acc:1309727]	0	0.011052	0	0.164696	0.033483	0.104562	0.0365065	-4.7757	down
ko04710	Circadian rhythm	0.317456	ENSRNOG00000014448	Arntl	NA	NA	aryl hydrocarbon receptor nuclear translocator-like [Source:RGD Symbol;Acc:62003]	12.2717	9.27036	6.63534	7.09622	2.94619	3.24836	2.12007	1.08411	up
ko05222	Small cell lung cancer	0.319463	ENSRNOG00000004537	Rxrg	K08526	NA	retinoid X receptor gamma [Source:RGD Symbol;Acc:620046]	1.28978	1.42628	2.23642	3.66221	2.84174	4.15561	0.464605	-1.10592	down
ko05222	Small cell lung cancer	0.319463	ENSRNOG00000011134	Lama2	K05637	NA	laminin subunit alpha 2 [Source:RGD Symbol;Acc:1308889]	2.28319	2.43893	3.8991	6.65355	4.97214	6.4225	0.477678	-1.06589	down
ko04657	IL-17 signaling pathway	0.324119	ENSRNOG00000002792	Cxcl2	K05505	NA	C-X-C motif chemokine ligand 2 [Source:RGD Symbol;Acc:70069]	2.49155	1.56141	2.22508	0.21844	0.639161	0.597588	4.31425	2.10911	up
ko04657	IL-17 signaling pathway	0.324119	ENSRNOG00000004649	Il1b	K04519	NA	interleukin 1 beta [Source:RGD Symbol;Acc:2891]	20.4545	17.8629	26.638	9.01274	9.02768	13.4852	2.0604	1.04293	up
ko01523	Antifolate resistance	0.326109	ENSRNOG00000004649	Il1b	K04519	NA	interleukin 1 beta [Source:RGD Symbol;Acc:2891]	20.4545	17.8629	26.638	9.01274	9.02768	13.4852	2.0604	1.04293	up
ko00020	Citrate cycle (TCA cycle)	0.326109	ENSRNOG00000028616	Pck1	K01596	EC:4.1.1.32	phosphoenolpyruvate carboxykinase 1 [Source:RGD Symbol;Acc:3267]	0.294123	0.258891	0.731558	1.09133	1.59168	18.8392	0.0596858	-4.06647	down
ko05200	Pathways in cancer	0.327912	ENSRNOG00000004537	Rxrg	K08526	NA	retinoid X receptor gamma [Source:RGD Symbol;Acc:620046]	1.28978	1.42628	2.23642	3.66221	2.84174	4.15561	0.464605	-1.10592	down
ko05200	Pathways in cancer	0.327912	ENSRNOG00000005650	Pgf	K16859	NA	placental growth factor [Source:RGD Symbol;Acc:619850]	1.81335	1.74628	1.74662	2.71735	7.21811	5.43133	0.345306	-1.53405	down
ko05200	Pathways in cancer	0.327912	ENSRNOG00000011134	Lama2	K05637	NA	laminin subunit alpha 2 [Source:RGD Symbol;Acc:1308889]	2.28319	2.43893	3.8991	6.65355	4.97214	6.4225	0.477678	-1.06589	down
ko05200	Pathways in cancer	0.327912	ENSRNOG00000015318	Heyl	K09091	NA	hes-related family bHLH transcription factor with YRPW motif-like [Source:RGD Symbol;Acc:1305022]	2.94339	2.74707	3.0413	7.51638	10.985	9.78336	0.308709	-1.69568	down
ko05200	Pathways in cancer	0.327912	ENSRNOG00000015618	Wnt5a	K00444	NA	Wnt family member 5A [Source:RGD Symbol;Acc:69250]	3.0348	2.5955	2.2052	6.68335	4.54321	6.14645	0.451016	-1.14875	down
ko05200	Pathways in cancer	0.327912	ENSRNOG00000016695	Mmp2	K01398	EC:3.4.24.24	matrix metallopeptidase 2 [Source:RGD Symbol;Acc:621316]	30.7938	26.2646	32.2348	67.5082	55.093	74.8328	0.452269	-1.14475	down
ko05200	Pathways in cancer	0.327912	ENSRNOG00000025120	Gli1	K16797	NA	GLI family zinc finger 1 [Source:RGD Symbol;Acc:621673]	0.698325	0.477126	0.544131	1.56395	1.68971	1.52278	0.360013	-1.47388	down
ko05200	Pathways in cancer	0.327912	ENSRNOG00000026203	Pax8	K09293	NA	paired box 8 [Source:RGD Symbol;Acc:620434]	0.878829	0.821269	0.820972	0.21796	0.383172	0.130189	3.44728	1.78546	up
ko04350	TGF-beta signaling pathway	0.328767	ENSRNOG00000011631	Fst	K04661	NA	follistatin [Source:RGD Symbol;Acc:2633]	3.03205	2.47665	3.75114	7.03347	7.00825	7.06256	0.438766	-1.18848	down
ko04350	TGF-beta signaling pathway	0.328767	ENSRNOG00000033209	Bmp8b	K16622	NA	bone morphogenetic protein 8b [Source:RGD Symbol;Acc:1591873]	1.03207	1.66145	1.31074	0.262554	0.64986	0.54328	2.75076	1.45983	up
ko04530	Tight junction	0.339189	ENSRNOG00000010263	Cldn11	K06087	NA	claudin 11 [Source:RGD Symbol;Acc:71081]	2.68847	2.864	2.8561	5.43847	8.61906	7.68507	0.386732	-1.37059	down
ko04530	Tight junction	0.339189	ENSRNOG00000055103	Cftr	K05031	EC:5.6.1.6	cystic fibrosis transmembrane conductance regulator [Source:RGD Symbol;Acc:2332]	1.14851	0.941143	0.718715	2.41175	2.46834	1.29678	0.454659	-1.13714	down
ko04530	Tight junction	0.339189	ENSRNOG00000058202	Ppp2r2c	K04354	NA	protein phosphatase 2, regulatory subunit B, gamma [Source:RGD Symbol;Acc:620920]	4.20679	3.12544	1.49505	1.3584	1.54719	1.00671	2.25629	1.17396	up
ko04714	Thermogenesis	0.33929	ENSRNOG00000003580	Ucp1	K08769	NA	uncoupling protein 1 [Source:RGD Symbol;Acc:3931]	0	0	0	0	0	12.6582	2.37001e-05	-15.3647	down
ko04714	Thermogenesis	0.33929	ENSRNOG00000012674	Adrb3	K04143	NA	adrenoceptor beta 3 [Source:RGD Symbol;Acc:2061]	0	0	0	0.089852	0.041841	1.01731	0.000261096	-11.9031	down
ko04714	Thermogenesis	0.33929	ENSRNOG00000015086	Plin1	K08768	NA	perilipin 1 [Source:RGD Symbol;Acc:3351]	0.0379376	0.130319	0.10534	0.403844	0.353187	6.83666	0.0360294	-4.79468	down
ko04714	Thermogenesis	0.33929	ENSRNOG00000033209	Bmp8b	K16622	NA	bone morphogenetic protein 8b [Source:RGD Symbol;Acc:1591873]	1.03207	1.66145	1.31074	0.262554	0.64986	0.54328	2.75076	1.45983	up
ko00250	Alanine, aspartate and glutamate metabolism	0.343091	ENSRNOG00000049351	Nat8l	K18309	EC:2.3.1.17	N-acetyltransferase 8-like [Source:RGD Symbol;Acc:1305719]	0.414609	0.359825	0.569127	1.06015	0.774246	1.71601	0.378425	-1.40192	down
ko04022	cGMP-PKG signaling pathway	0.346141	ENSRNOG00000012674	Adrb3	K04143	NA	adrenoceptor beta 3 [Source:RGD Symbol;Acc:2061]	0	0	0	0.089852	0.041841	1.01731	0.000261096	-11.9031	down
ko04022	cGMP-PKG signaling pathway	0.346141	ENSRNOG00000013887	Adra2b	K04139	NA	adrenoceptor alpha 2B [Source:RGD Symbol;Acc:2057]	0.311704	0.246273	0.182689	0.886988	0.676955	1.17461	0.270458	-1.88652	down
ko04022	cGMP-PKG signaling pathway	0.346141	ENSRNOG00000021256	Adra1d	NA	NA	adrenoceptor alpha 1D [Source:RGD Symbol;Acc:62064]	0.263536	0.619624	0.355989	1.74131	1.36148	1.17567	0.289625	-1.78774	down
ko00051	Fructose and mannose metabolism	0.35965	ENSRNOG00000018911	Pfkfb3	K01103	3.1.3.46;EC:2.7.1.105	6-phosphofructo-2-kinase/fructose-2,6-biphosphatase 3 [Source:RGD Symbol;Acc:619776]	19.8305	24.4373	25.5297	38.5041	62.3266	54.9695	0.447993	-1.15845	down
ko04066	HIF-1 signaling pathway	0.361043	ENSRNOG00000016696	Angpt2	K05466	NA	angiopoietin 2 [Source:RGD Symbol;Acc:621861]	3.01199	2.77709	3.05503	7.45684	6.76239	7.96137	0.398732	-1.32651	down
ko04066	HIF-1 signaling pathway	0.361043	ENSRNOG00000018911	Pfkfb3	K01103	3.1.3.46;EC:2.7.1.105	6-phosphofructo-2-kinase/fructose-2,6-biphosphatase 3 [Source:RGD Symbol;Acc:619776]	19.8305	24.4373	25.5297	38.5041	62.3266	54.9695	0.447993	-1.15845	down
ko05033	Nicotine addiction	0.367774	ENSRNOG00000032417	Gabrp	K05189	NA	gamma-aminobutyric acid type A receptor pi subunit [Source:RGD Symbol;Acc:620532]	0.092348	0.19525	0.36241	0.951681	0.704935	1.06596	0.238747	-2.06644	down
ko04659	Th17 cell differentiation	0.37471	ENSRNOG00000004537	Rxrg	K08526	NA	retinoid X receptor gamma [Source:RGD Symbol;Acc:620046]	1.28978	1.42628	2.23642	3.66221	2.84174	4.15561	0.464605	-1.10592	down
ko04659	Th17 cell differentiation	0.37471	ENSRNOG00000004649	Il1b	K04519	NA	interleukin 1 beta [Source:RGD Symbol;Acc:2891]	20.4545	17.8629	26.638	9.01274	9.02768	13.4852	2.0604	1.04293	up
ko04973	Carbohydrate digestion and absorption	0.375796	ENSRNOG00000005268	Gnat3	K19729	NA	G protein subunit alpha transducin 3 [Source:RGD Symbol;Acc:727817]	1.06101	0.850564	1.51812	3.70113	2.49755	4.15072	0.331391	-1.5934	down
ko00620	Pyruvate metabolism	0.383718	ENSRNOG00000028616	Pck1	K01596	EC:4.1.1.32	phosphoenolpyruvate carboxykinase 1 [Source:RGD Symbol;Acc:3267]	0.294123	0.258891	0.731558	1.09133	1.59168	18.8392	0.0596858	-4.06647	down
ko05143	African trypanosomiasis	0.383718	ENSRNOG00000004649	Il1b	K04519	NA	interleukin 1 beta [Source:RGD Symbol;Acc:2891]	20.4545	17.8629	26.638	9.01274	9.02768	13.4852	2.0604	1.04293	up
ko05219	Bladder cancer	0.383718	ENSRNOG00000016695	Mmp2	K01398	EC:3.4.24.24	matrix metallopeptidase 2 [Source:RGD Symbol;Acc:621316]	30.7938	26.2646	32.2348	67.5082	55.093	74.8328	0.452269	-1.14475	down
ko04931	Insulin resistance	0.383758	ENSRNOG00000017226	Slc2a4	K07191	NA	solute carrier family 2 member 4 [Source:RGD Symbol;Acc:2711]	0.725115	0.747971	0.866538	1.38289	1.35574	3.8632	0.35439	-1.49659	down
ko04931	Insulin resistance	0.383758	ENSRNOG00000028616	Pck1	K01596	EC:4.1.1.32	phosphoenolpyruvate carboxykinase 1 [Source:RGD Symbol;Acc:3267]	0.294123	0.258891	0.731558	1.09133	1.59168	18.8392	0.0596858	-4.06647	down
ko04668	TNF signaling pathway	0.397225	ENSRNOG00000002792	Cxcl2	K05505	NA	C-X-C motif chemokine ligand 2 [Source:RGD Symbol;Acc:70069]	2.49155	1.56141	2.22508	0.21844	0.639161	0.597588	4.31425	2.10911	up
ko04668	TNF signaling pathway	0.397225	ENSRNOG00000004649	Il1b	K04519	NA	interleukin 1 beta [Source:RGD Symbol;Acc:2891]	20.4545	17.8629	26.638	9.01274	9.02768	13.4852	2.0604	1.04293	up
ko04750	Inflammatory mediator regulation of TRP channels	0.397225	ENSRNOG00000004649	Il1b	K04519	NA	interleukin 1 beta [Source:RGD Symbol;Acc:2891]	20.4545	17.8629	26.638	9.01274	9.02768	13.4852	2.0604	1.04293	up
ko04750	Inflammatory mediator regulation of TRP channels	0.397225	ENSRNOG00000019985	Asic4	K04831	NA	acid sensing ion channel subunit family member 4 [Source:RGD Symbol;Acc:621068]	1.22068	0.713135	0.167016	0.140032	0.161282	0.09395	5.31501	2.41007	up
ko05202	Transcriptional misregulation in cancer	0.408232	ENSRNOG00000004537	Rxrg	K08526	NA	retinoid X receptor gamma [Source:RGD Symbol;Acc:620046]	1.28978	1.42628	2.23642	3.66221	2.84174	4.15561	0.464605	-1.10592	down
ko05202	Transcriptional misregulation in cancer	0.408232	ENSRNOG00000020792	Etv4	K15592	NA	ets variant 4 [Source:RGD Symbol;Acc:1306524]	2.80913	2.96286	3.00357	5.37868	7.13604	6.82892	0.453666	-1.1403	down
ko05202	Transcriptional misregulation in cancer	0.408232	ENSRNOG00000026203	Pax8	K09293	NA	paired box 8 [Source:RGD Symbol;Acc:620434]	0.878829	0.821269	0.820972	0.21796	0.383172	0.130189	3.44728	1.78546	up
ko04670	Leukocyte transendothelial migration	0.41056	ENSRNOG00000010263	Cldn11	K06087	NA	claudin 11 [Source:RGD Symbol;Acc:71081]	2.68847	2.864	2.8561	5.43847	8.61906	7.68507	0.386732	-1.37059	down
ko04670	Leukocyte transendothelial migration	0.41056	ENSRNOG00000016695	Mmp2	K01398	EC:3.4.24.24	matrix metallopeptidase 2 [Source:RGD Symbol;Acc:621316]	30.7938	26.2646	32.2348	67.5082	55.093	74.8328	0.452269	-1.14475	down
ko04340	Hedgehog signaling pathway	0.421858	ENSRNOG00000025120	Gli1	K16797	NA	GLI family zinc finger 1 [Source:RGD Symbol;Acc:621673]	0.698325	0.477126	0.544131	1.56395	1.68971	1.52278	0.360013	-1.47388	down
ko05167	Kaposi sarcoma-associated herpesvirus infection	0.431967	ENSRNOG00000002792	Cxcl2	K05505	NA	C-X-C motif chemokine ligand 2 [Source:RGD Symbol;Acc:70069]	2.49155	1.56141	2.22508	0.21844	0.639161	0.597588	4.31425	2.10911	up
ko05167	Kaposi sarcoma-associated herpesvirus infection	0.431967	ENSRNOG00000016696	Angpt2	K05466	NA	angiopoietin 2 [Source:RGD Symbol;Acc:621861]	3.01199	2.77709	3.05503	7.45684	6.76239	7.96137	0.398732	-1.32651	down
ko05167	Kaposi sarcoma-associated herpesvirus infection	0.431967	ENSRNOG00000049590	RT1-M2	K06751	NA	RT1 class Ib, locus M2 [Source:RGD Symbol;Acc:3493]	1.05738	0.72803	0.844597	0.257868	0	0.133657	6.71734	2.74789	up
ko05322	Systemic lupus erythematosus	0.436795	ENSRNOG00000013736	C9	K04000	NA	complement C9 [Source:RGD Symbol;Acc:620319]	0.095381	0.17503	0.090134	1.08752	0.317408	0.991207	0.150469	-2.73246	down
ko05322	Systemic lupus erythematosus	0.436795	ENSRNOG00000018899	C5	K03994	NA	complement C5 [Source:RGD Symbol;Acc:2237]	1.41673	11.2071	0.792005	0.351361	0.325713	0.313456	13.5441	3.7596	up
ko04650	Natural killer cell mediated cytotoxicity	0.441108	ENSRNOG00000049590	RT1-M2	K06751	NA	RT1 class Ib, locus M2 [Source:RGD Symbol;Acc:3493]	1.05738	0.72803	0.844597	0.257868	0	0.133657	6.71734	2.74789	up
ko04650	Natural killer cell mediated cytotoxicity	0.441108	ENSRNOG00000060246	Klrd1	K06516	NA	killer cell lectin like receptor D1 [Source:RGD Symbol;Acc:2978]	13.655	21.5233	11.2525	7.56228	4.74204	9.73844	2.1064	1.07478	up
ko00380	Tryptophan metabolism	0.443611	ENSRNOG00000019500	Cyp1a1	K07408	EC:1.14.14.1	cytochrome P450, family 1, subfamily a, polypeptide 1 [Source:RGD Symbol;Acc:2458]	1.30617	2.01733	6.01601	22.1476	22.9681	33.3498	0.119027	-3.07064	down
ko02010	ABC transporters	0.450681	ENSRNOG00000055103	Cftr	K05031	EC:5.6.1.6	cystic fibrosis transmembrane conductance regulator [Source:RGD Symbol;Acc:2332]	1.14851	0.941143	0.718715	2.41175	2.46834	1.29678	0.454659	-1.13714	down
ko04913	Ovarian steroidogenesis	0.457662	ENSRNOG00000019500	Cyp1a1	K07408	EC:1.14.14.1	cytochrome P450, family 1, subfamily a, polypeptide 1 [Source:RGD Symbol;Acc:2458]	1.30617	2.01733	6.01601	22.1476	22.9681	33.3498	0.119027	-3.07064	down
ko04071	Sphingolipid signaling pathway	0.45818	ENSRNOG00000014524	S1pr3	K04290	NA	sphingosine-1-phosphate receptor 3 [Source:RGD Symbol;Acc:1583843]	9.98579	9.09143	8.73488	22.3581	16.5395	25.1183	0.434456	-1.20272	down
ko04071	Sphingolipid signaling pathway	0.45818	ENSRNOG00000058202	Ppp2r2c	K04354	NA	protein phosphatase 2, regulatory subunit B, gamma [Source:RGD Symbol;Acc:620920]	4.20679	3.12544	1.49505	1.3584	1.54719	1.00671	2.25629	1.17396	up
ko04380	Osteoclast differentiation	0.462402	ENSRNOG00000004649	Il1b	K04519	NA	interleukin 1 beta [Source:RGD Symbol;Acc:2891]	20.4545	17.8629	26.638	9.01274	9.02768	13.4852	2.0604	1.04293	up
ko04380	Osteoclast differentiation	0.462402	ENSRNOG00000013578	Trem2	K14378	NA	triggering receptor expressed on myeloid cells 2 [Source:RGD Symbol;Acc:1309841]	10.8948	5.01708	5.6079	3.19457	3.44342	4.12088	2.00019	1.00014	up
ko05144	Malaria	0.464555	ENSRNOG00000004649	Il1b	K04519	NA	interleukin 1 beta [Source:RGD Symbol;Acc:2891]	20.4545	17.8629	26.638	9.01274	9.02768	13.4852	2.0604	1.04293	up
ko04068	FoxO signaling pathway	0.466605	ENSRNOG00000017226	Slc2a4	K07191	NA	solute carrier family 2 member 4 [Source:RGD Symbol;Acc:2711]	0.725115	0.747971	0.866538	1.38289	1.35574	3.8632	0.35439	-1.49659	down
ko04068	FoxO signaling pathway	0.466605	ENSRNOG00000028616	Pck1	K01596	EC:4.1.1.32	phosphoenolpyruvate carboxykinase 1 [Source:RGD Symbol;Acc:3267]	0.294123	0.258891	0.731558	1.09133	1.59168	18.8392	0.0596858	-4.06647	down
ko04623	Cytosolic DNA-sensing pathway	0.471361	ENSRNOG00000004649	Il1b	K04519	NA	interleukin 1 beta [Source:RGD Symbol;Acc:2891]	20.4545	17.8629	26.638	9.01274	9.02768	13.4852	2.0604	1.04293	up
ko00330	Arginine and proline metabolism	0.471361	ENSRNOG00000013304	Arg1	K01476	EC:3.5.3.1	arginase 1 [Source:RGD Symbol;Acc:2150]	14.1945	11.7175	9.74681	5.09255	6.15658	5.0671	2.18549	1.12795	up
ko05205	Proteoglycans in cancer	0.471844	ENSRNOG00000014248	Erbb4	K05085	EC:2.7.10.1	erb-b2 receptor tyrosine kinase 4 [Source:RGD Symbol;Acc:620486]	0.602772	0.820792	0.860173	0.247666	0.295959	0.240493	2.91249	1.54225	up
ko05205	Proteoglycans in cancer	0.471844	ENSRNOG00000015618	Wnt5a	K00444	NA	Wnt family member 5A [Source:RGD Symbol;Acc:69250]	3.0348	2.5955	2.2052	6.68335	4.54321	6.14645	0.451016	-1.14875	down
ko05205	Proteoglycans in cancer	0.471844	ENSRNOG00000016695	Mmp2	K01398	EC:3.4.24.24	matrix metallopeptidase 2 [Source:RGD Symbol;Acc:621316]	30.7938	26.2646	32.2348	67.5082	55.093	74.8328	0.452269	-1.14475	down
ko04910	Insulin signaling pathway	0.483225	ENSRNOG00000017226	Slc2a4	K07191	NA	solute carrier family 2 member 4 [Source:RGD Symbol;Acc:2711]	0.725115	0.747971	0.866538	1.38289	1.35574	3.8632	0.35439	-1.49659	down
ko04910	Insulin signaling pathway	0.483225	ENSRNOG00000028616	Pck1	K01596	EC:4.1.1.32	phosphoenolpyruvate carboxykinase 1 [Source:RGD Symbol;Acc:3267]	0.294123	0.258891	0.731558	1.09133	1.59168	18.8392	0.0596858	-4.06647	down
ko05330	Allograft rejection	0.491272	ENSRNOG00000049590	RT1-M2	K06751	NA	RT1 class Ib, locus M2 [Source:RGD Symbol;Acc:3493]	1.05738	0.72803	0.844597	0.257868	0	0.133657	6.71734	2.74789	up
ko00980	Metabolism of xenobiotics by cytochrome P450	0.497742	ENSRNOG00000019500	Cyp1a1	K07408	EC:1.14.14.1	cytochrome P450, family 1, subfamily a, polypeptide 1 [Source:RGD Symbol;Acc:2458]	1.30617	2.01733	6.01601	22.1476	22.9681	33.3498	0.119027	-3.07064	down
ko04270	Vascular smooth muscle contraction	0.503554	ENSRNOG00000021256	Adra1d	NA	NA	adrenoceptor alpha 1D [Source:RGD Symbol;Acc:62064]	0.263536	0.619624	0.355989	1.74131	1.36148	1.17567	0.289625	-1.78774	down
ko04270	Vascular smooth muscle contraction	0.503554	ENSRNOG00000058039	Acta2	K12313	NA	actin alpha 2, smooth muscle [Source:RGD Symbol;Acc:621676]	74.1844	84.8511	106.259	171.41	140.048	239.067	0.481892	-1.05322	down
ko05320	Autoimmune thyroid disease	0.51667	ENSRNOG00000049590	RT1-M2	K06751	NA	RT1 class Ib, locus M2 [Source:RGD Symbol;Acc:3493]	1.05738	0.72803	0.844597	0.257868	0	0.133657	6.71734	2.74789	up
ko05150	Staphylococcus aureus infection	0.51667	ENSRNOG00000018899	C5	K03994	NA	complement C5 [Source:RGD Symbol;Acc:2237]	1.41673	11.2071	0.792005	0.351361	0.325713	0.313456	13.5441	3.7596	up
ko00140	Steroid hormone biosynthesis	0.528894	ENSRNOG00000019500	Cyp1a1	K07408	EC:1.14.14.1	cytochrome P450, family 1, subfamily a, polypeptide 1 [Source:RGD Symbol;Acc:2458]	1.30617	2.01733	6.01601	22.1476	22.9681	33.3498	0.119027	-3.07064	down
ko05321	Inflammatory bowel disease (IBD)	0.528894	ENSRNOG00000004649	Il1b	K04519	NA	interleukin 1 beta [Source:RGD Symbol;Acc:2891]	20.4545	17.8629	26.638	9.01274	9.02768	13.4852	2.0604	1.04293	up
ko05226	Gastric cancer	0.546452	ENSRNOG00000004537	Rxrg	K08526	NA	retinoid X receptor gamma [Source:RGD Symbol;Acc:620046]	1.28978	1.42628	2.23642	3.66221	2.84174	4.15561	0.464605	-1.10592	down
ko05226	Gastric cancer	0.546452	ENSRNOG00000015618	Wnt5a	K00444	NA	Wnt family member 5A [Source:RGD Symbol;Acc:69250]	3.0348	2.5955	2.2052	6.68335	4.54321	6.14645	0.451016	-1.14875	down
ko00480	Glutathione metabolism	0.54666	ENSRNOG00000015763	Nat8f3	K20838	2.3.1.-;EC:2.3.1.80	N-acetyltransferase 8 (GCN5-related) family member 3 [Source:RGD Symbol;Acc:621607]	1.70631	2.86391	2.56139	5.62887	3.47124	6.73715	0.450306	-1.15102	down
ko00010	Glycolysis / Gluconeogenesis	0.54666	ENSRNOG00000028616	Pck1	K01596	EC:4.1.1.32	phosphoenolpyruvate carboxykinase 1 [Source:RGD Symbol;Acc:3267]	0.294123	0.258891	0.731558	1.09133	1.59168	18.8392	0.0596858	-4.06647	down
ko05224	Breast cancer	0.550224	ENSRNOG00000015318	Heyl	K09091	NA	hes-related family bHLH transcription factor with YRPW motif-like [Source:RGD Symbol;Acc:1305022]	2.94339	2.74707	3.0413	7.51638	10.985	9.78336	0.308709	-1.69568	down
ko05224	Breast cancer	0.550224	ENSRNOG00000015618	Wnt5a	K00444	NA	Wnt family member 5A [Source:RGD Symbol;Acc:69250]	3.0348	2.5955	2.2052	6.68335	4.54321	6.14645	0.451016	-1.14875	down
ko05418	Fluid shear stress and atherosclerosis	0.553974	ENSRNOG00000004649	Il1b	K04519	NA	interleukin 1 beta [Source:RGD Symbol;Acc:2891]	20.4545	17.8629	26.638	9.01274	9.02768	13.4852	2.0604	1.04293	up
ko05418	Fluid shear stress and atherosclerosis	0.553974	ENSRNOG00000016695	Mmp2	K01398	EC:3.4.24.24	matrix metallopeptidase 2 [Source:RGD Symbol;Acc:621316]	30.7938	26.2646	32.2348	67.5082	55.093	74.8328	0.452269	-1.14475	down
ko05223	Non-small cell lung cancer	0.563763	ENSRNOG00000004537	Rxrg	K08526	NA	retinoid X receptor gamma [Source:RGD Symbol;Acc:620046]	1.28978	1.42628	2.23642	3.66221	2.84174	4.15561	0.464605	-1.10592	down
ko05160	Hepatitis C	0.565094	ENSRNOG00000010263	Cldn11	K06087	NA	claudin 11 [Source:RGD Symbol;Acc:71081]	2.68847	2.864	2.8561	5.43847	8.61906	7.68507	0.386732	-1.37059	down
ko05160	Hepatitis C	0.565094	ENSRNOG00000058202	Ppp2r2c	K04354	NA	protein phosphatase 2, regulatory subunit B, gamma [Source:RGD Symbol;Acc:620920]	4.20679	3.12544	1.49505	1.3584	1.54719	1.00671	2.25629	1.17396	up
ko04976	Bile secretion	0.585578	ENSRNOG00000055103	Cftr	K05031	EC:5.6.1.6	cystic fibrosis transmembrane conductance regulator [Source:RGD Symbol;Acc:2332]	1.14851	0.941143	0.718715	2.41175	2.46834	1.29678	0.454659	-1.13714	down
ko05204	Chemical carcinogenesis	0.585578	ENSRNOG00000019500	Cyp1a1	K07408	EC:1.14.14.1	cytochrome P450, family 1, subfamily a, polypeptide 1 [Source:RGD Symbol;Acc:2458]	1.30617	2.01733	6.01601	22.1476	22.9681	33.3498	0.119027	-3.07064	down
ko05140	Leishmaniasis	0.585578	ENSRNOG00000004649	Il1b	K04519	NA	interleukin 1 beta [Source:RGD Symbol;Acc:2891]	20.4545	17.8629	26.638	9.01274	9.02768	13.4852	2.0604	1.04293	up
ko04310	Wnt signaling pathway	0.590274	ENSRNOG00000015618	Wnt5a	K00444	NA	Wnt family member 5A [Source:RGD Symbol;Acc:69250]	3.0348	2.5955	2.2052	6.68335	4.54321	6.14645	0.451016	-1.14875	down
ko04310	Wnt signaling pathway	0.590274	ENSRNOG00000053232	Ror2	K05123	EC:2.7.10.1	receptor tyrosine kinase-like orphan receptor 2 [Source:RGD Symbol;Acc:1305275]	0.93753	0.843785	1.20048	2.20838	2.23265	2.21271	0.448138	-1.15799	down
ko00590	Arachidonic acid metabolism	0.590861	ENSRNOG00000013468	Prxl2b	K15717	EC:1.11.1.20	peroxiredoxin like 2B [Source:RGD Symbol;Acc:1308251]	5.58863	8.10379	5.24915	3.62045	2.17249	3.54651	2.02812	1.02015	up
ko04971	Gastric acid secretion	0.596077	ENSRNOG00000055103	Cftr	K05031	EC:5.6.1.6	cystic fibrosis transmembrane conductance regulator [Source:RGD Symbol;Acc:2332]	1.14851	0.941143	0.718715	2.41175	2.46834	1.29678	0.454659	-1.13714	down
ko04621	NOD-like receptor signaling pathway	0.600735	ENSRNOG00000002792	Cxcl2	K05505	NA	C-X-C motif chemokine ligand 2 [Source:RGD Symbol;Acc:70069]	2.49155	1.56141	2.22508	0.21844	0.639161	0.597588	4.31425	2.10911	up
ko04621	NOD-like receptor signaling pathway	0.600735	ENSRNOG00000004649	Il1b	K04519	NA	interleukin 1 beta [Source:RGD Symbol;Acc:2891]	20.4545	17.8629	26.638	9.01274	9.02768	13.4852	2.0604	1.04293	up
ko04721	Synaptic vesicle cycle	0.616293	ENSRNOG00000018644	Slc6a7	K05040	NA	solute carrier family 6 member 7 [Source:RGD Symbol;Acc:620928]	1.38866	1.04448	0.392996	0.497343	0.247701	0.272771	2.77667	1.47335	up
ko00562	Inositol phosphate metabolism	0.616293	ENSRNOG00000019361	Inpp5j	K01106	EC:3.1.3.56	inositol polyphosphate-5-phosphatase J [Source:RGD Symbol;Acc:620541]	0.506732	0.656187	0.933052	1.64089	1.20865	1.66385	0.46439	-1.10659	down
ko05323	Rheumatoid arthritis	0.653771	ENSRNOG00000004649	Il1b	K04519	NA	interleukin 1 beta [Source:RGD Symbol;Acc:2891]	20.4545	17.8629	26.638	9.01274	9.02768	13.4852	2.0604	1.04293	up
ko04012	ErbB signaling pathway	0.666871	ENSRNOG00000014248	Erbb4	K05085	EC:2.7.10.1	erb-b2 receptor tyrosine kinase 4 [Source:RGD Symbol;Acc:620486]	0.602772	0.820792	0.860173	0.247666	0.295959	0.240493	2.91249	1.54225	up
ko04211	Longevity regulating pathway	0.666871	ENSRNOG00000001821	Adipoq	K07296	NA	adiponectin, C1Q and collagen domain containing [Source:RGD Symbol;Acc:628748]	0.269142	0.528074	0.422021	2.31808	1.93395	13.321	0.0693811	-3.84931	down
ko04640	Hematopoietic cell lineage	0.679481	ENSRNOG00000004649	Il1b	K04519	NA	interleukin 1 beta [Source:RGD Symbol;Acc:2891]	20.4545	17.8629	26.638	9.01274	9.02768	13.4852	2.0604	1.04293	up
ko03015	mRNA surveillance pathway	0.683579	ENSRNOG00000058202	Ppp2r2c	K04354	NA	protein phosphatase 2, regulatory subunit B, gamma [Source:RGD Symbol;Acc:620920]	4.20679	3.12544	1.49505	1.3584	1.54719	1.00671	2.25629	1.17396	up
ko04912	GnRH signaling pathway	0.683579	ENSRNOG00000016695	Mmp2	K01398	EC:3.4.24.24	matrix metallopeptidase 2 [Source:RGD Symbol;Acc:621316]	30.7938	26.2646	32.2348	67.5082	55.093	74.8328	0.452269	-1.14475	down
ko04922	Glucagon signaling pathway	0.687625	ENSRNOG00000028616	Pck1	K01596	EC:4.1.1.32	phosphoenolpyruvate carboxykinase 1 [Source:RGD Symbol;Acc:3267]	0.294123	0.258891	0.731558	1.09133	1.59168	18.8392	0.0596858	-4.06647	down
ko05032	Morphine addiction	0.687625	ENSRNOG00000032417	Gabrp	K05189	NA	gamma-aminobutyric acid type A receptor pi subunit [Source:RGD Symbol;Acc:620532]	0.092348	0.19525	0.36241	0.951681	0.704935	1.06596	0.238747	-2.06644	down
ko01522	Endocrine resistance	0.699457	ENSRNOG00000016695	Mmp2	K01398	EC:3.4.24.24	matrix metallopeptidase 2 [Source:RGD Symbol;Acc:621316]	30.7938	26.2646	32.2348	67.5082	55.093	74.8328	0.452269	-1.14475	down
ko04916	Melanogenesis	0.707099	ENSRNOG00000015618	Wnt5a	K00444	NA	Wnt family member 5A [Source:RGD Symbol;Acc:69250]	3.0348	2.5955	2.2052	6.68335	4.54321	6.14645	0.451016	-1.14875	down
ko04070	Phosphatidylinositol signaling system	0.707099	ENSRNOG00000019361	Inpp5j	K01106	EC:3.1.3.56	inositol polyphosphate-5-phosphatase J [Source:RGD Symbol;Acc:620541]	0.506732	0.656187	0.933052	1.64089	1.20865	1.66385	0.46439	-1.10659	down
ko04015	Rap1 signaling pathway	0.731734	ENSRNOG00000005650	Pgf	K16859	NA	placental growth factor [Source:RGD Symbol;Acc:619850]	1.81335	1.74628	1.74662	2.71735	7.21811	5.43133	0.345306	-1.53405	down
ko04015	Rap1 signaling pathway	0.731734	ENSRNOG00000016696	Angpt2	K05466	NA	angiopoietin 2 [Source:RGD Symbol;Acc:621861]	3.01199	2.77709	3.05503	7.45684	6.76239	7.96137	0.398732	-1.32651	down
ko04928	Parathyroid hormone synthesis, secretion and action	0.742516	ENSRNOG00000004537	Rxrg	K08526	NA	retinoid X receptor gamma [Source:RGD Symbol;Acc:620046]	1.28978	1.42628	2.23642	3.66221	2.84174	4.15561	0.464605	-1.10592	down
ko04625	C-type lectin receptor signaling pathway	0.749073	ENSRNOG00000004649	Il1b	K04519	NA	interleukin 1 beta [Source:RGD Symbol;Acc:2891]	20.4545	17.8629	26.638	9.01274	9.02768	13.4852	2.0604	1.04293	up
ko04725	Cholinergic synapse	0.764753	ENSRNOG00000002303	Kcnj12	K05005	NA	potassium voltage-gated channel subfamily J member 12 [Source:RGD Symbol;Acc:621660]	1.13507	0.91256	0.709237	2.64599	1.68286	2.79866	0.386793	-1.37037	down
ko05145	Toxoplasmosis	0.764753	ENSRNOG00000011134	Lama2	K05637	NA	laminin subunit alpha 2 [Source:RGD Symbol;Acc:1308889]	2.28319	2.43893	3.8991	6.65355	4.97214	6.4225	0.477678	-1.06589	down
ko04919	Thyroid hormone signaling pathway	0.767771	ENSRNOG00000004537	Rxrg	K08526	NA	retinoid X receptor gamma [Source:RGD Symbol;Acc:620046]	1.28978	1.42628	2.23642	3.66221	2.84174	4.15561	0.464605	-1.10592	down
ko05168	Herpes simplex virus 1 infection	0.779852	ENSRNOG00000004649	Il1b	K04519	NA	interleukin 1 beta [Source:RGD Symbol;Acc:2891]	20.4545	17.8629	26.638	9.01274	9.02768	13.4852	2.0604	1.04293	up
ko05168	Herpes simplex virus 1 infection	0.779852	ENSRNOG00000018899	C5	K03994	NA	complement C5 [Source:RGD Symbol;Acc:2237]	1.41673	11.2071	0.792005	0.351361	0.325713	0.313456	13.5441	3.7596	up
ko05168	Herpes simplex virus 1 infection	0.779852	ENSRNOG00000049590	RT1-M2	K06751	NA	RT1 class Ib, locus M2 [Source:RGD Symbol;Acc:3493]	1.05738	0.72803	0.844597	0.257868	0	0.133657	6.71734	2.74789	up
ko04142	Lysosome	0.782295	ENSRNOG00000016262	Dnase2b	K01158	EC:3.1.22.1	deoxyribonuclease 2 beta [Source:RGD Symbol;Acc:70901]	1.2716	0.756933	1.54207	0.323684	0.137518	0.513763	3.66228	1.87274	up
ko04014	Ras signaling pathway	0.786699	ENSRNOG00000005650	Pgf	K16859	NA	placental growth factor [Source:RGD Symbol;Acc:619850]	1.81335	1.74628	1.74662	2.71735	7.21811	5.43133	0.345306	-1.53405	down
ko04014	Ras signaling pathway	0.786699	ENSRNOG00000016696	Angpt2	K05466	NA	angiopoietin 2 [Source:RGD Symbol;Acc:621861]	3.01199	2.77709	3.05503	7.45684	6.76239	7.96137	0.398732	-1.32651	down
ko05163	Human cytomegalovirus infection	0.798816	ENSRNOG00000004649	Il1b	K04519	NA	interleukin 1 beta [Source:RGD Symbol;Acc:2891]	20.4545	17.8629	26.638	9.01274	9.02768	13.4852	2.0604	1.04293	up
ko05163	Human cytomegalovirus infection	0.798816	ENSRNOG00000049590	RT1-M2	K06751	NA	RT1 class Ib, locus M2 [Source:RGD Symbol;Acc:3493]	1.05738	0.72803	0.844597	0.257868	0	0.133657	6.71734	2.74789	up
ko04915	Estrogen signaling pathway	0.806209	ENSRNOG00000016695	Mmp2	K01398	EC:3.4.24.24	matrix metallopeptidase 2 [Source:RGD Symbol;Acc:621316]	30.7938	26.2646	32.2348	67.5082	55.093	74.8328	0.452269	-1.14475	down
ko00230	Purine metabolism	0.813588	ENSRNOG00000018656	Ampd1	K01490	EC:3.5.4.6	adenosine monophosphate deaminase 1 [Source:RGD Symbol;Acc:2109]	0.090801	0.074378	0.16613	0.011129	0	0	29.7699	4.89578	up
ko05162	Measles	0.82069	ENSRNOG00000004649	Il1b	K04519	NA	interleukin 1 beta [Source:RGD Symbol;Acc:2891]	20.4545	17.8629	26.638	9.01274	9.02768	13.4852	2.0604	1.04293	up
ko04550	Signaling pathways regulating pluripotency of stem cells	0.825274	ENSRNOG00000015618	Wnt5a	K00444	NA	Wnt family member 5A [Source:RGD Symbol;Acc:69250]	3.0348	2.5955	2.2052	6.68335	4.54321	6.14645	0.451016	-1.14875	down
ko04144	Endocytosis	0.839856	ENSRNOG00000048239	Cxcr1	K04175	NA	C-X-C motif chemokine receptor 1 [Source:RGD Symbol;Acc:2905]	16.0266	13.947	11.851	5.02716	3.39089	4.10572	3.33962	1.73968	up
ko04144	Endocytosis	0.839856	ENSRNOG00000049590	RT1-M2	K06751	NA	RT1 class Ib, locus M2 [Source:RGD Symbol;Acc:3493]	1.05738	0.72803	0.844597	0.257868	0	0.133657	6.71734	2.74789	up
ko04630	Jak-STAT signaling pathway	0.840427	ENSRNOG00000045797	Lep	K05424	NA	leptin [Source:RGD Symbol;Acc:3000]	0.038354	0.031345	0.037116	0.113483	0.270256	1.22499	0.0663972	-3.91273	down
ko05012	Parkinson disease	0.848494	ENSRNOG00000010440	Gnal	NA	NA	G protein subunit alpha L [Source:RGD Symbol;Acc:2715]	1.49662	1.64004	1.25106	3.39378	2.09239	3.64563	0.480487	-1.05743	down
ko04072	Phospholipase D signaling pathway	0.850447	ENSRNOG00000048239	Cxcr1	K04175	NA	C-X-C motif chemokine receptor 1 [Source:RGD Symbol;Acc:2905]	16.0266	13.947	11.851	5.02716	3.39089	4.10572	3.33962	1.73968	up
ko04723	Retrograde endocannabinoid signaling	0.856158	ENSRNOG00000032417	Gabrp	K05189	NA	gamma-aminobutyric acid type A receptor pi subunit [Source:RGD Symbol;Acc:620532]	0.092348	0.19525	0.36241	0.951681	0.704935	1.06596	0.238747	-2.06644	down
ko04921	Oxytocin signaling pathway	0.861653	ENSRNOG00000002303	Kcnj12	K05005	NA	potassium voltage-gated channel subfamily J member 12 [Source:RGD Symbol;Acc:621660]	1.13507	0.91256	0.709237	2.64599	1.68286	2.79866	0.386793	-1.37037	down
ko04150	mTOR signaling pathway	0.861653	ENSRNOG00000015618	Wnt5a	K00444	NA	Wnt family member 5A [Source:RGD Symbol;Acc:69250]	3.0348	2.5955	2.2052	6.68335	4.54321	6.14645	0.451016	-1.14875	down
ko04217	Necroptosis	0.863438	ENSRNOG00000004649	Il1b	K04519	NA	interleukin 1 beta [Source:RGD Symbol;Acc:2891]	20.4545	17.8629	26.638	9.01274	9.02768	13.4852	2.0604	1.04293	up
ko04934	Cushing syndrome	0.863438	ENSRNOG00000015618	Wnt5a	K00444	NA	Wnt family member 5A [Source:RGD Symbol;Acc:69250]	3.0348	2.5955	2.2052	6.68335	4.54321	6.14645	0.451016	-1.14875	down
ko05164	Influenza A	0.86694	ENSRNOG00000004649	Il1b	K04519	NA	interleukin 1 beta [Source:RGD Symbol;Acc:2891]	20.4545	17.8629	26.638	9.01274	9.02768	13.4852	2.0604	1.04293	up
ko05152	Tuberculosis	0.880082	ENSRNOG00000004649	Il1b	K04519	NA	interleukin 1 beta [Source:RGD Symbol;Acc:2891]	20.4545	17.8629	26.638	9.01274	9.02768	13.4852	2.0604	1.04293	up
ko04145	Phagosome	0.884672	ENSRNOG00000049590	RT1-M2	K06751	NA	RT1 class Ib, locus M2 [Source:RGD Symbol;Acc:3493]	1.05738	0.72803	0.844597	0.257868	0	0.133657	6.71734	2.74789	up
ko04218	Cellular senescence	0.890523	ENSRNOG00000049590	RT1-M2	K06751	NA	RT1 class Ib, locus M2 [Source:RGD Symbol;Acc:3493]	1.05738	0.72803	0.844597	0.257868	0	0.133657	6.71734	2.74789	up
ko05225	Hepatocellular carcinoma	0.89194	ENSRNOG00000015618	Wnt5a	K00444	NA	Wnt family member 5A [Source:RGD Symbol;Acc:69250]	3.0348	2.5955	2.2052	6.68335	4.54321	6.14645	0.451016	-1.14875	down
ko05010	Alzheimer disease	0.896081	ENSRNOG00000004649	Il1b	K04519	NA	interleukin 1 beta [Source:RGD Symbol;Acc:2891]	20.4545	17.8629	26.638	9.01274	9.02768	13.4852	2.0604	1.04293	up
ko05016	Huntington disease	0.913422	ENSRNOG00000003580	Ucp1	K08769	NA	uncoupling protein 1 [Source:RGD Symbol;Acc:3931]	0	0	0	0	0	12.6582	2.37001e-05	-15.3647	down
ko04810	Regulation of actin cytoskeleton	0.933341	ENSRNOG00000006723	Itga11	K06587	NA	integrin subunit alpha 11 [Source:RGD Symbol;Acc:1311711]	0.445333	0.566447	0.898136	1.71316	1.51553	1.32386	0.419528	-1.25316	down
ko05169	Epstein-Barr virus infection	0.935064	ENSRNOG00000049590	RT1-M2	K06751	NA	RT1 class Ib, locus M2 [Source:RGD Symbol;Acc:3493]	1.05738	0.72803	0.844597	0.257868	0	0.133657	6.71734	2.74789	up
ko05203	Viral carcinogenesis	0.938379	ENSRNOG00000049590	RT1-M2	K06751	NA	RT1 class Ib, locus M2 [Source:RGD Symbol;Acc:3493]	1.05738	0.72803	0.844597	0.257868	0	0.133657	6.71734	2.74789	up
ko05170	Human immunodeficiency virus 1 infection	0.939182	ENSRNOG00000049590	RT1-M2	K06751	NA	RT1 class Ib, locus M2 [Source:RGD Symbol;Acc:3493]	1.05738	0.72803	0.844597	0.257868	0	0.133657	6.71734	2.74789	up
ko05166	Human T-cell leukemia virus 1 infection	0.949386	ENSRNOG00000049590	RT1-M2	K06751	NA	RT1 class Ib, locus M2 [Source:RGD Symbol;Acc:3493]	1.05738	0.72803	0.844597	0.257868	0	0.133657	6.71734	2.74789	up
ko04740	Olfactory transduction	0.983971	ENSRNOG00000010440	Gnal	NA	NA	G protein subunit alpha L [Source:RGD Symbol;Acc:2715]	1.49662	1.64004	1.25106	3.39378	2.09239	3.64563	0.480487	-1.05743	down
