# Supplementary material for: Analysis of the Potential Relationship between Aging and Pulmonary Fibrosis Based on Transcriptome
Source: Life (Basel). 2022 Nov 23;12(12):1961. doi: 10.3390/life12121961 (PMC9788318; doi:10.3390/life12121961)
Supplement: Supplementary file 1 [file life-12-01961-s001.zip › Table S12-o-PF vs y-PF GO enrichment Gene of Figure S1C.xlsx]

## Sheet: Sheet1
GO_ID	GO_Term	GO_function	GO_class	pvalue	Gene_ID	Gene_name	Description	FPKM.O_PF1	FPKM.O_PF2	FPKM.O_PF3	FPKM.Y_PF1	FPKM.Y_PF2	FPKM.Y_PF3	fc	log2(fc)	regulation
GO:0005615	extracellular space	cellular_component	4	1.33227e-15	ENSRNOG00000000239	Ccl7	C-C motif chemokine ligand 7 [Source:RGD Symbol;Acc:1359152]	14.4232	11.1589	18.1968	0.371988	1.4184	3.33763	8.53719	3.09376	up
GO:0005615	extracellular space	cellular_component	4	1.33227e-15	ENSRNOG00000001414	Serpine1	serpin family E member 1 [Source:RGD Symbol;Acc:3249]	55.409	67.7847	164.683	17.9559	19.5535	21.1919	4.90409	2.29399	up
GO:0005615	extracellular space	cellular_component	4	1.33227e-15	ENSRNOG00000002417	Serpinb10	serpin family B member 10 [Source:RGD Symbol;Acc:628853]	3.3084	3.22071	3.53922	18.5669	15.1888	5.82974	0.254344	-1.97515	down
GO:0005615	extracellular space	cellular_component	4	1.33227e-15	ENSRNOG00000002640	Serpinb5	serpin family B member 5 [Source:RGD Symbol;Acc:69342]	0	0	0	0	0	0.922211	0.000325305	-11.5859	down
GO:0005615	extracellular space	cellular_component	4	1.33227e-15	ENSRNOG00000002723	Sele	selectin E [Source:RGD Symbol;Acc:3654]	2.98187	1.19921	3.6168	0.148222	0.414433	0.461137	7.61667	2.92916	up
GO:0005615	extracellular space	cellular_component	4	1.33227e-15	ENSRNOG00000002754	Areg	amphiregulin [Source:RGD Symbol;Acc:2149]	15.0098	32.3225	41.5271	8.39391	7.3053	7.32716	3.85902	1.94824	up
GO:0005615	extracellular space	cellular_component	4	1.33227e-15	ENSRNOG00000002771	Ereg	epiregulin [Source:RGD Symbol;Acc:620299]	3.53527	6.81166	10.5663	1.17724	1.04308	1.27508	5.98307	2.58089	up
GO:0005615	extracellular space	cellular_component	4	1.33227e-15	ENSRNOG00000002792	Cxcl2	C-X-C motif chemokine ligand 2 [Source:RGD Symbol;Acc:70069]	2.67869	3.89774	3.91406	0.2245	0.858824	0.310974	7.52384	2.91147	up
GO:0005615	extracellular space	cellular_component	4	1.33227e-15	ENSRNOG00000002794	Selp	selectin P [Source:RGD Symbol;Acc:3656]	3.596	2.43421	6.01392	0.725463	1.69202	1.63187	2.97434	1.57257	up
GO:0005615	extracellular space	cellular_component	4	1.33227e-15	ENSRNOG00000002802	Cxcl1	C-X-C motif chemokine ligand 1 [Source:RGD Symbol;Acc:619869]	37.7589	31.9443	77.5216	7.05145	18.0701	6.03944	4.72466	2.24021	up
GO:0005615	extracellular space	cellular_component	4	1.33227e-15	ENSRNOG00000002843	Cxcl6	C-X-C motif chemokine ligand 6 [Source:RGD Symbol;Acc:708540]	5.43574	1.71607	3.19644	0.056385	0.662585	1.21597	5.34811	2.41903	up
GO:0005615	extracellular space	cellular_component	4	1.33227e-15	ENSRNOG00000003538	Adamts4	ADAM metallopeptidase with thrombospondin type 1 motif, 4 [Source:RGD Symbol;Acc:621242]	1.18108	1.04194	1.92092	0.333219	0.394028	0.42186	3.60623	1.85049	up
GO:0005615	extracellular space	cellular_component	4	1.33227e-15	ENSRNOG00000004062	C4bpa	complement component 4 binding protein, alpha [Source:RGD Symbol;Acc:2235]	58.5906	39.8521	68.5658	21.3697	31.3852	29.0953	2.04042	1.02886	up
GO:0005615	extracellular space	cellular_component	4	1.33227e-15	ENSRNOG00000004404	Tac4	tachykinin 4 [Source:RGD Symbol;Acc:628842]	5.30119	5.34132	4.09235	2.20134	1.05591	2.37838	2.61459	1.38659	up
GO:0005615	extracellular space	cellular_component	4	1.33227e-15	ENSRNOG00000004470	Il24	interleukin 24 [Source:RGD Symbol;Acc:621484]	4.71744	2.76935	8.35128	0.401454	0.398275	1.3272	7.44644	2.89655	up
GO:0005615	extracellular space	cellular_component	4	1.33227e-15	ENSRNOG00000004649	Il1b	interleukin 1 beta [Source:RGD Symbol;Acc:2891]	17.0922	15.7097	15.266	6.22867	5.3594	4.98742	2.89994	1.53602	up
GO:0005615	extracellular space	cellular_component	4	1.33227e-15	ENSRNOG00000005871	Il1rn	interleukin 1 receptor antagonist [Source:RGD Symbol;Acc:621159]	38.7998	25.085	37.5114	15.4297	14.5177	9.55624	2.56675	1.35995	up
GO:0005615	extracellular space	cellular_component	4	1.33227e-15	ENSRNOG00000005944	Slurp1	secreted Ly6/Plaur domain containing 1 [Source:RGD Symbol;Acc:1308768]	5.49258	1.6078	5.19726	0.125839	0.800363	0.417785	9.15011	3.19379	up
GO:0005615	extracellular space	cellular_component	4	1.33227e-15	ENSRNOG00000007159	Ccl2	C-C motif chemokine ligand 2 [Source:RGD Symbol;Acc:3645]	37.7066	18.9936	41.8423	1.13671	3.71253	3.7896	11.4069	3.51183	up
GO:0005615	extracellular space	cellular_component	4	1.33227e-15	ENSRNOG00000008176	Nppa	natriuretic peptide A [Source:RGD Symbol;Acc:3193]	0	0	0	0	0	4.77912	6.27731e-05	-13.9595	down
GO:0005615	extracellular space	cellular_component	4	1.33227e-15	ENSRNOG00000008656	Snca	synuclein alpha [Source:RGD Symbol;Acc:3729]	0.033831	0	0.067124	0.192924	0.624332	0.823897	0.0615147	-4.02293	down
GO:0005615	extracellular space	cellular_component	4	1.33227e-15	ENSRNOG00000009646	Nyx	nyctalopin [Source:RGD Symbol;Acc:1561300]	0	0	0.018017	0.208865	0.279967	0.240787	0.0246937	-5.33971	down
GO:0005615	extracellular space	cellular_component	4	1.33227e-15	ENSRNOG00000010208	Timp1	TIMP metallopeptidase inhibitor 1 [Source:RGD Symbol;Acc:621675]	191.725	124.836	377.443	58.9436	79.8218	69.1842	3.33737	1.73871	up
GO:0005615	extracellular space	cellular_component	4	1.33227e-15	ENSRNOG00000010278	Il6	interleukin 6 [Source:RGD Symbol;Acc:2901]	3.16485	2.11915	11.0231	0.105601	0.098662	0.045109	65.3927	6.03106	up
GO:0005615	extracellular space	cellular_component	4	1.33227e-15	ENSRNOG00000010326	Col20a1	collagen type XX alpha 1 chain [Source:RGD Symbol;Acc:1563901]	1.80103	1.4998	1.17096	2.6832	2.16986	4.12626	0.498011	-1.00575	down
GO:0005615	extracellular space	cellular_component	4	1.33227e-15	ENSRNOG00000010478	LOC299282	Ab1-233 [Source:RGD Symbol;Acc:1562479]	21.7553	13.164	40.8971	2.72995	5.56366	9.32606	4.30294	2.10532	up
GO:0005615	extracellular space	cellular_component	4	1.33227e-15	ENSRNOG00000010513	Tfpi2	tissue factor pathway inhibitor 2 [Source:RGD Symbol;Acc:628629]	2.00105	1.77887	4.74033	0.303871	0.748737	1.02747	4.09613	2.03426	up
GO:0005615	extracellular space	cellular_component	4	1.33227e-15	ENSRNOG00000011406	Ccl4	C-C motif chemokine ligand 4 [Source:RGD Symbol;Acc:620441]	11.707	5.81372	6.12502	3.35851	3.36341	2.87314	2.46437	1.30122	up
GO:0005615	extracellular space	cellular_component	4	1.33227e-15	ENSRNOG00000011483	S100a9	S100 calcium binding protein A9 [Source:RGD Symbol;Acc:620267]	111.507	62.986	76.8319	20.221	25.7548	22.6237	3.66366	1.87329	up
GO:0005615	extracellular space	cellular_component	4	1.33227e-15	ENSRNOG00000011557	S100a8	S100 calcium binding protein A8 [Source:RGD Symbol;Acc:620265]	58.764	26.4357	40.8193	6.86219	14.8878	7.83776	4.25916	2.09057	up
GO:0005615	extracellular space	cellular_component	4	1.33227e-15	ENSRNOG00000011800	F3	coagulation factor III, tissue factor [Source:RGD Symbol;Acc:2587]	167.292	169.907	352.923	78.9706	86.6779	136.29	2.28564	1.1926	up
GO:0005615	extracellular space	cellular_component	4	1.33227e-15	ENSRNOG00000013123	Scube2	signal peptide, CUB domain and EGF like domain containing 2 [Source:RGD Symbol;Acc:1563998]	0.455884	0.895264	0.540782	2.64025	1.38693	1.64651	0.333456	-1.58443	down
GO:0005615	extracellular space	cellular_component	4	1.33227e-15	ENSRNOG00000013304	Arg1	arginase 1 [Source:RGD Symbol;Acc:2150]	38.2968	26.0177	49.9768	8.35733	12.4054	14.4375	3.24689	1.69906	up
GO:0005615	extracellular space	cellular_component	4	1.33227e-15	ENSRNOG00000013859	Bpifa1	BPI fold containing family A, member 1 [Source:RGD Symbol;Acc:619818]	1.77021	0.810251	0.062944	0.423531	0.205181	928.063	0.00284637	-8.45666	down
GO:0005615	extracellular space	cellular_component	4	1.33227e-15	ENSRNOG00000013973	Lcn2	lipocalin 2 [Source:RGD Symbol;Acc:69408]	1594.83	895.005	2315.86	399.193	738.611	424.407	3.07622	1.62116	up
GO:0005615	extracellular space	cellular_component	4	1.33227e-15	ENSRNOG00000014143	Col24a1	collagen type XXIV alpha 1 chain [Source:RGD Symbol;Acc:1565539]	0.113145	0.123763	0.067519	0.442035	0.327394	0.338754	0.274708	-1.86403	down
GO:0005615	extracellular space	cellular_component	4	1.33227e-15	ENSRNOG00000014320	Inhba	inhibin subunit beta A [Source:RGD Symbol;Acc:62074]	1.43305	0.871656	0.743097	0.137745	0.416838	0.219709	3.93625	1.97682	up
GO:0005615	extracellular space	cellular_component	4	1.33227e-15	ENSRNOG00000015055	Scg2	secretogranin II [Source:RGD Symbol;Acc:3626]	0.035057	0.056805	0.033008	0.243826	0.147987	2.48424	0.0434172	-4.52559	down
GO:0005615	extracellular space	cellular_component	4	1.33227e-15	ENSRNOG00000016945	Pla2g2a	phospholipase A2 group IIA [Source:RGD Symbol;Acc:620857]	430.776	142.041	305.208	31.8882	19.843	49.1573	8.70292	3.1215	up
GO:0005615	extracellular space	cellular_component	4	1.33227e-15	ENSRNOG00000018257	Hpx	hemopexin [Source:RGD Symbol;Acc:62040]	4.72321	3.68476	5.32204	2.45627	1.66849	2.5683	2.05138	1.03659	up
GO:0005615	extracellular space	cellular_component	4	1.33227e-15	ENSRNOG00000018991	Gsn	gelsolin [Source:RGD Symbol;Acc:1303089]	421.812	450.543	281.254	941.528	460.793	1133.21	0.454977	-1.13614	down
GO:0005615	extracellular space	cellular_component	4	1.33227e-15	ENSRNOG00000021269	Chgb	chromogranin B [Source:RGD Symbol;Acc:2339]	0	0	0	0.14414	0.032678	0.521372	0.000429682	-11.1844	down
GO:0005615	extracellular space	cellular_component	4	1.33227e-15	ENSRNOG00000021619	Cela3b	chymotrypsin like elastase 3B [Source:RGD Symbol;Acc:1307819]	4.59201	1.0716	1.36544	0.166971	0.241357	0.602875	6.95118	2.79726	up
GO:0005615	extracellular space	cellular_component	4	1.33227e-15	ENSRNOG00000023858	Prss39	protease, serine, 39 [Source:RGD Symbol;Acc:1309276]	0.61737	0.670793	0.291965	1.66844	0.90005	1.6692	0.372875	-1.42324	down
GO:0005615	extracellular space	cellular_component	4	1.33227e-15	ENSRNOG00000024390	Osm	oncostatin M [Source:RGD Symbol;Acc:1585012]	2.84715	2.66279	2.36715	1.03466	0.790956	0.679723	3.14413	1.65266	up
GO:0005615	extracellular space	cellular_component	4	1.33227e-15	ENSRNOG00000025074	Fgg	fibrinogen gamma chain [Source:RGD Symbol;Acc:2613]	127.794	78.6948	180.988	61.9913	70.073	37.5544	2.2844	1.19181	up
GO:0005615	extracellular space	cellular_component	4	1.33227e-15	ENSRNOG00000025691	Pla2g7	phospholipase A2 group VII [Source:RGD Symbol;Acc:1310734]	10.9129	7.49608	7.40635	1.91299	2.90558	5.81907	2.42679	1.27905	up
GO:0005615	extracellular space	cellular_component	4	1.33227e-15	ENSRNOG00000029768	Ccl12	chemokine (C-C motif) ligand 12 [Source:RGD Symbol;Acc:1309255]	6.0007	2.47451	2.57848	0.194217	0.89901	0.367082	7.56941	2.92018	up
GO:0005615	extracellular space	cellular_component	4	1.33227e-15	ENSRNOG00000029903	Spock3	SPARC/osteonectin, cwcv and kazal like domains proteoglycan 3 [Source:RGD Symbol;Acc:1305672]	0.278628	0.812314	0.4091	1.92492	1.27859	1.12195	0.346794	-1.52785	down
GO:0005615	extracellular space	cellular_component	4	1.33227e-15	ENSRNOG00000038126	Defb3	beta-defensin 3 [Source:RGD Symbol;Acc:1589572]	2.8242	1.80169	2.32766	0.256909	0.469811	0.738769	4.74487	2.24637	up
GO:0005615	extracellular space	cellular_component	4	1.33227e-15	ENSRNOG00000045829	Thbs1	thrombospondin 1 [Source:RGD Symbol;Acc:1588455]	69.4641	106.372	164.303	44.915	55.3273	28.7153	2.6376	1.39923	up
GO:0005615	extracellular space	cellular_component	4	1.33227e-15	ENSRNOG00000050998	AABR07044397		0	0	0	0	10.0785	0	2.97664e-05	-15.036	down
GO:0005615	extracellular space	cellular_component	4	1.33227e-15	ENSRNOG00000051158	Cfb	complement factor B [Source:RGD Symbol;Acc:2204]	504.105	354.647	440.239	134.428	208.694	220.508	2.30469	1.20457	up
GO:0005615	extracellular space	cellular_component	4	1.33227e-15	ENSRNOG00000051399	Col10a1	collagen type X alpha 1 chain [Source:RGD Symbol;Acc:2371]	0	0.048914	0.043329	0.098932	0.11115	2.12458	0.0395102	-4.66163	down
GO:0005615	extracellular space	cellular_component	4	1.33227e-15	ENSRNOG00000059214	AABR07060963		0.102633	0	0	2.70811	0.106978	1.67639	0.0228506	-5.45162	down
GO:0005615	extracellular space	cellular_component	4	1.33227e-15	ENSRNOG00000059762	AABR07003833		0.066302	0	0	2.07791	0.429676	1.44894	0.0167576	-5.89904	down
GO:0005576	extracellular region	cellular_component	3	2.34124e-12	ENSRNOG00000000239	Ccl7	C-C motif chemokine ligand 7 [Source:RGD Symbol;Acc:1359152]	14.4232	11.1589	18.1968	0.371988	1.4184	3.33763	8.53719	3.09376	up
GO:0005576	extracellular region	cellular_component	3	2.34124e-12	ENSRNOG00000001414	Serpine1	serpin family E member 1 [Source:RGD Symbol;Acc:3249]	55.409	67.7847	164.683	17.9559	19.5535	21.1919	4.90409	2.29399	up
GO:0005576	extracellular region	cellular_component	3	2.34124e-12	ENSRNOG00000002771	Ereg	epiregulin [Source:RGD Symbol;Acc:620299]	3.53527	6.81166	10.5663	1.17724	1.04308	1.27508	5.98307	2.58089	up
GO:0005576	extracellular region	cellular_component	3	2.34124e-12	ENSRNOG00000002792	Cxcl2	C-X-C motif chemokine ligand 2 [Source:RGD Symbol;Acc:70069]	2.67869	3.89774	3.91406	0.2245	0.858824	0.310974	7.52384	2.91147	up
GO:0005576	extracellular region	cellular_component	3	2.34124e-12	ENSRNOG00000002802	Cxcl1	C-X-C motif chemokine ligand 1 [Source:RGD Symbol;Acc:619869]	37.7589	31.9443	77.5216	7.05145	18.0701	6.03944	4.72466	2.24021	up
GO:0005576	extracellular region	cellular_component	3	2.34124e-12	ENSRNOG00000002843	Cxcl6	C-X-C motif chemokine ligand 6 [Source:RGD Symbol;Acc:708540]	5.43574	1.71607	3.19644	0.056385	0.662585	1.21597	5.34811	2.41903	up
GO:0005576	extracellular region	cellular_component	3	2.34124e-12	ENSRNOG00000004404	Tac4	tachykinin 4 [Source:RGD Symbol;Acc:628842]	5.30119	5.34132	4.09235	2.20134	1.05591	2.37838	2.61459	1.38659	up
GO:0005576	extracellular region	cellular_component	3	2.34124e-12	ENSRNOG00000004470	Il24	interleukin 24 [Source:RGD Symbol;Acc:621484]	4.71744	2.76935	8.35128	0.401454	0.398275	1.3272	7.44644	2.89655	up
GO:0005576	extracellular region	cellular_component	3	2.34124e-12	ENSRNOG00000004649	Il1b	interleukin 1 beta [Source:RGD Symbol;Acc:2891]	17.0922	15.7097	15.266	6.22867	5.3594	4.98742	2.89994	1.53602	up
GO:0005576	extracellular region	cellular_component	3	2.34124e-12	ENSRNOG00000005871	Il1rn	interleukin 1 receptor antagonist [Source:RGD Symbol;Acc:621159]	38.7998	25.085	37.5114	15.4297	14.5177	9.55624	2.56675	1.35995	up
GO:0005576	extracellular region	cellular_component	3	2.34124e-12	ENSRNOG00000007002	Lif	LIF, interleukin 6 family cytokine [Source:RGD Symbol;Acc:620865]	2.79472	2.7336	5.46239	0.880568	1.01865	1.04408	3.73414	1.90078	up
GO:0005576	extracellular region	cellular_component	3	2.34124e-12	ENSRNOG00000007159	Ccl2	C-C motif chemokine ligand 2 [Source:RGD Symbol;Acc:3645]	37.7066	18.9936	41.8423	1.13671	3.71253	3.7896	11.4069	3.51183	up
GO:0005576	extracellular region	cellular_component	3	2.34124e-12	ENSRNOG00000008176	Nppa	natriuretic peptide A [Source:RGD Symbol;Acc:3193]	0	0	0	0	0	4.77912	6.27731e-05	-13.9595	down
GO:0005576	extracellular region	cellular_component	3	2.34124e-12	ENSRNOG00000008656	Snca	synuclein alpha [Source:RGD Symbol;Acc:3729]	0.033831	0	0.067124	0.192924	0.624332	0.823897	0.0615147	-4.02293	down
GO:0005576	extracellular region	cellular_component	3	2.34124e-12	ENSRNOG00000010208	Timp1	TIMP metallopeptidase inhibitor 1 [Source:RGD Symbol;Acc:621675]	191.725	124.836	377.443	58.9436	79.8218	69.1842	3.33737	1.73871	up
GO:0005576	extracellular region	cellular_component	3	2.34124e-12	ENSRNOG00000010278	Il6	interleukin 6 [Source:RGD Symbol;Acc:2901]	3.16485	2.11915	11.0231	0.105601	0.098662	0.045109	65.3927	6.03106	up
GO:0005576	extracellular region	cellular_component	3	2.34124e-12	ENSRNOG00000010513	Tfpi2	tissue factor pathway inhibitor 2 [Source:RGD Symbol;Acc:628629]	2.00105	1.77887	4.74033	0.303871	0.748737	1.02747	4.09613	2.03426	up
GO:0005576	extracellular region	cellular_component	3	2.34124e-12	ENSRNOG00000010529	Thbs2	thrombospondin 2 [Source:RGD Symbol;Acc:1310979]	16.9175	9.7328	15.9974	2.57939	6.01878	6.82916	2.76443	1.46698	up
GO:0005576	extracellular region	cellular_component	3	2.34124e-12	ENSRNOG00000010797	Esm1	endothelial cell-specific molecule 1 [Source:RGD Symbol;Acc:71013]	0.637304	0.835068	0.784875	3.70227	1.94073	1.20847	0.329454	-1.60185	down
GO:0005576	extracellular region	cellular_component	3	2.34124e-12	ENSRNOG00000011406	Ccl4	C-C motif chemokine ligand 4 [Source:RGD Symbol;Acc:620441]	11.707	5.81372	6.12502	3.35851	3.36341	2.87314	2.46437	1.30122	up
GO:0005576	extracellular region	cellular_component	3	2.34124e-12	ENSRNOG00000011557	S100a8	S100 calcium binding protein A8 [Source:RGD Symbol;Acc:620265]	58.764	26.4357	40.8193	6.86219	14.8878	7.83776	4.25916	2.09057	up
GO:0005576	extracellular region	cellular_component	3	2.34124e-12	ENSRNOG00000011984	Cxcl14	C-X-C motif chemokine ligand 14 [Source:RGD Symbol;Acc:1307406]	15.4854	17.2001	9.52316	46.4304	41.5978	22.8916	0.380533	-1.39391	down
GO:0005576	extracellular region	cellular_component	3	2.34124e-12	ENSRNOG00000012259	Il22ra2	interleukin 22 receptor subunit alpha 2 [Source:RGD Symbol;Acc:1303169]	0.262024	0.379088	0.267647	0.746875	0.470208	3.56018	0.190226	-2.39421	down
GO:0005576	extracellular region	cellular_component	3	2.34124e-12	ENSRNOG00000013859	Bpifa1	BPI fold containing family A, member 1 [Source:RGD Symbol;Acc:619818]	1.77021	0.810251	0.062944	0.423531	0.205181	928.063	0.00284637	-8.45666	down
GO:0005576	extracellular region	cellular_component	3	2.34124e-12	ENSRNOG00000013973	Lcn2	lipocalin 2 [Source:RGD Symbol;Acc:69408]	1594.83	895.005	2315.86	399.193	738.611	424.407	3.07622	1.62116	up
GO:0005576	extracellular region	cellular_component	3	2.34124e-12	ENSRNOG00000014320	Inhba	inhibin subunit beta A [Source:RGD Symbol;Acc:62074]	1.43305	0.871656	0.743097	0.137745	0.416838	0.219709	3.93625	1.97682	up
GO:0005576	extracellular region	cellular_component	3	2.34124e-12	ENSRNOG00000014350	Ccn1	cellular communication network factor 1 [Source:RGD Symbol;Acc:620763]	80.4142	168.259	87.5866	30.0122	51.2155	26.7196	3.11503	1.63925	up
GO:0005576	extracellular region	cellular_component	3	2.34124e-12	ENSRNOG00000015716	Gp2	glycoprotein 2 [Source:RGD Symbol;Acc:621695]	0.252451	0.0635918	0.0285183	0.0165844	0.308392	47.0873	0.00726734	-7.10436	down
GO:0005576	extracellular region	cellular_component	3	2.34124e-12	ENSRNOG00000016945	Pla2g2a	phospholipase A2 group IIA [Source:RGD Symbol;Acc:620857]	430.776	142.041	305.208	31.8882	19.843	49.1573	8.70292	3.1215	up
GO:0005576	extracellular region	cellular_component	3	2.34124e-12	ENSRNOG00000018257	Hpx	hemopexin [Source:RGD Symbol;Acc:62040]	4.72321	3.68476	5.32204	2.45627	1.66849	2.5683	2.05138	1.03659	up
GO:0005576	extracellular region	cellular_component	3	2.34124e-12	ENSRNOG00000018991	Gsn	gelsolin [Source:RGD Symbol;Acc:1303089]	421.812	450.543	281.254	941.528	460.793	1133.21	0.454977	-1.13614	down
GO:0005576	extracellular region	cellular_component	3	2.34124e-12	ENSRNOG00000021269	Chgb	chromogranin B [Source:RGD Symbol;Acc:2339]	0	0	0	0.14414	0.032678	0.521372	0.000429682	-11.1844	down
GO:0005576	extracellular region	cellular_component	3	2.34124e-12	ENSRNOG00000023858	Prss39	protease, serine, 39 [Source:RGD Symbol;Acc:1309276]	0.61737	0.670793	0.291965	1.66844	0.90005	1.6692	0.372875	-1.42324	down
GO:0005576	extracellular region	cellular_component	3	2.34124e-12	ENSRNOG00000024390	Osm	oncostatin M [Source:RGD Symbol;Acc:1585012]	2.84715	2.66279	2.36715	1.03466	0.790956	0.679723	3.14413	1.65266	up
GO:0005576	extracellular region	cellular_component	3	2.34124e-12	ENSRNOG00000025074	Fgg	fibrinogen gamma chain [Source:RGD Symbol;Acc:2613]	127.794	78.6948	180.988	61.9913	70.073	37.5544	2.2844	1.19181	up
GO:0005576	extracellular region	cellular_component	3	2.34124e-12	ENSRNOG00000026060	Arsi	arylsulfatase family, member I [Source:RGD Symbol;Acc:1310242]	14.5631	8.11538	13.0706	5.18789	5.25854	3.9107	2.48999	1.31614	up
GO:0005576	extracellular region	cellular_component	3	2.34124e-12	ENSRNOG00000029768	Ccl12	chemokine (C-C motif) ligand 12 [Source:RGD Symbol;Acc:1309255]	6.0007	2.47451	2.57848	0.194217	0.89901	0.367082	7.56941	2.92018	up
GO:0005576	extracellular region	cellular_component	3	2.34124e-12	ENSRNOG00000033162	Chia	chitinase, acidic [Source:RGD Symbol;Acc:1303058]	315.521	274.274	276.963	62.7794	110.055	141.399	2.75832	1.46379	up
GO:0005576	extracellular region	cellular_component	3	2.34124e-12	ENSRNOG00000038126	Defb3	beta-defensin 3 [Source:RGD Symbol;Acc:1589572]	2.8242	1.80169	2.32766	0.256909	0.469811	0.738769	4.74487	2.24637	up
GO:0005576	extracellular region	cellular_component	3	2.34124e-12	ENSRNOG00000045829	Thbs1	thrombospondin 1 [Source:RGD Symbol;Acc:1588455]	69.4641	106.372	164.303	44.915	55.3273	28.7153	2.6376	1.39923	up
GO:0005576	extracellular region	cellular_component	3	2.34124e-12	ENSRNOG00000046848	PCOLCE2	procollagen C-endopeptidase enhancer 2 [Source:RGD Symbol;Acc:1595195]	5.81048	6.81291	4.70162	14.6357	10.3164	26.2067	0.338652	-1.56212	down
GO:0005576	extracellular region	cellular_component	3	2.34124e-12	ENSRNOG00000051158	Cfb	complement factor B [Source:RGD Symbol;Acc:2204]	504.105	354.647	440.239	134.428	208.694	220.508	2.30469	1.20457	up
GO:0005576	extracellular region	cellular_component	3	2.34124e-12	ENSRNOG00000051399	Col10a1	collagen type X alpha 1 chain [Source:RGD Symbol;Acc:2371]	0	0.048914	0.043329	0.098932	0.11115	2.12458	0.0395102	-4.66163	down
GO:0005576	extracellular region	cellular_component	3	2.34124e-12	ENSRNOG00000058645	Tnc	tenascin C [Source:RGD Symbol;Acc:621057]	32.8819	24.6221	38.6851	10.8562	17.6057	12.6766	2.33817	1.22538	up
GO:0005125	cytokine activity	molecular_function	7	7.65336e-11	ENSRNOG00000000239	Ccl7	C-C motif chemokine ligand 7 [Source:RGD Symbol;Acc:1359152]	14.4232	11.1589	18.1968	0.371988	1.4184	3.33763	8.53719	3.09376	up
GO:0005125	cytokine activity	molecular_function	7	7.65336e-11	ENSRNOG00000002754	Areg	amphiregulin [Source:RGD Symbol;Acc:2149]	15.0098	32.3225	41.5271	8.39391	7.3053	7.32716	3.85902	1.94824	up
GO:0005125	cytokine activity	molecular_function	7	7.65336e-11	ENSRNOG00000002792	Cxcl2	C-X-C motif chemokine ligand 2 [Source:RGD Symbol;Acc:70069]	2.67869	3.89774	3.91406	0.2245	0.858824	0.310974	7.52384	2.91147	up
GO:0005125	cytokine activity	molecular_function	7	7.65336e-11	ENSRNOG00000002802	Cxcl1	C-X-C motif chemokine ligand 1 [Source:RGD Symbol;Acc:619869]	37.7589	31.9443	77.5216	7.05145	18.0701	6.03944	4.72466	2.24021	up
GO:0005125	cytokine activity	molecular_function	7	7.65336e-11	ENSRNOG00000002843	Cxcl6	C-X-C motif chemokine ligand 6 [Source:RGD Symbol;Acc:708540]	5.43574	1.71607	3.19644	0.056385	0.662585	1.21597	5.34811	2.41903	up
GO:0005125	cytokine activity	molecular_function	7	7.65336e-11	ENSRNOG00000004470	Il24	interleukin 24 [Source:RGD Symbol;Acc:621484]	4.71744	2.76935	8.35128	0.401454	0.398275	1.3272	7.44644	2.89655	up
GO:0005125	cytokine activity	molecular_function	7	7.65336e-11	ENSRNOG00000004649	Il1b	interleukin 1 beta [Source:RGD Symbol;Acc:2891]	17.0922	15.7097	15.266	6.22867	5.3594	4.98742	2.89994	1.53602	up
GO:0005125	cytokine activity	molecular_function	7	7.65336e-11	ENSRNOG00000005871	Il1rn	interleukin 1 receptor antagonist [Source:RGD Symbol;Acc:621159]	38.7998	25.085	37.5114	15.4297	14.5177	9.55624	2.56675	1.35995	up
GO:0005125	cytokine activity	molecular_function	7	7.65336e-11	ENSRNOG00000007002	Lif	LIF, interleukin 6 family cytokine [Source:RGD Symbol;Acc:620865]	2.79472	2.7336	5.46239	0.880568	1.01865	1.04408	3.73414	1.90078	up
GO:0005125	cytokine activity	molecular_function	7	7.65336e-11	ENSRNOG00000007159	Ccl2	C-C motif chemokine ligand 2 [Source:RGD Symbol;Acc:3645]	37.7066	18.9936	41.8423	1.13671	3.71253	3.7896	11.4069	3.51183	up
GO:0005125	cytokine activity	molecular_function	7	7.65336e-11	ENSRNOG00000010208	Timp1	TIMP metallopeptidase inhibitor 1 [Source:RGD Symbol;Acc:621675]	191.725	124.836	377.443	58.9436	79.8218	69.1842	3.33737	1.73871	up
GO:0005125	cytokine activity	molecular_function	7	7.65336e-11	ENSRNOG00000010278	Il6	interleukin 6 [Source:RGD Symbol;Acc:2901]	3.16485	2.11915	11.0231	0.105601	0.098662	0.045109	65.3927	6.03106	up
GO:0005125	cytokine activity	molecular_function	7	7.65336e-11	ENSRNOG00000011406	Ccl4	C-C motif chemokine ligand 4 [Source:RGD Symbol;Acc:620441]	11.707	5.81372	6.12502	3.35851	3.36341	2.87314	2.46437	1.30122	up
GO:0005125	cytokine activity	molecular_function	7	7.65336e-11	ENSRNOG00000014320	Inhba	inhibin subunit beta A [Source:RGD Symbol;Acc:62074]	1.43305	0.871656	0.743097	0.137745	0.416838	0.219709	3.93625	1.97682	up
GO:0005125	cytokine activity	molecular_function	7	7.65336e-11	ENSRNOG00000015055	Scg2	secretogranin II [Source:RGD Symbol;Acc:3626]	0.035057	0.056805	0.033008	0.243826	0.147987	2.48424	0.0434172	-4.52559	down
GO:0005125	cytokine activity	molecular_function	7	7.65336e-11	ENSRNOG00000024390	Osm	oncostatin M [Source:RGD Symbol;Acc:1585012]	2.84715	2.66279	2.36715	1.03466	0.790956	0.679723	3.14413	1.65266	up
GO:0005125	cytokine activity	molecular_function	7	7.65336e-11	ENSRNOG00000029768	Ccl12	chemokine (C-C motif) ligand 12 [Source:RGD Symbol;Acc:1309255]	6.0007	2.47451	2.57848	0.194217	0.89901	0.367082	7.56941	2.92018	up
GO:0008009	chemokine activity	molecular_function	8	5.73572e-08	ENSRNOG00000000239	Ccl7	C-C motif chemokine ligand 7 [Source:RGD Symbol;Acc:1359152]	14.4232	11.1589	18.1968	0.371988	1.4184	3.33763	8.53719	3.09376	up
GO:0008009	chemokine activity	molecular_function	8	5.73572e-08	ENSRNOG00000002792	Cxcl2	C-X-C motif chemokine ligand 2 [Source:RGD Symbol;Acc:70069]	2.67869	3.89774	3.91406	0.2245	0.858824	0.310974	7.52384	2.91147	up
GO:0008009	chemokine activity	molecular_function	8	5.73572e-08	ENSRNOG00000002802	Cxcl1	C-X-C motif chemokine ligand 1 [Source:RGD Symbol;Acc:619869]	37.7589	31.9443	77.5216	7.05145	18.0701	6.03944	4.72466	2.24021	up
GO:0008009	chemokine activity	molecular_function	8	5.73572e-08	ENSRNOG00000002843	Cxcl6	C-X-C motif chemokine ligand 6 [Source:RGD Symbol;Acc:708540]	5.43574	1.71607	3.19644	0.056385	0.662585	1.21597	5.34811	2.41903	up
GO:0008009	chemokine activity	molecular_function	8	5.73572e-08	ENSRNOG00000007159	Ccl2	C-C motif chemokine ligand 2 [Source:RGD Symbol;Acc:3645]	37.7066	18.9936	41.8423	1.13671	3.71253	3.7896	11.4069	3.51183	up
GO:0008009	chemokine activity	molecular_function	8	5.73572e-08	ENSRNOG00000011406	Ccl4	C-C motif chemokine ligand 4 [Source:RGD Symbol;Acc:620441]	11.707	5.81372	6.12502	3.35851	3.36341	2.87314	2.46437	1.30122	up
GO:0008009	chemokine activity	molecular_function	8	5.73572e-08	ENSRNOG00000011984	Cxcl14	C-X-C motif chemokine ligand 14 [Source:RGD Symbol;Acc:1307406]	15.4854	17.2001	9.52316	46.4304	41.5978	22.8916	0.380533	-1.39391	down
GO:0008009	chemokine activity	molecular_function	8	5.73572e-08	ENSRNOG00000029768	Ccl12	chemokine (C-C motif) ligand 12 [Source:RGD Symbol;Acc:1309255]	6.0007	2.47451	2.57848	0.194217	0.89901	0.367082	7.56941	2.92018	up
GO:0071356	cellular response to tumor necrosis factor	biological_process	8	1.60001e-07	ENSRNOG00000000239	Ccl7	C-C motif chemokine ligand 7 [Source:RGD Symbol;Acc:1359152]	14.4232	11.1589	18.1968	0.371988	1.4184	3.33763	8.53719	3.09376	up
GO:0071356	cellular response to tumor necrosis factor	biological_process	8	1.60001e-07	ENSRNOG00000001926	Cldn1	claudin 1 [Source:RGD Symbol;Acc:68422]	0.854451	0.532531	0.439747	1.41622	1.43284	1.98282	0.378057	-1.40332	down
GO:0071356	cellular response to tumor necrosis factor	biological_process	8	1.60001e-07	ENSRNOG00000004473	Ppargc1a	PPARG coactivator 1 alpha [Source:RGD Symbol;Acc:620925]	0.699099	0.733841	0.380414	1.53806	1.6784	1.50382	0.384163	-1.38021	down
GO:0071356	cellular response to tumor necrosis factor	biological_process	8	1.60001e-07	ENSRNOG00000004854	Has2	hyaluronan synthase 2 [Source:RGD Symbol;Acc:2781]	0.632455	0.404069	0.485014	0.116629	0.11933	0.20685	3.4361	1.78077	up
GO:0071356	cellular response to tumor necrosis factor	biological_process	8	1.60001e-07	ENSRNOG00000007159	Ccl2	C-C motif chemokine ligand 2 [Source:RGD Symbol;Acc:3645]	37.7066	18.9936	41.8423	1.13671	3.71253	3.7896	11.4069	3.51183	up
GO:0071356	cellular response to tumor necrosis factor	biological_process	8	1.60001e-07	ENSRNOG00000010278	Il6	interleukin 6 [Source:RGD Symbol;Acc:2901]	3.16485	2.11915	11.0231	0.105601	0.098662	0.045109	65.3927	6.03106	up
GO:0071356	cellular response to tumor necrosis factor	biological_process	8	1.60001e-07	ENSRNOG00000013973	Lcn2	lipocalin 2 [Source:RGD Symbol;Acc:69408]	1594.83	895.005	2315.86	399.193	738.611	424.407	3.07622	1.62116	up
GO:0071356	cellular response to tumor necrosis factor	biological_process	8	1.60001e-07	ENSRNOG00000018598	Ankrd1	ankyrin repeat domain 1 [Source:RGD Symbol;Acc:61989]	107.023	107.496	209.618	52.1948	92.124	57.3024	2.10363	1.07288	up
GO:0071356	cellular response to tumor necrosis factor	biological_process	8	1.60001e-07	ENSRNOG00000018839	Ntrk2	neurotrophic receptor tyrosine kinase 2 [Source:RGD Symbol;Acc:3213]	2.74908	5.01041	5.1754	1.89725	0.712652	1.98932	2.81241	1.49181	up
GO:0071356	cellular response to tumor necrosis factor	biological_process	8	1.60001e-07	ENSRNOG00000029768	Ccl12	chemokine (C-C motif) ligand 12 [Source:RGD Symbol;Acc:1309255]	6.0007	2.47451	2.57848	0.194217	0.89901	0.367082	7.56941	2.92018	up
GO:0071356	cellular response to tumor necrosis factor	biological_process	8	1.60001e-07	ENSRNOG00000045829	Thbs1	thrombospondin 1 [Source:RGD Symbol;Acc:1588455]	69.4641	106.372	164.303	44.915	55.3273	28.7153	2.6376	1.39923	up
GO:0071356	cellular response to tumor necrosis factor	biological_process	8	1.60001e-07	ENSRNOG00000056457	Gpd1	glycerol-3-phosphate dehydrogenase 1 [Source:RGD Symbol;Acc:621381]	11.7425	9.46065	12.8299	18.8796	16.7739	36.6629	0.470613	-1.08739	down
GO:0006955	immune response	biological_process	4	4.46299e-07	ENSRNOG00000000239	Ccl7	C-C motif chemokine ligand 7 [Source:RGD Symbol;Acc:1359152]	14.4232	11.1589	18.1968	0.371988	1.4184	3.33763	8.53719	3.09376	up
GO:0006955	immune response	biological_process	4	4.46299e-07	ENSRNOG00000002792	Cxcl2	C-X-C motif chemokine ligand 2 [Source:RGD Symbol;Acc:70069]	2.67869	3.89774	3.91406	0.2245	0.858824	0.310974	7.52384	2.91147	up
GO:0006955	immune response	biological_process	4	4.46299e-07	ENSRNOG00000002802	Cxcl1	C-X-C motif chemokine ligand 1 [Source:RGD Symbol;Acc:619869]	37.7589	31.9443	77.5216	7.05145	18.0701	6.03944	4.72466	2.24021	up
GO:0006955	immune response	biological_process	4	4.46299e-07	ENSRNOG00000002843	Cxcl6	C-X-C motif chemokine ligand 6 [Source:RGD Symbol;Acc:708540]	5.43574	1.71607	3.19644	0.056385	0.662585	1.21597	5.34811	2.41903	up
GO:0006955	immune response	biological_process	4	4.46299e-07	ENSRNOG00000004649	Il1b	interleukin 1 beta [Source:RGD Symbol;Acc:2891]	17.0922	15.7097	15.266	6.22867	5.3594	4.98742	2.89994	1.53602	up
GO:0006955	immune response	biological_process	4	4.46299e-07	ENSRNOG00000005871	Il1rn	interleukin 1 receptor antagonist [Source:RGD Symbol;Acc:621159]	38.7998	25.085	37.5114	15.4297	14.5177	9.55624	2.56675	1.35995	up
GO:0006955	immune response	biological_process	4	4.46299e-07	ENSRNOG00000007002	Lif	LIF, interleukin 6 family cytokine [Source:RGD Symbol;Acc:620865]	2.79472	2.7336	5.46239	0.880568	1.01865	1.04408	3.73414	1.90078	up
GO:0006955	immune response	biological_process	4	4.46299e-07	ENSRNOG00000007159	Ccl2	C-C motif chemokine ligand 2 [Source:RGD Symbol;Acc:3645]	37.7066	18.9936	41.8423	1.13671	3.71253	3.7896	11.4069	3.51183	up
GO:0006955	immune response	biological_process	4	4.46299e-07	ENSRNOG00000010278	Il6	interleukin 6 [Source:RGD Symbol;Acc:2901]	3.16485	2.11915	11.0231	0.105601	0.098662	0.045109	65.3927	6.03106	up
GO:0006955	immune response	biological_process	4	4.46299e-07	ENSRNOG00000011406	Ccl4	C-C motif chemokine ligand 4 [Source:RGD Symbol;Acc:620441]	11.707	5.81372	6.12502	3.35851	3.36341	2.87314	2.46437	1.30122	up
GO:0006955	immune response	biological_process	4	4.46299e-07	ENSRNOG00000011668	Nfil3	nuclear factor, interleukin 3 regulated [Source:RGD Symbol;Acc:620972]	8.36549	8.08717	16.2594	4.32403	3.116	5.24537	2.57872	1.36665	up
GO:0006955	immune response	biological_process	4	4.46299e-07	ENSRNOG00000011984	Cxcl14	C-X-C motif chemokine ligand 14 [Source:RGD Symbol;Acc:1307406]	15.4854	17.2001	9.52316	46.4304	41.5978	22.8916	0.380533	-1.39391	down
GO:0006955	immune response	biological_process	4	4.46299e-07	ENSRNOG00000019622	Ackr3	atypical chemokine receptor 3 [Source:RGD Symbol;Acc:620601]	76.304	96.1834	133.552	44.5313	43.6139	45.7138	2.28628	1.193	up
GO:0006955	immune response	biological_process	4	4.46299e-07	ENSRNOG00000024390	Osm	oncostatin M [Source:RGD Symbol;Acc:1585012]	2.84715	2.66279	2.36715	1.03466	0.790956	0.679723	3.14413	1.65266	up
GO:0006955	immune response	biological_process	4	4.46299e-07	ENSRNOG00000028250	Lax1	lymphocyte transmembrane adaptor 1 [Source:RGD Symbol;Acc:1563522]	2.42339	2.90581	1.50243	6.54694	3.8691	8.02388	0.370481	-1.43253	down
GO:0006955	immune response	biological_process	4	4.46299e-07	ENSRNOG00000029768	Ccl12	chemokine (C-C motif) ligand 12 [Source:RGD Symbol;Acc:1309255]	6.0007	2.47451	2.57848	0.194217	0.89901	0.367082	7.56941	2.92018	up
GO:0006955	immune response	biological_process	4	4.46299e-07	ENSRNOG00000045829	Thbs1	thrombospondin 1 [Source:RGD Symbol;Acc:1588455]	69.4641	106.372	164.303	44.915	55.3273	28.7153	2.6376	1.39923	up
GO:0006955	immune response	biological_process	4	4.46299e-07	ENSRNOG00000050998	AABR07044397		0	0	0	0	10.0785	0	2.97664e-05	-15.036	down
GO:0006955	immune response	biological_process	4	4.46299e-07	ENSRNOG00000059214	AABR07060963		0.102633	0	0	2.70811	0.106978	1.67639	0.0228506	-5.45162	down
GO:0006955	immune response	biological_process	4	4.46299e-07	ENSRNOG00000059762	AABR07003833		0.066302	0	0	2.07791	0.429676	1.44894	0.0167576	-5.89904	down
GO:0006935	chemotaxis	biological_process	5	5.8759e-07	ENSRNOG00000000239	Ccl7	C-C motif chemokine ligand 7 [Source:RGD Symbol;Acc:1359152]	14.4232	11.1589	18.1968	0.371988	1.4184	3.33763	8.53719	3.09376	up
GO:0006935	chemotaxis	biological_process	5	5.8759e-07	ENSRNOG00000002792	Cxcl2	C-X-C motif chemokine ligand 2 [Source:RGD Symbol;Acc:70069]	2.67869	3.89774	3.91406	0.2245	0.858824	0.310974	7.52384	2.91147	up
GO:0006935	chemotaxis	biological_process	5	5.8759e-07	ENSRNOG00000002802	Cxcl1	C-X-C motif chemokine ligand 1 [Source:RGD Symbol;Acc:619869]	37.7589	31.9443	77.5216	7.05145	18.0701	6.03944	4.72466	2.24021	up
GO:0006935	chemotaxis	biological_process	5	5.8759e-07	ENSRNOG00000002843	Cxcl6	C-X-C motif chemokine ligand 6 [Source:RGD Symbol;Acc:708540]	5.43574	1.71607	3.19644	0.056385	0.662585	1.21597	5.34811	2.41903	up
GO:0006935	chemotaxis	biological_process	5	5.8759e-07	ENSRNOG00000007159	Ccl2	C-C motif chemokine ligand 2 [Source:RGD Symbol;Acc:3645]	37.7066	18.9936	41.8423	1.13671	3.71253	3.7896	11.4069	3.51183	up
GO:0006935	chemotaxis	biological_process	5	5.8759e-07	ENSRNOG00000011406	Ccl4	C-C motif chemokine ligand 4 [Source:RGD Symbol;Acc:620441]	11.707	5.81372	6.12502	3.35851	3.36341	2.87314	2.46437	1.30122	up
GO:0006935	chemotaxis	biological_process	5	5.8759e-07	ENSRNOG00000011557	S100a8	S100 calcium binding protein A8 [Source:RGD Symbol;Acc:620265]	58.764	26.4357	40.8193	6.86219	14.8878	7.83776	4.25916	2.09057	up
GO:0006935	chemotaxis	biological_process	5	5.8759e-07	ENSRNOG00000019622	Ackr3	atypical chemokine receptor 3 [Source:RGD Symbol;Acc:620601]	76.304	96.1834	133.552	44.5313	43.6139	45.7138	2.28628	1.193	up
GO:0006935	chemotaxis	biological_process	5	5.8759e-07	ENSRNOG00000029768	Ccl12	chemokine (C-C motif) ligand 12 [Source:RGD Symbol;Acc:1309255]	6.0007	2.47451	2.57848	0.194217	0.89901	0.367082	7.56941	2.92018	up
GO:0006935	chemotaxis	biological_process	5	5.8759e-07	ENSRNOG00000038126	Defb3	beta-defensin 3 [Source:RGD Symbol;Acc:1589572]	2.8242	1.80169	2.32766	0.256909	0.469811	0.738769	4.74487	2.24637	up
GO:0071398	cellular response to fatty acid	biological_process	7	1.10044e-06	ENSRNOG00000004473	Ppargc1a	PPARG coactivator 1 alpha [Source:RGD Symbol;Acc:620925]	0.699099	0.733841	0.380414	1.53806	1.6784	1.50382	0.384163	-1.38021	down
GO:0071398	cellular response to fatty acid	biological_process	7	1.10044e-06	ENSRNOG00000007159	Ccl2	C-C motif chemokine ligand 2 [Source:RGD Symbol;Acc:3645]	37.7066	18.9936	41.8423	1.13671	3.71253	3.7896	11.4069	3.51183	up
GO:0071398	cellular response to fatty acid	biological_process	7	1.10044e-06	ENSRNOG00000009565	Pdk4	pyruvate dehydrogenase kinase 4 [Source:RGD Symbol;Acc:69061]	2.62301	4.34469	2.6731	12.1191	6.47343	18.0392	0.263182	-1.92587	down
GO:0071398	cellular response to fatty acid	biological_process	7	1.10044e-06	ENSRNOG00000018606	Olr59	olfactory receptor 59 [Source:RGD Symbol;Acc:628858]	1.22605	1.00656	1.51125	0.528759	0.534917	0.739663	2.07607	1.05386	up
GO:0071398	cellular response to fatty acid	biological_process	7	1.10044e-06	ENSRNOG00000037467	Ffar3	free fatty acid receptor 3 [Source:RGD Symbol;Acc:1311035]	0.218127	0.129805	0.377051	0	0	0	2416.61	11.2388	up
GO:0071398	cellular response to fatty acid	biological_process	7	1.10044e-06	ENSRNOG00000046239	LOC100909612	mitochondrial brown fat uncoupling protein 1-like [Source:RGD Symbol;Acc:6502621]	0	0	0	0.110577	0	2.76227	0.000104426	-13.2252	down
GO:0006954	inflammatory response	biological_process	6	1.311e-06	ENSRNOG00000000239	Ccl7	C-C motif chemokine ligand 7 [Source:RGD Symbol;Acc:1359152]	14.4232	11.1589	18.1968	0.371988	1.4184	3.33763	8.53719	3.09376	up
GO:0006954	inflammatory response	biological_process	6	1.311e-06	ENSRNOG00000002723	Sele	selectin E [Source:RGD Symbol;Acc:3654]	2.98187	1.19921	3.6168	0.148222	0.414433	0.461137	7.61667	2.92916	up
GO:0006954	inflammatory response	biological_process	6	1.311e-06	ENSRNOG00000002792	Cxcl2	C-X-C motif chemokine ligand 2 [Source:RGD Symbol;Acc:70069]	2.67869	3.89774	3.91406	0.2245	0.858824	0.310974	7.52384	2.91147	up
GO:0006954	inflammatory response	biological_process	6	1.311e-06	ENSRNOG00000002794	Selp	selectin P [Source:RGD Symbol;Acc:3656]	3.596	2.43421	6.01392	0.725463	1.69202	1.63187	2.97434	1.57257	up
GO:0006954	inflammatory response	biological_process	6	1.311e-06	ENSRNOG00000004404	Tac4	tachykinin 4 [Source:RGD Symbol;Acc:628842]	5.30119	5.34132	4.09235	2.20134	1.05591	2.37838	2.61459	1.38659	up
GO:0006954	inflammatory response	biological_process	6	1.311e-06	ENSRNOG00000004649	Il1b	interleukin 1 beta [Source:RGD Symbol;Acc:2891]	17.0922	15.7097	15.266	6.22867	5.3594	4.98742	2.89994	1.53602	up
GO:0006954	inflammatory response	biological_process	6	1.311e-06	ENSRNOG00000005871	Il1rn	interleukin 1 receptor antagonist [Source:RGD Symbol;Acc:621159]	38.7998	25.085	37.5114	15.4297	14.5177	9.55624	2.56675	1.35995	up
GO:0006954	inflammatory response	biological_process	6	1.311e-06	ENSRNOG00000006639	Scn9a	sodium voltage-gated channel alpha subunit 9 [Source:RGD Symbol;Acc:69368]	0	0	0	0.00415055	0.00708024	0.083853	0.00315511	-8.30809	down
GO:0006954	inflammatory response	biological_process	6	1.311e-06	ENSRNOG00000007159	Ccl2	C-C motif chemokine ligand 2 [Source:RGD Symbol;Acc:3645]	37.7066	18.9936	41.8423	1.13671	3.71253	3.7896	11.4069	3.51183	up
GO:0006954	inflammatory response	biological_process	6	1.311e-06	ENSRNOG00000011557	S100a8	S100 calcium binding protein A8 [Source:RGD Symbol;Acc:620265]	58.764	26.4357	40.8193	6.86219	14.8878	7.83776	4.25916	2.09057	up
GO:0006954	inflammatory response	biological_process	6	1.311e-06	ENSRNOG00000018839	Ntrk2	neurotrophic receptor tyrosine kinase 2 [Source:RGD Symbol;Acc:3213]	2.74908	5.01041	5.1754	1.89725	0.712652	1.98932	2.81241	1.49181	up
GO:0006954	inflammatory response	biological_process	6	1.311e-06	ENSRNOG00000022067	Tlr5	toll-like receptor 5 [Source:RGD Symbol;Acc:631351]	1.22779	1.25646	1.08737	3.79088	2.48157	3.94515	0.349555	-1.51641	down
GO:0006954	inflammatory response	biological_process	6	1.311e-06	ENSRNOG00000029768	Ccl12	chemokine (C-C motif) ligand 12 [Source:RGD Symbol;Acc:1309255]	6.0007	2.47451	2.57848	0.194217	0.89901	0.367082	7.56941	2.92018	up
GO:0006954	inflammatory response	biological_process	6	1.311e-06	ENSRNOG00000037467	Ffar3	free fatty acid receptor 3 [Source:RGD Symbol;Acc:1311035]	0.218127	0.129805	0.377051	0	0	0	2416.61	11.2388	up
GO:0006954	inflammatory response	biological_process	6	1.311e-06	ENSRNOG00000045829	Thbs1	thrombospondin 1 [Source:RGD Symbol;Acc:1588455]	69.4641	106.372	164.303	44.915	55.3273	28.7153	2.6376	1.39923	up
GO:0071347	cellular response to interleukin-1	biological_process	8	1.31771e-06	ENSRNOG00000000239	Ccl7	C-C motif chemokine ligand 7 [Source:RGD Symbol;Acc:1359152]	14.4232	11.1589	18.1968	0.371988	1.4184	3.33763	8.53719	3.09376	up
GO:0071347	cellular response to interleukin-1	biological_process	8	1.31771e-06	ENSRNOG00000002792	Cxcl2	C-X-C motif chemokine ligand 2 [Source:RGD Symbol;Acc:70069]	2.67869	3.89774	3.91406	0.2245	0.858824	0.310974	7.52384	2.91147	up
GO:0071347	cellular response to interleukin-1	biological_process	8	1.31771e-06	ENSRNOG00000004854	Has2	hyaluronan synthase 2 [Source:RGD Symbol;Acc:2781]	0.632455	0.404069	0.485014	0.116629	0.11933	0.20685	3.4361	1.78077	up
GO:0071347	cellular response to interleukin-1	biological_process	8	1.31771e-06	ENSRNOG00000007159	Ccl2	C-C motif chemokine ligand 2 [Source:RGD Symbol;Acc:3645]	37.7066	18.9936	41.8423	1.13671	3.71253	3.7896	11.4069	3.51183	up
GO:0071347	cellular response to interleukin-1	biological_process	8	1.31771e-06	ENSRNOG00000010278	Il6	interleukin 6 [Source:RGD Symbol;Acc:2901]	3.16485	2.11915	11.0231	0.105601	0.098662	0.045109	65.3927	6.03106	up
GO:0071347	cellular response to interleukin-1	biological_process	8	1.31771e-06	ENSRNOG00000013973	Lcn2	lipocalin 2 [Source:RGD Symbol;Acc:69408]	1594.83	895.005	2315.86	399.193	738.611	424.407	3.07622	1.62116	up
GO:0071347	cellular response to interleukin-1	biological_process	8	1.31771e-06	ENSRNOG00000018598	Ankrd1	ankyrin repeat domain 1 [Source:RGD Symbol;Acc:61989]	107.023	107.496	209.618	52.1948	92.124	57.3024	2.10363	1.07288	up
GO:0071347	cellular response to interleukin-1	biological_process	8	1.31771e-06	ENSRNOG00000025074	Fgg	fibrinogen gamma chain [Source:RGD Symbol;Acc:2613]	127.794	78.6948	180.988	61.9913	70.073	37.5544	2.2844	1.19181	up
GO:0071347	cellular response to interleukin-1	biological_process	8	1.31771e-06	ENSRNOG00000029768	Ccl12	chemokine (C-C motif) ligand 12 [Source:RGD Symbol;Acc:1309255]	6.0007	2.47451	2.57848	0.194217	0.89901	0.367082	7.56941	2.92018	up
GO:0030593	neutrophil chemotaxis	biological_process	7	1.43512e-06	ENSRNOG00000000239	Ccl7	C-C motif chemokine ligand 7 [Source:RGD Symbol;Acc:1359152]	14.4232	11.1589	18.1968	0.371988	1.4184	3.33763	8.53719	3.09376	up
GO:0030593	neutrophil chemotaxis	biological_process	7	1.43512e-06	ENSRNOG00000002792	Cxcl2	C-X-C motif chemokine ligand 2 [Source:RGD Symbol;Acc:70069]	2.67869	3.89774	3.91406	0.2245	0.858824	0.310974	7.52384	2.91147	up
GO:0030593	neutrophil chemotaxis	biological_process	7	1.43512e-06	ENSRNOG00000002843	Cxcl6	C-X-C motif chemokine ligand 6 [Source:RGD Symbol;Acc:708540]	5.43574	1.71607	3.19644	0.056385	0.662585	1.21597	5.34811	2.41903	up
GO:0030593	neutrophil chemotaxis	biological_process	7	1.43512e-06	ENSRNOG00000004649	Il1b	interleukin 1 beta [Source:RGD Symbol;Acc:2891]	17.0922	15.7097	15.266	6.22867	5.3594	4.98742	2.89994	1.53602	up
GO:0030593	neutrophil chemotaxis	biological_process	7	1.43512e-06	ENSRNOG00000007159	Ccl2	C-C motif chemokine ligand 2 [Source:RGD Symbol;Acc:3645]	37.7066	18.9936	41.8423	1.13671	3.71253	3.7896	11.4069	3.51183	up
GO:0030593	neutrophil chemotaxis	biological_process	7	1.43512e-06	ENSRNOG00000011483	S100a9	S100 calcium binding protein A9 [Source:RGD Symbol;Acc:620267]	111.507	62.986	76.8319	20.221	25.7548	22.6237	3.66366	1.87329	up
GO:0030593	neutrophil chemotaxis	biological_process	7	1.43512e-06	ENSRNOG00000011557	S100a8	S100 calcium binding protein A8 [Source:RGD Symbol;Acc:620265]	58.764	26.4357	40.8193	6.86219	14.8878	7.83776	4.25916	2.09057	up
GO:0030593	neutrophil chemotaxis	biological_process	7	1.43512e-06	ENSRNOG00000029768	Ccl12	chemokine (C-C motif) ligand 12 [Source:RGD Symbol;Acc:1309255]	6.0007	2.47451	2.57848	0.194217	0.89901	0.367082	7.56941	2.92018	up
GO:0008217	regulation of blood pressure	biological_process	5	3.5658e-06	ENSRNOG00000002302	Corin	corin, serine peptidase [Source:RGD Symbol;Acc:727887]	0.106521	0.316943	0.05572	0.485884	0.896918	1.82259	0.149493	-2.74185	down
GO:0008217	regulation of blood pressure	biological_process	5	3.5658e-06	ENSRNOG00000004404	Tac4	tachykinin 4 [Source:RGD Symbol;Acc:628842]	5.30119	5.34132	4.09235	2.20134	1.05591	2.37838	2.61459	1.38659	up
GO:0008217	regulation of blood pressure	biological_process	5	3.5658e-06	ENSRNOG00000007290	Atp1a2	ATPase Na+/K+ transporting subunit alpha 2 [Source:RGD Symbol;Acc:2168]	1.11361	2.2107	0.439613	6.02731	3.2216	13.5037	0.165429	-2.59572	down
GO:0008217	regulation of blood pressure	biological_process	5	3.5658e-06	ENSRNOG00000008176	Nppa	natriuretic peptide A [Source:RGD Symbol;Acc:3193]	0	0	0	0	0	4.77912	6.27731e-05	-13.9595	down
GO:0008217	regulation of blood pressure	biological_process	5	3.5658e-06	ENSRNOG00000011039	Gch1	GTP cyclohydrolase 1 [Source:RGD Symbol;Acc:61992]	24.2456	21.4661	37.719	10.8419	15.8192	13.7037	2.06692	1.04748	up
GO:0008217	regulation of blood pressure	biological_process	5	3.5658e-06	ENSRNOG00000014117	Hmox1	heme oxygenase 1 [Source:RGD Symbol;Acc:2806]	551.077	151.281	396.168	31.9406	70.2869	56.3487	6.92743	2.79232	up
GO:0008217	regulation of blood pressure	biological_process	5	3.5658e-06	ENSRNOG00000019048	Sod2	superoxide dismutase 2 [Source:RGD Symbol;Acc:3732]	144.337	78.5731	208.619	40.7461	61.5904	73.5054	2.45407	1.29518	up
GO:0007623	circadian rhythm	biological_process	4	3.91967e-06	ENSRNOG00000011668	Nfil3	nuclear factor, interleukin 3 regulated [Source:RGD Symbol;Acc:620972]	8.36549	8.08717	16.2594	4.32403	3.116	5.24537	2.57872	1.36665	up
GO:0007623	circadian rhythm	biological_process	4	3.91967e-06	ENSRNOG00000014215	Klf9	Kruppel-like factor 9 [Source:RGD Symbol;Acc:70934]	11.9358	17.8583	12.2313	37.3234	29.1884	19.113	0.490808	-1.02677	down
GO:0007623	circadian rhythm	biological_process	4	3.91967e-06	ENSRNOG00000014448	Arntl	aryl hydrocarbon receptor nuclear translocator-like [Source:RGD Symbol;Acc:62003]	7.69285	5.52374	7.07682	4.26659	2.17754	3.16265	2.1124	1.07889	up
GO:0007623	circadian rhythm	biological_process	4	3.91967e-06	ENSRNOG00000018413	Per3	period circadian regulator 3 [Source:RGD Symbol;Acc:621581]	4.81173	7.50402	4.2525	12.0606	17.1225	18.8685	0.344801	-1.53616	down
GO:0007623	circadian rhythm	biological_process	4	3.91967e-06	ENSRNOG00000018827	LOC103694905	5-hydroxytryptamine receptor 7 [Source:RGD Symbol;Acc:9265298]	0.601136	0.302224	0.67299	0.0940072	0.184716	0.168906	3.52156	1.81621	up
GO:0007623	circadian rhythm	biological_process	4	3.91967e-06	ENSRNOG00000018839	Ntrk2	neurotrophic receptor tyrosine kinase 2 [Source:RGD Symbol;Acc:3213]	2.74908	5.01041	5.1754	1.89725	0.712652	1.98932	2.81241	1.49181	up
GO:0007623	circadian rhythm	biological_process	4	3.91967e-06	ENSRNOG00000020254	Per2	period circadian regulator 2 [Source:RGD Symbol;Acc:61945]	5.08553	8.59563	7.97541	10.986	14.3571	23.4713	0.443651	-1.1725	down
GO:0007623	circadian rhythm	biological_process	4	3.91967e-06	ENSRNOG00000021027	Dbp	D-box binding PAR bZIP transcription factor [Source:RGD Symbol;Acc:2491]	8.27444	13.9751	6.57459	23.8057	42.1863	32.955	0.291308	-1.77938	down
GO:0007623	circadian rhythm	biological_process	4	3.91967e-06	ENSRNOG00000059479	Adcy1	adenylate cyclase 1 [Source:RGD Symbol;Acc:1309318]	0.206208	0.356452	0.124273	1.21653	0.813194	0.51294	0.270163	-1.8881	down
GO:0062023	collagen-containing extracellular matrix	cellular_component	5	1.67854e-05	ENSRNOG00000001414	Serpine1	serpin family E member 1 [Source:RGD Symbol;Acc:3249]	55.409	67.7847	164.683	17.9559	19.5535	21.1919	4.90409	2.29399	up
GO:0062023	collagen-containing extracellular matrix	cellular_component	5	1.67854e-05	ENSRNOG00000010326	Col20a1	collagen type XX alpha 1 chain [Source:RGD Symbol;Acc:1563901]	1.80103	1.4998	1.17096	2.6832	2.16986	4.12626	0.498011	-1.00575	down
GO:0062023	collagen-containing extracellular matrix	cellular_component	5	1.67854e-05	ENSRNOG00000010529	Thbs2	thrombospondin 2 [Source:RGD Symbol;Acc:1310979]	16.9175	9.7328	15.9974	2.57939	6.01878	6.82916	2.76443	1.46698	up
GO:0062023	collagen-containing extracellular matrix	cellular_component	5	1.67854e-05	ENSRNOG00000011800	F3	coagulation factor III, tissue factor [Source:RGD Symbol;Acc:2587]	167.292	169.907	352.923	78.9706	86.6779	136.29	2.28564	1.1926	up
GO:0062023	collagen-containing extracellular matrix	cellular_component	5	1.67854e-05	ENSRNOG00000039560	LOC103690116	osteomodulin [Source:RGD Symbol;Acc:9400356]	0.673123	0.945252	0.395326	1.92043	2.47155	2.86156	0.277616	-1.84884	down
GO:0062023	collagen-containing extracellular matrix	cellular_component	5	1.67854e-05	ENSRNOG00000045829	Thbs1	thrombospondin 1 [Source:RGD Symbol;Acc:1588455]	69.4641	106.372	164.303	44.915	55.3273	28.7153	2.6376	1.39923	up
GO:0062023	collagen-containing extracellular matrix	cellular_component	5	1.67854e-05	ENSRNOG00000046658	Omd	osteomodulin [Source:RGD Symbol;Acc:621818]	0.608261	0.820549	0.417281	1.82399	1.75037	2.8251	0.288476	-1.79348	down
GO:0062023	collagen-containing extracellular matrix	cellular_component	5	1.67854e-05	ENSRNOG00000051399	Col10a1	collagen type X alpha 1 chain [Source:RGD Symbol;Acc:2371]	0	0.048914	0.043329	0.098932	0.11115	2.12458	0.0395102	-4.66163	down
GO:0062023	collagen-containing extracellular matrix	cellular_component	5	1.67854e-05	ENSRNOG00000058645	Tnc	tenascin C [Source:RGD Symbol;Acc:621057]	32.8819	24.6221	38.6851	10.8562	17.6057	12.6766	2.33817	1.22538	up
GO:0010628	positive regulation of gene expression	biological_process	8	1.79547e-05	ENSRNOG00000003745	Atf3	activating transcription factor 3 [Source:RGD Symbol;Acc:2165]	10.4013	37.4337	46.2986	3.78197	4.08518	7.17428	6.25829	2.64577	up
GO:0010628	positive regulation of gene expression	biological_process	8	1.79547e-05	ENSRNOG00000004473	Ppargc1a	PPARG coactivator 1 alpha [Source:RGD Symbol;Acc:620925]	0.699099	0.733841	0.380414	1.53806	1.6784	1.50382	0.384163	-1.38021	down
GO:0010628	positive regulation of gene expression	biological_process	8	1.79547e-05	ENSRNOG00000004649	Il1b	interleukin 1 beta [Source:RGD Symbol;Acc:2891]	17.0922	15.7097	15.266	6.22867	5.3594	4.98742	2.89994	1.53602	up
GO:0010628	positive regulation of gene expression	biological_process	8	1.79547e-05	ENSRNOG00000006569	Itgb8	integrin subunit beta 8 [Source:RGD Symbol;Acc:1311374]	2.69064	1.81036	3.42008	0.970632	0.984076	0.573387	3.13322	1.64765	up
GO:0010628	positive regulation of gene expression	biological_process	8	1.79547e-05	ENSRNOG00000007002	Lif	LIF, interleukin 6 family cytokine [Source:RGD Symbol;Acc:620865]	2.79472	2.7336	5.46239	0.880568	1.01865	1.04408	3.73414	1.90078	up
GO:0010628	positive regulation of gene expression	biological_process	8	1.79547e-05	ENSRNOG00000007159	Ccl2	C-C motif chemokine ligand 2 [Source:RGD Symbol;Acc:3645]	37.7066	18.9936	41.8423	1.13671	3.71253	3.7896	11.4069	3.51183	up
GO:0010628	positive regulation of gene expression	biological_process	8	1.79547e-05	ENSRNOG00000010278	Il6	interleukin 6 [Source:RGD Symbol;Acc:2901]	3.16485	2.11915	11.0231	0.105601	0.098662	0.045109	65.3927	6.03106	up
GO:0010628	positive regulation of gene expression	biological_process	8	1.79547e-05	ENSRNOG00000011668	Nfil3	nuclear factor, interleukin 3 regulated [Source:RGD Symbol;Acc:620972]	8.36549	8.08717	16.2594	4.32403	3.116	5.24537	2.57872	1.36665	up
GO:0010628	positive regulation of gene expression	biological_process	8	1.79547e-05	ENSRNOG00000013074	Wt1	WT1 transcription factor [Source:RGD Symbol;Acc:3974]	6.51322	3.77358	7.11635	1.80892	3.61924	2.35499	2.236	1.16092	up
GO:0010628	positive regulation of gene expression	biological_process	8	1.79547e-05	ENSRNOG00000013973	Lcn2	lipocalin 2 [Source:RGD Symbol;Acc:69408]	1594.83	895.005	2315.86	399.193	738.611	424.407	3.07622	1.62116	up
GO:0010628	positive regulation of gene expression	biological_process	8	1.79547e-05	ENSRNOG00000014320	Inhba	inhibin subunit beta A [Source:RGD Symbol;Acc:62074]	1.43305	0.871656	0.743097	0.137745	0.416838	0.219709	3.93625	1.97682	up
GO:0010628	positive regulation of gene expression	biological_process	8	1.79547e-05	ENSRNOG00000014481	Adtrp	androgen-dependent TFPI-regulating protein [Source:RGD Symbol;Acc:1305679]	4.99979	4.28189	7.60994	2.40931	3.24639	2.70577	2.02017	1.01448	up
GO:0010628	positive regulation of gene expression	biological_process	8	1.79547e-05	ENSRNOG00000017786	Acta1	actin, alpha 1, skeletal muscle [Source:RGD Symbol;Acc:2025]	9.08505	7.68911	17.567	2.06127	3.95623	4.72239	3.19753	1.67696	up
GO:0010628	positive regulation of gene expression	biological_process	8	1.79547e-05	ENSRNOG00000018839	Ntrk2	neurotrophic receptor tyrosine kinase 2 [Source:RGD Symbol;Acc:3213]	2.74908	5.01041	5.1754	1.89725	0.712652	1.98932	2.81241	1.49181	up
GO:0010628	positive regulation of gene expression	biological_process	8	1.79547e-05	ENSRNOG00000018991	Gsn	gelsolin [Source:RGD Symbol;Acc:1303089]	421.812	450.543	281.254	941.528	460.793	1133.21	0.454977	-1.13614	down
GO:0010628	positive regulation of gene expression	biological_process	8	1.79547e-05	ENSRNOG00000019422	Egr1	early growth response 1 [Source:RGD Symbol;Acc:2544]	28.8778	81.6766	49.115	5.6807	12.1778	9.44428	5.8481	2.54797	up
GO:0010628	positive regulation of gene expression	biological_process	8	1.79547e-05	ENSRNOG00000058645	Tnc	tenascin C [Source:RGD Symbol;Acc:621057]	32.8819	24.6221	38.6851	10.8562	17.6057	12.6766	2.33817	1.22538	up
GO:0071222	cellular response to lipopolysaccharide	biological_process	8	1.85858e-05	ENSRNOG00000001414	Serpine1	serpin family E member 1 [Source:RGD Symbol;Acc:3249]	55.409	67.7847	164.683	17.9559	19.5535	21.1919	4.90409	2.29399	up
GO:0071222	cellular response to lipopolysaccharide	biological_process	8	1.85858e-05	ENSRNOG00000002792	Cxcl2	C-X-C motif chemokine ligand 2 [Source:RGD Symbol;Acc:70069]	2.67869	3.89774	3.91406	0.2245	0.858824	0.310974	7.52384	2.91147	up
GO:0071222	cellular response to lipopolysaccharide	biological_process	8	1.85858e-05	ENSRNOG00000002843	Cxcl6	C-X-C motif chemokine ligand 6 [Source:RGD Symbol;Acc:708540]	5.43574	1.71607	3.19644	0.056385	0.662585	1.21597	5.34811	2.41903	up
GO:0071222	cellular response to lipopolysaccharide	biological_process	8	1.85858e-05	ENSRNOG00000004470	Il24	interleukin 24 [Source:RGD Symbol;Acc:621484]	4.71744	2.76935	8.35128	0.401454	0.398275	1.3272	7.44644	2.89655	up
GO:0071222	cellular response to lipopolysaccharide	biological_process	8	1.85858e-05	ENSRNOG00000004473	Ppargc1a	PPARG coactivator 1 alpha [Source:RGD Symbol;Acc:620925]	0.699099	0.733841	0.380414	1.53806	1.6784	1.50382	0.384163	-1.38021	down
GO:0071222	cellular response to lipopolysaccharide	biological_process	8	1.85858e-05	ENSRNOG00000007159	Ccl2	C-C motif chemokine ligand 2 [Source:RGD Symbol;Acc:3645]	37.7066	18.9936	41.8423	1.13671	3.71253	3.7896	11.4069	3.51183	up
GO:0071222	cellular response to lipopolysaccharide	biological_process	8	1.85858e-05	ENSRNOG00000010278	Il6	interleukin 6 [Source:RGD Symbol;Acc:2901]	3.16485	2.11915	11.0231	0.105601	0.098662	0.045109	65.3927	6.03106	up
GO:0071222	cellular response to lipopolysaccharide	biological_process	8	1.85858e-05	ENSRNOG00000013304	Arg1	arginase 1 [Source:RGD Symbol;Acc:2150]	38.2968	26.0177	49.9768	8.35733	12.4054	14.4375	3.24689	1.69906	up
GO:0071222	cellular response to lipopolysaccharide	biological_process	8	1.85858e-05	ENSRNOG00000013973	Lcn2	lipocalin 2 [Source:RGD Symbol;Acc:69408]	1594.83	895.005	2315.86	399.193	738.611	424.407	3.07622	1.62116	up
GO:0071222	cellular response to lipopolysaccharide	biological_process	8	1.85858e-05	ENSRNOG00000018598	Ankrd1	ankyrin repeat domain 1 [Source:RGD Symbol;Acc:61989]	107.023	107.496	209.618	52.1948	92.124	57.3024	2.10363	1.07288	up
GO:0071222	cellular response to lipopolysaccharide	biological_process	8	1.85858e-05	ENSRNOG00000022067	Tlr5	toll-like receptor 5 [Source:RGD Symbol;Acc:631351]	1.22779	1.25646	1.08737	3.79088	2.48157	3.94515	0.349555	-1.51641	down
GO:0031090	organelle membrane	cellular_component	4	2.08656e-05	ENSRNOG00000003510	Fmo2	flavin containing dimethylaniline monoxygenase 2 [Source:RGD Symbol;Acc:628600]	36.2628	40.8993	13.9322	160.378	105.178	155.493	0.216351	-2.20855	down
GO:0031090	organelle membrane	cellular_component	4	2.08656e-05	ENSRNOG00000003620	Fmo3	flavin containing dimethylaniline monoxygenase 3 [Source:RGD Symbol;Acc:619761]	5.58543	7.00354	2.57024	22.1896	18.4762	39.5247	0.18904	-2.40324	down
GO:0031090	organelle membrane	cellular_component	4	2.08656e-05	ENSRNOG00000012458	Cyp2e1	cytochrome P450, family 2, subfamily e, polypeptide 1 [Source:RGD Symbol;Acc:2475]	1.59029	2.0422	0.503894	5.70974	4.74285	4.83838	0.270512	-1.88624	down
GO:0031090	organelle membrane	cellular_component	4	2.08656e-05	ENSRNOG00000019500	Cyp1a1	cytochrome P450, family 1, subfamily a, polypeptide 1 [Source:RGD Symbol;Acc:2458]	3.79747	8.76837	3.6107	28.2685	25.6761	8.90865	0.25737	-1.95808	down
GO:0031090	organelle membrane	cellular_component	4	2.08656e-05	ENSRNOG00000032261	Cyp2d4	cytochrome P450, family 2, subfamily d, polypeptide 4 [Source:RGD Symbol;Acc:620640]	3.90219	4.53709	2.88962	9.25606	7.48095	6.29301	0.491919	-1.02351	down
GO:0031090	organelle membrane	cellular_component	4	2.08656e-05	ENSRNOG00000049851	Fmo6	flavin containing monooxygenase 6 [Source:RGD Symbol;Acc:1559491]	0.023136	0.014864	0.04261	0.734681	0.198205	13.4635	0.00559931	-7.48054	down
GO:0031090	organelle membrane	cellular_component	4	2.08656e-05	ENSRNOG00000058568	Dhrs9	dehydrogenase/reductase 9 [Source:RGD Symbol;Acc:620655]	9.49096	6.67188	18.1665	1.17878	2.82958	3.45117	4.60207	2.20228	up
GO:0017144	drug metabolic process	biological_process	5	3.07855e-05	ENSRNOG00000003510	Fmo2	flavin containing dimethylaniline monoxygenase 2 [Source:RGD Symbol;Acc:628600]	36.2628	40.8993	13.9322	160.378	105.178	155.493	0.216351	-2.20855	down
GO:0017144	drug metabolic process	biological_process	5	3.07855e-05	ENSRNOG00000012458	Cyp2e1	cytochrome P450, family 2, subfamily e, polypeptide 1 [Source:RGD Symbol;Acc:2475]	1.59029	2.0422	0.503894	5.70974	4.74285	4.83838	0.270512	-1.88624	down
GO:0017144	drug metabolic process	biological_process	5	3.07855e-05	ENSRNOG00000019500	Cyp1a1	cytochrome P450, family 1, subfamily a, polypeptide 1 [Source:RGD Symbol;Acc:2458]	3.79747	8.76837	3.6107	28.2685	25.6761	8.90865	0.25737	-1.95808	down
GO:0017144	drug metabolic process	biological_process	5	3.07855e-05	ENSRNOG00000032261	Cyp2d4	cytochrome P450, family 2, subfamily d, polypeptide 4 [Source:RGD Symbol;Acc:620640]	3.90219	4.53709	2.88962	9.25606	7.48095	6.29301	0.491919	-1.02351	down
GO:0048245	eosinophil chemotaxis	biological_process	7	3.07855e-05	ENSRNOG00000000239	Ccl7	C-C motif chemokine ligand 7 [Source:RGD Symbol;Acc:1359152]	14.4232	11.1589	18.1968	0.371988	1.4184	3.33763	8.53719	3.09376	up
GO:0048245	eosinophil chemotaxis	biological_process	7	3.07855e-05	ENSRNOG00000007159	Ccl2	C-C motif chemokine ligand 2 [Source:RGD Symbol;Acc:3645]	37.7066	18.9936	41.8423	1.13671	3.71253	3.7896	11.4069	3.51183	up
GO:0048245	eosinophil chemotaxis	biological_process	7	3.07855e-05	ENSRNOG00000015055	Scg2	secretogranin II [Source:RGD Symbol;Acc:3626]	0.035057	0.056805	0.033008	0.243826	0.147987	2.48424	0.0434172	-4.52559	down
GO:0048245	eosinophil chemotaxis	biological_process	7	3.07855e-05	ENSRNOG00000029768	Ccl12	chemokine (C-C motif) ligand 12 [Source:RGD Symbol;Acc:1309255]	6.0007	2.47451	2.57848	0.194217	0.89901	0.367082	7.56941	2.92018	up
GO:0004022	alcohol dehydrogenase (NAD) activity	molecular_function	7	3.18281e-05	ENSRNOG00000007069	Adhfe1	alcohol dehydrogenase, iron containing, 1 [Source:RGD Symbol;Acc:1308863]	1.33406	1.55771	0.55276	4.76899	1.84642	4.43534	0.311701	-1.68176	down
GO:0004022	alcohol dehydrogenase (NAD) activity	molecular_function	7	3.18281e-05	ENSRNOG00000012436	Adh6	alcohol dehydrogenase 1 (class I) [Source:RGD Symbol;Acc:2044]	3.44215	4.16162	1.57908	6.77746	7.28181	9.62364	0.387742	-1.36683	down
GO:0004022	alcohol dehydrogenase (NAD) activity	molecular_function	7	3.18281e-05	ENSRNOG00000058568	Dhrs9	dehydrogenase/reductase 9 [Source:RGD Symbol;Acc:620655]	9.49096	6.67188	18.1665	1.17878	2.82958	3.45117	4.60207	2.20228	up
GO:0030213	hyaluronan biosynthetic process	biological_process	9	3.18281e-05	ENSRNOG00000004649	Il1b	interleukin 1 beta [Source:RGD Symbol;Acc:2891]	17.0922	15.7097	15.266	6.22867	5.3594	4.98742	2.89994	1.53602	up
GO:0030213	hyaluronan biosynthetic process	biological_process	9	3.18281e-05	ENSRNOG00000004854	Has2	hyaluronan synthase 2 [Source:RGD Symbol;Acc:2781]	0.632455	0.404069	0.485014	0.116629	0.11933	0.20685	3.4361	1.78077	up
GO:0030213	hyaluronan biosynthetic process	biological_process	9	3.18281e-05	ENSRNOG00000010994	Has1	hyaluronan synthase 1 [Source:RGD Symbol;Acc:708528]	2.04263	1.86301	4.06113	0.791237	1.41846	0.81575	2.63326	1.39685	up
GO:0042060	wound healing	biological_process	6	3.86171e-05	ENSRNOG00000002792	Cxcl2	C-X-C motif chemokine ligand 2 [Source:RGD Symbol;Acc:70069]	2.67869	3.89774	3.91406	0.2245	0.858824	0.310974	7.52384	2.91147	up
GO:0042060	wound healing	biological_process	6	3.86171e-05	ENSRNOG00000004470	Il24	interleukin 24 [Source:RGD Symbol;Acc:621484]	4.71744	2.76935	8.35128	0.401454	0.398275	1.3272	7.44644	2.89655	up
GO:0042060	wound healing	biological_process	6	3.86171e-05	ENSRNOG00000010208	Timp1	TIMP metallopeptidase inhibitor 1 [Source:RGD Symbol;Acc:621675]	191.725	124.836	377.443	58.9436	79.8218	69.1842	3.33737	1.73871	up
GO:0042060	wound healing	biological_process	6	3.86171e-05	ENSRNOG00000010278	Il6	interleukin 6 [Source:RGD Symbol;Acc:2901]	3.16485	2.11915	11.0231	0.105601	0.098662	0.045109	65.3927	6.03106	up
GO:0042060	wound healing	biological_process	6	3.86171e-05	ENSRNOG00000011557	S100a8	S100 calcium binding protein A8 [Source:RGD Symbol;Acc:620265]	58.764	26.4357	40.8193	6.86219	14.8878	7.83776	4.25916	2.09057	up
GO:0042060	wound healing	biological_process	6	3.86171e-05	ENSRNOG00000018991	Gsn	gelsolin [Source:RGD Symbol;Acc:1303089]	421.812	450.543	281.254	941.528	460.793	1133.21	0.454977	-1.13614	down
GO:0042060	wound healing	biological_process	6	3.86171e-05	ENSRNOG00000019183	Alox15	arachidonate 15-lipoxygenase [Source:RGD Symbol;Acc:70493]	3.17012	1.75927	2.65063	3.59856	4.73835	17.0034	0.299129	-1.74116	down
GO:0042060	wound healing	biological_process	6	3.86171e-05	ENSRNOG00000058645	Tnc	tenascin C [Source:RGD Symbol;Acc:621057]	32.8819	24.6221	38.6851	10.8562	17.6057	12.6766	2.33817	1.22538	up
GO:0042493	response to drug	biological_process	5	4.78478e-05	ENSRNOG00000002331	Aldh3a1	aldehyde dehydrogenase 3 family, member A1 [Source:RGD Symbol;Acc:2088]	0.906245	1.33741	0.734843	1.81694	2.09876	14.0727	0.165579	-2.59441	down
GO:0042493	response to drug	biological_process	5	4.78478e-05	ENSRNOG00000004473	Ppargc1a	PPARG coactivator 1 alpha [Source:RGD Symbol;Acc:620925]	0.699099	0.733841	0.380414	1.53806	1.6784	1.50382	0.384163	-1.38021	down
GO:0042493	response to drug	biological_process	5	4.78478e-05	ENSRNOG00000007159	Ccl2	C-C motif chemokine ligand 2 [Source:RGD Symbol;Acc:3645]	37.7066	18.9936	41.8423	1.13671	3.71253	3.7896	11.4069	3.51183	up
GO:0042493	response to drug	biological_process	5	4.78478e-05	ENSRNOG00000008656	Snca	synuclein alpha [Source:RGD Symbol;Acc:3729]	0.033831	0	0.067124	0.192924	0.624332	0.823897	0.0615147	-4.02293	down
GO:0042493	response to drug	biological_process	5	4.78478e-05	ENSRNOG00000010278	Il6	interleukin 6 [Source:RGD Symbol;Acc:2901]	3.16485	2.11915	11.0231	0.105601	0.098662	0.045109	65.3927	6.03106	up
GO:0042493	response to drug	biological_process	5	4.78478e-05	ENSRNOG00000012458	Cyp2e1	cytochrome P450, family 2, subfamily e, polypeptide 1 [Source:RGD Symbol;Acc:2475]	1.59029	2.0422	0.503894	5.70974	4.74285	4.83838	0.270512	-1.88624	down
GO:0042493	response to drug	biological_process	5	4.78478e-05	ENSRNOG00000013304	Arg1	arginase 1 [Source:RGD Symbol;Acc:2150]	38.2968	26.0177	49.9768	8.35733	12.4054	14.4375	3.24689	1.69906	up
GO:0042493	response to drug	biological_process	5	4.78478e-05	ENSRNOG00000013973	Lcn2	lipocalin 2 [Source:RGD Symbol;Acc:69408]	1594.83	895.005	2315.86	399.193	738.611	424.407	3.07622	1.62116	up
GO:0042493	response to drug	biological_process	5	4.78478e-05	ENSRNOG00000014320	Inhba	inhibin subunit beta A [Source:RGD Symbol;Acc:62074]	1.43305	0.871656	0.743097	0.137745	0.416838	0.219709	3.93625	1.97682	up
GO:0042493	response to drug	biological_process	5	4.78478e-05	ENSRNOG00000014656	Cox8b	cytochrome c oxidase, subunit VIIIb [Source:RGD Symbol;Acc:2386]	0.277625	0.746188	0	1.76709	3.81586	10.2263	0.0647605	-3.94874	down
GO:0042493	response to drug	biological_process	5	4.78478e-05	ENSRNOG00000019048	Sod2	superoxide dismutase 2 [Source:RGD Symbol;Acc:3732]	144.337	78.5731	208.619	40.7461	61.5904	73.5054	2.45407	1.29518	up
GO:0042493	response to drug	biological_process	5	4.78478e-05	ENSRNOG00000019500	Cyp1a1	cytochrome P450, family 1, subfamily a, polypeptide 1 [Source:RGD Symbol;Acc:2458]	3.79747	8.76837	3.6107	28.2685	25.6761	8.90865	0.25737	-1.95808	down
GO:0042493	response to drug	biological_process	5	4.78478e-05	ENSRNOG00000020263	Atp1a3	ATPase Na+/K+ transporting subunit alpha 3 [Source:RGD Symbol;Acc:2169]	1.61757	1.90245	1.13016	0.671541	0.692308	0.956255	2.0043	1.0031	up
GO:0042493	response to drug	biological_process	5	4.78478e-05	ENSRNOG00000045829	Thbs1	thrombospondin 1 [Source:RGD Symbol;Acc:1588455]	69.4641	106.372	164.303	44.915	55.3273	28.7153	2.6376	1.39923	up
GO:0042493	response to drug	biological_process	5	4.78478e-05	ENSRNOG00000046667	Fosb	FosB proto-oncogene, AP-1 transcription factor subunit [Source:RGD Symbol;Acc:1308198]	4.40301	29.0803	28.1312	2.28038	1.38324	1.99461	10.8894	3.44485	up
GO:0042493	response to drug	biological_process	5	4.78478e-05	ENSRNOG00000059479	Adcy1	adenylate cyclase 1 [Source:RGD Symbol;Acc:1309318]	0.206208	0.356452	0.124273	1.21653	0.813194	0.51294	0.270163	-1.8881	down
GO:0051591	response to cAMP	biological_process	8	5.12537e-05	ENSRNOG00000000158	Cdo1	cysteine dioxygenase type 1 [Source:RGD Symbol;Acc:69262]	13.6117	16.2309	8.62663	48.0212	33.1986	69.6373	0.255005	-1.9714	down
GO:0051591	response to cAMP	biological_process	8	5.12537e-05	ENSRNOG00000000165	Pfkfb1	6-phosphofructo-2-kinase/fructose-2,6-biphosphatase 1 [Source:RGD Symbol;Acc:3307]	1.11783	0.881053	0.727267	4.38349	2.08208	3.12985	0.284109	-1.81548	down
GO:0051591	response to cAMP	biological_process	8	5.12537e-05	ENSRNOG00000002331	Aldh3a1	aldehyde dehydrogenase 3 family, member A1 [Source:RGD Symbol;Acc:2088]	0.906245	1.33741	0.734843	1.81694	2.09876	14.0727	0.165579	-2.59441	down
GO:0051591	response to cAMP	biological_process	8	5.12537e-05	ENSRNOG00000002754	Areg	amphiregulin [Source:RGD Symbol;Acc:2149]	15.0098	32.3225	41.5271	8.39391	7.3053	7.32716	3.85902	1.94824	up
GO:0051591	response to cAMP	biological_process	8	5.12537e-05	ENSRNOG00000019587	Ptprn	protein tyrosine phosphatase, receptor type, N [Source:RGD Symbol;Acc:620777]	3.28822	1.58827	3.5683	0.404913	0.311202	1.36381	4.06013	2.02153	up
GO:0051591	response to cAMP	biological_process	8	5.12537e-05	ENSRNOG00000046667	Fosb	FosB proto-oncogene, AP-1 transcription factor subunit [Source:RGD Symbol;Acc:1308198]	4.40301	29.0803	28.1312	2.28038	1.38324	1.99461	10.8894	3.44485	up
GO:0016491	oxidoreductase activity	molecular_function	4	5.34046e-05	ENSRNOG00000000158	Cdo1	cysteine dioxygenase type 1 [Source:RGD Symbol;Acc:69262]	13.6117	16.2309	8.62663	48.0212	33.1986	69.6373	0.255005	-1.9714	down
GO:0016491	oxidoreductase activity	molecular_function	4	5.34046e-05	ENSRNOG00000002331	Aldh3a1	aldehyde dehydrogenase 3 family, member A1 [Source:RGD Symbol;Acc:2088]	0.906245	1.33741	0.734843	1.81694	2.09876	14.0727	0.165579	-2.59441	down
GO:0016491	oxidoreductase activity	molecular_function	4	5.34046e-05	ENSRNOG00000003510	Fmo2	flavin containing dimethylaniline monoxygenase 2 [Source:RGD Symbol;Acc:628600]	36.2628	40.8993	13.9322	160.378	105.178	155.493	0.216351	-2.20855	down
GO:0016491	oxidoreductase activity	molecular_function	4	5.34046e-05	ENSRNOG00000003620	Fmo3	flavin containing dimethylaniline monoxygenase 3 [Source:RGD Symbol;Acc:619761]	5.58543	7.00354	2.57024	22.1896	18.4762	39.5247	0.18904	-2.40324	down
GO:0016491	oxidoreductase activity	molecular_function	4	5.34046e-05	ENSRNOG00000007069	Adhfe1	alcohol dehydrogenase, iron containing, 1 [Source:RGD Symbol;Acc:1308863]	1.33406	1.55771	0.55276	4.76899	1.84642	4.43534	0.311701	-1.68176	down
GO:0016491	oxidoreductase activity	molecular_function	4	5.34046e-05	ENSRNOG00000008586	Aldh1l2	aldehyde dehydrogenase 1 family, member L2 [Source:RGD Symbol;Acc:1309458]	1.58045	0.639397	1.11351	0.097725	0.378507	0.428929	3.68262	1.88073	up
GO:0016491	oxidoreductase activity	molecular_function	4	5.34046e-05	ENSRNOG00000008656	Snca	synuclein alpha [Source:RGD Symbol;Acc:3729]	0.033831	0	0.067124	0.192924	0.624332	0.823897	0.0615147	-4.02293	down
GO:0016491	oxidoreductase activity	molecular_function	4	5.34046e-05	ENSRNOG00000012436	Adh6	alcohol dehydrogenase 1 (class I) [Source:RGD Symbol;Acc:2044]	3.44215	4.16162	1.57908	6.77746	7.28181	9.62364	0.387742	-1.36683	down
GO:0016491	oxidoreductase activity	molecular_function	4	5.34046e-05	ENSRNOG00000012458	Cyp2e1	cytochrome P450, family 2, subfamily e, polypeptide 1 [Source:RGD Symbol;Acc:2475]	1.59029	2.0422	0.503894	5.70974	4.74285	4.83838	0.270512	-1.88624	down
GO:0016491	oxidoreductase activity	molecular_function	4	5.34046e-05	ENSRNOG00000013521	Dhfr	dihydrofolate reductase [Source:RGD Symbol;Acc:2500]	4.22122	4.13326	5.03549	1.90962	1.4482	2.93528	2.12772	1.08931	up
GO:0016491	oxidoreductase activity	molecular_function	4	5.34046e-05	ENSRNOG00000014117	Hmox1	heme oxygenase 1 [Source:RGD Symbol;Acc:2806]	551.077	151.281	396.168	31.9406	70.2869	56.3487	6.92743	2.79232	up
GO:0016491	oxidoreductase activity	molecular_function	4	5.34046e-05	ENSRNOG00000019048	Sod2	superoxide dismutase 2 [Source:RGD Symbol;Acc:3732]	144.337	78.5731	208.619	40.7461	61.5904	73.5054	2.45407	1.29518	up
GO:0016491	oxidoreductase activity	molecular_function	4	5.34046e-05	ENSRNOG00000019183	Alox15	arachidonate 15-lipoxygenase [Source:RGD Symbol;Acc:70493]	3.17012	1.75927	2.65063	3.59856	4.73835	17.0034	0.299129	-1.74116	down
GO:0016491	oxidoreductase activity	molecular_function	4	5.34046e-05	ENSRNOG00000019500	Cyp1a1	cytochrome P450, family 1, subfamily a, polypeptide 1 [Source:RGD Symbol;Acc:2458]	3.79747	8.76837	3.6107	28.2685	25.6761	8.90865	0.25737	-1.95808	down
GO:0016491	oxidoreductase activity	molecular_function	4	5.34046e-05	ENSRNOG00000032261	Cyp2d4	cytochrome P450, family 2, subfamily d, polypeptide 4 [Source:RGD Symbol;Acc:620640]	3.90219	4.53709	2.88962	9.25606	7.48095	6.29301	0.491919	-1.02351	down
GO:0016491	oxidoreductase activity	molecular_function	4	5.34046e-05	ENSRNOG00000038319	Akr1c19	aldo-keto reductase family 1, member C19 [Source:RGD Symbol;Acc:1562954]	4.58014	5.43589	2.94887	7.99767	9.39868	9.74826	0.477623	-1.06605	down
GO:0016491	oxidoreductase activity	molecular_function	4	5.34046e-05	ENSRNOG00000049851	Fmo6	flavin containing monooxygenase 6 [Source:RGD Symbol;Acc:1559491]	0.023136	0.014864	0.04261	0.734681	0.198205	13.4635	0.00559931	-7.48054	down
GO:0016491	oxidoreductase activity	molecular_function	4	5.34046e-05	ENSRNOG00000056457	Gpd1	glycerol-3-phosphate dehydrogenase 1 [Source:RGD Symbol;Acc:621381]	11.7425	9.46065	12.8299	18.8796	16.7739	36.6629	0.470613	-1.08739	down
GO:0016491	oxidoreductase activity	molecular_function	4	5.34046e-05	ENSRNOG00000058568	Dhrs9	dehydrogenase/reductase 9 [Source:RGD Symbol;Acc:620655]	9.49096	6.67188	18.1665	1.17878	2.82958	3.45117	4.60207	2.20228	up
GO:0016491	oxidoreductase activity	molecular_function	4	5.34046e-05	ENSRNOG00000062125	Aox3	aldehyde oxidase 3 [Source:RGD Symbol;Acc:1359328]	0.87407	1.02473	0.56828	1.87058	1.06784	3.69308	0.372024	-1.42653	down
GO:0032496	response to lipopolysaccharide	biological_process	7	5.77493e-05	ENSRNOG00000001926	Cldn1	claudin 1 [Source:RGD Symbol;Acc:68422]	0.854451	0.532531	0.439747	1.41622	1.43284	1.98282	0.378057	-1.40332	down
GO:0032496	response to lipopolysaccharide	biological_process	7	5.77493e-05	ENSRNOG00000004649	Il1b	interleukin 1 beta [Source:RGD Symbol;Acc:2891]	17.0922	15.7097	15.266	6.22867	5.3594	4.98742	2.89994	1.53602	up
GO:0032496	response to lipopolysaccharide	biological_process	7	5.77493e-05	ENSRNOG00000007159	Ccl2	C-C motif chemokine ligand 2 [Source:RGD Symbol;Acc:3645]	37.7066	18.9936	41.8423	1.13671	3.71253	3.7896	11.4069	3.51183	up
GO:0032496	response to lipopolysaccharide	biological_process	7	5.77493e-05	ENSRNOG00000008656	Snca	synuclein alpha [Source:RGD Symbol;Acc:3729]	0.033831	0	0.067124	0.192924	0.624332	0.823897	0.0615147	-4.02293	down
GO:0032496	response to lipopolysaccharide	biological_process	7	5.77493e-05	ENSRNOG00000010278	Il6	interleukin 6 [Source:RGD Symbol;Acc:2901]	3.16485	2.11915	11.0231	0.105601	0.098662	0.045109	65.3927	6.03106	up
GO:0032496	response to lipopolysaccharide	biological_process	7	5.77493e-05	ENSRNOG00000011039	Gch1	GTP cyclohydrolase 1 [Source:RGD Symbol;Acc:61992]	24.2456	21.4661	37.719	10.8419	15.8192	13.7037	2.06692	1.04748	up
GO:0032496	response to lipopolysaccharide	biological_process	7	5.77493e-05	ENSRNOG00000011557	S100a8	S100 calcium binding protein A8 [Source:RGD Symbol;Acc:620265]	58.764	26.4357	40.8193	6.86219	14.8878	7.83776	4.25916	2.09057	up
GO:0032496	response to lipopolysaccharide	biological_process	7	5.77493e-05	ENSRNOG00000013304	Arg1	arginase 1 [Source:RGD Symbol;Acc:2150]	38.2968	26.0177	49.9768	8.35733	12.4054	14.4375	3.24689	1.69906	up
GO:0032496	response to lipopolysaccharide	biological_process	7	5.77493e-05	ENSRNOG00000019048	Sod2	superoxide dismutase 2 [Source:RGD Symbol;Acc:3732]	144.337	78.5731	208.619	40.7461	61.5904	73.5054	2.45407	1.29518	up
GO:0032496	response to lipopolysaccharide	biological_process	7	5.77493e-05	ENSRNOG00000019500	Cyp1a1	cytochrome P450, family 1, subfamily a, polypeptide 1 [Source:RGD Symbol;Acc:2458]	3.79747	8.76837	3.6107	28.2685	25.6761	8.90865	0.25737	-1.95808	down
GO:0032496	response to lipopolysaccharide	biological_process	7	5.77493e-05	ENSRNOG00000051158	Cfb	complement factor B [Source:RGD Symbol;Acc:2204]	504.105	354.647	440.239	134.428	208.694	220.508	2.30469	1.20457	up
GO:0004499	N,N-dimethylaniline monooxygenase activity	molecular_function	7	6.29548e-05	ENSRNOG00000003510	Fmo2	flavin containing dimethylaniline monoxygenase 2 [Source:RGD Symbol;Acc:628600]	36.2628	40.8993	13.9322	160.378	105.178	155.493	0.216351	-2.20855	down
GO:0004499	N,N-dimethylaniline monooxygenase activity	molecular_function	7	6.29548e-05	ENSRNOG00000003620	Fmo3	flavin containing dimethylaniline monoxygenase 3 [Source:RGD Symbol;Acc:619761]	5.58543	7.00354	2.57024	22.1896	18.4762	39.5247	0.18904	-2.40324	down
GO:0004499	N,N-dimethylaniline monooxygenase activity	molecular_function	7	6.29548e-05	ENSRNOG00000049851	Fmo6	flavin containing monooxygenase 6 [Source:RGD Symbol;Acc:1559491]	0.023136	0.014864	0.04261	0.734681	0.198205	13.4635	0.00559931	-7.48054	down
GO:0050544	arachidonic acid binding	molecular_function	8	6.29548e-05	ENSRNOG00000008656	Snca	synuclein alpha [Source:RGD Symbol;Acc:3729]	0.033831	0	0.067124	0.192924	0.624332	0.823897	0.0615147	-4.02293	down
GO:0050544	arachidonic acid binding	molecular_function	8	6.29548e-05	ENSRNOG00000011483	S100a9	S100 calcium binding protein A9 [Source:RGD Symbol;Acc:620267]	111.507	62.986	76.8319	20.221	25.7548	22.6237	3.66366	1.87329	up
GO:0050544	arachidonic acid binding	molecular_function	8	6.29548e-05	ENSRNOG00000011557	S100a8	S100 calcium binding protein A8 [Source:RGD Symbol;Acc:620265]	58.764	26.4357	40.8193	6.86219	14.8878	7.83776	4.25916	2.09057	up
GO:0007568	aging	biological_process	4	7.89919e-05	ENSRNOG00000001926	Cldn1	claudin 1 [Source:RGD Symbol;Acc:68422]	0.854451	0.532531	0.439747	1.41622	1.43284	1.98282	0.378057	-1.40332	down
GO:0007568	aging	biological_process	4	7.89919e-05	ENSRNOG00000002331	Aldh3a1	aldehyde dehydrogenase 3 family, member A1 [Source:RGD Symbol;Acc:2088]	0.906245	1.33741	0.734843	1.81694	2.09876	14.0727	0.165579	-2.59441	down
GO:0007568	aging	biological_process	4	7.89919e-05	ENSRNOG00000004473	Ppargc1a	PPARG coactivator 1 alpha [Source:RGD Symbol;Acc:620925]	0.699099	0.733841	0.380414	1.53806	1.6784	1.50382	0.384163	-1.38021	down
GO:0007568	aging	biological_process	4	7.89919e-05	ENSRNOG00000007159	Ccl2	C-C motif chemokine ligand 2 [Source:RGD Symbol;Acc:3645]	37.7066	18.9936	41.8423	1.13671	3.71253	3.7896	11.4069	3.51183	up
GO:0007568	aging	biological_process	4	7.89919e-05	ENSRNOG00000008656	Snca	synuclein alpha [Source:RGD Symbol;Acc:3729]	0.033831	0	0.067124	0.192924	0.624332	0.823897	0.0615147	-4.02293	down
GO:0007568	aging	biological_process	4	7.89919e-05	ENSRNOG00000010208	Timp1	TIMP metallopeptidase inhibitor 1 [Source:RGD Symbol;Acc:621675]	191.725	124.836	377.443	58.9436	79.8218	69.1842	3.33737	1.73871	up
GO:0007568	aging	biological_process	4	7.89919e-05	ENSRNOG00000010278	Il6	interleukin 6 [Source:RGD Symbol;Acc:2901]	3.16485	2.11915	11.0231	0.105601	0.098662	0.045109	65.3927	6.03106	up
GO:0007568	aging	biological_process	4	7.89919e-05	ENSRNOG00000013304	Arg1	arginase 1 [Source:RGD Symbol;Acc:2150]	38.2968	26.0177	49.9768	8.35733	12.4054	14.4375	3.24689	1.69906	up
GO:0007568	aging	biological_process	4	7.89919e-05	ENSRNOG00000018839	Ntrk2	neurotrophic receptor tyrosine kinase 2 [Source:RGD Symbol;Acc:3213]	2.74908	5.01041	5.1754	1.89725	0.712652	1.98932	2.81241	1.49181	up
GO:0007568	aging	biological_process	4	7.89919e-05	ENSRNOG00000018991	Gsn	gelsolin [Source:RGD Symbol;Acc:1303089]	421.812	450.543	281.254	941.528	460.793	1133.21	0.454977	-1.13614	down
GO:0007568	aging	biological_process	4	7.89919e-05	ENSRNOG00000019048	Sod2	superoxide dismutase 2 [Source:RGD Symbol;Acc:3732]	144.337	78.5731	208.619	40.7461	61.5904	73.5054	2.45407	1.29518	up
GO:0007568	aging	biological_process	4	7.89919e-05	ENSRNOG00000019500	Cyp1a1	cytochrome P450, family 1, subfamily a, polypeptide 1 [Source:RGD Symbol;Acc:2458]	3.79747	8.76837	3.6107	28.2685	25.6761	8.90865	0.25737	-1.95808	down
GO:0005200	structural constituent of cytoskeleton	molecular_function	4	9.39694e-05	ENSRNOG00000006911	Sptb	spectrin, beta, erythrocytic [Source:RGD Symbol;Acc:1303243]	0.235205	0.252763	0.222021	0.570131	0.443805	1.02519	0.348183	-1.52208	down
GO:0005200	structural constituent of cytoskeleton	molecular_function	4	9.39694e-05	ENSRNOG00000014099	Krt15	keratin 15 [Source:RGD Symbol;Acc:1303044]	0.401932	0.587568	0.379119	2.4004	0.959421	28.7987	0.0425586	-4.55441	down
GO:0005200	structural constituent of cytoskeleton	molecular_function	4	9.39694e-05	ENSRNOG00000015903	Add2	adducin 2 [Source:RGD Symbol;Acc:2042]	0.471254	0.687281	0.447776	1.00894	1.70809	1.63371	0.369205	-1.43751	down
GO:0005200	structural constituent of cytoskeleton	molecular_function	4	9.39694e-05	ENSRNOG00000018371	Tubb6	tubulin, beta 6 class V [Source:RGD Symbol;Acc:1305887]	51.3781	46.6999	62.9911	19.1659	30.0293	30.0424	2.03274	1.02342	up
GO:0005200	structural constituent of cytoskeleton	molecular_function	4	9.39694e-05	ENSRNOG00000031785	Krt76	keratin 76 [Source:RGD Symbol;Acc:1303078]	2.72698	3.83802	2.32731	6.86724	7.84121	9.47513	0.367701	-1.4434	down
GO:0005200	structural constituent of cytoskeleton	molecular_function	4	9.39694e-05	ENSRNOG00000048169	Tuba8	tubulin, alpha 8 [Source:RGD Symbol;Acc:1566041]	3.55351	3.77764	3.98149	1.19674	1.13894	1.48065	2.96428	1.56768	up
GO:0032922	circadian regulation of gene expression	biological_process	5	0.000105184	ENSRNOG00000004473	Ppargc1a	PPARG coactivator 1 alpha [Source:RGD Symbol;Acc:620925]	0.699099	0.733841	0.380414	1.53806	1.6784	1.50382	0.384163	-1.38021	down
GO:0032922	circadian regulation of gene expression	biological_process	5	0.000105184	ENSRNOG00000006663	Usp2	ubiquitin specific peptidase 2 [Source:RGD Symbol;Acc:621073]	1.18283	1.2068	0.978434	2.11364	2.35493	3.93105	0.400979	-1.3184	down
GO:0032922	circadian regulation of gene expression	biological_process	5	0.000105184	ENSRNOG00000014448	Arntl	aryl hydrocarbon receptor nuclear translocator-like [Source:RGD Symbol;Acc:62003]	7.69285	5.52374	7.07682	4.26659	2.17754	3.16265	2.1124	1.07889	up
GO:0032922	circadian regulation of gene expression	biological_process	5	0.000105184	ENSRNOG00000018413	Per3	period circadian regulator 3 [Source:RGD Symbol;Acc:621581]	4.81173	7.50402	4.2525	12.0606	17.1225	18.8685	0.344801	-1.53616	down
GO:0032922	circadian regulation of gene expression	biological_process	5	0.000105184	ENSRNOG00000019422	Egr1	early growth response 1 [Source:RGD Symbol;Acc:2544]	28.8778	81.6766	49.115	5.6807	12.1778	9.44428	5.8481	2.54797	up
GO:0032922	circadian regulation of gene expression	biological_process	5	0.000105184	ENSRNOG00000020254	Per2	period circadian regulator 2 [Source:RGD Symbol;Acc:61945]	5.08553	8.59563	7.97541	10.986	14.3571	23.4713	0.443651	-1.1725	down
GO:0051775	response to redox state	biological_process	4	0.000108958	ENSRNOG00000010210	Slc7a11	solute carrier family 7 member 11 [Source:RGD Symbol;Acc:1309275]	0.785658	0.686638	0.778759	0.116861	0.130128	0.355379	3.73701	1.90188	up
GO:0051775	response to redox state	biological_process	4	0.000108958	ENSRNOG00000014448	Arntl	aryl hydrocarbon receptor nuclear translocator-like [Source:RGD Symbol;Acc:62003]	7.69285	5.52374	7.07682	4.26659	2.17754	3.16265	2.1124	1.07889	up
GO:0051775	response to redox state	biological_process	4	0.000108958	ENSRNOG00000017060	Ryr2	ryanodine receptor 2 [Source:RGD Symbol;Acc:620314]	0.186399	0.211602	0.108926	0.285075	0.300051	1.47817	0.245687	-2.0251	down
GO:0051384	response to glucocorticoid	biological_process	8	0.000135719	ENSRNOG00000000158	Cdo1	cysteine dioxygenase type 1 [Source:RGD Symbol;Acc:69262]	13.6117	16.2309	8.62663	48.0212	33.1986	69.6373	0.255005	-1.9714	down
GO:0051384	response to glucocorticoid	biological_process	8	0.000135719	ENSRNOG00000000165	Pfkfb1	6-phosphofructo-2-kinase/fructose-2,6-biphosphatase 1 [Source:RGD Symbol;Acc:3307]	1.11783	0.881053	0.727267	4.38349	2.08208	3.12985	0.284109	-1.81548	down
GO:0051384	response to glucocorticoid	biological_process	8	0.000135719	ENSRNOG00000002331	Aldh3a1	aldehyde dehydrogenase 3 family, member A1 [Source:RGD Symbol;Acc:2088]	0.906245	1.33741	0.734843	1.81694	2.09876	14.0727	0.165579	-2.59441	down
GO:0051384	response to glucocorticoid	biological_process	8	0.000135719	ENSRNOG00000002754	Areg	amphiregulin [Source:RGD Symbol;Acc:2149]	15.0098	32.3225	41.5271	8.39391	7.3053	7.32716	3.85902	1.94824	up
GO:0051384	response to glucocorticoid	biological_process	8	0.000135719	ENSRNOG00000002792	Cxcl2	C-X-C motif chemokine ligand 2 [Source:RGD Symbol;Acc:70069]	2.67869	3.89774	3.91406	0.2245	0.858824	0.310974	7.52384	2.91147	up
GO:0051384	response to glucocorticoid	biological_process	8	0.000135719	ENSRNOG00000005871	Il1rn	interleukin 1 receptor antagonist [Source:RGD Symbol;Acc:621159]	38.7998	25.085	37.5114	15.4297	14.5177	9.55624	2.56675	1.35995	up
GO:0051384	response to glucocorticoid	biological_process	8	0.000135719	ENSRNOG00000007159	Ccl2	C-C motif chemokine ligand 2 [Source:RGD Symbol;Acc:3645]	37.7066	18.9936	41.8423	1.13671	3.71253	3.7896	11.4069	3.51183	up
GO:0032868	response to insulin	biological_process	7	0.000135719	ENSRNOG00000000165	Pfkfb1	6-phosphofructo-2-kinase/fructose-2,6-biphosphatase 1 [Source:RGD Symbol;Acc:3307]	1.11783	0.881053	0.727267	4.38349	2.08208	3.12985	0.284109	-1.81548	down
GO:0032868	response to insulin	biological_process	7	0.000135719	ENSRNOG00000000640	Egr2	early growth response 2 [Source:RGD Symbol;Acc:621608]	3.15739	6.1992	6.47142	1.3654	1.96587	0.959568	3.68879	1.88315	up
GO:0032868	response to insulin	biological_process	7	0.000135719	ENSRNOG00000008176	Nppa	natriuretic peptide A [Source:RGD Symbol;Acc:3193]	0	0	0	0	0	4.77912	6.27731e-05	-13.9595	down
GO:0032868	response to insulin	biological_process	7	0.000135719	ENSRNOG00000010278	Il6	interleukin 6 [Source:RGD Symbol;Acc:2901]	3.16485	2.11915	11.0231	0.105601	0.098662	0.045109	65.3927	6.03106	up
GO:0032868	response to insulin	biological_process	7	0.000135719	ENSRNOG00000017808	Klf15	Kruppel-like factor 15 [Source:RGD Symbol;Acc:70918]	4.0834	7.67358	3.25876	24.0662	14.6325	13.7301	0.286403	-1.80388	down
GO:0032868	response to insulin	biological_process	7	0.000135719	ENSRNOG00000019422	Egr1	early growth response 1 [Source:RGD Symbol;Acc:2544]	28.8778	81.6766	49.115	5.6807	12.1778	9.44428	5.8481	2.54797	up
GO:0032868	response to insulin	biological_process	7	0.000135719	ENSRNOG00000019587	Ptprn	protein tyrosine phosphatase, receptor type, N [Source:RGD Symbol;Acc:620777]	3.28822	1.58827	3.5683	0.404913	0.311202	1.36381	4.06013	2.02153	up
GO:0010460	positive regulation of heart rate	biological_process	10	0.000155545	ENSRNOG00000004400	Avpr1a	arginine vasopressin receptor 1A [Source:RGD Symbol;Acc:2185]	0.884247	0.991065	0.583946	1.63749	2.34024	1.80556	0.425235	-1.23367	down
GO:0010460	positive regulation of heart rate	biological_process	10	0.000155545	ENSRNOG00000008176	Nppa	natriuretic peptide A [Source:RGD Symbol;Acc:3193]	0	0	0	0	0	4.77912	6.27731e-05	-13.9595	down
GO:0010460	positive regulation of heart rate	biological_process	10	0.000155545	ENSRNOG00000011039	Gch1	GTP cyclohydrolase 1 [Source:RGD Symbol;Acc:61992]	24.2456	21.4661	37.719	10.8419	15.8192	13.7037	2.06692	1.04748	up
GO:0010460	positive regulation of heart rate	biological_process	10	0.000155545	ENSRNOG00000017060	Ryr2	ryanodine receptor 2 [Source:RGD Symbol;Acc:620314]	0.186399	0.211602	0.108926	0.285075	0.300051	1.47817	0.245687	-2.0251	down
GO:0050900	leukocyte migration	biological_process	4	0.000155545	ENSRNOG00000002723	Sele	selectin E [Source:RGD Symbol;Acc:3654]	2.98187	1.19921	3.6168	0.148222	0.414433	0.461137	7.61667	2.92916	up
GO:0050900	leukocyte migration	biological_process	4	0.000155545	ENSRNOG00000002794	Selp	selectin P [Source:RGD Symbol;Acc:3656]	3.596	2.43421	6.01392	0.725463	1.69202	1.63187	2.97434	1.57257	up
GO:0050900	leukocyte migration	biological_process	4	0.000155545	ENSRNOG00000004649	Il1b	interleukin 1 beta [Source:RGD Symbol;Acc:2891]	17.0922	15.7097	15.266	6.22867	5.3594	4.98742	2.89994	1.53602	up
GO:0050900	leukocyte migration	biological_process	4	0.000155545	ENSRNOG00000015903	Add2	adducin 2 [Source:RGD Symbol;Acc:2042]	0.471254	0.687281	0.447776	1.00894	1.70809	1.63371	0.369205	-1.43751	down
GO:0060137	maternal process involved in parturition	biological_process	5	0.000172415	ENSRNOG00000007159	Ccl2	C-C motif chemokine ligand 2 [Source:RGD Symbol;Acc:3645]	37.7066	18.9936	41.8423	1.13671	3.71253	3.7896	11.4069	3.51183	up
GO:0060137	maternal process involved in parturition	biological_process	5	0.000172415	ENSRNOG00000014448	Arntl	aryl hydrocarbon receptor nuclear translocator-like [Source:RGD Symbol;Acc:62003]	7.69285	5.52374	7.07682	4.26659	2.17754	3.16265	2.1124	1.07889	up
GO:0060137	maternal process involved in parturition	biological_process	5	0.000172415	ENSRNOG00000019500	Cyp1a1	cytochrome P450, family 1, subfamily a, polypeptide 1 [Source:RGD Symbol;Acc:2458]	3.79747	8.76837	3.6107	28.2685	25.6761	8.90865	0.25737	-1.95808	down
GO:0009635	response to herbicide	biological_process	5	0.000172415	ENSRNOG00000013304	Arg1	arginase 1 [Source:RGD Symbol;Acc:2150]	38.2968	26.0177	49.9768	8.35733	12.4054	14.4375	3.24689	1.69906	up
GO:0009635	response to herbicide	biological_process	5	0.000172415	ENSRNOG00000013973	Lcn2	lipocalin 2 [Source:RGD Symbol;Acc:69408]	1594.83	895.005	2315.86	399.193	738.611	424.407	3.07622	1.62116	up
GO:0009635	response to herbicide	biological_process	5	0.000172415	ENSRNOG00000019500	Cyp1a1	cytochrome P450, family 1, subfamily a, polypeptide 1 [Source:RGD Symbol;Acc:2458]	3.79747	8.76837	3.6107	28.2685	25.6761	8.90865	0.25737	-1.95808	down
GO:0051602	response to electrical stimulus	biological_process	5	0.00018128	ENSRNOG00000004473	Ppargc1a	PPARG coactivator 1 alpha [Source:RGD Symbol;Acc:620925]	0.699099	0.733841	0.380414	1.53806	1.6784	1.50382	0.384163	-1.38021	down
GO:0051602	response to electrical stimulus	biological_process	5	0.00018128	ENSRNOG00000010278	Il6	interleukin 6 [Source:RGD Symbol;Acc:2901]	3.16485	2.11915	11.0231	0.105601	0.098662	0.045109	65.3927	6.03106	up
GO:0051602	response to electrical stimulus	biological_process	5	0.00018128	ENSRNOG00000018827	LOC103694905	5-hydroxytryptamine receptor 7 [Source:RGD Symbol;Acc:9265298]	0.601136	0.302224	0.67299	0.0940072	0.184716	0.168906	3.52156	1.81621	up
GO:0051602	response to electrical stimulus	biological_process	5	0.00018128	ENSRNOG00000019048	Sod2	superoxide dismutase 2 [Source:RGD Symbol;Acc:3732]	144.337	78.5731	208.619	40.7461	61.5904	73.5054	2.45407	1.29518	up
GO:0051602	response to electrical stimulus	biological_process	5	0.00018128	ENSRNOG00000019433	Rab3a	RAB3A, member RAS oncogene family [Source:RGD Symbol;Acc:3528]	5.25359	6.66674	3.95532	13.6283	11.8968	8.19245	0.470843	-1.08668	down
GO:0005506	iron ion binding	molecular_function	8	0.00018547	ENSRNOG00000000158	Cdo1	cysteine dioxygenase type 1 [Source:RGD Symbol;Acc:69262]	13.6117	16.2309	8.62663	48.0212	33.1986	69.6373	0.255005	-1.9714	down
GO:0005506	iron ion binding	molecular_function	8	0.00018547	ENSRNOG00000012458	Cyp2e1	cytochrome P450, family 2, subfamily e, polypeptide 1 [Source:RGD Symbol;Acc:2475]	1.59029	2.0422	0.503894	5.70974	4.74285	4.83838	0.270512	-1.88624	down
GO:0005506	iron ion binding	molecular_function	8	0.00018547	ENSRNOG00000013973	Lcn2	lipocalin 2 [Source:RGD Symbol;Acc:69408]	1594.83	895.005	2315.86	399.193	738.611	424.407	3.07622	1.62116	up
GO:0005506	iron ion binding	molecular_function	8	0.00018547	ENSRNOG00000019183	Alox15	arachidonate 15-lipoxygenase [Source:RGD Symbol;Acc:70493]	3.17012	1.75927	2.65063	3.59856	4.73835	17.0034	0.299129	-1.74116	down
GO:0005506	iron ion binding	molecular_function	8	0.00018547	ENSRNOG00000019500	Cyp1a1	cytochrome P450, family 1, subfamily a, polypeptide 1 [Source:RGD Symbol;Acc:2458]	3.79747	8.76837	3.6107	28.2685	25.6761	8.90865	0.25737	-1.95808	down
GO:0005506	iron ion binding	molecular_function	8	0.00018547	ENSRNOG00000028891	Cyp2t1	cytochrome P450, family 2, subfamily t, polypeptide 1 [Source:RGD Symbol;Acc:620086]	2.88466	3.24066	2.34437	4.17459	4.32691	8.6706	0.493224	-1.01969	down
GO:0005506	iron ion binding	molecular_function	8	0.00018547	ENSRNOG00000032261	Cyp2d4	cytochrome P450, family 2, subfamily d, polypeptide 4 [Source:RGD Symbol;Acc:620640]	3.90219	4.53709	2.88962	9.25606	7.48095	6.29301	0.491919	-1.02351	down
GO:0005506	iron ion binding	molecular_function	8	0.00018547	ENSRNOG00000045989	Hba-a3	hemoglobin alpha, adult chain 3 [Source:RGD Symbol;Acc:1359209]	29.1036	33.0564	24.4265	54.478	69.3314	104.209	0.379734	-1.39694	down
GO:0005506	iron ion binding	molecular_function	8	0.00018547	ENSRNOG00000047321	Hba-a2	hemoglobin alpha, adult chain 2 [Source:RGD Symbol;Acc:1359364]	622.608	817.629	600.355	1003.7	1375.98	1844.64	0.483058	-1.04973	down
GO:0005506	iron ion binding	molecular_function	8	0.00018547	ENSRNOG00000062125	Aox3	aldehyde oxidase 3 [Source:RGD Symbol;Acc:1359328]	0.87407	1.02473	0.56828	1.87058	1.06784	3.69308	0.372024	-1.42653	down
GO:0019825	oxygen binding	molecular_function	5	0.000192167	ENSRNOG00000019048	Sod2	superoxide dismutase 2 [Source:RGD Symbol;Acc:3732]	144.337	78.5731	208.619	40.7461	61.5904	73.5054	2.45407	1.29518	up
GO:0019825	oxygen binding	molecular_function	5	0.000192167	ENSRNOG00000028891	Cyp2t1	cytochrome P450, family 2, subfamily t, polypeptide 1 [Source:RGD Symbol;Acc:620086]	2.88466	3.24066	2.34437	4.17459	4.32691	8.6706	0.493224	-1.01969	down
GO:0019825	oxygen binding	molecular_function	5	0.000192167	ENSRNOG00000045989	Hba-a3	hemoglobin alpha, adult chain 3 [Source:RGD Symbol;Acc:1359209]	29.1036	33.0564	24.4265	54.478	69.3314	104.209	0.379734	-1.39694	down
GO:0019825	oxygen binding	molecular_function	5	0.000192167	ENSRNOG00000047321	Hba-a2	hemoglobin alpha, adult chain 2 [Source:RGD Symbol;Acc:1359364]	622.608	817.629	600.355	1003.7	1375.98	1844.64	0.483058	-1.04973	down
GO:0001570	vasculogenesis	biological_process	6	0.000196736	ENSRNOG00000004854	Has2	hyaluronan synthase 2 [Source:RGD Symbol;Acc:2781]	0.632455	0.404069	0.485014	0.116629	0.11933	0.20685	3.4361	1.78077	up
GO:0001570	vasculogenesis	biological_process	6	0.000196736	ENSRNOG00000006569	Itgb8	integrin subunit beta 8 [Source:RGD Symbol;Acc:1311374]	2.69064	1.81036	3.42008	0.970632	0.984076	0.573387	3.13322	1.64765	up
GO:0001570	vasculogenesis	biological_process	6	0.000196736	ENSRNOG00000016181	Tbx20	T-box 20 [Source:RGD Symbol;Acc:1309396]	0	0	0	0	0	0.778032	0.000385588	-11.3407	down
GO:0001570	vasculogenesis	biological_process	6	0.000196736	ENSRNOG00000018839	Ntrk2	neurotrophic receptor tyrosine kinase 2 [Source:RGD Symbol;Acc:3213]	2.74908	5.01041	5.1754	1.89725	0.712652	1.98932	2.81241	1.49181	up
GO:0001570	vasculogenesis	biological_process	6	0.000196736	ENSRNOG00000019622	Ackr3	atypical chemokine receptor 3 [Source:RGD Symbol;Acc:620601]	76.304	96.1834	133.552	44.5313	43.6139	45.7138	2.28628	1.193	up
GO:0001570	vasculogenesis	biological_process	6	0.000196736	ENSRNOG00000042838	Junb	JunB proto-oncogene, AP-1 transcription factor subunit [Source:RGD Symbol;Acc:2944]	78.6986	148.666	117.666	59.4441	49.5459	34.9588	2.39689	1.26117	up
GO:0008284	positive regulation of cell population proliferation	biological_process	7	0.000217121	ENSRNOG00000002331	Aldh3a1	aldehyde dehydrogenase 3 family, member A1 [Source:RGD Symbol;Acc:2088]	0.906245	1.33741	0.734843	1.81694	2.09876	14.0727	0.165579	-2.59441	down
GO:0008284	positive regulation of cell population proliferation	biological_process	7	0.000217121	ENSRNOG00000002754	Areg	amphiregulin [Source:RGD Symbol;Acc:2149]	15.0098	32.3225	41.5271	8.39391	7.3053	7.32716	3.85902	1.94824	up
GO:0008284	positive regulation of cell population proliferation	biological_process	7	0.000217121	ENSRNOG00000002771	Ereg	epiregulin [Source:RGD Symbol;Acc:620299]	3.53527	6.81166	10.5663	1.17724	1.04308	1.27508	5.98307	2.58089	up
GO:0008284	positive regulation of cell population proliferation	biological_process	7	0.000217121	ENSRNOG00000003745	Atf3	activating transcription factor 3 [Source:RGD Symbol;Acc:2165]	10.4013	37.4337	46.2986	3.78197	4.08518	7.17428	6.25829	2.64577	up
GO:0008284	positive regulation of cell population proliferation	biological_process	7	0.000217121	ENSRNOG00000004400	Avpr1a	arginine vasopressin receptor 1A [Source:RGD Symbol;Acc:2185]	0.884247	0.991065	0.583946	1.63749	2.34024	1.80556	0.425235	-1.23367	down
GO:0008284	positive regulation of cell population proliferation	biological_process	7	0.000217121	ENSRNOG00000004470	Il24	interleukin 24 [Source:RGD Symbol;Acc:621484]	4.71744	2.76935	8.35128	0.401454	0.398275	1.3272	7.44644	2.89655	up
GO:0008284	positive regulation of cell population proliferation	biological_process	7	0.000217121	ENSRNOG00000004649	Il1b	interleukin 1 beta [Source:RGD Symbol;Acc:2891]	17.0922	15.7097	15.266	6.22867	5.3594	4.98742	2.89994	1.53602	up
GO:0008284	positive regulation of cell population proliferation	biological_process	7	0.000217121	ENSRNOG00000004854	Has2	hyaluronan synthase 2 [Source:RGD Symbol;Acc:2781]	0.632455	0.404069	0.485014	0.116629	0.11933	0.20685	3.4361	1.78077	up
GO:0008284	positive regulation of cell population proliferation	biological_process	7	0.000217121	ENSRNOG00000007002	Lif	LIF, interleukin 6 family cytokine [Source:RGD Symbol;Acc:620865]	2.79472	2.7336	5.46239	0.880568	1.01865	1.04408	3.73414	1.90078	up
GO:0008284	positive regulation of cell population proliferation	biological_process	7	0.000217121	ENSRNOG00000010208	Timp1	TIMP metallopeptidase inhibitor 1 [Source:RGD Symbol;Acc:621675]	191.725	124.836	377.443	58.9436	79.8218	69.1842	3.33737	1.73871	up
GO:0008284	positive regulation of cell population proliferation	biological_process	7	0.000217121	ENSRNOG00000010797	Esm1	endothelial cell-specific molecule 1 [Source:RGD Symbol;Acc:71013]	0.637304	0.835068	0.784875	3.70227	1.94073	1.20847	0.329454	-1.60185	down
GO:0008284	positive regulation of cell population proliferation	biological_process	7	0.000217121	ENSRNOG00000018839	Ntrk2	neurotrophic receptor tyrosine kinase 2 [Source:RGD Symbol;Acc:3213]	2.74908	5.01041	5.1754	1.89725	0.712652	1.98932	2.81241	1.49181	up
GO:0008284	positive regulation of cell population proliferation	biological_process	7	0.000217121	ENSRNOG00000033192	Osmr	oncostatin M receptor [Source:RGD Symbol;Acc:1302983]	11.718	9.37308	19.7537	4.6298	7.5865	6.30735	2.20501	1.14079	up
GO:0008284	positive regulation of cell population proliferation	biological_process	7	0.000217121	ENSRNOG00000038909	Pou3f3	POU class 3 homeobox 3 [Source:RGD Symbol;Acc:619768]	0	1.4154	0	0	0	0	4718.01	12.204	up
GO:0008284	positive regulation of cell population proliferation	biological_process	7	0.000217121	ENSRNOG00000045829	Thbs1	thrombospondin 1 [Source:RGD Symbol;Acc:1588455]	69.4641	106.372	164.303	44.915	55.3273	28.7153	2.6376	1.39923	up
GO:0008284	positive regulation of cell population proliferation	biological_process	7	0.000217121	ENSRNOG00000058645	Tnc	tenascin C [Source:RGD Symbol;Acc:621057]	32.8819	24.6221	38.6851	10.8562	17.6057	12.6766	2.33817	1.22538	up
GO:0002933	lipid hydroxylation	biological_process	8	0.000220407	ENSRNOG00000012458	Cyp2e1	cytochrome P450, family 2, subfamily e, polypeptide 1 [Source:RGD Symbol;Acc:2475]	1.59029	2.0422	0.503894	5.70974	4.74285	4.83838	0.270512	-1.88624	down
GO:0002933	lipid hydroxylation	biological_process	8	0.000220407	ENSRNOG00000019500	Cyp1a1	cytochrome P450, family 1, subfamily a, polypeptide 1 [Source:RGD Symbol;Acc:2458]	3.79747	8.76837	3.6107	28.2685	25.6761	8.90865	0.25737	-1.95808	down
GO:0031727	CCR2 chemokine receptor binding	molecular_function	9	0.000220407	ENSRNOG00000000239	Ccl7	C-C motif chemokine ligand 7 [Source:RGD Symbol;Acc:1359152]	14.4232	11.1589	18.1968	0.371988	1.4184	3.33763	8.53719	3.09376	up
GO:0031727	CCR2 chemokine receptor binding	molecular_function	9	0.000220407	ENSRNOG00000007159	Ccl2	C-C motif chemokine ligand 2 [Source:RGD Symbol;Acc:3645]	37.7066	18.9936	41.8423	1.13671	3.71253	3.7896	11.4069	3.51183	up
GO:0070965	positive regulation of neutrophil mediated killing of fungus	biological_process	9	0.000220407	ENSRNOG00000002802	Cxcl1	C-X-C motif chemokine ligand 1 [Source:RGD Symbol;Acc:619869]	37.7589	31.9443	77.5216	7.05145	18.0701	6.03944	4.72466	2.24021	up
GO:0070965	positive regulation of neutrophil mediated killing of fungus	biological_process	9	0.000220407	ENSRNOG00000013304	Arg1	arginase 1 [Source:RGD Symbol;Acc:2150]	38.2968	26.0177	49.9768	8.35733	12.4054	14.4375	3.24689	1.69906	up
GO:0070488	neutrophil aggregation	biological_process	8	0.000220407	ENSRNOG00000011483	S100a9	S100 calcium binding protein A9 [Source:RGD Symbol;Acc:620267]	111.507	62.986	76.8319	20.221	25.7548	22.6237	3.66366	1.87329	up
GO:0070488	neutrophil aggregation	biological_process	8	0.000220407	ENSRNOG00000011557	S100a8	S100 calcium binding protein A8 [Source:RGD Symbol;Acc:620265]	58.764	26.4357	40.8193	6.86219	14.8878	7.83776	4.25916	2.09057	up
GO:0070052	collagen V binding	molecular_function	6	0.000220407	ENSRNOG00000045684	LOC100910978	extracellular matrix protein 2-like [Source:RGD Symbol;Acc:6495594]	2.20831	2.37103	1.28465	3.92303	4.91467	5.89374	0.39806	-1.32894	down
GO:0070052	collagen V binding	molecular_function	6	0.000220407	ENSRNOG00000045829	Thbs1	thrombospondin 1 [Source:RGD Symbol;Acc:1588455]	69.4641	106.372	164.303	44.915	55.3273	28.7153	2.6376	1.39923	up
GO:0048511	rhythmic process	biological_process	3	0.000238296	ENSRNOG00000004473	Ppargc1a	PPARG coactivator 1 alpha [Source:RGD Symbol;Acc:620925]	0.699099	0.733841	0.380414	1.53806	1.6784	1.50382	0.384163	-1.38021	down
GO:0048511	rhythmic process	biological_process	3	0.000238296	ENSRNOG00000006663	Usp2	ubiquitin specific peptidase 2 [Source:RGD Symbol;Acc:621073]	1.18283	1.2068	0.978434	2.11364	2.35493	3.93105	0.400979	-1.3184	down
GO:0048511	rhythmic process	biological_process	3	0.000238296	ENSRNOG00000011668	Nfil3	nuclear factor, interleukin 3 regulated [Source:RGD Symbol;Acc:620972]	8.36549	8.08717	16.2594	4.32403	3.116	5.24537	2.57872	1.36665	up
GO:0048511	rhythmic process	biological_process	3	0.000238296	ENSRNOG00000019383	Tef	TEF transcription factor, PAR bZIP family member [Source:RGD Symbol;Acc:3841]	23.7942	29.9373	18.417	43.5098	55.0498	60.271	0.454249	-1.13845	down
GO:0048511	rhythmic process	biological_process	3	0.000238296	ENSRNOG00000020254	Per2	period circadian regulator 2 [Source:RGD Symbol;Acc:61945]	5.08553	8.59563	7.97541	10.986	14.3571	23.4713	0.443651	-1.1725	down
GO:0048511	rhythmic process	biological_process	3	0.000238296	ENSRNOG00000021027	Dbp	D-box binding PAR bZIP transcription factor [Source:RGD Symbol;Acc:2491]	8.27444	13.9751	6.57459	23.8057	42.1863	32.955	0.291308	-1.77938	down
GO:0002544	chronic inflammatory response	biological_process	7	0.000255779	ENSRNOG00000007159	Ccl2	C-C motif chemokine ligand 2 [Source:RGD Symbol;Acc:3645]	37.7066	18.9936	41.8423	1.13671	3.71253	3.7896	11.4069	3.51183	up
GO:0002544	chronic inflammatory response	biological_process	7	0.000255779	ENSRNOG00000011557	S100a8	S100 calcium binding protein A8 [Source:RGD Symbol;Acc:620265]	58.764	26.4357	40.8193	6.86219	14.8878	7.83776	4.25916	2.09057	up
GO:0002544	chronic inflammatory response	biological_process	7	0.000255779	ENSRNOG00000045829	Thbs1	thrombospondin 1 [Source:RGD Symbol;Acc:1588455]	69.4641	106.372	164.303	44.915	55.3273	28.7153	2.6376	1.39923	up
GO:0055013	cardiac muscle cell development	biological_process	8	0.000255779	ENSRNOG00000005555	Lrrc10	leucine-rich repeat-containing protein 10-like [Source:RGD Symbol;Acc:6495036]	0	0	0	0	0	3.58154	8.37629e-05	-13.5433	down
GO:0055013	cardiac muscle cell development	biological_process	8	0.000255779	ENSRNOG00000011659	Alpk3	alpha-kinase 3 [Source:RGD Symbol;Acc:1309860]	1.62658	1.4918	1.26337	5.20656	2.66985	2.29666	0.430719	-1.21518	down
GO:0055013	cardiac muscle cell development	biological_process	8	0.000255779	ENSRNOG00000049607	LOC100911101	leucine-rich repeat-containing 10 [Source:RGD Symbol;Acc:1307358]	0	0	0	0	0	4.63893	6.46701e-05	-13.9165	down
GO:0060048	cardiac muscle contraction	biological_process	8	0.000266975	ENSRNOG00000002372	Sgcd	sarcoglycan, delta [Source:RGD Symbol;Acc:1306638]	0.93466	1.49454	1.00184	2.76866	3.11875	2.25635	0.421309	-1.24705	down
GO:0060048	cardiac muscle contraction	biological_process	8	0.000266975	ENSRNOG00000007290	Atp1a2	ATPase Na+/K+ transporting subunit alpha 2 [Source:RGD Symbol;Acc:2168]	1.11361	2.2107	0.439613	6.02731	3.2216	13.5037	0.165429	-2.59572	down
GO:0060048	cardiac muscle contraction	biological_process	8	0.000266975	ENSRNOG00000016983	Myh7	myosin heavy chain 7 [Source:RGD Symbol;Acc:62030]	0	0.002143	0	0.00806	0.008274	5.03787	0.000424004	-11.2036	down
GO:0060048	cardiac muscle contraction	biological_process	8	0.000266975	ENSRNOG00000017060	Ryr2	ryanodine receptor 2 [Source:RGD Symbol;Acc:620314]	0.186399	0.211602	0.108926	0.285075	0.300051	1.47817	0.245687	-2.0251	down
GO:0060048	cardiac muscle contraction	biological_process	8	0.000266975	ENSRNOG00000020263	Atp1a3	ATPase Na+/K+ transporting subunit alpha 3 [Source:RGD Symbol;Acc:2169]	1.61757	1.90245	1.13016	0.671541	0.692308	0.956255	2.0043	1.0031	up
GO:0031669	cellular response to nutrient levels	biological_process	7	0.000361385	ENSRNOG00000010278	Il6	interleukin 6 [Source:RGD Symbol;Acc:2901]	3.16485	2.11915	11.0231	0.105601	0.098662	0.045109	65.3927	6.03106	up
GO:0031669	cellular response to nutrient levels	biological_process	7	0.000361385	ENSRNOG00000013973	Lcn2	lipocalin 2 [Source:RGD Symbol;Acc:69408]	1594.83	895.005	2315.86	399.193	738.611	424.407	3.07622	1.62116	up
GO:0031669	cellular response to nutrient levels	biological_process	7	0.000361385	ENSRNOG00000033261	Fam107a	family with sequence similarity 107, member A [Source:RGD Symbol;Acc:1306327]	1.69277	1.16438	0.665421	3.69912	2.16074	4.27099	0.347707	-1.52406	down
GO:0035914	skeletal muscle cell differentiation	biological_process	6	0.000380384	ENSRNOG00000000640	Egr2	early growth response 2 [Source:RGD Symbol;Acc:621608]	3.15739	6.1992	6.47142	1.3654	1.96587	0.959568	3.68879	1.88315	up
GO:0035914	skeletal muscle cell differentiation	biological_process	6	0.000380384	ENSRNOG00000002456	Hlf	HLF transcription factor, PAR bZIP family member [Source:RGD Symbol;Acc:1582828]	2.24187	2.70773	1.96198	5.66715	7.0465	4.85039	0.393508	-1.34554	down
GO:0035914	skeletal muscle cell differentiation	biological_process	6	0.000380384	ENSRNOG00000003745	Atf3	activating transcription factor 3 [Source:RGD Symbol;Acc:2165]	10.4013	37.4337	46.2986	3.78197	4.08518	7.17428	6.25829	2.64577	up
GO:0035914	skeletal muscle cell differentiation	biological_process	6	0.000380384	ENSRNOG00000006776	Smyd1	SET and MYND domain containing 1 [Source:RGD Symbol;Acc:1305105]	0	0	0	0	0	0.685245	0.0004378	-11.1574	down
GO:0035914	skeletal muscle cell differentiation	biological_process	6	0.000380384	ENSRNOG00000019422	Egr1	early growth response 1 [Source:RGD Symbol;Acc:2544]	28.8778	81.6766	49.115	5.6807	12.1778	9.44428	5.8481	2.54797	up
GO:0008395	steroid hydroxylase activity	molecular_function	6	0.000473237	ENSRNOG00000012458	Cyp2e1	cytochrome P450, family 2, subfamily e, polypeptide 1 [Source:RGD Symbol;Acc:2475]	1.59029	2.0422	0.503894	5.70974	4.74285	4.83838	0.270512	-1.88624	down
GO:0008395	steroid hydroxylase activity	molecular_function	6	0.000473237	ENSRNOG00000019500	Cyp1a1	cytochrome P450, family 1, subfamily a, polypeptide 1 [Source:RGD Symbol;Acc:2458]	3.79747	8.76837	3.6107	28.2685	25.6761	8.90865	0.25737	-1.95808	down
GO:0008395	steroid hydroxylase activity	molecular_function	6	0.000473237	ENSRNOG00000028891	Cyp2t1	cytochrome P450, family 2, subfamily t, polypeptide 1 [Source:RGD Symbol;Acc:620086]	2.88466	3.24066	2.34437	4.17459	4.32691	8.6706	0.493224	-1.01969	down
GO:0008395	steroid hydroxylase activity	molecular_function	6	0.000473237	ENSRNOG00000032261	Cyp2d4	cytochrome P450, family 2, subfamily d, polypeptide 4 [Source:RGD Symbol;Acc:620640]	3.90219	4.53709	2.88962	9.25606	7.48095	6.29301	0.491919	-1.02351	down
GO:0006082	organic acid metabolic process	biological_process	5	0.000473237	ENSRNOG00000003510	Fmo2	flavin containing dimethylaniline monoxygenase 2 [Source:RGD Symbol;Acc:628600]	36.2628	40.8993	13.9322	160.378	105.178	155.493	0.216351	-2.20855	down
GO:0006082	organic acid metabolic process	biological_process	5	0.000473237	ENSRNOG00000012458	Cyp2e1	cytochrome P450, family 2, subfamily e, polypeptide 1 [Source:RGD Symbol;Acc:2475]	1.59029	2.0422	0.503894	5.70974	4.74285	4.83838	0.270512	-1.88624	down
GO:0006082	organic acid metabolic process	biological_process	5	0.000473237	ENSRNOG00000028891	Cyp2t1	cytochrome P450, family 2, subfamily t, polypeptide 1 [Source:RGD Symbol;Acc:620086]	2.88466	3.24066	2.34437	4.17459	4.32691	8.6706	0.493224	-1.01969	down
GO:0006082	organic acid metabolic process	biological_process	5	0.000473237	ENSRNOG00000032261	Cyp2d4	cytochrome P450, family 2, subfamily d, polypeptide 4 [Source:RGD Symbol;Acc:620640]	3.90219	4.53709	2.88962	9.25606	7.48095	6.29301	0.491919	-1.02351	down
GO:0030141	secretory granule	cellular_component	8	0.000474819	ENSRNOG00000004649	Il1b	interleukin 1 beta [Source:RGD Symbol;Acc:2891]	17.0922	15.7097	15.266	6.22867	5.3594	4.98742	2.89994	1.53602	up
GO:0030141	secretory granule	cellular_component	8	0.000474819	ENSRNOG00000015055	Scg2	secretogranin II [Source:RGD Symbol;Acc:3626]	0.035057	0.056805	0.033008	0.243826	0.147987	2.48424	0.0434172	-4.52559	down
GO:0030141	secretory granule	cellular_component	8	0.000474819	ENSRNOG00000016945	Pla2g2a	phospholipase A2 group IIA [Source:RGD Symbol;Acc:620857]	430.776	142.041	305.208	31.8882	19.843	49.1573	8.70292	3.1215	up
GO:0030141	secretory granule	cellular_component	8	0.000474819	ENSRNOG00000019433	Rab3a	RAB3A, member RAS oncogene family [Source:RGD Symbol;Acc:3528]	5.25359	6.66674	3.95532	13.6283	11.8968	8.19245	0.470843	-1.08668	down
GO:0030141	secretory granule	cellular_component	8	0.000474819	ENSRNOG00000019587	Ptprn	protein tyrosine phosphatase, receptor type, N [Source:RGD Symbol;Acc:620777]	3.28822	1.58827	3.5683	0.404913	0.311202	1.36381	4.06013	2.02153	up
GO:0030141	secretory granule	cellular_component	8	0.000474819	ENSRNOG00000021269	Chgb	chromogranin B [Source:RGD Symbol;Acc:2339]	0	0	0	0.14414	0.032678	0.521372	0.000429682	-11.1844	down
GO:0030141	secretory granule	cellular_component	8	0.000474819	ENSRNOG00000045829	Thbs1	thrombospondin 1 [Source:RGD Symbol;Acc:1588455]	69.4641	106.372	164.303	44.915	55.3273	28.7153	2.6376	1.39923	up
GO:0001666	response to hypoxia	biological_process	5	0.000483577	ENSRNOG00000000167	Alas2	5'-aminolevulinate synthase 2 [Source:RGD Symbol;Acc:2084]	6.09555	7.97318	4.91833	9.86952	17.5757	19.2731	0.406416	-1.29897	down
GO:0001666	response to hypoxia	biological_process	5	0.000483577	ENSRNOG00000002331	Aldh3a1	aldehyde dehydrogenase 3 family, member A1 [Source:RGD Symbol;Acc:2088]	0.906245	1.33741	0.734843	1.81694	2.09876	14.0727	0.165579	-2.59441	down
GO:0001666	response to hypoxia	biological_process	5	0.000483577	ENSRNOG00000004473	Ppargc1a	PPARG coactivator 1 alpha [Source:RGD Symbol;Acc:620925]	0.699099	0.733841	0.380414	1.53806	1.6784	1.50382	0.384163	-1.38021	down
GO:0001666	response to hypoxia	biological_process	5	0.000483577	ENSRNOG00000007159	Ccl2	C-C motif chemokine ligand 2 [Source:RGD Symbol;Acc:3645]	37.7066	18.9936	41.8423	1.13671	3.71253	3.7896	11.4069	3.51183	up
GO:0001666	response to hypoxia	biological_process	5	0.000483577	ENSRNOG00000008176	Nppa	natriuretic peptide A [Source:RGD Symbol;Acc:3193]	0	0	0	0	0	4.77912	6.27731e-05	-13.9595	down
GO:0001666	response to hypoxia	biological_process	5	0.000483577	ENSRNOG00000014117	Hmox1	heme oxygenase 1 [Source:RGD Symbol;Acc:2806]	551.077	151.281	396.168	31.9406	70.2869	56.3487	6.92743	2.79232	up
GO:0001666	response to hypoxia	biological_process	5	0.000483577	ENSRNOG00000017060	Ryr2	ryanodine receptor 2 [Source:RGD Symbol;Acc:620314]	0.186399	0.211602	0.108926	0.285075	0.300051	1.47817	0.245687	-2.0251	down
GO:0001666	response to hypoxia	biological_process	5	0.000483577	ENSRNOG00000019048	Sod2	superoxide dismutase 2 [Source:RGD Symbol;Acc:3732]	144.337	78.5731	208.619	40.7461	61.5904	73.5054	2.45407	1.29518	up
GO:0001666	response to hypoxia	biological_process	5	0.000483577	ENSRNOG00000019422	Egr1	early growth response 1 [Source:RGD Symbol;Acc:2544]	28.8778	81.6766	49.115	5.6807	12.1778	9.44428	5.8481	2.54797	up
GO:0001666	response to hypoxia	biological_process	5	0.000483577	ENSRNOG00000019500	Cyp1a1	cytochrome P450, family 1, subfamily a, polypeptide 1 [Source:RGD Symbol;Acc:2458]	3.79747	8.76837	3.6107	28.2685	25.6761	8.90865	0.25737	-1.95808	down
GO:0031091	platelet alpha granule	cellular_component	9	0.000491449	ENSRNOG00000010529	Thbs2	thrombospondin 2 [Source:RGD Symbol;Acc:1310979]	16.9175	9.7328	15.9974	2.57939	6.01878	6.82916	2.76443	1.46698	up
GO:0031091	platelet alpha granule	cellular_component	9	0.000491449	ENSRNOG00000025074	Fgg	fibrinogen gamma chain [Source:RGD Symbol;Acc:2613]	127.794	78.6948	180.988	61.9913	70.073	37.5544	2.2844	1.19181	up
GO:0031091	platelet alpha granule	cellular_component	9	0.000491449	ENSRNOG00000045829	Thbs1	thrombospondin 1 [Source:RGD Symbol;Acc:1588455]	69.4641	106.372	164.303	44.915	55.3273	28.7153	2.6376	1.39923	up
GO:0002523	leukocyte migration involved in inflammatory response	biological_process	5	0.000491449	ENSRNOG00000007159	Ccl2	C-C motif chemokine ligand 2 [Source:RGD Symbol;Acc:3645]	37.7066	18.9936	41.8423	1.13671	3.71253	3.7896	11.4069	3.51183	up
GO:0002523	leukocyte migration involved in inflammatory response	biological_process	5	0.000491449	ENSRNOG00000011483	S100a9	S100 calcium binding protein A9 [Source:RGD Symbol;Acc:620267]	111.507	62.986	76.8319	20.221	25.7548	22.6237	3.66366	1.87329	up
GO:0002523	leukocyte migration involved in inflammatory response	biological_process	5	0.000491449	ENSRNOG00000011557	S100a8	S100 calcium binding protein A8 [Source:RGD Symbol;Acc:620265]	58.764	26.4357	40.8193	6.86219	14.8878	7.83776	4.25916	2.09057	up
GO:0004497	monooxygenase activity	molecular_function	5	0.000612303	ENSRNOG00000003510	Fmo2	flavin containing dimethylaniline monoxygenase 2 [Source:RGD Symbol;Acc:628600]	36.2628	40.8993	13.9322	160.378	105.178	155.493	0.216351	-2.20855	down
GO:0004497	monooxygenase activity	molecular_function	5	0.000612303	ENSRNOG00000003620	Fmo3	flavin containing dimethylaniline monoxygenase 3 [Source:RGD Symbol;Acc:619761]	5.58543	7.00354	2.57024	22.1896	18.4762	39.5247	0.18904	-2.40324	down
GO:0004497	monooxygenase activity	molecular_function	5	0.000612303	ENSRNOG00000012458	Cyp2e1	cytochrome P450, family 2, subfamily e, polypeptide 1 [Source:RGD Symbol;Acc:2475]	1.59029	2.0422	0.503894	5.70974	4.74285	4.83838	0.270512	-1.88624	down
GO:0004497	monooxygenase activity	molecular_function	5	0.000612303	ENSRNOG00000019500	Cyp1a1	cytochrome P450, family 1, subfamily a, polypeptide 1 [Source:RGD Symbol;Acc:2458]	3.79747	8.76837	3.6107	28.2685	25.6761	8.90865	0.25737	-1.95808	down
GO:0004497	monooxygenase activity	molecular_function	5	0.000612303	ENSRNOG00000028891	Cyp2t1	cytochrome P450, family 2, subfamily t, polypeptide 1 [Source:RGD Symbol;Acc:620086]	2.88466	3.24066	2.34437	4.17459	4.32691	8.6706	0.493224	-1.01969	down
GO:0004497	monooxygenase activity	molecular_function	5	0.000612303	ENSRNOG00000032261	Cyp2d4	cytochrome P450, family 2, subfamily d, polypeptide 4 [Source:RGD Symbol;Acc:620640]	3.90219	4.53709	2.88962	9.25606	7.48095	6.29301	0.491919	-1.02351	down
GO:0004497	monooxygenase activity	molecular_function	5	0.000612303	ENSRNOG00000049851	Fmo6	flavin containing monooxygenase 6 [Source:RGD Symbol;Acc:1559491]	0.023136	0.014864	0.04261	0.734681	0.198205	13.4635	0.00559931	-7.48054	down
GO:0034116	positive regulation of heterotypic cell-cell adhesion	biological_process	8	0.000648077	ENSRNOG00000004649	Il1b	interleukin 1 beta [Source:RGD Symbol;Acc:2891]	17.0922	15.7097	15.266	6.22867	5.3594	4.98742	2.89994	1.53602	up
GO:0034116	positive regulation of heterotypic cell-cell adhesion	biological_process	8	0.000648077	ENSRNOG00000019183	Alox15	arachidonate 15-lipoxygenase [Source:RGD Symbol;Acc:70493]	3.17012	1.75927	2.65063	3.59856	4.73835	17.0034	0.299129	-1.74116	down
GO:0034116	positive regulation of heterotypic cell-cell adhesion	biological_process	8	0.000648077	ENSRNOG00000025074	Fgg	fibrinogen gamma chain [Source:RGD Symbol;Acc:2613]	127.794	78.6948	180.988	61.9913	70.073	37.5544	2.2844	1.19181	up
GO:0042416	dopamine biosynthetic process	biological_process	10	0.000648077	ENSRNOG00000008656	Snca	synuclein alpha [Source:RGD Symbol;Acc:3729]	0.033831	0	0.067124	0.192924	0.624332	0.823897	0.0615147	-4.02293	down
GO:0042416	dopamine biosynthetic process	biological_process	10	0.000648077	ENSRNOG00000011039	Gch1	GTP cyclohydrolase 1 [Source:RGD Symbol;Acc:61992]	24.2456	21.4661	37.719	10.8419	15.8192	13.7037	2.06692	1.04748	up
GO:0042416	dopamine biosynthetic process	biological_process	10	0.000648077	ENSRNOG00000032261	Cyp2d4	cytochrome P450, family 2, subfamily d, polypeptide 4 [Source:RGD Symbol;Acc:620640]	3.90219	4.53709	2.88962	9.25606	7.48095	6.29301	0.491919	-1.02351	down
GO:0046483	heterocycle metabolic process	biological_process	5	0.000654714	ENSRNOG00000012458	Cyp2e1	cytochrome P450, family 2, subfamily e, polypeptide 1 [Source:RGD Symbol;Acc:2475]	1.59029	2.0422	0.503894	5.70974	4.74285	4.83838	0.270512	-1.88624	down
GO:0046483	heterocycle metabolic process	biological_process	5	0.000654714	ENSRNOG00000019500	Cyp1a1	cytochrome P450, family 1, subfamily a, polypeptide 1 [Source:RGD Symbol;Acc:2458]	3.79747	8.76837	3.6107	28.2685	25.6761	8.90865	0.25737	-1.95808	down
GO:0035662	Toll-like receptor 4 binding	molecular_function	7	0.000654714	ENSRNOG00000011483	S100a9	S100 calcium binding protein A9 [Source:RGD Symbol;Acc:620267]	111.507	62.986	76.8319	20.221	25.7548	22.6237	3.66366	1.87329	up
GO:0035662	Toll-like receptor 4 binding	molecular_function	7	0.000654714	ENSRNOG00000011557	S100a8	S100 calcium binding protein A8 [Source:RGD Symbol;Acc:620265]	58.764	26.4357	40.8193	6.86219	14.8878	7.83776	4.25916	2.09057	up
GO:0044729	hemi-methylated DNA-binding	molecular_function	8	0.000654714	ENSRNOG00000013074	Wt1	WT1 transcription factor [Source:RGD Symbol;Acc:3974]	6.51322	3.77358	7.11635	1.80892	3.61924	2.35499	2.236	1.16092	up
GO:0044729	hemi-methylated DNA-binding	molecular_function	8	0.000654714	ENSRNOG00000019422	Egr1	early growth response 1 [Source:RGD Symbol;Acc:2544]	28.8778	81.6766	49.115	5.6807	12.1778	9.44428	5.8481	2.54797	up
GO:0031092	platelet alpha granule membrane	cellular_component	8	0.000654714	ENSRNOG00000002794	Selp	selectin P [Source:RGD Symbol;Acc:3656]	3.596	2.43421	6.01392	0.725463	1.69202	1.63187	2.97434	1.57257	up
GO:0031092	platelet alpha granule membrane	cellular_component	8	0.000654714	ENSRNOG00000008656	Snca	synuclein alpha [Source:RGD Symbol;Acc:3729]	0.033831	0	0.067124	0.192924	0.624332	0.823897	0.0615147	-4.02293	down
GO:0045226	extracellular polysaccharide biosynthetic process	biological_process	9	0.000654714	ENSRNOG00000004854	Has2	hyaluronan synthase 2 [Source:RGD Symbol;Acc:2781]	0.632455	0.404069	0.485014	0.116629	0.11933	0.20685	3.4361	1.78077	up
GO:0045226	extracellular polysaccharide biosynthetic process	biological_process	9	0.000654714	ENSRNOG00000010994	Has1	hyaluronan synthase 1 [Source:RGD Symbol;Acc:708528]	2.04263	1.86301	4.06113	0.791237	1.41846	0.81575	2.63326	1.39685	up
GO:0009617	response to bacterium	biological_process	7	0.000734786	ENSRNOG00000003486	Mnda	myeloid cell nuclear differentiation antigen [Source:RGD Symbol;Acc:1306089]	26.8462	15.6126	28.5889	8.07711	6.61329	14.254	2.45463	1.2955	up
GO:0009617	response to bacterium	biological_process	7	0.000734786	ENSRNOG00000007159	Ccl2	C-C motif chemokine ligand 2 [Source:RGD Symbol;Acc:3645]	37.7066	18.9936	41.8423	1.13671	3.71253	3.7896	11.4069	3.51183	up
GO:0009617	response to bacterium	biological_process	7	0.000734786	ENSRNOG00000010278	Il6	interleukin 6 [Source:RGD Symbol;Acc:2901]	3.16485	2.11915	11.0231	0.105601	0.098662	0.045109	65.3927	6.03106	up
GO:0009617	response to bacterium	biological_process	7	0.000734786	ENSRNOG00000012458	Cyp2e1	cytochrome P450, family 2, subfamily e, polypeptide 1 [Source:RGD Symbol;Acc:2475]	1.59029	2.0422	0.503894	5.70974	4.74285	4.83838	0.270512	-1.88624	down
GO:0009617	response to bacterium	biological_process	7	0.000734786	ENSRNOG00000013973	Lcn2	lipocalin 2 [Source:RGD Symbol;Acc:69408]	1594.83	895.005	2315.86	399.193	738.611	424.407	3.07622	1.62116	up
GO:0009617	response to bacterium	biological_process	7	0.000734786	ENSRNOG00000022523	Fkbp5	FKBP prolyl isomerase 5 [Source:RGD Symbol;Acc:1309155]	10.6739	10.2676	11.1153	45.9607	15.4436	30.4565	0.348972	-1.51882	down
GO:0009617	response to bacterium	biological_process	7	0.000734786	ENSRNOG00000050251	MGC105649	hypothetical LOC302884 [Source:RGD Symbol;Acc:1359583]	15.189	14.4976	13.6708	5.70331	5.03997	9.70751	2.12009	1.08412	up
GO:0006094	gluconeogenesis	biological_process	9	0.000739612	ENSRNOG00000003745	Atf3	activating transcription factor 3 [Source:RGD Symbol;Acc:2165]	10.4013	37.4337	46.2986	3.78197	4.08518	7.17428	6.25829	2.64577	up
GO:0006094	gluconeogenesis	biological_process	9	0.000739612	ENSRNOG00000004473	Ppargc1a	PPARG coactivator 1 alpha [Source:RGD Symbol;Acc:620925]	0.699099	0.733841	0.380414	1.53806	1.6784	1.50382	0.384163	-1.38021	down
GO:0006094	gluconeogenesis	biological_process	9	0.000739612	ENSRNOG00000020254	Per2	period circadian regulator 2 [Source:RGD Symbol;Acc:61945]	5.08553	8.59563	7.97541	10.986	14.3571	23.4713	0.443651	-1.1725	down
GO:0006094	gluconeogenesis	biological_process	9	0.000739612	ENSRNOG00000056457	Gpd1	glycerol-3-phosphate dehydrogenase 1 [Source:RGD Symbol;Acc:621381]	11.7425	9.46065	12.8299	18.8796	16.7739	36.6629	0.470613	-1.08739	down
GO:0007565	female pregnancy	biological_process	5	0.000757143	ENSRNOG00000002302	Corin	corin, serine peptidase [Source:RGD Symbol;Acc:727887]	0.106521	0.316943	0.05572	0.485884	0.896918	1.82259	0.149493	-2.74185	down
GO:0007565	female pregnancy	biological_process	5	0.000757143	ENSRNOG00000008176	Nppa	natriuretic peptide A [Source:RGD Symbol;Acc:3193]	0	0	0	0	0	4.77912	6.27731e-05	-13.9595	down
GO:0007565	female pregnancy	biological_process	5	0.000757143	ENSRNOG00000013304	Arg1	arginase 1 [Source:RGD Symbol;Acc:2150]	38.2968	26.0177	49.9768	8.35733	12.4054	14.4375	3.24689	1.69906	up
GO:0007565	female pregnancy	biological_process	5	0.000757143	ENSRNOG00000013887	Adra2b	adrenoceptor alpha 2B [Source:RGD Symbol;Acc:2057]	0.323727	0.349478	0.234101	1.5404	0.988549	0.490279	0.300509	-1.73452	down
GO:0007565	female pregnancy	biological_process	5	0.000757143	ENSRNOG00000032261	Cyp2d4	cytochrome P450, family 2, subfamily d, polypeptide 4 [Source:RGD Symbol;Acc:620640]	3.90219	4.53709	2.88962	9.25606	7.48095	6.29301	0.491919	-1.02351	down
GO:0007565	female pregnancy	biological_process	5	0.000757143	ENSRNOG00000046667	Fosb	FosB proto-oncogene, AP-1 transcription factor subunit [Source:RGD Symbol;Acc:1308198]	4.40301	29.0803	28.1312	2.28038	1.38324	1.99461	10.8894	3.44485	up
GO:0014898	cardiac muscle hypertrophy in response to stress	biological_process	6	0.000833265	ENSRNOG00000008176	Nppa	natriuretic peptide A [Source:RGD Symbol;Acc:3193]	0	0	0	0	0	4.77912	6.27731e-05	-13.9595	down
GO:0014898	cardiac muscle hypertrophy in response to stress	biological_process	6	0.000833265	ENSRNOG00000016983	Myh7	myosin heavy chain 7 [Source:RGD Symbol;Acc:62030]	0	0.002143	0	0.00806	0.008274	5.03787	0.000424004	-11.2036	down
GO:0014898	cardiac muscle hypertrophy in response to stress	biological_process	6	0.000833265	ENSRNOG00000017808	Klf15	Kruppel-like factor 15 [Source:RGD Symbol;Acc:70918]	4.0834	7.67358	3.25876	24.0662	14.6325	13.7301	0.286403	-1.80388	down
GO:0097067	cellular response to thyroid hormone stimulus	biological_process	7	0.000833265	ENSRNOG00000004473	Ppargc1a	PPARG coactivator 1 alpha [Source:RGD Symbol;Acc:620925]	0.699099	0.733841	0.380414	1.53806	1.6784	1.50382	0.384163	-1.38021	down
GO:0097067	cellular response to thyroid hormone stimulus	biological_process	7	0.000833265	ENSRNOG00000014215	Klf9	Kruppel-like factor 9 [Source:RGD Symbol;Acc:70934]	11.9358	17.8583	12.2313	37.3234	29.1884	19.113	0.490808	-1.02677	down
GO:0097067	cellular response to thyroid hormone stimulus	biological_process	7	0.000833265	ENSRNOG00000020263	Atp1a3	ATPase Na+/K+ transporting subunit alpha 3 [Source:RGD Symbol;Acc:2169]	1.61757	1.90245	1.13016	0.671541	0.692308	0.956255	2.0043	1.0031	up
GO:0035094	response to nicotine	biological_process	6	0.000860145	ENSRNOG00000007290	Atp1a2	ATPase Na+/K+ transporting subunit alpha 2 [Source:RGD Symbol;Acc:2168]	1.11361	2.2107	0.439613	6.02731	3.2216	13.5037	0.165429	-2.59572	down
GO:0035094	response to nicotine	biological_process	6	0.000860145	ENSRNOG00000010210	Slc7a11	solute carrier family 7 member 11 [Source:RGD Symbol;Acc:1309275]	0.785658	0.686638	0.778759	0.116861	0.130128	0.355379	3.73701	1.90188	up
GO:0035094	response to nicotine	biological_process	6	0.000860145	ENSRNOG00000013521	Dhfr	dihydrofolate reductase [Source:RGD Symbol;Acc:2500]	4.22122	4.13326	5.03549	1.90962	1.4482	2.93528	2.12772	1.08931	up
GO:0035094	response to nicotine	biological_process	6	0.000860145	ENSRNOG00000014117	Hmox1	heme oxygenase 1 [Source:RGD Symbol;Acc:2806]	551.077	151.281	396.168	31.9406	70.2869	56.3487	6.92743	2.79232	up
GO:0035094	response to nicotine	biological_process	6	0.000860145	ENSRNOG00000028404	Ppp1r1b	protein phosphatase 1, regulatory (inhibitor) subunit 1B [Source:RGD Symbol;Acc:621859]	7.76903	6.02664	5.6708	22.4231	7.67647	15.2862	0.428911	-1.22125	down
GO:0050729	positive regulation of inflammatory response	biological_process	9	0.000860145	ENSRNOG00000001414	Serpine1	serpin family E member 1 [Source:RGD Symbol;Acc:3249]	55.409	67.7847	164.683	17.9559	19.5535	21.1919	4.90409	2.29399	up
GO:0050729	positive regulation of inflammatory response	biological_process	9	0.000860145	ENSRNOG00000004649	Il1b	interleukin 1 beta [Source:RGD Symbol;Acc:2891]	17.0922	15.7097	15.266	6.22867	5.3594	4.98742	2.89994	1.53602	up
GO:0050729	positive regulation of inflammatory response	biological_process	9	0.000860145	ENSRNOG00000008656	Snca	synuclein alpha [Source:RGD Symbol;Acc:3729]	0.033831	0	0.067124	0.192924	0.624332	0.823897	0.0615147	-4.02293	down
GO:0050729	positive regulation of inflammatory response	biological_process	9	0.000860145	ENSRNOG00000011483	S100a9	S100 calcium binding protein A9 [Source:RGD Symbol;Acc:620267]	111.507	62.986	76.8319	20.221	25.7548	22.6237	3.66366	1.87329	up
GO:0050729	positive regulation of inflammatory response	biological_process	9	0.000860145	ENSRNOG00000011557	S100a8	S100 calcium binding protein A8 [Source:RGD Symbol;Acc:620265]	58.764	26.4357	40.8193	6.86219	14.8878	7.83776	4.25916	2.09057	up
GO:0009612	response to mechanical stimulus	biological_process	5	0.000873758	ENSRNOG00000007159	Ccl2	C-C motif chemokine ligand 2 [Source:RGD Symbol;Acc:3645]	37.7066	18.9936	41.8423	1.13671	3.71253	3.7896	11.4069	3.51183	up
GO:0009612	response to mechanical stimulus	biological_process	5	0.000873758	ENSRNOG00000010278	Il6	interleukin 6 [Source:RGD Symbol;Acc:2901]	3.16485	2.11915	11.0231	0.105601	0.098662	0.045109	65.3927	6.03106	up
GO:0009612	response to mechanical stimulus	biological_process	5	0.000873758	ENSRNOG00000017786	Acta1	actin, alpha 1, skeletal muscle [Source:RGD Symbol;Acc:2025]	9.08505	7.68911	17.567	2.06127	3.95623	4.72239	3.19753	1.67696	up
GO:0009612	response to mechanical stimulus	biological_process	5	0.000873758	ENSRNOG00000045829	Thbs1	thrombospondin 1 [Source:RGD Symbol;Acc:1588455]	69.4641	106.372	164.303	44.915	55.3273	28.7153	2.6376	1.39923	up
GO:0009612	response to mechanical stimulus	biological_process	5	0.000873758	ENSRNOG00000046667	Fosb	FosB proto-oncogene, AP-1 transcription factor subunit [Source:RGD Symbol;Acc:1308198]	4.40301	29.0803	28.1312	2.28038	1.38324	1.99461	10.8894	3.44485	up
GO:0009612	response to mechanical stimulus	biological_process	5	0.000873758	ENSRNOG00000058645	Tnc	tenascin C [Source:RGD Symbol;Acc:621057]	32.8819	24.6221	38.6851	10.8562	17.6057	12.6766	2.33817	1.22538	up
GO:0010332	response to gamma radiation	biological_process	7	0.000967126	ENSRNOG00000000239	Ccl7	C-C motif chemokine ligand 7 [Source:RGD Symbol;Acc:1359152]	14.4232	11.1589	18.1968	0.371988	1.4184	3.33763	8.53719	3.09376	up
GO:0010332	response to gamma radiation	biological_process	7	0.000967126	ENSRNOG00000002792	Cxcl2	C-X-C motif chemokine ligand 2 [Source:RGD Symbol;Acc:70069]	2.67869	3.89774	3.91406	0.2245	0.858824	0.310974	7.52384	2.91147	up
GO:0010332	response to gamma radiation	biological_process	7	0.000967126	ENSRNOG00000007159	Ccl2	C-C motif chemokine ligand 2 [Source:RGD Symbol;Acc:3645]	37.7066	18.9936	41.8423	1.13671	3.71253	3.7896	11.4069	3.51183	up
GO:0010332	response to gamma radiation	biological_process	7	0.000967126	ENSRNOG00000019048	Sod2	superoxide dismutase 2 [Source:RGD Symbol;Acc:3732]	144.337	78.5731	208.619	40.7461	61.5904	73.5054	2.45407	1.29518	up
GO:0002687	positive regulation of leukocyte migration	biological_process	7	0.0010489	ENSRNOG00000002794	Selp	selectin P [Source:RGD Symbol;Acc:3656]	3.596	2.43421	6.01392	0.725463	1.69202	1.63187	2.97434	1.57257	up
GO:0002687	positive regulation of leukocyte migration	biological_process	7	0.0010489	ENSRNOG00000007159	Ccl2	C-C motif chemokine ligand 2 [Source:RGD Symbol;Acc:3645]	37.7066	18.9936	41.8423	1.13671	3.71253	3.7896	11.4069	3.51183	up
GO:0002687	positive regulation of leukocyte migration	biological_process	7	0.0010489	ENSRNOG00000029768	Ccl12	chemokine (C-C motif) ligand 12 [Source:RGD Symbol;Acc:1309255]	6.0007	2.47451	2.57848	0.194217	0.89901	0.367082	7.56941	2.92018	up
GO:0070374	positive regulation of ERK1 and ERK2 cascade	biological_process	12	0.00111304	ENSRNOG00000000239	Ccl7	C-C motif chemokine ligand 7 [Source:RGD Symbol;Acc:1359152]	14.4232	11.1589	18.1968	0.371988	1.4184	3.33763	8.53719	3.09376	up
GO:0070374	positive regulation of ERK1 and ERK2 cascade	biological_process	12	0.00111304	ENSRNOG00000007159	Ccl2	C-C motif chemokine ligand 2 [Source:RGD Symbol;Acc:3645]	37.7066	18.9936	41.8423	1.13671	3.71253	3.7896	11.4069	3.51183	up
GO:0070374	positive regulation of ERK1 and ERK2 cascade	biological_process	12	0.00111304	ENSRNOG00000010278	Il6	interleukin 6 [Source:RGD Symbol;Acc:2901]	3.16485	2.11915	11.0231	0.105601	0.098662	0.045109	65.3927	6.03106	up
GO:0070374	positive regulation of ERK1 and ERK2 cascade	biological_process	12	0.00111304	ENSRNOG00000016945	Pla2g2a	phospholipase A2 group IIA [Source:RGD Symbol;Acc:620857]	430.776	142.041	305.208	31.8882	19.843	49.1573	8.70292	3.1215	up
GO:0070374	positive regulation of ERK1 and ERK2 cascade	biological_process	12	0.00111304	ENSRNOG00000019183	Alox15	arachidonate 15-lipoxygenase [Source:RGD Symbol;Acc:70493]	3.17012	1.75927	2.65063	3.59856	4.73835	17.0034	0.299129	-1.74116	down
GO:0070374	positive regulation of ERK1 and ERK2 cascade	biological_process	12	0.00111304	ENSRNOG00000019622	Ackr3	atypical chemokine receptor 3 [Source:RGD Symbol;Acc:620601]	76.304	96.1834	133.552	44.5313	43.6139	45.7138	2.28628	1.193	up
GO:0070374	positive regulation of ERK1 and ERK2 cascade	biological_process	12	0.00111304	ENSRNOG00000025074	Fgg	fibrinogen gamma chain [Source:RGD Symbol;Acc:2613]	127.794	78.6948	180.988	61.9913	70.073	37.5544	2.2844	1.19181	up
GO:0070374	positive regulation of ERK1 and ERK2 cascade	biological_process	12	0.00111304	ENSRNOG00000029768	Ccl12	chemokine (C-C motif) ligand 12 [Source:RGD Symbol;Acc:1309255]	6.0007	2.47451	2.57848	0.194217	0.89901	0.367082	7.56941	2.92018	up
GO:0070374	positive regulation of ERK1 and ERK2 cascade	biological_process	12	0.00111304	ENSRNOG00000049303	Marco	macrophage receptor with collagenous structure [Source:RGD Symbol;Acc:1589662]	0.632275	0.603204	0.631253	0	0	0	6222.44	12.6033	up
GO:0070098	chemokine-mediated signaling pathway	biological_process	7	0.00122343	ENSRNOG00000000239	Ccl7	C-C motif chemokine ligand 7 [Source:RGD Symbol;Acc:1359152]	14.4232	11.1589	18.1968	0.371988	1.4184	3.33763	8.53719	3.09376	up
GO:0070098	chemokine-mediated signaling pathway	biological_process	7	0.00122343	ENSRNOG00000002792	Cxcl2	C-X-C motif chemokine ligand 2 [Source:RGD Symbol;Acc:70069]	2.67869	3.89774	3.91406	0.2245	0.858824	0.310974	7.52384	2.91147	up
GO:0070098	chemokine-mediated signaling pathway	biological_process	7	0.00122343	ENSRNOG00000007159	Ccl2	C-C motif chemokine ligand 2 [Source:RGD Symbol;Acc:3645]	37.7066	18.9936	41.8423	1.13671	3.71253	3.7896	11.4069	3.51183	up
GO:0070098	chemokine-mediated signaling pathway	biological_process	7	0.00122343	ENSRNOG00000019622	Ackr3	atypical chemokine receptor 3 [Source:RGD Symbol;Acc:620601]	76.304	96.1834	133.552	44.5313	43.6139	45.7138	2.28628	1.193	up
GO:0070098	chemokine-mediated signaling pathway	biological_process	7	0.00122343	ENSRNOG00000029768	Ccl12	chemokine (C-C motif) ligand 12 [Source:RGD Symbol;Acc:1309255]	6.0007	2.47451	2.57848	0.194217	0.89901	0.367082	7.56941	2.92018	up
GO:2000660	negative regulation of interleukin-1-mediated signaling pathway	biological_process	10	0.00129655	ENSRNOG00000005871	Il1rn	interleukin 1 receptor antagonist [Source:RGD Symbol;Acc:621159]	38.7998	25.085	37.5114	15.4297	14.5177	9.55624	2.56675	1.35995	up
GO:2000660	negative regulation of interleukin-1-mediated signaling pathway	biological_process	10	0.00129655	ENSRNOG00000010278	Il6	interleukin 6 [Source:RGD Symbol;Acc:2901]	3.16485	2.11915	11.0231	0.105601	0.098662	0.045109	65.3927	6.03106	up
GO:0008391	arachidonic acid monooxygenase activity	molecular_function	6	0.00129655	ENSRNOG00000019500	Cyp1a1	cytochrome P450, family 1, subfamily a, polypeptide 1 [Source:RGD Symbol;Acc:2458]	3.79747	8.76837	3.6107	28.2685	25.6761	8.90865	0.25737	-1.95808	down
GO:0008391	arachidonic acid monooxygenase activity	molecular_function	6	0.00129655	ENSRNOG00000032261	Cyp2d4	cytochrome P450, family 2, subfamily d, polypeptide 4 [Source:RGD Symbol;Acc:620640]	3.90219	4.53709	2.88962	9.25606	7.48095	6.29301	0.491919	-1.02351	down
GO:0042168	heme metabolic process	biological_process	8	0.00129655	ENSRNOG00000014117	Hmox1	heme oxygenase 1 [Source:RGD Symbol;Acc:2806]	551.077	151.281	396.168	31.9406	70.2869	56.3487	6.92743	2.79232	up
GO:0042168	heme metabolic process	biological_process	8	0.00129655	ENSRNOG00000018257	Hpx	hemopexin [Source:RGD Symbol;Acc:62040]	4.72321	3.68476	5.32204	2.45627	1.66849	2.5683	2.05138	1.03659	up
GO:0019829	ATPase-coupled cation transmembrane transporter activity	molecular_function	8	0.00129655	ENSRNOG00000007290	Atp1a2	ATPase Na+/K+ transporting subunit alpha 2 [Source:RGD Symbol;Acc:2168]	1.11361	2.2107	0.439613	6.02731	3.2216	13.5037	0.165429	-2.59572	down
GO:0019829	ATPase-coupled cation transmembrane transporter activity	molecular_function	8	0.00129655	ENSRNOG00000012878	Atp7b	ATPase copper transporting beta [Source:RGD Symbol;Acc:2180]	0.320325	0.146971	0.19402	0.561531	0.322591	3.50668	0.150614	-2.73107	down
GO:2000121	regulation of removal of superoxide radicals	biological_process	9	0.00129655	ENSRNOG00000011039	Gch1	GTP cyclohydrolase 1 [Source:RGD Symbol;Acc:61992]	24.2456	21.4661	37.719	10.8419	15.8192	13.7037	2.06692	1.04748	up
GO:2000121	regulation of removal of superoxide radicals	biological_process	9	0.00129655	ENSRNOG00000013521	Dhfr	dihydrofolate reductase [Source:RGD Symbol;Acc:2500]	4.22122	4.13326	5.03549	1.90962	1.4482	2.93528	2.12772	1.08931	up
GO:0050501	hyaluronan synthase activity	molecular_function	7	0.00129655	ENSRNOG00000004854	Has2	hyaluronan synthase 2 [Source:RGD Symbol;Acc:2781]	0.632455	0.404069	0.485014	0.116629	0.11933	0.20685	3.4361	1.78077	up
GO:0050501	hyaluronan synthase activity	molecular_function	7	0.00129655	ENSRNOG00000010994	Has1	hyaluronan synthase 1 [Source:RGD Symbol;Acc:708528]	2.04263	1.86301	4.06113	0.791237	1.41846	0.81575	2.63326	1.39685	up
GO:0007621	negative regulation of female receptivity	biological_process	8	0.00129655	ENSRNOG00000004400	Avpr1a	arginine vasopressin receptor 1A [Source:RGD Symbol;Acc:2185]	0.884247	0.991065	0.583946	1.63749	2.34024	1.80556	0.425235	-1.23367	down
GO:0007621	negative regulation of female receptivity	biological_process	8	0.00129655	ENSRNOG00000028404	Ppp1r1b	protein phosphatase 1, regulatory (inhibitor) subunit 1B [Source:RGD Symbol;Acc:621859]	7.76903	6.02664	5.6708	22.4231	7.67647	15.2862	0.428911	-1.22125	down
GO:0046654	tetrahydrofolate biosynthetic process	biological_process	8	0.00129655	ENSRNOG00000011039	Gch1	GTP cyclohydrolase 1 [Source:RGD Symbol;Acc:61992]	24.2456	21.4661	37.719	10.8419	15.8192	13.7037	2.06692	1.04748	up
GO:0046654	tetrahydrofolate biosynthetic process	biological_process	8	0.00129655	ENSRNOG00000013521	Dhfr	dihydrofolate reductase [Source:RGD Symbol;Acc:2500]	4.22122	4.13326	5.03549	1.90962	1.4482	2.93528	2.12772	1.08931	up
GO:0038165	oncostatin-M-mediated signaling pathway	biological_process	7	0.00129655	ENSRNOG00000024390	Osm	oncostatin M [Source:RGD Symbol;Acc:1585012]	2.84715	2.66279	2.36715	1.03466	0.790956	0.679723	3.14413	1.65266	up
GO:0038165	oncostatin-M-mediated signaling pathway	biological_process	7	0.00129655	ENSRNOG00000033192	Osmr	oncostatin M receptor [Source:RGD Symbol;Acc:1302983]	11.718	9.37308	19.7537	4.6298	7.5865	6.30735	2.20501	1.14079	up
GO:0042904	9-cis-retinoic acid biosynthetic process	biological_process	12	0.00129655	ENSRNOG00000019500	Cyp1a1	cytochrome P450, family 1, subfamily a, polypeptide 1 [Source:RGD Symbol;Acc:2458]	3.79747	8.76837	3.6107	28.2685	25.6761	8.90865	0.25737	-1.95808	down
GO:0042904	9-cis-retinoic acid biosynthetic process	biological_process	12	0.00129655	ENSRNOG00000058568	Dhrs9	dehydrogenase/reductase 9 [Source:RGD Symbol;Acc:620655]	9.49096	6.67188	18.1665	1.17878	2.82958	3.45117	4.60207	2.20228	up
GO:0010385	double-stranded methylated DNA binding	molecular_function	8	0.00129655	ENSRNOG00000013074	Wt1	WT1 transcription factor [Source:RGD Symbol;Acc:3974]	6.51322	3.77358	7.11635	1.80892	3.61924	2.35499	2.236	1.16092	up
GO:0010385	double-stranded methylated DNA binding	molecular_function	8	0.00129655	ENSRNOG00000019422	Egr1	early growth response 1 [Source:RGD Symbol;Acc:2544]	28.8778	81.6766	49.115	5.6807	12.1778	9.44428	5.8481	2.54797	up
GO:0060708	spongiotrophoblast differentiation	biological_process	6	0.00129655	ENSRNOG00000002946	Socs3	suppressor of cytokine signaling 3 [Source:RGD Symbol;Acc:621087]	50.4008	65.1614	87.6908	40.5991	23.2455	16.4051	2.53276	1.34071	up
GO:0060708	spongiotrophoblast differentiation	biological_process	6	0.00129655	ENSRNOG00000007002	Lif	LIF, interleukin 6 family cytokine [Source:RGD Symbol;Acc:620865]	2.79472	2.7336	5.46239	0.880568	1.01865	1.04408	3.73414	1.90078	up
GO:0050901	leukocyte tethering or rolling	biological_process	8	0.00129677	ENSRNOG00000002723	Sele	selectin E [Source:RGD Symbol;Acc:3654]	2.98187	1.19921	3.6168	0.148222	0.414433	0.461137	7.61667	2.92916	up
GO:0050901	leukocyte tethering or rolling	biological_process	8	0.00129677	ENSRNOG00000002794	Selp	selectin P [Source:RGD Symbol;Acc:3656]	3.596	2.43421	6.01392	0.725463	1.69202	1.63187	2.97434	1.57257	up
GO:0050901	leukocyte tethering or rolling	biological_process	8	0.00129677	ENSRNOG00000015903	Add2	adducin 2 [Source:RGD Symbol;Acc:2042]	0.471254	0.687281	0.447776	1.00894	1.70809	1.63371	0.369205	-1.43751	down
GO:0070330	aromatase activity	molecular_function	7	0.00129677	ENSRNOG00000012458	Cyp2e1	cytochrome P450, family 2, subfamily e, polypeptide 1 [Source:RGD Symbol;Acc:2475]	1.59029	2.0422	0.503894	5.70974	4.74285	4.83838	0.270512	-1.88624	down
GO:0070330	aromatase activity	molecular_function	7	0.00129677	ENSRNOG00000019500	Cyp1a1	cytochrome P450, family 1, subfamily a, polypeptide 1 [Source:RGD Symbol;Acc:2458]	3.79747	8.76837	3.6107	28.2685	25.6761	8.90865	0.25737	-1.95808	down
GO:0070330	aromatase activity	molecular_function	7	0.00129677	ENSRNOG00000032261	Cyp2d4	cytochrome P450, family 2, subfamily d, polypeptide 4 [Source:RGD Symbol;Acc:620640]	3.90219	4.53709	2.88962	9.25606	7.48095	6.29301	0.491919	-1.02351	down
GO:0055114	oxidation-reduction process	biological_process	4	0.0015275	ENSRNOG00000000158	Cdo1	cysteine dioxygenase type 1 [Source:RGD Symbol;Acc:69262]	13.6117	16.2309	8.62663	48.0212	33.1986	69.6373	0.255005	-1.9714	down
GO:0055114	oxidation-reduction process	biological_process	4	0.0015275	ENSRNOG00000002331	Aldh3a1	aldehyde dehydrogenase 3 family, member A1 [Source:RGD Symbol;Acc:2088]	0.906245	1.33741	0.734843	1.81694	2.09876	14.0727	0.165579	-2.59441	down
GO:0055114	oxidation-reduction process	biological_process	4	0.0015275	ENSRNOG00000003510	Fmo2	flavin containing dimethylaniline monoxygenase 2 [Source:RGD Symbol;Acc:628600]	36.2628	40.8993	13.9322	160.378	105.178	155.493	0.216351	-2.20855	down
GO:0055114	oxidation-reduction process	biological_process	4	0.0015275	ENSRNOG00000003620	Fmo3	flavin containing dimethylaniline monoxygenase 3 [Source:RGD Symbol;Acc:619761]	5.58543	7.00354	2.57024	22.1896	18.4762	39.5247	0.18904	-2.40324	down
GO:0055114	oxidation-reduction process	biological_process	4	0.0015275	ENSRNOG00000007069	Adhfe1	alcohol dehydrogenase, iron containing, 1 [Source:RGD Symbol;Acc:1308863]	1.33406	1.55771	0.55276	4.76899	1.84642	4.43534	0.311701	-1.68176	down
GO:0055114	oxidation-reduction process	biological_process	4	0.0015275	ENSRNOG00000008586	Aldh1l2	aldehyde dehydrogenase 1 family, member L2 [Source:RGD Symbol;Acc:1309458]	1.58045	0.639397	1.11351	0.097725	0.378507	0.428929	3.68262	1.88073	up
GO:0055114	oxidation-reduction process	biological_process	4	0.0015275	ENSRNOG00000008656	Snca	synuclein alpha [Source:RGD Symbol;Acc:3729]	0.033831	0	0.067124	0.192924	0.624332	0.823897	0.0615147	-4.02293	down
GO:0055114	oxidation-reduction process	biological_process	4	0.0015275	ENSRNOG00000012436	Adh6	alcohol dehydrogenase 1 (class I) [Source:RGD Symbol;Acc:2044]	3.44215	4.16162	1.57908	6.77746	7.28181	9.62364	0.387742	-1.36683	down
GO:0055114	oxidation-reduction process	biological_process	4	0.0015275	ENSRNOG00000012458	Cyp2e1	cytochrome P450, family 2, subfamily e, polypeptide 1 [Source:RGD Symbol;Acc:2475]	1.59029	2.0422	0.503894	5.70974	4.74285	4.83838	0.270512	-1.88624	down
GO:0055114	oxidation-reduction process	biological_process	4	0.0015275	ENSRNOG00000013521	Dhfr	dihydrofolate reductase [Source:RGD Symbol;Acc:2500]	4.22122	4.13326	5.03549	1.90962	1.4482	2.93528	2.12772	1.08931	up
GO:0055114	oxidation-reduction process	biological_process	4	0.0015275	ENSRNOG00000014117	Hmox1	heme oxygenase 1 [Source:RGD Symbol;Acc:2806]	551.077	151.281	396.168	31.9406	70.2869	56.3487	6.92743	2.79232	up
GO:0055114	oxidation-reduction process	biological_process	4	0.0015275	ENSRNOG00000019048	Sod2	superoxide dismutase 2 [Source:RGD Symbol;Acc:3732]	144.337	78.5731	208.619	40.7461	61.5904	73.5054	2.45407	1.29518	up
GO:0055114	oxidation-reduction process	biological_process	4	0.0015275	ENSRNOG00000019183	Alox15	arachidonate 15-lipoxygenase [Source:RGD Symbol;Acc:70493]	3.17012	1.75927	2.65063	3.59856	4.73835	17.0034	0.299129	-1.74116	down
GO:0055114	oxidation-reduction process	biological_process	4	0.0015275	ENSRNOG00000019500	Cyp1a1	cytochrome P450, family 1, subfamily a, polypeptide 1 [Source:RGD Symbol;Acc:2458]	3.79747	8.76837	3.6107	28.2685	25.6761	8.90865	0.25737	-1.95808	down
GO:0055114	oxidation-reduction process	biological_process	4	0.0015275	ENSRNOG00000028891	Cyp2t1	cytochrome P450, family 2, subfamily t, polypeptide 1 [Source:RGD Symbol;Acc:620086]	2.88466	3.24066	2.34437	4.17459	4.32691	8.6706	0.493224	-1.01969	down
GO:0055114	oxidation-reduction process	biological_process	4	0.0015275	ENSRNOG00000032261	Cyp2d4	cytochrome P450, family 2, subfamily d, polypeptide 4 [Source:RGD Symbol;Acc:620640]	3.90219	4.53709	2.88962	9.25606	7.48095	6.29301	0.491919	-1.02351	down
GO:0055114	oxidation-reduction process	biological_process	4	0.0015275	ENSRNOG00000038319	Akr1c19	aldo-keto reductase family 1, member C19 [Source:RGD Symbol;Acc:1562954]	4.58014	5.43589	2.94887	7.99767	9.39868	9.74826	0.477623	-1.06605	down
GO:0055114	oxidation-reduction process	biological_process	4	0.0015275	ENSRNOG00000049851	Fmo6	flavin containing monooxygenase 6 [Source:RGD Symbol;Acc:1559491]	0.023136	0.014864	0.04261	0.734681	0.198205	13.4635	0.00559931	-7.48054	down
GO:0055114	oxidation-reduction process	biological_process	4	0.0015275	ENSRNOG00000056457	Gpd1	glycerol-3-phosphate dehydrogenase 1 [Source:RGD Symbol;Acc:621381]	11.7425	9.46065	12.8299	18.8796	16.7739	36.6629	0.470613	-1.08739	down
GO:0055114	oxidation-reduction process	biological_process	4	0.0015275	ENSRNOG00000058568	Dhrs9	dehydrogenase/reductase 9 [Source:RGD Symbol;Acc:620655]	9.49096	6.67188	18.1665	1.17878	2.82958	3.45117	4.60207	2.20228	up
GO:0055114	oxidation-reduction process	biological_process	4	0.0015275	ENSRNOG00000062125	Aox3	aldehyde oxidase 3 [Source:RGD Symbol;Acc:1359328]	0.87407	1.02473	0.56828	1.87058	1.06784	3.69308	0.372024	-1.42653	down
GO:0007596	blood coagulation	biological_process	7	0.00156234	ENSRNOG00000010513	Tfpi2	tissue factor pathway inhibitor 2 [Source:RGD Symbol;Acc:628629]	2.00105	1.77887	4.74033	0.303871	0.748737	1.02747	4.09613	2.03426	up
GO:0007596	blood coagulation	biological_process	7	0.00156234	ENSRNOG00000011068	Papss2	3'-phosphoadenosine 5'-phosphosulfate synthase 2 [Source:RGD Symbol;Acc:1307012]	1.26168	1.73621	0.852359	2.5901	1.95362	4.37942	0.43149	-1.2126	down
GO:0007596	blood coagulation	biological_process	7	0.00156234	ENSRNOG00000011800	F3	coagulation factor III, tissue factor [Source:RGD Symbol;Acc:2587]	167.292	169.907	352.923	78.9706	86.6779	136.29	2.28564	1.1926	up
GO:0007596	blood coagulation	biological_process	7	0.00156234	ENSRNOG00000020951	Slc4a1	solute carrier family 4 member 1 (Diego blood group) [Source:RGD Symbol;Acc:3710]	0.638523	0.746664	0.545707	1.90142	2.54942	4.14042	0.224751	-2.1536	down
GO:0007596	blood coagulation	biological_process	7	0.00156234	ENSRNOG00000025074	Fgg	fibrinogen gamma chain [Source:RGD Symbol;Acc:2613]	127.794	78.6948	180.988	61.9913	70.073	37.5544	2.2844	1.19181	up
GO:0071354	cellular response to interleukin-6	biological_process	8	0.00157857	ENSRNOG00000004473	Ppargc1a	PPARG coactivator 1 alpha [Source:RGD Symbol;Acc:620925]	0.699099	0.733841	0.380414	1.53806	1.6784	1.50382	0.384163	-1.38021	down
GO:0071354	cellular response to interleukin-6	biological_process	8	0.00157857	ENSRNOG00000007159	Ccl2	C-C motif chemokine ligand 2 [Source:RGD Symbol;Acc:3645]	37.7066	18.9936	41.8423	1.13671	3.71253	3.7896	11.4069	3.51183	up
GO:0071354	cellular response to interleukin-6	biological_process	8	0.00157857	ENSRNOG00000025074	Fgg	fibrinogen gamma chain [Source:RGD Symbol;Acc:2613]	127.794	78.6948	180.988	61.9913	70.073	37.5544	2.2844	1.19181	up
GO:0048020	CCR chemokine receptor binding	molecular_function	8	0.00157857	ENSRNOG00000000239	Ccl7	C-C motif chemokine ligand 7 [Source:RGD Symbol;Acc:1359152]	14.4232	11.1589	18.1968	0.371988	1.4184	3.33763	8.53719	3.09376	up
GO:0048020	CCR chemokine receptor binding	molecular_function	8	0.00157857	ENSRNOG00000007159	Ccl2	C-C motif chemokine ligand 2 [Source:RGD Symbol;Acc:3645]	37.7066	18.9936	41.8423	1.13671	3.71253	3.7896	11.4069	3.51183	up
GO:0048020	CCR chemokine receptor binding	molecular_function	8	0.00157857	ENSRNOG00000029768	Ccl12	chemokine (C-C motif) ligand 12 [Source:RGD Symbol;Acc:1309255]	6.0007	2.47451	2.57848	0.194217	0.89901	0.367082	7.56941	2.92018	up
GO:0000302	response to reactive oxygen species	biological_process	6	0.00157857	ENSRNOG00000004473	Ppargc1a	PPARG coactivator 1 alpha [Source:RGD Symbol;Acc:620925]	0.699099	0.733841	0.380414	1.53806	1.6784	1.50382	0.384163	-1.38021	down
GO:0000302	response to reactive oxygen species	biological_process	6	0.00157857	ENSRNOG00000019048	Sod2	superoxide dismutase 2 [Source:RGD Symbol;Acc:3732]	144.337	78.5731	208.619	40.7461	61.5904	73.5054	2.45407	1.29518	up
GO:0000302	response to reactive oxygen species	biological_process	6	0.00157857	ENSRNOG00000019587	Ptprn	protein tyrosine phosphatase, receptor type, N [Source:RGD Symbol;Acc:620777]	3.28822	1.58827	3.5683	0.404913	0.311202	1.36381	4.06013	2.02153	up
GO:0090026	positive regulation of monocyte chemotaxis	biological_process	9	0.00157857	ENSRNOG00000001414	Serpine1	serpin family E member 1 [Source:RGD Symbol;Acc:3249]	55.409	67.7847	164.683	17.9559	19.5535	21.1919	4.90409	2.29399	up
GO:0090026	positive regulation of monocyte chemotaxis	biological_process	9	0.00157857	ENSRNOG00000007159	Ccl2	C-C motif chemokine ligand 2 [Source:RGD Symbol;Acc:3645]	37.7066	18.9936	41.8423	1.13671	3.71253	3.7896	11.4069	3.51183	up
GO:0090026	positive regulation of monocyte chemotaxis	biological_process	9	0.00157857	ENSRNOG00000025691	Pla2g7	phospholipase A2 group VII [Source:RGD Symbol;Acc:1310734]	10.9129	7.49608	7.40635	1.91299	2.90558	5.81907	2.42679	1.27905	up
GO:0043679	axon terminus	cellular_component	6	0.00168929	ENSRNOG00000007159	Ccl2	C-C motif chemokine ligand 2 [Source:RGD Symbol;Acc:3645]	37.7066	18.9936	41.8423	1.13671	3.71253	3.7896	11.4069	3.51183	up
GO:0043679	axon terminus	cellular_component	6	0.00168929	ENSRNOG00000008656	Snca	synuclein alpha [Source:RGD Symbol;Acc:3729]	0.033831	0	0.067124	0.192924	0.624332	0.823897	0.0615147	-4.02293	down
GO:0043679	axon terminus	cellular_component	6	0.00168929	ENSRNOG00000018827	LOC103694905	5-hydroxytryptamine receptor 7 [Source:RGD Symbol;Acc:9265298]	0.601136	0.302224	0.67299	0.0940072	0.184716	0.168906	3.52156	1.81621	up
GO:0043679	axon terminus	cellular_component	6	0.00168929	ENSRNOG00000018839	Ntrk2	neurotrophic receptor tyrosine kinase 2 [Source:RGD Symbol;Acc:3213]	2.74908	5.01041	5.1754	1.89725	0.712652	1.98932	2.81241	1.49181	up
GO:0043679	axon terminus	cellular_component	6	0.00168929	ENSRNOG00000019587	Ptprn	protein tyrosine phosphatase, receptor type, N [Source:RGD Symbol;Acc:620777]	3.28822	1.58827	3.5683	0.404913	0.311202	1.36381	4.06013	2.02153	up
GO:0045429	positive regulation of nitric oxide biosynthetic process	biological_process	9	0.00174333	ENSRNOG00000004649	Il1b	interleukin 1 beta [Source:RGD Symbol;Acc:2891]	17.0922	15.7097	15.266	6.22867	5.3594	4.98742	2.89994	1.53602	up
GO:0045429	positive regulation of nitric oxide biosynthetic process	biological_process	9	0.00174333	ENSRNOG00000010278	Il6	interleukin 6 [Source:RGD Symbol;Acc:2901]	3.16485	2.11915	11.0231	0.105601	0.098662	0.045109	65.3927	6.03106	up
GO:0045429	positive regulation of nitric oxide biosynthetic process	biological_process	9	0.00174333	ENSRNOG00000019048	Sod2	superoxide dismutase 2 [Source:RGD Symbol;Acc:3732]	144.337	78.5731	208.619	40.7461	61.5904	73.5054	2.45407	1.29518	up
GO:0045429	positive regulation of nitric oxide biosynthetic process	biological_process	9	0.00174333	ENSRNOG00000022067	Tlr5	toll-like receptor 5 [Source:RGD Symbol;Acc:631351]	1.22779	1.25646	1.08737	3.79088	2.48157	3.94515	0.349555	-1.51641	down
GO:0045766	positive regulation of angiogenesis	biological_process	8	0.00175159	ENSRNOG00000001414	Serpine1	serpin family E member 1 [Source:RGD Symbol;Acc:3249]	55.409	67.7847	164.683	17.9559	19.5535	21.1919	4.90409	2.29399	up
GO:0045766	positive regulation of angiogenesis	biological_process	8	0.00175159	ENSRNOG00000002771	Ereg	epiregulin [Source:RGD Symbol;Acc:620299]	3.53527	6.81166	10.5663	1.17724	1.04308	1.27508	5.98307	2.58089	up
GO:0045766	positive regulation of angiogenesis	biological_process	8	0.00175159	ENSRNOG00000004649	Il1b	interleukin 1 beta [Source:RGD Symbol;Acc:2891]	17.0922	15.7097	15.266	6.22867	5.3594	4.98742	2.89994	1.53602	up
GO:0045766	positive regulation of angiogenesis	biological_process	8	0.00175159	ENSRNOG00000006569	Itgb8	integrin subunit beta 8 [Source:RGD Symbol;Acc:1311374]	2.69064	1.81036	3.42008	0.970632	0.984076	0.573387	3.13322	1.64765	up
GO:0045766	positive regulation of angiogenesis	biological_process	8	0.00175159	ENSRNOG00000011800	F3	coagulation factor III, tissue factor [Source:RGD Symbol;Acc:2587]	167.292	169.907	352.923	78.9706	86.6779	136.29	2.28564	1.1926	up
GO:0045766	positive regulation of angiogenesis	biological_process	8	0.00175159	ENSRNOG00000014117	Hmox1	heme oxygenase 1 [Source:RGD Symbol;Acc:2806]	551.077	151.281	396.168	31.9406	70.2869	56.3487	6.92743	2.79232	up
GO:0045766	positive regulation of angiogenesis	biological_process	8	0.00175159	ENSRNOG00000045829	Thbs1	thrombospondin 1 [Source:RGD Symbol;Acc:1588455]	69.4641	106.372	164.303	44.915	55.3273	28.7153	2.6376	1.39923	up
GO:0019229	regulation of vasoconstriction	biological_process	9	0.00189589	ENSRNOG00000007290	Atp1a2	ATPase Na+/K+ transporting subunit alpha 2 [Source:RGD Symbol;Acc:2168]	1.11361	2.2107	0.439613	6.02731	3.2216	13.5037	0.165429	-2.59572	down
GO:0019229	regulation of vasoconstriction	biological_process	9	0.00189589	ENSRNOG00000013887	Adra2b	adrenoceptor alpha 2B [Source:RGD Symbol;Acc:2057]	0.323727	0.349478	0.234101	1.5404	0.988549	0.490279	0.300509	-1.73452	down
GO:0019229	regulation of vasoconstriction	biological_process	9	0.00189589	ENSRNOG00000020254	Per2	period circadian regulator 2 [Source:RGD Symbol;Acc:61945]	5.08553	8.59563	7.97541	10.986	14.3571	23.4713	0.443651	-1.1725	down
GO:0030017	sarcomere	cellular_component	5	0.00193859	ENSRNOG00000005555	Lrrc10	leucine-rich repeat-containing protein 10-like [Source:RGD Symbol;Acc:6495036]	0	0	0	0	0	3.58154	8.37629e-05	-13.5433	down
GO:0030017	sarcomere	cellular_component	5	0.00193859	ENSRNOG00000017060	Ryr2	ryanodine receptor 2 [Source:RGD Symbol;Acc:620314]	0.186399	0.211602	0.108926	0.285075	0.300051	1.47817	0.245687	-2.0251	down
GO:0030017	sarcomere	cellular_component	5	0.00193859	ENSRNOG00000017786	Acta1	actin, alpha 1, skeletal muscle [Source:RGD Symbol;Acc:2025]	9.08505	7.68911	17.567	2.06127	3.95623	4.72239	3.19753	1.67696	up
GO:0030017	sarcomere	cellular_component	5	0.00193859	ENSRNOG00000049607	LOC100911101	leucine-rich repeat-containing 10 [Source:RGD Symbol;Acc:1307358]	0	0	0	0	0	4.63893	6.46701e-05	-13.9165	down
GO:0016712	oxidoreductase activity, acting on paired donors, with incorporation or reduction of molecular oxygen, reduced flavin or flavoprotein as one donor, and incorporation of one atom of oxygen	molecular_function	6	0.00193859	ENSRNOG00000012458	Cyp2e1	cytochrome P450, family 2, subfamily e, polypeptide 1 [Source:RGD Symbol;Acc:2475]	1.59029	2.0422	0.503894	5.70974	4.74285	4.83838	0.270512	-1.88624	down
GO:0016712	oxidoreductase activity, acting on paired donors, with incorporation or reduction of molecular oxygen, reduced flavin or flavoprotein as one donor, and incorporation of one atom of oxygen	molecular_function	6	0.00193859	ENSRNOG00000019500	Cyp1a1	cytochrome P450, family 1, subfamily a, polypeptide 1 [Source:RGD Symbol;Acc:2458]	3.79747	8.76837	3.6107	28.2685	25.6761	8.90865	0.25737	-1.95808	down
GO:0016712	oxidoreductase activity, acting on paired donors, with incorporation or reduction of molecular oxygen, reduced flavin or flavoprotein as one donor, and incorporation of one atom of oxygen	molecular_function	6	0.00193859	ENSRNOG00000028891	Cyp2t1	cytochrome P450, family 2, subfamily t, polypeptide 1 [Source:RGD Symbol;Acc:620086]	2.88466	3.24066	2.34437	4.17459	4.32691	8.6706	0.493224	-1.01969	down
GO:0016712	oxidoreductase activity, acting on paired donors, with incorporation or reduction of molecular oxygen, reduced flavin or flavoprotein as one donor, and incorporation of one atom of oxygen	molecular_function	6	0.00193859	ENSRNOG00000032261	Cyp2d4	cytochrome P450, family 2, subfamily d, polypeptide 4 [Source:RGD Symbol;Acc:620640]	3.90219	4.53709	2.88962	9.25606	7.48095	6.29301	0.491919	-1.02351	down
GO:0009611	response to wounding	biological_process	5	0.00196565	ENSRNOG00000007159	Ccl2	C-C motif chemokine ligand 2 [Source:RGD Symbol;Acc:3645]	37.7066	18.9936	41.8423	1.13671	3.71253	3.7896	11.4069	3.51183	up
GO:0009611	response to wounding	biological_process	5	0.00196565	ENSRNOG00000010278	Il6	interleukin 6 [Source:RGD Symbol;Acc:2901]	3.16485	2.11915	11.0231	0.105601	0.098662	0.045109	65.3927	6.03106	up
GO:0009611	response to wounding	biological_process	5	0.00196565	ENSRNOG00000013304	Arg1	arginase 1 [Source:RGD Symbol;Acc:2150]	38.2968	26.0177	49.9768	8.35733	12.4054	14.4375	3.24689	1.69906	up
GO:0009611	response to wounding	biological_process	5	0.00196565	ENSRNOG00000019500	Cyp1a1	cytochrome P450, family 1, subfamily a, polypeptide 1 [Source:RGD Symbol;Acc:2458]	3.79747	8.76837	3.6107	28.2685	25.6761	8.90865	0.25737	-1.95808	down
GO:0009611	response to wounding	biological_process	5	0.00196565	ENSRNOG00000058645	Tnc	tenascin C [Source:RGD Symbol;Acc:621057]	32.8819	24.6221	38.6851	10.8562	17.6057	12.6766	2.33817	1.22538	up
GO:0008430	selenium binding	molecular_function	4	0.0021397	ENSRNOG00000047158	Selenbp1	selenium binding protein 1 [Source:RGD Symbol;Acc:620571]	23.0165	27.0568	18.3583	36.9468	36.4196	68.3416	0.482905	-1.05019	down
GO:0008430	selenium binding	molecular_function	4	0.0021397	ENSRNOG00000053812	LOC103689947	selenium-binding protein 1 [Source:RGD Symbol;Acc:9292945]	28.5984	24.2541	16.2324	45.6936	32.7812	89.7162	0.410752	-1.28366	down
GO:0042541	hemoglobin biosynthetic process	biological_process	8	0.0021397	ENSRNOG00000000167	Alas2	5'-aminolevulinate synthase 2 [Source:RGD Symbol;Acc:2084]	6.09555	7.97318	4.91833	9.86952	17.5757	19.2731	0.406416	-1.29897	down
GO:0042541	hemoglobin biosynthetic process	biological_process	8	0.0021397	ENSRNOG00000014320	Inhba	inhibin subunit beta A [Source:RGD Symbol;Acc:62074]	1.43305	0.871656	0.743097	0.137745	0.416838	0.219709	3.93625	1.97682	up
GO:0051918	negative regulation of fibrinolysis	biological_process	9	0.0021397	ENSRNOG00000001414	Serpine1	serpin family E member 1 [Source:RGD Symbol;Acc:3249]	55.409	67.7847	164.683	17.9559	19.5535	21.1919	4.90409	2.29399	up
GO:0051918	negative regulation of fibrinolysis	biological_process	9	0.0021397	ENSRNOG00000045829	Thbs1	thrombospondin 1 [Source:RGD Symbol;Acc:1588455]	69.4641	106.372	164.303	44.915	55.3273	28.7153	2.6376	1.39923	up
GO:0006778	porphyrin-containing compound metabolic process	biological_process	7	0.0021397	ENSRNOG00000000167	Alas2	5'-aminolevulinate synthase 2 [Source:RGD Symbol;Acc:2084]	6.09555	7.97318	4.91833	9.86952	17.5757	19.2731	0.406416	-1.29897	down
GO:0006778	porphyrin-containing compound metabolic process	biological_process	7	0.0021397	ENSRNOG00000019500	Cyp1a1	cytochrome P450, family 1, subfamily a, polypeptide 1 [Source:RGD Symbol;Acc:2458]	3.79747	8.76837	3.6107	28.2685	25.6761	8.90865	0.25737	-1.95808	down
GO:0033691	sialic acid binding	molecular_function	7	0.0021397	ENSRNOG00000002723	Sele	selectin E [Source:RGD Symbol;Acc:3654]	2.98187	1.19921	3.6168	0.148222	0.414433	0.461137	7.61667	2.92916	up
GO:0033691	sialic acid binding	molecular_function	7	0.0021397	ENSRNOG00000002794	Selp	selectin P [Source:RGD Symbol;Acc:3656]	3.596	2.43421	6.01392	0.725463	1.69202	1.63187	2.97434	1.57257	up
GO:0043200	response to amino acid	biological_process	6	0.00214847	ENSRNOG00000000158	Cdo1	cysteine dioxygenase type 1 [Source:RGD Symbol;Acc:69262]	13.6117	16.2309	8.62663	48.0212	33.1986	69.6373	0.255005	-1.9714	down
GO:0043200	response to amino acid	biological_process	6	0.00214847	ENSRNOG00000007159	Ccl2	C-C motif chemokine ligand 2 [Source:RGD Symbol;Acc:3645]	37.7066	18.9936	41.8423	1.13671	3.71253	3.7896	11.4069	3.51183	up
GO:0043200	response to amino acid	biological_process	6	0.00214847	ENSRNOG00000010278	Il6	interleukin 6 [Source:RGD Symbol;Acc:2901]	3.16485	2.11915	11.0231	0.105601	0.098662	0.045109	65.3927	6.03106	up
GO:0043200	response to amino acid	biological_process	6	0.00214847	ENSRNOG00000013304	Arg1	arginase 1 [Source:RGD Symbol;Acc:2150]	38.2968	26.0177	49.9768	8.35733	12.4054	14.4375	3.24689	1.69906	up
GO:0044849	estrous cycle	biological_process	5	0.00225021	ENSRNOG00000004854	Has2	hyaluronan synthase 2 [Source:RGD Symbol;Acc:2781]	0.632455	0.404069	0.485014	0.116629	0.11933	0.20685	3.4361	1.78077	up
GO:0044849	estrous cycle	biological_process	5	0.00225021	ENSRNOG00000010994	Has1	hyaluronan synthase 1 [Source:RGD Symbol;Acc:708528]	2.04263	1.86301	4.06113	0.791237	1.41846	0.81575	2.63326	1.39685	up
GO:0044849	estrous cycle	biological_process	5	0.00225021	ENSRNOG00000019422	Egr1	early growth response 1 [Source:RGD Symbol;Acc:2544]	28.8778	81.6766	49.115	5.6807	12.1778	9.44428	5.8481	2.54797	up
GO:0071280	cellular response to copper ion	biological_process	8	0.00225021	ENSRNOG00000008656	Snca	synuclein alpha [Source:RGD Symbol;Acc:3729]	0.033831	0	0.067124	0.192924	0.624332	0.823897	0.0615147	-4.02293	down
GO:0071280	cellular response to copper ion	biological_process	8	0.00225021	ENSRNOG00000019500	Cyp1a1	cytochrome P450, family 1, subfamily a, polypeptide 1 [Source:RGD Symbol;Acc:2458]	3.79747	8.76837	3.6107	28.2685	25.6761	8.90865	0.25737	-1.95808	down
GO:0071280	cellular response to copper ion	biological_process	8	0.00225021	ENSRNOG00000043098	Mt2A	metallothionein 2A [Source:RGD Symbol;Acc:1592345]	46.8268	38.1857	98.9606	22.5488	25.925	34.0743	2.22868	1.15619	up
GO:0002376	immune system process	biological_process	3	0.0022654	ENSRNOG00000011557	S100a8	S100 calcium binding protein A8 [Source:RGD Symbol;Acc:620265]	58.764	26.4357	40.8193	6.86219	14.8878	7.83776	4.25916	2.09057	up
GO:0002376	immune system process	biological_process	3	0.0022654	ENSRNOG00000013304	Arg1	arginase 1 [Source:RGD Symbol;Acc:2150]	38.2968	26.0177	49.9768	8.35733	12.4054	14.4375	3.24689	1.69906	up
GO:0002376	immune system process	biological_process	3	0.0022654	ENSRNOG00000013859	Bpifa1	BPI fold containing family A, member 1 [Source:RGD Symbol;Acc:619818]	1.77021	0.810251	0.062944	0.423531	0.205181	928.063	0.00284637	-8.45666	down
GO:0002376	immune system process	biological_process	3	0.0022654	ENSRNOG00000013973	Lcn2	lipocalin 2 [Source:RGD Symbol;Acc:69408]	1594.83	895.005	2315.86	399.193	738.611	424.407	3.07622	1.62116	up
GO:0002376	immune system process	biological_process	3	0.0022654	ENSRNOG00000022067	Tlr5	toll-like receptor 5 [Source:RGD Symbol;Acc:631351]	1.22779	1.25646	1.08737	3.79088	2.48157	3.94515	0.349555	-1.51641	down
GO:0002376	immune system process	biological_process	3	0.0022654	ENSRNOG00000028250	Lax1	lymphocyte transmembrane adaptor 1 [Source:RGD Symbol;Acc:1563522]	2.42339	2.90581	1.50243	6.54694	3.8691	8.02388	0.370481	-1.43253	down
GO:0002376	immune system process	biological_process	3	0.0022654	ENSRNOG00000037467	Ffar3	free fatty acid receptor 3 [Source:RGD Symbol;Acc:1311035]	0.218127	0.129805	0.377051	0	0	0	2416.61	11.2388	up
GO:0002376	immune system process	biological_process	3	0.0022654	ENSRNOG00000050998	AABR07044397		0	0	0	0	10.0785	0	2.97664e-05	-15.036	down
GO:0008202	steroid metabolic process	biological_process	6	0.00227367	ENSRNOG00000012458	Cyp2e1	cytochrome P450, family 2, subfamily e, polypeptide 1 [Source:RGD Symbol;Acc:2475]	1.59029	2.0422	0.503894	5.70974	4.74285	4.83838	0.270512	-1.88624	down
GO:0008202	steroid metabolic process	biological_process	6	0.00227367	ENSRNOG00000019120	Hmgcs2	3-hydroxy-3-methylglutaryl-CoA synthase 2 [Source:RGD Symbol;Acc:2804]	5.71888	6.61347	2.53401	17.9587	10.1034	13.6071	0.356771	-1.48693	down
GO:0008202	steroid metabolic process	biological_process	6	0.00227367	ENSRNOG00000019500	Cyp1a1	cytochrome P450, family 1, subfamily a, polypeptide 1 [Source:RGD Symbol;Acc:2458]	3.79747	8.76837	3.6107	28.2685	25.6761	8.90865	0.25737	-1.95808	down
GO:0008202	steroid metabolic process	biological_process	6	0.00227367	ENSRNOG00000038319	Akr1c19	aldo-keto reductase family 1, member C19 [Source:RGD Symbol;Acc:1562954]	4.58014	5.43589	2.94887	7.99767	9.39868	9.74826	0.477623	-1.06605	down
GO:0008202	steroid metabolic process	biological_process	6	0.00227367	ENSRNOG00000058568	Dhrs9	dehydrogenase/reductase 9 [Source:RGD Symbol;Acc:620655]	9.49096	6.67188	18.1665	1.17878	2.82958	3.45117	4.60207	2.20228	up
GO:0005509	calcium ion binding	molecular_function	7	0.00234095	ENSRNOG00000002794	Selp	selectin P [Source:RGD Symbol;Acc:3656]	3.596	2.43421	6.01392	0.725463	1.69202	1.63187	2.97434	1.57257	up
GO:0005509	calcium ion binding	molecular_function	7	0.00234095	ENSRNOG00000007744	Ehd3	EH-domain containing 3 [Source:RGD Symbol;Acc:621762]	3.25928	4.95947	3.3248	14.1598	7.02137	7.48551	0.402681	-1.31229	down
GO:0005509	calcium ion binding	molecular_function	7	0.00234095	ENSRNOG00000008656	Snca	synuclein alpha [Source:RGD Symbol;Acc:3729]	0.033831	0	0.067124	0.192924	0.624332	0.823897	0.0615147	-4.02293	down
GO:0005509	calcium ion binding	molecular_function	7	0.00234095	ENSRNOG00000010529	Thbs2	thrombospondin 2 [Source:RGD Symbol;Acc:1310979]	16.9175	9.7328	15.9974	2.57939	6.01878	6.82916	2.76443	1.46698	up
GO:0005509	calcium ion binding	molecular_function	7	0.00234095	ENSRNOG00000011039	Gch1	GTP cyclohydrolase 1 [Source:RGD Symbol;Acc:61992]	24.2456	21.4661	37.719	10.8419	15.8192	13.7037	2.06692	1.04748	up
GO:0005509	calcium ion binding	molecular_function	7	0.00234095	ENSRNOG00000011483	S100a9	S100 calcium binding protein A9 [Source:RGD Symbol;Acc:620267]	111.507	62.986	76.8319	20.221	25.7548	22.6237	3.66366	1.87329	up
GO:0005509	calcium ion binding	molecular_function	7	0.00234095	ENSRNOG00000011557	S100a8	S100 calcium binding protein A8 [Source:RGD Symbol;Acc:620265]	58.764	26.4357	40.8193	6.86219	14.8878	7.83776	4.25916	2.09057	up
GO:0005509	calcium ion binding	molecular_function	7	0.00234095	ENSRNOG00000011971	C1s	complement C1s [Source:RGD Symbol;Acc:619983]	123.565	79.6933	122.779	24.7306	61.2609	68.3441	2.11252	1.07897	up
GO:0005509	calcium ion binding	molecular_function	7	0.00234095	ENSRNOG00000013123	Scube2	signal peptide, CUB domain and EGF like domain containing 2 [Source:RGD Symbol;Acc:1563998]	0.455884	0.895264	0.540782	2.64025	1.38693	1.64651	0.333456	-1.58443	down
GO:0005509	calcium ion binding	molecular_function	7	0.00234095	ENSRNOG00000013306	Pcdh20	protocadherin 20 [Source:RGD Symbol;Acc:1306297]	0.03651	0.090915	0.036121	0.73992	0.089234	0.231952	0.154128	-2.6978	down
GO:0005509	calcium ion binding	molecular_function	7	0.00234095	ENSRNOG00000014409	Myl7	myosin light chain 7 [Source:RGD Symbol;Acc:1308262]	0.119219	0.0167495	0.0100427	0.0271121	0.0105536	57.8738	0.00252129	-8.63162	down
GO:0005509	calcium ion binding	molecular_function	7	0.00234095	ENSRNOG00000016945	Pla2g2a	phospholipase A2 group IIA [Source:RGD Symbol;Acc:620857]	430.776	142.041	305.208	31.8882	19.843	49.1573	8.70292	3.1215	up
GO:0005509	calcium ion binding	molecular_function	7	0.00234095	ENSRNOG00000017060	Ryr2	ryanodine receptor 2 [Source:RGD Symbol;Acc:620314]	0.186399	0.211602	0.108926	0.285075	0.300051	1.47817	0.245687	-2.0251	down
GO:0005509	calcium ion binding	molecular_function	7	0.00234095	ENSRNOG00000018991	Gsn	gelsolin [Source:RGD Symbol;Acc:1303089]	421.812	450.543	281.254	941.528	460.793	1133.21	0.454977	-1.13614	down
GO:0005509	calcium ion binding	molecular_function	7	0.00234095	ENSRNOG00000029903	Spock3	SPARC/osteonectin, cwcv and kazal like domains proteoglycan 3 [Source:RGD Symbol;Acc:1305672]	0.278628	0.812314	0.4091	1.92492	1.27859	1.12195	0.346794	-1.52785	down
GO:0005509	calcium ion binding	molecular_function	7	0.00234095	ENSRNOG00000031955	Calml3	calmodulin-like 3 [Source:RGD Symbol;Acc:1305499]	8.24095	6.21762	6.22888	7.09436	20.7509	26.911	0.37781	-1.40427	down
GO:0005509	calcium ion binding	molecular_function	7	0.00234095	ENSRNOG00000045829	Thbs1	thrombospondin 1 [Source:RGD Symbol;Acc:1588455]	69.4641	106.372	164.303	44.915	55.3273	28.7153	2.6376	1.39923	up
GO:0005509	calcium ion binding	molecular_function	7	0.00234095	ENSRNOG00000048194	LOC100912380	calpain, small subunit 1 [Source:RGD Symbol;Acc:2270]	94.0081	113.199	123.227	39.8011	72.6749	43.7986	2.11445	1.08028	up
GO:0005509	calcium ion binding	molecular_function	7	0.00234095	ENSRNOG00000060054	Doc2b	double C2 domain beta [Source:RGD Symbol;Acc:620519]	0.999362	1.10969	1.00828	3.02848	2.80703	2.03421	0.396117	-1.336	down
GO:0050661	NADP binding	molecular_function	6	0.00237352	ENSRNOG00000003510	Fmo2	flavin containing dimethylaniline monoxygenase 2 [Source:RGD Symbol;Acc:628600]	36.2628	40.8993	13.9322	160.378	105.178	155.493	0.216351	-2.20855	down
GO:0050661	NADP binding	molecular_function	6	0.00237352	ENSRNOG00000003620	Fmo3	flavin containing dimethylaniline monoxygenase 3 [Source:RGD Symbol;Acc:619761]	5.58543	7.00354	2.57024	22.1896	18.4762	39.5247	0.18904	-2.40324	down
GO:0050661	NADP binding	molecular_function	6	0.00237352	ENSRNOG00000013521	Dhfr	dihydrofolate reductase [Source:RGD Symbol;Acc:2500]	4.22122	4.13326	5.03549	1.90962	1.4482	2.93528	2.12772	1.08931	up
GO:0050661	NADP binding	molecular_function	6	0.00237352	ENSRNOG00000049851	Fmo6	flavin containing monooxygenase 6 [Source:RGD Symbol;Acc:1559491]	0.023136	0.014864	0.04261	0.734681	0.198205	13.4635	0.00559931	-7.48054	down
GO:0048471	perinuclear region of cytoplasm	cellular_component	6	0.0025017	ENSRNOG00000002723	Sele	selectin E [Source:RGD Symbol;Acc:3654]	2.98187	1.19921	3.6168	0.148222	0.414433	0.461137	7.61667	2.92916	up
GO:0048471	perinuclear region of cytoplasm	cellular_component	6	0.0025017	ENSRNOG00000006663	Usp2	ubiquitin specific peptidase 2 [Source:RGD Symbol;Acc:621073]	1.18283	1.2068	0.978434	2.11364	2.35493	3.93105	0.400979	-1.3184	down
GO:0048471	perinuclear region of cytoplasm	cellular_component	6	0.0025017	ENSRNOG00000007159	Ccl2	C-C motif chemokine ligand 2 [Source:RGD Symbol;Acc:3645]	37.7066	18.9936	41.8423	1.13671	3.71253	3.7896	11.4069	3.51183	up
GO:0048471	perinuclear region of cytoplasm	cellular_component	6	0.0025017	ENSRNOG00000007744	Ehd3	EH-domain containing 3 [Source:RGD Symbol;Acc:621762]	3.25928	4.95947	3.3248	14.1598	7.02137	7.48551	0.402681	-1.31229	down
GO:0048471	perinuclear region of cytoplasm	cellular_component	6	0.0025017	ENSRNOG00000008176	Nppa	natriuretic peptide A [Source:RGD Symbol;Acc:3193]	0	0	0	0	0	4.77912	6.27731e-05	-13.9595	down
GO:0048471	perinuclear region of cytoplasm	cellular_component	6	0.0025017	ENSRNOG00000008656	Snca	synuclein alpha [Source:RGD Symbol;Acc:3729]	0.033831	0	0.067124	0.192924	0.624332	0.823897	0.0615147	-4.02293	down
GO:0048471	perinuclear region of cytoplasm	cellular_component	6	0.0025017	ENSRNOG00000012878	Atp7b	ATPase copper transporting beta [Source:RGD Symbol;Acc:2180]	0.320325	0.146971	0.19402	0.561531	0.322591	3.50668	0.150614	-2.73107	down
GO:0048471	perinuclear region of cytoplasm	cellular_component	6	0.0025017	ENSRNOG00000014117	Hmox1	heme oxygenase 1 [Source:RGD Symbol;Acc:2806]	551.077	151.281	396.168	31.9406	70.2869	56.3487	6.92743	2.79232	up
GO:0048471	perinuclear region of cytoplasm	cellular_component	6	0.0025017	ENSRNOG00000014320	Inhba	inhibin subunit beta A [Source:RGD Symbol;Acc:62074]	1.43305	0.871656	0.743097	0.137745	0.416838	0.219709	3.93625	1.97682	up
GO:0048471	perinuclear region of cytoplasm	cellular_component	6	0.0025017	ENSRNOG00000016945	Pla2g2a	phospholipase A2 group IIA [Source:RGD Symbol;Acc:620857]	430.776	142.041	305.208	31.8882	19.843	49.1573	8.70292	3.1215	up
GO:0048471	perinuclear region of cytoplasm	cellular_component	6	0.0025017	ENSRNOG00000018839	Ntrk2	neurotrophic receptor tyrosine kinase 2 [Source:RGD Symbol;Acc:3213]	2.74908	5.01041	5.1754	1.89725	0.712652	1.98932	2.81241	1.49181	up
GO:0048471	perinuclear region of cytoplasm	cellular_component	6	0.0025017	ENSRNOG00000018991	Gsn	gelsolin [Source:RGD Symbol;Acc:1303089]	421.812	450.543	281.254	941.528	460.793	1133.21	0.454977	-1.13614	down
GO:0048471	perinuclear region of cytoplasm	cellular_component	6	0.0025017	ENSRNOG00000019433	Rab3a	RAB3A, member RAS oncogene family [Source:RGD Symbol;Acc:3528]	5.25359	6.66674	3.95532	13.6283	11.8968	8.19245	0.470843	-1.08668	down
GO:0048471	perinuclear region of cytoplasm	cellular_component	6	0.0025017	ENSRNOG00000019622	Ackr3	atypical chemokine receptor 3 [Source:RGD Symbol;Acc:620601]	76.304	96.1834	133.552	44.5313	43.6139	45.7138	2.28628	1.193	up
GO:0048471	perinuclear region of cytoplasm	cellular_component	6	0.0025017	ENSRNOG00000020254	Per2	period circadian regulator 2 [Source:RGD Symbol;Acc:61945]	5.08553	8.59563	7.97541	10.986	14.3571	23.4713	0.443651	-1.1725	down
GO:0048471	perinuclear region of cytoplasm	cellular_component	6	0.0025017	ENSRNOG00000022239	Trarg1	trafficking regulator of GLUT4 (SLC2A4) 1 [Source:RGD Symbol;Acc:1307639]	4.0732	4.20618	3.13567	7.29171	5.20973	13.9028	0.432319	-1.20983	down
GO:0048471	perinuclear region of cytoplasm	cellular_component	6	0.0025017	ENSRNOG00000043098	Mt2A	metallothionein 2A [Source:RGD Symbol;Acc:1592345]	46.8268	38.1857	98.9606	22.5488	25.925	34.0743	2.22868	1.15619	up
GO:0009409	response to cold	biological_process	5	0.00261426	ENSRNOG00000004473	Ppargc1a	PPARG coactivator 1 alpha [Source:RGD Symbol;Acc:620925]	0.699099	0.733841	0.380414	1.53806	1.6784	1.50382	0.384163	-1.38021	down
GO:0009409	response to cold	biological_process	5	0.00261426	ENSRNOG00000010278	Il6	interleukin 6 [Source:RGD Symbol;Acc:2901]	3.16485	2.11915	11.0231	0.105601	0.098662	0.045109	65.3927	6.03106	up
GO:0009409	response to cold	biological_process	5	0.00261426	ENSRNOG00000019048	Sod2	superoxide dismutase 2 [Source:RGD Symbol;Acc:3732]	144.337	78.5731	208.619	40.7461	61.5904	73.5054	2.45407	1.29518	up
GO:0009409	response to cold	biological_process	5	0.00261426	ENSRNOG00000046239	LOC100909612	mitochondrial brown fat uncoupling protein 1-like [Source:RGD Symbol;Acc:6502621]	0	0	0	0.110577	0	2.76227	0.000104426	-13.2252	down
GO:0031012	extracellular matrix	cellular_component	4	0.00263343	ENSRNOG00000009646	Nyx	nyctalopin [Source:RGD Symbol;Acc:1561300]	0	0	0.018017	0.208865	0.279967	0.240787	0.0246937	-5.33971	down
GO:0031012	extracellular matrix	cellular_component	4	0.00263343	ENSRNOG00000010208	Timp1	TIMP metallopeptidase inhibitor 1 [Source:RGD Symbol;Acc:621675]	191.725	124.836	377.443	58.9436	79.8218	69.1842	3.33737	1.73871	up
GO:0031012	extracellular matrix	cellular_component	4	0.00263343	ENSRNOG00000010326	Col20a1	collagen type XX alpha 1 chain [Source:RGD Symbol;Acc:1563901]	1.80103	1.4998	1.17096	2.6832	2.16986	4.12626	0.498011	-1.00575	down
GO:0031012	extracellular matrix	cellular_component	4	0.00263343	ENSRNOG00000010529	Thbs2	thrombospondin 2 [Source:RGD Symbol;Acc:1310979]	16.9175	9.7328	15.9974	2.57939	6.01878	6.82916	2.76443	1.46698	up
GO:0031012	extracellular matrix	cellular_component	4	0.00263343	ENSRNOG00000014143	Col24a1	collagen type XXIV alpha 1 chain [Source:RGD Symbol;Acc:1565539]	0.113145	0.123763	0.067519	0.442035	0.327394	0.338754	0.274708	-1.86403	down
GO:0031012	extracellular matrix	cellular_component	4	0.00263343	ENSRNOG00000045684	LOC100910978	extracellular matrix protein 2-like [Source:RGD Symbol;Acc:6495594]	2.20831	2.37103	1.28465	3.92303	4.91467	5.89374	0.39806	-1.32894	down
GO:0031012	extracellular matrix	cellular_component	4	0.00263343	ENSRNOG00000045829	Thbs1	thrombospondin 1 [Source:RGD Symbol;Acc:1588455]	69.4641	106.372	164.303	44.915	55.3273	28.7153	2.6376	1.39923	up
GO:0031012	extracellular matrix	cellular_component	4	0.00263343	ENSRNOG00000051399	Col10a1	collagen type X alpha 1 chain [Source:RGD Symbol;Acc:2371]	0	0.048914	0.043329	0.098932	0.11115	2.12458	0.0395102	-4.66163	down
GO:0031012	extracellular matrix	cellular_component	4	0.00263343	ENSRNOG00000058645	Tnc	tenascin C [Source:RGD Symbol;Acc:621057]	32.8819	24.6221	38.6851	10.8562	17.6057	12.6766	2.33817	1.22538	up
GO:1902042	negative regulation of extrinsic apoptotic signaling pathway via death domain receptors	biological_process	11	0.00264296	ENSRNOG00000001414	Serpine1	serpin family E member 1 [Source:RGD Symbol;Acc:3249]	55.409	67.7847	164.683	17.9559	19.5535	21.1919	4.90409	2.29399	up
GO:1902042	negative regulation of extrinsic apoptotic signaling pathway via death domain receptors	biological_process	11	0.00264296	ENSRNOG00000014117	Hmox1	heme oxygenase 1 [Source:RGD Symbol;Acc:2806]	551.077	151.281	396.168	31.9406	70.2869	56.3487	6.92743	2.79232	up
GO:1902042	negative regulation of extrinsic apoptotic signaling pathway via death domain receptors	biological_process	11	0.00264296	ENSRNOG00000025074	Fgg	fibrinogen gamma chain [Source:RGD Symbol;Acc:2613]	127.794	78.6948	180.988	61.9913	70.073	37.5544	2.2844	1.19181	up
GO:0005791	rough endoplasmic reticulum	cellular_component	7	0.00279956	ENSRNOG00000007159	Ccl2	C-C motif chemokine ligand 2 [Source:RGD Symbol;Acc:3645]	37.7066	18.9936	41.8423	1.13671	3.71253	3.7896	11.4069	3.51183	up
GO:0005791	rough endoplasmic reticulum	cellular_component	7	0.00279956	ENSRNOG00000008656	Snca	synuclein alpha [Source:RGD Symbol;Acc:3729]	0.033831	0	0.067124	0.192924	0.624332	0.823897	0.0615147	-4.02293	down
GO:0005791	rough endoplasmic reticulum	cellular_component	7	0.00279956	ENSRNOG00000010210	Slc7a11	solute carrier family 7 member 11 [Source:RGD Symbol;Acc:1309275]	0.785658	0.686638	0.778759	0.116861	0.130128	0.355379	3.73701	1.90188	up
GO:0005791	rough endoplasmic reticulum	cellular_component	7	0.00279956	ENSRNOG00000018827	LOC103694905	5-hydroxytryptamine receptor 7 [Source:RGD Symbol;Acc:9265298]	0.601136	0.302224	0.67299	0.0940072	0.184716	0.168906	3.52156	1.81621	up
GO:0005791	rough endoplasmic reticulum	cellular_component	7	0.00279956	ENSRNOG00000018839	Ntrk2	neurotrophic receptor tyrosine kinase 2 [Source:RGD Symbol;Acc:3213]	2.74908	5.01041	5.1754	1.89725	0.712652	1.98932	2.81241	1.49181	up
GO:0010757	negative regulation of plasminogen activation	biological_process	11	0.00317808	ENSRNOG00000001414	Serpine1	serpin family E member 1 [Source:RGD Symbol;Acc:3249]	55.409	67.7847	164.683	17.9559	19.5535	21.1919	4.90409	2.29399	up
GO:0010757	negative regulation of plasminogen activation	biological_process	11	0.00317808	ENSRNOG00000045829	Thbs1	thrombospondin 1 [Source:RGD Symbol;Acc:1588455]	69.4641	106.372	164.303	44.915	55.3273	28.7153	2.6376	1.39923	up
GO:0031394	positive regulation of prostaglandin biosynthetic process	biological_process	12	0.00317808	ENSRNOG00000004400	Avpr1a	arginine vasopressin receptor 1A [Source:RGD Symbol;Acc:2185]	0.884247	0.991065	0.583946	1.63749	2.34024	1.80556	0.425235	-1.23367	down
GO:0031394	positive regulation of prostaglandin biosynthetic process	biological_process	12	0.00317808	ENSRNOG00000004649	Il1b	interleukin 1 beta [Source:RGD Symbol;Acc:2891]	17.0922	15.7097	15.266	6.22867	5.3594	4.98742	2.89994	1.53602	up
GO:0008556	potassium transmembrane transporter activity, phosphorylative mechanism	molecular_function	10	0.00317808	ENSRNOG00000007290	Atp1a2	ATPase Na+/K+ transporting subunit alpha 2 [Source:RGD Symbol;Acc:2168]	1.11361	2.2107	0.439613	6.02731	3.2216	13.5037	0.165429	-2.59572	down
GO:0008556	potassium transmembrane transporter activity, phosphorylative mechanism	molecular_function	10	0.00317808	ENSRNOG00000020263	Atp1a3	ATPase Na+/K+ transporting subunit alpha 3 [Source:RGD Symbol;Acc:2169]	1.61757	1.90245	1.13016	0.671541	0.692308	0.956255	2.0043	1.0031	up
GO:0086036	regulation of cardiac muscle cell membrane potential	biological_process	6	0.00317808	ENSRNOG00000007744	Ehd3	EH-domain containing 3 [Source:RGD Symbol;Acc:621762]	3.25928	4.95947	3.3248	14.1598	7.02137	7.48551	0.402681	-1.31229	down
GO:0086036	regulation of cardiac muscle cell membrane potential	biological_process	6	0.00317808	ENSRNOG00000020263	Atp1a3	ATPase Na+/K+ transporting subunit alpha 3 [Source:RGD Symbol;Acc:2169]	1.61757	1.90245	1.13016	0.671541	0.692308	0.956255	2.0043	1.0031	up
GO:0005577	fibrinogen complex	cellular_component	4	0.00317808	ENSRNOG00000025074	Fgg	fibrinogen gamma chain [Source:RGD Symbol;Acc:2613]	127.794	78.6948	180.988	61.9913	70.073	37.5544	2.2844	1.19181	up
GO:0005577	fibrinogen complex	cellular_component	4	0.00317808	ENSRNOG00000045829	Thbs1	thrombospondin 1 [Source:RGD Symbol;Acc:1588455]	69.4641	106.372	164.303	44.915	55.3273	28.7153	2.6376	1.39923	up
GO:1903779	regulation of cardiac conduction	biological_process	9	0.00317808	ENSRNOG00000007744	Ehd3	EH-domain containing 3 [Source:RGD Symbol;Acc:621762]	3.25928	4.95947	3.3248	14.1598	7.02137	7.48551	0.402681	-1.31229	down
GO:1903779	regulation of cardiac conduction	biological_process	9	0.00317808	ENSRNOG00000028225	Tnni3k	TNNI3 interacting kinase [Source:RGD Symbol;Acc:727908]	0	0	0	0	0	0.62319	0.000481394	-11.0205	down
GO:0019722	calcium-mediated signaling	biological_process	7	0.00319573	ENSRNOG00000002372	Sgcd	sarcoglycan, delta [Source:RGD Symbol;Acc:1306638]	0.93466	1.49454	1.00184	2.76866	3.11875	2.25635	0.421309	-1.24705	down
GO:0019722	calcium-mediated signaling	biological_process	7	0.00319573	ENSRNOG00000004400	Avpr1a	arginine vasopressin receptor 1A [Source:RGD Symbol;Acc:2185]	0.884247	0.991065	0.583946	1.63749	2.34024	1.80556	0.425235	-1.23367	down
GO:0019722	calcium-mediated signaling	biological_process	7	0.00319573	ENSRNOG00000017060	Ryr2	ryanodine receptor 2 [Source:RGD Symbol;Acc:620314]	0.186399	0.211602	0.108926	0.285075	0.300051	1.47817	0.245687	-2.0251	down
GO:0019722	calcium-mediated signaling	biological_process	7	0.00319573	ENSRNOG00000019622	Ackr3	atypical chemokine receptor 3 [Source:RGD Symbol;Acc:620601]	76.304	96.1834	133.552	44.5313	43.6139	45.7138	2.28628	1.193	up
GO:0019722	calcium-mediated signaling	biological_process	7	0.00319573	ENSRNOG00000031955	Calml3	calmodulin-like 3 [Source:RGD Symbol;Acc:1305499]	8.24095	6.21762	6.22888	7.09436	20.7509	26.911	0.37781	-1.40427	down
GO:0002548	monocyte chemotaxis	biological_process	6	0.00354893	ENSRNOG00000000239	Ccl7	C-C motif chemokine ligand 7 [Source:RGD Symbol;Acc:1359152]	14.4232	11.1589	18.1968	0.371988	1.4184	3.33763	8.53719	3.09376	up
GO:0002548	monocyte chemotaxis	biological_process	6	0.00354893	ENSRNOG00000007159	Ccl2	C-C motif chemokine ligand 2 [Source:RGD Symbol;Acc:3645]	37.7066	18.9936	41.8423	1.13671	3.71253	3.7896	11.4069	3.51183	up
GO:0002548	monocyte chemotaxis	biological_process	6	0.00354893	ENSRNOG00000029768	Ccl12	chemokine (C-C motif) ligand 12 [Source:RGD Symbol;Acc:1309255]	6.0007	2.47451	2.57848	0.194217	0.89901	0.367082	7.56941	2.92018	up
GO:0048247	lymphocyte chemotaxis	biological_process	6	0.00354893	ENSRNOG00000000239	Ccl7	C-C motif chemokine ligand 7 [Source:RGD Symbol;Acc:1359152]	14.4232	11.1589	18.1968	0.371988	1.4184	3.33763	8.53719	3.09376	up
GO:0048247	lymphocyte chemotaxis	biological_process	6	0.00354893	ENSRNOG00000007159	Ccl2	C-C motif chemokine ligand 2 [Source:RGD Symbol;Acc:3645]	37.7066	18.9936	41.8423	1.13671	3.71253	3.7896	11.4069	3.51183	up
GO:0048247	lymphocyte chemotaxis	biological_process	6	0.00354893	ENSRNOG00000029768	Ccl12	chemokine (C-C motif) ligand 12 [Source:RGD Symbol;Acc:1309255]	6.0007	2.47451	2.57848	0.194217	0.89901	0.367082	7.56941	2.92018	up
GO:0051412	response to corticosterone	biological_process	9	0.00354893	ENSRNOG00000004400	Avpr1a	arginine vasopressin receptor 1A [Source:RGD Symbol;Acc:2185]	0.884247	0.991065	0.583946	1.63749	2.34024	1.80556	0.425235	-1.23367	down
GO:0051412	response to corticosterone	biological_process	9	0.00354893	ENSRNOG00000018827	LOC103694905	5-hydroxytryptamine receptor 7 [Source:RGD Symbol;Acc:9265298]	0.601136	0.302224	0.67299	0.0940072	0.184716	0.168906	3.52156	1.81621	up
GO:0051412	response to corticosterone	biological_process	9	0.00354893	ENSRNOG00000046667	Fosb	FosB proto-oncogene, AP-1 transcription factor subunit [Source:RGD Symbol;Acc:1308198]	4.40301	29.0803	28.1312	2.28038	1.38324	1.99461	10.8894	3.44485	up
GO:0004252	serine-type endopeptidase activity	molecular_function	8	0.00358283	ENSRNOG00000002302	Corin	corin, serine peptidase [Source:RGD Symbol;Acc:727887]	0.106521	0.316943	0.05572	0.485884	0.896918	1.82259	0.149493	-2.74185	down
GO:0004252	serine-type endopeptidase activity	molecular_function	8	0.00358283	ENSRNOG00000011800	F3	coagulation factor III, tissue factor [Source:RGD Symbol;Acc:2587]	167.292	169.907	352.923	78.9706	86.6779	136.29	2.28564	1.1926	up
GO:0004252	serine-type endopeptidase activity	molecular_function	8	0.00358283	ENSRNOG00000011971	C1s	complement C1s [Source:RGD Symbol;Acc:619983]	123.565	79.6933	122.779	24.7306	61.2609	68.3441	2.11252	1.07897	up
GO:0004252	serine-type endopeptidase activity	molecular_function	8	0.00358283	ENSRNOG00000021619	Cela3b	chymotrypsin like elastase 3B [Source:RGD Symbol;Acc:1307819]	4.59201	1.0716	1.36544	0.166971	0.241357	0.602875	6.95118	2.79726	up
GO:0004252	serine-type endopeptidase activity	molecular_function	8	0.00358283	ENSRNOG00000023858	Prss39	protease, serine, 39 [Source:RGD Symbol;Acc:1309276]	0.61737	0.670793	0.291965	1.66844	0.90005	1.6692	0.372875	-1.42324	down
GO:0004252	serine-type endopeptidase activity	molecular_function	8	0.00358283	ENSRNOG00000039698	Prss22	serine protease 22 [Source:RGD Symbol;Acc:1310880]	4.82992	3.06223	7.18291	0.201666	0.87817	2.2045	4.58999	2.19849	up
GO:0004252	serine-type endopeptidase activity	molecular_function	8	0.00358283	ENSRNOG00000046764	Tmprss11a	transmembrane serine protease 11A [Source:RGD Symbol;Acc:1596322]	0	0	0	0	0	9.5822	3.1308e-05	-14.9631	down
GO:0004252	serine-type endopeptidase activity	molecular_function	8	0.00358283	ENSRNOG00000051158	Cfb	complement factor B [Source:RGD Symbol;Acc:2204]	504.105	354.647	440.239	134.428	208.694	220.508	2.30469	1.20457	up
GO:0060326	cell chemotaxis	biological_process	6	0.0038635	ENSRNOG00000002802	Cxcl1	C-X-C motif chemokine ligand 1 [Source:RGD Symbol;Acc:619869]	37.7589	31.9443	77.5216	7.05145	18.0701	6.03944	4.72466	2.24021	up
GO:0060326	cell chemotaxis	biological_process	6	0.0038635	ENSRNOG00000011406	Ccl4	C-C motif chemokine ligand 4 [Source:RGD Symbol;Acc:620441]	11.707	5.81372	6.12502	3.35851	3.36341	2.87314	2.46437	1.30122	up
GO:0060326	cell chemotaxis	biological_process	6	0.0038635	ENSRNOG00000011984	Cxcl14	C-X-C motif chemokine ligand 14 [Source:RGD Symbol;Acc:1307406]	15.4854	17.2001	9.52316	46.4304	41.5978	22.8916	0.380533	-1.39391	down
GO:0060326	cell chemotaxis	biological_process	6	0.0038635	ENSRNOG00000019622	Ackr3	atypical chemokine receptor 3 [Source:RGD Symbol;Acc:620601]	76.304	96.1834	133.552	44.5313	43.6139	45.7138	2.28628	1.193	up
GO:0060326	cell chemotaxis	biological_process	6	0.0038635	ENSRNOG00000038126	Defb3	beta-defensin 3 [Source:RGD Symbol;Acc:1589572]	2.8242	1.80169	2.32766	0.256909	0.469811	0.738769	4.74487	2.24637	up
GO:0001228	DNA-binding transcription activator activity, RNA polymerase II-specific	molecular_function	6	0.00393289	ENSRNOG00000000640	Egr2	early growth response 2 [Source:RGD Symbol;Acc:621608]	3.15739	6.1992	6.47142	1.3654	1.96587	0.959568	3.68879	1.88315	up
GO:0001228	DNA-binding transcription activator activity, RNA polymerase II-specific	molecular_function	6	0.00393289	ENSRNOG00000002456	Hlf	HLF transcription factor, PAR bZIP family member [Source:RGD Symbol;Acc:1582828]	2.24187	2.70773	1.96198	5.66715	7.0465	4.85039	0.393508	-1.34554	down
GO:0001228	DNA-binding transcription activator activity, RNA polymerase II-specific	molecular_function	6	0.00393289	ENSRNOG00000013074	Wt1	WT1 transcription factor [Source:RGD Symbol;Acc:3974]	6.51322	3.77358	7.11635	1.80892	3.61924	2.35499	2.236	1.16092	up
GO:0001228	DNA-binding transcription activator activity, RNA polymerase II-specific	molecular_function	6	0.00393289	ENSRNOG00000014448	Arntl	aryl hydrocarbon receptor nuclear translocator-like [Source:RGD Symbol;Acc:62003]	7.69285	5.52374	7.07682	4.26659	2.17754	3.16265	2.1124	1.07889	up
GO:0001228	DNA-binding transcription activator activity, RNA polymerase II-specific	molecular_function	6	0.00393289	ENSRNOG00000016181	Tbx20	T-box 20 [Source:RGD Symbol;Acc:1309396]	0	0	0	0	0	0.778032	0.000385588	-11.3407	down
GO:0001228	DNA-binding transcription activator activity, RNA polymerase II-specific	molecular_function	6	0.00393289	ENSRNOG00000017808	Klf15	Kruppel-like factor 15 [Source:RGD Symbol;Acc:70918]	4.0834	7.67358	3.25876	24.0662	14.6325	13.7301	0.286403	-1.80388	down
GO:0001228	DNA-binding transcription activator activity, RNA polymerase II-specific	molecular_function	6	0.00393289	ENSRNOG00000019383	Tef	TEF transcription factor, PAR bZIP family member [Source:RGD Symbol;Acc:3841]	23.7942	29.9373	18.417	43.5098	55.0498	60.271	0.454249	-1.13845	down
GO:0001228	DNA-binding transcription activator activity, RNA polymerase II-specific	molecular_function	6	0.00393289	ENSRNOG00000019422	Egr1	early growth response 1 [Source:RGD Symbol;Acc:2544]	28.8778	81.6766	49.115	5.6807	12.1778	9.44428	5.8481	2.54797	up
GO:0001228	DNA-binding transcription activator activity, RNA polymerase II-specific	molecular_function	6	0.00393289	ENSRNOG00000021027	Dbp	D-box binding PAR bZIP transcription factor [Source:RGD Symbol;Acc:2491]	8.27444	13.9751	6.57459	23.8057	42.1863	32.955	0.291308	-1.77938	down
GO:0001228	DNA-binding transcription activator activity, RNA polymerase II-specific	molecular_function	6	0.00393289	ENSRNOG00000028025	Aknad1	AKNA domain containing 1 [Source:RGD Symbol;Acc:1583957]	0	0	0	0.04777	0.160116	0.135858	0.000872743	-10.1622	down
GO:0001228	DNA-binding transcription activator activity, RNA polymerase II-specific	molecular_function	6	0.00393289	ENSRNOG00000042838	Junb	JunB proto-oncogene, AP-1 transcription factor subunit [Source:RGD Symbol;Acc:2944]	78.6986	148.666	117.666	59.4441	49.5459	34.9588	2.39689	1.26117	up
GO:0001228	DNA-binding transcription activator activity, RNA polymerase II-specific	molecular_function	6	0.00393289	ENSRNOG00000046667	Fosb	FosB proto-oncogene, AP-1 transcription factor subunit [Source:RGD Symbol;Acc:1308198]	4.40301	29.0803	28.1312	2.28038	1.38324	1.99461	10.8894	3.44485	up
GO:0045471	response to ethanol	biological_process	6	0.00410263	ENSRNOG00000000158	Cdo1	cysteine dioxygenase type 1 [Source:RGD Symbol;Acc:69262]	13.6117	16.2309	8.62663	48.0212	33.1986	69.6373	0.255005	-1.9714	down
GO:0045471	response to ethanol	biological_process	6	0.00410263	ENSRNOG00000001926	Cldn1	claudin 1 [Source:RGD Symbol;Acc:68422]	0.854451	0.532531	0.439747	1.41622	1.43284	1.98282	0.378057	-1.40332	down
GO:0045471	response to ethanol	biological_process	6	0.00410263	ENSRNOG00000007159	Ccl2	C-C motif chemokine ligand 2 [Source:RGD Symbol;Acc:3645]	37.7066	18.9936	41.8423	1.13671	3.71253	3.7896	11.4069	3.51183	up
GO:0045471	response to ethanol	biological_process	6	0.00410263	ENSRNOG00000011557	S100a8	S100 calcium binding protein A8 [Source:RGD Symbol;Acc:620265]	58.764	26.4357	40.8193	6.86219	14.8878	7.83776	4.25916	2.09057	up
GO:0045471	response to ethanol	biological_process	6	0.00410263	ENSRNOG00000012458	Cyp2e1	cytochrome P450, family 2, subfamily e, polypeptide 1 [Source:RGD Symbol;Acc:2475]	1.59029	2.0422	0.503894	5.70974	4.74285	4.83838	0.270512	-1.88624	down
GO:0045471	response to ethanol	biological_process	6	0.00410263	ENSRNOG00000018991	Gsn	gelsolin [Source:RGD Symbol;Acc:1303089]	421.812	450.543	281.254	941.528	460.793	1133.21	0.454977	-1.13614	down
GO:0045471	response to ethanol	biological_process	6	0.00410263	ENSRNOG00000058645	Tnc	tenascin C [Source:RGD Symbol;Acc:621057]	32.8819	24.6221	38.6851	10.8562	17.6057	12.6766	2.33817	1.22538	up
GO:0050786	RAGE receptor binding	molecular_function	6	0.00440573	ENSRNOG00000011483	S100a9	S100 calcium binding protein A9 [Source:RGD Symbol;Acc:620267]	111.507	62.986	76.8319	20.221	25.7548	22.6237	3.66366	1.87329	up
GO:0050786	RAGE receptor binding	molecular_function	6	0.00440573	ENSRNOG00000011557	S100a8	S100 calcium binding protein A8 [Source:RGD Symbol;Acc:620265]	58.764	26.4357	40.8193	6.86219	14.8878	7.83776	4.25916	2.09057	up
GO:0005391	sodium:potassium-exchanging ATPase activity	molecular_function	11	0.00440573	ENSRNOG00000007290	Atp1a2	ATPase Na+/K+ transporting subunit alpha 2 [Source:RGD Symbol;Acc:2168]	1.11361	2.2107	0.439613	6.02731	3.2216	13.5037	0.165429	-2.59572	down
GO:0005391	sodium:potassium-exchanging ATPase activity	molecular_function	11	0.00440573	ENSRNOG00000020263	Atp1a3	ATPase Na+/K+ transporting subunit alpha 3 [Source:RGD Symbol;Acc:2169]	1.61757	1.90245	1.13016	0.671541	0.692308	0.956255	2.0043	1.0031	up
GO:0010839	negative regulation of keratinocyte proliferation	biological_process	9	0.00440573	ENSRNOG00000005944	Slurp1	secreted Ly6/Plaur domain containing 1 [Source:RGD Symbol;Acc:1308768]	5.49258	1.6078	5.19726	0.125839	0.800363	0.417785	9.15011	3.19379	up
GO:0010839	negative regulation of keratinocyte proliferation	biological_process	9	0.00440573	ENSRNOG00000014215	Klf9	Kruppel-like factor 9 [Source:RGD Symbol;Acc:70934]	11.9358	17.8583	12.2313	37.3234	29.1884	19.113	0.490808	-1.02677	down
GO:0097242	amyloid-beta clearance	biological_process	4	0.00440573	ENSRNOG00000012779	Msr1	macrophage scavenger receptor 1 [Source:RGD Symbol;Acc:1564316]	12.1959	9.51486	9.14382	4.2104	4.34232	6.3628	2.06862	1.04867	up
GO:0097242	amyloid-beta clearance	biological_process	4	0.00440573	ENSRNOG00000049303	Marco	macrophage receptor with collagenous structure [Source:RGD Symbol;Acc:1589662]	0.632275	0.603204	0.631253	0	0	0	6222.44	12.6033	up
GO:0001878	response to yeast	biological_process	8	0.00440573	ENSRNOG00000010278	Il6	interleukin 6 [Source:RGD Symbol;Acc:2901]	3.16485	2.11915	11.0231	0.105601	0.098662	0.045109	65.3927	6.03106	up
GO:0001878	response to yeast	biological_process	8	0.00440573	ENSRNOG00000033162	Chia	chitinase, acidic [Source:RGD Symbol;Acc:1303058]	315.521	274.274	276.963	62.7794	110.055	141.399	2.75832	1.46379	up
GO:0044326	dendritic spine neck	cellular_component	4	0.00440573	ENSRNOG00000020263	Atp1a3	ATPase Na+/K+ transporting subunit alpha 3 [Source:RGD Symbol;Acc:2169]	1.61757	1.90245	1.13016	0.671541	0.692308	0.956255	2.0043	1.0031	up
GO:0044326	dendritic spine neck	cellular_component	4	0.00440573	ENSRNOG00000028404	Ppp1r1b	protein phosphatase 1, regulatory (inhibitor) subunit 1B [Source:RGD Symbol;Acc:621859]	7.76903	6.02664	5.6708	22.4231	7.67647	15.2862	0.428911	-1.22125	down
GO:0031720	haptoglobin binding	molecular_function	5	0.00440573	ENSRNOG00000045989	Hba-a3	hemoglobin alpha, adult chain 3 [Source:RGD Symbol;Acc:1359209]	29.1036	33.0564	24.4265	54.478	69.3314	104.209	0.379734	-1.39694	down
GO:0031720	haptoglobin binding	molecular_function	5	0.00440573	ENSRNOG00000047321	Hba-a2	hemoglobin alpha, adult chain 2 [Source:RGD Symbol;Acc:1359364]	622.608	817.629	600.355	1003.7	1375.98	1844.64	0.483058	-1.04973	down
GO:0031402	sodium ion binding	molecular_function	8	0.00440573	ENSRNOG00000006639	Scn9a	sodium voltage-gated channel alpha subunit 9 [Source:RGD Symbol;Acc:69368]	0	0	0	0.00415055	0.00708024	0.083853	0.00315511	-8.30809	down
GO:0031402	sodium ion binding	molecular_function	8	0.00440573	ENSRNOG00000007290	Atp1a2	ATPase Na+/K+ transporting subunit alpha 2 [Source:RGD Symbol;Acc:2168]	1.11361	2.2107	0.439613	6.02731	3.2216	13.5037	0.165429	-2.59572	down
GO:0031838	haptoglobin-hemoglobin complex	cellular_component	4	0.00440573	ENSRNOG00000045989	Hba-a3	hemoglobin alpha, adult chain 3 [Source:RGD Symbol;Acc:1359209]	29.1036	33.0564	24.4265	54.478	69.3314	104.209	0.379734	-1.39694	down
GO:0031838	haptoglobin-hemoglobin complex	cellular_component	4	0.00440573	ENSRNOG00000047321	Hba-a2	hemoglobin alpha, adult chain 2 [Source:RGD Symbol;Acc:1359364]	622.608	817.629	600.355	1003.7	1375.98	1844.64	0.483058	-1.04973	down
GO:0006357	regulation of transcription by RNA polymerase II	biological_process	9	0.00454557	ENSRNOG00000000640	Egr2	early growth response 2 [Source:RGD Symbol;Acc:621608]	3.15739	6.1992	6.47142	1.3654	1.96587	0.959568	3.68879	1.88315	up
GO:0006357	regulation of transcription by RNA polymerase II	biological_process	9	0.00454557	ENSRNOG00000002456	Hlf	HLF transcription factor, PAR bZIP family member [Source:RGD Symbol;Acc:1582828]	2.24187	2.70773	1.96198	5.66715	7.0465	4.85039	0.393508	-1.34554	down
GO:0006357	regulation of transcription by RNA polymerase II	biological_process	9	0.00454557	ENSRNOG00000003745	Atf3	activating transcription factor 3 [Source:RGD Symbol;Acc:2165]	10.4013	37.4337	46.2986	3.78197	4.08518	7.17428	6.25829	2.64577	up
GO:0006357	regulation of transcription by RNA polymerase II	biological_process	9	0.00454557	ENSRNOG00000004537	Rxrg	retinoid X receptor gamma [Source:RGD Symbol;Acc:620046]	0.784535	1.26834	0.531943	2.96272	1.86653	2.04611	0.375954	-1.41137	down
GO:0006357	regulation of transcription by RNA polymerase II	biological_process	9	0.00454557	ENSRNOG00000008529	Foxs1	forkhead box S1 [Source:RGD Symbol;Acc:1310679]	7.77912	5.37593	8.16711	2.87759	3.54175	1.83461	2.58327	1.3692	up
GO:0006357	regulation of transcription by RNA polymerase II	biological_process	9	0.00454557	ENSRNOG00000014320	Inhba	inhibin subunit beta A [Source:RGD Symbol;Acc:62074]	1.43305	0.871656	0.743097	0.137745	0.416838	0.219709	3.93625	1.97682	up
GO:0006357	regulation of transcription by RNA polymerase II	biological_process	9	0.00454557	ENSRNOG00000017808	Klf15	Kruppel-like factor 15 [Source:RGD Symbol;Acc:70918]	4.0834	7.67358	3.25876	24.0662	14.6325	13.7301	0.286403	-1.80388	down
GO:0006357	regulation of transcription by RNA polymerase II	biological_process	9	0.00454557	ENSRNOG00000018598	Ankrd1	ankyrin repeat domain 1 [Source:RGD Symbol;Acc:61989]	107.023	107.496	209.618	52.1948	92.124	57.3024	2.10363	1.07288	up
GO:0006357	regulation of transcription by RNA polymerase II	biological_process	9	0.00454557	ENSRNOG00000019048	Sod2	superoxide dismutase 2 [Source:RGD Symbol;Acc:3732]	144.337	78.5731	208.619	40.7461	61.5904	73.5054	2.45407	1.29518	up
GO:0006357	regulation of transcription by RNA polymerase II	biological_process	9	0.00454557	ENSRNOG00000019383	Tef	TEF transcription factor, PAR bZIP family member [Source:RGD Symbol;Acc:3841]	23.7942	29.9373	18.417	43.5098	55.0498	60.271	0.454249	-1.13845	down
GO:0006357	regulation of transcription by RNA polymerase II	biological_process	9	0.00454557	ENSRNOG00000021027	Dbp	D-box binding PAR bZIP transcription factor [Source:RGD Symbol;Acc:2491]	8.27444	13.9751	6.57459	23.8057	42.1863	32.955	0.291308	-1.77938	down
GO:0006357	regulation of transcription by RNA polymerase II	biological_process	9	0.00454557	ENSRNOG00000038909	Pou3f3	POU class 3 homeobox 3 [Source:RGD Symbol;Acc:619768]	0	1.4154	0	0	0	0	4718.01	12.204	up
GO:0006357	regulation of transcription by RNA polymerase II	biological_process	9	0.00454557	ENSRNOG00000042838	Junb	JunB proto-oncogene, AP-1 transcription factor subunit [Source:RGD Symbol;Acc:2944]	78.6986	148.666	117.666	59.4441	49.5459	34.9588	2.39689	1.26117	up
GO:0006357	regulation of transcription by RNA polymerase II	biological_process	9	0.00454557	ENSRNOG00000046667	Fosb	FosB proto-oncogene, AP-1 transcription factor subunit [Source:RGD Symbol;Acc:1308198]	4.40301	29.0803	28.1312	2.28038	1.38324	1.99461	10.8894	3.44485	up
GO:0002027	regulation of heart rate	biological_process	9	0.00462335	ENSRNOG00000016983	Myh7	myosin heavy chain 7 [Source:RGD Symbol;Acc:62030]	0	0.002143	0	0.00806	0.008274	5.03787	0.000424004	-11.2036	down
GO:0002027	regulation of heart rate	biological_process	9	0.00462335	ENSRNOG00000017060	Ryr2	ryanodine receptor 2 [Source:RGD Symbol;Acc:620314]	0.186399	0.211602	0.108926	0.285075	0.300051	1.47817	0.245687	-2.0251	down
GO:0002027	regulation of heart rate	biological_process	9	0.00462335	ENSRNOG00000028225	Tnni3k	TNNI3 interacting kinase [Source:RGD Symbol;Acc:727908]	0	0	0	0	0	0.62319	0.000481394	-11.0205	down
GO:0036120	cellular response to platelet-derived growth factor stimulus	biological_process	6	0.00462335	ENSRNOG00000004854	Has2	hyaluronan synthase 2 [Source:RGD Symbol;Acc:2781]	0.632455	0.404069	0.485014	0.116629	0.11933	0.20685	3.4361	1.78077	up
GO:0036120	cellular response to platelet-derived growth factor stimulus	biological_process	6	0.00462335	ENSRNOG00000007159	Ccl2	C-C motif chemokine ligand 2 [Source:RGD Symbol;Acc:3645]	37.7066	18.9936	41.8423	1.13671	3.71253	3.7896	11.4069	3.51183	up
GO:0036120	cellular response to platelet-derived growth factor stimulus	biological_process	6	0.00462335	ENSRNOG00000010994	Has1	hyaluronan synthase 1 [Source:RGD Symbol;Acc:708528]	2.04263	1.86301	4.06113	0.791237	1.41846	0.81575	2.63326	1.39685	up
GO:0008542	visual learning	biological_process	5	0.00478283	ENSRNOG00000007290	Atp1a2	ATPase Na+/K+ transporting subunit alpha 2 [Source:RGD Symbol;Acc:2168]	1.11361	2.2107	0.439613	6.02731	3.2216	13.5037	0.165429	-2.59572	down
GO:0008542	visual learning	biological_process	5	0.00478283	ENSRNOG00000010210	Slc7a11	solute carrier family 7 member 11 [Source:RGD Symbol;Acc:1309275]	0.785658	0.686638	0.778759	0.116861	0.130128	0.355379	3.73701	1.90188	up
GO:0008542	visual learning	biological_process	5	0.00478283	ENSRNOG00000020263	Atp1a3	ATPase Na+/K+ transporting subunit alpha 3 [Source:RGD Symbol;Acc:2169]	1.61757	1.90245	1.13016	0.671541	0.692308	0.956255	2.0043	1.0031	up
GO:0008542	visual learning	biological_process	5	0.00478283	ENSRNOG00000028404	Ppp1r1b	protein phosphatase 1, regulatory (inhibitor) subunit 1B [Source:RGD Symbol;Acc:621859]	7.76903	6.02664	5.6708	22.4231	7.67647	15.2862	0.428911	-1.22125	down
GO:0006805	xenobiotic metabolic process	biological_process	5	0.00478283	ENSRNOG00000003510	Fmo2	flavin containing dimethylaniline monoxygenase 2 [Source:RGD Symbol;Acc:628600]	36.2628	40.8993	13.9322	160.378	105.178	155.493	0.216351	-2.20855	down
GO:0006805	xenobiotic metabolic process	biological_process	5	0.00478283	ENSRNOG00000012458	Cyp2e1	cytochrome P450, family 2, subfamily e, polypeptide 1 [Source:RGD Symbol;Acc:2475]	1.59029	2.0422	0.503894	5.70974	4.74285	4.83838	0.270512	-1.88624	down
GO:0006805	xenobiotic metabolic process	biological_process	5	0.00478283	ENSRNOG00000028891	Cyp2t1	cytochrome P450, family 2, subfamily t, polypeptide 1 [Source:RGD Symbol;Acc:620086]	2.88466	3.24066	2.34437	4.17459	4.32691	8.6706	0.493224	-1.01969	down
GO:0006805	xenobiotic metabolic process	biological_process	5	0.00478283	ENSRNOG00000032261	Cyp2d4	cytochrome P450, family 2, subfamily d, polypeptide 4 [Source:RGD Symbol;Acc:620640]	3.90219	4.53709	2.88962	9.25606	7.48095	6.29301	0.491919	-1.02351	down
GO:0019221	cytokine-mediated signaling pathway	biological_process	6	0.00505772	ENSRNOG00000002771	Ereg	epiregulin [Source:RGD Symbol;Acc:620299]	3.53527	6.81166	10.5663	1.17724	1.04308	1.27508	5.98307	2.58089	up
GO:0019221	cytokine-mediated signaling pathway	biological_process	6	0.00505772	ENSRNOG00000004649	Il1b	interleukin 1 beta [Source:RGD Symbol;Acc:2891]	17.0922	15.7097	15.266	6.22867	5.3594	4.98742	2.89994	1.53602	up
GO:0019221	cytokine-mediated signaling pathway	biological_process	6	0.00505772	ENSRNOG00000007159	Ccl2	C-C motif chemokine ligand 2 [Source:RGD Symbol;Acc:3645]	37.7066	18.9936	41.8423	1.13671	3.71253	3.7896	11.4069	3.51183	up
GO:0019221	cytokine-mediated signaling pathway	biological_process	6	0.00505772	ENSRNOG00000012259	Il22ra2	interleukin 22 receptor subunit alpha 2 [Source:RGD Symbol;Acc:1303169]	0.262024	0.379088	0.267647	0.746875	0.470208	3.56018	0.190226	-2.39421	down
GO:0019221	cytokine-mediated signaling pathway	biological_process	6	0.00505772	ENSRNOG00000019587	Ptprn	protein tyrosine phosphatase, receptor type, N [Source:RGD Symbol;Acc:620777]	3.28822	1.58827	3.5683	0.404913	0.311202	1.36381	4.06013	2.02153	up
GO:0019221	cytokine-mediated signaling pathway	biological_process	6	0.00505772	ENSRNOG00000033192	Osmr	oncostatin M receptor [Source:RGD Symbol;Acc:1302983]	11.718	9.37308	19.7537	4.6298	7.5865	6.30735	2.20501	1.14079	up
GO:0042327	positive regulation of phosphorylation	biological_process	10	0.00522638	ENSRNOG00000002754	Areg	amphiregulin [Source:RGD Symbol;Acc:2149]	15.0098	32.3225	41.5271	8.39391	7.3053	7.32716	3.85902	1.94824	up
GO:0042327	positive regulation of phosphorylation	biological_process	10	0.00522638	ENSRNOG00000002771	Ereg	epiregulin [Source:RGD Symbol;Acc:620299]	3.53527	6.81166	10.5663	1.17724	1.04308	1.27508	5.98307	2.58089	up
GO:0042327	positive regulation of phosphorylation	biological_process	10	0.00522638	ENSRNOG00000045829	Thbs1	thrombospondin 1 [Source:RGD Symbol;Acc:1588455]	69.4641	106.372	164.303	44.915	55.3273	28.7153	2.6376	1.39923	up
GO:0071353	cellular response to interleukin-4	biological_process	8	0.00522638	ENSRNOG00000004470	Il24	interleukin 24 [Source:RGD Symbol;Acc:621484]	4.71744	2.76935	8.35128	0.401454	0.398275	1.3272	7.44644	2.89655	up
GO:0071353	cellular response to interleukin-4	biological_process	8	0.00522638	ENSRNOG00000011668	Nfil3	nuclear factor, interleukin 3 regulated [Source:RGD Symbol;Acc:620972]	8.36549	8.08717	16.2594	4.32403	3.116	5.24537	2.57872	1.36665	up
GO:0071353	cellular response to interleukin-4	biological_process	8	0.00522638	ENSRNOG00000013304	Arg1	arginase 1 [Source:RGD Symbol;Acc:2150]	38.2968	26.0177	49.9768	8.35733	12.4054	14.4375	3.24689	1.69906	up
GO:2000352	negative regulation of endothelial cell apoptotic process	biological_process	11	0.00522638	ENSRNOG00000001414	Serpine1	serpin family E member 1 [Source:RGD Symbol;Acc:3249]	55.409	67.7847	164.683	17.9559	19.5535	21.1919	4.90409	2.29399	up
GO:2000352	negative regulation of endothelial cell apoptotic process	biological_process	11	0.00522638	ENSRNOG00000015055	Scg2	secretogranin II [Source:RGD Symbol;Acc:3626]	0.035057	0.056805	0.033008	0.243826	0.147987	2.48424	0.0434172	-4.52559	down
GO:2000352	negative regulation of endothelial cell apoptotic process	biological_process	11	0.00522638	ENSRNOG00000025074	Fgg	fibrinogen gamma chain [Source:RGD Symbol;Acc:2613]	127.794	78.6948	180.988	61.9913	70.073	37.5544	2.2844	1.19181	up
GO:0043231	intracellular membrane-bounded organelle	cellular_component	5	0.00549906	ENSRNOG00000000640	Egr2	early growth response 2 [Source:RGD Symbol;Acc:621608]	3.15739	6.1992	6.47142	1.3654	1.96587	0.959568	3.68879	1.88315	up
GO:0043231	intracellular membrane-bounded organelle	cellular_component	5	0.00549906	ENSRNOG00000003510	Fmo2	flavin containing dimethylaniline monoxygenase 2 [Source:RGD Symbol;Acc:628600]	36.2628	40.8993	13.9322	160.378	105.178	155.493	0.216351	-2.20855	down
GO:0043231	intracellular membrane-bounded organelle	cellular_component	5	0.00549906	ENSRNOG00000003620	Fmo3	flavin containing dimethylaniline monoxygenase 3 [Source:RGD Symbol;Acc:619761]	5.58543	7.00354	2.57024	22.1896	18.4762	39.5247	0.18904	-2.40324	down
GO:0043231	intracellular membrane-bounded organelle	cellular_component	5	0.00549906	ENSRNOG00000004473	Ppargc1a	PPARG coactivator 1 alpha [Source:RGD Symbol;Acc:620925]	0.699099	0.733841	0.380414	1.53806	1.6784	1.50382	0.384163	-1.38021	down
GO:0043231	intracellular membrane-bounded organelle	cellular_component	5	0.00549906	ENSRNOG00000008000	Syt13	synaptotagmin 13 [Source:RGD Symbol;Acc:621877]	2.70135	0.876536	2.72914	0.233007	0.977562	0.472531	3.74727	1.90584	up
GO:0043231	intracellular membrane-bounded organelle	cellular_component	5	0.00549906	ENSRNOG00000008656	Snca	synuclein alpha [Source:RGD Symbol;Acc:3729]	0.033831	0	0.067124	0.192924	0.624332	0.823897	0.0615147	-4.02293	down
GO:0043231	intracellular membrane-bounded organelle	cellular_component	5	0.00549906	ENSRNOG00000010210	Slc7a11	solute carrier family 7 member 11 [Source:RGD Symbol;Acc:1309275]	0.785658	0.686638	0.778759	0.116861	0.130128	0.355379	3.73701	1.90188	up
GO:0043231	intracellular membrane-bounded organelle	cellular_component	5	0.00549906	ENSRNOG00000012458	Cyp2e1	cytochrome P450, family 2, subfamily e, polypeptide 1 [Source:RGD Symbol;Acc:2475]	1.59029	2.0422	0.503894	5.70974	4.74285	4.83838	0.270512	-1.88624	down
GO:0043231	intracellular membrane-bounded organelle	cellular_component	5	0.00549906	ENSRNOG00000014117	Hmox1	heme oxygenase 1 [Source:RGD Symbol;Acc:2806]	551.077	151.281	396.168	31.9406	70.2869	56.3487	6.92743	2.79232	up
GO:0043231	intracellular membrane-bounded organelle	cellular_component	5	0.00549906	ENSRNOG00000014448	Arntl	aryl hydrocarbon receptor nuclear translocator-like [Source:RGD Symbol;Acc:62003]	7.69285	5.52374	7.07682	4.26659	2.17754	3.16265	2.1124	1.07889	up
GO:0043231	intracellular membrane-bounded organelle	cellular_component	5	0.00549906	ENSRNOG00000019500	Cyp1a1	cytochrome P450, family 1, subfamily a, polypeptide 1 [Source:RGD Symbol;Acc:2458]	3.79747	8.76837	3.6107	28.2685	25.6761	8.90865	0.25737	-1.95808	down
GO:0043231	intracellular membrane-bounded organelle	cellular_component	5	0.00549906	ENSRNOG00000019622	Ackr3	atypical chemokine receptor 3 [Source:RGD Symbol;Acc:620601]	76.304	96.1834	133.552	44.5313	43.6139	45.7138	2.28628	1.193	up
GO:0043231	intracellular membrane-bounded organelle	cellular_component	5	0.00549906	ENSRNOG00000028891	Cyp2t1	cytochrome P450, family 2, subfamily t, polypeptide 1 [Source:RGD Symbol;Acc:620086]	2.88466	3.24066	2.34437	4.17459	4.32691	8.6706	0.493224	-1.01969	down
GO:0043231	intracellular membrane-bounded organelle	cellular_component	5	0.00549906	ENSRNOG00000032261	Cyp2d4	cytochrome P450, family 2, subfamily d, polypeptide 4 [Source:RGD Symbol;Acc:620640]	3.90219	4.53709	2.88962	9.25606	7.48095	6.29301	0.491919	-1.02351	down
GO:0043231	intracellular membrane-bounded organelle	cellular_component	5	0.00549906	ENSRNOG00000043416	Bcl3	BCL3, transcription coactivator [Source:RGD Symbol;Acc:1589465]	16.3829	10.3304	23.1764	5.68874	5.93954	6.44326	2.76067	1.46502	up
GO:0043231	intracellular membrane-bounded organelle	cellular_component	5	0.00549906	ENSRNOG00000046667	Fosb	FosB proto-oncogene, AP-1 transcription factor subunit [Source:RGD Symbol;Acc:1308198]	4.40301	29.0803	28.1312	2.28038	1.38324	1.99461	10.8894	3.44485	up
GO:0043231	intracellular membrane-bounded organelle	cellular_component	5	0.00549906	ENSRNOG00000049851	Fmo6	flavin containing monooxygenase 6 [Source:RGD Symbol;Acc:1559491]	0.023136	0.014864	0.04261	0.734681	0.198205	13.4635	0.00559931	-7.48054	down
GO:0043231	intracellular membrane-bounded organelle	cellular_component	5	0.00549906	ENSRNOG00000058568	Dhrs9	dehydrogenase/reductase 9 [Source:RGD Symbol;Acc:620655]	9.49096	6.67188	18.1665	1.17878	2.82958	3.45117	4.60207	2.20228	up
GO:0043231	intracellular membrane-bounded organelle	cellular_component	5	0.00549906	ENSRNOG00000059857	Rnd1	Rho family GTPase 1 [Source:RGD Symbol;Acc:1306338]	27.5036	15.5245	33.0023	7.92626	8.32134	9.04674	3.00583	1.58776	up
GO:0004029	aldehyde dehydrogenase (NAD) activity	molecular_function	7	0.00581683	ENSRNOG00000002331	Aldh3a1	aldehyde dehydrogenase 3 family, member A1 [Source:RGD Symbol;Acc:2088]	0.906245	1.33741	0.734843	1.81694	2.09876	14.0727	0.165579	-2.59441	down
GO:0004029	aldehyde dehydrogenase (NAD) activity	molecular_function	7	0.00581683	ENSRNOG00000008586	Aldh1l2	aldehyde dehydrogenase 1 family, member L2 [Source:RGD Symbol;Acc:1309458]	1.58045	0.639397	1.11351	0.097725	0.378507	0.428929	3.68262	1.88073	up
GO:0045103	intermediate filament-based process	biological_process	4	0.00581683	ENSRNOG00000014099	Krt15	keratin 15 [Source:RGD Symbol;Acc:1303044]	0.401932	0.587568	0.379119	2.4004	0.959421	28.7987	0.0425586	-4.55441	down
GO:0045103	intermediate filament-based process	biological_process	4	0.00581683	ENSRNOG00000031785	Krt76	keratin 76 [Source:RGD Symbol;Acc:1303078]	2.72698	3.83802	2.32731	6.86724	7.84121	9.47513	0.367701	-1.4434	down
GO:0050665	hydrogen peroxide biosynthetic process	biological_process	8	0.00581683	ENSRNOG00000019048	Sod2	superoxide dismutase 2 [Source:RGD Symbol;Acc:3732]	144.337	78.5731	208.619	40.7461	61.5904	73.5054	2.45407	1.29518	up
GO:0050665	hydrogen peroxide biosynthetic process	biological_process	8	0.00581683	ENSRNOG00000019500	Cyp1a1	cytochrome P450, family 1, subfamily a, polypeptide 1 [Source:RGD Symbol;Acc:2458]	3.79747	8.76837	3.6107	28.2685	25.6761	8.90865	0.25737	-1.95808	down
GO:0050891	multicellular organismal water homeostasis	biological_process	8	0.00581683	ENSRNOG00000008176	Nppa	natriuretic peptide A [Source:RGD Symbol;Acc:3193]	0	0	0	0	0	4.77912	6.27731e-05	-13.9595	down
GO:0050891	multicellular organismal water homeostasis	biological_process	8	0.00581683	ENSRNOG00000013859	Bpifa1	BPI fold containing family A, member 1 [Source:RGD Symbol;Acc:619818]	1.77021	0.810251	0.062944	0.423531	0.205181	928.063	0.00284637	-8.45666	down
GO:0070492	oligosaccharide binding	molecular_function	5	0.00581683	ENSRNOG00000002723	Sele	selectin E [Source:RGD Symbol;Acc:3654]	2.98187	1.19921	3.6168	0.148222	0.414433	0.461137	7.61667	2.92916	up
GO:0070492	oligosaccharide binding	molecular_function	5	0.00581683	ENSRNOG00000002794	Selp	selectin P [Source:RGD Symbol;Acc:3656]	3.596	2.43421	6.01392	0.725463	1.69202	1.63187	2.97434	1.57257	up
GO:0010042	response to manganese ion	biological_process	7	0.00581683	ENSRNOG00000013304	Arg1	arginase 1 [Source:RGD Symbol;Acc:2150]	38.2968	26.0177	49.9768	8.35733	12.4054	14.4375	3.24689	1.69906	up
GO:0010042	response to manganese ion	biological_process	7	0.00581683	ENSRNOG00000019048	Sod2	superoxide dismutase 2 [Source:RGD Symbol;Acc:3732]	144.337	78.5731	208.619	40.7461	61.5904	73.5054	2.45407	1.29518	up
GO:0043177	organic acid binding	molecular_function	5	0.00581683	ENSRNOG00000045989	Hba-a3	hemoglobin alpha, adult chain 3 [Source:RGD Symbol;Acc:1359209]	29.1036	33.0564	24.4265	54.478	69.3314	104.209	0.379734	-1.39694	down
GO:0043177	organic acid binding	molecular_function	5	0.00581683	ENSRNOG00000047321	Hba-a2	hemoglobin alpha, adult chain 2 [Source:RGD Symbol;Acc:1359364]	622.608	817.629	600.355	1003.7	1375.98	1844.64	0.483058	-1.04973	down
GO:0010882	regulation of cardiac muscle contraction by calcium ion signaling	biological_process	8	0.00581683	ENSRNOG00000007290	Atp1a2	ATPase Na+/K+ transporting subunit alpha 2 [Source:RGD Symbol;Acc:2168]	1.11361	2.2107	0.439613	6.02731	3.2216	13.5037	0.165429	-2.59572	down
GO:0010882	regulation of cardiac muscle contraction by calcium ion signaling	biological_process	8	0.00581683	ENSRNOG00000017060	Ryr2	ryanodine receptor 2 [Source:RGD Symbol;Acc:620314]	0.186399	0.211602	0.108926	0.285075	0.300051	1.47817	0.245687	-2.0251	down
GO:0006729	tetrahydrobiopterin biosynthetic process	biological_process	8	0.00581683	ENSRNOG00000011039	Gch1	GTP cyclohydrolase 1 [Source:RGD Symbol;Acc:61992]	24.2456	21.4661	37.719	10.8419	15.8192	13.7037	2.06692	1.04748	up
GO:0006729	tetrahydrobiopterin biosynthetic process	biological_process	8	0.00581683	ENSRNOG00000013521	Dhfr	dihydrofolate reductase [Source:RGD Symbol;Acc:2500]	4.22122	4.13326	5.03549	1.90962	1.4482	2.93528	2.12772	1.08931	up
GO:0071313	cellular response to caffeine	biological_process	7	0.00581683	ENSRNOG00000004473	Ppargc1a	PPARG coactivator 1 alpha [Source:RGD Symbol;Acc:620925]	0.699099	0.733841	0.380414	1.53806	1.6784	1.50382	0.384163	-1.38021	down
GO:0071313	cellular response to caffeine	biological_process	7	0.00581683	ENSRNOG00000017060	Ryr2	ryanodine receptor 2 [Source:RGD Symbol;Acc:620314]	0.186399	0.211602	0.108926	0.285075	0.300051	1.47817	0.245687	-2.0251	down
GO:1990845	adaptive thermogenesis	biological_process	4	0.00581683	ENSRNOG00000004473	Ppargc1a	PPARG coactivator 1 alpha [Source:RGD Symbol;Acc:620925]	0.699099	0.733841	0.380414	1.53806	1.6784	1.50382	0.384163	-1.38021	down
GO:1990845	adaptive thermogenesis	biological_process	4	0.00581683	ENSRNOG00000046239	LOC100909612	mitochondrial brown fat uncoupling protein 1-like [Source:RGD Symbol;Acc:6502621]	0	0	0	0.110577	0	2.76227	0.000104426	-13.2252	down
GO:0055072	iron ion homeostasis	biological_process	11	0.00587453	ENSRNOG00000013973	Lcn2	lipocalin 2 [Source:RGD Symbol;Acc:69408]	1594.83	895.005	2315.86	399.193	738.611	424.407	3.07622	1.62116	up
GO:0055072	iron ion homeostasis	biological_process	11	0.00587453	ENSRNOG00000014117	Hmox1	heme oxygenase 1 [Source:RGD Symbol;Acc:2806]	551.077	151.281	396.168	31.9406	70.2869	56.3487	6.92743	2.79232	up
GO:0055072	iron ion homeostasis	biological_process	11	0.00587453	ENSRNOG00000019048	Sod2	superoxide dismutase 2 [Source:RGD Symbol;Acc:3732]	144.337	78.5731	208.619	40.7461	61.5904	73.5054	2.45407	1.29518	up
GO:0061844	antimicrobial humoral immune response mediated by antimicrobial peptide	biological_process	7	0.00587453	ENSRNOG00000002792	Cxcl2	C-X-C motif chemokine ligand 2 [Source:RGD Symbol;Acc:70069]	2.67869	3.89774	3.91406	0.2245	0.858824	0.310974	7.52384	2.91147	up
GO:0061844	antimicrobial humoral immune response mediated by antimicrobial peptide	biological_process	7	0.00587453	ENSRNOG00000002843	Cxcl6	C-X-C motif chemokine ligand 6 [Source:RGD Symbol;Acc:708540]	5.43574	1.71607	3.19644	0.056385	0.662585	1.21597	5.34811	2.41903	up
GO:0061844	antimicrobial humoral immune response mediated by antimicrobial peptide	biological_process	7	0.00587453	ENSRNOG00000011483	S100a9	S100 calcium binding protein A9 [Source:RGD Symbol;Acc:620267]	111.507	62.986	76.8319	20.221	25.7548	22.6237	3.66366	1.87329	up
GO:0071346	cellular response to interferon-gamma	biological_process	8	0.0061243	ENSRNOG00000000239	Ccl7	C-C motif chemokine ligand 7 [Source:RGD Symbol;Acc:1359152]	14.4232	11.1589	18.1968	0.371988	1.4184	3.33763	8.53719	3.09376	up
GO:0071346	cellular response to interferon-gamma	biological_process	8	0.0061243	ENSRNOG00000001926	Cldn1	claudin 1 [Source:RGD Symbol;Acc:68422]	0.854451	0.532531	0.439747	1.41622	1.43284	1.98282	0.378057	-1.40332	down
GO:0071346	cellular response to interferon-gamma	biological_process	8	0.0061243	ENSRNOG00000007159	Ccl2	C-C motif chemokine ligand 2 [Source:RGD Symbol;Acc:3645]	37.7066	18.9936	41.8423	1.13671	3.71253	3.7896	11.4069	3.51183	up
GO:0071346	cellular response to interferon-gamma	biological_process	8	0.0061243	ENSRNOG00000018991	Gsn	gelsolin [Source:RGD Symbol;Acc:1303089]	421.812	450.543	281.254	941.528	460.793	1133.21	0.454977	-1.13614	down
GO:0071346	cellular response to interferon-gamma	biological_process	8	0.0061243	ENSRNOG00000029768	Ccl12	chemokine (C-C motif) ligand 12 [Source:RGD Symbol;Acc:1309255]	6.0007	2.47451	2.57848	0.194217	0.89901	0.367082	7.56941	2.92018	up
GO:0020037	heme binding	molecular_function	6	0.00626681	ENSRNOG00000012458	Cyp2e1	cytochrome P450, family 2, subfamily e, polypeptide 1 [Source:RGD Symbol;Acc:2475]	1.59029	2.0422	0.503894	5.70974	4.74285	4.83838	0.270512	-1.88624	down
GO:0020037	heme binding	molecular_function	6	0.00626681	ENSRNOG00000014117	Hmox1	heme oxygenase 1 [Source:RGD Symbol;Acc:2806]	551.077	151.281	396.168	31.9406	70.2869	56.3487	6.92743	2.79232	up
GO:0020037	heme binding	molecular_function	6	0.00626681	ENSRNOG00000019500	Cyp1a1	cytochrome P450, family 1, subfamily a, polypeptide 1 [Source:RGD Symbol;Acc:2458]	3.79747	8.76837	3.6107	28.2685	25.6761	8.90865	0.25737	-1.95808	down
GO:0020037	heme binding	molecular_function	6	0.00626681	ENSRNOG00000028891	Cyp2t1	cytochrome P450, family 2, subfamily t, polypeptide 1 [Source:RGD Symbol;Acc:620086]	2.88466	3.24066	2.34437	4.17459	4.32691	8.6706	0.493224	-1.01969	down
GO:0020037	heme binding	molecular_function	6	0.00626681	ENSRNOG00000032261	Cyp2d4	cytochrome P450, family 2, subfamily d, polypeptide 4 [Source:RGD Symbol;Acc:620640]	3.90219	4.53709	2.88962	9.25606	7.48095	6.29301	0.491919	-1.02351	down
GO:0020037	heme binding	molecular_function	6	0.00626681	ENSRNOG00000045989	Hba-a3	hemoglobin alpha, adult chain 3 [Source:RGD Symbol;Acc:1359209]	29.1036	33.0564	24.4265	54.478	69.3314	104.209	0.379734	-1.39694	down
GO:0020037	heme binding	molecular_function	6	0.00626681	ENSRNOG00000047321	Hba-a2	hemoglobin alpha, adult chain 2 [Source:RGD Symbol;Acc:1359364]	622.608	817.629	600.355	1003.7	1375.98	1844.64	0.483058	-1.04973	down
GO:0005604	basement membrane	cellular_component	6	0.00646053	ENSRNOG00000002053	Fras1	Fraser extracellular matrix complex subunit 1 [Source:RGD Symbol;Acc:1306516]	2.36999	3.21564	1.80956	6.31625	6.67886	2.69939	0.471197	-1.0856	down
GO:0005604	basement membrane	cellular_component	6	0.00646053	ENSRNOG00000010208	Timp1	TIMP metallopeptidase inhibitor 1 [Source:RGD Symbol;Acc:621675]	191.725	124.836	377.443	58.9436	79.8218	69.1842	3.33737	1.73871	up
GO:0005604	basement membrane	cellular_component	6	0.00646053	ENSRNOG00000010529	Thbs2	thrombospondin 2 [Source:RGD Symbol;Acc:1310979]	16.9175	9.7328	15.9974	2.57939	6.01878	6.82916	2.76443	1.46698	up
GO:0005604	basement membrane	cellular_component	6	0.00646053	ENSRNOG00000058645	Tnc	tenascin C [Source:RGD Symbol;Acc:621057]	32.8819	24.6221	38.6851	10.8562	17.6057	12.6766	2.33817	1.22538	up
GO:0005604	basement membrane	cellular_component	6	0.00646053	ENSRNOG00000059507	Lamc3	laminin subunit gamma 3 [Source:RGD Symbol;Acc:1309399]	0.642198	0.669721	0.48091	3.66613	1.70261	2.05931	0.241359	-2.05075	down
GO:0060135	maternal process involved in female pregnancy	biological_process	5	0.00656867	ENSRNOG00000007002	Lif	LIF, interleukin 6 family cytokine [Source:RGD Symbol;Acc:620865]	2.79472	2.7336	5.46239	0.880568	1.01865	1.04408	3.73414	1.90078	up
GO:0060135	maternal process involved in female pregnancy	biological_process	5	0.00656867	ENSRNOG00000007159	Ccl2	C-C motif chemokine ligand 2 [Source:RGD Symbol;Acc:3645]	37.7066	18.9936	41.8423	1.13671	3.71253	3.7896	11.4069	3.51183	up
GO:0060135	maternal process involved in female pregnancy	biological_process	5	0.00656867	ENSRNOG00000013304	Arg1	arginase 1 [Source:RGD Symbol;Acc:2150]	38.2968	26.0177	49.9768	8.35733	12.4054	14.4375	3.24689	1.69906	up
GO:0042738	exogenous drug catabolic process	biological_process	7	0.00656867	ENSRNOG00000012458	Cyp2e1	cytochrome P450, family 2, subfamily e, polypeptide 1 [Source:RGD Symbol;Acc:2475]	1.59029	2.0422	0.503894	5.70974	4.74285	4.83838	0.270512	-1.88624	down
GO:0042738	exogenous drug catabolic process	biological_process	7	0.00656867	ENSRNOG00000028891	Cyp2t1	cytochrome P450, family 2, subfamily t, polypeptide 1 [Source:RGD Symbol;Acc:620086]	2.88466	3.24066	2.34437	4.17459	4.32691	8.6706	0.493224	-1.01969	down
GO:0042738	exogenous drug catabolic process	biological_process	7	0.00656867	ENSRNOG00000032261	Cyp2d4	cytochrome P450, family 2, subfamily d, polypeptide 4 [Source:RGD Symbol;Acc:620640]	3.90219	4.53709	2.88962	9.25606	7.48095	6.29301	0.491919	-1.02351	down
GO:0008201	heparin binding	molecular_function	6	0.00687677	ENSRNOG00000000239	Ccl7	C-C motif chemokine ligand 7 [Source:RGD Symbol;Acc:1359152]	14.4232	11.1589	18.1968	0.371988	1.4184	3.33763	8.53719	3.09376	up
GO:0008201	heparin binding	molecular_function	6	0.00687677	ENSRNOG00000002794	Selp	selectin P [Source:RGD Symbol;Acc:3656]	3.596	2.43421	6.01392	0.725463	1.69202	1.63187	2.97434	1.57257	up
GO:0008201	heparin binding	molecular_function	6	0.00687677	ENSRNOG00000007159	Ccl2	C-C motif chemokine ligand 2 [Source:RGD Symbol;Acc:3645]	37.7066	18.9936	41.8423	1.13671	3.71253	3.7896	11.4069	3.51183	up
GO:0008201	heparin binding	molecular_function	6	0.00687677	ENSRNOG00000045684	LOC100910978	extracellular matrix protein 2-like [Source:RGD Symbol;Acc:6495594]	2.20831	2.37103	1.28465	3.92303	4.91467	5.89374	0.39806	-1.32894	down
GO:0008201	heparin binding	molecular_function	6	0.00687677	ENSRNOG00000045829	Thbs1	thrombospondin 1 [Source:RGD Symbol;Acc:1588455]	69.4641	106.372	164.303	44.915	55.3273	28.7153	2.6376	1.39923	up
GO:0008201	heparin binding	molecular_function	6	0.00687677	ENSRNOG00000046848	PCOLCE2	procollagen C-endopeptidase enhancer 2 [Source:RGD Symbol;Acc:1595195]	5.81048	6.81291	4.70162	14.6357	10.3164	26.2067	0.338652	-1.56212	down
GO:0005044	scavenger receptor activity	molecular_function	4	0.00691359	ENSRNOG00000002302	Corin	corin, serine peptidase [Source:RGD Symbol;Acc:727887]	0.106521	0.316943	0.05572	0.485884	0.896918	1.82259	0.149493	-2.74185	down
GO:0005044	scavenger receptor activity	molecular_function	4	0.00691359	ENSRNOG00000012779	Msr1	macrophage scavenger receptor 1 [Source:RGD Symbol;Acc:1564316]	12.1959	9.51486	9.14382	4.2104	4.34232	6.3628	2.06862	1.04867	up
GO:0005044	scavenger receptor activity	molecular_function	4	0.00691359	ENSRNOG00000019622	Ackr3	atypical chemokine receptor 3 [Source:RGD Symbol;Acc:620601]	76.304	96.1834	133.552	44.5313	43.6139	45.7138	2.28628	1.193	up
GO:0005044	scavenger receptor activity	molecular_function	4	0.00691359	ENSRNOG00000049303	Marco	macrophage receptor with collagenous structure [Source:RGD Symbol;Acc:1589662]	0.632275	0.603204	0.631253	0	0	0	6222.44	12.6033	up
GO:0050840	extracellular matrix binding	molecular_function	4	0.00730958	ENSRNOG00000014350	Ccn1	cellular communication network factor 1 [Source:RGD Symbol;Acc:620763]	80.4142	168.259	87.5866	30.0122	51.2155	26.7196	3.11503	1.63925	up
GO:0050840	extracellular matrix binding	molecular_function	4	0.00730958	ENSRNOG00000029903	Spock3	SPARC/osteonectin, cwcv and kazal like domains proteoglycan 3 [Source:RGD Symbol;Acc:1305672]	0.278628	0.812314	0.4091	1.92492	1.27859	1.12195	0.346794	-1.52785	down
GO:0050840	extracellular matrix binding	molecular_function	4	0.00730958	ENSRNOG00000045829	Thbs1	thrombospondin 1 [Source:RGD Symbol;Acc:1588455]	69.4641	106.372	164.303	44.915	55.3273	28.7153	2.6376	1.39923	up
GO:0045777	positive regulation of blood pressure	biological_process	6	0.00730958	ENSRNOG00000004400	Avpr1a	arginine vasopressin receptor 1A [Source:RGD Symbol;Acc:2185]	0.884247	0.991065	0.583946	1.63749	2.34024	1.80556	0.425235	-1.23367	down
GO:0045777	positive regulation of blood pressure	biological_process	6	0.00730958	ENSRNOG00000013887	Adra2b	adrenoceptor alpha 2B [Source:RGD Symbol;Acc:2057]	0.323727	0.349478	0.234101	1.5404	0.988549	0.490279	0.300509	-1.73452	down
GO:0045777	positive regulation of blood pressure	biological_process	6	0.00730958	ENSRNOG00000018606	Olr59	olfactory receptor 59 [Source:RGD Symbol;Acc:628858]	1.22605	1.00656	1.51125	0.528759	0.534917	0.739663	2.07607	1.05386	up
GO:0003143	embryonic heart tube morphogenesis	biological_process	6	0.00740571	ENSRNOG00000016181	Tbx20	T-box 20 [Source:RGD Symbol;Acc:1309396]	0	0	0	0	0	0.778032	0.000385588	-11.3407	down
GO:0003143	embryonic heart tube morphogenesis	biological_process	6	0.00740571	ENSRNOG00000017060	Ryr2	ryanodine receptor 2 [Source:RGD Symbol;Acc:620314]	0.186399	0.211602	0.108926	0.285075	0.300051	1.47817	0.245687	-2.0251	down
GO:0085029	extracellular matrix assembly	biological_process	6	0.00740571	ENSRNOG00000004854	Has2	hyaluronan synthase 2 [Source:RGD Symbol;Acc:2781]	0.632455	0.404069	0.485014	0.116629	0.11933	0.20685	3.4361	1.78077	up
GO:0085029	extracellular matrix assembly	biological_process	6	0.00740571	ENSRNOG00000010994	Has1	hyaluronan synthase 1 [Source:RGD Symbol;Acc:708528]	2.04263	1.86301	4.06113	0.791237	1.41846	0.81575	2.63326	1.39685	up
GO:0009404	toxin metabolic process	biological_process	5	0.00740571	ENSRNOG00000003510	Fmo2	flavin containing dimethylaniline monoxygenase 2 [Source:RGD Symbol;Acc:628600]	36.2628	40.8993	13.9322	160.378	105.178	155.493	0.216351	-2.20855	down
GO:0009404	toxin metabolic process	biological_process	5	0.00740571	ENSRNOG00000019500	Cyp1a1	cytochrome P450, family 1, subfamily a, polypeptide 1 [Source:RGD Symbol;Acc:2458]	3.79747	8.76837	3.6107	28.2685	25.6761	8.90865	0.25737	-1.95808	down
GO:0036376	sodium ion export across plasma membrane	biological_process	11	0.00740571	ENSRNOG00000007290	Atp1a2	ATPase Na+/K+ transporting subunit alpha 2 [Source:RGD Symbol;Acc:2168]	1.11361	2.2107	0.439613	6.02731	3.2216	13.5037	0.165429	-2.59572	down
GO:0036376	sodium ion export across plasma membrane	biological_process	11	0.00740571	ENSRNOG00000020263	Atp1a3	ATPase Na+/K+ transporting subunit alpha 3 [Source:RGD Symbol;Acc:2169]	1.61757	1.90245	1.13016	0.671541	0.692308	0.956255	2.0043	1.0031	up
GO:0031748	D1 dopamine receptor binding	molecular_function	8	0.00740571	ENSRNOG00000020263	Atp1a3	ATPase Na+/K+ transporting subunit alpha 3 [Source:RGD Symbol;Acc:2169]	1.61757	1.90245	1.13016	0.671541	0.692308	0.956255	2.0043	1.0031	up
GO:0031748	D1 dopamine receptor binding	molecular_function	8	0.00740571	ENSRNOG00000028404	Ppp1r1b	protein phosphatase 1, regulatory (inhibitor) subunit 1B [Source:RGD Symbol;Acc:621859]	7.76903	6.02664	5.6708	22.4231	7.67647	15.2862	0.428911	-1.22125	down
GO:0010226	response to lithium ion	biological_process	7	0.00740571	ENSRNOG00000017786	Acta1	actin, alpha 1, skeletal muscle [Source:RGD Symbol;Acc:2025]	9.08505	7.68911	17.567	2.06127	3.95623	4.72239	3.19753	1.67696	up
GO:0010226	response to lithium ion	biological_process	7	0.00740571	ENSRNOG00000059479	Adcy1	adenylate cyclase 1 [Source:RGD Symbol;Acc:1309318]	0.206208	0.356452	0.124273	1.21653	0.813194	0.51294	0.270163	-1.8881	down
GO:0003016	respiratory system process	biological_process	5	0.00740571	ENSRNOG00000019433	Rab3a	RAB3A, member RAS oncogene family [Source:RGD Symbol;Acc:3528]	5.25359	6.66674	3.95532	13.6283	11.8968	8.19245	0.470843	-1.08668	down
GO:0003016	respiratory system process	biological_process	5	0.00740571	ENSRNOG00000019447	Ecel1	endothelin converting enzyme-like 1 [Source:RGD Symbol;Acc:61806]	0.125468	0.19421	0.117384	0.016767	0	0.013718	14.337	3.84167	up
GO:0047023	androsterone dehydrogenase activity	molecular_function	7	0.00740571	ENSRNOG00000038319	Akr1c19	aldo-keto reductase family 1, member C19 [Source:RGD Symbol;Acc:1562954]	4.58014	5.43589	2.94887	7.99767	9.39868	9.74826	0.477623	-1.06605	down
GO:0047023	androsterone dehydrogenase activity	molecular_function	7	0.00740571	ENSRNOG00000058568	Dhrs9	dehydrogenase/reductase 9 [Source:RGD Symbol;Acc:620655]	9.49096	6.67188	18.1665	1.17878	2.82958	3.45117	4.60207	2.20228	up
GO:0005833	hemoglobin complex	cellular_component	4	0.00740571	ENSRNOG00000045989	Hba-a3	hemoglobin alpha, adult chain 3 [Source:RGD Symbol;Acc:1359209]	29.1036	33.0564	24.4265	54.478	69.3314	104.209	0.379734	-1.39694	down
GO:0005833	hemoglobin complex	cellular_component	4	0.00740571	ENSRNOG00000047321	Hba-a2	hemoglobin alpha, adult chain 2 [Source:RGD Symbol;Acc:1359364]	622.608	817.629	600.355	1003.7	1375.98	1844.64	0.483058	-1.04973	down
GO:0045080	positive regulation of chemokine biosynthetic process	biological_process	9	0.00740571	ENSRNOG00000004649	Il1b	interleukin 1 beta [Source:RGD Symbol;Acc:2891]	17.0922	15.7097	15.266	6.22867	5.3594	4.98742	2.89994	1.53602	up
GO:0045080	positive regulation of chemokine biosynthetic process	biological_process	9	0.00740571	ENSRNOG00000019422	Egr1	early growth response 1 [Source:RGD Symbol;Acc:2544]	28.8778	81.6766	49.115	5.6807	12.1778	9.44428	5.8481	2.54797	up
GO:0042383	sarcolemma	cellular_component	5	0.00754662	ENSRNOG00000002372	Sgcd	sarcoglycan, delta [Source:RGD Symbol;Acc:1306638]	0.93466	1.49454	1.00184	2.76866	3.11875	2.25635	0.421309	-1.24705	down
GO:0042383	sarcolemma	cellular_component	5	0.00754662	ENSRNOG00000007290	Atp1a2	ATPase Na+/K+ transporting subunit alpha 2 [Source:RGD Symbol;Acc:2168]	1.11361	2.2107	0.439613	6.02731	3.2216	13.5037	0.165429	-2.59572	down
GO:0042383	sarcolemma	cellular_component	5	0.00754662	ENSRNOG00000009779	Krt8	keratin 8 [Source:RGD Symbol;Acc:2984]	228.699	182.557	395.575	110.026	131.871	138.388	2.12165	1.08519	up
GO:0042383	sarcolemma	cellular_component	5	0.00754662	ENSRNOG00000019183	Alox15	arachidonate 15-lipoxygenase [Source:RGD Symbol;Acc:70493]	3.17012	1.75927	2.65063	3.59856	4.73835	17.0034	0.299129	-1.74116	down
GO:0042383	sarcolemma	cellular_component	5	0.00754662	ENSRNOG00000020263	Atp1a3	ATPase Na+/K+ transporting subunit alpha 3 [Source:RGD Symbol;Acc:2169]	1.61757	1.90245	1.13016	0.671541	0.692308	0.956255	2.0043	1.0031	up
GO:0002020	protease binding	molecular_function	6	0.00793525	ENSRNOG00000001414	Serpine1	serpin family E member 1 [Source:RGD Symbol;Acc:3249]	55.409	67.7847	164.683	17.9559	19.5535	21.1919	4.90409	2.29399	up
GO:0002020	protease binding	molecular_function	6	0.00793525	ENSRNOG00000003538	Adamts4	ADAM metallopeptidase with thrombospondin type 1 motif, 4 [Source:RGD Symbol;Acc:621242]	1.18108	1.04194	1.92092	0.333219	0.394028	0.42186	3.60623	1.85049	up
GO:0002020	protease binding	molecular_function	6	0.00793525	ENSRNOG00000010208	Timp1	TIMP metallopeptidase inhibitor 1 [Source:RGD Symbol;Acc:621675]	191.725	124.836	377.443	58.9436	79.8218	69.1842	3.33737	1.73871	up
GO:0002020	protease binding	molecular_function	6	0.00793525	ENSRNOG00000011800	F3	coagulation factor III, tissue factor [Source:RGD Symbol;Acc:2587]	167.292	169.907	352.923	78.9706	86.6779	136.29	2.28564	1.1926	up
GO:0002020	protease binding	molecular_function	6	0.00793525	ENSRNOG00000013973	Lcn2	lipocalin 2 [Source:RGD Symbol;Acc:69408]	1594.83	895.005	2315.86	399.193	738.611	424.407	3.07622	1.62116	up
GO:0034612	response to tumor necrosis factor	biological_process	7	0.00809798	ENSRNOG00000007159	Ccl2	C-C motif chemokine ligand 2 [Source:RGD Symbol;Acc:3645]	37.7066	18.9936	41.8423	1.13671	3.71253	3.7896	11.4069	3.51183	up
GO:0034612	response to tumor necrosis factor	biological_process	7	0.00809798	ENSRNOG00000011039	Gch1	GTP cyclohydrolase 1 [Source:RGD Symbol;Acc:61992]	24.2456	21.4661	37.719	10.8419	15.8192	13.7037	2.06692	1.04748	up
GO:0034612	response to tumor necrosis factor	biological_process	7	0.00809798	ENSRNOG00000018830	Aff3	AF4/FMR2 family, member 3 [Source:RGD Symbol;Acc:1308527]	1.8427	2.20691	1.43681	4.81985	3.16028	3.06711	0.496632	-1.00975	down
GO:0010951	negative regulation of endopeptidase activity	biological_process	11	0.0084381	ENSRNOG00000001414	Serpine1	serpin family E member 1 [Source:RGD Symbol;Acc:3249]	55.409	67.7847	164.683	17.9559	19.5535	21.1919	4.90409	2.29399	up
GO:0010951	negative regulation of endopeptidase activity	biological_process	11	0.0084381	ENSRNOG00000002640	Serpinb5	serpin family B member 5 [Source:RGD Symbol;Acc:69342]	0	0	0	0	0	0.922211	0.000325305	-11.5859	down
GO:0010951	negative regulation of endopeptidase activity	biological_process	11	0.0084381	ENSRNOG00000005178	LOC689081	similar to cystatin E2 [Source:RGD Symbol;Acc:1597405]	0	0	0	0.273211	0.58523	0.12532	0.000304952	-11.6791	down
GO:0010951	negative regulation of endopeptidase activity	biological_process	11	0.0084381	ENSRNOG00000010208	Timp1	TIMP metallopeptidase inhibitor 1 [Source:RGD Symbol;Acc:621675]	191.725	124.836	377.443	58.9436	79.8218	69.1842	3.33737	1.73871	up
GO:0010951	negative regulation of endopeptidase activity	biological_process	11	0.0084381	ENSRNOG00000010513	Tfpi2	tissue factor pathway inhibitor 2 [Source:RGD Symbol;Acc:628629]	2.00105	1.77887	4.74033	0.303871	0.748737	1.02747	4.09613	2.03426	up
GO:0010951	negative regulation of endopeptidase activity	biological_process	11	0.0084381	ENSRNOG00000049614	AABR07028488		0.35126	0.524043	0.288915	0.939791	0.51385	7.48834	0.130197	-2.94123	down
GO:0005102	signaling receptor binding	molecular_function	5	0.00874693	ENSRNOG00000001414	Serpine1	serpin family E member 1 [Source:RGD Symbol;Acc:3249]	55.409	67.7847	164.683	17.9559	19.5535	21.1919	4.90409	2.29399	up
GO:0005102	signaling receptor binding	molecular_function	5	0.00874693	ENSRNOG00000004473	Ppargc1a	PPARG coactivator 1 alpha [Source:RGD Symbol;Acc:620925]	0.699099	0.733841	0.380414	1.53806	1.6784	1.50382	0.384163	-1.38021	down
GO:0005102	signaling receptor binding	molecular_function	5	0.00874693	ENSRNOG00000006569	Itgb8	integrin subunit beta 8 [Source:RGD Symbol;Acc:1311374]	2.69064	1.81036	3.42008	0.970632	0.984076	0.573387	3.13322	1.64765	up
GO:0005102	signaling receptor binding	molecular_function	5	0.00874693	ENSRNOG00000007002	Lif	LIF, interleukin 6 family cytokine [Source:RGD Symbol;Acc:620865]	2.79472	2.7336	5.46239	0.880568	1.01865	1.04408	3.73414	1.90078	up
GO:0005102	signaling receptor binding	molecular_function	5	0.00874693	ENSRNOG00000008176	Nppa	natriuretic peptide A [Source:RGD Symbol;Acc:3193]	0	0	0	0	0	4.77912	6.27731e-05	-13.9595	down
GO:0005102	signaling receptor binding	molecular_function	5	0.00874693	ENSRNOG00000010278	Il6	interleukin 6 [Source:RGD Symbol;Acc:2901]	3.16485	2.11915	11.0231	0.105601	0.098662	0.045109	65.3927	6.03106	up
GO:0005102	signaling receptor binding	molecular_function	5	0.00874693	ENSRNOG00000014320	Inhba	inhibin subunit beta A [Source:RGD Symbol;Acc:62074]	1.43305	0.871656	0.743097	0.137745	0.416838	0.219709	3.93625	1.97682	up
GO:0005102	signaling receptor binding	molecular_function	5	0.00874693	ENSRNOG00000025074	Fgg	fibrinogen gamma chain [Source:RGD Symbol;Acc:2613]	127.794	78.6948	180.988	61.9913	70.073	37.5544	2.2844	1.19181	up
GO:0005102	signaling receptor binding	molecular_function	5	0.00874693	ENSRNOG00000050998	AABR07044397		0	0	0	0	10.0785	0	2.97664e-05	-15.036	down
GO:0005102	signaling receptor binding	molecular_function	5	0.00874693	ENSRNOG00000059857	Rnd1	Rho family GTPase 1 [Source:RGD Symbol;Acc:1306338]	27.5036	15.5245	33.0023	7.92626	8.32134	9.04674	3.00583	1.58776	up
GO:0050796	regulation of insulin secretion	biological_process	10	0.00893451	ENSRNOG00000004649	Il1b	interleukin 1 beta [Source:RGD Symbol;Acc:2891]	17.0922	15.7097	15.266	6.22867	5.3594	4.98742	2.89994	1.53602	up
GO:0050796	regulation of insulin secretion	biological_process	10	0.00893451	ENSRNOG00000014448	Arntl	aryl hydrocarbon receptor nuclear translocator-like [Source:RGD Symbol;Acc:62003]	7.69285	5.52374	7.07682	4.26659	2.17754	3.16265	2.1124	1.07889	up
GO:0050796	regulation of insulin secretion	biological_process	10	0.00893451	ENSRNOG00000020254	Per2	period circadian regulator 2 [Source:RGD Symbol;Acc:61945]	5.08553	8.59563	7.97541	10.986	14.3571	23.4713	0.443651	-1.1725	down
GO:0097066	response to thyroid hormone	biological_process	6	0.00916679	ENSRNOG00000004473	Ppargc1a	PPARG coactivator 1 alpha [Source:RGD Symbol;Acc:620925]	0.699099	0.733841	0.380414	1.53806	1.6784	1.50382	0.384163	-1.38021	down
GO:0097066	response to thyroid hormone	biological_process	6	0.00916679	ENSRNOG00000051158	Cfb	complement factor B [Source:RGD Symbol;Acc:2204]	504.105	354.647	440.239	134.428	208.694	220.508	2.30469	1.20457	up
GO:0005890	sodium:potassium-exchanging ATPase complex	cellular_component	8	0.00916679	ENSRNOG00000007290	Atp1a2	ATPase Na+/K+ transporting subunit alpha 2 [Source:RGD Symbol;Acc:2168]	1.11361	2.2107	0.439613	6.02731	3.2216	13.5037	0.165429	-2.59572	down
GO:0005890	sodium:potassium-exchanging ATPase complex	cellular_component	8	0.00916679	ENSRNOG00000020263	Atp1a3	ATPase Na+/K+ transporting subunit alpha 3 [Source:RGD Symbol;Acc:2169]	1.61757	1.90245	1.13016	0.671541	0.692308	0.956255	2.0043	1.0031	up
GO:0010248	establishment or maintenance of transmembrane electrochemical gradient	biological_process	8	0.00916679	ENSRNOG00000007290	Atp1a2	ATPase Na+/K+ transporting subunit alpha 2 [Source:RGD Symbol;Acc:2168]	1.11361	2.2107	0.439613	6.02731	3.2216	13.5037	0.165429	-2.59572	down
GO:0010248	establishment or maintenance of transmembrane electrochemical gradient	biological_process	8	0.00916679	ENSRNOG00000020263	Atp1a3	ATPase Na+/K+ transporting subunit alpha 3 [Source:RGD Symbol;Acc:2169]	1.61757	1.90245	1.13016	0.671541	0.692308	0.956255	2.0043	1.0031	up
GO:0005149	interleukin-1 receptor binding	molecular_function	7	0.00916679	ENSRNOG00000004649	Il1b	interleukin 1 beta [Source:RGD Symbol;Acc:2891]	17.0922	15.7097	15.266	6.22867	5.3594	4.98742	2.89994	1.53602	up
GO:0005149	interleukin-1 receptor binding	molecular_function	7	0.00916679	ENSRNOG00000005871	Il1rn	interleukin 1 receptor antagonist [Source:RGD Symbol;Acc:621159]	38.7998	25.085	37.5114	15.4297	14.5177	9.55624	2.56675	1.35995	up
GO:0030206	chondroitin sulfate biosynthetic process	biological_process	9	0.00916679	ENSRNOG00000000572	Chst3	carbohydrate sulfotransferase 3 [Source:RGD Symbol;Acc:620355]	1.49077	2.27646	1.31024	4.70228	4.76565	2.85126	0.412159	-1.27873	down
GO:0030206	chondroitin sulfate biosynthetic process	biological_process	9	0.00916679	ENSRNOG00000025930	Chst13	carbohydrate sulfotransferase 13 [Source:RGD Symbol;Acc:1562825]	0.338249	0.526967	0.373033	4.52184	1.85475	0.587228	0.177812	-2.49158	down
GO:0046888	negative regulation of hormone secretion	biological_process	8	0.00916679	ENSRNOG00000007002	Lif	LIF, interleukin 6 family cytokine [Source:RGD Symbol;Acc:620865]	2.79472	2.7336	5.46239	0.880568	1.01865	1.04408	3.73414	1.90078	up
GO:0046888	negative regulation of hormone secretion	biological_process	8	0.00916679	ENSRNOG00000010278	Il6	interleukin 6 [Source:RGD Symbol;Acc:2901]	3.16485	2.11915	11.0231	0.105601	0.098662	0.045109	65.3927	6.03106	up
GO:0071383	cellular response to steroid hormone stimulus	biological_process	7	0.00916679	ENSRNOG00000007290	Atp1a2	ATPase Na+/K+ transporting subunit alpha 2 [Source:RGD Symbol;Acc:2168]	1.11361	2.2107	0.439613	6.02731	3.2216	13.5037	0.165429	-2.59572	down
GO:0071383	cellular response to steroid hormone stimulus	biological_process	7	0.00916679	ENSRNOG00000014481	Adtrp	androgen-dependent TFPI-regulating protein [Source:RGD Symbol;Acc:1305679]	4.99979	4.28189	7.60994	2.40931	3.24639	2.70577	2.02017	1.01448	up
GO:0045475	locomotor rhythm	biological_process	5	0.00916679	ENSRNOG00000006663	Usp2	ubiquitin specific peptidase 2 [Source:RGD Symbol;Acc:621073]	1.18283	1.2068	0.978434	2.11364	2.35493	3.93105	0.400979	-1.3184	down
GO:0045475	locomotor rhythm	biological_process	5	0.00916679	ENSRNOG00000019422	Egr1	early growth response 1 [Source:RGD Symbol;Acc:2544]	28.8778	81.6766	49.115	5.6807	12.1778	9.44428	5.8481	2.54797	up
GO:0097284	hepatocyte apoptotic process	biological_process	8	0.00916679	ENSRNOG00000009779	Krt8	keratin 8 [Source:RGD Symbol;Acc:2984]	228.699	182.557	395.575	110.026	131.871	138.388	2.12165	1.08519	up
GO:0097284	hepatocyte apoptotic process	biological_process	8	0.00916679	ENSRNOG00000018991	Gsn	gelsolin [Source:RGD Symbol;Acc:1303089]	421.812	450.543	281.254	941.528	460.793	1133.21	0.454977	-1.13614	down
GO:0006919	activation of cysteine-type endopeptidase activity involved in apoptotic process	biological_process	11	0.00959279	ENSRNOG00000008656	Snca	synuclein alpha [Source:RGD Symbol;Acc:3729]	0.033831	0	0.067124	0.192924	0.624332	0.823897	0.0615147	-4.02293	down
GO:0006919	activation of cysteine-type endopeptidase activity involved in apoptotic process	biological_process	11	0.00959279	ENSRNOG00000011483	S100a9	S100 calcium binding protein A9 [Source:RGD Symbol;Acc:620267]	111.507	62.986	76.8319	20.221	25.7548	22.6237	3.66366	1.87329	up
GO:0006919	activation of cysteine-type endopeptidase activity involved in apoptotic process	biological_process	11	0.00959279	ENSRNOG00000011557	S100a8	S100 calcium binding protein A8 [Source:RGD Symbol;Acc:620265]	58.764	26.4357	40.8193	6.86219	14.8878	7.83776	4.25916	2.09057	up
GO:0006919	activation of cysteine-type endopeptidase activity involved in apoptotic process	biological_process	11	0.00959279	ENSRNOG00000011800	F3	coagulation factor III, tissue factor [Source:RGD Symbol;Acc:2587]	167.292	169.907	352.923	78.9706	86.6779	136.29	2.28564	1.1926	up
GO:0071276	cellular response to cadmium ion	biological_process	8	0.00981978	ENSRNOG00000014117	Hmox1	heme oxygenase 1 [Source:RGD Symbol;Acc:2806]	551.077	151.281	396.168	31.9406	70.2869	56.3487	6.92743	2.79232	up
GO:0071276	cellular response to cadmium ion	biological_process	8	0.00981978	ENSRNOG00000018991	Gsn	gelsolin [Source:RGD Symbol;Acc:1303089]	421.812	450.543	281.254	941.528	460.793	1133.21	0.454977	-1.13614	down
GO:0071276	cellular response to cadmium ion	biological_process	8	0.00981978	ENSRNOG00000043098	Mt2A	metallothionein 2A [Source:RGD Symbol;Acc:1592345]	46.8268	38.1857	98.9606	22.5488	25.925	34.0743	2.22868	1.15619	up
GO:0045944	positive regulation of transcription by RNA polymerase II	biological_process	10	0.0104993	ENSRNOG00000000640	Egr2	early growth response 2 [Source:RGD Symbol;Acc:621608]	3.15739	6.1992	6.47142	1.3654	1.96587	0.959568	3.68879	1.88315	up
GO:0045944	positive regulation of transcription by RNA polymerase II	biological_process	10	0.0104993	ENSRNOG00000002456	Hlf	HLF transcription factor, PAR bZIP family member [Source:RGD Symbol;Acc:1582828]	2.24187	2.70773	1.96198	5.66715	7.0465	4.85039	0.393508	-1.34554	down
GO:0045944	positive regulation of transcription by RNA polymerase II	biological_process	10	0.0104993	ENSRNOG00000003745	Atf3	activating transcription factor 3 [Source:RGD Symbol;Acc:2165]	10.4013	37.4337	46.2986	3.78197	4.08518	7.17428	6.25829	2.64577	up
GO:0045944	positive regulation of transcription by RNA polymerase II	biological_process	10	0.0104993	ENSRNOG00000004473	Ppargc1a	PPARG coactivator 1 alpha [Source:RGD Symbol;Acc:620925]	0.699099	0.733841	0.380414	1.53806	1.6784	1.50382	0.384163	-1.38021	down
GO:0045944	positive regulation of transcription by RNA polymerase II	biological_process	10	0.0104993	ENSRNOG00000004537	Rxrg	retinoid X receptor gamma [Source:RGD Symbol;Acc:620046]	0.784535	1.26834	0.531943	2.96272	1.86653	2.04611	0.375954	-1.41137	down
GO:0045944	positive regulation of transcription by RNA polymerase II	biological_process	10	0.0104993	ENSRNOG00000004649	Il1b	interleukin 1 beta [Source:RGD Symbol;Acc:2891]	17.0922	15.7097	15.266	6.22867	5.3594	4.98742	2.89994	1.53602	up
GO:0045944	positive regulation of transcription by RNA polymerase II	biological_process	10	0.0104993	ENSRNOG00000007002	Lif	LIF, interleukin 6 family cytokine [Source:RGD Symbol;Acc:620865]	2.79472	2.7336	5.46239	0.880568	1.01865	1.04408	3.73414	1.90078	up
GO:0045944	positive regulation of transcription by RNA polymerase II	biological_process	10	0.0104993	ENSRNOG00000010278	Il6	interleukin 6 [Source:RGD Symbol;Acc:2901]	3.16485	2.11915	11.0231	0.105601	0.098662	0.045109	65.3927	6.03106	up
GO:0045944	positive regulation of transcription by RNA polymerase II	biological_process	10	0.0104993	ENSRNOG00000013074	Wt1	WT1 transcription factor [Source:RGD Symbol;Acc:3974]	6.51322	3.77358	7.11635	1.80892	3.61924	2.35499	2.236	1.16092	up
GO:0045944	positive regulation of transcription by RNA polymerase II	biological_process	10	0.0104993	ENSRNOG00000014320	Inhba	inhibin subunit beta A [Source:RGD Symbol;Acc:62074]	1.43305	0.871656	0.743097	0.137745	0.416838	0.219709	3.93625	1.97682	up
GO:0045944	positive regulation of transcription by RNA polymerase II	biological_process	10	0.0104993	ENSRNOG00000014350	Ccn1	cellular communication network factor 1 [Source:RGD Symbol;Acc:620763]	80.4142	168.259	87.5866	30.0122	51.2155	26.7196	3.11503	1.63925	up
GO:0045944	positive regulation of transcription by RNA polymerase II	biological_process	10	0.0104993	ENSRNOG00000014448	Arntl	aryl hydrocarbon receptor nuclear translocator-like [Source:RGD Symbol;Acc:62003]	7.69285	5.52374	7.07682	4.26659	2.17754	3.16265	2.1124	1.07889	up
GO:0045944	positive regulation of transcription by RNA polymerase II	biological_process	10	0.0104993	ENSRNOG00000016181	Tbx20	T-box 20 [Source:RGD Symbol;Acc:1309396]	0	0	0	0	0	0.778032	0.000385588	-11.3407	down
GO:0045944	positive regulation of transcription by RNA polymerase II	biological_process	10	0.0104993	ENSRNOG00000017808	Klf15	Kruppel-like factor 15 [Source:RGD Symbol;Acc:70918]	4.0834	7.67358	3.25876	24.0662	14.6325	13.7301	0.286403	-1.80388	down
GO:0045944	positive regulation of transcription by RNA polymerase II	biological_process	10	0.0104993	ENSRNOG00000019383	Tef	TEF transcription factor, PAR bZIP family member [Source:RGD Symbol;Acc:3841]	23.7942	29.9373	18.417	43.5098	55.0498	60.271	0.454249	-1.13845	down
GO:0045944	positive regulation of transcription by RNA polymerase II	biological_process	10	0.0104993	ENSRNOG00000019422	Egr1	early growth response 1 [Source:RGD Symbol;Acc:2544]	28.8778	81.6766	49.115	5.6807	12.1778	9.44428	5.8481	2.54797	up
GO:0045944	positive regulation of transcription by RNA polymerase II	biological_process	10	0.0104993	ENSRNOG00000019587	Ptprn	protein tyrosine phosphatase, receptor type, N [Source:RGD Symbol;Acc:620777]	3.28822	1.58827	3.5683	0.404913	0.311202	1.36381	4.06013	2.02153	up
GO:0045944	positive regulation of transcription by RNA polymerase II	biological_process	10	0.0104993	ENSRNOG00000021027	Dbp	D-box binding PAR bZIP transcription factor [Source:RGD Symbol;Acc:2491]	8.27444	13.9751	6.57459	23.8057	42.1863	32.955	0.291308	-1.77938	down
GO:0045944	positive regulation of transcription by RNA polymerase II	biological_process	10	0.0104993	ENSRNOG00000028025	Aknad1	AKNA domain containing 1 [Source:RGD Symbol;Acc:1583957]	0	0	0	0.04777	0.160116	0.135858	0.000872743	-10.1622	down
GO:0045944	positive regulation of transcription by RNA polymerase II	biological_process	10	0.0104993	ENSRNOG00000028108	Cytl1	cytokine like 1 [Source:RGD Symbol;Acc:1561846]	8.96537	10.6967	4.90505	15.0077	11.8637	34.7568	0.398635	-1.32686	down
GO:0045944	positive regulation of transcription by RNA polymerase II	biological_process	10	0.0104993	ENSRNOG00000029980	Zbtb16	zinc finger and BTB domain containing 16 [Source:RGD Symbol;Acc:727921]	2.73773	1.60881	0.909087	49.7177	4.1456	27.6044	0.0645117	-3.95429	down
GO:0045944	positive regulation of transcription by RNA polymerase II	biological_process	10	0.0104993	ENSRNOG00000038909	Pou3f3	POU class 3 homeobox 3 [Source:RGD Symbol;Acc:619768]	0	1.4154	0	0	0	0	4718.01	12.204	up
GO:0045944	positive regulation of transcription by RNA polymerase II	biological_process	10	0.0104993	ENSRNOG00000042838	Junb	JunB proto-oncogene, AP-1 transcription factor subunit [Source:RGD Symbol;Acc:2944]	78.6986	148.666	117.666	59.4441	49.5459	34.9588	2.39689	1.26117	up
GO:0045944	positive regulation of transcription by RNA polymerase II	biological_process	10	0.0104993	ENSRNOG00000046667	Fosb	FosB proto-oncogene, AP-1 transcription factor subunit [Source:RGD Symbol;Acc:1308198]	4.40301	29.0803	28.1312	2.28038	1.38324	1.99461	10.8894	3.44485	up
GO:0070555	response to interleukin-1	biological_process	7	0.0107543	ENSRNOG00000002723	Sele	selectin E [Source:RGD Symbol;Acc:3654]	2.98187	1.19921	3.6168	0.148222	0.414433	0.461137	7.61667	2.92916	up
GO:0070555	response to interleukin-1	biological_process	7	0.0107543	ENSRNOG00000004649	Il1b	interleukin 1 beta [Source:RGD Symbol;Acc:2891]	17.0922	15.7097	15.266	6.22867	5.3594	4.98742	2.89994	1.53602	up
GO:0070555	response to interleukin-1	biological_process	7	0.0107543	ENSRNOG00000008656	Snca	synuclein alpha [Source:RGD Symbol;Acc:3729]	0.033831	0	0.067124	0.192924	0.624332	0.823897	0.0615147	-4.02293	down
GO:0097191	extrinsic apoptotic signaling pathway	biological_process	6	0.0107543	ENSRNOG00000003546	Tnfrsf12a	TNF receptor superfamily member 12A [Source:RGD Symbol;Acc:631329]	41.3385	35.8452	71.9517	13.9554	16.6142	17.2047	3.12167	1.64232	up
GO:0097191	extrinsic apoptotic signaling pathway	biological_process	6	0.0107543	ENSRNOG00000009779	Krt8	keratin 8 [Source:RGD Symbol;Acc:2984]	228.699	182.557	395.575	110.026	131.871	138.388	2.12165	1.08519	up
GO:0097191	extrinsic apoptotic signaling pathway	biological_process	6	0.0107543	ENSRNOG00000014320	Inhba	inhibin subunit beta A [Source:RGD Symbol;Acc:62074]	1.43305	0.871656	0.743097	0.137745	0.416838	0.219709	3.93625	1.97682	up
GO:0001938	positive regulation of endothelial cell proliferation	biological_process	9	0.0108292	ENSRNOG00000007159	Ccl2	C-C motif chemokine ligand 2 [Source:RGD Symbol;Acc:3645]	37.7066	18.9936	41.8423	1.13671	3.71253	3.7896	11.4069	3.51183	up
GO:0001938	positive regulation of endothelial cell proliferation	biological_process	9	0.0108292	ENSRNOG00000011800	F3	coagulation factor III, tissue factor [Source:RGD Symbol;Acc:2587]	167.292	169.907	352.923	78.9706	86.6779	136.29	2.28564	1.1926	up
GO:0001938	positive regulation of endothelial cell proliferation	biological_process	9	0.0108292	ENSRNOG00000013304	Arg1	arginase 1 [Source:RGD Symbol;Acc:2150]	38.2968	26.0177	49.9768	8.35733	12.4054	14.4375	3.24689	1.69906	up
GO:0001938	positive regulation of endothelial cell proliferation	biological_process	9	0.0108292	ENSRNOG00000015055	Scg2	secretogranin II [Source:RGD Symbol;Acc:3626]	0.035057	0.056805	0.033008	0.243826	0.147987	2.48424	0.0434172	-4.52559	down
GO:0048661	positive regulation of smooth muscle cell proliferation	biological_process	8	0.0108292	ENSRNOG00000002771	Ereg	epiregulin [Source:RGD Symbol;Acc:620299]	3.53527	6.81166	10.5663	1.17724	1.04308	1.27508	5.98307	2.58089	up
GO:0048661	positive regulation of smooth muscle cell proliferation	biological_process	8	0.0108292	ENSRNOG00000004473	Ppargc1a	PPARG coactivator 1 alpha [Source:RGD Symbol;Acc:620925]	0.699099	0.733841	0.380414	1.53806	1.6784	1.50382	0.384163	-1.38021	down
GO:0048661	positive regulation of smooth muscle cell proliferation	biological_process	8	0.0108292	ENSRNOG00000014117	Hmox1	heme oxygenase 1 [Source:RGD Symbol;Acc:2806]	551.077	151.281	396.168	31.9406	70.2869	56.3487	6.92743	2.79232	up
GO:0048661	positive regulation of smooth muscle cell proliferation	biological_process	8	0.0108292	ENSRNOG00000045829	Thbs1	thrombospondin 1 [Source:RGD Symbol;Acc:1588455]	69.4641	106.372	164.303	44.915	55.3273	28.7153	2.6376	1.39923	up
GO:0051216	cartilage development	biological_process	6	0.0108292	ENSRNOG00000006569	Itgb8	integrin subunit beta 8 [Source:RGD Symbol;Acc:1311374]	2.69064	1.81036	3.42008	0.970632	0.984076	0.573387	3.13322	1.64765	up
GO:0051216	cartilage development	biological_process	6	0.0108292	ENSRNOG00000010208	Timp1	TIMP metallopeptidase inhibitor 1 [Source:RGD Symbol;Acc:621675]	191.725	124.836	377.443	58.9436	79.8218	69.1842	3.33737	1.73871	up
GO:0051216	cartilage development	biological_process	6	0.0108292	ENSRNOG00000029980	Zbtb16	zinc finger and BTB domain containing 16 [Source:RGD Symbol;Acc:727921]	2.73773	1.60881	0.909087	49.7177	4.1456	27.6044	0.0645117	-3.95429	down
GO:0051216	cartilage development	biological_process	6	0.0108292	ENSRNOG00000051399	Col10a1	collagen type X alpha 1 chain [Source:RGD Symbol;Acc:2371]	0	0.048914	0.043329	0.098932	0.11115	2.12458	0.0395102	-4.66163	down
GO:0008083	growth factor activity	molecular_function	7	0.0110304	ENSRNOG00000002754	Areg	amphiregulin [Source:RGD Symbol;Acc:2149]	15.0098	32.3225	41.5271	8.39391	7.3053	7.32716	3.85902	1.94824	up
GO:0008083	growth factor activity	molecular_function	7	0.0110304	ENSRNOG00000002771	Ereg	epiregulin [Source:RGD Symbol;Acc:620299]	3.53527	6.81166	10.5663	1.17724	1.04308	1.27508	5.98307	2.58089	up
GO:0008083	growth factor activity	molecular_function	7	0.0110304	ENSRNOG00000007002	Lif	LIF, interleukin 6 family cytokine [Source:RGD Symbol;Acc:620865]	2.79472	2.7336	5.46239	0.880568	1.01865	1.04408	3.73414	1.90078	up
GO:0008083	growth factor activity	molecular_function	7	0.0110304	ENSRNOG00000010208	Timp1	TIMP metallopeptidase inhibitor 1 [Source:RGD Symbol;Acc:621675]	191.725	124.836	377.443	58.9436	79.8218	69.1842	3.33737	1.73871	up
GO:0008083	growth factor activity	molecular_function	7	0.0110304	ENSRNOG00000010278	Il6	interleukin 6 [Source:RGD Symbol;Acc:2901]	3.16485	2.11915	11.0231	0.105601	0.098662	0.045109	65.3927	6.03106	up
GO:0008083	growth factor activity	molecular_function	7	0.0110304	ENSRNOG00000014320	Inhba	inhibin subunit beta A [Source:RGD Symbol;Acc:62074]	1.43305	0.871656	0.743097	0.137745	0.416838	0.219709	3.93625	1.97682	up
GO:0005543	phospholipid binding	molecular_function	5	0.0110517	ENSRNOG00000006911	Sptb	spectrin, beta, erythrocytic [Source:RGD Symbol;Acc:1303243]	0.235205	0.252763	0.222021	0.570131	0.443805	1.02519	0.348183	-1.52208	down
GO:0005543	phospholipid binding	molecular_function	5	0.0110517	ENSRNOG00000008656	Snca	synuclein alpha [Source:RGD Symbol;Acc:3729]	0.033831	0	0.067124	0.192924	0.624332	0.823897	0.0615147	-4.02293	down
GO:0005543	phospholipid binding	molecular_function	5	0.0110517	ENSRNOG00000011800	F3	coagulation factor III, tissue factor [Source:RGD Symbol;Acc:2587]	167.292	169.907	352.923	78.9706	86.6779	136.29	2.28564	1.1926	up
GO:0005543	phospholipid binding	molecular_function	5	0.0110517	ENSRNOG00000016945	Pla2g2a	phospholipase A2 group IIA [Source:RGD Symbol;Acc:620857]	430.776	142.041	305.208	31.8882	19.843	49.1573	8.70292	3.1215	up
GO:0005543	phospholipid binding	molecular_function	5	0.0110517	ENSRNOG00000025691	Pla2g7	phospholipase A2 group VII [Source:RGD Symbol;Acc:1310734]	10.9129	7.49608	7.40635	1.91299	2.90558	5.81907	2.42679	1.27905	up
GO:0010269	response to selenium ion	biological_process	6	0.0110946	ENSRNOG00000013304	Arg1	arginase 1 [Source:RGD Symbol;Acc:2150]	38.2968	26.0177	49.9768	8.35733	12.4054	14.4375	3.24689	1.69906	up
GO:0010269	response to selenium ion	biological_process	6	0.0110946	ENSRNOG00000019048	Sod2	superoxide dismutase 2 [Source:RGD Symbol;Acc:3732]	144.337	78.5731	208.619	40.7461	61.5904	73.5054	2.45407	1.29518	up
GO:2000811	negative regulation of anoikis	biological_process	10	0.0110946	ENSRNOG00000009565	Pdk4	pyruvate dehydrogenase kinase 4 [Source:RGD Symbol;Acc:69061]	2.62301	4.34469	2.6731	12.1191	6.47343	18.0392	0.263182	-1.92587	down
GO:2000811	negative regulation of anoikis	biological_process	10	0.0110946	ENSRNOG00000018839	Ntrk2	neurotrophic receptor tyrosine kinase 2 [Source:RGD Symbol;Acc:3213]	2.74908	5.01041	5.1754	1.89725	0.712652	1.98932	2.81241	1.49181	up
GO:0042417	dopamine metabolic process	biological_process	9	0.0110946	ENSRNOG00000008656	Snca	synuclein alpha [Source:RGD Symbol;Acc:3729]	0.033831	0	0.067124	0.192924	0.624332	0.823897	0.0615147	-4.02293	down
GO:0042417	dopamine metabolic process	biological_process	9	0.0110946	ENSRNOG00000032261	Cyp2d4	cytochrome P450, family 2, subfamily d, polypeptide 4 [Source:RGD Symbol;Acc:620640]	3.90219	4.53709	2.88962	9.25606	7.48095	6.29301	0.491919	-1.02351	down
GO:0044327	dendritic spine head	cellular_component	4	0.0110946	ENSRNOG00000020263	Atp1a3	ATPase Na+/K+ transporting subunit alpha 3 [Source:RGD Symbol;Acc:2169]	1.61757	1.90245	1.13016	0.671541	0.692308	0.956255	2.0043	1.0031	up
GO:0044327	dendritic spine head	cellular_component	4	0.0110946	ENSRNOG00000028404	Ppp1r1b	protein phosphatase 1, regulatory (inhibitor) subunit 1B [Source:RGD Symbol;Acc:621859]	7.76903	6.02664	5.6708	22.4231	7.67647	15.2862	0.428911	-1.22125	down
GO:0055008	cardiac muscle tissue morphogenesis	biological_process	7	0.0110946	ENSRNOG00000016181	Tbx20	T-box 20 [Source:RGD Symbol;Acc:1309396]	0	0	0	0	0	0.778032	0.000385588	-11.3407	down
GO:0055008	cardiac muscle tissue morphogenesis	biological_process	7	0.0110946	ENSRNOG00000018598	Ankrd1	ankyrin repeat domain 1 [Source:RGD Symbol;Acc:61989]	107.023	107.496	209.618	52.1948	92.124	57.3024	2.10363	1.07288	up
GO:0030007	cellular potassium ion homeostasis	biological_process	11	0.0110946	ENSRNOG00000007290	Atp1a2	ATPase Na+/K+ transporting subunit alpha 2 [Source:RGD Symbol;Acc:2168]	1.11361	2.2107	0.439613	6.02731	3.2216	13.5037	0.165429	-2.59572	down
GO:0030007	cellular potassium ion homeostasis	biological_process	11	0.0110946	ENSRNOG00000020263	Atp1a3	ATPase Na+/K+ transporting subunit alpha 3 [Source:RGD Symbol;Acc:2169]	1.61757	1.90245	1.13016	0.671541	0.692308	0.956255	2.0043	1.0031	up
GO:0006940	regulation of smooth muscle contraction	biological_process	9	0.0110946	ENSRNOG00000007290	Atp1a2	ATPase Na+/K+ transporting subunit alpha 2 [Source:RGD Symbol;Acc:2168]	1.11361	2.2107	0.439613	6.02731	3.2216	13.5037	0.165429	-2.59572	down
GO:0006940	regulation of smooth muscle contraction	biological_process	9	0.0110946	ENSRNOG00000013887	Adra2b	adrenoceptor alpha 2B [Source:RGD Symbol;Acc:2057]	0.323727	0.349478	0.234101	1.5404	0.988549	0.490279	0.300509	-1.73452	down
GO:0005901	caveola	cellular_component	8	0.0114842	ENSRNOG00000002723	Sele	selectin E [Source:RGD Symbol;Acc:3654]	2.98187	1.19921	3.6168	0.148222	0.414433	0.461137	7.61667	2.92916	up
GO:0005901	caveola	cellular_component	8	0.0114842	ENSRNOG00000007290	Atp1a2	ATPase Na+/K+ transporting subunit alpha 2 [Source:RGD Symbol;Acc:2168]	1.11361	2.2107	0.439613	6.02731	3.2216	13.5037	0.165429	-2.59572	down
GO:0005901	caveola	cellular_component	8	0.0114842	ENSRNOG00000014117	Hmox1	heme oxygenase 1 [Source:RGD Symbol;Acc:2806]	551.077	151.281	396.168	31.9406	70.2869	56.3487	6.92743	2.79232	up
GO:0005901	caveola	cellular_component	8	0.0114842	ENSRNOG00000014481	Adtrp	androgen-dependent TFPI-regulating protein [Source:RGD Symbol;Acc:1305679]	4.99979	4.28189	7.60994	2.40931	3.24639	2.70577	2.02017	1.01448	up
GO:0006814	sodium ion transport	biological_process	9	0.0115561	ENSRNOG00000002057	Slc10a6	solute carrier family 10 member 6 [Source:RGD Symbol;Acc:727800]	3.96106	4.88697	5.25415	12.9457	9.46746	7.50803	0.471311	-1.08525	down
GO:0006814	sodium ion transport	biological_process	9	0.0115561	ENSRNOG00000006639	Scn9a	sodium voltage-gated channel alpha subunit 9 [Source:RGD Symbol;Acc:69368]	0	0	0	0.00415055	0.00708024	0.083853	0.00315511	-8.30809	down
GO:0006814	sodium ion transport	biological_process	9	0.0115561	ENSRNOG00000007290	Atp1a2	ATPase Na+/K+ transporting subunit alpha 2 [Source:RGD Symbol;Acc:2168]	1.11361	2.2107	0.439613	6.02731	3.2216	13.5037	0.165429	-2.59572	down
GO:0006814	sodium ion transport	biological_process	9	0.0115561	ENSRNOG00000019985	Asic4	acid sensing ion channel subunit family member 4 [Source:RGD Symbol;Acc:621068]	0.519072	0.259738	0.306778	0.063806	0.056224	0.087246	5.2374	2.38885	up
GO:0006814	sodium ion transport	biological_process	9	0.0115561	ENSRNOG00000020263	Atp1a3	ATPase Na+/K+ transporting subunit alpha 3 [Source:RGD Symbol;Acc:2169]	1.61757	1.90245	1.13016	0.671541	0.692308	0.956255	2.0043	1.0031	up
GO:0014070	response to organic cyclic compound	biological_process	6	0.0118615	ENSRNOG00000002331	Aldh3a1	aldehyde dehydrogenase 3 family, member A1 [Source:RGD Symbol;Acc:2088]	0.906245	1.33741	0.734843	1.81694	2.09876	14.0727	0.165579	-2.59441	down
GO:0014070	response to organic cyclic compound	biological_process	6	0.0118615	ENSRNOG00000002754	Areg	amphiregulin [Source:RGD Symbol;Acc:2149]	15.0098	32.3225	41.5271	8.39391	7.3053	7.32716	3.85902	1.94824	up
GO:0014070	response to organic cyclic compound	biological_process	6	0.0118615	ENSRNOG00000004473	Ppargc1a	PPARG coactivator 1 alpha [Source:RGD Symbol;Acc:620925]	0.699099	0.733841	0.380414	1.53806	1.6784	1.50382	0.384163	-1.38021	down
GO:0014070	response to organic cyclic compound	biological_process	6	0.0118615	ENSRNOG00000004537	Rxrg	retinoid X receptor gamma [Source:RGD Symbol;Acc:620046]	0.784535	1.26834	0.531943	2.96272	1.86653	2.04611	0.375954	-1.41137	down
GO:0014070	response to organic cyclic compound	biological_process	6	0.0118615	ENSRNOG00000010210	Slc7a11	solute carrier family 7 member 11 [Source:RGD Symbol;Acc:1309275]	0.785658	0.686638	0.778759	0.116861	0.130128	0.355379	3.73701	1.90188	up
GO:0014070	response to organic cyclic compound	biological_process	6	0.0118615	ENSRNOG00000010278	Il6	interleukin 6 [Source:RGD Symbol;Acc:2901]	3.16485	2.11915	11.0231	0.105601	0.098662	0.045109	65.3927	6.03106	up
GO:0014070	response to organic cyclic compound	biological_process	6	0.0118615	ENSRNOG00000019500	Cyp1a1	cytochrome P450, family 1, subfamily a, polypeptide 1 [Source:RGD Symbol;Acc:2458]	3.79747	8.76837	3.6107	28.2685	25.6761	8.90865	0.25737	-1.95808	down
GO:0009986	cell surface	cellular_component	4	0.011983	ENSRNOG00000002302	Corin	corin, serine peptidase [Source:RGD Symbol;Acc:727887]	0.106521	0.316943	0.05572	0.485884	0.896918	1.82259	0.149493	-2.74185	down
GO:0009986	cell surface	cellular_component	4	0.011983	ENSRNOG00000002754	Areg	amphiregulin [Source:RGD Symbol;Acc:2149]	15.0098	32.3225	41.5271	8.39391	7.3053	7.32716	3.85902	1.94824	up
GO:0009986	cell surface	cellular_component	4	0.011983	ENSRNOG00000003546	Tnfrsf12a	TNF receptor superfamily member 12A [Source:RGD Symbol;Acc:631329]	41.3385	35.8452	71.9517	13.9554	16.6142	17.2047	3.12167	1.64232	up
GO:0009986	cell surface	cellular_component	4	0.011983	ENSRNOG00000006569	Itgb8	integrin subunit beta 8 [Source:RGD Symbol;Acc:1311374]	2.69064	1.81036	3.42008	0.970632	0.984076	0.573387	3.13322	1.64765	up
GO:0009986	cell surface	cellular_component	4	0.011983	ENSRNOG00000010210	Slc7a11	solute carrier family 7 member 11 [Source:RGD Symbol;Acc:1309275]	0.785658	0.686638	0.778759	0.116861	0.130128	0.355379	3.73701	1.90188	up
GO:0009986	cell surface	cellular_component	4	0.011983	ENSRNOG00000011800	F3	coagulation factor III, tissue factor [Source:RGD Symbol;Acc:2587]	167.292	169.907	352.923	78.9706	86.6779	136.29	2.28564	1.1926	up
GO:0009986	cell surface	cellular_component	4	0.011983	ENSRNOG00000013123	Scube2	signal peptide, CUB domain and EGF like domain containing 2 [Source:RGD Symbol;Acc:1563998]	0.455884	0.895264	0.540782	2.64025	1.38693	1.64651	0.333456	-1.58443	down
GO:0009986	cell surface	cellular_component	4	0.011983	ENSRNOG00000013887	Adra2b	adrenoceptor alpha 2B [Source:RGD Symbol;Acc:2057]	0.323727	0.349478	0.234101	1.5404	0.988549	0.490279	0.300509	-1.73452	down
GO:0009986	cell surface	cellular_component	4	0.011983	ENSRNOG00000014481	Adtrp	androgen-dependent TFPI-regulating protein [Source:RGD Symbol;Acc:1305679]	4.99979	4.28189	7.60994	2.40931	3.24639	2.70577	2.02017	1.01448	up
GO:0009986	cell surface	cellular_component	4	0.011983	ENSRNOG00000018839	Ntrk2	neurotrophic receptor tyrosine kinase 2 [Source:RGD Symbol;Acc:3213]	2.74908	5.01041	5.1754	1.89725	0.712652	1.98932	2.81241	1.49181	up
GO:0009986	cell surface	cellular_component	4	0.011983	ENSRNOG00000019622	Ackr3	atypical chemokine receptor 3 [Source:RGD Symbol;Acc:620601]	76.304	96.1834	133.552	44.5313	43.6139	45.7138	2.28628	1.193	up
GO:0009986	cell surface	cellular_component	4	0.011983	ENSRNOG00000025074	Fgg	fibrinogen gamma chain [Source:RGD Symbol;Acc:2613]	127.794	78.6948	180.988	61.9913	70.073	37.5544	2.2844	1.19181	up
GO:0009986	cell surface	cellular_component	4	0.011983	ENSRNOG00000045829	Thbs1	thrombospondin 1 [Source:RGD Symbol;Acc:1588455]	69.4641	106.372	164.303	44.915	55.3273	28.7153	2.6376	1.39923	up
GO:0009986	cell surface	cellular_component	4	0.011983	ENSRNOG00000057189	LOC103690326	dendritic cell-specific transmembrane protein [Source:RGD Symbol;Acc:9418155]	3.24249	1.95639	2.80602	0.771978	1.43757	0.677644	2.77256	1.47122	up
GO:0042594	response to starvation	biological_process	5	0.012773	ENSRNOG00000000165	Pfkfb1	6-phosphofructo-2-kinase/fructose-2,6-biphosphatase 1 [Source:RGD Symbol;Acc:3307]	1.11783	0.881053	0.727267	4.38349	2.08208	3.12985	0.284109	-1.81548	down
GO:0042594	response to starvation	biological_process	5	0.012773	ENSRNOG00000004473	Ppargc1a	PPARG coactivator 1 alpha [Source:RGD Symbol;Acc:620925]	0.699099	0.733841	0.380414	1.53806	1.6784	1.50382	0.384163	-1.38021	down
GO:0042594	response to starvation	biological_process	5	0.012773	ENSRNOG00000009565	Pdk4	pyruvate dehydrogenase kinase 4 [Source:RGD Symbol;Acc:69061]	2.62301	4.34469	2.6731	12.1191	6.47343	18.0392	0.263182	-1.92587	down
GO:0046677	response to antibiotic	biological_process	5	0.012773	ENSRNOG00000007159	Ccl2	C-C motif chemokine ligand 2 [Source:RGD Symbol;Acc:3645]	37.7066	18.9936	41.8423	1.13671	3.71253	3.7896	11.4069	3.51183	up
GO:0046677	response to antibiotic	biological_process	5	0.012773	ENSRNOG00000010278	Il6	interleukin 6 [Source:RGD Symbol;Acc:2901]	3.16485	2.11915	11.0231	0.105601	0.098662	0.045109	65.3927	6.03106	up
GO:0046677	response to antibiotic	biological_process	5	0.012773	ENSRNOG00000019500	Cyp1a1	cytochrome P450, family 1, subfamily a, polypeptide 1 [Source:RGD Symbol;Acc:2458]	3.79747	8.76837	3.6107	28.2685	25.6761	8.90865	0.25737	-1.95808	down
GO:0001725	stress fiber	cellular_component	7	0.0128692	ENSRNOG00000016983	Myh7	myosin heavy chain 7 [Source:RGD Symbol;Acc:62030]	0	0.002143	0	0.00806	0.008274	5.03787	0.000424004	-11.2036	down
GO:0001725	stress fiber	cellular_component	7	0.0128692	ENSRNOG00000017786	Acta1	actin, alpha 1, skeletal muscle [Source:RGD Symbol;Acc:2025]	9.08505	7.68911	17.567	2.06127	3.95623	4.72239	3.19753	1.67696	up
GO:0001725	stress fiber	cellular_component	7	0.0128692	ENSRNOG00000033261	Fam107a	family with sequence similarity 107, member A [Source:RGD Symbol;Acc:1306327]	1.69277	1.16438	0.665421	3.69912	2.16074	4.27099	0.347707	-1.52406	down
GO:0001725	stress fiber	cellular_component	7	0.0128692	ENSRNOG00000034258	Xirp2	xin actin-binding repeat containing 2 [Source:RGD Symbol;Acc:1302980]	0	0	0	0	0	0.448301	0.000669193	-10.5453	down
GO:0060707	trophoblast giant cell differentiation	biological_process	6	0.013184	ENSRNOG00000002946	Socs3	suppressor of cytokine signaling 3 [Source:RGD Symbol;Acc:621087]	50.4008	65.1614	87.6908	40.5991	23.2455	16.4051	2.53276	1.34071	up
GO:0060707	trophoblast giant cell differentiation	biological_process	6	0.013184	ENSRNOG00000007002	Lif	LIF, interleukin 6 family cytokine [Source:RGD Symbol;Acc:620865]	2.79472	2.7336	5.46239	0.880568	1.01865	1.04408	3.73414	1.90078	up
GO:0005344	oxygen carrier activity	molecular_function	4	0.013184	ENSRNOG00000045989	Hba-a3	hemoglobin alpha, adult chain 3 [Source:RGD Symbol;Acc:1359209]	29.1036	33.0564	24.4265	54.478	69.3314	104.209	0.379734	-1.39694	down
GO:0005344	oxygen carrier activity	molecular_function	4	0.013184	ENSRNOG00000047321	Hba-a2	hemoglobin alpha, adult chain 2 [Source:RGD Symbol;Acc:1359364]	622.608	817.629	600.355	1003.7	1375.98	1844.64	0.483058	-1.04973	down
GO:0042448	progesterone metabolic process	biological_process	8	0.013184	ENSRNOG00000038319	Akr1c19	aldo-keto reductase family 1, member C19 [Source:RGD Symbol;Acc:1562954]	4.58014	5.43589	2.94887	7.99767	9.39868	9.74826	0.477623	-1.06605	down
GO:0042448	progesterone metabolic process	biological_process	8	0.013184	ENSRNOG00000058568	Dhrs9	dehydrogenase/reductase 9 [Source:RGD Symbol;Acc:620655]	9.49096	6.67188	18.1665	1.17878	2.82958	3.45117	4.60207	2.20228	up
GO:0046426	negative regulation of receptor signaling pathway via JAK-STAT	biological_process	10	0.013184	ENSRNOG00000002946	Socs3	suppressor of cytokine signaling 3 [Source:RGD Symbol;Acc:621087]	50.4008	65.1614	87.6908	40.5991	23.2455	16.4051	2.53276	1.34071	up
GO:0046426	negative regulation of receptor signaling pathway via JAK-STAT	biological_process	10	0.013184	ENSRNOG00000043416	Bcl3	BCL3, transcription coactivator [Source:RGD Symbol;Acc:1589465]	16.3829	10.3304	23.1764	5.68874	5.93954	6.44326	2.76067	1.46502	up
GO:0048489	synaptic vesicle transport	biological_process	6	0.013184	ENSRNOG00000008656	Snca	synuclein alpha [Source:RGD Symbol;Acc:3729]	0.033831	0	0.067124	0.192924	0.624332	0.823897	0.0615147	-4.02293	down
GO:0048489	synaptic vesicle transport	biological_process	6	0.013184	ENSRNOG00000019433	Rab3a	RAB3A, member RAS oncogene family [Source:RGD Symbol;Acc:3528]	5.25359	6.66674	3.95532	13.6283	11.8968	8.19245	0.470843	-1.08668	down
GO:0060413	atrial septum morphogenesis	biological_process	6	0.013184	ENSRNOG00000014350	Ccn1	cellular communication network factor 1 [Source:RGD Symbol;Acc:620763]	80.4142	168.259	87.5866	30.0122	51.2155	26.7196	3.11503	1.63925	up
GO:0060413	atrial septum morphogenesis	biological_process	6	0.013184	ENSRNOG00000016181	Tbx20	T-box 20 [Source:RGD Symbol;Acc:1309396]	0	0	0	0	0	0.778032	0.000385588	-11.3407	down
GO:0015671	oxygen transport	biological_process	7	0.013184	ENSRNOG00000045989	Hba-a3	hemoglobin alpha, adult chain 3 [Source:RGD Symbol;Acc:1359209]	29.1036	33.0564	24.4265	54.478	69.3314	104.209	0.379734	-1.39694	down
GO:0015671	oxygen transport	biological_process	7	0.013184	ENSRNOG00000047321	Hba-a2	hemoglobin alpha, adult chain 2 [Source:RGD Symbol;Acc:1359364]	622.608	817.629	600.355	1003.7	1375.98	1844.64	0.483058	-1.04973	down
GO:0019373	epoxygenase P450 pathway	biological_process	12	0.013184	ENSRNOG00000012458	Cyp2e1	cytochrome P450, family 2, subfamily e, polypeptide 1 [Source:RGD Symbol;Acc:2475]	1.59029	2.0422	0.503894	5.70974	4.74285	4.83838	0.270512	-1.88624	down
GO:0019373	epoxygenase P450 pathway	biological_process	12	0.013184	ENSRNOG00000028891	Cyp2t1	cytochrome P450, family 2, subfamily t, polypeptide 1 [Source:RGD Symbol;Acc:620086]	2.88466	3.24066	2.34437	4.17459	4.32691	8.6706	0.493224	-1.01969	down
GO:0043229	intracellular organelle	cellular_component	4	0.013184	ENSRNOG00000018606	Olr59	olfactory receptor 59 [Source:RGD Symbol;Acc:628858]	1.22605	1.00656	1.51125	0.528759	0.534917	0.739663	2.07607	1.05386	up
GO:0043229	intracellular organelle	cellular_component	4	0.013184	ENSRNOG00000019433	Rab3a	RAB3A, member RAS oncogene family [Source:RGD Symbol;Acc:3528]	5.25359	6.66674	3.95532	13.6283	11.8968	8.19245	0.470843	-1.08668	down
GO:0030194	positive regulation of blood coagulation	biological_process	8	0.013184	ENSRNOG00000001414	Serpine1	serpin family E member 1 [Source:RGD Symbol;Acc:3249]	55.409	67.7847	164.683	17.9559	19.5535	21.1919	4.90409	2.29399	up
GO:0030194	positive regulation of blood coagulation	biological_process	8	0.013184	ENSRNOG00000045829	Thbs1	thrombospondin 1 [Source:RGD Symbol;Acc:1588455]	69.4641	106.372	164.303	44.915	55.3273	28.7153	2.6376	1.39923	up
GO:0032026	response to magnesium ion	biological_process	7	0.013184	ENSRNOG00000008656	Snca	synuclein alpha [Source:RGD Symbol;Acc:3729]	0.033831	0	0.067124	0.192924	0.624332	0.823897	0.0615147	-4.02293	down
GO:0032026	response to magnesium ion	biological_process	7	0.013184	ENSRNOG00000045829	Thbs1	thrombospondin 1 [Source:RGD Symbol;Acc:1588455]	69.4641	106.372	164.303	44.915	55.3273	28.7153	2.6376	1.39923	up
GO:0042573	retinoic acid metabolic process	biological_process	11	0.013184	ENSRNOG00000012436	Adh6	alcohol dehydrogenase 1 (class I) [Source:RGD Symbol;Acc:2044]	3.44215	4.16162	1.57908	6.77746	7.28181	9.62364	0.387742	-1.36683	down
GO:0042573	retinoic acid metabolic process	biological_process	11	0.013184	ENSRNOG00000058568	Dhrs9	dehydrogenase/reductase 9 [Source:RGD Symbol;Acc:620655]	9.49096	6.67188	18.1665	1.17878	2.82958	3.45117	4.60207	2.20228	up
GO:0030212	hyaluronan metabolic process	biological_process	8	0.013184	ENSRNOG00000004854	Has2	hyaluronan synthase 2 [Source:RGD Symbol;Acc:2781]	0.632455	0.404069	0.485014	0.116629	0.11933	0.20685	3.4361	1.78077	up
GO:0030212	hyaluronan metabolic process	biological_process	8	0.013184	ENSRNOG00000049614	AABR07028488		0.35126	0.524043	0.288915	0.939791	0.51385	7.48834	0.130197	-2.94123	down
GO:0071498	cellular response to fluid shear stress	biological_process	6	0.013184	ENSRNOG00000004854	Has2	hyaluronan synthase 2 [Source:RGD Symbol;Acc:2781]	0.632455	0.404069	0.485014	0.116629	0.11933	0.20685	3.4361	1.78077	up
GO:0071498	cellular response to fluid shear stress	biological_process	6	0.013184	ENSRNOG00000010513	Tfpi2	tissue factor pathway inhibitor 2 [Source:RGD Symbol;Acc:628629]	2.00105	1.77887	4.74033	0.303871	0.748737	1.02747	4.09613	2.03426	up
GO:0051016	barbed-end actin filament capping	biological_process	11	0.013184	ENSRNOG00000015903	Add2	adducin 2 [Source:RGD Symbol;Acc:2042]	0.471254	0.687281	0.447776	1.00894	1.70809	1.63371	0.369205	-1.43751	down
GO:0051016	barbed-end actin filament capping	biological_process	11	0.013184	ENSRNOG00000018991	Gsn	gelsolin [Source:RGD Symbol;Acc:1303089]	421.812	450.543	281.254	941.528	460.793	1133.21	0.454977	-1.13614	down
GO:0015106	bicarbonate transmembrane transporter activity	molecular_function	8	0.013184	ENSRNOG00000020951	Slc4a1	solute carrier family 4 member 1 (Diego blood group) [Source:RGD Symbol;Acc:3710]	0.638523	0.746664	0.545707	1.90142	2.54942	4.14042	0.224751	-2.1536	down
GO:0015106	bicarbonate transmembrane transporter activity	molecular_function	8	0.013184	ENSRNOG00000058692	Slc26a4	solute carrier family 26 member 4 [Source:RGD Symbol;Acc:3293]	32.2035	26.0783	43.1394	4.03381	8.98354	10.6969	4.27681	2.09653	up
GO:0048143	astrocyte activation	biological_process	6	0.013184	ENSRNOG00000004649	Il1b	interleukin 1 beta [Source:RGD Symbol;Acc:2891]	17.0922	15.7097	15.266	6.22867	5.3594	4.98742	2.89994	1.53602	up
GO:0048143	astrocyte activation	biological_process	6	0.013184	ENSRNOG00000043098	Mt2A	metallothionein 2A [Source:RGD Symbol;Acc:1592345]	46.8268	38.1857	98.9606	22.5488	25.925	34.0743	2.22868	1.15619	up
GO:0071560	cellular response to transforming growth factor beta stimulus	biological_process	8	0.0135999	ENSRNOG00000001926	Cldn1	claudin 1 [Source:RGD Symbol;Acc:68422]	0.854451	0.532531	0.439747	1.41622	1.43284	1.98282	0.378057	-1.40332	down
GO:0071560	cellular response to transforming growth factor beta stimulus	biological_process	8	0.0135999	ENSRNOG00000004473	Ppargc1a	PPARG coactivator 1 alpha [Source:RGD Symbol;Acc:620925]	0.699099	0.733841	0.380414	1.53806	1.6784	1.50382	0.384163	-1.38021	down
GO:0071560	cellular response to transforming growth factor beta stimulus	biological_process	8	0.0135999	ENSRNOG00000013304	Arg1	arginase 1 [Source:RGD Symbol;Acc:2150]	38.2968	26.0177	49.9768	8.35733	12.4054	14.4375	3.24689	1.69906	up
GO:0071560	cellular response to transforming growth factor beta stimulus	biological_process	8	0.0135999	ENSRNOG00000018598	Ankrd1	ankyrin repeat domain 1 [Source:RGD Symbol;Acc:61989]	107.023	107.496	209.618	52.1948	92.124	57.3024	2.10363	1.07288	up
GO:0000976	transcription regulatory region sequence-specific DNA binding	molecular_function	8	0.0135999	ENSRNOG00000003745	Atf3	activating transcription factor 3 [Source:RGD Symbol;Acc:2165]	10.4013	37.4337	46.2986	3.78197	4.08518	7.17428	6.25829	2.64577	up
GO:0000976	transcription regulatory region sequence-specific DNA binding	molecular_function	8	0.0135999	ENSRNOG00000014448	Arntl	aryl hydrocarbon receptor nuclear translocator-like [Source:RGD Symbol;Acc:62003]	7.69285	5.52374	7.07682	4.26659	2.17754	3.16265	2.1124	1.07889	up
GO:0000976	transcription regulatory region sequence-specific DNA binding	molecular_function	8	0.0135999	ENSRNOG00000019422	Egr1	early growth response 1 [Source:RGD Symbol;Acc:2544]	28.8778	81.6766	49.115	5.6807	12.1778	9.44428	5.8481	2.54797	up
GO:0000976	transcription regulatory region sequence-specific DNA binding	molecular_function	8	0.0135999	ENSRNOG00000020254	Per2	period circadian regulator 2 [Source:RGD Symbol;Acc:61945]	5.08553	8.59563	7.97541	10.986	14.3571	23.4713	0.443651	-1.1725	down
GO:0048286	lung alveolus development	biological_process	5	0.0138579	ENSRNOG00000007002	Lif	LIF, interleukin 6 family cytokine [Source:RGD Symbol;Acc:620865]	2.79472	2.7336	5.46239	0.880568	1.01865	1.04408	3.73414	1.90078	up
GO:0048286	lung alveolus development	biological_process	5	0.0138579	ENSRNOG00000010210	Slc7a11	solute carrier family 7 member 11 [Source:RGD Symbol;Acc:1309275]	0.785658	0.686638	0.778759	0.116861	0.130128	0.355379	3.73701	1.90188	up
GO:0048286	lung alveolus development	biological_process	5	0.0138579	ENSRNOG00000057092	Slfn4	schlafen 4 [Source:RGD Symbol;Acc:620455]	30.0271	25.2958	37.3435	21.7386	11.4292	13.1179	2.00205	1.00148	up
GO:0050660	flavin adenine dinucleotide binding	molecular_function	6	0.0143565	ENSRNOG00000003510	Fmo2	flavin containing dimethylaniline monoxygenase 2 [Source:RGD Symbol;Acc:628600]	36.2628	40.8993	13.9322	160.378	105.178	155.493	0.216351	-2.20855	down
GO:0050660	flavin adenine dinucleotide binding	molecular_function	6	0.0143565	ENSRNOG00000003620	Fmo3	flavin containing dimethylaniline monoxygenase 3 [Source:RGD Symbol;Acc:619761]	5.58543	7.00354	2.57024	22.1896	18.4762	39.5247	0.18904	-2.40324	down
GO:0050660	flavin adenine dinucleotide binding	molecular_function	6	0.0143565	ENSRNOG00000049851	Fmo6	flavin containing monooxygenase 6 [Source:RGD Symbol;Acc:1559491]	0.023136	0.014864	0.04261	0.734681	0.198205	13.4635	0.00559931	-7.48054	down
GO:0050660	flavin adenine dinucleotide binding	molecular_function	6	0.0143565	ENSRNOG00000062125	Aox3	aldehyde oxidase 3 [Source:RGD Symbol;Acc:1359328]	0.87407	1.02473	0.56828	1.87058	1.06784	3.69308	0.372024	-1.42653	down
GO:0008285	negative regulation of cell population proliferation	biological_process	7	0.0143637	ENSRNOG00000002771	Ereg	epiregulin [Source:RGD Symbol;Acc:620299]	3.53527	6.81166	10.5663	1.17724	1.04308	1.27508	5.98307	2.58089	up
GO:0008285	negative regulation of cell population proliferation	biological_process	7	0.0143637	ENSRNOG00000004470	Il24	interleukin 24 [Source:RGD Symbol;Acc:621484]	4.71744	2.76935	8.35128	0.401454	0.398275	1.3272	7.44644	2.89655	up
GO:0008285	negative regulation of cell population proliferation	biological_process	7	0.0143637	ENSRNOG00000004649	Il1b	interleukin 1 beta [Source:RGD Symbol;Acc:2891]	17.0922	15.7097	15.266	6.22867	5.3594	4.98742	2.89994	1.53602	up
GO:0008285	negative regulation of cell population proliferation	biological_process	7	0.0143637	ENSRNOG00000005944	Slurp1	secreted Ly6/Plaur domain containing 1 [Source:RGD Symbol;Acc:1308768]	5.49258	1.6078	5.19726	0.125839	0.800363	0.417785	9.15011	3.19379	up
GO:0008285	negative regulation of cell population proliferation	biological_process	7	0.0143637	ENSRNOG00000007002	Lif	LIF, interleukin 6 family cytokine [Source:RGD Symbol;Acc:620865]	2.79472	2.7336	5.46239	0.880568	1.01865	1.04408	3.73414	1.90078	up
GO:0008285	negative regulation of cell population proliferation	biological_process	7	0.0143637	ENSRNOG00000010278	Il6	interleukin 6 [Source:RGD Symbol;Acc:2901]	3.16485	2.11915	11.0231	0.105601	0.098662	0.045109	65.3927	6.03106	up
GO:0008285	negative regulation of cell population proliferation	biological_process	7	0.0143637	ENSRNOG00000013074	Wt1	WT1 transcription factor [Source:RGD Symbol;Acc:3974]	6.51322	3.77358	7.11635	1.80892	3.61924	2.35499	2.236	1.16092	up
GO:0008285	negative regulation of cell population proliferation	biological_process	7	0.0143637	ENSRNOG00000014117	Hmox1	heme oxygenase 1 [Source:RGD Symbol;Acc:2806]	551.077	151.281	396.168	31.9406	70.2869	56.3487	6.92743	2.79232	up
GO:0008285	negative regulation of cell population proliferation	biological_process	7	0.0143637	ENSRNOG00000014320	Inhba	inhibin subunit beta A [Source:RGD Symbol;Acc:62074]	1.43305	0.871656	0.743097	0.137745	0.416838	0.219709	3.93625	1.97682	up
GO:0008285	negative regulation of cell population proliferation	biological_process	7	0.0143637	ENSRNOG00000029980	Zbtb16	zinc finger and BTB domain containing 16 [Source:RGD Symbol;Acc:727921]	2.73773	1.60881	0.909087	49.7177	4.1456	27.6044	0.0645117	-3.95429	down
GO:1903903	regulation of establishment of T cell polarity	biological_process	9	0.0148734	ENSRNOG00000018991	Gsn	gelsolin [Source:RGD Symbol;Acc:1303089]	421.812	450.543	281.254	941.528	460.793	1133.21	0.454977	-1.13614	down
GO:2000211	regulation of glutamate metabolic process	biological_process	10	0.0148734	ENSRNOG00000010210	Slc7a11	solute carrier family 7 member 11 [Source:RGD Symbol;Acc:1309275]	0.785658	0.686638	0.778759	0.116861	0.130128	0.355379	3.73701	1.90188	up
GO:0030748	amine N-methyltransferase activity	molecular_function	8	0.0148734	ENSRNOG00000011250	Inmt	indolethylamine N-methyltransferase [Source:RGD Symbol;Acc:1597087]	3.66093	5.49999	4.98651	16.9182	9.65093	12.8462	0.358932	-1.47822	down
GO:0051946	regulation of glutamate uptake involved in transmission of nerve impulse	biological_process	12	0.0148734	ENSRNOG00000020254	Per2	period circadian regulator 2 [Source:RGD Symbol;Acc:61945]	5.08553	8.59563	7.97541	10.986	14.3571	23.4713	0.443651	-1.1725	down
GO:0071873	response to norepinephrine	biological_process	8	0.0148734	ENSRNOG00000004473	Ppargc1a	PPARG coactivator 1 alpha [Source:RGD Symbol;Acc:620925]	0.699099	0.733841	0.380414	1.53806	1.6784	1.50382	0.384163	-1.38021	down
GO:0072227	metanephric macula densa development	biological_process	10	0.0148734	ENSRNOG00000038909	Pou3f3	POU class 3 homeobox 3 [Source:RGD Symbol;Acc:619768]	0	1.4154	0	0	0	0	4718.01	12.204	up
GO:0035684	helper T cell extravasation	biological_process	7	0.0148734	ENSRNOG00000007159	Ccl2	C-C motif chemokine ligand 2 [Source:RGD Symbol;Acc:3645]	37.7066	18.9936	41.8423	1.13671	3.71253	3.7896	11.4069	3.51183	up
GO:0019341	dibenzo-p-dioxin catabolic process	biological_process	7	0.0148734	ENSRNOG00000019500	Cyp1a1	cytochrome P450, family 1, subfamily a, polypeptide 1 [Source:RGD Symbol;Acc:2458]	3.79747	8.76837	3.6107	28.2685	25.6761	8.90865	0.25737	-1.95808	down
GO:1903815	negative regulation of collecting lymphatic vessel constriction	biological_process	7	0.0148734	ENSRNOG00000008176	Nppa	natriuretic peptide A [Source:RGD Symbol;Acc:3193]	0	0	0	0	0	4.77912	6.27731e-05	-13.9595	down
GO:1903284	positive regulation of glutathione peroxidase activity	biological_process	8	0.0148734	ENSRNOG00000008656	Snca	synuclein alpha [Source:RGD Symbol;Acc:3729]	0.033831	0	0.067124	0.192924	0.624332	0.823897	0.0615147	-4.02293	down
GO:0050812	regulation of acyl-CoA biosynthetic process	biological_process	9	0.0148734	ENSRNOG00000008656	Snca	synuclein alpha [Source:RGD Symbol;Acc:3729]	0.033831	0	0.067124	0.192924	0.624332	0.823897	0.0615147	-4.02293	down
GO:0031294	lymphocyte costimulation	biological_process	4	0.0148734	ENSRNOG00000010278	Il6	interleukin 6 [Source:RGD Symbol;Acc:2901]	3.16485	2.11915	11.0231	0.105601	0.098662	0.045109	65.3927	6.03106	up
GO:0034146	toll-like receptor 5 signaling pathway	biological_process	9	0.0148734	ENSRNOG00000022067	Tlr5	toll-like receptor 5 [Source:RGD Symbol;Acc:631351]	1.22779	1.25646	1.08737	3.79088	2.48157	3.94515	0.349555	-1.51641	down
GO:0042559	pteridine-containing compound biosynthetic process	biological_process	7	0.0148734	ENSRNOG00000011039	Gch1	GTP cyclohydrolase 1 [Source:RGD Symbol;Acc:61992]	24.2456	21.4661	37.719	10.8419	15.8192	13.7037	2.06692	1.04748	up
GO:0060598	dichotomous subdivision of terminal units involved in mammary gland duct morphogenesis	biological_process	8	0.0148734	ENSRNOG00000002754	Areg	amphiregulin [Source:RGD Symbol;Acc:2149]	15.0098	32.3225	41.5271	8.39391	7.3053	7.32716	3.85902	1.94824	up
GO:0019448	L-cysteine catabolic process	biological_process	12	0.0148734	ENSRNOG00000000158	Cdo1	cysteine dioxygenase type 1 [Source:RGD Symbol;Acc:69262]	13.6117	16.2309	8.62663	48.0212	33.1986	69.6373	0.255005	-1.9714	down
GO:1901863	positive regulation of muscle tissue development	biological_process	7	0.0148734	ENSRNOG00000004473	Ppargc1a	PPARG coactivator 1 alpha [Source:RGD Symbol;Acc:620925]	0.699099	0.733841	0.380414	1.53806	1.6784	1.50382	0.384163	-1.38021	down
GO:0021666	rhombomere 5 formation	biological_process	6	0.0148734	ENSRNOG00000000640	Egr2	early growth response 2 [Source:RGD Symbol;Acc:621608]	3.15739	6.1992	6.47142	1.3654	1.96587	0.959568	3.68879	1.88315	up
GO:0098759	cellular response to interleukin-8	biological_process	8	0.0148734	ENSRNOG00000019422	Egr1	early growth response 1 [Source:RGD Symbol;Acc:2544]	28.8778	81.6766	49.115	5.6807	12.1778	9.44428	5.8481	2.54797	up
GO:0047977	hepoxilin-epoxide hydrolase activity	molecular_function	7	0.0148734	ENSRNOG00000019183	Alox15	arachidonate 15-lipoxygenase [Source:RGD Symbol;Acc:70493]	3.17012	1.75927	2.65063	3.59856	4.73835	17.0034	0.299129	-1.74116	down
GO:0042018	interleukin-22 receptor activity	molecular_function	7	0.0148734	ENSRNOG00000012259	Il22ra2	interleukin 22 receptor subunit alpha 2 [Source:RGD Symbol;Acc:1303169]	0.262024	0.379088	0.267647	0.746875	0.470208	3.56018	0.190226	-2.39421	down
GO:1990843	subsarcolemmal mitochondrion	cellular_component	7	0.0148734	ENSRNOG00000004473	Ppargc1a	PPARG coactivator 1 alpha [Source:RGD Symbol;Acc:620925]	0.699099	0.733841	0.380414	1.53806	1.6784	1.50382	0.384163	-1.38021	down
GO:0018601	4-nitrophenol 2-monooxygenase activity	molecular_function	7	0.0148734	ENSRNOG00000012458	Cyp2e1	cytochrome P450, family 2, subfamily e, polypeptide 1 [Source:RGD Symbol;Acc:2475]	1.59029	2.0422	0.503894	5.70974	4.74285	4.83838	0.270512	-1.88624	down
GO:0071402	cellular response to lipoprotein particle stimulus	biological_process	5	0.0148734	ENSRNOG00000007159	Ccl2	C-C motif chemokine ligand 2 [Source:RGD Symbol;Acc:3645]	37.7066	18.9936	41.8423	1.13671	3.71253	3.7896	11.4069	3.51183	up
GO:0003069	acetylcholine-mediated vasodilation involved in regulation of systemic arterial blood pressure	biological_process	8	0.0148734	ENSRNOG00000019048	Sod2	superoxide dismutase 2 [Source:RGD Symbol;Acc:3732]	144.337	78.5731	208.619	40.7461	61.5904	73.5054	2.45407	1.29518	up
GO:0003032	detection of oxygen	biological_process	6	0.0148734	ENSRNOG00000019048	Sod2	superoxide dismutase 2 [Source:RGD Symbol;Acc:3732]	144.337	78.5731	208.619	40.7461	61.5904	73.5054	2.45407	1.29518	up
GO:0051021	GDP-dissociation inhibitor binding	molecular_function	5	0.0148734	ENSRNOG00000019433	Rab3a	RAB3A, member RAS oncogene family [Source:RGD Symbol;Acc:3528]	5.25359	6.66674	3.95532	13.6283	11.8968	8.19245	0.470843	-1.08668	down
GO:0070091	glucagon secretion	biological_process	11	0.0148734	ENSRNOG00000010278	Il6	interleukin 6 [Source:RGD Symbol;Acc:2901]	3.16485	2.11915	11.0231	0.105601	0.098662	0.045109	65.3927	6.03106	up
GO:0007622	rhythmic behavior	biological_process	4	0.0148734	ENSRNOG00000000640	Egr2	early growth response 2 [Source:RGD Symbol;Acc:621608]	3.15739	6.1992	6.47142	1.3654	1.96587	0.959568	3.68879	1.88315	up
GO:0001300	chronological cell aging	biological_process	6	0.0148734	ENSRNOG00000001414	Serpine1	serpin family E member 1 [Source:RGD Symbol;Acc:3249]	55.409	67.7847	164.683	17.9559	19.5535	21.1919	4.90409	2.29399	up
GO:0072599	establishment of protein localization to endoplasmic reticulum	biological_process	9	0.0148734	ENSRNOG00000017060	Ryr2	ryanodine receptor 2 [Source:RGD Symbol;Acc:620314]	0.186399	0.211602	0.108926	0.285075	0.300051	1.47817	0.245687	-2.0251	down
GO:0072240	metanephric DCT cell differentiation	biological_process	8	0.0148734	ENSRNOG00000038909	Pou3f3	POU class 3 homeobox 3 [Source:RGD Symbol;Acc:619768]	0	1.4154	0	0	0	0	4718.01	12.204	up
GO:0045852	pH elevation	biological_process	11	0.0148734	ENSRNOG00000020951	Slc4a1	solute carrier family 4 member 1 (Diego blood group) [Source:RGD Symbol;Acc:3710]	0.638523	0.746664	0.545707	1.90142	2.54942	4.14042	0.224751	-2.1536	down
GO:1901860	positive regulation of mitochondrial DNA metabolic process	biological_process	10	0.0148734	ENSRNOG00000004473	Ppargc1a	PPARG coactivator 1 alpha [Source:RGD Symbol;Acc:620925]	0.699099	0.733841	0.380414	1.53806	1.6784	1.50382	0.384163	-1.38021	down
GO:0003050	regulation of systemic arterial blood pressure by atrial natriuretic peptide	biological_process	9	0.0148734	ENSRNOG00000002302	Corin	corin, serine peptidase [Source:RGD Symbol;Acc:727887]	0.106521	0.316943	0.05572	0.485884	0.896918	1.82259	0.149493	-2.74185	down
GO:0004790	thioether S-methyltransferase activity	molecular_function	8	0.0148734	ENSRNOG00000011250	Inmt	indolethylamine N-methyltransferase [Source:RGD Symbol;Acc:1597087]	3.66093	5.49999	4.98651	16.9182	9.65093	12.8462	0.358932	-1.47822	down
GO:0042466	chemokinesis	biological_process	6	0.0148734	ENSRNOG00000007159	Ccl2	C-C motif chemokine ligand 2 [Source:RGD Symbol;Acc:3645]	37.7066	18.9936	41.8423	1.13671	3.71253	3.7896	11.4069	3.51183	up
GO:1903906	regulation of plasma membrane raft polarization	biological_process	7	0.0148734	ENSRNOG00000018991	Gsn	gelsolin [Source:RGD Symbol;Acc:1303089]	421.812	450.543	281.254	941.528	460.793	1133.21	0.454977	-1.13614	down
GO:0045380	positive regulation of interleukin-17 biosynthetic process	biological_process	9	0.0148734	ENSRNOG00000010278	Il6	interleukin 6 [Source:RGD Symbol;Acc:2901]	3.16485	2.11915	11.0231	0.105601	0.098662	0.045109	65.3927	6.03106	up
GO:0045210	FasL biosynthetic process	biological_process	9	0.0148734	ENSRNOG00000004019	Phlda1	pleckstrin homology-like domain, family A, member 1 [Source:RGD Symbol;Acc:3836]	47.7094	63.3599	78.1339	21.0113	27.2595	23.7429	2.62733	1.39359	up
GO:0071855	neuropeptide receptor binding	molecular_function	7	0.0148734	ENSRNOG00000008176	Nppa	natriuretic peptide A [Source:RGD Symbol;Acc:3193]	0	0	0	0	0	4.77912	6.27731e-05	-13.9595	down
GO:0051871	dihydrofolic acid binding	molecular_function	7	0.0148734	ENSRNOG00000013521	Dhfr	dihydrofolate reductase [Source:RGD Symbol;Acc:2500]	4.22122	4.13326	5.03549	1.90962	1.4482	2.93528	2.12772	1.08931	up
GO:1901676	positive regulation of histone H3-K27 acetylation	biological_process	12	0.0148734	ENSRNOG00000007002	Lif	LIF, interleukin 6 family cytokine [Source:RGD Symbol;Acc:620865]	2.79472	2.7336	5.46239	0.880568	1.01865	1.04408	3.73414	1.90078	up
GO:1902680	positive regulation of RNA biosynthetic process	biological_process	9	0.0148734	ENSRNOG00000004649	Il1b	interleukin 1 beta [Source:RGD Symbol;Acc:2891]	17.0922	15.7097	15.266	6.22867	5.3594	4.98742	2.89994	1.53602	up
GO:0099551	trans-synaptic signaling by neuropeptide, modulating synaptic transmission	biological_process	9	0.0148734	ENSRNOG00000018839	Ntrk2	neurotrophic receptor tyrosine kinase 2 [Source:RGD Symbol;Acc:3213]	2.74908	5.01041	5.1754	1.89725	0.712652	1.98932	2.81241	1.49181	up
GO:0097017	renal protein absorption	biological_process	7	0.0148734	ENSRNOG00000018991	Gsn	gelsolin [Source:RGD Symbol;Acc:1303089]	421.812	450.543	281.254	941.528	460.793	1133.21	0.454977	-1.13614	down
GO:1903786	regulation of glutathione biosynthetic process	biological_process	8	0.0148734	ENSRNOG00000010210	Slc7a11	solute carrier family 7 member 11 [Source:RGD Symbol;Acc:1309275]	0.785658	0.686638	0.778759	0.116861	0.130128	0.355379	3.73701	1.90188	up
GO:0031751	D4 dopamine receptor binding	molecular_function	8	0.0148734	ENSRNOG00000028404	Ppp1r1b	protein phosphatase 1, regulatory (inhibitor) subunit 1B [Source:RGD Symbol;Acc:621859]	7.76903	6.02664	5.6708	22.4231	7.67647	15.2862	0.428911	-1.22125	down
GO:1901331	positive regulation of odontoblast differentiation	biological_process	9	0.0148734	ENSRNOG00000001414	Serpine1	serpin family E member 1 [Source:RGD Symbol;Acc:3249]	55.409	67.7847	164.683	17.9559	19.5535	21.1919	4.90409	2.29399	up
GO:0042108	positive regulation of cytokine biosynthetic process	biological_process	8	0.0148734	ENSRNOG00000002771	Ereg	epiregulin [Source:RGD Symbol;Acc:620299]	3.53527	6.81166	10.5663	1.17724	1.04308	1.27508	5.98307	2.58089	up
GO:0005152	interleukin-1 receptor antagonist activity	molecular_function	7	0.0148734	ENSRNOG00000005871	Il1rn	interleukin 1 receptor antagonist [Source:RGD Symbol;Acc:621159]	38.7998	25.085	37.5114	15.4297	14.5177	9.55624	2.56675	1.35995	up
GO:0090500	endocardial cushion to mesenchymal transition	biological_process	9	0.0148734	ENSRNOG00000004854	Has2	hyaluronan synthase 2 [Source:RGD Symbol;Acc:2781]	0.632455	0.404069	0.485014	0.116629	0.11933	0.20685	3.4361	1.78077	up
GO:0045917	positive regulation of complement activation	biological_process	8	0.0148734	ENSRNOG00000004649	Il1b	interleukin 1 beta [Source:RGD Symbol;Acc:2891]	17.0922	15.7097	15.266	6.22867	5.3594	4.98742	2.89994	1.53602	up
GO:0009098	leucine biosynthetic process	biological_process	11	0.0148734	ENSRNOG00000015514	Bcat1	branched chain amino acid transaminase 1 [Source:RGD Symbol;Acc:2195]	12.5295	6.97787	11.6416	3.05441	3.50371	6.92907	2.30952	1.2076	up
GO:0086037	sodium:potassium-exchanging ATPase activity involved in regulation of cardiac muscle cell membrane potential	molecular_function	12	0.0148734	ENSRNOG00000020263	Atp1a3	ATPase Na+/K+ transporting subunit alpha 3 [Source:RGD Symbol;Acc:2169]	1.61757	1.90245	1.13016	0.671541	0.692308	0.956255	2.0043	1.0031	up
GO:0002041	intussusceptive angiogenesis	biological_process	6	0.0148734	ENSRNOG00000014350	Ccn1	cellular communication network factor 1 [Source:RGD Symbol;Acc:620763]	80.4142	168.259	87.5866	30.0122	51.2155	26.7196	3.11503	1.63925	up
GO:0035998	7,8-dihydroneopterin 3'-triphosphate biosynthetic process	biological_process	7	0.0148734	ENSRNOG00000011039	Gch1	GTP cyclohydrolase 1 [Source:RGD Symbol;Acc:61992]	24.2456	21.4661	37.719	10.8419	15.8192	13.7037	2.06692	1.04748	up
GO:0006127	glycerophosphate shuttle	biological_process	6	0.0148734	ENSRNOG00000056457	Gpd1	glycerol-3-phosphate dehydrogenase 1 [Source:RGD Symbol;Acc:621381]	11.7425	9.46065	12.8299	18.8796	16.7739	36.6629	0.470613	-1.08739	down
GO:0004146	dihydrofolate reductase activity	molecular_function	7	0.0148734	ENSRNOG00000013521	Dhfr	dihydrofolate reductase [Source:RGD Symbol;Acc:2500]	4.22122	4.13326	5.03549	1.90962	1.4482	2.93528	2.12772	1.08931	up
GO:0016711	flavonoid 3'-monooxygenase activity	molecular_function	7	0.0148734	ENSRNOG00000019500	Cyp1a1	cytochrome P450, family 1, subfamily a, polypeptide 1 [Source:RGD Symbol;Acc:2458]	3.79747	8.76837	3.6107	28.2685	25.6761	8.90865	0.25737	-1.95808	down
GO:0046439	L-cysteine metabolic process	biological_process	11	0.0148734	ENSRNOG00000000158	Cdo1	cysteine dioxygenase type 1 [Source:RGD Symbol;Acc:69262]	13.6117	16.2309	8.62663	48.0212	33.1986	69.6373	0.255005	-1.9714	down
GO:0002541	activation of plasma proteins involved in acute inflammatory response	biological_process	9	0.0148734	ENSRNOG00000011800	F3	coagulation factor III, tissue factor [Source:RGD Symbol;Acc:2587]	167.292	169.907	352.923	78.9706	86.6779	136.29	2.28564	1.1926	up
GO:0001912	positive regulation of leukocyte mediated cytotoxicity	biological_process	7	0.0148734	ENSRNOG00000007159	Ccl2	C-C motif chemokine ligand 2 [Source:RGD Symbol;Acc:3645]	37.7066	18.9936	41.8423	1.13671	3.71253	3.7896	11.4069	3.51183	up
GO:0033029	regulation of neutrophil apoptotic process	biological_process	6	0.0148734	ENSRNOG00000010210	Slc7a11	solute carrier family 7 member 11 [Source:RGD Symbol;Acc:1309275]	0.785658	0.686638	0.778759	0.116861	0.130128	0.355379	3.73701	1.90188	up
GO:0046186	acetaldehyde biosynthetic process	biological_process	7	0.0148734	ENSRNOG00000012436	Adh6	alcohol dehydrogenase 1 (class I) [Source:RGD Symbol;Acc:2044]	3.44215	4.16162	1.57908	6.77746	7.28181	9.62364	0.387742	-1.36683	down
GO:0045352	interleukin-1 type I receptor antagonist activity	molecular_function	8	0.0148734	ENSRNOG00000005871	Il1rn	interleukin 1 receptor antagonist [Source:RGD Symbol;Acc:621159]	38.7998	25.085	37.5114	15.4297	14.5177	9.55624	2.56675	1.35995	up
GO:0061044	negative regulation of vascular wound healing	biological_process	9	0.0148734	ENSRNOG00000001414	Serpine1	serpin family E member 1 [Source:RGD Symbol;Acc:3249]	55.409	67.7847	164.683	17.9559	19.5535	21.1919	4.90409	2.29399	up
GO:0001315	age-dependent response to reactive oxygen species	biological_process	7	0.0148734	ENSRNOG00000019048	Sod2	superoxide dismutase 2 [Source:RGD Symbol;Acc:3732]	144.337	78.5731	208.619	40.7461	61.5904	73.5054	2.45407	1.29518	up
GO:0043250	sodium-dependent organic anion transmembrane transporter activity	molecular_function	8	0.0148734	ENSRNOG00000002057	Slc10a6	solute carrier family 10 member 6 [Source:RGD Symbol;Acc:727800]	3.96106	4.88697	5.25415	12.9457	9.46746	7.50803	0.471311	-1.08525	down
GO:0010963	regulation of L-arginine import	biological_process	9	0.0148734	ENSRNOG00000013304	Arg1	arginase 1 [Source:RGD Symbol;Acc:2150]	38.2968	26.0177	49.9768	8.35733	12.4054	14.4375	3.24689	1.69906	up
GO:0021660	rhombomere 3 formation	biological_process	6	0.0148734	ENSRNOG00000000640	Egr2	early growth response 2 [Source:RGD Symbol;Acc:621608]	3.15739	6.1992	6.47142	1.3654	1.96587	0.959568	3.68879	1.88315	up
GO:0034440	lipid oxidation	biological_process	8	0.0148734	ENSRNOG00000025691	Pla2g7	phospholipase A2 group VII [Source:RGD Symbol;Acc:1310734]	10.9129	7.49608	7.40635	1.91299	2.90558	5.81907	2.42679	1.27905	up
GO:0061670	evoked neurotransmitter secretion	biological_process	7	0.0148734	ENSRNOG00000019433	Rab3a	RAB3A, member RAS oncogene family [Source:RGD Symbol;Acc:3528]	5.25359	6.66674	3.95532	13.6283	11.8968	8.19245	0.470843	-1.08668	down
GO:0047988	hydroxyacid-oxoacid transhydrogenase activity	molecular_function	6	0.0148734	ENSRNOG00000007069	Adhfe1	alcohol dehydrogenase, iron containing, 1 [Source:RGD Symbol;Acc:1308863]	1.33406	1.55771	0.55276	4.76899	1.84642	4.43534	0.311701	-1.68176	down
GO:0140206	dipeptide import across plasma membrane	biological_process	12	0.0148734	ENSRNOG00000010210	Slc7a11	solute carrier family 7 member 11 [Source:RGD Symbol;Acc:1309275]	0.785658	0.686638	0.778759	0.116861	0.130128	0.355379	3.73701	1.90188	up
GO:0042017	interleukin-22 binding	molecular_function	6	0.0148734	ENSRNOG00000012259	Il22ra2	interleukin 22 receptor subunit alpha 2 [Source:RGD Symbol;Acc:1303169]	0.262024	0.379088	0.267647	0.746875	0.470208	3.56018	0.190226	-2.39421	down
GO:0005147	oncostatin-M receptor binding	molecular_function	7	0.0148734	ENSRNOG00000024390	Osm	oncostatin M [Source:RGD Symbol;Acc:1585012]	2.84715	2.66279	2.36715	1.03466	0.790956	0.679723	3.14413	1.65266	up
GO:0086029	Purkinje myocyte to ventricular cardiac muscle cell signaling	biological_process	7	0.0148734	ENSRNOG00000017060	Ryr2	ryanodine receptor 2 [Source:RGD Symbol;Acc:620314]	0.186399	0.211602	0.108926	0.285075	0.300051	1.47817	0.245687	-2.0251	down
GO:0034441	plasma lipoprotein particle oxidation	biological_process	9	0.0148734	ENSRNOG00000025691	Pla2g7	phospholipase A2 group VII [Source:RGD Symbol;Acc:1310734]	10.9129	7.49608	7.40635	1.91299	2.90558	5.81907	2.42679	1.27905	up
GO:1904635	positive regulation of glomerular visceral epithelial cell apoptotic process	biological_process	11	0.0148734	ENSRNOG00000004473	Ppargc1a	PPARG coactivator 1 alpha [Source:RGD Symbol;Acc:620925]	0.699099	0.733841	0.380414	1.53806	1.6784	1.50382	0.384163	-1.38021	down
GO:0003934	GTP cyclohydrolase I activity	molecular_function	9	0.0148734	ENSRNOG00000011039	Gch1	GTP cyclohydrolase 1 [Source:RGD Symbol;Acc:61992]	24.2456	21.4661	37.719	10.8419	15.8192	13.7037	2.06692	1.04748	up
GO:0050828	regulation of liquid surface tension	biological_process	6	0.0148734	ENSRNOG00000013859	Bpifa1	BPI fold containing family A, member 1 [Source:RGD Symbol;Acc:619818]	1.77021	0.810251	0.062944	0.423531	0.205181	928.063	0.00284637	-8.45666	down
GO:0015680	protein maturation by copper ion transfer	biological_process	8	0.0148734	ENSRNOG00000012878	Atp7b	ATPase copper transporting beta [Source:RGD Symbol;Acc:2180]	0.320325	0.146971	0.19402	0.561531	0.322591	3.50668	0.150614	-2.73107	down
GO:0061772	xenobiotic transport across blood-nerve barrier	biological_process	7	0.0148734	ENSRNOG00000001926	Cldn1	claudin 1 [Source:RGD Symbol;Acc:68422]	0.854451	0.532531	0.439747	1.41622	1.43284	1.98282	0.378057	-1.40332	down
GO:0007192	adenylate cyclase-activating serotonin receptor signaling pathway	biological_process	9	0.0148734	ENSRNOG00000018827	LOC103694905	5-hydroxytryptamine receptor 7 [Source:RGD Symbol;Acc:9265298]	0.601136	0.302224	0.67299	0.0940072	0.184716	0.168906	3.52156	1.81621	up
GO:0032996	Bcl3-Bcl10 complex	cellular_component	4	0.0148734	ENSRNOG00000043416	Bcl3	BCL3, transcription coactivator [Source:RGD Symbol;Acc:1589465]	16.3829	10.3304	23.1764	5.68874	5.93954	6.44326	2.76067	1.46502	up
GO:1901494	regulation of cysteine metabolic process	biological_process	10	0.0148734	ENSRNOG00000010210	Slc7a11	solute carrier family 7 member 11 [Source:RGD Symbol;Acc:1309275]	0.785658	0.686638	0.778759	0.116861	0.130128	0.355379	3.73701	1.90188	up
GO:0099500	vesicle fusion to plasma membrane	biological_process	8	0.0148734	ENSRNOG00000022239	Trarg1	trafficking regulator of GLUT4 (SLC2A4) 1 [Source:RGD Symbol;Acc:1307639]	4.0732	4.20618	3.13567	7.29171	5.20973	13.9028	0.432319	-1.20983	down
GO:0036306	embryonic heart tube elongation	biological_process	5	0.0148734	ENSRNOG00000016181	Tbx20	T-box 20 [Source:RGD Symbol;Acc:1309396]	0	0	0	0	0	0.778032	0.000385588	-11.3407	down
GO:0031449	regulation of slow-twitch skeletal muscle fiber contraction	biological_process	12	0.0148734	ENSRNOG00000016983	Myh7	myosin heavy chain 7 [Source:RGD Symbol;Acc:62030]	0	0.002143	0	0.00806	0.008274	5.03787	0.000424004	-11.2036	down
GO:0051622	negative regulation of norepinephrine uptake	biological_process	7	0.0148734	ENSRNOG00000008656	Snca	synuclein alpha [Source:RGD Symbol;Acc:3729]	0.033831	0	0.067124	0.192924	0.624332	0.823897	0.0615147	-4.02293	down
GO:0017172	cysteine dioxygenase activity	molecular_function	7	0.0148734	ENSRNOG00000000158	Cdo1	cysteine dioxygenase type 1 [Source:RGD Symbol;Acc:69262]	13.6117	16.2309	8.62663	48.0212	33.1986	69.6373	0.255005	-1.9714	down
GO:1902204	positive regulation of hepatocyte growth factor receptor signaling pathway	biological_process	9	0.0148734	ENSRNOG00000010797	Esm1	endothelial cell-specific molecule 1 [Source:RGD Symbol;Acc:71013]	0.637304	0.835068	0.784875	3.70227	1.94073	1.20847	0.329454	-1.60185	down
GO:1903545	cellular response to butyrate	biological_process	8	0.0148734	ENSRNOG00000001926	Cldn1	claudin 1 [Source:RGD Symbol;Acc:68422]	0.854451	0.532531	0.439747	1.41622	1.43284	1.98282	0.378057	-1.40332	down
GO:0048773	erythrophore differentiation	biological_process	7	0.0148734	ENSRNOG00000019048	Sod2	superoxide dismutase 2 [Source:RGD Symbol;Acc:3732]	144.337	78.5731	208.619	40.7461	61.5904	73.5054	2.45407	1.29518	up
GO:0060175	brain-derived neurotrophic factor-activated receptor activity	molecular_function	10	0.0148734	ENSRNOG00000018839	Ntrk2	neurotrophic receptor tyrosine kinase 2 [Source:RGD Symbol;Acc:3213]	2.74908	5.01041	5.1754	1.89725	0.712652	1.98932	2.81241	1.49181	up
GO:0019547	arginine catabolic process to ornithine	biological_process	13	0.0148734	ENSRNOG00000013304	Arg1	arginase 1 [Source:RGD Symbol;Acc:2150]	38.2968	26.0177	49.9768	8.35733	12.4054	14.4375	3.24689	1.69906	up
GO:0009099	valine biosynthetic process	biological_process	11	0.0148734	ENSRNOG00000015514	Bcat1	branched chain amino acid transaminase 1 [Source:RGD Symbol;Acc:2195]	12.5295	6.97787	11.6416	3.05441	3.50371	6.92907	2.30952	1.2076	up
GO:1904639	cellular response to resveratrol	biological_process	8	0.0148734	ENSRNOG00000004473	Ppargc1a	PPARG coactivator 1 alpha [Source:RGD Symbol;Acc:620925]	0.699099	0.733841	0.380414	1.53806	1.6784	1.50382	0.384163	-1.38021	down
GO:0043251	sodium-dependent organic anion transport	biological_process	9	0.0148734	ENSRNOG00000002057	Slc10a6	solute carrier family 10 member 6 [Source:RGD Symbol;Acc:727800]	3.96106	4.88697	5.25415	12.9457	9.46746	7.50803	0.471311	-1.08525	down
GO:0002246	wound healing involved in inflammatory response	biological_process	7	0.0148734	ENSRNOG00000014117	Hmox1	heme oxygenase 1 [Source:RGD Symbol;Acc:2806]	551.077	151.281	396.168	31.9406	70.2869	56.3487	6.92743	2.79232	up
GO:0003175	tricuspid valve development	biological_process	7	0.0148734	ENSRNOG00000016181	Tbx20	T-box 20 [Source:RGD Symbol;Acc:1309396]	0	0	0	0	0	0.778032	0.000385588	-11.3407	down
GO:0045353	interleukin-1 type II receptor antagonist activity	molecular_function	8	0.0148734	ENSRNOG00000005871	Il1rn	interleukin 1 receptor antagonist [Source:RGD Symbol;Acc:621159]	38.7998	25.085	37.5114	15.4297	14.5177	9.55624	2.56675	1.35995	up
GO:0031325	positive regulation of cellular metabolic process	biological_process	7	0.0148734	ENSRNOG00000004473	Ppargc1a	PPARG coactivator 1 alpha [Source:RGD Symbol;Acc:620925]	0.699099	0.733841	0.380414	1.53806	1.6784	1.50382	0.384163	-1.38021	down
GO:1990844	interfibrillar mitochondrion	cellular_component	7	0.0148734	ENSRNOG00000004473	Ppargc1a	PPARG coactivator 1 alpha [Source:RGD Symbol;Acc:620925]	0.699099	0.733841	0.380414	1.53806	1.6784	1.50382	0.384163	-1.38021	down
GO:0032769	negative regulation of monooxygenase activity	biological_process	8	0.0148734	ENSRNOG00000008656	Snca	synuclein alpha [Source:RGD Symbol;Acc:3729]	0.033831	0	0.067124	0.192924	0.624332	0.823897	0.0615147	-4.02293	down
GO:1903280	negative regulation of calcium:sodium antiporter activity	biological_process	9	0.0148734	ENSRNOG00000007290	Atp1a2	ATPase Na+/K+ transporting subunit alpha 2 [Source:RGD Symbol;Acc:2168]	1.11361	2.2107	0.439613	6.02731	3.2216	13.5037	0.165429	-2.59572	down
GO:0006539	glutamate catabolic process via 2-oxoglutarate	biological_process	10	0.0148734	ENSRNOG00000007069	Adhfe1	alcohol dehydrogenase, iron containing, 1 [Source:RGD Symbol;Acc:1308863]	1.33406	1.55771	0.55276	4.76899	1.84642	4.43534	0.311701	-1.68176	down
GO:0005151	interleukin-1, type II receptor binding	molecular_function	8	0.0148734	ENSRNOG00000005871	Il1rn	interleukin 1 receptor antagonist [Source:RGD Symbol;Acc:621159]	38.7998	25.085	37.5114	15.4297	14.5177	9.55624	2.56675	1.35995	up
GO:0051249	regulation of lymphocyte activation	biological_process	7	0.0148734	ENSRNOG00000028250	Lax1	lymphocyte transmembrane adaptor 1 [Source:RGD Symbol;Acc:1563522]	2.42339	2.90581	1.50243	6.54694	3.8691	8.02388	0.370481	-1.43253	down
GO:1903170	negative regulation of calcium ion transmembrane transport	biological_process	10	0.0148734	ENSRNOG00000007290	Atp1a2	ATPase Na+/K+ transporting subunit alpha 2 [Source:RGD Symbol;Acc:2168]	1.11361	2.2107	0.439613	6.02731	3.2216	13.5037	0.165429	-2.59572	down
GO:0002581	negative regulation of antigen processing and presentation of peptide or polysaccharide antigen via MHC class II	biological_process	8	0.0148734	ENSRNOG00000045829	Thbs1	thrombospondin 1 [Source:RGD Symbol;Acc:1588455]	69.4641	106.372	164.303	44.915	55.3273	28.7153	2.6376	1.39923	up
GO:0043509	activin A complex	cellular_component	5	0.0148734	ENSRNOG00000014320	Inhba	inhibin subunit beta A [Source:RGD Symbol;Acc:62074]	1.43305	0.871656	0.743097	0.137745	0.416838	0.219709	3.93625	1.97682	up
GO:2000184	positive regulation of progesterone biosynthetic process	biological_process	11	0.0148734	ENSRNOG00000004473	Ppargc1a	PPARG coactivator 1 alpha [Source:RGD Symbol;Acc:620925]	0.699099	0.733841	0.380414	1.53806	1.6784	1.50382	0.384163	-1.38021	down
GO:0097577	sequestering of iron ion	biological_process	6	0.0148734	ENSRNOG00000013973	Lcn2	lipocalin 2 [Source:RGD Symbol;Acc:69408]	1594.83	895.005	2315.86	399.193	738.611	424.407	3.07622	1.62116	up
GO:0035505	positive regulation of myosin light chain kinase activity	biological_process	13	0.0148734	ENSRNOG00000004649	Il1b	interleukin 1 beta [Source:RGD Symbol;Acc:2891]	17.0922	15.7097	15.266	6.22867	5.3594	4.98742	2.89994	1.53602	up
GO:0090265	positive regulation of immune complex clearance by monocytes and macrophages	biological_process	8	0.0148734	ENSRNOG00000007159	Ccl2	C-C motif chemokine ligand 2 [Source:RGD Symbol;Acc:3645]	37.7066	18.9936	41.8423	1.13671	3.71253	3.7896	11.4069	3.51183	up
GO:0052356	catabolism by host of symbiont cell wall chitin	biological_process	11	0.0148734	ENSRNOG00000033162	Chia	chitinase, acidic [Source:RGD Symbol;Acc:1303058]	315.521	274.274	276.963	62.7794	110.055	141.399	2.75832	1.46379	up
GO:0072236	metanephric loop of Henle development	biological_process	9	0.0148734	ENSRNOG00000038909	Pou3f3	POU class 3 homeobox 3 [Source:RGD Symbol;Acc:619768]	0	1.4154	0	0	0	0	4718.01	12.204	up
GO:0035821	modification of morphology or physiology of other organism	biological_process	5	0.0148734	ENSRNOG00000011483	S100a9	S100 calcium binding protein A9 [Source:RGD Symbol;Acc:620267]	111.507	62.986	76.8319	20.221	25.7548	22.6237	3.66366	1.87329	up
GO:1903909	regulation of receptor clustering	biological_process	9	0.0148734	ENSRNOG00000018991	Gsn	gelsolin [Source:RGD Symbol;Acc:1303089]	421.812	450.543	281.254	941.528	460.793	1133.21	0.454977	-1.13614	down
GO:1903923	positive regulation of protein processing in phagocytic vesicle	biological_process	11	0.0148734	ENSRNOG00000018991	Gsn	gelsolin [Source:RGD Symbol;Acc:1303089]	421.812	450.543	281.254	941.528	460.793	1133.21	0.454977	-1.13614	down
GO:0034395	regulation of transcription from RNA polymerase II promoter in response to iron	biological_process	10	0.0148734	ENSRNOG00000014117	Hmox1	heme oxygenase 1 [Source:RGD Symbol;Acc:2806]	551.077	151.281	396.168	31.9406	70.2869	56.3487	6.92743	2.79232	up
GO:0035358	regulation of peroxisome proliferator activated receptor signaling pathway	biological_process	8	0.0148734	ENSRNOG00000019183	Alox15	arachidonate 15-lipoxygenase [Source:RGD Symbol;Acc:70493]	3.17012	1.75927	2.65063	3.59856	4.73835	17.0034	0.299129	-1.74116	down
GO:0060332	positive regulation of response to interferon-gamma	biological_process	9	0.0148734	ENSRNOG00000018257	Hpx	hemopexin [Source:RGD Symbol;Acc:62040]	4.72321	3.68476	5.32204	2.45627	1.66849	2.5683	2.05138	1.03659	up
GO:0045819	positive regulation of glycogen catabolic process	biological_process	11	0.0148734	ENSRNOG00000004400	Avpr1a	arginine vasopressin receptor 1A [Source:RGD Symbol;Acc:2185]	0.884247	0.991065	0.583946	1.63749	2.34024	1.80556	0.425235	-1.23367	down
GO:0071387	cellular response to cortisol stimulus	biological_process	7	0.0148734	ENSRNOG00000014215	Klf9	Kruppel-like factor 9 [Source:RGD Symbol;Acc:70934]	11.9358	17.8583	12.2313	37.3234	29.1884	19.113	0.490808	-1.02677	down
GO:1904307	response to desipramine	biological_process	7	0.0148734	ENSRNOG00000008656	Snca	synuclein alpha [Source:RGD Symbol;Acc:3729]	0.033831	0	0.067124	0.192924	0.624332	0.823897	0.0615147	-4.02293	down
GO:1990079	cartilage homeostasis	biological_process	8	0.0148734	ENSRNOG00000028108	Cytl1	cytokine like 1 [Source:RGD Symbol;Acc:1561846]	8.96537	10.6967	4.90505	15.0077	11.8637	34.7568	0.398635	-1.32686	down
GO:0010517	regulation of phospholipase activity	biological_process	8	0.0148734	ENSRNOG00000008656	Snca	synuclein alpha [Source:RGD Symbol;Acc:3729]	0.033831	0	0.067124	0.192924	0.624332	0.823897	0.0615147	-4.02293	down
GO:0060559	positive regulation of calcidiol 1-monooxygenase activity	biological_process	9	0.0148734	ENSRNOG00000004649	Il1b	interleukin 1 beta [Source:RGD Symbol;Acc:2891]	17.0922	15.7097	15.266	6.22867	5.3594	4.98742	2.89994	1.53602	up
GO:0051066	dihydrobiopterin metabolic process	biological_process	7	0.0148734	ENSRNOG00000011039	Gch1	GTP cyclohydrolase 1 [Source:RGD Symbol;Acc:61992]	24.2456	21.4661	37.719	10.8419	15.8192	13.7037	2.06692	1.04748	up
GO:1901074	regulation of engulfment of apoptotic cell	biological_process	9	0.0148734	ENSRNOG00000019183	Alox15	arachidonate 15-lipoxygenase [Source:RGD Symbol;Acc:70493]	3.17012	1.75927	2.65063	3.59856	4.73835	17.0034	0.299129	-1.74116	down
GO:0060739	mesenchymal-epithelial cell signaling involved in prostate gland development	biological_process	4	0.0148734	ENSRNOG00000058645	Tnc	tenascin C [Source:RGD Symbol;Acc:621057]	32.8819	24.6221	38.6851	10.8562	17.6057	12.6766	2.33817	1.22538	up
GO:0043540	6-phosphofructo-2-kinase/fructose-2,6-biphosphatase complex	cellular_component	7	0.0148734	ENSRNOG00000000165	Pfkfb1	6-phosphofructo-2-kinase/fructose-2,6-biphosphatase 1 [Source:RGD Symbol;Acc:3307]	1.11783	0.881053	0.727267	4.38349	2.08208	3.12985	0.284109	-1.81548	down
GO:0043924	suramin binding	molecular_function	5	0.0148734	ENSRNOG00000017060	Ryr2	ryanodine receptor 2 [Source:RGD Symbol;Acc:620314]	0.186399	0.211602	0.108926	0.285075	0.300051	1.47817	0.245687	-2.0251	down
GO:0035491	positive regulation of leukotriene production involved in inflammatory response	biological_process	10	0.0148734	ENSRNOG00000001414	Serpine1	serpin family E member 1 [Source:RGD Symbol;Acc:3249]	55.409	67.7847	164.683	17.9559	19.5535	21.1919	4.90409	2.29399	up
GO:0071250	cellular response to nitrite	biological_process	7	0.0148734	ENSRNOG00000004473	Ppargc1a	PPARG coactivator 1 alpha [Source:RGD Symbol;Acc:620925]	0.699099	0.733841	0.380414	1.53806	1.6784	1.50382	0.384163	-1.38021	down
GO:0033233	regulation of protein sumoylation	biological_process	10	0.0148734	ENSRNOG00000019422	Egr1	early growth response 1 [Source:RGD Symbol;Acc:2544]	28.8778	81.6766	49.115	5.6807	12.1778	9.44428	5.8481	2.54797	up
GO:0036345	platelet maturation	biological_process	6	0.0148734	ENSRNOG00000025074	Fgg	fibrinogen gamma chain [Source:RGD Symbol;Acc:2613]	127.794	78.6948	180.988	61.9913	70.073	37.5544	2.2844	1.19181	up
GO:0070576	vitamin D 24-hydroxylase activity	molecular_function	5	0.0148734	ENSRNOG00000019500	Cyp1a1	cytochrome P450, family 1, subfamily a, polypeptide 1 [Source:RGD Symbol;Acc:2458]	3.79747	8.76837	3.6107	28.2685	25.6761	8.90865	0.25737	-1.95808	down
GO:0046880	regulation of follicle-stimulating hormone secretion	biological_process	9	0.0148734	ENSRNOG00000014320	Inhba	inhibin subunit beta A [Source:RGD Symbol;Acc:62074]	1.43305	0.871656	0.743097	0.137745	0.416838	0.219709	3.93625	1.97682	up
GO:0051585	negative regulation of dopamine uptake involved in synaptic transmission	biological_process	11	0.0148734	ENSRNOG00000008656	Snca	synuclein alpha [Source:RGD Symbol;Acc:3729]	0.033831	0	0.067124	0.192924	0.624332	0.823897	0.0615147	-4.02293	down
GO:0046469	platelet activating factor metabolic process	biological_process	9	0.0148734	ENSRNOG00000025691	Pla2g7	phospholipase A2 group VII [Source:RGD Symbol;Acc:1310734]	10.9129	7.49608	7.40635	1.91299	2.90558	5.81907	2.42679	1.27905	up
GO:0010043	response to zinc ion	biological_process	7	0.0149936	ENSRNOG00000011557	S100a8	S100 calcium binding protein A8 [Source:RGD Symbol;Acc:620265]	58.764	26.4357	40.8193	6.86219	14.8878	7.83776	4.25916	2.09057	up
GO:0010043	response to zinc ion	biological_process	7	0.0149936	ENSRNOG00000013304	Arg1	arginase 1 [Source:RGD Symbol;Acc:2150]	38.2968	26.0177	49.9768	8.35733	12.4054	14.4375	3.24689	1.69906	up
GO:0010043	response to zinc ion	biological_process	7	0.0149936	ENSRNOG00000019048	Sod2	superoxide dismutase 2 [Source:RGD Symbol;Acc:3732]	144.337	78.5731	208.619	40.7461	61.5904	73.5054	2.45407	1.29518	up
GO:0051879	Hsp90 protein binding	molecular_function	6	0.0149936	ENSRNOG00000012458	Cyp2e1	cytochrome P450, family 2, subfamily e, polypeptide 1 [Source:RGD Symbol;Acc:2475]	1.59029	2.0422	0.503894	5.70974	4.74285	4.83838	0.270512	-1.88624	down
GO:0051879	Hsp90 protein binding	molecular_function	6	0.0149936	ENSRNOG00000014448	Arntl	aryl hydrocarbon receptor nuclear translocator-like [Source:RGD Symbol;Acc:62003]	7.69285	5.52374	7.07682	4.26659	2.17754	3.16265	2.1124	1.07889	up
GO:0051879	Hsp90 protein binding	molecular_function	6	0.0149936	ENSRNOG00000019500	Cyp1a1	cytochrome P450, family 1, subfamily a, polypeptide 1 [Source:RGD Symbol;Acc:2458]	3.79747	8.76837	3.6107	28.2685	25.6761	8.90865	0.25737	-1.95808	down
GO:0043434	response to peptide hormone	biological_process	6	0.0151393	ENSRNOG00000002754	Areg	amphiregulin [Source:RGD Symbol;Acc:2149]	15.0098	32.3225	41.5271	8.39391	7.3053	7.32716	3.85902	1.94824	up
GO:0043434	response to peptide hormone	biological_process	6	0.0151393	ENSRNOG00000002771	Ereg	epiregulin [Source:RGD Symbol;Acc:620299]	3.53527	6.81166	10.5663	1.17724	1.04308	1.27508	5.98307	2.58089	up
GO:0043434	response to peptide hormone	biological_process	6	0.0151393	ENSRNOG00000010208	Timp1	TIMP metallopeptidase inhibitor 1 [Source:RGD Symbol;Acc:621675]	191.725	124.836	377.443	58.9436	79.8218	69.1842	3.33737	1.73871	up
GO:0043434	response to peptide hormone	biological_process	6	0.0151393	ENSRNOG00000013304	Arg1	arginase 1 [Source:RGD Symbol;Acc:2150]	38.2968	26.0177	49.9768	8.35733	12.4054	14.4375	3.24689	1.69906	up
GO:0034097	response to cytokine	biological_process	6	0.0151393	ENSRNOG00000002723	Sele	selectin E [Source:RGD Symbol;Acc:3654]	2.98187	1.19921	3.6168	0.148222	0.414433	0.461137	7.61667	2.92916	up
GO:0034097	response to cytokine	biological_process	6	0.0151393	ENSRNOG00000010208	Timp1	TIMP metallopeptidase inhibitor 1 [Source:RGD Symbol;Acc:621675]	191.725	124.836	377.443	58.9436	79.8218	69.1842	3.33737	1.73871	up
GO:0034097	response to cytokine	biological_process	6	0.0151393	ENSRNOG00000010278	Il6	interleukin 6 [Source:RGD Symbol;Acc:2901]	3.16485	2.11915	11.0231	0.105601	0.098662	0.045109	65.3927	6.03106	up
GO:0034097	response to cytokine	biological_process	6	0.0151393	ENSRNOG00000033192	Osmr	oncostatin M receptor [Source:RGD Symbol;Acc:1302983]	11.718	9.37308	19.7537	4.6298	7.5865	6.30735	2.20501	1.14079	up
GO:0031115	negative regulation of microtubule polymerization	biological_process	10	0.0154295	ENSRNOG00000008656	Snca	synuclein alpha [Source:RGD Symbol;Acc:3729]	0.033831	0	0.067124	0.192924	0.624332	0.823897	0.0615147	-4.02293	down
GO:0031115	negative regulation of microtubule polymerization	biological_process	10	0.0154295	ENSRNOG00000019361	Inpp5j	inositol polyphosphate-5-phosphatase J [Source:RGD Symbol;Acc:620541]	0.503451	0.569211	0.51729	1.00663	1.27581	1.02692	0.48044	-1.05757	down
GO:0004745	retinol dehydrogenase activity	molecular_function	7	0.0154295	ENSRNOG00000012436	Adh6	alcohol dehydrogenase 1 (class I) [Source:RGD Symbol;Acc:2044]	3.44215	4.16162	1.57908	6.77746	7.28181	9.62364	0.387742	-1.36683	down
GO:0004745	retinol dehydrogenase activity	molecular_function	7	0.0154295	ENSRNOG00000058568	Dhrs9	dehydrogenase/reductase 9 [Source:RGD Symbol;Acc:620655]	9.49096	6.67188	18.1665	1.17878	2.82958	3.45117	4.60207	2.20228	up
GO:0035994	response to muscle stretch	biological_process	6	0.0154295	ENSRNOG00000017060	Ryr2	ryanodine receptor 2 [Source:RGD Symbol;Acc:620314]	0.186399	0.211602	0.108926	0.285075	0.300051	1.47817	0.245687	-2.0251	down
GO:0035994	response to muscle stretch	biological_process	6	0.0154295	ENSRNOG00000018598	Ankrd1	ankyrin repeat domain 1 [Source:RGD Symbol;Acc:61989]	107.023	107.496	209.618	52.1948	92.124	57.3024	2.10363	1.07288	up
GO:0051693	actin filament capping	biological_process	10	0.0154295	ENSRNOG00000006911	Sptb	spectrin, beta, erythrocytic [Source:RGD Symbol;Acc:1303243]	0.235205	0.252763	0.222021	0.570131	0.443805	1.02519	0.348183	-1.52208	down
GO:0051693	actin filament capping	biological_process	10	0.0154295	ENSRNOG00000018991	Gsn	gelsolin [Source:RGD Symbol;Acc:1303089]	421.812	450.543	281.254	941.528	460.793	1133.21	0.454977	-1.13614	down
GO:0050884	neuromuscular process controlling posture	biological_process	7	0.0154295	ENSRNOG00000005944	Slurp1	secreted Ly6/Plaur domain containing 1 [Source:RGD Symbol;Acc:1308768]	5.49258	1.6078	5.19726	0.125839	0.800363	0.417785	9.15011	3.19379	up
GO:0050884	neuromuscular process controlling posture	biological_process	7	0.0154295	ENSRNOG00000011039	Gch1	GTP cyclohydrolase 1 [Source:RGD Symbol;Acc:61992]	24.2456	21.4661	37.719	10.8419	15.8192	13.7037	2.06692	1.04748	up
GO:0008392	arachidonic acid epoxygenase activity	molecular_function	7	0.0154295	ENSRNOG00000012458	Cyp2e1	cytochrome P450, family 2, subfamily e, polypeptide 1 [Source:RGD Symbol;Acc:2475]	1.59029	2.0422	0.503894	5.70974	4.74285	4.83838	0.270512	-1.88624	down
GO:0008392	arachidonic acid epoxygenase activity	molecular_function	7	0.0154295	ENSRNOG00000028891	Cyp2t1	cytochrome P450, family 2, subfamily t, polypeptide 1 [Source:RGD Symbol;Acc:620086]	2.88466	3.24066	2.34437	4.17459	4.32691	8.6706	0.493224	-1.01969	down
GO:0033762	response to glucagon	biological_process	7	0.0154295	ENSRNOG00000000158	Cdo1	cysteine dioxygenase type 1 [Source:RGD Symbol;Acc:69262]	13.6117	16.2309	8.62663	48.0212	33.1986	69.6373	0.255005	-1.9714	down
GO:0033762	response to glucagon	biological_process	7	0.0154295	ENSRNOG00000000165	Pfkfb1	6-phosphofructo-2-kinase/fructose-2,6-biphosphatase 1 [Source:RGD Symbol;Acc:3307]	1.11783	0.881053	0.727267	4.38349	2.08208	3.12985	0.284109	-1.81548	down
GO:0014912	negative regulation of smooth muscle cell migration	biological_process	9	0.0154295	ENSRNOG00000001414	Serpine1	serpin family E member 1 [Source:RGD Symbol;Acc:3249]	55.409	67.7847	164.683	17.9559	19.5535	21.1919	4.90409	2.29399	up
GO:0014912	negative regulation of smooth muscle cell migration	biological_process	9	0.0154295	ENSRNOG00000004473	Ppargc1a	PPARG coactivator 1 alpha [Source:RGD Symbol;Acc:620925]	0.699099	0.733841	0.380414	1.53806	1.6784	1.50382	0.384163	-1.38021	down
GO:0035810	positive regulation of urine volume	biological_process	7	0.0154295	ENSRNOG00000004400	Avpr1a	arginine vasopressin receptor 1A [Source:RGD Symbol;Acc:2185]	0.884247	0.991065	0.583946	1.63749	2.34024	1.80556	0.425235	-1.23367	down
GO:0035810	positive regulation of urine volume	biological_process	7	0.0154295	ENSRNOG00000004854	Has2	hyaluronan synthase 2 [Source:RGD Symbol;Acc:2781]	0.632455	0.404069	0.485014	0.116629	0.11933	0.20685	3.4361	1.78077	up
GO:0030169	low-density lipoprotein particle binding	molecular_function	7	0.0154295	ENSRNOG00000012779	Msr1	macrophage scavenger receptor 1 [Source:RGD Symbol;Acc:1564316]	12.1959	9.51486	9.14382	4.2104	4.34232	6.3628	2.06862	1.04867	up
GO:0030169	low-density lipoprotein particle binding	molecular_function	7	0.0154295	ENSRNOG00000045829	Thbs1	thrombospondin 1 [Source:RGD Symbol;Acc:1588455]	69.4641	106.372	164.303	44.915	55.3273	28.7153	2.6376	1.39923	up
GO:0003700	DNA-binding transcription factor activity	molecular_function	4	0.0155113	ENSRNOG00000000640	Egr2	early growth response 2 [Source:RGD Symbol;Acc:621608]	3.15739	6.1992	6.47142	1.3654	1.96587	0.959568	3.68879	1.88315	up
GO:0003700	DNA-binding transcription factor activity	molecular_function	4	0.0155113	ENSRNOG00000002456	Hlf	HLF transcription factor, PAR bZIP family member [Source:RGD Symbol;Acc:1582828]	2.24187	2.70773	1.96198	5.66715	7.0465	4.85039	0.393508	-1.34554	down
GO:0003700	DNA-binding transcription factor activity	molecular_function	4	0.0155113	ENSRNOG00000003745	Atf3	activating transcription factor 3 [Source:RGD Symbol;Acc:2165]	10.4013	37.4337	46.2986	3.78197	4.08518	7.17428	6.25829	2.64577	up
GO:0003700	DNA-binding transcription factor activity	molecular_function	4	0.0155113	ENSRNOG00000004537	Rxrg	retinoid X receptor gamma [Source:RGD Symbol;Acc:620046]	0.784535	1.26834	0.531943	2.96272	1.86653	2.04611	0.375954	-1.41137	down
GO:0003700	DNA-binding transcription factor activity	molecular_function	4	0.0155113	ENSRNOG00000008529	Foxs1	forkhead box S1 [Source:RGD Symbol;Acc:1310679]	7.77912	5.37593	8.16711	2.87759	3.54175	1.83461	2.58327	1.3692	up
GO:0003700	DNA-binding transcription factor activity	molecular_function	4	0.0155113	ENSRNOG00000011668	Nfil3	nuclear factor, interleukin 3 regulated [Source:RGD Symbol;Acc:620972]	8.36549	8.08717	16.2594	4.32403	3.116	5.24537	2.57872	1.36665	up
GO:0003700	DNA-binding transcription factor activity	molecular_function	4	0.0155113	ENSRNOG00000014448	Arntl	aryl hydrocarbon receptor nuclear translocator-like [Source:RGD Symbol;Acc:62003]	7.69285	5.52374	7.07682	4.26659	2.17754	3.16265	2.1124	1.07889	up
GO:0003700	DNA-binding transcription factor activity	molecular_function	4	0.0155113	ENSRNOG00000016181	Tbx20	T-box 20 [Source:RGD Symbol;Acc:1309396]	0	0	0	0	0	0.778032	0.000385588	-11.3407	down
GO:0003700	DNA-binding transcription factor activity	molecular_function	4	0.0155113	ENSRNOG00000017808	Klf15	Kruppel-like factor 15 [Source:RGD Symbol;Acc:70918]	4.0834	7.67358	3.25876	24.0662	14.6325	13.7301	0.286403	-1.80388	down
GO:0003700	DNA-binding transcription factor activity	molecular_function	4	0.0155113	ENSRNOG00000018830	Aff3	AF4/FMR2 family, member 3 [Source:RGD Symbol;Acc:1308527]	1.8427	2.20691	1.43681	4.81985	3.16028	3.06711	0.496632	-1.00975	down
GO:0003700	DNA-binding transcription factor activity	molecular_function	4	0.0155113	ENSRNOG00000019383	Tef	TEF transcription factor, PAR bZIP family member [Source:RGD Symbol;Acc:3841]	23.7942	29.9373	18.417	43.5098	55.0498	60.271	0.454249	-1.13845	down
GO:0003700	DNA-binding transcription factor activity	molecular_function	4	0.0155113	ENSRNOG00000019422	Egr1	early growth response 1 [Source:RGD Symbol;Acc:2544]	28.8778	81.6766	49.115	5.6807	12.1778	9.44428	5.8481	2.54797	up
GO:0003700	DNA-binding transcription factor activity	molecular_function	4	0.0155113	ENSRNOG00000021027	Dbp	D-box binding PAR bZIP transcription factor [Source:RGD Symbol;Acc:2491]	8.27444	13.9751	6.57459	23.8057	42.1863	32.955	0.291308	-1.77938	down
GO:0003700	DNA-binding transcription factor activity	molecular_function	4	0.0155113	ENSRNOG00000029980	Zbtb16	zinc finger and BTB domain containing 16 [Source:RGD Symbol;Acc:727921]	2.73773	1.60881	0.909087	49.7177	4.1456	27.6044	0.0645117	-3.95429	down
GO:0003700	DNA-binding transcription factor activity	molecular_function	4	0.0155113	ENSRNOG00000038909	Pou3f3	POU class 3 homeobox 3 [Source:RGD Symbol;Acc:619768]	0	1.4154	0	0	0	0	4718.01	12.204	up
GO:0003700	DNA-binding transcription factor activity	molecular_function	4	0.0155113	ENSRNOG00000042838	Junb	JunB proto-oncogene, AP-1 transcription factor subunit [Source:RGD Symbol;Acc:2944]	78.6986	148.666	117.666	59.4441	49.5459	34.9588	2.39689	1.26117	up
GO:0003700	DNA-binding transcription factor activity	molecular_function	4	0.0155113	ENSRNOG00000046667	Fosb	FosB proto-oncogene, AP-1 transcription factor subunit [Source:RGD Symbol;Acc:1308198]	4.40301	29.0803	28.1312	2.28038	1.38324	1.99461	10.8894	3.44485	up
GO:0003700	DNA-binding transcription factor activity	molecular_function	4	0.0155113	ENSRNOG00000056135	Tsc22d3	TSC22 domain family, member 3 [Source:RGD Symbol;Acc:621654]	57.766	152.794	102.695	277.519	209.106	218.408	0.444313	-1.17035	down
GO:0008236	serine-type peptidase activity	molecular_function	6	0.0156452	ENSRNOG00000021619	Cela3b	chymotrypsin like elastase 3B [Source:RGD Symbol;Acc:1307819]	4.59201	1.0716	1.36544	0.166971	0.241357	0.602875	6.95118	2.79726	up
GO:0008236	serine-type peptidase activity	molecular_function	6	0.0156452	ENSRNOG00000023858	Prss39	protease, serine, 39 [Source:RGD Symbol;Acc:1309276]	0.61737	0.670793	0.291965	1.66844	0.90005	1.6692	0.372875	-1.42324	down
GO:0008236	serine-type peptidase activity	molecular_function	6	0.0156452	ENSRNOG00000030547	Dpp6	dipeptidyl peptidase like 6 [Source:RGD Symbol;Acc:68402]	0.254608	0.311394	0.242856	0.739552	0.535016	0.660784	0.417938	-1.25864	down
GO:0008236	serine-type peptidase activity	molecular_function	6	0.0156452	ENSRNOG00000039698	Prss22	serine protease 22 [Source:RGD Symbol;Acc:1310880]	4.82992	3.06223	7.18291	0.201666	0.87817	2.2045	4.58999	2.19849	up
GO:0008236	serine-type peptidase activity	molecular_function	6	0.0156452	ENSRNOG00000046764	Tmprss11a	transmembrane serine protease 11A [Source:RGD Symbol;Acc:1596322]	0	0	0	0	0	9.5822	3.1308e-05	-14.9631	down
GO:0008236	serine-type peptidase activity	molecular_function	6	0.0156452	ENSRNOG00000051158	Cfb	complement factor B [Source:RGD Symbol;Acc:2204]	504.105	354.647	440.239	134.428	208.694	220.508	2.30469	1.20457	up
GO:0071277	cellular response to calcium ion	biological_process	8	0.0159484	ENSRNOG00000015397	Cpne7	copine 7 [Source:RGD Symbol;Acc:1307466]	3.08981	2.75198	1.57435	4.3	4.72936	7.48087	0.449185	-1.15462	down
GO:0071277	cellular response to calcium ion	biological_process	8	0.0159484	ENSRNOG00000019183	Alox15	arachidonate 15-lipoxygenase [Source:RGD Symbol;Acc:70493]	3.17012	1.75927	2.65063	3.59856	4.73835	17.0034	0.299129	-1.74116	down
GO:0071277	cellular response to calcium ion	biological_process	8	0.0159484	ENSRNOG00000042838	Junb	JunB proto-oncogene, AP-1 transcription factor subunit [Source:RGD Symbol;Acc:2944]	78.6986	148.666	117.666	59.4441	49.5459	34.9588	2.39689	1.26117	up
GO:0071277	cellular response to calcium ion	biological_process	8	0.0159484	ENSRNOG00000046667	Fosb	FosB proto-oncogene, AP-1 transcription factor subunit [Source:RGD Symbol;Acc:1308198]	4.40301	29.0803	28.1312	2.28038	1.38324	1.99461	10.8894	3.44485	up
GO:0071310	cellular response to organic substance	biological_process	6	0.0161804	ENSRNOG00000000640	Egr2	early growth response 2 [Source:RGD Symbol;Acc:621608]	3.15739	6.1992	6.47142	1.3654	1.96587	0.959568	3.68879	1.88315	up
GO:0071310	cellular response to organic substance	biological_process	6	0.0161804	ENSRNOG00000004649	Il1b	interleukin 1 beta [Source:RGD Symbol;Acc:2891]	17.0922	15.7097	15.266	6.22867	5.3594	4.98742	2.89994	1.53602	up
GO:0071310	cellular response to organic substance	biological_process	6	0.0161804	ENSRNOG00000019422	Egr1	early growth response 1 [Source:RGD Symbol;Acc:2544]	28.8778	81.6766	49.115	5.6807	12.1778	9.44428	5.8481	2.54797	up
GO:0010811	positive regulation of cell-substrate adhesion	biological_process	7	0.0161804	ENSRNOG00000014350	Ccn1	cellular communication network factor 1 [Source:RGD Symbol;Acc:620763]	80.4142	168.259	87.5866	30.0122	51.2155	26.7196	3.11503	1.63925	up
GO:0010811	positive regulation of cell-substrate adhesion	biological_process	7	0.0161804	ENSRNOG00000019183	Alox15	arachidonate 15-lipoxygenase [Source:RGD Symbol;Acc:70493]	3.17012	1.75927	2.65063	3.59856	4.73835	17.0034	0.299129	-1.74116	down
GO:0010811	positive regulation of cell-substrate adhesion	biological_process	7	0.0161804	ENSRNOG00000045684	LOC100910978	extracellular matrix protein 2-like [Source:RGD Symbol;Acc:6495594]	2.20831	2.37103	1.28465	3.92303	4.91467	5.89374	0.39806	-1.32894	down
GO:0016529	sarcoplasmic reticulum	cellular_component	7	0.0174186	ENSRNOG00000002372	Sgcd	sarcoglycan, delta [Source:RGD Symbol;Acc:1306638]	0.93466	1.49454	1.00184	2.76866	3.11875	2.25635	0.421309	-1.24705	down
GO:0016529	sarcoplasmic reticulum	cellular_component	7	0.0174186	ENSRNOG00000009047	Sln	sarcolipin [Source:RGD Symbol;Acc:1305224]	0.6646	0.889403	0.512004	3.73268	0.95632	42.3216	0.0439477	-4.50807	down
GO:0016529	sarcoplasmic reticulum	cellular_component	7	0.0174186	ENSRNOG00000017060	Ryr2	ryanodine receptor 2 [Source:RGD Symbol;Acc:620314]	0.186399	0.211602	0.108926	0.285075	0.300051	1.47817	0.245687	-2.0251	down
GO:0045597	positive regulation of cell differentiation	biological_process	7	0.0174186	ENSRNOG00000002946	Socs3	suppressor of cytokine signaling 3 [Source:RGD Symbol;Acc:621087]	50.4008	65.1614	87.6908	40.5991	23.2455	16.4051	2.53276	1.34071	up
GO:0045597	positive regulation of cell differentiation	biological_process	7	0.0174186	ENSRNOG00000014350	Ccn1	cellular communication network factor 1 [Source:RGD Symbol;Acc:620763]	80.4142	168.259	87.5866	30.0122	51.2155	26.7196	3.11503	1.63925	up
GO:0045597	positive regulation of cell differentiation	biological_process	7	0.0174186	ENSRNOG00000042838	Junb	JunB proto-oncogene, AP-1 transcription factor subunit [Source:RGD Symbol;Acc:2944]	78.6986	148.666	117.666	59.4441	49.5459	34.9588	2.39689	1.26117	up
GO:0032870	cellular response to hormone stimulus	biological_process	6	0.0174186	ENSRNOG00000004400	Avpr1a	arginine vasopressin receptor 1A [Source:RGD Symbol;Acc:2185]	0.884247	0.991065	0.583946	1.63749	2.34024	1.80556	0.425235	-1.23367	down
GO:0032870	cellular response to hormone stimulus	biological_process	6	0.0174186	ENSRNOG00000004537	Rxrg	retinoid X receptor gamma [Source:RGD Symbol;Acc:620046]	0.784535	1.26834	0.531943	2.96272	1.86653	2.04611	0.375954	-1.41137	down
GO:0032870	cellular response to hormone stimulus	biological_process	6	0.0174186	ENSRNOG00000046667	Fosb	FosB proto-oncogene, AP-1 transcription factor subunit [Source:RGD Symbol;Acc:1308198]	4.40301	29.0803	28.1312	2.28038	1.38324	1.99461	10.8894	3.44485	up
GO:0032570	response to progesterone	biological_process	6	0.0174186	ENSRNOG00000007159	Ccl2	C-C motif chemokine ligand 2 [Source:RGD Symbol;Acc:3645]	37.7066	18.9936	41.8423	1.13671	3.71253	3.7896	11.4069	3.51183	up
GO:0032570	response to progesterone	biological_process	6	0.0174186	ENSRNOG00000012436	Adh6	alcohol dehydrogenase 1 (class I) [Source:RGD Symbol;Acc:2044]	3.44215	4.16162	1.57908	6.77746	7.28181	9.62364	0.387742	-1.36683	down
GO:0032570	response to progesterone	biological_process	6	0.0174186	ENSRNOG00000046667	Fosb	FosB proto-oncogene, AP-1 transcription factor subunit [Source:RGD Symbol;Acc:1308198]	4.40301	29.0803	28.1312	2.28038	1.38324	1.99461	10.8894	3.44485	up
GO:0043274	phospholipase binding	molecular_function	6	0.0178263	ENSRNOG00000002723	Sele	selectin E [Source:RGD Symbol;Acc:3654]	2.98187	1.19921	3.6168	0.148222	0.414433	0.461137	7.61667	2.92916	up
GO:0043274	phospholipase binding	molecular_function	6	0.0178263	ENSRNOG00000008656	Snca	synuclein alpha [Source:RGD Symbol;Acc:3729]	0.033831	0	0.067124	0.192924	0.624332	0.823897	0.0615147	-4.02293	down
GO:0031000	response to caffeine	biological_process	6	0.0178263	ENSRNOG00000010278	Il6	interleukin 6 [Source:RGD Symbol;Acc:2901]	3.16485	2.11915	11.0231	0.105601	0.098662	0.045109	65.3927	6.03106	up
GO:0031000	response to caffeine	biological_process	6	0.0178263	ENSRNOG00000017060	Ryr2	ryanodine receptor 2 [Source:RGD Symbol;Acc:620314]	0.186399	0.211602	0.108926	0.285075	0.300051	1.47817	0.245687	-2.0251	down
GO:0008209	androgen metabolic process	biological_process	7	0.0178263	ENSRNOG00000004473	Ppargc1a	PPARG coactivator 1 alpha [Source:RGD Symbol;Acc:620925]	0.699099	0.733841	0.380414	1.53806	1.6784	1.50382	0.384163	-1.38021	down
GO:0008209	androgen metabolic process	biological_process	7	0.0178263	ENSRNOG00000058568	Dhrs9	dehydrogenase/reductase 9 [Source:RGD Symbol;Acc:620655]	9.49096	6.67188	18.1665	1.17878	2.82958	3.45117	4.60207	2.20228	up
GO:0031674	I band	cellular_component	5	0.0178263	ENSRNOG00000000383	Mypn	myopalladin [Source:RGD Symbol;Acc:1308510]	0.125487	0.178395	0.057137	0.368815	0.264707	0.67526	0.275843	-1.85808	down
GO:0031674	I band	cellular_component	5	0.0178263	ENSRNOG00000018598	Ankrd1	ankyrin repeat domain 1 [Source:RGD Symbol;Acc:61989]	107.023	107.496	209.618	52.1948	92.124	57.3024	2.10363	1.07288	up
GO:0022904	respiratory electron transport chain	biological_process	7	0.0178263	ENSRNOG00000004473	Ppargc1a	PPARG coactivator 1 alpha [Source:RGD Symbol;Acc:620925]	0.699099	0.733841	0.380414	1.53806	1.6784	1.50382	0.384163	-1.38021	down
GO:0022904	respiratory electron transport chain	biological_process	7	0.0178263	ENSRNOG00000019048	Sod2	superoxide dismutase 2 [Source:RGD Symbol;Acc:3732]	144.337	78.5731	208.619	40.7461	61.5904	73.5054	2.45407	1.29518	up
GO:0006883	cellular sodium ion homeostasis	biological_process	11	0.0178263	ENSRNOG00000007290	Atp1a2	ATPase Na+/K+ transporting subunit alpha 2 [Source:RGD Symbol;Acc:2168]	1.11361	2.2107	0.439613	6.02731	3.2216	13.5037	0.165429	-2.59572	down
GO:0006883	cellular sodium ion homeostasis	biological_process	11	0.0178263	ENSRNOG00000020263	Atp1a3	ATPase Na+/K+ transporting subunit alpha 3 [Source:RGD Symbol;Acc:2169]	1.61757	1.90245	1.13016	0.671541	0.692308	0.956255	2.0043	1.0031	up
GO:0016010	dystrophin-associated glycoprotein complex	cellular_component	5	0.0178263	ENSRNOG00000002372	Sgcd	sarcoglycan, delta [Source:RGD Symbol;Acc:1306638]	0.93466	1.49454	1.00184	2.76866	3.11875	2.25635	0.421309	-1.24705	down
GO:0016010	dystrophin-associated glycoprotein complex	cellular_component	5	0.0178263	ENSRNOG00000009779	Krt8	keratin 8 [Source:RGD Symbol;Acc:2984]	228.699	182.557	395.575	110.026	131.871	138.388	2.12165	1.08519	up
GO:0048266	behavioral response to pain	biological_process	4	0.0178263	ENSRNOG00000006639	Scn9a	sodium voltage-gated channel alpha subunit 9 [Source:RGD Symbol;Acc:69368]	0	0	0	0.00415055	0.00708024	0.083853	0.00315511	-8.30809	down
GO:0048266	behavioral response to pain	biological_process	4	0.0178263	ENSRNOG00000018827	LOC103694905	5-hydroxytryptamine receptor 7 [Source:RGD Symbol;Acc:9265298]	0.601136	0.302224	0.67299	0.0940072	0.184716	0.168906	3.52156	1.81621	up
GO:0071260	cellular response to mechanical stimulus	biological_process	6	0.0185369	ENSRNOG00000004649	Il1b	interleukin 1 beta [Source:RGD Symbol;Acc:2891]	17.0922	15.7097	15.266	6.22867	5.3594	4.98742	2.89994	1.53602	up
GO:0071260	cellular response to mechanical stimulus	biological_process	6	0.0185369	ENSRNOG00000007290	Atp1a2	ATPase Na+/K+ transporting subunit alpha 2 [Source:RGD Symbol;Acc:2168]	1.11361	2.2107	0.439613	6.02731	3.2216	13.5037	0.165429	-2.59572	down
GO:0071260	cellular response to mechanical stimulus	biological_process	6	0.0185369	ENSRNOG00000008176	Nppa	natriuretic peptide A [Source:RGD Symbol;Acc:3193]	0	0	0	0	0	4.77912	6.27731e-05	-13.9595	down
GO:0071260	cellular response to mechanical stimulus	biological_process	6	0.0185369	ENSRNOG00000018598	Ankrd1	ankyrin repeat domain 1 [Source:RGD Symbol;Acc:61989]	107.023	107.496	209.618	52.1948	92.124	57.3024	2.10363	1.07288	up
GO:0045892	negative regulation of transcription, DNA-templated	biological_process	9	0.019709	ENSRNOG00000002771	Ereg	epiregulin [Source:RGD Symbol;Acc:620299]	3.53527	6.81166	10.5663	1.17724	1.04308	1.27508	5.98307	2.58089	up
GO:0045892	negative regulation of transcription, DNA-templated	biological_process	9	0.019709	ENSRNOG00000003745	Atf3	activating transcription factor 3 [Source:RGD Symbol;Acc:2165]	10.4013	37.4337	46.2986	3.78197	4.08518	7.17428	6.25829	2.64577	up
GO:0045892	negative regulation of transcription, DNA-templated	biological_process	9	0.019709	ENSRNOG00000006776	Smyd1	SET and MYND domain containing 1 [Source:RGD Symbol;Acc:1305105]	0	0	0	0	0	0.685245	0.0004378	-11.1574	down
GO:0045892	negative regulation of transcription, DNA-templated	biological_process	9	0.019709	ENSRNOG00000008529	Foxs1	forkhead box S1 [Source:RGD Symbol;Acc:1310679]	7.77912	5.37593	8.16711	2.87759	3.54175	1.83461	2.58327	1.3692	up
GO:0045892	negative regulation of transcription, DNA-templated	biological_process	9	0.019709	ENSRNOG00000011668	Nfil3	nuclear factor, interleukin 3 regulated [Source:RGD Symbol;Acc:620972]	8.36549	8.08717	16.2594	4.32403	3.116	5.24537	2.57872	1.36665	up
GO:0045892	negative regulation of transcription, DNA-templated	biological_process	9	0.019709	ENSRNOG00000013074	Wt1	WT1 transcription factor [Source:RGD Symbol;Acc:3974]	6.51322	3.77358	7.11635	1.80892	3.61924	2.35499	2.236	1.16092	up
GO:0045892	negative regulation of transcription, DNA-templated	biological_process	9	0.019709	ENSRNOG00000014448	Arntl	aryl hydrocarbon receptor nuclear translocator-like [Source:RGD Symbol;Acc:62003]	7.69285	5.52374	7.07682	4.26659	2.17754	3.16265	2.1124	1.07889	up
GO:0045892	negative regulation of transcription, DNA-templated	biological_process	9	0.019709	ENSRNOG00000016181	Tbx20	T-box 20 [Source:RGD Symbol;Acc:1309396]	0	0	0	0	0	0.778032	0.000385588	-11.3407	down
GO:0045892	negative regulation of transcription, DNA-templated	biological_process	9	0.019709	ENSRNOG00000018598	Ankrd1	ankyrin repeat domain 1 [Source:RGD Symbol;Acc:61989]	107.023	107.496	209.618	52.1948	92.124	57.3024	2.10363	1.07288	up
GO:0045892	negative regulation of transcription, DNA-templated	biological_process	9	0.019709	ENSRNOG00000020254	Per2	period circadian regulator 2 [Source:RGD Symbol;Acc:61945]	5.08553	8.59563	7.97541	10.986	14.3571	23.4713	0.443651	-1.1725	down
GO:0045892	negative regulation of transcription, DNA-templated	biological_process	9	0.019709	ENSRNOG00000029980	Zbtb16	zinc finger and BTB domain containing 16 [Source:RGD Symbol;Acc:727921]	2.73773	1.60881	0.909087	49.7177	4.1456	27.6044	0.0645117	-3.95429	down
GO:0045892	negative regulation of transcription, DNA-templated	biological_process	9	0.019709	ENSRNOG00000038909	Pou3f3	POU class 3 homeobox 3 [Source:RGD Symbol;Acc:619768]	0	1.4154	0	0	0	0	4718.01	12.204	up
GO:0045892	negative regulation of transcription, DNA-templated	biological_process	9	0.019709	ENSRNOG00000043416	Bcl3	BCL3, transcription coactivator [Source:RGD Symbol;Acc:1589465]	16.3829	10.3304	23.1764	5.68874	5.93954	6.44326	2.76067	1.46502	up
GO:0051017	actin filament bundle assembly	biological_process	6	0.0200493	ENSRNOG00000015903	Add2	adducin 2 [Source:RGD Symbol;Acc:2042]	0.471254	0.687281	0.447776	1.00894	1.70809	1.63371	0.369205	-1.43751	down
GO:0051017	actin filament bundle assembly	biological_process	6	0.0200493	ENSRNOG00000033261	Fam107a	family with sequence similarity 107, member A [Source:RGD Symbol;Acc:1306327]	1.69277	1.16438	0.665421	3.69912	2.16074	4.27099	0.347707	-1.52406	down
GO:0051017	actin filament bundle assembly	biological_process	6	0.0200493	ENSRNOG00000059857	Rnd1	Rho family GTPase 1 [Source:RGD Symbol;Acc:1306338]	27.5036	15.5245	33.0023	7.92626	8.32134	9.04674	3.00583	1.58776	up
GO:0030544	Hsp70 protein binding	molecular_function	6	0.0200493	ENSRNOG00000008656	Snca	synuclein alpha [Source:RGD Symbol;Acc:3729]	0.033831	0	0.067124	0.192924	0.624332	0.823897	0.0615147	-4.02293	down
GO:0030544	Hsp70 protein binding	molecular_function	6	0.0200493	ENSRNOG00000012458	Cyp2e1	cytochrome P450, family 2, subfamily e, polypeptide 1 [Source:RGD Symbol;Acc:2475]	1.59029	2.0422	0.503894	5.70974	4.74285	4.83838	0.270512	-1.88624	down
GO:0030544	Hsp70 protein binding	molecular_function	6	0.0200493	ENSRNOG00000019500	Cyp1a1	cytochrome P450, family 1, subfamily a, polypeptide 1 [Source:RGD Symbol;Acc:2458]	3.79747	8.76837	3.6107	28.2685	25.6761	8.90865	0.25737	-1.95808	down
GO:0071361	cellular response to ethanol	biological_process	7	0.0203693	ENSRNOG00000000239	Ccl7	C-C motif chemokine ligand 7 [Source:RGD Symbol;Acc:1359152]	14.4232	11.1589	18.1968	0.371988	1.4184	3.33763	8.53719	3.09376	up
GO:0071361	cellular response to ethanol	biological_process	7	0.0203693	ENSRNOG00000019048	Sod2	superoxide dismutase 2 [Source:RGD Symbol;Acc:3732]	144.337	78.5731	208.619	40.7461	61.5904	73.5054	2.45407	1.29518	up
GO:0016702	oxidoreductase activity, acting on single donors with incorporation of molecular oxygen, incorporation of two atoms of oxygen	molecular_function	6	0.0203693	ENSRNOG00000000158	Cdo1	cysteine dioxygenase type 1 [Source:RGD Symbol;Acc:69262]	13.6117	16.2309	8.62663	48.0212	33.1986	69.6373	0.255005	-1.9714	down
GO:0016702	oxidoreductase activity, acting on single donors with incorporation of molecular oxygen, incorporation of two atoms of oxygen	molecular_function	6	0.0203693	ENSRNOG00000019183	Alox15	arachidonate 15-lipoxygenase [Source:RGD Symbol;Acc:70493]	3.17012	1.75927	2.65063	3.59856	4.73835	17.0034	0.299129	-1.74116	down
GO:0055117	regulation of cardiac muscle contraction	biological_process	10	0.0203693	ENSRNOG00000007744	Ehd3	EH-domain containing 3 [Source:RGD Symbol;Acc:621762]	3.25928	4.95947	3.3248	14.1598	7.02137	7.48551	0.402681	-1.31229	down
GO:0055117	regulation of cardiac muscle contraction	biological_process	10	0.0203693	ENSRNOG00000017060	Ryr2	ryanodine receptor 2 [Source:RGD Symbol;Acc:620314]	0.186399	0.211602	0.108926	0.285075	0.300051	1.47817	0.245687	-2.0251	down
GO:0090303	positive regulation of wound healing	biological_process	9	0.0203693	ENSRNOG00000001926	Cldn1	claudin 1 [Source:RGD Symbol;Acc:68422]	0.854451	0.532531	0.439747	1.41622	1.43284	1.98282	0.378057	-1.40332	down
GO:0090303	positive regulation of wound healing	biological_process	9	0.0203693	ENSRNOG00000007159	Ccl2	C-C motif chemokine ligand 2 [Source:RGD Symbol;Acc:3645]	37.7066	18.9936	41.8423	1.13671	3.71253	3.7896	11.4069	3.51183	up
GO:0048148	behavioral response to cocaine	biological_process	5	0.0203693	ENSRNOG00000008656	Snca	synuclein alpha [Source:RGD Symbol;Acc:3729]	0.033831	0	0.067124	0.192924	0.624332	0.823897	0.0615147	-4.02293	down
GO:0048148	behavioral response to cocaine	biological_process	5	0.0203693	ENSRNOG00000028404	Ppp1r1b	protein phosphatase 1, regulatory (inhibitor) subunit 1B [Source:RGD Symbol;Acc:621859]	7.76903	6.02664	5.6708	22.4231	7.67647	15.2862	0.428911	-1.22125	down
GO:0008106	alcohol dehydrogenase (NADP+) activity	molecular_function	8	0.0203693	ENSRNOG00000002331	Aldh3a1	aldehyde dehydrogenase 3 family, member A1 [Source:RGD Symbol;Acc:2088]	0.906245	1.33741	0.734843	1.81694	2.09876	14.0727	0.165579	-2.59441	down
GO:0008106	alcohol dehydrogenase (NADP+) activity	molecular_function	8	0.0203693	ENSRNOG00000038319	Akr1c19	aldo-keto reductase family 1, member C19 [Source:RGD Symbol;Acc:1562954]	4.58014	5.43589	2.94887	7.99767	9.39868	9.74826	0.477623	-1.06605	down
GO:0019395	fatty acid oxidation	biological_process	10	0.0203693	ENSRNOG00000004473	Ppargc1a	PPARG coactivator 1 alpha [Source:RGD Symbol;Acc:620925]	0.699099	0.733841	0.380414	1.53806	1.6784	1.50382	0.384163	-1.38021	down
GO:0019395	fatty acid oxidation	biological_process	10	0.0203693	ENSRNOG00000019183	Alox15	arachidonate 15-lipoxygenase [Source:RGD Symbol;Acc:70493]	3.17012	1.75927	2.65063	3.59856	4.73835	17.0034	0.299129	-1.74116	down
GO:0045410	positive regulation of interleukin-6 biosynthetic process	biological_process	9	0.0203693	ENSRNOG00000002771	Ereg	epiregulin [Source:RGD Symbol;Acc:620299]	3.53527	6.81166	10.5663	1.17724	1.04308	1.27508	5.98307	2.58089	up
GO:0045410	positive regulation of interleukin-6 biosynthetic process	biological_process	9	0.0203693	ENSRNOG00000004649	Il1b	interleukin 1 beta [Source:RGD Symbol;Acc:2891]	17.0922	15.7097	15.266	6.22867	5.3594	4.98742	2.89994	1.53602	up
GO:0061036	positive regulation of cartilage development	biological_process	7	0.0203693	ENSRNOG00000014350	Ccn1	cellular communication network factor 1 [Source:RGD Symbol;Acc:620763]	80.4142	168.259	87.5866	30.0122	51.2155	26.7196	3.11503	1.63925	up
GO:0061036	positive regulation of cartilage development	biological_process	7	0.0203693	ENSRNOG00000029980	Zbtb16	zinc finger and BTB domain containing 16 [Source:RGD Symbol;Acc:727921]	2.73773	1.60881	0.909087	49.7177	4.1456	27.6044	0.0645117	-3.95429	down
GO:0005178	integrin binding	molecular_function	6	0.021085	ENSRNOG00000004649	Il1b	interleukin 1 beta [Source:RGD Symbol;Acc:2891]	17.0922	15.7097	15.266	6.22867	5.3594	4.98742	2.89994	1.53602	up
GO:0005178	integrin binding	molecular_function	6	0.021085	ENSRNOG00000006569	Itgb8	integrin subunit beta 8 [Source:RGD Symbol;Acc:1311374]	2.69064	1.81036	3.42008	0.970632	0.984076	0.573387	3.13322	1.64765	up
GO:0005178	integrin binding	molecular_function	6	0.021085	ENSRNOG00000010797	Esm1	endothelial cell-specific molecule 1 [Source:RGD Symbol;Acc:71013]	0.637304	0.835068	0.784875	3.70227	1.94073	1.20847	0.329454	-1.60185	down
GO:0005178	integrin binding	molecular_function	6	0.021085	ENSRNOG00000014350	Ccn1	cellular communication network factor 1 [Source:RGD Symbol;Acc:620763]	80.4142	168.259	87.5866	30.0122	51.2155	26.7196	3.11503	1.63925	up
GO:0005178	integrin binding	molecular_function	6	0.021085	ENSRNOG00000045829	Thbs1	thrombospondin 1 [Source:RGD Symbol;Acc:1588455]	69.4641	106.372	164.303	44.915	55.3273	28.7153	2.6376	1.39923	up
GO:0006694	steroid biosynthetic process	biological_process	7	0.0214421	ENSRNOG00000010208	Timp1	TIMP metallopeptidase inhibitor 1 [Source:RGD Symbol;Acc:621675]	191.725	124.836	377.443	58.9436	79.8218	69.1842	3.33737	1.73871	up
GO:0006694	steroid biosynthetic process	biological_process	7	0.0214421	ENSRNOG00000019120	Hmgcs2	3-hydroxy-3-methylglutaryl-CoA synthase 2 [Source:RGD Symbol;Acc:2804]	5.71888	6.61347	2.53401	17.9587	10.1034	13.6071	0.356771	-1.48693	down
GO:0006694	steroid biosynthetic process	biological_process	7	0.0214421	ENSRNOG00000019500	Cyp1a1	cytochrome P450, family 1, subfamily a, polypeptide 1 [Source:RGD Symbol;Acc:2458]	3.79747	8.76837	3.6107	28.2685	25.6761	8.90865	0.25737	-1.95808	down
GO:0006644	phospholipid metabolic process	biological_process	7	0.0214421	ENSRNOG00000008656	Snca	synuclein alpha [Source:RGD Symbol;Acc:3729]	0.033831	0	0.067124	0.192924	0.624332	0.823897	0.0615147	-4.02293	down
GO:0006644	phospholipid metabolic process	biological_process	7	0.0214421	ENSRNOG00000014117	Hmox1	heme oxygenase 1 [Source:RGD Symbol;Acc:2806]	551.077	151.281	396.168	31.9406	70.2869	56.3487	6.92743	2.79232	up
GO:0006644	phospholipid metabolic process	biological_process	7	0.0214421	ENSRNOG00000016945	Pla2g2a	phospholipase A2 group IIA [Source:RGD Symbol;Acc:620857]	430.776	142.041	305.208	31.8882	19.843	49.1573	8.70292	3.1215	up
GO:0003690	double-stranded DNA binding	molecular_function	7	0.0218591	ENSRNOG00000003486	Mnda	myeloid cell nuclear differentiation antigen [Source:RGD Symbol;Acc:1306089]	26.8462	15.6126	28.5889	8.07711	6.61329	14.254	2.45463	1.2955	up
GO:0003690	double-stranded DNA binding	molecular_function	7	0.0218591	ENSRNOG00000018830	Aff3	AF4/FMR2 family, member 3 [Source:RGD Symbol;Acc:1308527]	1.8427	2.20691	1.43681	4.81985	3.16028	3.06711	0.496632	-1.00975	down
GO:0003690	double-stranded DNA binding	molecular_function	7	0.0218591	ENSRNOG00000019383	Tef	TEF transcription factor, PAR bZIP family member [Source:RGD Symbol;Acc:3841]	23.7942	29.9373	18.417	43.5098	55.0498	60.271	0.454249	-1.13845	down
GO:0003690	double-stranded DNA binding	molecular_function	7	0.0218591	ENSRNOG00000029980	Zbtb16	zinc finger and BTB domain containing 16 [Source:RGD Symbol;Acc:727921]	2.73773	1.60881	0.909087	49.7177	4.1456	27.6044	0.0645117	-3.95429	down
GO:0003690	double-stranded DNA binding	molecular_function	7	0.0218591	ENSRNOG00000046667	Fosb	FosB proto-oncogene, AP-1 transcription factor subunit [Source:RGD Symbol;Acc:1308198]	4.40301	29.0803	28.1312	2.28038	1.38324	1.99461	10.8894	3.44485	up
GO:0071407	cellular response to organic cyclic compound	biological_process	7	0.0223725	ENSRNOG00000004649	Il1b	interleukin 1 beta [Source:RGD Symbol;Acc:2891]	17.0922	15.7097	15.266	6.22867	5.3594	4.98742	2.89994	1.53602	up
GO:0071407	cellular response to organic cyclic compound	biological_process	7	0.0223725	ENSRNOG00000012779	Msr1	macrophage scavenger receptor 1 [Source:RGD Symbol;Acc:1564316]	12.1959	9.51486	9.14382	4.2104	4.34232	6.3628	2.06862	1.04867	up
GO:0071407	cellular response to organic cyclic compound	biological_process	7	0.0223725	ENSRNOG00000018598	Ankrd1	ankyrin repeat domain 1 [Source:RGD Symbol;Acc:61989]	107.023	107.496	209.618	52.1948	92.124	57.3024	2.10363	1.07288	up
GO:0071407	cellular response to organic cyclic compound	biological_process	7	0.0223725	ENSRNOG00000019500	Cyp1a1	cytochrome P450, family 1, subfamily a, polypeptide 1 [Source:RGD Symbol;Acc:2458]	3.79747	8.76837	3.6107	28.2685	25.6761	8.90865	0.25737	-1.95808	down
GO:0030198	extracellular matrix organization	biological_process	6	0.0226515	ENSRNOG00000002640	Serpinb5	serpin family B member 5 [Source:RGD Symbol;Acc:69342]	0	0	0	0	0	0.922211	0.000325305	-11.5859	down
GO:0030198	extracellular matrix organization	biological_process	6	0.0226515	ENSRNOG00000014143	Col24a1	collagen type XXIV alpha 1 chain [Source:RGD Symbol;Acc:1565539]	0.113145	0.123763	0.067519	0.442035	0.327394	0.338754	0.274708	-1.86403	down
GO:0030198	extracellular matrix organization	biological_process	6	0.0226515	ENSRNOG00000014350	Ccn1	cellular communication network factor 1 [Source:RGD Symbol;Acc:620763]	80.4142	168.259	87.5866	30.0122	51.2155	26.7196	3.11503	1.63925	up
GO:0030198	extracellular matrix organization	biological_process	6	0.0226515	ENSRNOG00000045684	LOC100910978	extracellular matrix protein 2-like [Source:RGD Symbol;Acc:6495594]	2.20831	2.37103	1.28465	3.92303	4.91467	5.89374	0.39806	-1.32894	down
GO:0030198	extracellular matrix organization	biological_process	6	0.0226515	ENSRNOG00000051399	Col10a1	collagen type X alpha 1 chain [Source:RGD Symbol;Acc:2371]	0	0.048914	0.043329	0.098932	0.11115	2.12458	0.0395102	-4.66163	down
GO:0002526	acute inflammatory response	biological_process	7	0.0230537	ENSRNOG00000010278	Il6	interleukin 6 [Source:RGD Symbol;Acc:2901]	3.16485	2.11915	11.0231	0.105601	0.098662	0.045109	65.3927	6.03106	up
GO:0002526	acute inflammatory response	biological_process	7	0.0230537	ENSRNOG00000011557	S100a8	S100 calcium binding protein A8 [Source:RGD Symbol;Acc:620265]	58.764	26.4357	40.8193	6.86219	14.8878	7.83776	4.25916	2.09057	up
GO:0071837	HMG box domain binding	molecular_function	6	0.0230537	ENSRNOG00000000640	Egr2	early growth response 2 [Source:RGD Symbol;Acc:621608]	3.15739	6.1992	6.47142	1.3654	1.96587	0.959568	3.68879	1.88315	up
GO:0071837	HMG box domain binding	molecular_function	6	0.0230537	ENSRNOG00000038909	Pou3f3	POU class 3 homeobox 3 [Source:RGD Symbol;Acc:619768]	0	1.4154	0	0	0	0	4718.01	12.204	up
GO:0046928	regulation of neurotransmitter secretion	biological_process	6	0.0230537	ENSRNOG00000008656	Snca	synuclein alpha [Source:RGD Symbol;Acc:3729]	0.033831	0	0.067124	0.192924	0.624332	0.823897	0.0615147	-4.02293	down
GO:0046928	regulation of neurotransmitter secretion	biological_process	6	0.0230537	ENSRNOG00000018839	Ntrk2	neurotrophic receptor tyrosine kinase 2 [Source:RGD Symbol;Acc:3213]	2.74908	5.01041	5.1754	1.89725	0.712652	1.98932	2.81241	1.49181	up
GO:0002009	morphogenesis of an epithelium	biological_process	6	0.0230537	ENSRNOG00000002053	Fras1	Fraser extracellular matrix complex subunit 1 [Source:RGD Symbol;Acc:1306516]	2.36999	3.21564	1.80956	6.31625	6.67886	2.69939	0.471197	-1.0856	down
GO:0002009	morphogenesis of an epithelium	biological_process	6	0.0230537	ENSRNOG00000002640	Serpinb5	serpin family B member 5 [Source:RGD Symbol;Acc:69342]	0	0	0	0	0	0.922211	0.000325305	-11.5859	down
GO:0015108	chloride transmembrane transporter activity	molecular_function	8	0.0230537	ENSRNOG00000020951	Slc4a1	solute carrier family 4 member 1 (Diego blood group) [Source:RGD Symbol;Acc:3710]	0.638523	0.746664	0.545707	1.90142	2.54942	4.14042	0.224751	-2.1536	down
GO:0015108	chloride transmembrane transporter activity	molecular_function	8	0.0230537	ENSRNOG00000058692	Slc26a4	solute carrier family 26 member 4 [Source:RGD Symbol;Acc:3293]	32.2035	26.0783	43.1394	4.03381	8.98354	10.6969	4.27681	2.09653	up
GO:0035584	calcium-mediated signaling using intracellular calcium source	biological_process	8	0.0230537	ENSRNOG00000002794	Selp	selectin P [Source:RGD Symbol;Acc:3656]	3.596	2.43421	6.01392	0.725463	1.69202	1.63187	2.97434	1.57257	up
GO:0035584	calcium-mediated signaling using intracellular calcium source	biological_process	8	0.0230537	ENSRNOG00000017060	Ryr2	ryanodine receptor 2 [Source:RGD Symbol;Acc:620314]	0.186399	0.211602	0.108926	0.285075	0.300051	1.47817	0.245687	-2.0251	down
GO:0006730	one-carbon metabolic process	biological_process	5	0.0230537	ENSRNOG00000008586	Aldh1l2	aldehyde dehydrogenase 1 family, member L2 [Source:RGD Symbol;Acc:1309458]	1.58045	0.639397	1.11351	0.097725	0.378507	0.428929	3.68262	1.88073	up
GO:0006730	one-carbon metabolic process	biological_process	5	0.0230537	ENSRNOG00000013521	Dhfr	dihydrofolate reductase [Source:RGD Symbol;Acc:2500]	4.22122	4.13326	5.03549	1.90962	1.4482	2.93528	2.12772	1.08931	up
GO:0030742	GTP-dependent protein binding	molecular_function	5	0.0230537	ENSRNOG00000011039	Gch1	GTP cyclohydrolase 1 [Source:RGD Symbol;Acc:61992]	24.2456	21.4661	37.719	10.8419	15.8192	13.7037	2.06692	1.04748	up
GO:0030742	GTP-dependent protein binding	molecular_function	5	0.0230537	ENSRNOG00000019433	Rab3a	RAB3A, member RAS oncogene family [Source:RGD Symbol;Acc:3528]	5.25359	6.66674	3.95532	13.6283	11.8968	8.19245	0.470843	-1.08668	down
GO:0000977	RNA polymerase II regulatory region sequence-specific DNA binding	molecular_function	9	0.024178	ENSRNOG00000003745	Atf3	activating transcription factor 3 [Source:RGD Symbol;Acc:2165]	10.4013	37.4337	46.2986	3.78197	4.08518	7.17428	6.25829	2.64577	up
GO:0000977	RNA polymerase II regulatory region sequence-specific DNA binding	molecular_function	9	0.024178	ENSRNOG00000004537	Rxrg	retinoid X receptor gamma [Source:RGD Symbol;Acc:620046]	0.784535	1.26834	0.531943	2.96272	1.86653	2.04611	0.375954	-1.41137	down
GO:0000977	RNA polymerase II regulatory region sequence-specific DNA binding	molecular_function	9	0.024178	ENSRNOG00000011668	Nfil3	nuclear factor, interleukin 3 regulated [Source:RGD Symbol;Acc:620972]	8.36549	8.08717	16.2594	4.32403	3.116	5.24537	2.57872	1.36665	up
GO:0000977	RNA polymerase II regulatory region sequence-specific DNA binding	molecular_function	9	0.024178	ENSRNOG00000016181	Tbx20	T-box 20 [Source:RGD Symbol;Acc:1309396]	0	0	0	0	0	0.778032	0.000385588	-11.3407	down
GO:0000977	RNA polymerase II regulatory region sequence-specific DNA binding	molecular_function	9	0.024178	ENSRNOG00000017808	Klf15	Kruppel-like factor 15 [Source:RGD Symbol;Acc:70918]	4.0834	7.67358	3.25876	24.0662	14.6325	13.7301	0.286403	-1.80388	down
GO:0000977	RNA polymerase II regulatory region sequence-specific DNA binding	molecular_function	9	0.024178	ENSRNOG00000019383	Tef	TEF transcription factor, PAR bZIP family member [Source:RGD Symbol;Acc:3841]	23.7942	29.9373	18.417	43.5098	55.0498	60.271	0.454249	-1.13845	down
GO:0000977	RNA polymerase II regulatory region sequence-specific DNA binding	molecular_function	9	0.024178	ENSRNOG00000019422	Egr1	early growth response 1 [Source:RGD Symbol;Acc:2544]	28.8778	81.6766	49.115	5.6807	12.1778	9.44428	5.8481	2.54797	up
GO:0000977	RNA polymerase II regulatory region sequence-specific DNA binding	molecular_function	9	0.024178	ENSRNOG00000021027	Dbp	D-box binding PAR bZIP transcription factor [Source:RGD Symbol;Acc:2491]	8.27444	13.9751	6.57459	23.8057	42.1863	32.955	0.291308	-1.77938	down
GO:0000977	RNA polymerase II regulatory region sequence-specific DNA binding	molecular_function	9	0.024178	ENSRNOG00000042838	Junb	JunB proto-oncogene, AP-1 transcription factor subunit [Source:RGD Symbol;Acc:2944]	78.6986	148.666	117.666	59.4441	49.5459	34.9588	2.39689	1.26117	up
GO:0071549	cellular response to dexamethasone stimulus	biological_process	7	0.0243828	ENSRNOG00000007159	Ccl2	C-C motif chemokine ligand 2 [Source:RGD Symbol;Acc:3645]	37.7066	18.9936	41.8423	1.13671	3.71253	3.7896	11.4069	3.51183	up
GO:0071549	cellular response to dexamethasone stimulus	biological_process	7	0.0243828	ENSRNOG00000010278	Il6	interleukin 6 [Source:RGD Symbol;Acc:2901]	3.16485	2.11915	11.0231	0.105601	0.098662	0.045109	65.3927	6.03106	up
GO:0071549	cellular response to dexamethasone stimulus	biological_process	7	0.0243828	ENSRNOG00000013304	Arg1	arginase 1 [Source:RGD Symbol;Acc:2150]	38.2968	26.0177	49.9768	8.35733	12.4054	14.4375	3.24689	1.69906	up
GO:0060291	long-term synaptic potentiation	biological_process	10	0.0243828	ENSRNOG00000008656	Snca	synuclein alpha [Source:RGD Symbol;Acc:3729]	0.033831	0	0.067124	0.192924	0.624332	0.823897	0.0615147	-4.02293	down
GO:0060291	long-term synaptic potentiation	biological_process	10	0.0243828	ENSRNOG00000018827	LOC103694905	5-hydroxytryptamine receptor 7 [Source:RGD Symbol;Acc:9265298]	0.601136	0.302224	0.67299	0.0940072	0.184716	0.168906	3.52156	1.81621	up
GO:0060291	long-term synaptic potentiation	biological_process	10	0.0243828	ENSRNOG00000018839	Ntrk2	neurotrophic receptor tyrosine kinase 2 [Source:RGD Symbol;Acc:3213]	2.74908	5.01041	5.1754	1.89725	0.712652	1.98932	2.81241	1.49181	up
GO:0030335	positive regulation of cell migration	biological_process	8	0.0256535	ENSRNOG00000001926	Cldn1	claudin 1 [Source:RGD Symbol;Acc:68422]	0.854451	0.532531	0.439747	1.41622	1.43284	1.98282	0.378057	-1.40332	down
GO:0030335	positive regulation of cell migration	biological_process	8	0.0256535	ENSRNOG00000004649	Il1b	interleukin 1 beta [Source:RGD Symbol;Acc:2891]	17.0922	15.7097	15.266	6.22867	5.3594	4.98742	2.89994	1.53602	up
GO:0030335	positive regulation of cell migration	biological_process	8	0.0256535	ENSRNOG00000004854	Has2	hyaluronan synthase 2 [Source:RGD Symbol;Acc:2781]	0.632455	0.404069	0.485014	0.116629	0.11933	0.20685	3.4361	1.78077	up
GO:0030335	positive regulation of cell migration	biological_process	8	0.0256535	ENSRNOG00000012442	Cemip	cell migration inducing hyaluronidase [Source:RGD Symbol;Acc:1305254]	8.43759	8.09849	13.9832	4.17147	5.86685	2.59443	2.41588	1.27255	up
GO:0030335	positive regulation of cell migration	biological_process	8	0.0256535	ENSRNOG00000014350	Ccn1	cellular communication network factor 1 [Source:RGD Symbol;Acc:620763]	80.4142	168.259	87.5866	30.0122	51.2155	26.7196	3.11503	1.63925	up
GO:0030335	positive regulation of cell migration	biological_process	8	0.0256535	ENSRNOG00000033261	Fam107a	family with sequence similarity 107, member A [Source:RGD Symbol;Acc:1306327]	1.69277	1.16438	0.665421	3.69912	2.16074	4.27099	0.347707	-1.52406	down
GO:0030335	positive regulation of cell migration	biological_process	8	0.0256535	ENSRNOG00000045829	Thbs1	thrombospondin 1 [Source:RGD Symbol;Acc:1588455]	69.4641	106.372	164.303	44.915	55.3273	28.7153	2.6376	1.39923	up
GO:0006801	superoxide metabolic process	biological_process	6	0.0258747	ENSRNOG00000019048	Sod2	superoxide dismutase 2 [Source:RGD Symbol;Acc:3732]	144.337	78.5731	208.619	40.7461	61.5904	73.5054	2.45407	1.29518	up
GO:0006801	superoxide metabolic process	biological_process	6	0.0258747	ENSRNOG00000025117	Noxo1	NADPH oxidase organizer 1 [Source:RGD Symbol;Acc:1307802]	14.7212	8.39042	16.5399	5.13382	4.72603	3.30381	3.0122	1.59082	up
GO:0060716	labyrinthine layer blood vessel development	biological_process	7	0.0258747	ENSRNOG00000014350	Ccn1	cellular communication network factor 1 [Source:RGD Symbol;Acc:620763]	80.4142	168.259	87.5866	30.0122	51.2155	26.7196	3.11503	1.63925	up
GO:0060716	labyrinthine layer blood vessel development	biological_process	7	0.0258747	ENSRNOG00000042838	Junb	JunB proto-oncogene, AP-1 transcription factor subunit [Source:RGD Symbol;Acc:2944]	78.6986	148.666	117.666	59.4441	49.5459	34.9588	2.39689	1.26117	up
GO:0002026	regulation of the force of heart contraction	biological_process	9	0.0258747	ENSRNOG00000007290	Atp1a2	ATPase Na+/K+ transporting subunit alpha 2 [Source:RGD Symbol;Acc:2168]	1.11361	2.2107	0.439613	6.02731	3.2216	13.5037	0.165429	-2.59572	down
GO:0002026	regulation of the force of heart contraction	biological_process	9	0.0258747	ENSRNOG00000016983	Myh7	myosin heavy chain 7 [Source:RGD Symbol;Acc:62030]	0	0.002143	0	0.00806	0.008274	5.03787	0.000424004	-11.2036	down
GO:0015301	anion:anion antiporter activity	molecular_function	8	0.0258747	ENSRNOG00000020951	Slc4a1	solute carrier family 4 member 1 (Diego blood group) [Source:RGD Symbol;Acc:3710]	0.638523	0.746664	0.545707	1.90142	2.54942	4.14042	0.224751	-2.1536	down
GO:0015301	anion:anion antiporter activity	molecular_function	8	0.0258747	ENSRNOG00000058692	Slc26a4	solute carrier family 26 member 4 [Source:RGD Symbol;Acc:3293]	32.2035	26.0783	43.1394	4.03381	8.98354	10.6969	4.27681	2.09653	up
GO:0010996	response to auditory stimulus	biological_process	6	0.0258747	ENSRNOG00000010278	Il6	interleukin 6 [Source:RGD Symbol;Acc:2901]	3.16485	2.11915	11.0231	0.105601	0.098662	0.045109	65.3927	6.03106	up
GO:0010996	response to auditory stimulus	biological_process	6	0.0258747	ENSRNOG00000018839	Ntrk2	neurotrophic receptor tyrosine kinase 2 [Source:RGD Symbol;Acc:3213]	2.74908	5.01041	5.1754	1.89725	0.712652	1.98932	2.81241	1.49181	up
GO:0007155	cell adhesion	biological_process	4	0.0258928	ENSRNOG00000002723	Sele	selectin E [Source:RGD Symbol;Acc:3654]	2.98187	1.19921	3.6168	0.148222	0.414433	0.461137	7.61667	2.92916	up
GO:0007155	cell adhesion	biological_process	4	0.0258928	ENSRNOG00000002794	Selp	selectin P [Source:RGD Symbol;Acc:3656]	3.596	2.43421	6.01392	0.725463	1.69202	1.63187	2.97434	1.57257	up
GO:0007155	cell adhesion	biological_process	4	0.0258928	ENSRNOG00000003546	Tnfrsf12a	TNF receptor superfamily member 12A [Source:RGD Symbol;Acc:631329]	41.3385	35.8452	71.9517	13.9554	16.6142	17.2047	3.12167	1.64232	up
GO:0007155	cell adhesion	biological_process	4	0.0258928	ENSRNOG00000006569	Itgb8	integrin subunit beta 8 [Source:RGD Symbol;Acc:1311374]	2.69064	1.81036	3.42008	0.970632	0.984076	0.573387	3.13322	1.64765	up
GO:0007155	cell adhesion	biological_process	4	0.0258928	ENSRNOG00000010529	Thbs2	thrombospondin 2 [Source:RGD Symbol;Acc:1310979]	16.9175	9.7328	15.9974	2.57939	6.01878	6.82916	2.76443	1.46698	up
GO:0007155	cell adhesion	biological_process	4	0.0258928	ENSRNOG00000013306	Pcdh20	protocadherin 20 [Source:RGD Symbol;Acc:1306297]	0.03651	0.090915	0.036121	0.73992	0.089234	0.231952	0.154128	-2.6978	down
GO:0007155	cell adhesion	biological_process	4	0.0258928	ENSRNOG00000014350	Ccn1	cellular communication network factor 1 [Source:RGD Symbol;Acc:620763]	80.4142	168.259	87.5866	30.0122	51.2155	26.7196	3.11503	1.63925	up
GO:0007155	cell adhesion	biological_process	4	0.0258928	ENSRNOG00000019622	Ackr3	atypical chemokine receptor 3 [Source:RGD Symbol;Acc:620601]	76.304	96.1834	133.552	44.5313	43.6139	45.7138	2.28628	1.193	up
GO:0007155	cell adhesion	biological_process	4	0.0258928	ENSRNOG00000045829	Thbs1	thrombospondin 1 [Source:RGD Symbol;Acc:1588455]	69.4641	106.372	164.303	44.915	55.3273	28.7153	2.6376	1.39923	up
GO:0007155	cell adhesion	biological_process	4	0.0258928	ENSRNOG00000058645	Tnc	tenascin C [Source:RGD Symbol;Acc:621057]	32.8819	24.6221	38.6851	10.8562	17.6057	12.6766	2.33817	1.22538	up
GO:0045893	positive regulation of transcription, DNA-templated	biological_process	9	0.0259025	ENSRNOG00000000640	Egr2	early growth response 2 [Source:RGD Symbol;Acc:621608]	3.15739	6.1992	6.47142	1.3654	1.96587	0.959568	3.68879	1.88315	up
GO:0045893	positive regulation of transcription, DNA-templated	biological_process	9	0.0259025	ENSRNOG00000004473	Ppargc1a	PPARG coactivator 1 alpha [Source:RGD Symbol;Acc:620925]	0.699099	0.733841	0.380414	1.53806	1.6784	1.50382	0.384163	-1.38021	down
GO:0045893	positive regulation of transcription, DNA-templated	biological_process	9	0.0259025	ENSRNOG00000004649	Il1b	interleukin 1 beta [Source:RGD Symbol;Acc:2891]	17.0922	15.7097	15.266	6.22867	5.3594	4.98742	2.89994	1.53602	up
GO:0045893	positive regulation of transcription, DNA-templated	biological_process	9	0.0259025	ENSRNOG00000010278	Il6	interleukin 6 [Source:RGD Symbol;Acc:2901]	3.16485	2.11915	11.0231	0.105601	0.098662	0.045109	65.3927	6.03106	up
GO:0045893	positive regulation of transcription, DNA-templated	biological_process	9	0.0259025	ENSRNOG00000011668	Nfil3	nuclear factor, interleukin 3 regulated [Source:RGD Symbol;Acc:620972]	8.36549	8.08717	16.2594	4.32403	3.116	5.24537	2.57872	1.36665	up
GO:0045893	positive regulation of transcription, DNA-templated	biological_process	9	0.0259025	ENSRNOG00000013074	Wt1	WT1 transcription factor [Source:RGD Symbol;Acc:3974]	6.51322	3.77358	7.11635	1.80892	3.61924	2.35499	2.236	1.16092	up
GO:0045893	positive regulation of transcription, DNA-templated	biological_process	9	0.0259025	ENSRNOG00000014320	Inhba	inhibin subunit beta A [Source:RGD Symbol;Acc:62074]	1.43305	0.871656	0.743097	0.137745	0.416838	0.219709	3.93625	1.97682	up
GO:0045893	positive regulation of transcription, DNA-templated	biological_process	9	0.0259025	ENSRNOG00000014448	Arntl	aryl hydrocarbon receptor nuclear translocator-like [Source:RGD Symbol;Acc:62003]	7.69285	5.52374	7.07682	4.26659	2.17754	3.16265	2.1124	1.07889	up
GO:0045893	positive regulation of transcription, DNA-templated	biological_process	9	0.0259025	ENSRNOG00000016181	Tbx20	T-box 20 [Source:RGD Symbol;Acc:1309396]	0	0	0	0	0	0.778032	0.000385588	-11.3407	down
GO:0045893	positive regulation of transcription, DNA-templated	biological_process	9	0.0259025	ENSRNOG00000017808	Klf15	Kruppel-like factor 15 [Source:RGD Symbol;Acc:70918]	4.0834	7.67358	3.25876	24.0662	14.6325	13.7301	0.286403	-1.80388	down
GO:0045893	positive regulation of transcription, DNA-templated	biological_process	9	0.0259025	ENSRNOG00000019422	Egr1	early growth response 1 [Source:RGD Symbol;Acc:2544]	28.8778	81.6766	49.115	5.6807	12.1778	9.44428	5.8481	2.54797	up
GO:0045893	positive regulation of transcription, DNA-templated	biological_process	9	0.0259025	ENSRNOG00000029980	Zbtb16	zinc finger and BTB domain containing 16 [Source:RGD Symbol;Acc:727921]	2.73773	1.60881	0.909087	49.7177	4.1456	27.6044	0.0645117	-3.95429	down
GO:0045893	positive regulation of transcription, DNA-templated	biological_process	9	0.0259025	ENSRNOG00000038909	Pou3f3	POU class 3 homeobox 3 [Source:RGD Symbol;Acc:619768]	0	1.4154	0	0	0	0	4718.01	12.204	up
GO:0045893	positive regulation of transcription, DNA-templated	biological_process	9	0.0259025	ENSRNOG00000043416	Bcl3	BCL3, transcription coactivator [Source:RGD Symbol;Acc:1589465]	16.3829	10.3304	23.1764	5.68874	5.93954	6.44326	2.76067	1.46502	up
GO:0071392	cellular response to estradiol stimulus	biological_process	7	0.0259307	ENSRNOG00000004473	Ppargc1a	PPARG coactivator 1 alpha [Source:RGD Symbol;Acc:620925]	0.699099	0.733841	0.380414	1.53806	1.6784	1.50382	0.384163	-1.38021	down
GO:0071392	cellular response to estradiol stimulus	biological_process	7	0.0259307	ENSRNOG00000007159	Ccl2	C-C motif chemokine ligand 2 [Source:RGD Symbol;Acc:3645]	37.7066	18.9936	41.8423	1.13671	3.71253	3.7896	11.4069	3.51183	up
GO:0071392	cellular response to estradiol stimulus	biological_process	7	0.0259307	ENSRNOG00000010278	Il6	interleukin 6 [Source:RGD Symbol;Acc:2901]	3.16485	2.11915	11.0231	0.105601	0.098662	0.045109	65.3927	6.03106	up
GO:0098794	postsynapse	cellular_component	4	0.0260062	ENSRNOG00000008656	Snca	synuclein alpha [Source:RGD Symbol;Acc:3729]	0.033831	0	0.067124	0.192924	0.624332	0.823897	0.0615147	-4.02293	down
GO:0098794	postsynapse	cellular_component	4	0.0260062	ENSRNOG00000015903	Add2	adducin 2 [Source:RGD Symbol;Acc:2042]	0.471254	0.687281	0.447776	1.00894	1.70809	1.63371	0.369205	-1.43751	down
GO:0098794	postsynapse	cellular_component	4	0.0260062	ENSRNOG00000018839	Ntrk2	neurotrophic receptor tyrosine kinase 2 [Source:RGD Symbol;Acc:3213]	2.74908	5.01041	5.1754	1.89725	0.712652	1.98932	2.81241	1.49181	up
GO:0098794	postsynapse	cellular_component	4	0.0260062	ENSRNOG00000020263	Atp1a3	ATPase Na+/K+ transporting subunit alpha 3 [Source:RGD Symbol;Acc:2169]	1.61757	1.90245	1.13016	0.671541	0.692308	0.956255	2.0043	1.0031	up
GO:0098794	postsynapse	cellular_component	4	0.0260062	ENSRNOG00000028404	Ppp1r1b	protein phosphatase 1, regulatory (inhibitor) subunit 1B [Source:RGD Symbol;Acc:621859]	7.76903	6.02664	5.6708	22.4231	7.67647	15.2862	0.428911	-1.22125	down
GO:0006952	defense response	biological_process	5	0.0266581	ENSRNOG00000002792	Cxcl2	C-X-C motif chemokine ligand 2 [Source:RGD Symbol;Acc:70069]	2.67869	3.89774	3.91406	0.2245	0.858824	0.310974	7.52384	2.91147	up
GO:0006952	defense response	biological_process	5	0.0266581	ENSRNOG00000002802	Cxcl1	C-X-C motif chemokine ligand 1 [Source:RGD Symbol;Acc:619869]	37.7589	31.9443	77.5216	7.05145	18.0701	6.03944	4.72466	2.24021	up
GO:0006952	defense response	biological_process	5	0.0266581	ENSRNOG00000002843	Cxcl6	C-X-C motif chemokine ligand 6 [Source:RGD Symbol;Acc:708540]	5.43574	1.71607	3.19644	0.056385	0.662585	1.21597	5.34811	2.41903	up
GO:0006952	defense response	biological_process	5	0.0266581	ENSRNOG00000038126	Defb3	beta-defensin 3 [Source:RGD Symbol;Acc:1589572]	2.8242	1.80169	2.32766	0.256909	0.469811	0.738769	4.74487	2.24637	up
GO:0003779	actin binding	molecular_function	6	0.0272311	ENSRNOG00000005555	Lrrc10	leucine-rich repeat-containing protein 10-like [Source:RGD Symbol;Acc:6495036]	0	0	0	0	0	3.58154	8.37629e-05	-13.5433	down
GO:0003779	actin binding	molecular_function	6	0.0272311	ENSRNOG00000006911	Sptb	spectrin, beta, erythrocytic [Source:RGD Symbol;Acc:1303243]	0.235205	0.252763	0.222021	0.570131	0.443805	1.02519	0.348183	-1.52208	down
GO:0003779	actin binding	molecular_function	6	0.0272311	ENSRNOG00000008656	Snca	synuclein alpha [Source:RGD Symbol;Acc:3729]	0.033831	0	0.067124	0.192924	0.624332	0.823897	0.0615147	-4.02293	down
GO:0003779	actin binding	molecular_function	6	0.0272311	ENSRNOG00000015903	Add2	adducin 2 [Source:RGD Symbol;Acc:2042]	0.471254	0.687281	0.447776	1.00894	1.70809	1.63371	0.369205	-1.43751	down
GO:0003779	actin binding	molecular_function	6	0.0272311	ENSRNOG00000016983	Myh7	myosin heavy chain 7 [Source:RGD Symbol;Acc:62030]	0	0.002143	0	0.00806	0.008274	5.03787	0.000424004	-11.2036	down
GO:0003779	actin binding	molecular_function	6	0.0272311	ENSRNOG00000018991	Gsn	gelsolin [Source:RGD Symbol;Acc:1303089]	421.812	450.543	281.254	941.528	460.793	1133.21	0.454977	-1.13614	down
GO:0003779	actin binding	molecular_function	6	0.0272311	ENSRNOG00000033261	Fam107a	family with sequence similarity 107, member A [Source:RGD Symbol;Acc:1306327]	1.69277	1.16438	0.665421	3.69912	2.16074	4.27099	0.347707	-1.52406	down
GO:0003779	actin binding	molecular_function	6	0.0272311	ENSRNOG00000034258	Xirp2	xin actin-binding repeat containing 2 [Source:RGD Symbol;Acc:1302980]	0	0	0	0	0	0.448301	0.000669193	-10.5453	down
GO:0003779	actin binding	molecular_function	6	0.0272311	ENSRNOG00000049607	LOC100911101	leucine-rich repeat-containing 10 [Source:RGD Symbol;Acc:1307358]	0	0	0	0	0	4.63893	6.46701e-05	-13.9165	down
GO:0001540	amyloid-beta binding	molecular_function	6	0.0275301	ENSRNOG00000012779	Msr1	macrophage scavenger receptor 1 [Source:RGD Symbol;Acc:1564316]	12.1959	9.51486	9.14382	4.2104	4.34232	6.3628	2.06862	1.04867	up
GO:0001540	amyloid-beta binding	molecular_function	6	0.0275301	ENSRNOG00000020263	Atp1a3	ATPase Na+/K+ transporting subunit alpha 3 [Source:RGD Symbol;Acc:2169]	1.61757	1.90245	1.13016	0.671541	0.692308	0.956255	2.0043	1.0031	up
GO:0001540	amyloid-beta binding	molecular_function	6	0.0275301	ENSRNOG00000049303	Marco	macrophage receptor with collagenous structure [Source:RGD Symbol;Acc:1589662]	0.632275	0.603204	0.631253	0	0	0	6222.44	12.6033	up
GO:0001525	angiogenesis	biological_process	5	0.0277916	ENSRNOG00000001414	Serpine1	serpin family E member 1 [Source:RGD Symbol;Acc:3249]	55.409	67.7847	164.683	17.9559	19.5535	21.1919	4.90409	2.29399	up
GO:0001525	angiogenesis	biological_process	5	0.0277916	ENSRNOG00000002771	Ereg	epiregulin [Source:RGD Symbol;Acc:620299]	3.53527	6.81166	10.5663	1.17724	1.04308	1.27508	5.98307	2.58089	up
GO:0001525	angiogenesis	biological_process	5	0.0277916	ENSRNOG00000010797	Esm1	endothelial cell-specific molecule 1 [Source:RGD Symbol;Acc:71013]	0.637304	0.835068	0.784875	3.70227	1.94073	1.20847	0.329454	-1.60185	down
GO:0001525	angiogenesis	biological_process	5	0.0277916	ENSRNOG00000014117	Hmox1	heme oxygenase 1 [Source:RGD Symbol;Acc:2806]	551.077	151.281	396.168	31.9406	70.2869	56.3487	6.92743	2.79232	up
GO:0001525	angiogenesis	biological_process	5	0.0277916	ENSRNOG00000015055	Scg2	secretogranin II [Source:RGD Symbol;Acc:3626]	0.035057	0.056805	0.033008	0.243826	0.147987	2.48424	0.0434172	-4.52559	down
GO:0001525	angiogenesis	biological_process	5	0.0277916	ENSRNOG00000019622	Ackr3	atypical chemokine receptor 3 [Source:RGD Symbol;Acc:620601]	76.304	96.1834	133.552	44.5313	43.6139	45.7138	2.28628	1.193	up
GO:0004867	serine-type endopeptidase inhibitor activity	molecular_function	8	0.027801	ENSRNOG00000001414	Serpine1	serpin family E member 1 [Source:RGD Symbol;Acc:3249]	55.409	67.7847	164.683	17.9559	19.5535	21.1919	4.90409	2.29399	up
GO:0004867	serine-type endopeptidase inhibitor activity	molecular_function	8	0.027801	ENSRNOG00000002640	Serpinb5	serpin family B member 5 [Source:RGD Symbol;Acc:69342]	0	0	0	0	0	0.922211	0.000325305	-11.5859	down
GO:0004867	serine-type endopeptidase inhibitor activity	molecular_function	8	0.027801	ENSRNOG00000010513	Tfpi2	tissue factor pathway inhibitor 2 [Source:RGD Symbol;Acc:628629]	2.00105	1.77887	4.74033	0.303871	0.748737	1.02747	4.09613	2.03426	up
GO:0004867	serine-type endopeptidase inhibitor activity	molecular_function	8	0.027801	ENSRNOG00000049614	AABR07028488		0.35126	0.524043	0.288915	0.939791	0.51385	7.48834	0.130197	-2.94123	down
GO:0006631	fatty acid metabolic process	biological_process	9	0.0287202	ENSRNOG00000008656	Snca	synuclein alpha [Source:RGD Symbol;Acc:3729]	0.033831	0	0.067124	0.192924	0.624332	0.823897	0.0615147	-4.02293	down
GO:0006631	fatty acid metabolic process	biological_process	9	0.0287202	ENSRNOG00000012458	Cyp2e1	cytochrome P450, family 2, subfamily e, polypeptide 1 [Source:RGD Symbol;Acc:2475]	1.59029	2.0422	0.503894	5.70974	4.74285	4.83838	0.270512	-1.88624	down
GO:0006631	fatty acid metabolic process	biological_process	9	0.0287202	ENSRNOG00000019183	Alox15	arachidonate 15-lipoxygenase [Source:RGD Symbol;Acc:70493]	3.17012	1.75927	2.65063	3.59856	4.73835	17.0034	0.299129	-1.74116	down
GO:0006631	fatty acid metabolic process	biological_process	9	0.0287202	ENSRNOG00000019500	Cyp1a1	cytochrome P450, family 1, subfamily a, polypeptide 1 [Source:RGD Symbol;Acc:2458]	3.79747	8.76837	3.6107	28.2685	25.6761	8.90865	0.25737	-1.95808	down
GO:0006631	fatty acid metabolic process	biological_process	9	0.0287202	ENSRNOG00000020254	Per2	period circadian regulator 2 [Source:RGD Symbol;Acc:61945]	5.08553	8.59563	7.97541	10.986	14.3571	23.4713	0.443651	-1.1725	down
GO:0071372	cellular response to follicle-stimulating hormone stimulus	biological_process	8	0.0288278	ENSRNOG00000004473	Ppargc1a	PPARG coactivator 1 alpha [Source:RGD Symbol;Acc:620925]	0.699099	0.733841	0.380414	1.53806	1.6784	1.50382	0.384163	-1.38021	down
GO:0071372	cellular response to follicle-stimulating hormone stimulus	biological_process	8	0.0288278	ENSRNOG00000014320	Inhba	inhibin subunit beta A [Source:RGD Symbol;Acc:62074]	1.43305	0.871656	0.743097	0.137745	0.416838	0.219709	3.93625	1.97682	up
GO:0030500	regulation of bone mineralization	biological_process	7	0.0288278	ENSRNOG00000039560	LOC103690116	osteomodulin [Source:RGD Symbol;Acc:9400356]	0.673123	0.945252	0.395326	1.92043	2.47155	2.86156	0.277616	-1.84884	down
GO:0030500	regulation of bone mineralization	biological_process	7	0.0288278	ENSRNOG00000046658	Omd	osteomodulin [Source:RGD Symbol;Acc:621818]	0.608261	0.820549	0.417281	1.82399	1.75037	2.8251	0.288476	-1.79348	down
GO:0008299	isoprenoid biosynthetic process	biological_process	8	0.0288278	ENSRNOG00000016690	Idi1	isopentenyl-diphosphate delta isomerase 1 [Source:RGD Symbol;Acc:621835]	18.2476	18.1584	25.9308	7.61291	11.1251	11.004	2.09592	1.06758	up
GO:0008299	isoprenoid biosynthetic process	biological_process	8	0.0288278	ENSRNOG00000019120	Hmgcs2	3-hydroxy-3-methylglutaryl-CoA synthase 2 [Source:RGD Symbol;Acc:2804]	5.71888	6.61347	2.53401	17.9587	10.1034	13.6071	0.356771	-1.48693	down
GO:0030506	ankyrin binding	molecular_function	6	0.0288278	ENSRNOG00000006911	Sptb	spectrin, beta, erythrocytic [Source:RGD Symbol;Acc:1303243]	0.235205	0.252763	0.222021	0.570131	0.443805	1.02519	0.348183	-1.52208	down
GO:0030506	ankyrin binding	molecular_function	6	0.0288278	ENSRNOG00000020951	Slc4a1	solute carrier family 4 member 1 (Diego blood group) [Source:RGD Symbol;Acc:3710]	0.638523	0.746664	0.545707	1.90142	2.54942	4.14042	0.224751	-2.1536	down
GO:0042531	positive regulation of tyrosine phosphorylation of STAT protein	biological_process	11	0.029181	ENSRNOG00000004470	Il24	interleukin 24 [Source:RGD Symbol;Acc:621484]	4.71744	2.76935	8.35128	0.401454	0.398275	1.3272	7.44644	2.89655	up
GO:0042531	positive regulation of tyrosine phosphorylation of STAT protein	biological_process	11	0.029181	ENSRNOG00000007002	Lif	LIF, interleukin 6 family cytokine [Source:RGD Symbol;Acc:620865]	2.79472	2.7336	5.46239	0.880568	1.01865	1.04408	3.73414	1.90078	up
GO:0042531	positive regulation of tyrosine phosphorylation of STAT protein	biological_process	11	0.029181	ENSRNOG00000018257	Hpx	hemopexin [Source:RGD Symbol;Acc:62040]	4.72321	3.68476	5.32204	2.45627	1.66849	2.5683	2.05138	1.03659	up
GO:0034686	integrin alphav-beta8 complex	cellular_component	6	0.0295264	ENSRNOG00000006569	Itgb8	integrin subunit beta 8 [Source:RGD Symbol;Acc:1311374]	2.69064	1.81036	3.42008	0.970632	0.984076	0.573387	3.13322	1.64765	up
GO:1901894	regulation of ATPase-coupled calcium transmembrane transporter activity	biological_process	9	0.0295264	ENSRNOG00000009047	Sln	sarcolipin [Source:RGD Symbol;Acc:1305224]	0.6646	0.889403	0.512004	3.73268	0.95632	42.3216	0.0439477	-4.50807	down
GO:0009258	10-formyltetrahydrofolate catabolic process	biological_process	10	0.0295264	ENSRNOG00000008586	Aldh1l2	aldehyde dehydrogenase 1 family, member L2 [Source:RGD Symbol;Acc:1309458]	1.58045	0.639397	1.11351	0.097725	0.378507	0.428929	3.68262	1.88073	up
GO:0048021	regulation of melanin biosynthetic process	biological_process	8	0.0295264	ENSRNOG00000010210	Slc7a11	solute carrier family 7 member 11 [Source:RGD Symbol;Acc:1309275]	0.785658	0.686638	0.778759	0.116861	0.130128	0.355379	3.73701	1.90188	up
GO:0060401	cytosolic calcium ion transport	biological_process	11	0.0295264	ENSRNOG00000017060	Ryr2	ryanodine receptor 2 [Source:RGD Symbol;Acc:620314]	0.186399	0.211602	0.108926	0.285075	0.300051	1.47817	0.245687	-2.0251	down
GO:0038195	urokinase plasminogen activator signaling pathway	biological_process	6	0.0295264	ENSRNOG00000005944	Slurp1	secreted Ly6/Plaur domain containing 1 [Source:RGD Symbol;Acc:1308768]	5.49258	1.6078	5.19726	0.125839	0.800363	0.417785	9.15011	3.19379	up
GO:0034485	phosphatidylinositol-3,4,5-trisphosphate 5-phosphatase activity	molecular_function	10	0.0295264	ENSRNOG00000019361	Inpp5j	inositol polyphosphate-5-phosphatase J [Source:RGD Symbol;Acc:620541]	0.503451	0.569211	0.51729	1.00663	1.27581	1.02692	0.48044	-1.05757	down
GO:0046452	dihydrofolate metabolic process	biological_process	7	0.0295264	ENSRNOG00000013521	Dhfr	dihydrofolate reductase [Source:RGD Symbol;Acc:2500]	4.22122	4.13326	5.03549	1.90962	1.4482	2.93528	2.12772	1.08931	up
GO:0031835	substance P receptor binding	molecular_function	9	0.0295264	ENSRNOG00000004404	Tac4	tachykinin 4 [Source:RGD Symbol;Acc:628842]	5.30119	5.34132	4.09235	2.20134	1.05591	2.37838	2.61459	1.38659	up
GO:0009082	branched-chain amino acid biosynthetic process	biological_process	10	0.0295264	ENSRNOG00000015514	Bcat1	branched chain amino acid transaminase 1 [Source:RGD Symbol;Acc:2195]	12.5295	6.97787	11.6416	3.05441	3.50371	6.92907	2.30952	1.2076	up
GO:0006116	NADH oxidation	biological_process	5	0.0295264	ENSRNOG00000056457	Gpd1	glycerol-3-phosphate dehydrogenase 1 [Source:RGD Symbol;Acc:621381]	11.7425	9.46065	12.8299	18.8796	16.7739	36.6629	0.470613	-1.08739	down
GO:0005171	hepatocyte growth factor receptor binding	molecular_function	7	0.0295264	ENSRNOG00000010797	Esm1	endothelial cell-specific molecule 1 [Source:RGD Symbol;Acc:71013]	0.637304	0.835068	0.784875	3.70227	1.94073	1.20847	0.329454	-1.60185	down
GO:1900135	positive regulation of renin secretion into blood stream	biological_process	11	0.0295264	ENSRNOG00000018606	Olr59	olfactory receptor 59 [Source:RGD Symbol;Acc:628858]	1.22605	1.00656	1.51125	0.528759	0.534917	0.739663	2.07607	1.05386	up
GO:0044299	C-fiber	cellular_component	7	0.0295264	ENSRNOG00000007159	Ccl2	C-C motif chemokine ligand 2 [Source:RGD Symbol;Acc:3645]	37.7066	18.9936	41.8423	1.13671	3.71253	3.7896	11.4069	3.51183	up
GO:0014891	striated muscle atrophy	biological_process	8	0.0295264	ENSRNOG00000018991	Gsn	gelsolin [Source:RGD Symbol;Acc:1303089]	421.812	450.543	281.254	941.528	460.793	1133.21	0.454977	-1.13614	down
GO:0033257	Bcl3/NF-kappaB2 complex	cellular_component	5	0.0295264	ENSRNOG00000043416	Bcl3	BCL3, transcription coactivator [Source:RGD Symbol;Acc:1589465]	16.3829	10.3304	23.1764	5.68874	5.93954	6.44326	2.76067	1.46502	up
GO:0016679	oxidoreductase activity, acting on diphenols and related substances as donors	molecular_function	5	0.0295264	ENSRNOG00000019500	Cyp1a1	cytochrome P450, family 1, subfamily a, polypeptide 1 [Source:RGD Symbol;Acc:2458]	3.79747	8.76837	3.6107	28.2685	25.6761	8.90865	0.25737	-1.95808	down
GO:0101021	estrogen 2-hydroxylase activity	molecular_function	7	0.0295264	ENSRNOG00000019500	Cyp1a1	cytochrome P450, family 1, subfamily a, polypeptide 1 [Source:RGD Symbol;Acc:2458]	3.79747	8.76837	3.6107	28.2685	25.6761	8.90865	0.25737	-1.95808	down
GO:1905049	negative regulation of metallopeptidase activity	biological_process	11	0.0295264	ENSRNOG00000010208	Timp1	TIMP metallopeptidase inhibitor 1 [Source:RGD Symbol;Acc:621675]	191.725	124.836	377.443	58.9436	79.8218	69.1842	3.33737	1.73871	up
GO:0098966	perisynaptic extracellular matrix	cellular_component	5	0.0295264	ENSRNOG00000058645	Tnc	tenascin C [Source:RGD Symbol;Acc:621057]	32.8819	24.6221	38.6851	10.8562	17.6057	12.6766	2.33817	1.22538	up
GO:0019249	lactate biosynthetic process	biological_process	10	0.0295264	ENSRNOG00000020254	Per2	period circadian regulator 2 [Source:RGD Symbol;Acc:61945]	5.08553	8.59563	7.97541	10.986	14.3571	23.4713	0.443651	-1.1725	down
GO:0004392	heme oxygenase (decyclizing) activity	molecular_function	6	0.0295264	ENSRNOG00000014117	Hmox1	heme oxygenase 1 [Source:RGD Symbol;Acc:2806]	551.077	151.281	396.168	31.9406	70.2869	56.3487	6.92743	2.79232	up
GO:0035963	cellular response to interleukin-13	biological_process	8	0.0295264	ENSRNOG00000019183	Alox15	arachidonate 15-lipoxygenase [Source:RGD Symbol;Acc:70493]	3.17012	1.75927	2.65063	3.59856	4.73835	17.0034	0.299129	-1.74116	down
GO:0015988	energy coupled proton transmembrane transport, against electrochemical gradient	biological_process	10	0.0295264	ENSRNOG00000007290	Atp1a2	ATPase Na+/K+ transporting subunit alpha 2 [Source:RGD Symbol;Acc:2168]	1.11361	2.2107	0.439613	6.02731	3.2216	13.5037	0.165429	-2.59572	down
GO:0070164	negative regulation of adiponectin secretion	biological_process	9	0.0295264	ENSRNOG00000004649	Il1b	interleukin 1 beta [Source:RGD Symbol;Acc:2891]	17.0922	15.7097	15.266	6.22867	5.3594	4.98742	2.89994	1.53602	up
GO:0071799	cellular response to prostaglandin D stimulus	biological_process	8	0.0295264	ENSRNOG00000058645	Tnc	tenascin C [Source:RGD Symbol;Acc:621057]	32.8819	24.6221	38.6851	10.8562	17.6057	12.6766	2.33817	1.22538	up
GO:0006587	serotonin biosynthetic process from tryptophan	biological_process	11	0.0295264	ENSRNOG00000032261	Cyp2d4	cytochrome P450, family 2, subfamily d, polypeptide 4 [Source:RGD Symbol;Acc:620640]	3.90219	4.53709	2.88962	9.25606	7.48095	6.29301	0.491919	-1.02351	down
GO:0051799	negative regulation of hair follicle development	biological_process	8	0.0295264	ENSRNOG00000014320	Inhba	inhibin subunit beta A [Source:RGD Symbol;Acc:62074]	1.43305	0.871656	0.743097	0.137745	0.416838	0.219709	3.93625	1.97682	up
GO:2000552	negative regulation of T-helper 2 cell cytokine production	biological_process	12	0.0295264	ENSRNOG00000013304	Arg1	arginase 1 [Source:RGD Symbol;Acc:2150]	38.2968	26.0177	49.9768	8.35733	12.4054	14.4375	3.24689	1.69906	up
GO:0004781	sulfate adenylyltransferase (ATP) activity	molecular_function	9	0.0295264	ENSRNOG00000011068	Papss2	3'-phosphoadenosine 5'-phosphosulfate synthase 2 [Source:RGD Symbol;Acc:1307012]	1.26168	1.73621	0.852359	2.5901	1.95362	4.37942	0.43149	-1.2126	down
GO:0016155	formyltetrahydrofolate dehydrogenase activity	molecular_function	7	0.0295264	ENSRNOG00000008586	Aldh1l2	aldehyde dehydrogenase 1 family, member L2 [Source:RGD Symbol;Acc:1309458]	1.58045	0.639397	1.11351	0.097725	0.378507	0.428929	3.68262	1.88073	up
GO:0051612	negative regulation of serotonin uptake	biological_process	9	0.0295264	ENSRNOG00000008656	Snca	synuclein alpha [Source:RGD Symbol;Acc:3729]	0.033831	0	0.067124	0.192924	0.624332	0.823897	0.0615147	-4.02293	down
GO:0050428	3'-phosphoadenosine 5'-phosphosulfate biosynthetic process	biological_process	12	0.0295264	ENSRNOG00000011068	Papss2	3'-phosphoadenosine 5'-phosphosulfate synthase 2 [Source:RGD Symbol;Acc:1307012]	1.26168	1.73621	0.852359	2.5901	1.95362	4.37942	0.43149	-1.2126	down
GO:0052654	L-leucine transaminase activity	molecular_function	8	0.0295264	ENSRNOG00000015514	Bcat1	branched chain amino acid transaminase 1 [Source:RGD Symbol;Acc:2195]	12.5295	6.97787	11.6416	3.05441	3.50371	6.92907	2.30952	1.2076	up
GO:0008294	calcium- and calmodulin-responsive adenylate cyclase activity	molecular_function	6	0.0295264	ENSRNOG00000059479	Adcy1	adenylate cyclase 1 [Source:RGD Symbol;Acc:1309318]	0.206208	0.356452	0.124273	1.21653	0.813194	0.51294	0.270163	-1.8881	down
GO:1904571	positive regulation of selenocysteine incorporation	biological_process	12	0.0295264	ENSRNOG00000032825	LOC100362027	ribosomal protein L30 [Source:RGD Symbol;Acc:621201]	217.255	347.218	207.369	29.6581	57.4997	72.8836	4.82277	2.26986	up
GO:0042322	negative regulation of circadian sleep/wake cycle, REM sleep	biological_process	9	0.0295264	ENSRNOG00000018827	LOC103694905	5-hydroxytryptamine receptor 7 [Source:RGD Symbol;Acc:9265298]	0.601136	0.302224	0.67299	0.0940072	0.184716	0.168906	3.52156	1.81621	up
GO:0045959	negative regulation of complement activation, classical pathway	biological_process	13	0.0295264	ENSRNOG00000004062	C4bpa	complement component 4 binding protein, alpha [Source:RGD Symbol;Acc:2235]	58.5906	39.8521	68.5658	21.3697	31.3852	29.0953	2.04042	1.02886	up
GO:0032764	negative regulation of mast cell cytokine production	biological_process	9	0.0295264	ENSRNOG00000014117	Hmox1	heme oxygenase 1 [Source:RGD Symbol;Acc:2806]	551.077	151.281	396.168	31.9406	70.2869	56.3487	6.92743	2.79232	up
GO:0030029	actin filament-based process	biological_process	4	0.0295264	ENSRNOG00000002723	Sele	selectin E [Source:RGD Symbol;Acc:3654]	2.98187	1.19921	3.6168	0.148222	0.414433	0.461137	7.61667	2.92916	up
GO:0035922	foramen ovale closure	biological_process	5	0.0295264	ENSRNOG00000016181	Tbx20	T-box 20 [Source:RGD Symbol;Acc:1309396]	0	0	0	0	0	0.778032	0.000385588	-11.3407	down
GO:0035284	brain segmentation	biological_process	7	0.0295264	ENSRNOG00000000640	Egr2	early growth response 2 [Source:RGD Symbol;Acc:621608]	3.15739	6.1992	6.47142	1.3654	1.96587	0.959568	3.68879	1.88315	up
GO:0097154	GABAergic neuron differentiation	biological_process	7	0.0295264	ENSRNOG00000014320	Inhba	inhibin subunit beta A [Source:RGD Symbol;Acc:62074]	1.43305	0.871656	0.743097	0.137745	0.416838	0.219709	3.93625	1.97682	up
GO:0031894	V1A vasopressin receptor binding	molecular_function	8	0.0295264	ENSRNOG00000004400	Avpr1a	arginine vasopressin receptor 1A [Source:RGD Symbol;Acc:2185]	0.884247	0.991065	0.583946	1.63749	2.34024	1.80556	0.425235	-1.23367	down
GO:0044381	glucose import in response to insulin stimulus	biological_process	13	0.0295264	ENSRNOG00000022239	Trarg1	trafficking regulator of GLUT4 (SLC2A4) 1 [Source:RGD Symbol;Acc:1307639]	4.0732	4.20618	3.13567	7.29171	5.20973	13.9028	0.432319	-1.20983	down
GO:0052655	L-valine transaminase activity	molecular_function	8	0.0295264	ENSRNOG00000015514	Bcat1	branched chain amino acid transaminase 1 [Source:RGD Symbol;Acc:2195]	12.5295	6.97787	11.6416	3.05441	3.50371	6.92907	2.30952	1.2076	up
GO:0072592	oxygen metabolic process	biological_process	6	0.0295264	ENSRNOG00000003510	Fmo2	flavin containing dimethylaniline monoxygenase 2 [Source:RGD Symbol;Acc:628600]	36.2628	40.8993	13.9322	160.378	105.178	155.493	0.216351	-2.20855	down
GO:0003870	5-aminolevulinate synthase activity	molecular_function	9	0.0295264	ENSRNOG00000000167	Alas2	5'-aminolevulinate synthase 2 [Source:RGD Symbol;Acc:2084]	6.09555	7.97318	4.91833	9.86952	17.5757	19.2731	0.406416	-1.29897	down
GO:0006638	neutral lipid metabolic process	biological_process	7	0.0295264	ENSRNOG00000008656	Snca	synuclein alpha [Source:RGD Symbol;Acc:3729]	0.033831	0	0.067124	0.192924	0.624332	0.823897	0.0615147	-4.02293	down
GO:0010751	negative regulation of nitric oxide mediated signal transduction	biological_process	10	0.0295264	ENSRNOG00000045829	Thbs1	thrombospondin 1 [Source:RGD Symbol;Acc:1588455]	69.4641	106.372	164.303	44.915	55.3273	28.7153	2.6376	1.39923	up
GO:0043512	inhibin A complex	cellular_component	5	0.0295264	ENSRNOG00000014320	Inhba	inhibin subunit beta A [Source:RGD Symbol;Acc:62074]	1.43305	0.871656	0.743097	0.137745	0.416838	0.219709	3.93625	1.97682	up
GO:0004368	glycerol-3-phosphate dehydrogenase (quinone) activity	molecular_function	7	0.0295264	ENSRNOG00000056457	Gpd1	glycerol-3-phosphate dehydrogenase 1 [Source:RGD Symbol;Acc:621381]	11.7425	9.46065	12.8299	18.8796	16.7739	36.6629	0.470613	-1.08739	down
GO:2001044	regulation of integrin-mediated signaling pathway	biological_process	8	0.0295264	ENSRNOG00000010208	Timp1	TIMP metallopeptidase inhibitor 1 [Source:RGD Symbol;Acc:621675]	191.725	124.836	377.443	58.9436	79.8218	69.1842	3.33737	1.73871	up
GO:0070699	type II activin receptor binding	molecular_function	9	0.0295264	ENSRNOG00000014320	Inhba	inhibin subunit beta A [Source:RGD Symbol;Acc:62074]	1.43305	0.871656	0.743097	0.137745	0.416838	0.219709	3.93625	1.97682	up
GO:0003193	pulmonary valve formation	biological_process	6	0.0295264	ENSRNOG00000016181	Tbx20	T-box 20 [Source:RGD Symbol;Acc:1309396]	0	0	0	0	0	0.778032	0.000385588	-11.3407	down
GO:1904715	negative regulation of chaperone-mediated autophagy	biological_process	10	0.0295264	ENSRNOG00000008656	Snca	synuclein alpha [Source:RGD Symbol;Acc:3729]	0.033831	0	0.067124	0.192924	0.624332	0.823897	0.0615147	-4.02293	down
GO:0005900	oncostatin-M receptor complex	cellular_component	6	0.0295264	ENSRNOG00000033192	Osmr	oncostatin M receptor [Source:RGD Symbol;Acc:1302983]	11.718	9.37308	19.7537	4.6298	7.5865	6.30735	2.20501	1.14079	up
GO:0098907	regulation of SA node cell action potential	biological_process	7	0.0295264	ENSRNOG00000017060	Ryr2	ryanodine receptor 2 [Source:RGD Symbol;Acc:620314]	0.186399	0.211602	0.108926	0.285075	0.300051	1.47817	0.245687	-2.0251	down
GO:1903285	positive regulation of hydrogen peroxide catabolic process	biological_process	10	0.0295264	ENSRNOG00000008656	Snca	synuclein alpha [Source:RGD Symbol;Acc:3729]	0.033831	0	0.067124	0.192924	0.624332	0.823897	0.0615147	-4.02293	down
GO:0009081	branched-chain amino acid metabolic process	biological_process	9	0.0295264	ENSRNOG00000015514	Bcat1	branched chain amino acid transaminase 1 [Source:RGD Symbol;Acc:2195]	12.5295	6.97787	11.6416	3.05441	3.50371	6.92907	2.30952	1.2076	up
GO:0042700	luteinizing hormone signaling pathway	biological_process	6	0.0295264	ENSRNOG00000002771	Ereg	epiregulin [Source:RGD Symbol;Acc:620299]	3.53527	6.81166	10.5663	1.17724	1.04308	1.27508	5.98307	2.58089	up
GO:0003207	cardiac chamber formation	biological_process	5	0.0295264	ENSRNOG00000016181	Tbx20	T-box 20 [Source:RGD Symbol;Acc:1309396]	0	0	0	0	0	0.778032	0.000385588	-11.3407	down
GO:0051284	positive regulation of sequestering of calcium ion	biological_process	7	0.0295264	ENSRNOG00000017060	Ryr2	ryanodine receptor 2 [Source:RGD Symbol;Acc:620314]	0.186399	0.211602	0.108926	0.285075	0.300051	1.47817	0.245687	-2.0251	down
GO:0045988	negative regulation of striated muscle contraction	biological_process	10	0.0295264	ENSRNOG00000007290	Atp1a2	ATPase Na+/K+ transporting subunit alpha 2 [Source:RGD Symbol;Acc:2168]	1.11361	2.2107	0.439613	6.02731	3.2216	13.5037	0.165429	-2.59572	down
GO:0048160	primary follicle stage	biological_process	6	0.0295264	ENSRNOG00000002771	Ereg	epiregulin [Source:RGD Symbol;Acc:620299]	3.53527	6.81166	10.5663	1.17724	1.04308	1.27508	5.98307	2.58089	up
GO:0006788	heme oxidation	biological_process	9	0.0295264	ENSRNOG00000014117	Hmox1	heme oxygenase 1 [Source:RGD Symbol;Acc:2806]	551.077	151.281	396.168	31.9406	70.2869	56.3487	6.92743	2.79232	up
GO:0016813	hydrolase activity, acting on carbon-nitrogen (but not peptide) bonds, in linear amidines	molecular_function	6	0.0295264	ENSRNOG00000013304	Arg1	arginase 1 [Source:RGD Symbol;Acc:2150]	38.2968	26.0177	49.9768	8.35733	12.4054	14.4375	3.24689	1.69906	up
GO:0051552	flavone metabolic process	biological_process	6	0.0295264	ENSRNOG00000004473	Ppargc1a	PPARG coactivator 1 alpha [Source:RGD Symbol;Acc:620925]	0.699099	0.733841	0.380414	1.53806	1.6784	1.50382	0.384163	-1.38021	down
GO:0004421	hydroxymethylglutaryl-CoA synthase activity	molecular_function	7	0.0295264	ENSRNOG00000019120	Hmgcs2	3-hydroxy-3-methylglutaryl-CoA synthase 2 [Source:RGD Symbol;Acc:2804]	5.71888	6.61347	2.53401	17.9587	10.1034	13.6071	0.356771	-1.48693	down
GO:1901558	response to metformin	biological_process	6	0.0295264	ENSRNOG00000004473	Ppargc1a	PPARG coactivator 1 alpha [Source:RGD Symbol;Acc:620925]	0.699099	0.733841	0.380414	1.53806	1.6784	1.50382	0.384163	-1.38021	down
GO:1905684	regulation of plasma membrane repair	biological_process	9	0.0295264	ENSRNOG00000019433	Rab3a	RAB3A, member RAS oncogene family [Source:RGD Symbol;Acc:3528]	5.25359	6.66674	3.95532	13.6283	11.8968	8.19245	0.470843	-1.08668	down
GO:0050473	arachidonate 15-lipoxygenase activity	molecular_function	7	0.0295264	ENSRNOG00000019183	Alox15	arachidonate 15-lipoxygenase [Source:RGD Symbol;Acc:70493]	3.17012	1.75927	2.65063	3.59856	4.73835	17.0034	0.299129	-1.74116	down
GO:0033552	response to vitamin B3	biological_process	9	0.0295264	ENSRNOG00000007159	Ccl2	C-C motif chemokine ligand 2 [Source:RGD Symbol;Acc:3645]	37.7066	18.9936	41.8423	1.13671	3.71253	3.7896	11.4069	3.51183	up
GO:2000182	regulation of progesterone biosynthetic process	biological_process	9	0.0295264	ENSRNOG00000019422	Egr1	early growth response 1 [Source:RGD Symbol;Acc:2544]	28.8778	81.6766	49.115	5.6807	12.1778	9.44428	5.8481	2.54797	up
GO:0017143	insecticide metabolic process	biological_process	6	0.0295264	ENSRNOG00000019500	Cyp1a1	cytochrome P450, family 1, subfamily a, polypeptide 1 [Source:RGD Symbol;Acc:2458]	3.79747	8.76837	3.6107	28.2685	25.6761	8.90865	0.25737	-1.95808	down
GO:1990622	CHOP-ATF3 complex	cellular_component	4	0.0295264	ENSRNOG00000003745	Atf3	activating transcription factor 3 [Source:RGD Symbol;Acc:2165]	10.4013	37.4337	46.2986	3.78197	4.08518	7.17428	6.25829	2.64577	up
GO:0002605	negative regulation of dendritic cell antigen processing and presentation	biological_process	8	0.0295264	ENSRNOG00000045829	Thbs1	thrombospondin 1 [Source:RGD Symbol;Acc:1588455]	69.4641	106.372	164.303	44.915	55.3273	28.7153	2.6376	1.39923	up
[truncated: 3,331 more rows]
