# Supplementary material for: Analysis of the Potential Relationship between Aging and Pulmonary Fibrosis Based on Transcriptome
Source: Life (Basel). 2022 Nov 23;12(12):1961. doi: 10.3390/life12121961 (PMC9788318; doi:10.3390/life12121961)
Supplement: Supplementary file 1 [file life-12-01961-s001.zip › Table S13-o-PF vs y-PF KEGG enrichment Gene of Figure S1D.xlsx]

## Sheet: Sheet1
pathway_id	pathway_name	pvalue	Gene_ID	Gene_name	KO_ENTRY	EC	Description	FPKM.O_PF1	FPKM.O_PF2	FPKM.O_PF3	FPKM.Y_PF1	FPKM.Y_PF2	FPKM.Y_PF3	fc	log2(fc)	regulation
ko05144	Malaria	3.70391e-08	ENSRNOG00000002723	Sele	K06494	NA	selectin E [Source:RGD Symbol;Acc:3654]	2.98187	1.19921	3.6168	0.148222	0.414433	0.461137	7.61667	2.92916	up
ko05144	Malaria	3.70391e-08	ENSRNOG00000002794	Selp	K06496	NA	selectin P [Source:RGD Symbol;Acc:3656]	3.596	2.43421	6.01392	0.725463	1.69202	1.63187	2.97434	1.57257	up
ko05144	Malaria	3.70391e-08	ENSRNOG00000004649	Il1b	K04519	NA	interleukin 1 beta [Source:RGD Symbol;Acc:2891]	17.0922	15.7097	15.266	6.22867	5.3594	4.98742	2.89994	1.53602	up
ko05144	Malaria	3.70391e-08	ENSRNOG00000007159	Ccl2	K14624	NA	C-C motif chemokine ligand 2 [Source:RGD Symbol;Acc:3645]	37.7066	18.9936	41.8423	1.13671	3.71253	3.7896	11.4069	3.51183	up
ko05144	Malaria	3.70391e-08	ENSRNOG00000010278	Il6	K05405	NA	interleukin 6 [Source:RGD Symbol;Acc:2901]	3.16485	2.11915	11.0231	0.105601	0.098662	0.045109	65.3927	6.03106	up
ko05144	Malaria	3.70391e-08	ENSRNOG00000010529	Thbs2	K04659	NA	thrombospondin 2 [Source:RGD Symbol;Acc:1310979]	16.9175	9.7328	15.9974	2.57939	6.01878	6.82916	2.76443	1.46698	up
ko05144	Malaria	3.70391e-08	ENSRNOG00000029768	Ccl12	K14624	NA	chemokine (C-C motif) ligand 12 [Source:RGD Symbol;Acc:1309255]	6.0007	2.47451	2.57848	0.194217	0.89901	0.367082	7.56941	2.92018	up
ko05144	Malaria	3.70391e-08	ENSRNOG00000045829	Thbs1	K16857	NA	thrombospondin 1 [Source:RGD Symbol;Acc:1588455]	69.4641	106.372	164.303	44.915	55.3273	28.7153	2.6376	1.39923	up
ko05144	Malaria	3.70391e-08	ENSRNOG00000045989	Hba-a3	K13822	NA	hemoglobin alpha, adult chain 3 [Source:RGD Symbol;Acc:1359209]	29.1036	33.0564	24.4265	54.478	69.3314	104.209	0.379734	-1.39694	down
ko05144	Malaria	3.70391e-08	ENSRNOG00000047321	Hba-a2	K13822	NA	hemoglobin alpha, adult chain 2 [Source:RGD Symbol;Acc:1359364]	622.608	817.629	600.355	1003.7	1375.98	1844.64	0.483058	-1.04973	down
ko04657	IL-17 signaling pathway	2.85542e-07	ENSRNOG00000000239	Ccl7	K05509	NA	C-C motif chemokine ligand 7 [Source:RGD Symbol;Acc:1359152]	14.4232	11.1589	18.1968	0.371988	1.4184	3.33763	8.53719	3.09376	up
ko04657	IL-17 signaling pathway	2.85542e-07	ENSRNOG00000002792	Cxcl2	K05505	NA	C-X-C motif chemokine ligand 2 [Source:RGD Symbol;Acc:70069]	2.67869	3.89774	3.91406	0.2245	0.858824	0.310974	7.52384	2.91147	up
ko04657	IL-17 signaling pathway	2.85542e-07	ENSRNOG00000002802	Cxcl1	K05505	NA	C-X-C motif chemokine ligand 1 [Source:RGD Symbol;Acc:619869]	37.7589	31.9443	77.5216	7.05145	18.0701	6.03944	4.72466	2.24021	up
ko04657	IL-17 signaling pathway	2.85542e-07	ENSRNOG00000002843	Cxcl6	K05506	NA	C-X-C motif chemokine ligand 6 [Source:RGD Symbol;Acc:708540]	5.43574	1.71607	3.19644	0.056385	0.662585	1.21597	5.34811	2.41903	up
ko04657	IL-17 signaling pathway	2.85542e-07	ENSRNOG00000004649	Il1b	K04519	NA	interleukin 1 beta [Source:RGD Symbol;Acc:2891]	17.0922	15.7097	15.266	6.22867	5.3594	4.98742	2.89994	1.53602	up
ko04657	IL-17 signaling pathway	2.85542e-07	ENSRNOG00000007159	Ccl2	K14624	NA	C-C motif chemokine ligand 2 [Source:RGD Symbol;Acc:3645]	37.7066	18.9936	41.8423	1.13671	3.71253	3.7896	11.4069	3.51183	up
ko04657	IL-17 signaling pathway	2.85542e-07	ENSRNOG00000010278	Il6	K05405	NA	interleukin 6 [Source:RGD Symbol;Acc:2901]	3.16485	2.11915	11.0231	0.105601	0.098662	0.045109	65.3927	6.03106	up
ko04657	IL-17 signaling pathway	2.85542e-07	ENSRNOG00000011483	S100a9	K21128	NA	S100 calcium binding protein A9 [Source:RGD Symbol;Acc:620267]	111.507	62.986	76.8319	20.221	25.7548	22.6237	3.66366	1.87329	up
ko04657	IL-17 signaling pathway	2.85542e-07	ENSRNOG00000011557	S100a8	K21127	NA	S100 calcium binding protein A8 [Source:RGD Symbol;Acc:620265]	58.764	26.4357	40.8193	6.86219	14.8878	7.83776	4.25916	2.09057	up
ko04657	IL-17 signaling pathway	2.85542e-07	ENSRNOG00000013973	Lcn2	K21129	NA	lipocalin 2 [Source:RGD Symbol;Acc:69408]	1594.83	895.005	2315.86	399.193	738.611	424.407	3.07622	1.62116	up
ko04657	IL-17 signaling pathway	2.85542e-07	ENSRNOG00000029768	Ccl12	K14624	NA	chemokine (C-C motif) ligand 12 [Source:RGD Symbol;Acc:1309255]	6.0007	2.47451	2.57848	0.194217	0.89901	0.367082	7.56941	2.92018	up
ko04657	IL-17 signaling pathway	2.85542e-07	ENSRNOG00000046667	Fosb	K09029	NA	FosB proto-oncogene, AP-1 transcription factor subunit [Source:RGD Symbol;Acc:1308198]	4.40301	29.0803	28.1312	2.28038	1.38324	1.99461	10.8894	3.44485	up
ko04060	Cytokine-cytokine receptor interaction	3.78026e-06	ENSRNOG00000000239	Ccl7	K05509	NA	C-C motif chemokine ligand 7 [Source:RGD Symbol;Acc:1359152]	14.4232	11.1589	18.1968	0.371988	1.4184	3.33763	8.53719	3.09376	up
ko04060	Cytokine-cytokine receptor interaction	3.78026e-06	ENSRNOG00000002792	Cxcl2	K05505	NA	C-X-C motif chemokine ligand 2 [Source:RGD Symbol;Acc:70069]	2.67869	3.89774	3.91406	0.2245	0.858824	0.310974	7.52384	2.91147	up
ko04060	Cytokine-cytokine receptor interaction	3.78026e-06	ENSRNOG00000002802	Cxcl1	K05505	NA	C-X-C motif chemokine ligand 1 [Source:RGD Symbol;Acc:619869]	37.7589	31.9443	77.5216	7.05145	18.0701	6.03944	4.72466	2.24021	up
ko04060	Cytokine-cytokine receptor interaction	3.78026e-06	ENSRNOG00000002843	Cxcl6	K05506	NA	C-X-C motif chemokine ligand 6 [Source:RGD Symbol;Acc:708540]	5.43574	1.71607	3.19644	0.056385	0.662585	1.21597	5.34811	2.41903	up
ko04060	Cytokine-cytokine receptor interaction	3.78026e-06	ENSRNOG00000003546	Tnfrsf12a	K05149	NA	TNF receptor superfamily member 12A [Source:RGD Symbol;Acc:631329]	41.3385	35.8452	71.9517	13.9554	16.6142	17.2047	3.12167	1.64232	up
ko04060	Cytokine-cytokine receptor interaction	3.78026e-06	ENSRNOG00000004470	Il24	K22668	NA	interleukin 24 [Source:RGD Symbol;Acc:621484]	4.71744	2.76935	8.35128	0.401454	0.398275	1.3272	7.44644	2.89655	up
ko04060	Cytokine-cytokine receptor interaction	3.78026e-06	ENSRNOG00000004649	Il1b	K04519	NA	interleukin 1 beta [Source:RGD Symbol;Acc:2891]	17.0922	15.7097	15.266	6.22867	5.3594	4.98742	2.89994	1.53602	up
ko04060	Cytokine-cytokine receptor interaction	3.78026e-06	ENSRNOG00000005871	Il1rn	K05481	NA	interleukin 1 receptor antagonist [Source:RGD Symbol;Acc:621159]	38.7998	25.085	37.5114	15.4297	14.5177	9.55624	2.56675	1.35995	up
ko04060	Cytokine-cytokine receptor interaction	3.78026e-06	ENSRNOG00000007002	Lif	K05419	NA	LIF, interleukin 6 family cytokine [Source:RGD Symbol;Acc:620865]	2.79472	2.7336	5.46239	0.880568	1.01865	1.04408	3.73414	1.90078	up
ko04060	Cytokine-cytokine receptor interaction	3.78026e-06	ENSRNOG00000007159	Ccl2	K14624	NA	C-C motif chemokine ligand 2 [Source:RGD Symbol;Acc:3645]	37.7066	18.9936	41.8423	1.13671	3.71253	3.7896	11.4069	3.51183	up
ko04060	Cytokine-cytokine receptor interaction	3.78026e-06	ENSRNOG00000010278	Il6	K05405	NA	interleukin 6 [Source:RGD Symbol;Acc:2901]	3.16485	2.11915	11.0231	0.105601	0.098662	0.045109	65.3927	6.03106	up
ko04060	Cytokine-cytokine receptor interaction	3.78026e-06	ENSRNOG00000011406	Ccl4	K12964	NA	C-C motif chemokine ligand 4 [Source:RGD Symbol;Acc:620441]	11.707	5.81372	6.12502	3.35851	3.36341	2.87314	2.46437	1.30122	up
ko04060	Cytokine-cytokine receptor interaction	3.78026e-06	ENSRNOG00000011984	Cxcl14	K10033	NA	C-X-C motif chemokine ligand 14 [Source:RGD Symbol;Acc:1307406]	15.4854	17.2001	9.52316	46.4304	41.5978	22.8916	0.380533	-1.39391	down
ko04060	Cytokine-cytokine receptor interaction	3.78026e-06	ENSRNOG00000014320	Inhba	NA	NA	inhibin subunit beta A [Source:RGD Symbol;Acc:62074]	1.43305	0.871656	0.743097	0.137745	0.416838	0.219709	3.93625	1.97682	up
ko04060	Cytokine-cytokine receptor interaction	3.78026e-06	ENSRNOG00000019622	Ackr3	K04304	NA	atypical chemokine receptor 3 [Source:RGD Symbol;Acc:620601]	76.304	96.1834	133.552	44.5313	43.6139	45.7138	2.28628	1.193	up
ko04060	Cytokine-cytokine receptor interaction	3.78026e-06	ENSRNOG00000024390	Osm	K05418	NA	oncostatin M [Source:RGD Symbol;Acc:1585012]	2.84715	2.66279	2.36715	1.03466	0.790956	0.679723	3.14413	1.65266	up
ko04060	Cytokine-cytokine receptor interaction	3.78026e-06	ENSRNOG00000029768	Ccl12	K14624	NA	chemokine (C-C motif) ligand 12 [Source:RGD Symbol;Acc:1309255]	6.0007	2.47451	2.57848	0.194217	0.89901	0.367082	7.56941	2.92018	up
ko04060	Cytokine-cytokine receptor interaction	3.78026e-06	ENSRNOG00000033192	Osmr	K05057	NA	oncostatin M receptor [Source:RGD Symbol;Acc:1302983]	11.718	9.37308	19.7537	4.6298	7.5865	6.30735	2.20501	1.14079	up
ko04668	TNF signaling pathway	1.07371e-05	ENSRNOG00000002723	Sele	K06494	NA	selectin E [Source:RGD Symbol;Acc:3654]	2.98187	1.19921	3.6168	0.148222	0.414433	0.461137	7.61667	2.92916	up
ko04668	TNF signaling pathway	1.07371e-05	ENSRNOG00000002792	Cxcl2	K05505	NA	C-X-C motif chemokine ligand 2 [Source:RGD Symbol;Acc:70069]	2.67869	3.89774	3.91406	0.2245	0.858824	0.310974	7.52384	2.91147	up
ko04668	TNF signaling pathway	1.07371e-05	ENSRNOG00000002802	Cxcl1	K05505	NA	C-X-C motif chemokine ligand 1 [Source:RGD Symbol;Acc:619869]	37.7589	31.9443	77.5216	7.05145	18.0701	6.03944	4.72466	2.24021	up
ko04668	TNF signaling pathway	1.07371e-05	ENSRNOG00000002946	Socs3	K04696	NA	suppressor of cytokine signaling 3 [Source:RGD Symbol;Acc:621087]	50.4008	65.1614	87.6908	40.5991	23.2455	16.4051	2.53276	1.34071	up
ko04668	TNF signaling pathway	1.07371e-05	ENSRNOG00000004649	Il1b	K04519	NA	interleukin 1 beta [Source:RGD Symbol;Acc:2891]	17.0922	15.7097	15.266	6.22867	5.3594	4.98742	2.89994	1.53602	up
ko04668	TNF signaling pathway	1.07371e-05	ENSRNOG00000007002	Lif	K05419	NA	LIF, interleukin 6 family cytokine [Source:RGD Symbol;Acc:620865]	2.79472	2.7336	5.46239	0.880568	1.01865	1.04408	3.73414	1.90078	up
ko04668	TNF signaling pathway	1.07371e-05	ENSRNOG00000007159	Ccl2	K14624	NA	C-C motif chemokine ligand 2 [Source:RGD Symbol;Acc:3645]	37.7066	18.9936	41.8423	1.13671	3.71253	3.7896	11.4069	3.51183	up
ko04668	TNF signaling pathway	1.07371e-05	ENSRNOG00000010278	Il6	K05405	NA	interleukin 6 [Source:RGD Symbol;Acc:2901]	3.16485	2.11915	11.0231	0.105601	0.098662	0.045109	65.3927	6.03106	up
ko04668	TNF signaling pathway	1.07371e-05	ENSRNOG00000029768	Ccl12	K14624	NA	chemokine (C-C motif) ligand 12 [Source:RGD Symbol;Acc:1309255]	6.0007	2.47451	2.57848	0.194217	0.89901	0.367082	7.56941	2.92018	up
ko04668	TNF signaling pathway	1.07371e-05	ENSRNOG00000042838	Junb	K09028	NA	JunB proto-oncogene, AP-1 transcription factor subunit [Source:RGD Symbol;Acc:2944]	78.6986	148.666	117.666	59.4441	49.5459	34.9588	2.39689	1.26117	up
ko04668	TNF signaling pathway	1.07371e-05	ENSRNOG00000043416	Bcl3	K09258	NA	BCL3, transcription coactivator [Source:RGD Symbol;Acc:1589465]	16.3829	10.3304	23.1764	5.68874	5.93954	6.44326	2.76067	1.46502	up
ko00982	Drug metabolism - cytochrome P450	6.82036e-05	ENSRNOG00000002331	Aldh3a1	K00129	EC:1.2.1.5	aldehyde dehydrogenase 3 family, member A1 [Source:RGD Symbol;Acc:2088]	0.906245	1.33741	0.734843	1.81694	2.09876	14.0727	0.165579	-2.59441	down
ko00982	Drug metabolism - cytochrome P450	6.82036e-05	ENSRNOG00000003510	Fmo2	K00485	EC:1.14.13.8	flavin containing dimethylaniline monoxygenase 2 [Source:RGD Symbol;Acc:628600]	36.2628	40.8993	13.9322	160.378	105.178	155.493	0.216351	-2.20855	down
ko00982	Drug metabolism - cytochrome P450	6.82036e-05	ENSRNOG00000003620	Fmo3	K00485	EC:1.14.13.8	flavin containing dimethylaniline monoxygenase 3 [Source:RGD Symbol;Acc:619761]	5.58543	7.00354	2.57024	22.1896	18.4762	39.5247	0.18904	-2.40324	down
ko00982	Drug metabolism - cytochrome P450	6.82036e-05	ENSRNOG00000012436	Adh6	K13951;K13952	EC:1.1.1.1	alcohol dehydrogenase 1 (class I) [Source:RGD Symbol;Acc:2044]	3.44215	4.16162	1.57908	6.77746	7.28181	9.62364	0.387742	-1.36683	down
ko00982	Drug metabolism - cytochrome P450	6.82036e-05	ENSRNOG00000012458	Cyp2e1	K07415	EC:1.14.13.-	cytochrome P450, family 2, subfamily e, polypeptide 1 [Source:RGD Symbol;Acc:2475]	1.59029	2.0422	0.503894	5.70974	4.74285	4.83838	0.270512	-1.88624	down
ko00982	Drug metabolism - cytochrome P450	6.82036e-05	ENSRNOG00000049851	Fmo6	K00485	EC:1.14.13.8	flavin containing monooxygenase 6 [Source:RGD Symbol;Acc:1559491]	0.023136	0.014864	0.04261	0.734681	0.198205	13.4635	0.00559931	-7.48054	down
ko00982	Drug metabolism - cytochrome P450	6.82036e-05	ENSRNOG00000062125	Aox3	K00157	EC:1.2.3.1	aldehyde oxidase 3 [Source:RGD Symbol;Acc:1359328]	0.87407	1.02473	0.56828	1.87058	1.06784	3.69308	0.372024	-1.42653	down
ko05143	African trypanosomiasis	0.000103024	ENSRNOG00000002723	Sele	K06494	NA	selectin E [Source:RGD Symbol;Acc:3654]	2.98187	1.19921	3.6168	0.148222	0.414433	0.461137	7.61667	2.92916	up
ko05143	African trypanosomiasis	0.000103024	ENSRNOG00000004649	Il1b	K04519	NA	interleukin 1 beta [Source:RGD Symbol;Acc:2891]	17.0922	15.7097	15.266	6.22867	5.3594	4.98742	2.89994	1.53602	up
ko05143	African trypanosomiasis	0.000103024	ENSRNOG00000008176	Nppa	K12334	NA	natriuretic peptide A [Source:RGD Symbol;Acc:3193]	0	0	0	0	0	4.77912	6.27731e-05	-13.9595	down
ko05143	African trypanosomiasis	0.000103024	ENSRNOG00000010278	Il6	K05405	NA	interleukin 6 [Source:RGD Symbol;Acc:2901]	3.16485	2.11915	11.0231	0.105601	0.098662	0.045109	65.3927	6.03106	up
ko05143	African trypanosomiasis	0.000103024	ENSRNOG00000045989	Hba-a3	K13822	NA	hemoglobin alpha, adult chain 3 [Source:RGD Symbol;Acc:1359209]	29.1036	33.0564	24.4265	54.478	69.3314	104.209	0.379734	-1.39694	down
ko05143	African trypanosomiasis	0.000103024	ENSRNOG00000047321	Hba-a2	K13822	NA	hemoglobin alpha, adult chain 2 [Source:RGD Symbol;Acc:1359364]	622.608	817.629	600.355	1003.7	1375.98	1844.64	0.483058	-1.04973	down
ko04933	AGE-RAGE signaling pathway in diabetic complications	0.00105619	ENSRNOG00000001414	Serpine1	NA	NA	serpin family E member 1 [Source:RGD Symbol;Acc:3249]	55.409	67.7847	164.683	17.9559	19.5535	21.1919	4.90409	2.29399	up
ko04933	AGE-RAGE signaling pathway in diabetic complications	0.00105619	ENSRNOG00000002723	Sele	K06494	NA	selectin E [Source:RGD Symbol;Acc:3654]	2.98187	1.19921	3.6168	0.148222	0.414433	0.461137	7.61667	2.92916	up
ko04933	AGE-RAGE signaling pathway in diabetic complications	0.00105619	ENSRNOG00000004649	Il1b	K04519	NA	interleukin 1 beta [Source:RGD Symbol;Acc:2891]	17.0922	15.7097	15.266	6.22867	5.3594	4.98742	2.89994	1.53602	up
ko04933	AGE-RAGE signaling pathway in diabetic complications	0.00105619	ENSRNOG00000007159	Ccl2	K14624	NA	C-C motif chemokine ligand 2 [Source:RGD Symbol;Acc:3645]	37.7066	18.9936	41.8423	1.13671	3.71253	3.7896	11.4069	3.51183	up
ko04933	AGE-RAGE signaling pathway in diabetic complications	0.00105619	ENSRNOG00000010278	Il6	K05405	NA	interleukin 6 [Source:RGD Symbol;Acc:2901]	3.16485	2.11915	11.0231	0.105601	0.098662	0.045109	65.3927	6.03106	up
ko04933	AGE-RAGE signaling pathway in diabetic complications	0.00105619	ENSRNOG00000011800	F3	K03901	NA	coagulation factor III, tissue factor [Source:RGD Symbol;Acc:2587]	167.292	169.907	352.923	78.9706	86.6779	136.29	2.28564	1.1926	up
ko04933	AGE-RAGE signaling pathway in diabetic complications	0.00105619	ENSRNOG00000019422	Egr1	K09203	NA	early growth response 1 [Source:RGD Symbol;Acc:2544]	28.8778	81.6766	49.115	5.6807	12.1778	9.44428	5.8481	2.54797	up
ko04933	AGE-RAGE signaling pathway in diabetic complications	0.00105619	ENSRNOG00000029768	Ccl12	K14624	NA	chemokine (C-C motif) ligand 12 [Source:RGD Symbol;Acc:1309255]	6.0007	2.47451	2.57848	0.194217	0.89901	0.367082	7.56941	2.92018	up
ko05133	Pertussis	0.0028717	ENSRNOG00000002843	Cxcl6	K05506	NA	C-X-C motif chemokine ligand 6 [Source:RGD Symbol;Acc:708540]	5.43574	1.71607	3.19644	0.056385	0.662585	1.21597	5.34811	2.41903	up
ko05133	Pertussis	0.0028717	ENSRNOG00000004062	C4bpa	K04002	NA	complement component 4 binding protein, alpha [Source:RGD Symbol;Acc:2235]	58.5906	39.8521	68.5658	21.3697	31.3852	29.0953	2.04042	1.02886	up
ko05133	Pertussis	0.0028717	ENSRNOG00000004649	Il1b	K04519	NA	interleukin 1 beta [Source:RGD Symbol;Acc:2891]	17.0922	15.7097	15.266	6.22867	5.3594	4.98742	2.89994	1.53602	up
ko05133	Pertussis	0.0028717	ENSRNOG00000010278	Il6	K05405	NA	interleukin 6 [Source:RGD Symbol;Acc:2901]	3.16485	2.11915	11.0231	0.105601	0.098662	0.045109	65.3927	6.03106	up
ko05133	Pertussis	0.0028717	ENSRNOG00000011971	C1s	K01331	EC:3.4.21.42	complement C1s [Source:RGD Symbol;Acc:619983]	123.565	79.6933	122.779	24.7306	61.2609	68.3441	2.11252	1.07897	up
ko05133	Pertussis	0.0028717	ENSRNOG00000031955	Calml3	K02183	NA	calmodulin-like 3 [Source:RGD Symbol;Acc:1305499]	8.24095	6.21762	6.22888	7.09436	20.7509	26.911	0.37781	-1.40427	down
ko05146	Amoebiasis	0.00309582	ENSRNOG00000002417	Serpinb10	K13963	NA	serpin family B member 10 [Source:RGD Symbol;Acc:628853]	3.3084	3.22071	3.53922	18.5669	15.1888	5.82974	0.254344	-1.97515	down
ko05146	Amoebiasis	0.00309582	ENSRNOG00000004649	Il1b	K04519	NA	interleukin 1 beta [Source:RGD Symbol;Acc:2891]	17.0922	15.7097	15.266	6.22867	5.3594	4.98742	2.89994	1.53602	up
ko05146	Amoebiasis	0.00309582	ENSRNOG00000010278	Il6	K05405	NA	interleukin 6 [Source:RGD Symbol;Acc:2901]	3.16485	2.11915	11.0231	0.105601	0.098662	0.045109	65.3927	6.03106	up
ko05146	Amoebiasis	0.00309582	ENSRNOG00000013304	Arg1	K01476	EC:3.5.3.1	arginase 1 [Source:RGD Symbol;Acc:2150]	38.2968	26.0177	49.9768	8.35733	12.4054	14.4375	3.24689	1.69906	up
ko05146	Amoebiasis	0.00309582	ENSRNOG00000056129	LOC102554659	K06247	NA	laminin subunit gamma-3-like [Source:RGD Symbol;Acc:7518353]	0.143205	0.092271	0.140703	0.90736	0.821992	0.418494	0.175142	-2.5134	down
ko05146	Amoebiasis	0.00309582	ENSRNOG00000059479	Adcy1	K08041	EC:4.6.1.1	adenylate cyclase 1 [Source:RGD Symbol;Acc:1309318]	0.206208	0.356452	0.124273	1.21653	0.813194	0.51294	0.270163	-1.8881	down
ko05146	Amoebiasis	0.00309582	ENSRNOG00000059507	Lamc3	K06247	NA	laminin subunit gamma 3 [Source:RGD Symbol;Acc:1309399]	0.642198	0.669721	0.48091	3.66613	1.70261	2.05931	0.241359	-2.05075	down
ko01523	Antifolate resistance	0.00337071	ENSRNOG00000004649	Il1b	K04519	NA	interleukin 1 beta [Source:RGD Symbol;Acc:2891]	17.0922	15.7097	15.266	6.22867	5.3594	4.98742	2.89994	1.53602	up
ko01523	Antifolate resistance	0.00337071	ENSRNOG00000010278	Il6	K05405	NA	interleukin 6 [Source:RGD Symbol;Acc:2901]	3.16485	2.11915	11.0231	0.105601	0.098662	0.045109	65.3927	6.03106	up
ko01523	Antifolate resistance	0.00337071	ENSRNOG00000013521	Dhfr	K00287	EC:1.5.1.3	dihydrofolate reductase [Source:RGD Symbol;Acc:2500]	4.22122	4.13326	5.03549	1.90962	1.4482	2.93528	2.12772	1.08931	up
ko01523	Antifolate resistance	0.00337071	ENSRNOG00000019890	Folr2	K13649	NA	folate receptor beta [Source:RGD Symbol;Acc:1308515]	19.4599	17.9835	15.3275	5.25219	6.19225	12.2248	2.22952	1.15673	up
ko04610	Complement and coagulation cascades	0.00405981	ENSRNOG00000001414	Serpine1	NA	NA	serpin family E member 1 [Source:RGD Symbol;Acc:3249]	55.409	67.7847	164.683	17.9559	19.5535	21.1919	4.90409	2.29399	up
ko04610	Complement and coagulation cascades	0.00405981	ENSRNOG00000004062	C4bpa	K04002	NA	complement component 4 binding protein, alpha [Source:RGD Symbol;Acc:2235]	58.5906	39.8521	68.5658	21.3697	31.3852	29.0953	2.04042	1.02886	up
ko04610	Complement and coagulation cascades	0.00405981	ENSRNOG00000011800	F3	K03901	NA	coagulation factor III, tissue factor [Source:RGD Symbol;Acc:2587]	167.292	169.907	352.923	78.9706	86.6779	136.29	2.28564	1.1926	up
ko04610	Complement and coagulation cascades	0.00405981	ENSRNOG00000011971	C1s	K01331	EC:3.4.21.42	complement C1s [Source:RGD Symbol;Acc:619983]	123.565	79.6933	122.779	24.7306	61.2609	68.3441	2.11252	1.07897	up
ko04610	Complement and coagulation cascades	0.00405981	ENSRNOG00000025074	Fgg	K03905	NA	fibrinogen gamma chain [Source:RGD Symbol;Acc:2613]	127.794	78.6948	180.988	61.9913	70.073	37.5544	2.2844	1.19181	up
ko04610	Complement and coagulation cascades	0.00405981	ENSRNOG00000051158	Cfb	K01335	EC:3.4.21.47	complement factor B [Source:RGD Symbol;Acc:2204]	504.105	354.647	440.239	134.428	208.694	220.508	2.30469	1.20457	up
ko05142	Chagas disease (American trypanosomiasis)	0.00460006	ENSRNOG00000001414	Serpine1	NA	NA	serpin family E member 1 [Source:RGD Symbol;Acc:3249]	55.409	67.7847	164.683	17.9559	19.5535	21.1919	4.90409	2.29399	up
ko05142	Chagas disease (American trypanosomiasis)	0.00460006	ENSRNOG00000004649	Il1b	K04519	NA	interleukin 1 beta [Source:RGD Symbol;Acc:2891]	17.0922	15.7097	15.266	6.22867	5.3594	4.98742	2.89994	1.53602	up
ko05142	Chagas disease (American trypanosomiasis)	0.00460006	ENSRNOG00000007159	Ccl2	K14624	NA	C-C motif chemokine ligand 2 [Source:RGD Symbol;Acc:3645]	37.7066	18.9936	41.8423	1.13671	3.71253	3.7896	11.4069	3.51183	up
ko05142	Chagas disease (American trypanosomiasis)	0.00460006	ENSRNOG00000010278	Il6	K05405	NA	interleukin 6 [Source:RGD Symbol;Acc:2901]	3.16485	2.11915	11.0231	0.105601	0.098662	0.045109	65.3927	6.03106	up
ko05142	Chagas disease (American trypanosomiasis)	0.00460006	ENSRNOG00000029768	Ccl12	K14624	NA	chemokine (C-C motif) ligand 12 [Source:RGD Symbol;Acc:1309255]	6.0007	2.47451	2.57848	0.194217	0.89901	0.367082	7.56941	2.92018	up
ko05142	Chagas disease (American trypanosomiasis)	0.00460006	ENSRNOG00000058202	Ppp2r2c	K04354	NA	protein phosphatase 2, regulatory subunit B, gamma [Source:RGD Symbol;Acc:620920]	2.33288	2.81765	3.45571	0.925882	1.19049	0.648675	3.11251	1.63808	up
ko05142	Chagas disease (American trypanosomiasis)	0.00460006	ENSRNOG00000059479	Adcy1	K08041	EC:4.6.1.1	adenylate cyclase 1 [Source:RGD Symbol;Acc:1309318]	0.206208	0.356452	0.124273	1.21653	0.813194	0.51294	0.270163	-1.8881	down
ko05134	Legionellosis	0.00461283	ENSRNOG00000002792	Cxcl2	K05505	NA	C-X-C motif chemokine ligand 2 [Source:RGD Symbol;Acc:70069]	2.67869	3.89774	3.91406	0.2245	0.858824	0.310974	7.52384	2.91147	up
ko05134	Legionellosis	0.00461283	ENSRNOG00000002802	Cxcl1	K05505	NA	C-X-C motif chemokine ligand 1 [Source:RGD Symbol;Acc:619869]	37.7589	31.9443	77.5216	7.05145	18.0701	6.03944	4.72466	2.24021	up
ko05134	Legionellosis	0.00461283	ENSRNOG00000004649	Il1b	K04519	NA	interleukin 1 beta [Source:RGD Symbol;Acc:2891]	17.0922	15.7097	15.266	6.22867	5.3594	4.98742	2.89994	1.53602	up
ko05134	Legionellosis	0.00461283	ENSRNOG00000010278	Il6	K05405	NA	interleukin 6 [Source:RGD Symbol;Acc:2901]	3.16485	2.11915	11.0231	0.105601	0.098662	0.045109	65.3927	6.03106	up
ko05134	Legionellosis	0.00461283	ENSRNOG00000022067	Tlr5	K10168	NA	toll-like receptor 5 [Source:RGD Symbol;Acc:631351]	1.22779	1.25646	1.08737	3.79088	2.48157	3.94515	0.349555	-1.51641	down
ko05132	Salmonella infection	0.00557813	ENSRNOG00000002792	Cxcl2	K05505	NA	C-X-C motif chemokine ligand 2 [Source:RGD Symbol;Acc:70069]	2.67869	3.89774	3.91406	0.2245	0.858824	0.310974	7.52384	2.91147	up
ko05132	Salmonella infection	0.00557813	ENSRNOG00000002802	Cxcl1	K05505	NA	C-X-C motif chemokine ligand 1 [Source:RGD Symbol;Acc:619869]	37.7589	31.9443	77.5216	7.05145	18.0701	6.03944	4.72466	2.24021	up
ko05132	Salmonella infection	0.00557813	ENSRNOG00000004649	Il1b	K04519	NA	interleukin 1 beta [Source:RGD Symbol;Acc:2891]	17.0922	15.7097	15.266	6.22867	5.3594	4.98742	2.89994	1.53602	up
ko05132	Salmonella infection	0.00557813	ENSRNOG00000010278	Il6	K05405	NA	interleukin 6 [Source:RGD Symbol;Acc:2901]	3.16485	2.11915	11.0231	0.105601	0.098662	0.045109	65.3927	6.03106	up
ko05132	Salmonella infection	0.00557813	ENSRNOG00000011406	Ccl4	K12964	NA	C-C motif chemokine ligand 4 [Source:RGD Symbol;Acc:620441]	11.707	5.81372	6.12502	3.35851	3.36341	2.87314	2.46437	1.30122	up
ko05132	Salmonella infection	0.00557813	ENSRNOG00000022067	Tlr5	K10168	NA	toll-like receptor 5 [Source:RGD Symbol;Acc:631351]	1.22779	1.25646	1.08737	3.79088	2.48157	3.94515	0.349555	-1.51641	down
ko04512	ECM-receptor interaction	0.0062889	ENSRNOG00000006569	Itgb8	K06591	NA	integrin subunit beta 8 [Source:RGD Symbol;Acc:1311374]	2.69064	1.81036	3.42008	0.970632	0.984076	0.573387	3.13322	1.64765	up
ko04512	ECM-receptor interaction	0.0062889	ENSRNOG00000010529	Thbs2	K04659	NA	thrombospondin 2 [Source:RGD Symbol;Acc:1310979]	16.9175	9.7328	15.9974	2.57939	6.01878	6.82916	2.76443	1.46698	up
ko04512	ECM-receptor interaction	0.0062889	ENSRNOG00000045829	Thbs1	K16857	NA	thrombospondin 1 [Source:RGD Symbol;Acc:1588455]	69.4641	106.372	164.303	44.915	55.3273	28.7153	2.6376	1.39923	up
ko04512	ECM-receptor interaction	0.0062889	ENSRNOG00000056129	LOC102554659	K06247	NA	laminin subunit gamma-3-like [Source:RGD Symbol;Acc:7518353]	0.143205	0.092271	0.140703	0.90736	0.821992	0.418494	0.175142	-2.5134	down
ko04512	ECM-receptor interaction	0.0062889	ENSRNOG00000058645	Tnc	K06252	NA	tenascin C [Source:RGD Symbol;Acc:621057]	32.8819	24.6221	38.6851	10.8562	17.6057	12.6766	2.33817	1.22538	up
ko04512	ECM-receptor interaction	0.0062889	ENSRNOG00000059507	Lamc3	K06247	NA	laminin subunit gamma 3 [Source:RGD Symbol;Acc:1309399]	0.642198	0.669721	0.48091	3.66613	1.70261	2.05931	0.241359	-2.05075	down
ko04630	Jak-STAT signaling pathway	0.00853262	ENSRNOG00000002946	Socs3	K04696	NA	suppressor of cytokine signaling 3 [Source:RGD Symbol;Acc:621087]	50.4008	65.1614	87.6908	40.5991	23.2455	16.4051	2.53276	1.34071	up
ko04630	Jak-STAT signaling pathway	0.00853262	ENSRNOG00000004470	Il24	K22668	NA	interleukin 24 [Source:RGD Symbol;Acc:621484]	4.71744	2.76935	8.35128	0.401454	0.398275	1.3272	7.44644	2.89655	up
ko04630	Jak-STAT signaling pathway	0.00853262	ENSRNOG00000007002	Lif	K05419	NA	LIF, interleukin 6 family cytokine [Source:RGD Symbol;Acc:620865]	2.79472	2.7336	5.46239	0.880568	1.01865	1.04408	3.73414	1.90078	up
ko04630	Jak-STAT signaling pathway	0.00853262	ENSRNOG00000010278	Il6	K05405	NA	interleukin 6 [Source:RGD Symbol;Acc:2901]	3.16485	2.11915	11.0231	0.105601	0.098662	0.045109	65.3927	6.03106	up
ko04630	Jak-STAT signaling pathway	0.00853262	ENSRNOG00000012259	Il22ra2	K05139	NA	interleukin 22 receptor subunit alpha 2 [Source:RGD Symbol;Acc:1303169]	0.262024	0.379088	0.267647	0.746875	0.470208	3.56018	0.190226	-2.39421	down
ko04630	Jak-STAT signaling pathway	0.00853262	ENSRNOG00000024390	Osm	K05418	NA	oncostatin M [Source:RGD Symbol;Acc:1585012]	2.84715	2.66279	2.36715	1.03466	0.790956	0.679723	3.14413	1.65266	up
ko04630	Jak-STAT signaling pathway	0.00853262	ENSRNOG00000033192	Osmr	K05057	NA	oncostatin M receptor [Source:RGD Symbol;Acc:1302983]	11.718	9.37308	19.7537	4.6298	7.5865	6.30735	2.20501	1.14079	up
ko04630	Jak-STAT signaling pathway	0.00853262	ENSRNOG00000062125	Aox3	K00157	EC:1.2.3.1	aldehyde oxidase 3 [Source:RGD Symbol;Acc:1359328]	0.87407	1.02473	0.56828	1.87058	1.06784	3.69308	0.372024	-1.42653	down
ko04062	Chemokine signaling pathway	0.0101967	ENSRNOG00000000239	Ccl7	K05509	NA	C-C motif chemokine ligand 7 [Source:RGD Symbol;Acc:1359152]	14.4232	11.1589	18.1968	0.371988	1.4184	3.33763	8.53719	3.09376	up
ko04062	Chemokine signaling pathway	0.0101967	ENSRNOG00000002792	Cxcl2	K05505	NA	C-X-C motif chemokine ligand 2 [Source:RGD Symbol;Acc:70069]	2.67869	3.89774	3.91406	0.2245	0.858824	0.310974	7.52384	2.91147	up
ko04062	Chemokine signaling pathway	0.0101967	ENSRNOG00000002802	Cxcl1	K05505	NA	C-X-C motif chemokine ligand 1 [Source:RGD Symbol;Acc:619869]	37.7589	31.9443	77.5216	7.05145	18.0701	6.03944	4.72466	2.24021	up
ko04062	Chemokine signaling pathway	0.0101967	ENSRNOG00000002843	Cxcl6	K05506	NA	C-X-C motif chemokine ligand 6 [Source:RGD Symbol;Acc:708540]	5.43574	1.71607	3.19644	0.056385	0.662585	1.21597	5.34811	2.41903	up
ko04062	Chemokine signaling pathway	0.0101967	ENSRNOG00000007159	Ccl2	K14624	NA	C-C motif chemokine ligand 2 [Source:RGD Symbol;Acc:3645]	37.7066	18.9936	41.8423	1.13671	3.71253	3.7896	11.4069	3.51183	up
ko04062	Chemokine signaling pathway	0.0101967	ENSRNOG00000011406	Ccl4	K12964	NA	C-C motif chemokine ligand 4 [Source:RGD Symbol;Acc:620441]	11.707	5.81372	6.12502	3.35851	3.36341	2.87314	2.46437	1.30122	up
ko04062	Chemokine signaling pathway	0.0101967	ENSRNOG00000011984	Cxcl14	K10033	NA	C-X-C motif chemokine ligand 14 [Source:RGD Symbol;Acc:1307406]	15.4854	17.2001	9.52316	46.4304	41.5978	22.8916	0.380533	-1.39391	down
ko04062	Chemokine signaling pathway	0.0101967	ENSRNOG00000029768	Ccl12	K14624	NA	chemokine (C-C motif) ligand 12 [Source:RGD Symbol;Acc:1309255]	6.0007	2.47451	2.57848	0.194217	0.89901	0.367082	7.56941	2.92018	up
ko04062	Chemokine signaling pathway	0.0101967	ENSRNOG00000059479	Adcy1	K08041	EC:4.6.1.1	adenylate cyclase 1 [Source:RGD Symbol;Acc:1309318]	0.206208	0.356452	0.124273	1.21653	0.813194	0.51294	0.270163	-1.8881	down
ko04978	Mineral absorption	0.0118668	ENSRNOG00000007290	Atp1a2	K01539	EC:7.2.2.13	ATPase Na+/K+ transporting subunit alpha 2 [Source:RGD Symbol;Acc:2168]	1.11361	2.2107	0.439613	6.02731	3.2216	13.5037	0.165429	-2.59572	down
ko04978	Mineral absorption	0.0118668	ENSRNOG00000014117	Hmox1	K00510	EC:1.14.14.18	heme oxygenase 1 [Source:RGD Symbol;Acc:2806]	551.077	151.281	396.168	31.9406	70.2869	56.3487	6.92743	2.79232	up
ko04978	Mineral absorption	0.0118668	ENSRNOG00000020263	Atp1a3	K01539	EC:7.2.2.13	ATPase Na+/K+ transporting subunit alpha 3 [Source:RGD Symbol;Acc:2169]	1.61757	1.90245	1.13016	0.671541	0.692308	0.956255	2.0043	1.0031	up
ko04978	Mineral absorption	0.0118668	ENSRNOG00000043098	Mt2A	K14739	NA	metallothionein 2A [Source:RGD Symbol;Acc:1592345]	46.8268	38.1857	98.9606	22.5488	25.925	34.0743	2.22868	1.15619	up
ko04972	Pancreatic secretion	0.0152152	ENSRNOG00000007290	Atp1a2	K01539	EC:7.2.2.13	ATPase Na+/K+ transporting subunit alpha 2 [Source:RGD Symbol;Acc:2168]	1.11361	2.2107	0.439613	6.02731	3.2216	13.5037	0.165429	-2.59572	down
ko04972	Pancreatic secretion	0.0152152	ENSRNOG00000016945	Pla2g2a	NA	NA	phospholipase A2 group IIA [Source:RGD Symbol;Acc:620857]	430.776	142.041	305.208	31.8882	19.843	49.1573	8.70292	3.1215	up
ko04972	Pancreatic secretion	0.0152152	ENSRNOG00000017060	Ryr2	K04962	NA	ryanodine receptor 2 [Source:RGD Symbol;Acc:620314]	0.186399	0.211602	0.108926	0.285075	0.300051	1.47817	0.245687	-2.0251	down
ko04972	Pancreatic secretion	0.0152152	ENSRNOG00000020263	Atp1a3	K01539	EC:7.2.2.13	ATPase Na+/K+ transporting subunit alpha 3 [Source:RGD Symbol;Acc:2169]	1.61757	1.90245	1.13016	0.671541	0.692308	0.956255	2.0043	1.0031	up
ko04972	Pancreatic secretion	0.0152152	ENSRNOG00000021619	Cela3b	K01345	EC:3.4.21.70	chymotrypsin like elastase 3B [Source:RGD Symbol;Acc:1307819]	4.59201	1.0716	1.36544	0.166971	0.241357	0.602875	6.95118	2.79726	up
ko04972	Pancreatic secretion	0.0152152	ENSRNOG00000059479	Adcy1	K08041	EC:4.6.1.1	adenylate cyclase 1 [Source:RGD Symbol;Acc:1309318]	0.206208	0.356452	0.124273	1.21653	0.813194	0.51294	0.270163	-1.8881	down
ko04151	PI3K-Akt signaling pathway	0.017319	ENSRNOG00000002754	Areg	K09782	NA	amphiregulin [Source:RGD Symbol;Acc:2149]	15.0098	32.3225	41.5271	8.39391	7.3053	7.32716	3.85902	1.94824	up
ko04151	PI3K-Akt signaling pathway	0.017319	ENSRNOG00000002771	Ereg	K09784	NA	epiregulin [Source:RGD Symbol;Acc:620299]	3.53527	6.81166	10.5663	1.17724	1.04308	1.27508	5.98307	2.58089	up
ko04151	PI3K-Akt signaling pathway	0.017319	ENSRNOG00000006569	Itgb8	K06591	NA	integrin subunit beta 8 [Source:RGD Symbol;Acc:1311374]	2.69064	1.81036	3.42008	0.970632	0.984076	0.573387	3.13322	1.64765	up
ko04151	PI3K-Akt signaling pathway	0.017319	ENSRNOG00000010278	Il6	K05405	NA	interleukin 6 [Source:RGD Symbol;Acc:2901]	3.16485	2.11915	11.0231	0.105601	0.098662	0.045109	65.3927	6.03106	up
ko04151	PI3K-Akt signaling pathway	0.017319	ENSRNOG00000010529	Thbs2	K04659	NA	thrombospondin 2 [Source:RGD Symbol;Acc:1310979]	16.9175	9.7328	15.9974	2.57939	6.01878	6.82916	2.76443	1.46698	up
ko04151	PI3K-Akt signaling pathway	0.017319	ENSRNOG00000018839	Ntrk2	K04360	EC:2.7.10.1	neurotrophic receptor tyrosine kinase 2 [Source:RGD Symbol;Acc:3213]	2.74908	5.01041	5.1754	1.89725	0.712652	1.98932	2.81241	1.49181	up
ko04151	PI3K-Akt signaling pathway	0.017319	ENSRNOG00000024390	Osm	K05418	NA	oncostatin M [Source:RGD Symbol;Acc:1585012]	2.84715	2.66279	2.36715	1.03466	0.790956	0.679723	3.14413	1.65266	up
ko04151	PI3K-Akt signaling pathway	0.017319	ENSRNOG00000033192	Osmr	K05057	NA	oncostatin M receptor [Source:RGD Symbol;Acc:1302983]	11.718	9.37308	19.7537	4.6298	7.5865	6.30735	2.20501	1.14079	up
ko04151	PI3K-Akt signaling pathway	0.017319	ENSRNOG00000045829	Thbs1	K16857	NA	thrombospondin 1 [Source:RGD Symbol;Acc:1588455]	69.4641	106.372	164.303	44.915	55.3273	28.7153	2.6376	1.39923	up
ko04151	PI3K-Akt signaling pathway	0.017319	ENSRNOG00000056129	LOC102554659	K06247	NA	laminin subunit gamma-3-like [Source:RGD Symbol;Acc:7518353]	0.143205	0.092271	0.140703	0.90736	0.821992	0.418494	0.175142	-2.5134	down
ko04151	PI3K-Akt signaling pathway	0.017319	ENSRNOG00000058202	Ppp2r2c	K04354	NA	protein phosphatase 2, regulatory subunit B, gamma [Source:RGD Symbol;Acc:620920]	2.33288	2.81765	3.45571	0.925882	1.19049	0.648675	3.11251	1.63808	up
ko04151	PI3K-Akt signaling pathway	0.017319	ENSRNOG00000058645	Tnc	K06252	NA	tenascin C [Source:RGD Symbol;Acc:621057]	32.8819	24.6221	38.6851	10.8562	17.6057	12.6766	2.33817	1.22538	up
ko04151	PI3K-Akt signaling pathway	0.017319	ENSRNOG00000059507	Lamc3	K06247	NA	laminin subunit gamma 3 [Source:RGD Symbol;Acc:1309399]	0.642198	0.669721	0.48091	3.66613	1.70261	2.05931	0.241359	-2.05075	down
ko04260	Cardiac muscle contraction	0.0189091	ENSRNOG00000007290	Atp1a2	K01539	EC:7.2.2.13	ATPase Na+/K+ transporting subunit alpha 2 [Source:RGD Symbol;Acc:2168]	1.11361	2.2107	0.439613	6.02731	3.2216	13.5037	0.165429	-2.59572	down
ko04260	Cardiac muscle contraction	0.0189091	ENSRNOG00000014656	Cox8b	K02273	NA	cytochrome c oxidase, subunit VIIIb [Source:RGD Symbol;Acc:2386]	0.277625	0.746188	0	1.76709	3.81586	10.2263	0.0647605	-3.94874	down
ko04260	Cardiac muscle contraction	0.0189091	ENSRNOG00000016983	Myh7	K17751	NA	myosin heavy chain 7 [Source:RGD Symbol;Acc:62030]	0	0.002143	0	0.00806	0.008274	5.03787	0.000424004	-11.2036	down
ko04260	Cardiac muscle contraction	0.0189091	ENSRNOG00000017060	Ryr2	K04962	NA	ryanodine receptor 2 [Source:RGD Symbol;Acc:620314]	0.186399	0.211602	0.108926	0.285075	0.300051	1.47817	0.245687	-2.0251	down
ko04260	Cardiac muscle contraction	0.0189091	ENSRNOG00000020263	Atp1a3	K01539	EC:7.2.2.13	ATPase Na+/K+ transporting subunit alpha 3 [Source:RGD Symbol;Acc:2169]	1.61757	1.90245	1.13016	0.671541	0.692308	0.956255	2.0043	1.0031	up
ko04710	Circadian rhythm	0.0224014	ENSRNOG00000014448	Arntl	NA	NA	aryl hydrocarbon receptor nuclear translocator-like [Source:RGD Symbol;Acc:62003]	7.69285	5.52374	7.07682	4.26659	2.17754	3.16265	2.1124	1.07889	up
ko04710	Circadian rhythm	0.0224014	ENSRNOG00000018413	Per3	K21945	NA	period circadian regulator 3 [Source:RGD Symbol;Acc:621581]	4.81173	7.50402	4.2525	12.0606	17.1225	18.8685	0.344801	-1.53616	down
ko04710	Circadian rhythm	0.0224014	ENSRNOG00000020254	Per2	K02633	NA	period circadian regulator 2 [Source:RGD Symbol;Acc:61945]	5.08553	8.59563	7.97541	10.986	14.3571	23.4713	0.443651	-1.1725	down
ko00980	Metabolism of xenobiotics by cytochrome P450	0.0236714	ENSRNOG00000002331	Aldh3a1	K00129	EC:1.2.1.5	aldehyde dehydrogenase 3 family, member A1 [Source:RGD Symbol;Acc:2088]	0.906245	1.33741	0.734843	1.81694	2.09876	14.0727	0.165579	-2.59441	down
ko00980	Metabolism of xenobiotics by cytochrome P450	0.0236714	ENSRNOG00000012436	Adh6	K13951;K13952	EC:1.1.1.1	alcohol dehydrogenase 1 (class I) [Source:RGD Symbol;Acc:2044]	3.44215	4.16162	1.57908	6.77746	7.28181	9.62364	0.387742	-1.36683	down
ko00980	Metabolism of xenobiotics by cytochrome P450	0.0236714	ENSRNOG00000012458	Cyp2e1	K07415	EC:1.14.13.-	cytochrome P450, family 2, subfamily e, polypeptide 1 [Source:RGD Symbol;Acc:2475]	1.59029	2.0422	0.503894	5.70974	4.74285	4.83838	0.270512	-1.88624	down
ko00980	Metabolism of xenobiotics by cytochrome P450	0.0236714	ENSRNOG00000019500	Cyp1a1	K07408	EC:1.14.14.1	cytochrome P450, family 1, subfamily a, polypeptide 1 [Source:RGD Symbol;Acc:2458]	3.79747	8.76837	3.6107	28.2685	25.6761	8.90865	0.25737	-1.95808	down
ko04261	Adrenergic signaling in cardiomyocytes	0.0245595	ENSRNOG00000007290	Atp1a2	K01539	EC:7.2.2.13	ATPase Na+/K+ transporting subunit alpha 2 [Source:RGD Symbol;Acc:2168]	1.11361	2.2107	0.439613	6.02731	3.2216	13.5037	0.165429	-2.59572	down
ko04261	Adrenergic signaling in cardiomyocytes	0.0245595	ENSRNOG00000016983	Myh7	K17751	NA	myosin heavy chain 7 [Source:RGD Symbol;Acc:62030]	0	0.002143	0	0.00806	0.008274	5.03787	0.000424004	-11.2036	down
ko04261	Adrenergic signaling in cardiomyocytes	0.0245595	ENSRNOG00000017060	Ryr2	K04962	NA	ryanodine receptor 2 [Source:RGD Symbol;Acc:620314]	0.186399	0.211602	0.108926	0.285075	0.300051	1.47817	0.245687	-2.0251	down
ko04261	Adrenergic signaling in cardiomyocytes	0.0245595	ENSRNOG00000020263	Atp1a3	K01539	EC:7.2.2.13	ATPase Na+/K+ transporting subunit alpha 3 [Source:RGD Symbol;Acc:2169]	1.61757	1.90245	1.13016	0.671541	0.692308	0.956255	2.0043	1.0031	up
ko04261	Adrenergic signaling in cardiomyocytes	0.0245595	ENSRNOG00000031955	Calml3	K02183	NA	calmodulin-like 3 [Source:RGD Symbol;Acc:1305499]	8.24095	6.21762	6.22888	7.09436	20.7509	26.911	0.37781	-1.40427	down
ko04261	Adrenergic signaling in cardiomyocytes	0.0245595	ENSRNOG00000058202	Ppp2r2c	K04354	NA	protein phosphatase 2, regulatory subunit B, gamma [Source:RGD Symbol;Acc:620920]	2.33288	2.81765	3.45571	0.925882	1.19049	0.648675	3.11251	1.63808	up
ko04261	Adrenergic signaling in cardiomyocytes	0.0245595	ENSRNOG00000059479	Adcy1	K08041	EC:4.6.1.1	adenylate cyclase 1 [Source:RGD Symbol;Acc:1309318]	0.206208	0.356452	0.124273	1.21653	0.813194	0.51294	0.270163	-1.8881	down
ko05323	Rheumatoid arthritis	0.0265711	ENSRNOG00000002843	Cxcl6	K05506	NA	C-X-C motif chemokine ligand 6 [Source:RGD Symbol;Acc:708540]	5.43574	1.71607	3.19644	0.056385	0.662585	1.21597	5.34811	2.41903	up
ko05323	Rheumatoid arthritis	0.0265711	ENSRNOG00000004649	Il1b	K04519	NA	interleukin 1 beta [Source:RGD Symbol;Acc:2891]	17.0922	15.7097	15.266	6.22867	5.3594	4.98742	2.89994	1.53602	up
ko05323	Rheumatoid arthritis	0.0265711	ENSRNOG00000007159	Ccl2	K14624	NA	C-C motif chemokine ligand 2 [Source:RGD Symbol;Acc:3645]	37.7066	18.9936	41.8423	1.13671	3.71253	3.7896	11.4069	3.51183	up
ko05323	Rheumatoid arthritis	0.0265711	ENSRNOG00000010278	Il6	K05405	NA	interleukin 6 [Source:RGD Symbol;Acc:2901]	3.16485	2.11915	11.0231	0.105601	0.098662	0.045109	65.3927	6.03106	up
ko05323	Rheumatoid arthritis	0.0265711	ENSRNOG00000029768	Ccl12	K14624	NA	chemokine (C-C motif) ligand 12 [Source:RGD Symbol;Acc:1309255]	6.0007	2.47451	2.57848	0.194217	0.89901	0.367082	7.56941	2.92018	up
ko04911	Insulin secretion	0.0278058	ENSRNOG00000007290	Atp1a2	K01539	EC:7.2.2.13	ATPase Na+/K+ transporting subunit alpha 2 [Source:RGD Symbol;Acc:2168]	1.11361	2.2107	0.439613	6.02731	3.2216	13.5037	0.165429	-2.59572	down
ko04911	Insulin secretion	0.0278058	ENSRNOG00000017060	Ryr2	K04962	NA	ryanodine receptor 2 [Source:RGD Symbol;Acc:620314]	0.186399	0.211602	0.108926	0.285075	0.300051	1.47817	0.245687	-2.0251	down
ko04911	Insulin secretion	0.0278058	ENSRNOG00000019433	Rab3a	K07882	NA	RAB3A, member RAS oncogene family [Source:RGD Symbol;Acc:3528]	5.25359	6.66674	3.95532	13.6283	11.8968	8.19245	0.470843	-1.08668	down
ko04911	Insulin secretion	0.0278058	ENSRNOG00000020263	Atp1a3	K01539	EC:7.2.2.13	ATPase Na+/K+ transporting subunit alpha 3 [Source:RGD Symbol;Acc:2169]	1.61757	1.90245	1.13016	0.671541	0.692308	0.956255	2.0043	1.0031	up
ko04911	Insulin secretion	0.0278058	ENSRNOG00000059479	Adcy1	K08041	EC:4.6.1.1	adenylate cyclase 1 [Source:RGD Symbol;Acc:1309318]	0.206208	0.356452	0.124273	1.21653	0.813194	0.51294	0.270163	-1.8881	down
ko05150	Staphylococcus aureus infection	0.0282277	ENSRNOG00000002794	Selp	K06496	NA	selectin P [Source:RGD Symbol;Acc:3656]	3.596	2.43421	6.01392	0.725463	1.69202	1.63187	2.97434	1.57257	up
ko05150	Staphylococcus aureus infection	0.0282277	ENSRNOG00000011971	C1s	K01331	EC:3.4.21.42	complement C1s [Source:RGD Symbol;Acc:619983]	123.565	79.6933	122.779	24.7306	61.2609	68.3441	2.11252	1.07897	up
ko05150	Staphylococcus aureus infection	0.0282277	ENSRNOG00000025074	Fgg	K03905	NA	fibrinogen gamma chain [Source:RGD Symbol;Acc:2613]	127.794	78.6948	180.988	61.9913	70.073	37.5544	2.2844	1.19181	up
ko05150	Staphylococcus aureus infection	0.0282277	ENSRNOG00000051158	Cfb	K01335	EC:3.4.21.47	complement factor B [Source:RGD Symbol;Acc:2204]	504.105	354.647	440.239	134.428	208.694	220.508	2.30469	1.20457	up
ko05020	Prion diseases	0.0288093	ENSRNOG00000004649	Il1b	K04519	NA	interleukin 1 beta [Source:RGD Symbol;Acc:2891]	17.0922	15.7097	15.266	6.22867	5.3594	4.98742	2.89994	1.53602	up
ko05020	Prion diseases	0.0288093	ENSRNOG00000010278	Il6	K05405	NA	interleukin 6 [Source:RGD Symbol;Acc:2901]	3.16485	2.11915	11.0231	0.105601	0.098662	0.045109	65.3927	6.03106	up
ko05020	Prion diseases	0.0288093	ENSRNOG00000019422	Egr1	K09203	NA	early growth response 1 [Source:RGD Symbol;Acc:2544]	28.8778	81.6766	49.115	5.6807	12.1778	9.44428	5.8481	2.54797	up
ko05410	Hypertrophic cardiomyopathy (HCM)	0.0290764	ENSRNOG00000002372	Sgcd	K12563	NA	sarcoglycan, delta [Source:RGD Symbol;Acc:1306638]	0.93466	1.49454	1.00184	2.76866	3.11875	2.25635	0.421309	-1.24705	down
ko05410	Hypertrophic cardiomyopathy (HCM)	0.0290764	ENSRNOG00000006569	Itgb8	K06591	NA	integrin subunit beta 8 [Source:RGD Symbol;Acc:1311374]	2.69064	1.81036	3.42008	0.970632	0.984076	0.573387	3.13322	1.64765	up
ko05410	Hypertrophic cardiomyopathy (HCM)	0.0290764	ENSRNOG00000010278	Il6	K05405	NA	interleukin 6 [Source:RGD Symbol;Acc:2901]	3.16485	2.11915	11.0231	0.105601	0.098662	0.045109	65.3927	6.03106	up
ko05410	Hypertrophic cardiomyopathy (HCM)	0.0290764	ENSRNOG00000016983	Myh7	K17751	NA	myosin heavy chain 7 [Source:RGD Symbol;Acc:62030]	0	0.002143	0	0.00806	0.008274	5.03787	0.000424004	-11.2036	down
ko05410	Hypertrophic cardiomyopathy (HCM)	0.0290764	ENSRNOG00000017060	Ryr2	K04962	NA	ryanodine receptor 2 [Source:RGD Symbol;Acc:620314]	0.186399	0.211602	0.108926	0.285075	0.300051	1.47817	0.245687	-2.0251	down
ko00591	Linoleic acid metabolism	0.0311386	ENSRNOG00000012458	Cyp2e1	K07415	EC:1.14.13.-	cytochrome P450, family 2, subfamily e, polypeptide 1 [Source:RGD Symbol;Acc:2475]	1.59029	2.0422	0.503894	5.70974	4.74285	4.83838	0.270512	-1.88624	down
ko00591	Linoleic acid metabolism	0.0311386	ENSRNOG00000016945	Pla2g2a	NA	NA	phospholipase A2 group IIA [Source:RGD Symbol;Acc:620857]	430.776	142.041	305.208	31.8882	19.843	49.1573	8.70292	3.1215	up
ko00591	Linoleic acid metabolism	0.0311386	ENSRNOG00000019183	Alox15	K00460	EC:1.13.11.33	arachidonate 15-lipoxygenase [Source:RGD Symbol;Acc:70493]	3.17012	1.75927	2.65063	3.59856	4.73835	17.0034	0.299129	-1.74116	down
ko00350	Tyrosine metabolism	0.0311386	ENSRNOG00000002331	Aldh3a1	K00129	EC:1.2.1.5	aldehyde dehydrogenase 3 family, member A1 [Source:RGD Symbol;Acc:2088]	0.906245	1.33741	0.734843	1.81694	2.09876	14.0727	0.165579	-2.59441	down
ko00350	Tyrosine metabolism	0.0311386	ENSRNOG00000012436	Adh6	K13951;K13952	EC:1.1.1.1	alcohol dehydrogenase 1 (class I) [Source:RGD Symbol;Acc:2044]	3.44215	4.16162	1.57908	6.77746	7.28181	9.62364	0.387742	-1.36683	down
ko00350	Tyrosine metabolism	0.0311386	ENSRNOG00000062125	Aox3	K00157	EC:1.2.3.1	aldehyde oxidase 3 [Source:RGD Symbol;Acc:1359328]	0.87407	1.02473	0.56828	1.87058	1.06784	3.69308	0.372024	-1.42653	down
ko00830	Retinol metabolism	0.031536	ENSRNOG00000012436	Adh6	K13951;K13952	EC:1.1.1.1	alcohol dehydrogenase 1 (class I) [Source:RGD Symbol;Acc:2044]	3.44215	4.16162	1.57908	6.77746	7.28181	9.62364	0.387742	-1.36683	down
ko00830	Retinol metabolism	0.031536	ENSRNOG00000019500	Cyp1a1	K07408	EC:1.14.14.1	cytochrome P450, family 1, subfamily a, polypeptide 1 [Source:RGD Symbol;Acc:2458]	3.79747	8.76837	3.6107	28.2685	25.6761	8.90865	0.25737	-1.95808	down
ko00830	Retinol metabolism	0.031536	ENSRNOG00000058568	Dhrs9	K11149	EC:1.1.-.-	dehydrogenase/reductase 9 [Source:RGD Symbol;Acc:620655]	9.49096	6.67188	18.1665	1.17878	2.82958	3.45117	4.60207	2.20228	up
ko00830	Retinol metabolism	0.031536	ENSRNOG00000062125	Aox3	K00157	EC:1.2.3.1	aldehyde oxidase 3 [Source:RGD Symbol;Acc:1359328]	0.87407	1.02473	0.56828	1.87058	1.06784	3.69308	0.372024	-1.42653	down
ko04974	Protein digestion and absorption	0.0345239	ENSRNOG00000007290	Atp1a2	K01539	EC:7.2.2.13	ATPase Na+/K+ transporting subunit alpha 2 [Source:RGD Symbol;Acc:2168]	1.11361	2.2107	0.439613	6.02731	3.2216	13.5037	0.165429	-2.59572	down
ko04974	Protein digestion and absorption	0.0345239	ENSRNOG00000014143	Col24a1	K19721	NA	collagen type XXIV alpha 1 chain [Source:RGD Symbol;Acc:1565539]	0.113145	0.123763	0.067519	0.442035	0.327394	0.338754	0.274708	-1.86403	down
ko04974	Protein digestion and absorption	0.0345239	ENSRNOG00000020263	Atp1a3	K01539	EC:7.2.2.13	ATPase Na+/K+ transporting subunit alpha 3 [Source:RGD Symbol;Acc:2169]	1.61757	1.90245	1.13016	0.671541	0.692308	0.956255	2.0043	1.0031	up
ko04974	Protein digestion and absorption	0.0345239	ENSRNOG00000021619	Cela3b	K01345	EC:3.4.21.70	chymotrypsin like elastase 3B [Source:RGD Symbol;Acc:1307819]	4.59201	1.0716	1.36544	0.166971	0.241357	0.602875	6.95118	2.79726	up
ko04974	Protein digestion and absorption	0.0345239	ENSRNOG00000051399	Col10a1	K19479	NA	collagen type X alpha 1 chain [Source:RGD Symbol;Acc:2371]	0	0.048914	0.043329	0.098932	0.11115	2.12458	0.0395102	-4.66163	down
ko05414	Dilated cardiomyopathy (DCM)	0.0345239	ENSRNOG00000002372	Sgcd	K12563	NA	sarcoglycan, delta [Source:RGD Symbol;Acc:1306638]	0.93466	1.49454	1.00184	2.76866	3.11875	2.25635	0.421309	-1.24705	down
ko05414	Dilated cardiomyopathy (DCM)	0.0345239	ENSRNOG00000006569	Itgb8	K06591	NA	integrin subunit beta 8 [Source:RGD Symbol;Acc:1311374]	2.69064	1.81036	3.42008	0.970632	0.984076	0.573387	3.13322	1.64765	up
ko05414	Dilated cardiomyopathy (DCM)	0.0345239	ENSRNOG00000016983	Myh7	K17751	NA	myosin heavy chain 7 [Source:RGD Symbol;Acc:62030]	0	0.002143	0	0.00806	0.008274	5.03787	0.000424004	-11.2036	down
ko05414	Dilated cardiomyopathy (DCM)	0.0345239	ENSRNOG00000017060	Ryr2	K04962	NA	ryanodine receptor 2 [Source:RGD Symbol;Acc:620314]	0.186399	0.211602	0.108926	0.285075	0.300051	1.47817	0.245687	-2.0251	down
ko05414	Dilated cardiomyopathy (DCM)	0.0345239	ENSRNOG00000059479	Adcy1	K08041	EC:4.6.1.1	adenylate cyclase 1 [Source:RGD Symbol;Acc:1309318]	0.206208	0.356452	0.124273	1.21653	0.813194	0.51294	0.270163	-1.8881	down
ko04960	Aldosterone-regulated sodium reabsorption	0.0414104	ENSRNOG00000007290	Atp1a2	K01539	EC:7.2.2.13	ATPase Na+/K+ transporting subunit alpha 2 [Source:RGD Symbol;Acc:2168]	1.11361	2.2107	0.439613	6.02731	3.2216	13.5037	0.165429	-2.59572	down
ko04960	Aldosterone-regulated sodium reabsorption	0.0414104	ENSRNOG00000020263	Atp1a3	K01539	EC:7.2.2.13	ATPase Na+/K+ transporting subunit alpha 3 [Source:RGD Symbol;Acc:2169]	1.61757	1.90245	1.13016	0.671541	0.692308	0.956255	2.0043	1.0031	up
ko04960	Aldosterone-regulated sodium reabsorption	0.0414104	ENSRNOG00000033153	Sfn	K06644	NA	stratifin [Source:RGD Symbol;Acc:1304729]	22.9356	14.9716	33.5055	3.6868	3.29296	10.7613	4.02529	2.00909	up
ko04621	NOD-like receptor signaling pathway	0.0430287	ENSRNOG00000002792	Cxcl2	K05505	NA	C-X-C motif chemokine ligand 2 [Source:RGD Symbol;Acc:70069]	2.67869	3.89774	3.91406	0.2245	0.858824	0.310974	7.52384	2.91147	up
ko04621	NOD-like receptor signaling pathway	0.0430287	ENSRNOG00000002802	Cxcl1	K05505	NA	C-X-C motif chemokine ligand 1 [Source:RGD Symbol;Acc:619869]	37.7589	31.9443	77.5216	7.05145	18.0701	6.03944	4.72466	2.24021	up
ko04621	NOD-like receptor signaling pathway	0.0430287	ENSRNOG00000004649	Il1b	K04519	NA	interleukin 1 beta [Source:RGD Symbol;Acc:2891]	17.0922	15.7097	15.266	6.22867	5.3594	4.98742	2.89994	1.53602	up
ko04621	NOD-like receptor signaling pathway	0.0430287	ENSRNOG00000007159	Ccl2	K14624	NA	C-C motif chemokine ligand 2 [Source:RGD Symbol;Acc:3645]	37.7066	18.9936	41.8423	1.13671	3.71253	3.7896	11.4069	3.51183	up
ko04621	NOD-like receptor signaling pathway	0.0430287	ENSRNOG00000008134	Mefv	K12803	NA	MEFV innate immuity regulator, pyrin [Source:RGD Symbol;Acc:61889]	1.83577	1.73826	2.28247	1.12284	0.676735	1.11478	2.00954	1.00686	up
ko04621	NOD-like receptor signaling pathway	0.0430287	ENSRNOG00000010278	Il6	K05405	NA	interleukin 6 [Source:RGD Symbol;Acc:2901]	3.16485	2.11915	11.0231	0.105601	0.098662	0.045109	65.3927	6.03106	up
ko04621	NOD-like receptor signaling pathway	0.0430287	ENSRNOG00000029768	Ccl12	K14624	NA	chemokine (C-C motif) ligand 12 [Source:RGD Symbol;Acc:1309255]	6.0007	2.47451	2.57848	0.194217	0.89901	0.367082	7.56941	2.92018	up
ko04713	Circadian entrainment	0.0454942	ENSRNOG00000017060	Ryr2	K04962	NA	ryanodine receptor 2 [Source:RGD Symbol;Acc:620314]	0.186399	0.211602	0.108926	0.285075	0.300051	1.47817	0.245687	-2.0251	down
ko04713	Circadian entrainment	0.0454942	ENSRNOG00000018413	Per3	K21945	NA	period circadian regulator 3 [Source:RGD Symbol;Acc:621581]	4.81173	7.50402	4.2525	12.0606	17.1225	18.8685	0.344801	-1.53616	down
ko04713	Circadian entrainment	0.0454942	ENSRNOG00000020254	Per2	K02633	NA	period circadian regulator 2 [Source:RGD Symbol;Acc:61945]	5.08553	8.59563	7.97541	10.986	14.3571	23.4713	0.443651	-1.1725	down
ko04713	Circadian entrainment	0.0454942	ENSRNOG00000031955	Calml3	K02183	NA	calmodulin-like 3 [Source:RGD Symbol;Acc:1305499]	8.24095	6.21762	6.22888	7.09436	20.7509	26.911	0.37781	-1.40427	down
ko04713	Circadian entrainment	0.0454942	ENSRNOG00000059479	Adcy1	K08041	EC:4.6.1.1	adenylate cyclase 1 [Source:RGD Symbol;Acc:1309318]	0.206208	0.356452	0.124273	1.21653	0.813194	0.51294	0.270163	-1.8881	down
ko04925	Aldosterone synthesis and secretion	0.0454942	ENSRNOG00000007290	Atp1a2	K01539	EC:7.2.2.13	ATPase Na+/K+ transporting subunit alpha 2 [Source:RGD Symbol;Acc:2168]	1.11361	2.2107	0.439613	6.02731	3.2216	13.5037	0.165429	-2.59572	down
ko04925	Aldosterone synthesis and secretion	0.0454942	ENSRNOG00000008176	Nppa	K12334	NA	natriuretic peptide A [Source:RGD Symbol;Acc:3193]	0	0	0	0	0	4.77912	6.27731e-05	-13.9595	down
ko04925	Aldosterone synthesis and secretion	0.0454942	ENSRNOG00000020263	Atp1a3	K01539	EC:7.2.2.13	ATPase Na+/K+ transporting subunit alpha 3 [Source:RGD Symbol;Acc:2169]	1.61757	1.90245	1.13016	0.671541	0.692308	0.956255	2.0043	1.0031	up
ko04925	Aldosterone synthesis and secretion	0.0454942	ENSRNOG00000031955	Calml3	K02183	NA	calmodulin-like 3 [Source:RGD Symbol;Acc:1305499]	8.24095	6.21762	6.22888	7.09436	20.7509	26.911	0.37781	-1.40427	down
ko04925	Aldosterone synthesis and secretion	0.0454942	ENSRNOG00000059479	Adcy1	K08041	EC:4.6.1.1	adenylate cyclase 1 [Source:RGD Symbol;Acc:1309318]	0.206208	0.356452	0.124273	1.21653	0.813194	0.51294	0.270163	-1.8881	down
ko04216	Ferroptosis	0.047109	ENSRNOG00000010210	Slc7a11	K13869	NA	solute carrier family 7 member 11 [Source:RGD Symbol;Acc:1309275]	0.785658	0.686638	0.778759	0.116861	0.130128	0.355379	3.73701	1.90188	up
ko04216	Ferroptosis	0.047109	ENSRNOG00000014117	Hmox1	K00510	EC:1.14.14.18	heme oxygenase 1 [Source:RGD Symbol;Acc:2806]	551.077	151.281	396.168	31.9406	70.2869	56.3487	6.92743	2.79232	up
ko04216	Ferroptosis	0.047109	ENSRNOG00000019183	Alox15	K00460	EC:1.13.11.33	arachidonate 15-lipoxygenase [Source:RGD Symbol;Acc:70493]	3.17012	1.75927	2.65063	3.59856	4.73835	17.0034	0.299129	-1.74116	down
ko04022	cGMP-PKG signaling pathway	0.0507699	ENSRNOG00000007290	Atp1a2	K01539	EC:7.2.2.13	ATPase Na+/K+ transporting subunit alpha 2 [Source:RGD Symbol;Acc:2168]	1.11361	2.2107	0.439613	6.02731	3.2216	13.5037	0.165429	-2.59572	down
ko04022	cGMP-PKG signaling pathway	0.0507699	ENSRNOG00000008176	Nppa	K12334	NA	natriuretic peptide A [Source:RGD Symbol;Acc:3193]	0	0	0	0	0	4.77912	6.27731e-05	-13.9595	down
ko04022	cGMP-PKG signaling pathway	0.0507699	ENSRNOG00000013887	Adra2b	K04139	NA	adrenoceptor alpha 2B [Source:RGD Symbol;Acc:2057]	0.323727	0.349478	0.234101	1.5404	0.988549	0.490279	0.300509	-1.73452	down
ko04022	cGMP-PKG signaling pathway	0.0507699	ENSRNOG00000016983	Myh7	K17751	NA	myosin heavy chain 7 [Source:RGD Symbol;Acc:62030]	0	0.002143	0	0.00806	0.008274	5.03787	0.000424004	-11.2036	down
ko04022	cGMP-PKG signaling pathway	0.0507699	ENSRNOG00000020263	Atp1a3	K01539	EC:7.2.2.13	ATPase Na+/K+ transporting subunit alpha 3 [Source:RGD Symbol;Acc:2169]	1.61757	1.90245	1.13016	0.671541	0.692308	0.956255	2.0043	1.0031	up
ko04022	cGMP-PKG signaling pathway	0.0507699	ENSRNOG00000031955	Calml3	K02183	NA	calmodulin-like 3 [Source:RGD Symbol;Acc:1305499]	8.24095	6.21762	6.22888	7.09436	20.7509	26.911	0.37781	-1.40427	down
ko04022	cGMP-PKG signaling pathway	0.0507699	ENSRNOG00000059479	Adcy1	K08041	EC:4.6.1.1	adenylate cyclase 1 [Source:RGD Symbol;Acc:1309318]	0.206208	0.356452	0.124273	1.21653	0.813194	0.51294	0.270163	-1.8881	down
ko00670	One carbon pool by folate	0.0508149	ENSRNOG00000008586	Aldh1l2	K00289	EC:1.5.1.6	aldehyde dehydrogenase 1 family, member L2 [Source:RGD Symbol;Acc:1309458]	1.58045	0.639397	1.11351	0.097725	0.378507	0.428929	3.68262	1.88073	up
ko00670	One carbon pool by folate	0.0508149	ENSRNOG00000013521	Dhfr	K00287	EC:1.5.1.3	dihydrofolate reductase [Source:RGD Symbol;Acc:2500]	4.22122	4.13326	5.03549	1.90962	1.4482	2.93528	2.12772	1.08931	up
ko05204	Chemical carcinogenesis	0.051378	ENSRNOG00000002331	Aldh3a1	K00129	EC:1.2.1.5	aldehyde dehydrogenase 3 family, member A1 [Source:RGD Symbol;Acc:2088]	0.906245	1.33741	0.734843	1.81694	2.09876	14.0727	0.165579	-2.59441	down
ko05204	Chemical carcinogenesis	0.051378	ENSRNOG00000012436	Adh6	K13951;K13952	EC:1.1.1.1	alcohol dehydrogenase 1 (class I) [Source:RGD Symbol;Acc:2044]	3.44215	4.16162	1.57908	6.77746	7.28181	9.62364	0.387742	-1.36683	down
ko05204	Chemical carcinogenesis	0.051378	ENSRNOG00000012458	Cyp2e1	K07415	EC:1.14.13.-	cytochrome P450, family 2, subfamily e, polypeptide 1 [Source:RGD Symbol;Acc:2475]	1.59029	2.0422	0.503894	5.70974	4.74285	4.83838	0.270512	-1.88624	down
ko05204	Chemical carcinogenesis	0.051378	ENSRNOG00000019500	Cyp1a1	K07408	EC:1.14.14.1	cytochrome P450, family 1, subfamily a, polypeptide 1 [Source:RGD Symbol;Acc:2458]	3.79747	8.76837	3.6107	28.2685	25.6761	8.90865	0.25737	-1.95808	down
ko04066	HIF-1 signaling pathway	0.0525997	ENSRNOG00000001414	Serpine1	NA	NA	serpin family E member 1 [Source:RGD Symbol;Acc:3249]	55.409	67.7847	164.683	17.9559	19.5535	21.1919	4.90409	2.29399	up
ko04066	HIF-1 signaling pathway	0.0525997	ENSRNOG00000008176	Nppa	K12334	NA	natriuretic peptide A [Source:RGD Symbol;Acc:3193]	0	0	0	0	0	4.77912	6.27731e-05	-13.9595	down
ko04066	HIF-1 signaling pathway	0.0525997	ENSRNOG00000010208	Timp1	K16451	NA	TIMP metallopeptidase inhibitor 1 [Source:RGD Symbol;Acc:621675]	191.725	124.836	377.443	58.9436	79.8218	69.1842	3.33737	1.73871	up
ko04066	HIF-1 signaling pathway	0.0525997	ENSRNOG00000010278	Il6	K05405	NA	interleukin 6 [Source:RGD Symbol;Acc:2901]	3.16485	2.11915	11.0231	0.105601	0.098662	0.045109	65.3927	6.03106	up
ko04066	HIF-1 signaling pathway	0.0525997	ENSRNOG00000014117	Hmox1	K00510	EC:1.14.14.18	heme oxygenase 1 [Source:RGD Symbol;Acc:2806]	551.077	151.281	396.168	31.9406	70.2869	56.3487	6.92743	2.79232	up
ko04918	Thyroid hormone synthesis	0.0536652	ENSRNOG00000007290	Atp1a2	K01539	EC:7.2.2.13	ATPase Na+/K+ transporting subunit alpha 2 [Source:RGD Symbol;Acc:2168]	1.11361	2.2107	0.439613	6.02731	3.2216	13.5037	0.165429	-2.59572	down
ko04918	Thyroid hormone synthesis	0.0536652	ENSRNOG00000020263	Atp1a3	K01539	EC:7.2.2.13	ATPase Na+/K+ transporting subunit alpha 3 [Source:RGD Symbol;Acc:2169]	1.61757	1.90245	1.13016	0.671541	0.692308	0.956255	2.0043	1.0031	up
ko04918	Thyroid hormone synthesis	0.0536652	ENSRNOG00000058692	Slc26a4	NA	NA	solute carrier family 26 member 4 [Source:RGD Symbol;Acc:3293]	32.2035	26.0783	43.1394	4.03381	8.98354	10.6969	4.27681	2.09653	up
ko04918	Thyroid hormone synthesis	0.0536652	ENSRNOG00000059479	Adcy1	K08041	EC:4.6.1.1	adenylate cyclase 1 [Source:RGD Symbol;Acc:1309318]	0.206208	0.356452	0.124273	1.21653	0.813194	0.51294	0.270163	-1.8881	down
ko04115	p53 signaling pathway	0.0560071	ENSRNOG00000001414	Serpine1	NA	NA	serpin family E member 1 [Source:RGD Symbol;Acc:3249]	55.409	67.7847	164.683	17.9559	19.5535	21.1919	4.90409	2.29399	up
ko04115	p53 signaling pathway	0.0560071	ENSRNOG00000002640	Serpinb5	K10139	NA	serpin family B member 5 [Source:RGD Symbol;Acc:69342]	0	0	0	0	0	0.922211	0.000325305	-11.5859	down
ko04115	p53 signaling pathway	0.0560071	ENSRNOG00000033153	Sfn	K06644	NA	stratifin [Source:RGD Symbol;Acc:1304729]	22.9356	14.9716	33.5055	3.6868	3.29296	10.7613	4.02529	2.00909	up
ko04115	p53 signaling pathway	0.0560071	ENSRNOG00000045829	Thbs1	K16857	NA	thrombospondin 1 [Source:RGD Symbol;Acc:1588455]	69.4641	106.372	164.303	44.915	55.3273	28.7153	2.6376	1.39923	up
ko04971	Gastric acid secretion	0.0560071	ENSRNOG00000007290	Atp1a2	K01539	EC:7.2.2.13	ATPase Na+/K+ transporting subunit alpha 2 [Source:RGD Symbol;Acc:2168]	1.11361	2.2107	0.439613	6.02731	3.2216	13.5037	0.165429	-2.59572	down
ko04971	Gastric acid secretion	0.0560071	ENSRNOG00000020263	Atp1a3	K01539	EC:7.2.2.13	ATPase Na+/K+ transporting subunit alpha 3 [Source:RGD Symbol;Acc:2169]	1.61757	1.90245	1.13016	0.671541	0.692308	0.956255	2.0043	1.0031	up
ko04971	Gastric acid secretion	0.0560071	ENSRNOG00000031955	Calml3	K02183	NA	calmodulin-like 3 [Source:RGD Symbol;Acc:1305499]	8.24095	6.21762	6.22888	7.09436	20.7509	26.911	0.37781	-1.40427	down
ko04971	Gastric acid secretion	0.0560071	ENSRNOG00000059479	Adcy1	K08041	EC:4.6.1.1	adenylate cyclase 1 [Source:RGD Symbol;Acc:1309318]	0.206208	0.356452	0.124273	1.21653	0.813194	0.51294	0.270163	-1.8881	down
ko00450	Selenocompound metabolism	0.0560532	ENSRNOG00000011068	Papss2	K13811	2.7.1.25;EC:2.7.7.4	3'-phosphoadenosine 5'-phosphosulfate synthase 2 [Source:RGD Symbol;Acc:1307012]	1.26168	1.73621	0.852359	2.5901	1.95362	4.37942	0.43149	-1.2126	down
ko00450	Selenocompound metabolism	0.0560532	ENSRNOG00000011250	Inmt	K00562	2.1.1.96;EC:2.1.1.49	indolethylamine N-methyltransferase [Source:RGD Symbol;Acc:1597087]	3.66093	5.49999	4.98651	16.9182	9.65093	12.8462	0.358932	-1.47822	down
ko04371	Apelin signaling pathway	0.060138	ENSRNOG00000001414	Serpine1	NA	NA	serpin family E member 1 [Source:RGD Symbol;Acc:3249]	55.409	67.7847	164.683	17.9559	19.5535	21.1919	4.90409	2.29399	up
ko04371	Apelin signaling pathway	0.060138	ENSRNOG00000004473	Ppargc1a	K07202	NA	PPARG coactivator 1 alpha [Source:RGD Symbol;Acc:620925]	0.699099	0.733841	0.380414	1.53806	1.6784	1.50382	0.384163	-1.38021	down
ko04371	Apelin signaling pathway	0.060138	ENSRNOG00000017060	Ryr2	K04962	NA	ryanodine receptor 2 [Source:RGD Symbol;Acc:620314]	0.186399	0.211602	0.108926	0.285075	0.300051	1.47817	0.245687	-2.0251	down
ko04371	Apelin signaling pathway	0.060138	ENSRNOG00000019422	Egr1	K09203	NA	early growth response 1 [Source:RGD Symbol;Acc:2544]	28.8778	81.6766	49.115	5.6807	12.1778	9.44428	5.8481	2.54797	up
ko04371	Apelin signaling pathway	0.060138	ENSRNOG00000031955	Calml3	K02183	NA	calmodulin-like 3 [Source:RGD Symbol;Acc:1305499]	8.24095	6.21762	6.22888	7.09436	20.7509	26.911	0.37781	-1.40427	down
ko04371	Apelin signaling pathway	0.060138	ENSRNOG00000059479	Adcy1	K08041	EC:4.6.1.1	adenylate cyclase 1 [Source:RGD Symbol;Acc:1309318]	0.206208	0.356452	0.124273	1.21653	0.813194	0.51294	0.270163	-1.8881	down
ko04970	Salivary secretion	0.0608541	ENSRNOG00000007290	Atp1a2	K01539	EC:7.2.2.13	ATPase Na+/K+ transporting subunit alpha 2 [Source:RGD Symbol;Acc:2168]	1.11361	2.2107	0.439613	6.02731	3.2216	13.5037	0.165429	-2.59572	down
ko04970	Salivary secretion	0.0608541	ENSRNOG00000020263	Atp1a3	K01539	EC:7.2.2.13	ATPase Na+/K+ transporting subunit alpha 3 [Source:RGD Symbol;Acc:2169]	1.61757	1.90245	1.13016	0.671541	0.692308	0.956255	2.0043	1.0031	up
ko04970	Salivary secretion	0.0608541	ENSRNOG00000031955	Calml3	K02183	NA	calmodulin-like 3 [Source:RGD Symbol;Acc:1305499]	8.24095	6.21762	6.22888	7.09436	20.7509	26.911	0.37781	-1.40427	down
ko04970	Salivary secretion	0.0608541	ENSRNOG00000059479	Adcy1	K08041	EC:4.6.1.1	adenylate cyclase 1 [Source:RGD Symbol;Acc:1309318]	0.206208	0.356452	0.124273	1.21653	0.813194	0.51294	0.270163	-1.8881	down
ko00532	Glycosaminoglycan biosynthesis - chondroitin sulfate / dermatan sulfate	0.0614714	ENSRNOG00000000572	Chst3	K01020	EC:2.8.2.17	carbohydrate sulfotransferase 3 [Source:RGD Symbol;Acc:620355]	1.49077	2.27646	1.31024	4.70228	4.76565	2.85126	0.412159	-1.27873	down
ko00532	Glycosaminoglycan biosynthesis - chondroitin sulfate / dermatan sulfate	0.0614714	ENSRNOG00000025930	Chst13	K07779	EC:2.8.2.5	carbohydrate sulfotransferase 13 [Source:RGD Symbol;Acc:1562825]	0.338249	0.526967	0.373033	4.52184	1.85475	0.587228	0.177812	-2.49158	down
ko00380	Tryptophan metabolism	0.0663597	ENSRNOG00000011250	Inmt	K00562	2.1.1.96;EC:2.1.1.49	indolethylamine N-methyltransferase [Source:RGD Symbol;Acc:1597087]	3.66093	5.49999	4.98651	16.9182	9.65093	12.8462	0.358932	-1.47822	down
ko00380	Tryptophan metabolism	0.0663597	ENSRNOG00000019500	Cyp1a1	K07408	EC:1.14.14.1	cytochrome P450, family 1, subfamily a, polypeptide 1 [Source:RGD Symbol;Acc:2458]	3.79747	8.76837	3.6107	28.2685	25.6761	8.90865	0.25737	-1.95808	down
ko00380	Tryptophan metabolism	0.0663597	ENSRNOG00000062125	Aox3	K00157	EC:1.2.3.1	aldehyde oxidase 3 [Source:RGD Symbol;Acc:1359328]	0.87407	1.02473	0.56828	1.87058	1.06784	3.69308	0.372024	-1.42653	down
ko04964	Proximal tubule bicarbonate reclamation	0.0670599	ENSRNOG00000007290	Atp1a2	K01539	EC:7.2.2.13	ATPase Na+/K+ transporting subunit alpha 2 [Source:RGD Symbol;Acc:2168]	1.11361	2.2107	0.439613	6.02731	3.2216	13.5037	0.165429	-2.59572	down
ko04964	Proximal tubule bicarbonate reclamation	0.0670599	ENSRNOG00000020263	Atp1a3	K01539	EC:7.2.2.13	ATPase Na+/K+ transporting subunit alpha 3 [Source:RGD Symbol;Acc:2169]	1.61757	1.90245	1.13016	0.671541	0.692308	0.956255	2.0043	1.0031	up
ko04625	C-type lectin receptor signaling pathway	0.0686501	ENSRNOG00000000640	Egr2	K12496	NA	early growth response 2 [Source:RGD Symbol;Acc:621608]	3.15739	6.1992	6.47142	1.3654	1.96587	0.959568	3.68879	1.88315	up
ko04625	C-type lectin receptor signaling pathway	0.0686501	ENSRNOG00000004649	Il1b	K04519	NA	interleukin 1 beta [Source:RGD Symbol;Acc:2891]	17.0922	15.7097	15.266	6.22867	5.3594	4.98742	2.89994	1.53602	up
ko04625	C-type lectin receptor signaling pathway	0.0686501	ENSRNOG00000010278	Il6	K05405	NA	interleukin 6 [Source:RGD Symbol;Acc:2901]	3.16485	2.11915	11.0231	0.105601	0.098662	0.045109	65.3927	6.03106	up
ko04625	C-type lectin receptor signaling pathway	0.0686501	ENSRNOG00000031955	Calml3	K02183	NA	calmodulin-like 3 [Source:RGD Symbol;Acc:1305499]	8.24095	6.21762	6.22888	7.09436	20.7509	26.911	0.37781	-1.40427	down
ko04625	C-type lectin receptor signaling pathway	0.0686501	ENSRNOG00000043416	Bcl3	K09258	NA	BCL3, transcription coactivator [Source:RGD Symbol;Acc:1589465]	16.3829	10.3304	23.1764	5.68874	5.93954	6.44326	2.76067	1.46502	up
ko00900	Terpenoid backbone biosynthesis	0.0728099	ENSRNOG00000016690	Idi1	K01823	EC:5.3.3.2	isopentenyl-diphosphate delta isomerase 1 [Source:RGD Symbol;Acc:621835]	18.2476	18.1584	25.9308	7.61291	11.1251	11.004	2.09592	1.06758	up
ko00900	Terpenoid backbone biosynthesis	0.0728099	ENSRNOG00000019120	Hmgcs2	K01641	EC:2.3.3.10	3-hydroxy-3-methylglutaryl-CoA synthase 2 [Source:RGD Symbol;Acc:2804]	5.71888	6.61347	2.53401	17.9587	10.1034	13.6071	0.356771	-1.48693	down
ko05418	Fluid shear stress and atherosclerosis	0.0767409	ENSRNOG00000002723	Sele	K06494	NA	selectin E [Source:RGD Symbol;Acc:3654]	2.98187	1.19921	3.6168	0.148222	0.414433	0.461137	7.61667	2.92916	up
ko05418	Fluid shear stress and atherosclerosis	0.0767409	ENSRNOG00000004649	Il1b	K04519	NA	interleukin 1 beta [Source:RGD Symbol;Acc:2891]	17.0922	15.7097	15.266	6.22867	5.3594	4.98742	2.89994	1.53602	up
ko05418	Fluid shear stress and atherosclerosis	0.0767409	ENSRNOG00000007159	Ccl2	K14624	NA	C-C motif chemokine ligand 2 [Source:RGD Symbol;Acc:3645]	37.7066	18.9936	41.8423	1.13671	3.71253	3.7896	11.4069	3.51183	up
ko05418	Fluid shear stress and atherosclerosis	0.0767409	ENSRNOG00000014117	Hmox1	K00510	EC:1.14.14.18	heme oxygenase 1 [Source:RGD Symbol;Acc:2806]	551.077	151.281	396.168	31.9406	70.2869	56.3487	6.92743	2.79232	up
ko05418	Fluid shear stress and atherosclerosis	0.0767409	ENSRNOG00000029768	Ccl12	K14624	NA	chemokine (C-C motif) ligand 12 [Source:RGD Symbol;Acc:1309255]	6.0007	2.47451	2.57848	0.194217	0.89901	0.367082	7.56941	2.92018	up
ko05418	Fluid shear stress and atherosclerosis	0.0767409	ENSRNOG00000031955	Calml3	K02183	NA	calmodulin-like 3 [Source:RGD Symbol;Acc:1305499]	8.24095	6.21762	6.22888	7.09436	20.7509	26.911	0.37781	-1.40427	down
ko00290	Valine, leucine and isoleucine biosynthesis	0.0789253	ENSRNOG00000015514	Bcat1	NA	NA	branched chain amino acid transaminase 1 [Source:RGD Symbol;Acc:2195]	12.5295	6.97787	11.6416	3.05441	3.50371	6.92907	2.30952	1.2076	up
ko04623	Cytosolic DNA-sensing pathway	0.0808884	ENSRNOG00000004649	Il1b	K04519	NA	interleukin 1 beta [Source:RGD Symbol;Acc:2891]	17.0922	15.7097	15.266	6.22867	5.3594	4.98742	2.89994	1.53602	up
ko04623	Cytosolic DNA-sensing pathway	0.0808884	ENSRNOG00000010278	Il6	K05405	NA	interleukin 6 [Source:RGD Symbol;Acc:2901]	3.16485	2.11915	11.0231	0.105601	0.098662	0.045109	65.3927	6.03106	up
ko04623	Cytosolic DNA-sensing pathway	0.0808884	ENSRNOG00000011406	Ccl4	K12964	NA	C-C motif chemokine ligand 4 [Source:RGD Symbol;Acc:620441]	11.707	5.81372	6.12502	3.35851	3.36341	2.87314	2.46437	1.30122	up
ko00790	Folate biosynthesis	0.0847592	ENSRNOG00000011039	Gch1	K01495	EC:3.5.4.16	GTP cyclohydrolase 1 [Source:RGD Symbol;Acc:61992]	24.2456	21.4661	37.719	10.8419	15.8192	13.7037	2.06692	1.04748	up
ko00790	Folate biosynthesis	0.0847592	ENSRNOG00000013521	Dhfr	K00287	EC:1.5.1.3	dihydrofolate reductase [Source:RGD Symbol;Acc:2500]	4.22122	4.13326	5.03549	1.90962	1.4482	2.93528	2.12772	1.08931	up
ko00280	Valine, leucine and isoleucine degradation	0.0886266	ENSRNOG00000015514	Bcat1	NA	NA	branched chain amino acid transaminase 1 [Source:RGD Symbol;Acc:2195]	12.5295	6.97787	11.6416	3.05441	3.50371	6.92907	2.30952	1.2076	up
ko00280	Valine, leucine and isoleucine degradation	0.0886266	ENSRNOG00000019120	Hmgcs2	K01641	EC:2.3.3.10	3-hydroxy-3-methylglutaryl-CoA synthase 2 [Source:RGD Symbol;Acc:2804]	5.71888	6.61347	2.53401	17.9587	10.1034	13.6071	0.356771	-1.48693	down
ko00280	Valine, leucine and isoleucine degradation	0.0886266	ENSRNOG00000062125	Aox3	K00157	EC:1.2.3.1	aldehyde oxidase 3 [Source:RGD Symbol;Acc:1359328]	0.87407	1.02473	0.56828	1.87058	1.06784	3.69308	0.372024	-1.42653	down
ko04380	Osteoclast differentiation	0.105222	ENSRNOG00000002946	Socs3	K04696	NA	suppressor of cytokine signaling 3 [Source:RGD Symbol;Acc:621087]	50.4008	65.1614	87.6908	40.5991	23.2455	16.4051	2.53276	1.34071	up
ko04380	Osteoclast differentiation	0.105222	ENSRNOG00000004649	Il1b	K04519	NA	interleukin 1 beta [Source:RGD Symbol;Acc:2891]	17.0922	15.7097	15.266	6.22867	5.3594	4.98742	2.89994	1.53602	up
ko04380	Osteoclast differentiation	0.105222	ENSRNOG00000027811	Lilrb4	K06512	NA	leukocyte immunoglobulin like receptor B4 [Source:RGD Symbol;Acc:1359090]	27.4274	26.3076	19.6644	9.24654	7.55585	18.7994	2.06168	1.04382	up
ko04380	Osteoclast differentiation	0.105222	ENSRNOG00000042838	Junb	K09028	NA	JunB proto-oncogene, AP-1 transcription factor subunit [Source:RGD Symbol;Acc:2944]	78.6986	148.666	117.666	59.4441	49.5459	34.9588	2.39689	1.26117	up
ko04380	Osteoclast differentiation	0.105222	ENSRNOG00000046667	Fosb	K09029	NA	FosB proto-oncogene, AP-1 transcription factor subunit [Source:RGD Symbol;Acc:1308198]	4.40301	29.0803	28.1312	2.28038	1.38324	1.99461	10.8894	3.44485	up
ko04620	Toll-like receptor signaling pathway	0.107135	ENSRNOG00000004649	Il1b	K04519	NA	interleukin 1 beta [Source:RGD Symbol;Acc:2891]	17.0922	15.7097	15.266	6.22867	5.3594	4.98742	2.89994	1.53602	up
ko04620	Toll-like receptor signaling pathway	0.107135	ENSRNOG00000010278	Il6	K05405	NA	interleukin 6 [Source:RGD Symbol;Acc:2901]	3.16485	2.11915	11.0231	0.105601	0.098662	0.045109	65.3927	6.03106	up
ko04620	Toll-like receptor signaling pathway	0.107135	ENSRNOG00000011406	Ccl4	K12964	NA	C-C motif chemokine ligand 4 [Source:RGD Symbol;Acc:620441]	11.707	5.81372	6.12502	3.35851	3.36341	2.87314	2.46437	1.30122	up
ko04620	Toll-like receptor signaling pathway	0.107135	ENSRNOG00000022067	Tlr5	K10168	NA	toll-like receptor 5 [Source:RGD Symbol;Acc:631351]	1.22779	1.25646	1.08737	3.79088	2.48157	3.94515	0.349555	-1.51641	down
ko00860	Porphyrin and chlorophyll metabolism	0.110227	ENSRNOG00000000167	Alas2	K00643	EC:2.3.1.37	5'-aminolevulinate synthase 2 [Source:RGD Symbol;Acc:2084]	6.09555	7.97318	4.91833	9.86952	17.5757	19.2731	0.406416	-1.29897	down
ko00860	Porphyrin and chlorophyll metabolism	0.110227	ENSRNOG00000014117	Hmox1	K00510	EC:1.14.14.18	heme oxygenase 1 [Source:RGD Symbol;Acc:2806]	551.077	151.281	396.168	31.9406	70.2869	56.3487	6.92743	2.79232	up
ko04510	Focal adhesion	0.110562	ENSRNOG00000006569	Itgb8	K06591	NA	integrin subunit beta 8 [Source:RGD Symbol;Acc:1311374]	2.69064	1.81036	3.42008	0.970632	0.984076	0.573387	3.13322	1.64765	up
ko04510	Focal adhesion	0.110562	ENSRNOG00000010529	Thbs2	K04659	NA	thrombospondin 2 [Source:RGD Symbol;Acc:1310979]	16.9175	9.7328	15.9974	2.57939	6.01878	6.82916	2.76443	1.46698	up
ko04510	Focal adhesion	0.110562	ENSRNOG00000014409	Myl7	K12754	NA	myosin light chain 7 [Source:RGD Symbol;Acc:1308262]	0.119219	0.0167495	0.0100427	0.0271121	0.0105536	57.8738	0.00252129	-8.63162	down
ko04510	Focal adhesion	0.110562	ENSRNOG00000045829	Thbs1	K16857	NA	thrombospondin 1 [Source:RGD Symbol;Acc:1588455]	69.4641	106.372	164.303	44.915	55.3273	28.7153	2.6376	1.39923	up
ko04510	Focal adhesion	0.110562	ENSRNOG00000056129	LOC102554659	K06247	NA	laminin subunit gamma-3-like [Source:RGD Symbol;Acc:7518353]	0.143205	0.092271	0.140703	0.90736	0.821992	0.418494	0.175142	-2.5134	down
ko04510	Focal adhesion	0.110562	ENSRNOG00000058645	Tnc	K06252	NA	tenascin C [Source:RGD Symbol;Acc:621057]	32.8819	24.6221	38.6851	10.8562	17.6057	12.6766	2.33817	1.22538	up
ko04510	Focal adhesion	0.110562	ENSRNOG00000059507	Lamc3	K06247	NA	laminin subunit gamma 3 [Source:RGD Symbol;Acc:1309399]	0.642198	0.669721	0.48091	3.66613	1.70261	2.05931	0.241359	-2.05075	down
ko04024	cAMP signaling pathway	0.112728	ENSRNOG00000007290	Atp1a2	K01539	EC:7.2.2.13	ATPase Na+/K+ transporting subunit alpha 2 [Source:RGD Symbol;Acc:2168]	1.11361	2.2107	0.439613	6.02731	3.2216	13.5037	0.165429	-2.59572	down
ko04024	cAMP signaling pathway	0.112728	ENSRNOG00000008176	Nppa	K12334	NA	natriuretic peptide A [Source:RGD Symbol;Acc:3193]	0	0	0	0	0	4.77912	6.27731e-05	-13.9595	down
ko04024	cAMP signaling pathway	0.112728	ENSRNOG00000017060	Ryr2	K04962	NA	ryanodine receptor 2 [Source:RGD Symbol;Acc:620314]	0.186399	0.211602	0.108926	0.285075	0.300051	1.47817	0.245687	-2.0251	down
ko04024	cAMP signaling pathway	0.112728	ENSRNOG00000020263	Atp1a3	K01539	EC:7.2.2.13	ATPase Na+/K+ transporting subunit alpha 3 [Source:RGD Symbol;Acc:2169]	1.61757	1.90245	1.13016	0.671541	0.692308	0.956255	2.0043	1.0031	up
ko04024	cAMP signaling pathway	0.112728	ENSRNOG00000028404	Ppp1r1b	K15494	NA	protein phosphatase 1, regulatory (inhibitor) subunit 1B [Source:RGD Symbol;Acc:621859]	7.76903	6.02664	5.6708	22.4231	7.67647	15.2862	0.428911	-1.22125	down
ko04024	cAMP signaling pathway	0.112728	ENSRNOG00000031955	Calml3	K02183	NA	calmodulin-like 3 [Source:RGD Symbol;Acc:1305499]	8.24095	6.21762	6.22888	7.09436	20.7509	26.911	0.37781	-1.40427	down
ko04024	cAMP signaling pathway	0.112728	ENSRNOG00000059479	Adcy1	K08041	EC:4.6.1.1	adenylate cyclase 1 [Source:RGD Symbol;Acc:1309318]	0.206208	0.356452	0.124273	1.21653	0.813194	0.51294	0.270163	-1.8881	down
ko00140	Steroid hormone biosynthesis	0.117977	ENSRNOG00000012458	Cyp2e1	K07415	EC:1.14.13.-	cytochrome P450, family 2, subfamily e, polypeptide 1 [Source:RGD Symbol;Acc:2475]	1.59029	2.0422	0.503894	5.70974	4.74285	4.83838	0.270512	-1.88624	down
ko00140	Steroid hormone biosynthesis	0.117977	ENSRNOG00000019500	Cyp1a1	K07408	EC:1.14.14.1	cytochrome P450, family 1, subfamily a, polypeptide 1 [Source:RGD Symbol;Acc:2458]	3.79747	8.76837	3.6107	28.2685	25.6761	8.90865	0.25737	-1.95808	down
ko00140	Steroid hormone biosynthesis	0.117977	ENSRNOG00000032261	Cyp2d4	K07414	EC:1.14.14.1	cytochrome P450, family 2, subfamily d, polypeptide 4 [Source:RGD Symbol;Acc:620640]	3.90219	4.53709	2.88962	9.25606	7.48095	6.29301	0.491919	-1.02351	down
ko05321	Inflammatory bowel disease (IBD)	0.117977	ENSRNOG00000004649	Il1b	K04519	NA	interleukin 1 beta [Source:RGD Symbol;Acc:2891]	17.0922	15.7097	15.266	6.22867	5.3594	4.98742	2.89994	1.53602	up
ko05321	Inflammatory bowel disease (IBD)	0.117977	ENSRNOG00000010278	Il6	K05405	NA	interleukin 6 [Source:RGD Symbol;Acc:2901]	3.16485	2.11915	11.0231	0.105601	0.098662	0.045109	65.3927	6.03106	up
ko05321	Inflammatory bowel disease (IBD)	0.117977	ENSRNOG00000022067	Tlr5	K10168	NA	toll-like receptor 5 [Source:RGD Symbol;Acc:631351]	1.22779	1.25646	1.08737	3.79088	2.48157	3.94515	0.349555	-1.51641	down
ko04145	Phagosome	0.127092	ENSRNOG00000010529	Thbs2	K04659	NA	thrombospondin 2 [Source:RGD Symbol;Acc:1310979]	16.9175	9.7328	15.9974	2.57939	6.01878	6.82916	2.76443	1.46698	up
ko04145	Phagosome	0.127092	ENSRNOG00000012779	Msr1	K06558	NA	macrophage scavenger receptor 1 [Source:RGD Symbol;Acc:1564316]	12.1959	9.51486	9.14382	4.2104	4.34232	6.3628	2.06862	1.04867	up
ko04145	Phagosome	0.127092	ENSRNOG00000018371	Tubb6	K07375	NA	tubulin, beta 6 class V [Source:RGD Symbol;Acc:1305887]	51.3781	46.6999	62.9911	19.1659	30.0293	30.0424	2.03274	1.02342	up
ko04145	Phagosome	0.127092	ENSRNOG00000045829	Thbs1	K16857	NA	thrombospondin 1 [Source:RGD Symbol;Acc:1588455]	69.4641	106.372	164.303	44.915	55.3273	28.7153	2.6376	1.39923	up
ko04145	Phagosome	0.127092	ENSRNOG00000048169	Tuba8	K07374	NA	tubulin, alpha 8 [Source:RGD Symbol;Acc:1566041]	3.55351	3.77764	3.98149	1.19674	1.13894	1.48065	2.96428	1.56768	up
ko04145	Phagosome	0.127092	ENSRNOG00000049303	Marco	K13884	NA	macrophage receptor with collagenous structure [Source:RGD Symbol;Acc:1589662]	0.632275	0.603204	0.631253	0	0	0	6222.44	12.6033	up
ko04270	Vascular smooth muscle contraction	0.134005	ENSRNOG00000004400	Avpr1a	K04226	NA	arginine vasopressin receptor 1A [Source:RGD Symbol;Acc:2185]	0.884247	0.991065	0.583946	1.63749	2.34024	1.80556	0.425235	-1.23367	down
ko04270	Vascular smooth muscle contraction	0.134005	ENSRNOG00000008176	Nppa	K12334	NA	natriuretic peptide A [Source:RGD Symbol;Acc:3193]	0	0	0	0	0	4.77912	6.27731e-05	-13.9595	down
ko04270	Vascular smooth muscle contraction	0.134005	ENSRNOG00000016945	Pla2g2a	NA	NA	phospholipase A2 group IIA [Source:RGD Symbol;Acc:620857]	430.776	142.041	305.208	31.8882	19.843	49.1573	8.70292	3.1215	up
ko04270	Vascular smooth muscle contraction	0.134005	ENSRNOG00000031955	Calml3	K02183	NA	calmodulin-like 3 [Source:RGD Symbol;Acc:1305499]	8.24095	6.21762	6.22888	7.09436	20.7509	26.911	0.37781	-1.40427	down
ko04270	Vascular smooth muscle contraction	0.134005	ENSRNOG00000059479	Adcy1	K08041	EC:4.6.1.1	adenylate cyclase 1 [Source:RGD Symbol;Acc:1309318]	0.206208	0.356452	0.124273	1.21653	0.813194	0.51294	0.270163	-1.8881	down
ko05031	Amphetamine addiction	0.145607	ENSRNOG00000028404	Ppp1r1b	K15494	NA	protein phosphatase 1, regulatory (inhibitor) subunit 1B [Source:RGD Symbol;Acc:621859]	7.76903	6.02664	5.6708	22.4231	7.67647	15.2862	0.428911	-1.22125	down
ko05031	Amphetamine addiction	0.145607	ENSRNOG00000031955	Calml3	K02183	NA	calmodulin-like 3 [Source:RGD Symbol;Acc:1305499]	8.24095	6.21762	6.22888	7.09436	20.7509	26.911	0.37781	-1.40427	down
ko05031	Amphetamine addiction	0.145607	ENSRNOG00000046667	Fosb	K09029	NA	FosB proto-oncogene, AP-1 transcription factor subunit [Source:RGD Symbol;Acc:1308198]	4.40301	29.0803	28.1312	2.28038	1.38324	1.99461	10.8894	3.44485	up
ko04976	Bile secretion	0.165095	ENSRNOG00000007290	Atp1a2	K01539	EC:7.2.2.13	ATPase Na+/K+ transporting subunit alpha 2 [Source:RGD Symbol;Acc:2168]	1.11361	2.2107	0.439613	6.02731	3.2216	13.5037	0.165429	-2.59572	down
ko04976	Bile secretion	0.165095	ENSRNOG00000020263	Atp1a3	K01539	EC:7.2.2.13	ATPase Na+/K+ transporting subunit alpha 3 [Source:RGD Symbol;Acc:2169]	1.61757	1.90245	1.13016	0.671541	0.692308	0.956255	2.0043	1.0031	up
ko04976	Bile secretion	0.165095	ENSRNOG00000059479	Adcy1	K08041	EC:4.6.1.1	adenylate cyclase 1 [Source:RGD Symbol;Acc:1309318]	0.206208	0.356452	0.124273	1.21653	0.813194	0.51294	0.270163	-1.8881	down
ko00430	Taurine and hypotaurine metabolism	0.168935	ENSRNOG00000000158	Cdo1	K00456	EC:1.13.11.20	cysteine dioxygenase type 1 [Source:RGD Symbol;Acc:69262]	13.6117	16.2309	8.62663	48.0212	33.1986	69.6373	0.255005	-1.9714	down
ko00072	Synthesis and degradation of ketone bodies	0.168935	ENSRNOG00000019120	Hmgcs2	K01641	EC:2.3.3.10	3-hydroxy-3-methylglutaryl-CoA synthase 2 [Source:RGD Symbol;Acc:2804]	5.71888	6.61347	2.53401	17.9587	10.1034	13.6071	0.356771	-1.48693	down
ko00590	Arachidonic acid metabolism	0.170084	ENSRNOG00000012458	Cyp2e1	K07415	EC:1.14.13.-	cytochrome P450, family 2, subfamily e, polypeptide 1 [Source:RGD Symbol;Acc:2475]	1.59029	2.0422	0.503894	5.70974	4.74285	4.83838	0.270512	-1.88624	down
ko00590	Arachidonic acid metabolism	0.170084	ENSRNOG00000016945	Pla2g2a	NA	NA	phospholipase A2 group IIA [Source:RGD Symbol;Acc:620857]	430.776	142.041	305.208	31.8882	19.843	49.1573	8.70292	3.1215	up
ko00590	Arachidonic acid metabolism	0.170084	ENSRNOG00000019183	Alox15	K00460	EC:1.13.11.33	arachidonate 15-lipoxygenase [Source:RGD Symbol;Acc:70493]	3.17012	1.75927	2.65063	3.59856	4.73835	17.0034	0.299129	-1.74116	down
ko04920	Adipocytokine signaling pathway	0.170084	ENSRNOG00000002946	Socs3	K04696	NA	suppressor of cytokine signaling 3 [Source:RGD Symbol;Acc:621087]	50.4008	65.1614	87.6908	40.5991	23.2455	16.4051	2.53276	1.34071	up
ko04920	Adipocytokine signaling pathway	0.170084	ENSRNOG00000004473	Ppargc1a	K07202	NA	PPARG coactivator 1 alpha [Source:RGD Symbol;Acc:620925]	0.699099	0.733841	0.380414	1.53806	1.6784	1.50382	0.384163	-1.38021	down
ko04920	Adipocytokine signaling pathway	0.170084	ENSRNOG00000004537	Rxrg	K08526	NA	retinoid X receptor gamma [Source:RGD Symbol;Acc:620046]	0.784535	1.26834	0.531943	2.96272	1.86653	2.04611	0.375954	-1.41137	down
ko04973	Carbohydrate digestion and absorption	0.173093	ENSRNOG00000007290	Atp1a2	K01539	EC:7.2.2.13	ATPase Na+/K+ transporting subunit alpha 2 [Source:RGD Symbol;Acc:2168]	1.11361	2.2107	0.439613	6.02731	3.2216	13.5037	0.165429	-2.59572	down
ko04973	Carbohydrate digestion and absorption	0.173093	ENSRNOG00000020263	Atp1a3	K01539	EC:7.2.2.13	ATPase Na+/K+ transporting subunit alpha 3 [Source:RGD Symbol;Acc:2169]	1.61757	1.90245	1.13016	0.671541	0.692308	0.956255	2.0043	1.0031	up
ko04750	Inflammatory mediator regulation of TRP channels	0.177106	ENSRNOG00000004649	Il1b	K04519	NA	interleukin 1 beta [Source:RGD Symbol;Acc:2891]	17.0922	15.7097	15.266	6.22867	5.3594	4.98742	2.89994	1.53602	up
ko04750	Inflammatory mediator regulation of TRP channels	0.177106	ENSRNOG00000019985	Asic4	K04831	NA	acid sensing ion channel subunit family member 4 [Source:RGD Symbol;Acc:621068]	0.519072	0.259738	0.306778	0.063806	0.056224	0.087246	5.2374	2.38885	up
ko04750	Inflammatory mediator regulation of TRP channels	0.177106	ENSRNOG00000031955	Calml3	K02183	NA	calmodulin-like 3 [Source:RGD Symbol;Acc:1305499]	8.24095	6.21762	6.22888	7.09436	20.7509	26.911	0.37781	-1.40427	down
ko04750	Inflammatory mediator regulation of TRP channels	0.177106	ENSRNOG00000059479	Adcy1	K08041	EC:4.6.1.1	adenylate cyclase 1 [Source:RGD Symbol;Acc:1309318]	0.206208	0.356452	0.124273	1.21653	0.813194	0.51294	0.270163	-1.8881	down
ko05412	Arrhythmogenic right ventricular cardiomyopathy (ARVC)	0.180192	ENSRNOG00000002372	Sgcd	K12563	NA	sarcoglycan, delta [Source:RGD Symbol;Acc:1306638]	0.93466	1.49454	1.00184	2.76866	3.11875	2.25635	0.421309	-1.24705	down
ko05412	Arrhythmogenic right ventricular cardiomyopathy (ARVC)	0.180192	ENSRNOG00000006569	Itgb8	K06591	NA	integrin subunit beta 8 [Source:RGD Symbol;Acc:1311374]	2.69064	1.81036	3.42008	0.970632	0.984076	0.573387	3.13322	1.64765	up
ko05412	Arrhythmogenic right ventricular cardiomyopathy (ARVC)	0.180192	ENSRNOG00000017060	Ryr2	K04962	NA	ryanodine receptor 2 [Source:RGD Symbol;Acc:620314]	0.186399	0.211602	0.108926	0.285075	0.300051	1.47817	0.245687	-2.0251	down
ko00920	Sulfur metabolism	0.18586	ENSRNOG00000011068	Papss2	K13811	2.7.1.25;EC:2.7.7.4	3'-phosphoadenosine 5'-phosphosulfate synthase 2 [Source:RGD Symbol;Acc:1307012]	1.26168	1.73621	0.852359	2.5901	1.95362	4.37942	0.43149	-1.2126	down
ko00750	Vitamin B6 metabolism	0.18586	ENSRNOG00000062125	Aox3	K00157	EC:1.2.3.1	aldehyde oxidase 3 [Source:RGD Symbol;Acc:1359328]	0.87407	1.02473	0.56828	1.87058	1.06784	3.69308	0.372024	-1.42653	down
ko05163	Human cytomegalovirus infection	0.195976	ENSRNOG00000004649	Il1b	K04519	NA	interleukin 1 beta [Source:RGD Symbol;Acc:2891]	17.0922	15.7097	15.266	6.22867	5.3594	4.98742	2.89994	1.53602	up
ko05163	Human cytomegalovirus infection	0.195976	ENSRNOG00000007159	Ccl2	K14624	NA	C-C motif chemokine ligand 2 [Source:RGD Symbol;Acc:3645]	37.7066	18.9936	41.8423	1.13671	3.71253	3.7896	11.4069	3.51183	up
ko05163	Human cytomegalovirus infection	0.195976	ENSRNOG00000010278	Il6	K05405	NA	interleukin 6 [Source:RGD Symbol;Acc:2901]	3.16485	2.11915	11.0231	0.105601	0.098662	0.045109	65.3927	6.03106	up
ko05163	Human cytomegalovirus infection	0.195976	ENSRNOG00000011406	Ccl4	K12964	NA	C-C motif chemokine ligand 4 [Source:RGD Symbol;Acc:620441]	11.707	5.81372	6.12502	3.35851	3.36341	2.87314	2.46437	1.30122	up
ko05163	Human cytomegalovirus infection	0.195976	ENSRNOG00000029768	Ccl12	K14624	NA	chemokine (C-C motif) ligand 12 [Source:RGD Symbol;Acc:1309255]	6.0007	2.47451	2.57848	0.194217	0.89901	0.367082	7.56941	2.92018	up
ko05163	Human cytomegalovirus infection	0.195976	ENSRNOG00000031955	Calml3	K02183	NA	calmodulin-like 3 [Source:RGD Symbol;Acc:1305499]	8.24095	6.21762	6.22888	7.09436	20.7509	26.911	0.37781	-1.40427	down
ko05163	Human cytomegalovirus infection	0.195976	ENSRNOG00000059479	Adcy1	K08041	EC:4.6.1.1	adenylate cyclase 1 [Source:RGD Symbol;Acc:1309318]	0.206208	0.356452	0.124273	1.21653	0.813194	0.51294	0.270163	-1.8881	down
ko04932	Non-alcoholic fatty liver disease (NAFLD)	0.200543	ENSRNOG00000002946	Socs3	K04696	NA	suppressor of cytokine signaling 3 [Source:RGD Symbol;Acc:621087]	50.4008	65.1614	87.6908	40.5991	23.2455	16.4051	2.53276	1.34071	up
ko04932	Non-alcoholic fatty liver disease (NAFLD)	0.200543	ENSRNOG00000004649	Il1b	K04519	NA	interleukin 1 beta [Source:RGD Symbol;Acc:2891]	17.0922	15.7097	15.266	6.22867	5.3594	4.98742	2.89994	1.53602	up
ko04932	Non-alcoholic fatty liver disease (NAFLD)	0.200543	ENSRNOG00000010278	Il6	K05405	NA	interleukin 6 [Source:RGD Symbol;Acc:2901]	3.16485	2.11915	11.0231	0.105601	0.098662	0.045109	65.3927	6.03106	up
ko04932	Non-alcoholic fatty liver disease (NAFLD)	0.200543	ENSRNOG00000012458	Cyp2e1	K07415	EC:1.14.13.-	cytochrome P450, family 2, subfamily e, polypeptide 1 [Source:RGD Symbol;Acc:2475]	1.59029	2.0422	0.503894	5.70974	4.74285	4.83838	0.270512	-1.88624	down
ko04932	Non-alcoholic fatty liver disease (NAFLD)	0.200543	ENSRNOG00000014656	Cox8b	K02273	NA	cytochrome c oxidase, subunit VIIIb [Source:RGD Symbol;Acc:2386]	0.277625	0.746188	0	1.76709	3.81586	10.2263	0.0647605	-3.94874	down
ko03320	PPAR signaling pathway	0.200872	ENSRNOG00000004537	Rxrg	K08526	NA	retinoid X receptor gamma [Source:RGD Symbol;Acc:620046]	0.784535	1.26834	0.531943	2.96272	1.86653	2.04611	0.375954	-1.41137	down
ko03320	PPAR signaling pathway	0.200872	ENSRNOG00000019120	Hmgcs2	K01641	EC:2.3.3.10	3-hydroxy-3-methylglutaryl-CoA synthase 2 [Source:RGD Symbol;Acc:2804]	5.71888	6.61347	2.53401	17.9587	10.1034	13.6071	0.356771	-1.48693	down
ko03320	PPAR signaling pathway	0.200872	ENSRNOG00000047046	Plin4	K20254	NA	perilipin 4 [Source:RGD Symbol;Acc:1590867]	0.668037	0.738179	0.439185	1.12006	1.01983	5.26562	0.249193	-2.00466	down
ko04921	Oxytocin signaling pathway	0.204136	ENSRNOG00000008176	Nppa	K12334	NA	natriuretic peptide A [Source:RGD Symbol;Acc:3193]	0	0	0	0	0	4.77912	6.27731e-05	-13.9595	down
ko04921	Oxytocin signaling pathway	0.204136	ENSRNOG00000013869	Kcnj4	K04998	NA	potassium voltage-gated channel subfamily J member 4 [Source:RGD Symbol;Acc:621436]	0.672457	0.651424	0.289846	3.12692	2.20614	1.21805	0.246329	-2.02134	down
ko04921	Oxytocin signaling pathway	0.204136	ENSRNOG00000017060	Ryr2	K04962	NA	ryanodine receptor 2 [Source:RGD Symbol;Acc:620314]	0.186399	0.211602	0.108926	0.285075	0.300051	1.47817	0.245687	-2.0251	down
ko04921	Oxytocin signaling pathway	0.204136	ENSRNOG00000031955	Calml3	K02183	NA	calmodulin-like 3 [Source:RGD Symbol;Acc:1305499]	8.24095	6.21762	6.22888	7.09436	20.7509	26.911	0.37781	-1.40427	down
ko04921	Oxytocin signaling pathway	0.204136	ENSRNOG00000059479	Adcy1	K08041	EC:4.6.1.1	adenylate cyclase 1 [Source:RGD Symbol;Acc:1309318]	0.206208	0.356452	0.124273	1.21653	0.813194	0.51294	0.270163	-1.8881	down
ko04514	Cell adhesion molecules (CAMs)	0.204136	ENSRNOG00000001926	Cldn1	K06087	NA	claudin 1 [Source:RGD Symbol;Acc:68422]	0.854451	0.532531	0.439747	1.41622	1.43284	1.98282	0.378057	-1.40332	down
ko04514	Cell adhesion molecules (CAMs)	0.204136	ENSRNOG00000002723	Sele	K06494	NA	selectin E [Source:RGD Symbol;Acc:3654]	2.98187	1.19921	3.6168	0.148222	0.414433	0.461137	7.61667	2.92916	up
ko04514	Cell adhesion molecules (CAMs)	0.204136	ENSRNOG00000002794	Selp	K06496	NA	selectin P [Source:RGD Symbol;Acc:3656]	3.596	2.43421	6.01392	0.725463	1.69202	1.63187	2.97434	1.57257	up
ko04514	Cell adhesion molecules (CAMs)	0.204136	ENSRNOG00000006569	Itgb8	K06591	NA	integrin subunit beta 8 [Source:RGD Symbol;Acc:1311374]	2.69064	1.81036	3.42008	0.970632	0.984076	0.573387	3.13322	1.64765	up
ko04514	Cell adhesion molecules (CAMs)	0.204136	ENSRNOG00000036826	Glycam1	K06815	NA	glycosylation dependent cell adhesion molecule 1 [Source:RGD Symbol;Acc:2712]	0	0	0	0	0	33.6115	8.92551e-06	-16.7736	down
ko05164	Influenza A	0.215043	ENSRNOG00000002946	Socs3	K04696	NA	suppressor of cytokine signaling 3 [Source:RGD Symbol;Acc:621087]	50.4008	65.1614	87.6908	40.5991	23.2455	16.4051	2.53276	1.34071	up
ko05164	Influenza A	0.215043	ENSRNOG00000004649	Il1b	K04519	NA	interleukin 1 beta [Source:RGD Symbol;Acc:2891]	17.0922	15.7097	15.266	6.22867	5.3594	4.98742	2.89994	1.53602	up
ko05164	Influenza A	0.215043	ENSRNOG00000007159	Ccl2	K14624	NA	C-C motif chemokine ligand 2 [Source:RGD Symbol;Acc:3645]	37.7066	18.9936	41.8423	1.13671	3.71253	3.7896	11.4069	3.51183	up
ko05164	Influenza A	0.215043	ENSRNOG00000010278	Il6	K05405	NA	interleukin 6 [Source:RGD Symbol;Acc:2901]	3.16485	2.11915	11.0231	0.105601	0.098662	0.045109	65.3927	6.03106	up
ko05164	Influenza A	0.215043	ENSRNOG00000029768	Ccl12	K14624	NA	chemokine (C-C motif) ligand 12 [Source:RGD Symbol;Acc:1309255]	6.0007	2.47451	2.57848	0.194217	0.89901	0.367082	7.56941	2.92018	up
ko00270	Cysteine and methionine metabolism	0.240211	ENSRNOG00000000158	Cdo1	K00456	EC:1.13.11.20	cysteine dioxygenase type 1 [Source:RGD Symbol;Acc:69262]	13.6117	16.2309	8.62663	48.0212	33.1986	69.6373	0.255005	-1.9714	down
ko00270	Cysteine and methionine metabolism	0.240211	ENSRNOG00000015514	Bcat1	NA	NA	branched chain amino acid transaminase 1 [Source:RGD Symbol;Acc:2195]	12.5295	6.97787	11.6416	3.05441	3.50371	6.92907	2.30952	1.2076	up
ko04961	Endocrine and other factor-regulated calcium reabsorption	0.240211	ENSRNOG00000007290	Atp1a2	K01539	EC:7.2.2.13	ATPase Na+/K+ transporting subunit alpha 2 [Source:RGD Symbol;Acc:2168]	1.11361	2.2107	0.439613	6.02731	3.2216	13.5037	0.165429	-2.59572	down
ko04961	Endocrine and other factor-regulated calcium reabsorption	0.240211	ENSRNOG00000020263	Atp1a3	K01539	EC:7.2.2.13	ATPase Na+/K+ transporting subunit alpha 3 [Source:RGD Symbol;Acc:2169]	1.61757	1.90245	1.13016	0.671541	0.692308	0.956255	2.0043	1.0031	up
ko00565	Ether lipid metabolism	0.240211	ENSRNOG00000016945	Pla2g2a	NA	NA	phospholipase A2 group IIA [Source:RGD Symbol;Acc:620857]	430.776	142.041	305.208	31.8882	19.843	49.1573	8.70292	3.1215	up
ko00565	Ether lipid metabolism	0.240211	ENSRNOG00000025691	Pla2g7	K01062	EC:3.1.1.47	phospholipase A2 group VII [Source:RGD Symbol;Acc:1310734]	10.9129	7.49608	7.40635	1.91299	2.90558	5.81907	2.42679	1.27905	up
ko05030	Cocaine addiction	0.247782	ENSRNOG00000028404	Ppp1r1b	K15494	NA	protein phosphatase 1, regulatory (inhibitor) subunit 1B [Source:RGD Symbol;Acc:621859]	7.76903	6.02664	5.6708	22.4231	7.67647	15.2862	0.428911	-1.22125	down
ko05030	Cocaine addiction	0.247782	ENSRNOG00000046667	Fosb	K09029	NA	FosB proto-oncogene, AP-1 transcription factor subunit [Source:RGD Symbol;Acc:1308198]	4.40301	29.0803	28.1312	2.28038	1.38324	1.99461	10.8894	3.44485	up
ko04211	Longevity regulating pathway	0.254669	ENSRNOG00000004473	Ppargc1a	K07202	NA	PPARG coactivator 1 alpha [Source:RGD Symbol;Acc:620925]	0.699099	0.733841	0.380414	1.53806	1.6784	1.50382	0.384163	-1.38021	down
ko04211	Longevity regulating pathway	0.254669	ENSRNOG00000019048	Sod2	K04564	EC:1.15.1.1	superoxide dismutase 2 [Source:RGD Symbol;Acc:3732]	144.337	78.5731	208.619	40.7461	61.5904	73.5054	2.45407	1.29518	up
ko04211	Longevity regulating pathway	0.254669	ENSRNOG00000059479	Adcy1	K08041	EC:4.6.1.1	adenylate cyclase 1 [Source:RGD Symbol;Acc:1309318]	0.206208	0.356452	0.124273	1.21653	0.813194	0.51294	0.270163	-1.8881	down
ko04913	Ovarian steroidogenesis	0.255361	ENSRNOG00000019500	Cyp1a1	K07408	EC:1.14.14.1	cytochrome P450, family 1, subfamily a, polypeptide 1 [Source:RGD Symbol;Acc:2458]	3.79747	8.76837	3.6107	28.2685	25.6761	8.90865	0.25737	-1.95808	down
ko04913	Ovarian steroidogenesis	0.255361	ENSRNOG00000059479	Adcy1	K08041	EC:4.6.1.1	adenylate cyclase 1 [Source:RGD Symbol;Acc:1309318]	0.206208	0.356452	0.124273	1.21653	0.813194	0.51294	0.270163	-1.8881	down
ko04540	Gap junction	0.26017	ENSRNOG00000018371	Tubb6	K07375	NA	tubulin, beta 6 class V [Source:RGD Symbol;Acc:1305887]	51.3781	46.6999	62.9911	19.1659	30.0293	30.0424	2.03274	1.02342	up
ko04540	Gap junction	0.26017	ENSRNOG00000048169	Tuba8	K07374	NA	tubulin, alpha 8 [Source:RGD Symbol;Acc:1566041]	3.55351	3.77764	3.98149	1.19674	1.13894	1.48065	2.96428	1.56768	up
ko04540	Gap junction	0.26017	ENSRNOG00000059479	Adcy1	K08041	EC:4.6.1.1	adenylate cyclase 1 [Source:RGD Symbol;Acc:1309318]	0.206208	0.356452	0.124273	1.21653	0.813194	0.51294	0.270163	-1.8881	down
ko04915	Estrogen signaling pathway	0.26301	ENSRNOG00000014099	Krt15	K07604	NA	keratin 15 [Source:RGD Symbol;Acc:1303044]	0.401932	0.587568	0.379119	2.4004	0.959421	28.7987	0.0425586	-4.55441	down
ko04915	Estrogen signaling pathway	0.26301	ENSRNOG00000022523	Fkbp5	K09571	EC:5.2.1.8	FKBP prolyl isomerase 5 [Source:RGD Symbol;Acc:1309155]	10.6739	10.2676	11.1153	45.9607	15.4436	30.4565	0.348972	-1.51882	down
ko04915	Estrogen signaling pathway	0.26301	ENSRNOG00000031955	Calml3	K02183	NA	calmodulin-like 3 [Source:RGD Symbol;Acc:1305499]	8.24095	6.21762	6.22888	7.09436	20.7509	26.911	0.37781	-1.40427	down
ko04915	Estrogen signaling pathway	0.26301	ENSRNOG00000059479	Adcy1	K08041	EC:4.6.1.1	adenylate cyclase 1 [Source:RGD Symbol;Acc:1309318]	0.206208	0.356452	0.124273	1.21653	0.813194	0.51294	0.270163	-1.8881	down
ko04728	Dopaminergic synapse	0.267519	ENSRNOG00000014448	Arntl	NA	NA	aryl hydrocarbon receptor nuclear translocator-like [Source:RGD Symbol;Acc:62003]	7.69285	5.52374	7.07682	4.26659	2.17754	3.16265	2.1124	1.07889	up
ko04728	Dopaminergic synapse	0.267519	ENSRNOG00000028404	Ppp1r1b	K15494	NA	protein phosphatase 1, regulatory (inhibitor) subunit 1B [Source:RGD Symbol;Acc:621859]	7.76903	6.02664	5.6708	22.4231	7.67647	15.2862	0.428911	-1.22125	down
ko04728	Dopaminergic synapse	0.267519	ENSRNOG00000031955	Calml3	K02183	NA	calmodulin-like 3 [Source:RGD Symbol;Acc:1305499]	8.24095	6.21762	6.22888	7.09436	20.7509	26.911	0.37781	-1.40427	down
ko04728	Dopaminergic synapse	0.267519	ENSRNOG00000058202	Ppp2r2c	K04354	NA	protein phosphatase 2, regulatory subunit B, gamma [Source:RGD Symbol;Acc:620920]	2.33288	2.81765	3.45571	0.925882	1.19049	0.648675	3.11251	1.63808	up
ko04912	GnRH signaling pathway	0.276761	ENSRNOG00000019422	Egr1	K09203	NA	early growth response 1 [Source:RGD Symbol;Acc:2544]	28.8778	81.6766	49.115	5.6807	12.1778	9.44428	5.8481	2.54797	up
ko04912	GnRH signaling pathway	0.276761	ENSRNOG00000031955	Calml3	K02183	NA	calmodulin-like 3 [Source:RGD Symbol;Acc:1305499]	8.24095	6.21762	6.22888	7.09436	20.7509	26.911	0.37781	-1.40427	down
ko04912	GnRH signaling pathway	0.276761	ENSRNOG00000059479	Adcy1	K08041	EC:4.6.1.1	adenylate cyclase 1 [Source:RGD Symbol;Acc:1309318]	0.206208	0.356452	0.124273	1.21653	0.813194	0.51294	0.270163	-1.8881	down
ko05332	Graft-versus-host disease	0.278115	ENSRNOG00000004649	Il1b	K04519	NA	interleukin 1 beta [Source:RGD Symbol;Acc:2891]	17.0922	15.7097	15.266	6.22867	5.3594	4.98742	2.89994	1.53602	up
ko05332	Graft-versus-host disease	0.278115	ENSRNOG00000010278	Il6	K05405	NA	interleukin 6 [Source:RGD Symbol;Acc:2901]	3.16485	2.11915	11.0231	0.105601	0.098662	0.045109	65.3927	6.03106	up
ko04922	Glucagon signaling pathway	0.282317	ENSRNOG00000000165	Pfkfb1	K19028	3.1.3.46;EC:2.7.1.105	6-phosphofructo-2-kinase/fructose-2,6-biphosphatase 1 [Source:RGD Symbol;Acc:3307]	1.11783	0.881053	0.727267	4.38349	2.08208	3.12985	0.284109	-1.81548	down
ko04922	Glucagon signaling pathway	0.282317	ENSRNOG00000004473	Ppargc1a	K07202	NA	PPARG coactivator 1 alpha [Source:RGD Symbol;Acc:620925]	0.699099	0.733841	0.380414	1.53806	1.6784	1.50382	0.384163	-1.38021	down
ko04922	Glucagon signaling pathway	0.282317	ENSRNOG00000031955	Calml3	K02183	NA	calmodulin-like 3 [Source:RGD Symbol;Acc:1305499]	8.24095	6.21762	6.22888	7.09436	20.7509	26.911	0.37781	-1.40427	down
ko04064	NF-kappa B signaling pathway	0.282317	ENSRNOG00000002792	Cxcl2	K05505	NA	C-X-C motif chemokine ligand 2 [Source:RGD Symbol;Acc:70069]	2.67869	3.89774	3.91406	0.2245	0.858824	0.310974	7.52384	2.91147	up
ko04064	NF-kappa B signaling pathway	0.282317	ENSRNOG00000004649	Il1b	K04519	NA	interleukin 1 beta [Source:RGD Symbol;Acc:2891]	17.0922	15.7097	15.266	6.22867	5.3594	4.98742	2.89994	1.53602	up
ko04064	NF-kappa B signaling pathway	0.282317	ENSRNOG00000011406	Ccl4	K12964	NA	C-C motif chemokine ligand 4 [Source:RGD Symbol;Acc:620441]	11.707	5.81372	6.12502	3.35851	3.36341	2.87314	2.46437	1.30122	up
ko05222	Small cell lung cancer	0.282317	ENSRNOG00000004537	Rxrg	K08526	NA	retinoid X receptor gamma [Source:RGD Symbol;Acc:620046]	0.784535	1.26834	0.531943	2.96272	1.86653	2.04611	0.375954	-1.41137	down
ko05222	Small cell lung cancer	0.282317	ENSRNOG00000056129	LOC102554659	K06247	NA	laminin subunit gamma-3-like [Source:RGD Symbol;Acc:7518353]	0.143205	0.092271	0.140703	0.90736	0.821992	0.418494	0.175142	-2.5134	down
ko05222	Small cell lung cancer	0.282317	ENSRNOG00000059507	Lamc3	K06247	NA	laminin subunit gamma 3 [Source:RGD Symbol;Acc:1309399]	0.642198	0.669721	0.48091	3.66613	1.70261	2.05931	0.241359	-2.05075	down
ko00770	Pantothenate and CoA biosynthesis	0.295123	ENSRNOG00000015514	Bcat1	NA	NA	branched chain amino acid transaminase 1 [Source:RGD Symbol;Acc:2195]	12.5295	6.97787	11.6416	3.05441	3.50371	6.92907	2.30952	1.2076	up
ko04923	Regulation of lipolysis in adipocytes	0.308377	ENSRNOG00000008176	Nppa	K12334	NA	natriuretic peptide A [Source:RGD Symbol;Acc:3193]	0	0	0	0	0	4.77912	6.27731e-05	-13.9595	down
ko04923	Regulation of lipolysis in adipocytes	0.308377	ENSRNOG00000059479	Adcy1	K08041	EC:4.6.1.1	adenylate cyclase 1 [Source:RGD Symbol;Acc:1309318]	0.206208	0.356452	0.124273	1.21653	0.813194	0.51294	0.270163	-1.8881	down
ko00360	Phenylalanine metabolism	0.309494	ENSRNOG00000002331	Aldh3a1	K00129	EC:1.2.1.5	aldehyde dehydrogenase 3 family, member A1 [Source:RGD Symbol;Acc:2088]	0.906245	1.33741	0.734843	1.81694	2.09876	14.0727	0.165579	-2.59441	down
ko04070	Phosphatidylinositol signaling system	0.310221	ENSRNOG00000019361	Inpp5j	K01106	EC:3.1.3.56	inositol polyphosphate-5-phosphatase J [Source:RGD Symbol;Acc:620541]	0.503451	0.569211	0.51729	1.00663	1.27581	1.02692	0.48044	-1.05757	down
ko04070	Phosphatidylinositol signaling system	0.310221	ENSRNOG00000031955	Calml3	K02183	NA	calmodulin-like 3 [Source:RGD Symbol;Acc:1305499]	8.24095	6.21762	6.22888	7.09436	20.7509	26.911	0.37781	-1.40427	down
ko04070	Phosphatidylinositol signaling system	0.310221	ENSRNOG00000034228	Pik3c2g	K00923	EC:2.7.1.154	phosphatidylinositol-4-phosphate 3-kinase, catalytic subunit type 2 gamma [Source:RGD Symbol;Acc:620231]	0.127406	0.105148	0.085239	0.299671	0.21173	0.536971	0.30313	-1.72199	down
ko04020	Calcium signaling pathway	0.311703	ENSRNOG00000004400	Avpr1a	K04226	NA	arginine vasopressin receptor 1A [Source:RGD Symbol;Acc:2185]	0.884247	0.991065	0.583946	1.63749	2.34024	1.80556	0.425235	-1.23367	down
ko04020	Calcium signaling pathway	0.311703	ENSRNOG00000017060	Ryr2	K04962	NA	ryanodine receptor 2 [Source:RGD Symbol;Acc:620314]	0.186399	0.211602	0.108926	0.285075	0.300051	1.47817	0.245687	-2.0251	down
ko04020	Calcium signaling pathway	0.311703	ENSRNOG00000018827	LOC103694905	K04163	NA	5-hydroxytryptamine receptor 7 [Source:RGD Symbol;Acc:9265298]	0.601136	0.302224	0.67299	0.0940072	0.184716	0.168906	3.52156	1.81621	up
ko04020	Calcium signaling pathway	0.311703	ENSRNOG00000031955	Calml3	K02183	NA	calmodulin-like 3 [Source:RGD Symbol;Acc:1305499]	8.24095	6.21762	6.22888	7.09436	20.7509	26.911	0.37781	-1.40427	down
ko04020	Calcium signaling pathway	0.311703	ENSRNOG00000059479	Adcy1	K08041	EC:4.6.1.1	adenylate cyclase 1 [Source:RGD Symbol;Acc:1309318]	0.206208	0.356452	0.124273	1.21653	0.813194	0.51294	0.270163	-1.8881	down
ko05202	Transcriptional misregulation in cancer	0.31572	ENSRNOG00000004537	Rxrg	K08526	NA	retinoid X receptor gamma [Source:RGD Symbol;Acc:620046]	0.784535	1.26834	0.531943	2.96272	1.86653	2.04611	0.375954	-1.41137	down
ko05202	Transcriptional misregulation in cancer	0.31572	ENSRNOG00000010278	Il6	K05405	NA	interleukin 6 [Source:RGD Symbol;Acc:2901]	3.16485	2.11915	11.0231	0.105601	0.098662	0.045109	65.3927	6.03106	up
ko05202	Transcriptional misregulation in cancer	0.31572	ENSRNOG00000013074	Wt1	K09234	NA	WT1 transcription factor [Source:RGD Symbol;Acc:3974]	6.51322	3.77358	7.11635	1.80892	3.61924	2.35499	2.236	1.16092	up
ko05202	Transcriptional misregulation in cancer	0.31572	ENSRNOG00000020254	Per2	K02633	NA	period circadian regulator 2 [Source:RGD Symbol;Acc:61945]	5.08553	8.59563	7.97541	10.986	14.3571	23.4713	0.443651	-1.1725	down
ko05202	Transcriptional misregulation in cancer	0.31572	ENSRNOG00000029980	Zbtb16	K10055	NA	zinc finger and BTB domain containing 16 [Source:RGD Symbol;Acc:727921]	2.73773	1.60881	0.909087	49.7177	4.1456	27.6044	0.0645117	-3.95429	down
ko00220	Arginine biosynthesis	0.323574	ENSRNOG00000013304	Arg1	K01476	EC:3.5.3.1	arginase 1 [Source:RGD Symbol;Acc:2150]	38.2968	26.0177	49.9768	8.35733	12.4054	14.4375	3.24689	1.69906	up
ko04940	Type I diabetes mellitus	0.33839	ENSRNOG00000004649	Il1b	K04519	NA	interleukin 1 beta [Source:RGD Symbol;Acc:2891]	17.0922	15.7097	15.266	6.22867	5.3594	4.98742	2.89994	1.53602	up
ko04940	Type I diabetes mellitus	0.33839	ENSRNOG00000019587	Ptprn	K07817	EC:3.1.3.48	protein tyrosine phosphatase, receptor type, N [Source:RGD Symbol;Acc:620777]	3.28822	1.58827	3.5683	0.404913	0.311202	1.36381	4.06013	2.02153	up
ko04659	Th17 cell differentiation	0.349409	ENSRNOG00000004537	Rxrg	K08526	NA	retinoid X receptor gamma [Source:RGD Symbol;Acc:620046]	0.784535	1.26834	0.531943	2.96272	1.86653	2.04611	0.375954	-1.41137	down
ko04659	Th17 cell differentiation	0.349409	ENSRNOG00000004649	Il1b	K04519	NA	interleukin 1 beta [Source:RGD Symbol;Acc:2891]	17.0922	15.7097	15.266	6.22867	5.3594	4.98742	2.89994	1.53602	up
ko04659	Th17 cell differentiation	0.349409	ENSRNOG00000010278	Il6	K05405	NA	interleukin 6 [Source:RGD Symbol;Acc:2901]	3.16485	2.11915	11.0231	0.105601	0.098662	0.045109	65.3927	6.03106	up
ko04213	Longevity regulating pathway - multiple species	0.353257	ENSRNOG00000019048	Sod2	K04564	EC:1.15.1.1	superoxide dismutase 2 [Source:RGD Symbol;Acc:3732]	144.337	78.5731	208.619	40.7461	61.5904	73.5054	2.45407	1.29518	up
ko04213	Longevity regulating pathway - multiple species	0.353257	ENSRNOG00000059479	Adcy1	K08041	EC:4.6.1.1	adenylate cyclase 1 [Source:RGD Symbol;Acc:1309318]	0.206208	0.356452	0.124273	1.21653	0.813194	0.51294	0.270163	-1.8881	down
ko04931	Insulin resistance	0.360582	ENSRNOG00000002946	Socs3	K04696	NA	suppressor of cytokine signaling 3 [Source:RGD Symbol;Acc:621087]	50.4008	65.1614	87.6908	40.5991	23.2455	16.4051	2.53276	1.34071	up
ko04931	Insulin resistance	0.360582	ENSRNOG00000004473	Ppargc1a	K07202	NA	PPARG coactivator 1 alpha [Source:RGD Symbol;Acc:620925]	0.699099	0.733841	0.380414	1.53806	1.6784	1.50382	0.384163	-1.38021	down
ko04931	Insulin resistance	0.360582	ENSRNOG00000010278	Il6	K05405	NA	interleukin 6 [Source:RGD Symbol;Acc:2901]	3.16485	2.11915	11.0231	0.105601	0.098662	0.045109	65.3927	6.03106	up
ko00010	Glycolysis / Gluconeogenesis	0.360648	ENSRNOG00000002331	Aldh3a1	K00129	EC:1.2.1.5	aldehyde dehydrogenase 3 family, member A1 [Source:RGD Symbol;Acc:2088]	0.906245	1.33741	0.734843	1.81694	2.09876	14.0727	0.165579	-2.59441	down
ko00010	Glycolysis / Gluconeogenesis	0.360648	ENSRNOG00000012436	Adh6	K13951;K13952	EC:1.1.1.1	alcohol dehydrogenase 1 (class I) [Source:RGD Symbol;Acc:2044]	3.44215	4.16162	1.57908	6.77746	7.28181	9.62364	0.387742	-1.36683	down
ko00340	Histidine metabolism	0.364126	ENSRNOG00000002331	Aldh3a1	K00129	EC:1.2.1.5	aldehyde dehydrogenase 3 family, member A1 [Source:RGD Symbol;Acc:2088]	0.906245	1.33741	0.734843	1.81694	2.09876	14.0727	0.165579	-2.59441	down
ko04928	Parathyroid hormone synthesis, secretion and action	0.366159	ENSRNOG00000004537	Rxrg	K08526	NA	retinoid X receptor gamma [Source:RGD Symbol;Acc:620046]	0.784535	1.26834	0.531943	2.96272	1.86653	2.04611	0.375954	-1.41137	down
ko04928	Parathyroid hormone synthesis, secretion and action	0.366159	ENSRNOG00000019422	Egr1	K09203	NA	early growth response 1 [Source:RGD Symbol;Acc:2544]	28.8778	81.6766	49.115	5.6807	12.1778	9.44428	5.8481	2.54797	up
ko04928	Parathyroid hormone synthesis, secretion and action	0.366159	ENSRNOG00000059479	Adcy1	K08041	EC:4.6.1.1	adenylate cyclase 1 [Source:RGD Symbol;Acc:1309318]	0.206208	0.356452	0.124273	1.21653	0.813194	0.51294	0.270163	-1.8881	down
ko04720	Long-term potentiation	0.368008	ENSRNOG00000031955	Calml3	K02183	NA	calmodulin-like 3 [Source:RGD Symbol;Acc:1305499]	8.24095	6.21762	6.22888	7.09436	20.7509	26.911	0.37781	-1.40427	down
ko04720	Long-term potentiation	0.368008	ENSRNOG00000059479	Adcy1	K08041	EC:4.6.1.1	adenylate cyclase 1 [Source:RGD Symbol;Acc:1309318]	0.206208	0.356452	0.124273	1.21653	0.813194	0.51294	0.270163	-1.8881	down
ko00592	alpha-Linolenic acid metabolism	0.3771	ENSRNOG00000016945	Pla2g2a	NA	NA	phospholipase A2 group IIA [Source:RGD Symbol;Acc:620857]	430.776	142.041	305.208	31.8882	19.843	49.1573	8.70292	3.1215	up
ko05221	Acute myeloid leukemia	0.397104	ENSRNOG00000020254	Per2	K02633	NA	period circadian regulator 2 [Source:RGD Symbol;Acc:61945]	5.08553	8.59563	7.97541	10.986	14.3571	23.4713	0.443651	-1.1725	down
ko05221	Acute myeloid leukemia	0.397104	ENSRNOG00000029980	Zbtb16	K10055	NA	zinc finger and BTB domain containing 16 [Source:RGD Symbol;Acc:727921]	2.73773	1.60881	0.909087	49.7177	4.1456	27.6044	0.0645117	-3.95429	down
ko04744	Phototransduction	0.402263	ENSRNOG00000031955	Calml3	K02183	NA	calmodulin-like 3 [Source:RGD Symbol;Acc:1305499]	8.24095	6.21762	6.22888	7.09436	20.7509	26.911	0.37781	-1.40427	down
ko00650	Butanoate metabolism	0.402263	ENSRNOG00000019120	Hmgcs2	K01641	EC:2.3.3.10	3-hydroxy-3-methylglutaryl-CoA synthase 2 [Source:RGD Symbol;Acc:2804]	5.71888	6.61347	2.53401	17.9587	10.1034	13.6071	0.356771	-1.48693	down
ko04726	Serotonergic synapse	0.404928	ENSRNOG00000018827	LOC103694905	K04163	NA	5-hydroxytryptamine receptor 7 [Source:RGD Symbol;Acc:9265298]	0.601136	0.302224	0.67299	0.0940072	0.184716	0.168906	3.52156	1.81621	up
ko04726	Serotonergic synapse	0.404928	ENSRNOG00000019183	Alox15	K00460	EC:1.13.11.33	arachidonate 15-lipoxygenase [Source:RGD Symbol;Acc:70493]	3.17012	1.75927	2.65063	3.59856	4.73835	17.0034	0.299129	-1.74116	down
ko04726	Serotonergic synapse	0.404928	ENSRNOG00000032261	Cyp2d4	K07414	EC:1.14.14.1	cytochrome P450, family 2, subfamily d, polypeptide 4 [Source:RGD Symbol;Acc:620640]	3.90219	4.53709	2.88962	9.25606	7.48095	6.29301	0.491919	-1.02351	down
ko04919	Thyroid hormone signaling pathway	0.410417	ENSRNOG00000004537	Rxrg	K08526	NA	retinoid X receptor gamma [Source:RGD Symbol;Acc:620046]	0.784535	1.26834	0.531943	2.96272	1.86653	2.04611	0.375954	-1.41137	down
ko04919	Thyroid hormone signaling pathway	0.410417	ENSRNOG00000007290	Atp1a2	K01539	EC:7.2.2.13	ATPase Na+/K+ transporting subunit alpha 2 [Source:RGD Symbol;Acc:2168]	1.11361	2.2107	0.439613	6.02731	3.2216	13.5037	0.165429	-2.59572	down
ko04919	Thyroid hormone signaling pathway	0.410417	ENSRNOG00000020263	Atp1a3	K01539	EC:7.2.2.13	ATPase Na+/K+ transporting subunit alpha 3 [Source:RGD Symbol;Acc:2169]	1.61757	1.90245	1.13016	0.671541	0.692308	0.956255	2.0043	1.0031	up
ko04966	Collecting duct acid secretion	0.414464	ENSRNOG00000020951	Slc4a1	K06573	NA	solute carrier family 4 member 1 (Diego blood group) [Source:RGD Symbol;Acc:3710]	0.638523	0.746664	0.545707	1.90142	2.54942	4.14042	0.224751	-2.1536	down
ko00512	Mucin type O-glycan biosynthesis	0.414464	ENSRNOG00000000251	St6galnac1	K03479	EC:2.4.99.3	ST6 N-acetylgalactosaminide alpha-2,6-sialyltransferase 1 [Source:RGD Symbol;Acc:1562048]	0.404718	0.01927	0.588358	0	0.020627	0	49.0787	5.61702	up
ko04924	Renin secretion	0.432589	ENSRNOG00000008176	Nppa	K12334	NA	natriuretic peptide A [Source:RGD Symbol;Acc:3193]	0	0	0	0	0	4.77912	6.27731e-05	-13.9595	down
ko04924	Renin secretion	0.432589	ENSRNOG00000031955	Calml3	K02183	NA	calmodulin-like 3 [Source:RGD Symbol;Acc:1305499]	8.24095	6.21762	6.22888	7.09436	20.7509	26.911	0.37781	-1.40427	down
ko05416	Viral myocarditis	0.446474	ENSRNOG00000002372	Sgcd	K12563	NA	sarcoglycan, delta [Source:RGD Symbol;Acc:1306638]	0.93466	1.49454	1.00184	2.76866	3.11875	2.25635	0.421309	-1.24705	down
ko05416	Viral myocarditis	0.446474	ENSRNOG00000016983	Myh7	K17751	NA	myosin heavy chain 7 [Source:RGD Symbol;Acc:62030]	0	0.002143	0	0.00806	0.008274	5.03787	0.000424004	-11.2036	down
ko04152	AMPK signaling pathway	0.448371	ENSRNOG00000000165	Pfkfb1	K19028	3.1.3.46;EC:2.7.1.105	6-phosphofructo-2-kinase/fructose-2,6-biphosphatase 1 [Source:RGD Symbol;Acc:3307]	1.11783	0.881053	0.727267	4.38349	2.08208	3.12985	0.284109	-1.81548	down
ko04152	AMPK signaling pathway	0.448371	ENSRNOG00000004473	Ppargc1a	K07202	NA	PPARG coactivator 1 alpha [Source:RGD Symbol;Acc:620925]	0.699099	0.733841	0.380414	1.53806	1.6784	1.50382	0.384163	-1.38021	down
ko04152	AMPK signaling pathway	0.448371	ENSRNOG00000058202	Ppp2r2c	K04354	NA	protein phosphatase 2, regulatory subunit B, gamma [Source:RGD Symbol;Acc:620920]	2.33288	2.81765	3.45571	0.925882	1.19049	0.648675	3.11251	1.63808	up
ko00562	Inositol phosphate metabolism	0.453346	ENSRNOG00000019361	Inpp5j	K01106	EC:3.1.3.56	inositol polyphosphate-5-phosphatase J [Source:RGD Symbol;Acc:620541]	0.503451	0.569211	0.51729	1.00663	1.27581	1.02692	0.48044	-1.05757	down
ko00562	Inositol phosphate metabolism	0.453346	ENSRNOG00000034228	Pik3c2g	K00923	EC:2.7.1.154	phosphatidylinositol-4-phosphate 3-kinase, catalytic subunit type 2 gamma [Source:RGD Symbol;Acc:620231]	0.127406	0.105148	0.085239	0.299671	0.21173	0.536971	0.30313	-1.72199	down
ko00410	beta-Alanine metabolism	0.460841	ENSRNOG00000002331	Aldh3a1	K00129	EC:1.2.1.5	aldehyde dehydrogenase 3 family, member A1 [Source:RGD Symbol;Acc:2088]	0.906245	1.33741	0.734843	1.81694	2.09876	14.0727	0.165579	-2.59441	down
ko05034	Alcoholism	0.460898	ENSRNOG00000018839	Ntrk2	K04360	EC:2.7.10.1	neurotrophic receptor tyrosine kinase 2 [Source:RGD Symbol;Acc:3213]	2.74908	5.01041	5.1754	1.89725	0.712652	1.98932	2.81241	1.49181	up
ko05034	Alcoholism	0.460898	ENSRNOG00000028404	Ppp1r1b	K15494	NA	protein phosphatase 1, regulatory (inhibitor) subunit 1B [Source:RGD Symbol;Acc:621859]	7.76903	6.02664	5.6708	22.4231	7.67647	15.2862	0.428911	-1.22125	down
ko05034	Alcoholism	0.460898	ENSRNOG00000031955	Calml3	K02183	NA	calmodulin-like 3 [Source:RGD Symbol;Acc:1305499]	8.24095	6.21762	6.22888	7.09436	20.7509	26.911	0.37781	-1.40427	down
ko05034	Alcoholism	0.460898	ENSRNOG00000046667	Fosb	K09029	NA	FosB proto-oncogene, AP-1 transcription factor subunit [Source:RGD Symbol;Acc:1308198]	4.40301	29.0803	28.1312	2.28038	1.38324	1.99461	10.8894	3.44485	up
ko00760	Nicotinate and nicotinamide metabolism	0.482643	ENSRNOG00000062125	Aox3	K00157	EC:1.2.3.1	aldehyde oxidase 3 [Source:RGD Symbol;Acc:1359328]	0.87407	1.02473	0.56828	1.87058	1.06784	3.69308	0.372024	-1.42653	down
ko05010	Alzheimer disease	0.483248	ENSRNOG00000004649	Il1b	K04519	NA	interleukin 1 beta [Source:RGD Symbol;Acc:2891]	17.0922	15.7097	15.266	6.22867	5.3594	4.98742	2.89994	1.53602	up
ko05010	Alzheimer disease	0.483248	ENSRNOG00000008656	Snca	K04528	NA	synuclein alpha [Source:RGD Symbol;Acc:3729]	0.033831	0	0.067124	0.192924	0.624332	0.823897	0.0615147	-4.02293	down
ko05010	Alzheimer disease	0.483248	ENSRNOG00000014656	Cox8b	K02273	NA	cytochrome c oxidase, subunit VIIIb [Source:RGD Symbol;Acc:2386]	0.277625	0.746188	0	1.76709	3.81586	10.2263	0.0647605	-3.94874	down
ko05010	Alzheimer disease	0.483248	ENSRNOG00000031955	Calml3	K02183	NA	calmodulin-like 3 [Source:RGD Symbol;Acc:1305499]	8.24095	6.21762	6.22888	7.09436	20.7509	26.911	0.37781	-1.40427	down
ko04910	Insulin signaling pathway	0.485331	ENSRNOG00000002946	Socs3	K04696	NA	suppressor of cytokine signaling 3 [Source:RGD Symbol;Acc:621087]	50.4008	65.1614	87.6908	40.5991	23.2455	16.4051	2.53276	1.34071	up
ko04910	Insulin signaling pathway	0.485331	ENSRNOG00000004473	Ppargc1a	K07202	NA	PPARG coactivator 1 alpha [Source:RGD Symbol;Acc:620925]	0.699099	0.733841	0.380414	1.53806	1.6784	1.50382	0.384163	-1.38021	down
ko04910	Insulin signaling pathway	0.485331	ENSRNOG00000031955	Calml3	K02183	NA	calmodulin-like 3 [Source:RGD Symbol;Acc:1305499]	8.24095	6.21762	6.22888	7.09436	20.7509	26.911	0.37781	-1.40427	down
ko00051	Fructose and mannose metabolism	0.513714	ENSRNOG00000000165	Pfkfb1	K19028	3.1.3.46;EC:2.7.1.105	6-phosphofructo-2-kinase/fructose-2,6-biphosphatase 1 [Source:RGD Symbol;Acc:3307]	1.11783	0.881053	0.727267	4.38349	2.08208	3.12985	0.284109	-1.81548	down
ko04012	ErbB signaling pathway	0.525579	ENSRNOG00000002754	Areg	K09782	NA	amphiregulin [Source:RGD Symbol;Acc:2149]	15.0098	32.3225	41.5271	8.39391	7.3053	7.32716	3.85902	1.94824	up
ko04012	ErbB signaling pathway	0.525579	ENSRNOG00000002771	Ereg	K09784	NA	epiregulin [Source:RGD Symbol;Acc:620299]	3.53527	6.81166	10.5663	1.17724	1.04308	1.27508	5.98307	2.58089	up
ko05165	Human papillomavirus infection	0.529618	ENSRNOG00000006569	Itgb8	K06591	NA	integrin subunit beta 8 [Source:RGD Symbol;Acc:1311374]	2.69064	1.81036	3.42008	0.970632	0.984076	0.573387	3.13322	1.64765	up
ko05165	Human papillomavirus infection	0.529618	ENSRNOG00000010529	Thbs2	K04659	NA	thrombospondin 2 [Source:RGD Symbol;Acc:1310979]	16.9175	9.7328	15.9974	2.57939	6.01878	6.82916	2.76443	1.46698	up
ko05165	Human papillomavirus infection	0.529618	ENSRNOG00000045829	Thbs1	K16857	NA	thrombospondin 1 [Source:RGD Symbol;Acc:1588455]	69.4641	106.372	164.303	44.915	55.3273	28.7153	2.6376	1.39923	up
ko05165	Human papillomavirus infection	0.529618	ENSRNOG00000056129	LOC102554659	K06247	NA	laminin subunit gamma-3-like [Source:RGD Symbol;Acc:7518353]	0.143205	0.092271	0.140703	0.90736	0.821992	0.418494	0.175142	-2.5134	down
ko05165	Human papillomavirus infection	0.529618	ENSRNOG00000058202	Ppp2r2c	K04354	NA	protein phosphatase 2, regulatory subunit B, gamma [Source:RGD Symbol;Acc:620920]	2.33288	2.81765	3.45571	0.925882	1.19049	0.648675	3.11251	1.63808	up
ko05165	Human papillomavirus infection	0.529618	ENSRNOG00000058645	Tnc	K06252	NA	tenascin C [Source:RGD Symbol;Acc:621057]	32.8819	24.6221	38.6851	10.8562	17.6057	12.6766	2.33817	1.22538	up
ko05165	Human papillomavirus infection	0.529618	ENSRNOG00000059507	Lamc3	K06247	NA	laminin subunit gamma 3 [Source:RGD Symbol;Acc:1309399]	0.642198	0.669721	0.48091	3.66613	1.70261	2.05931	0.241359	-2.05075	down
ko05210	Colorectal cancer	0.531824	ENSRNOG00000002754	Areg	K09782	NA	amphiregulin [Source:RGD Symbol;Acc:2149]	15.0098	32.3225	41.5271	8.39391	7.3053	7.32716	3.85902	1.94824	up
ko05210	Colorectal cancer	0.531824	ENSRNOG00000002771	Ereg	K09784	NA	epiregulin [Source:RGD Symbol;Acc:620299]	3.53527	6.81166	10.5663	1.17724	1.04308	1.27508	5.98307	2.58089	up
ko05340	Primary immunodeficiency	0.533392	ENSRNOG00000020125	Cd79a	K06506	NA	CD79a molecule [Source:NCBI gene;Acc:100913063]	8.42119	9.76417	4.53518	19.4527	12.0454	19.0285	0.449674	-1.15305	down
ko05216	Thyroid cancer	0.542932	ENSRNOG00000004537	Rxrg	K08526	NA	retinoid X receptor gamma [Source:RGD Symbol;Acc:620046]	0.784535	1.26834	0.531943	2.96272	1.86653	2.04611	0.375954	-1.41137	down
ko00260	Glycine, serine and threonine metabolism	0.542932	ENSRNOG00000000167	Alas2	K00643	EC:2.3.1.37	5'-aminolevulinate synthase 2 [Source:RGD Symbol;Acc:2084]	6.09555	7.97318	4.91833	9.86952	17.5757	19.2731	0.406416	-1.29897	down
ko05219	Bladder cancer	0.542932	ENSRNOG00000045829	Thbs1	K16857	NA	thrombospondin 1 [Source:RGD Symbol;Acc:1588455]	69.4641	106.372	164.303	44.915	55.3273	28.7153	2.6376	1.39923	up
ko04975	Fat digestion and absorption	0.542932	ENSRNOG00000016945	Pla2g2a	NA	NA	phospholipase A2 group IIA [Source:RGD Symbol;Acc:620857]	430.776	142.041	305.208	31.8882	19.843	49.1573	8.70292	3.1215	up
ko05167	Kaposi sarcoma-associated herpesvirus infection	0.54374	ENSRNOG00000002792	Cxcl2	K05505	NA	C-X-C motif chemokine ligand 2 [Source:RGD Symbol;Acc:70069]	2.67869	3.89774	3.91406	0.2245	0.858824	0.310974	7.52384	2.91147	up
ko05167	Kaposi sarcoma-associated herpesvirus infection	0.54374	ENSRNOG00000002802	Cxcl1	K05505	NA	C-X-C motif chemokine ligand 1 [Source:RGD Symbol;Acc:619869]	37.7589	31.9443	77.5216	7.05145	18.0701	6.03944	4.72466	2.24021	up
ko05167	Kaposi sarcoma-associated herpesvirus infection	0.54374	ENSRNOG00000010278	Il6	K05405	NA	interleukin 6 [Source:RGD Symbol;Acc:2901]	3.16485	2.11915	11.0231	0.105601	0.098662	0.045109	65.3927	6.03106	up
ko05167	Kaposi sarcoma-associated herpesvirus infection	0.54374	ENSRNOG00000031955	Calml3	K02183	NA	calmodulin-like 3 [Source:RGD Symbol;Acc:1305499]	8.24095	6.21762	6.22888	7.09436	20.7509	26.911	0.37781	-1.40427	down
ko04640	Hematopoietic cell lineage	0.544147	ENSRNOG00000004649	Il1b	K04519	NA	interleukin 1 beta [Source:RGD Symbol;Acc:2891]	17.0922	15.7097	15.266	6.22867	5.3594	4.98742	2.89994	1.53602	up
ko04640	Hematopoietic cell lineage	0.544147	ENSRNOG00000010278	Il6	K05405	NA	interleukin 6 [Source:RGD Symbol;Acc:2901]	3.16485	2.11915	11.0231	0.105601	0.098662	0.045109	65.3927	6.03106	up
ko04010	MAPK signaling pathway	0.55261	ENSRNOG00000002754	Areg	K09782	NA	amphiregulin [Source:RGD Symbol;Acc:2149]	15.0098	32.3225	41.5271	8.39391	7.3053	7.32716	3.85902	1.94824	up
ko04010	MAPK signaling pathway	0.55261	ENSRNOG00000002771	Ereg	K09784	NA	epiregulin [Source:RGD Symbol;Acc:620299]	3.53527	6.81166	10.5663	1.17724	1.04308	1.27508	5.98307	2.58089	up
ko04010	MAPK signaling pathway	0.55261	ENSRNOG00000004649	Il1b	K04519	NA	interleukin 1 beta [Source:RGD Symbol;Acc:2891]	17.0922	15.7097	15.266	6.22867	5.3594	4.98742	2.89994	1.53602	up
ko04010	MAPK signaling pathway	0.55261	ENSRNOG00000008936	Map3k6	K04425	EC:2.7.11.25	mitogen-activated protein kinase kinase kinase 6 [Source:RGD Symbol;Acc:1304625]	4.22034	4.69714	4.9599	14.318	6.75886	7.33926	0.488363	-1.03397	down
ko04010	MAPK signaling pathway	0.55261	ENSRNOG00000011921	Dusp4	K04459	3.1.3.48;EC:3.1.3.16	dual specificity phosphatase 4 [Source:RGD Symbol;Acc:620625]	20.7688	32.9419	31.2542	12.0008	15.4791	12.8113	2.10877	1.0764	up
ko04010	MAPK signaling pathway	0.55261	ENSRNOG00000018839	Ntrk2	K04360	EC:2.7.10.1	neurotrophic receptor tyrosine kinase 2 [Source:RGD Symbol;Acc:3213]	2.74908	5.01041	5.1754	1.89725	0.712652	1.98932	2.81241	1.49181	up
ko04350	TGF-beta signaling pathway	0.568114	ENSRNOG00000014320	Inhba	NA	NA	inhibin subunit beta A [Source:RGD Symbol;Acc:62074]	1.43305	0.871656	0.743097	0.137745	0.416838	0.219709	3.93625	1.97682	up
ko04350	TGF-beta signaling pathway	0.568114	ENSRNOG00000045829	Thbs1	K16857	NA	thrombospondin 1 [Source:RGD Symbol;Acc:1588455]	69.4641	106.372	164.303	44.915	55.3273	28.7153	2.6376	1.39923	up
ko04916	Melanogenesis	0.585491	ENSRNOG00000031955	Calml3	K02183	NA	calmodulin-like 3 [Source:RGD Symbol;Acc:1305499]	8.24095	6.21762	6.22888	7.09436	20.7509	26.911	0.37781	-1.40427	down
ko04916	Melanogenesis	0.585491	ENSRNOG00000059479	Adcy1	K08041	EC:4.6.1.1	adenylate cyclase 1 [Source:RGD Symbol;Acc:1309318]	0.206208	0.356452	0.124273	1.21653	0.813194	0.51294	0.270163	-1.8881	down
ko04672	Intestinal immune network for IgA production	0.587803	ENSRNOG00000010278	Il6	K05405	NA	interleukin 6 [Source:RGD Symbol;Acc:2901]	3.16485	2.11915	11.0231	0.105601	0.098662	0.045109	65.3927	6.03106	up
ko05160	Hepatitis C	0.588367	ENSRNOG00000001926	Cldn1	K06087	NA	claudin 1 [Source:RGD Symbol;Acc:68422]	0.854451	0.532531	0.439747	1.41622	1.43284	1.98282	0.378057	-1.40332	down
ko05160	Hepatitis C	0.588367	ENSRNOG00000002946	Socs3	K04696	NA	suppressor of cytokine signaling 3 [Source:RGD Symbol;Acc:621087]	50.4008	65.1614	87.6908	40.5991	23.2455	16.4051	2.53276	1.34071	up
ko05160	Hepatitis C	0.588367	ENSRNOG00000058202	Ppp2r2c	K04354	NA	protein phosphatase 2, regulatory subunit B, gamma [Source:RGD Symbol;Acc:620920]	2.33288	2.81765	3.45571	0.925882	1.19049	0.648675	3.11251	1.63808	up
ko00564	Glycerophospholipid metabolism	0.591168	ENSRNOG00000016945	Pla2g2a	NA	NA	phospholipase A2 group IIA [Source:RGD Symbol;Acc:620857]	430.776	142.041	305.208	31.8882	19.843	49.1573	8.70292	3.1215	up
ko00564	Glycerophospholipid metabolism	0.591168	ENSRNOG00000056457	Gpd1	K00006	EC:1.1.1.8	glycerol-3-phosphate dehydrogenase 1 [Source:RGD Symbol;Acc:621381]	11.7425	9.46065	12.8299	18.8796	16.7739	36.6629	0.470613	-1.08739	down
ko00071	Fatty acid degradation	0.596238	ENSRNOG00000012436	Adh6	K13951;K13952	EC:1.1.1.1	alcohol dehydrogenase 1 (class I) [Source:RGD Symbol;Acc:2044]	3.44215	4.16162	1.57908	6.77746	7.28181	9.62364	0.387742	-1.36683	down
ko04390	Hippo signaling pathway	0.601984	ENSRNOG00000001414	Serpine1	NA	NA	serpin family E member 1 [Source:RGD Symbol;Acc:3249]	55.409	67.7847	164.683	17.9559	19.5535	21.1919	4.90409	2.29399	up
ko04390	Hippo signaling pathway	0.601984	ENSRNOG00000002754	Areg	K09782	NA	amphiregulin [Source:RGD Symbol;Acc:2149]	15.0098	32.3225	41.5271	8.39391	7.3053	7.32716	3.85902	1.94824	up
ko04390	Hippo signaling pathway	0.601984	ENSRNOG00000058202	Ppp2r2c	K04354	NA	protein phosphatase 2, regulatory subunit B, gamma [Source:RGD Symbol;Acc:620920]	2.33288	2.81765	3.45571	0.925882	1.19049	0.648675	3.11251	1.63808	up
ko00520	Amino sugar and nucleotide sugar metabolism	0.620527	ENSRNOG00000033162	Chia	K01183	EC:3.2.1.14	chitinase, acidic [Source:RGD Symbol;Acc:1303058]	315.521	274.274	276.963	62.7794	110.055	141.399	2.75832	1.46379	up
ko02010	ABC transporters	0.620527	ENSRNOG00000028781	Abcc6	K05669	NA	ATP binding cassette subfamily C member 6 [Source:RGD Symbol;Acc:620268]	0.450326	0.626688	0.272499	1.11959	1.26434	0.767212	0.428261	-1.22344	down
ko04930	Type II diabetes mellitus	0.620527	ENSRNOG00000002946	Socs3	K04696	NA	suppressor of cytokine signaling 3 [Source:RGD Symbol;Acc:621087]	50.4008	65.1614	87.6908	40.5991	23.2455	16.4051	2.53276	1.34071	up
ko05206	MicroRNAs in cancer	0.634644	ENSRNOG00000002640	Serpinb5	K10139	NA	serpin family B member 5 [Source:RGD Symbol;Acc:69342]	0	0	0	0	0	0.922211	0.000325305	-11.5859	down
ko05206	MicroRNAs in cancer	0.634644	ENSRNOG00000014117	Hmox1	K00510	EC:1.14.14.18	heme oxygenase 1 [Source:RGD Symbol;Acc:2806]	551.077	151.281	396.168	31.9406	70.2869	56.3487	6.92743	2.79232	up
ko05206	MicroRNAs in cancer	0.634644	ENSRNOG00000045829	Thbs1	K16857	NA	thrombospondin 1 [Source:RGD Symbol;Acc:1588455]	69.4641	106.372	164.303	44.915	55.3273	28.7153	2.6376	1.39923	up
ko05206	MicroRNAs in cancer	0.634644	ENSRNOG00000058645	Tnc	K06252	NA	tenascin C [Source:RGD Symbol;Acc:621057]	32.8819	24.6221	38.6851	10.8562	17.6057	12.6766	2.33817	1.22538	up
ko00330	Arginine and proline metabolism	0.643365	ENSRNOG00000013304	Arg1	K01476	EC:3.5.3.1	arginase 1 [Source:RGD Symbol;Acc:2150]	38.2968	26.0177	49.9768	8.35733	12.4054	14.4375	3.24689	1.69906	up
ko04530	Tight junction	0.649359	ENSRNOG00000001926	Cldn1	K06087	NA	claudin 1 [Source:RGD Symbol;Acc:68422]	0.854451	0.532531	0.439747	1.41622	1.43284	1.98282	0.378057	-1.40332	down
ko04530	Tight junction	0.649359	ENSRNOG00000048169	Tuba8	K07374	NA	tubulin, alpha 8 [Source:RGD Symbol;Acc:1566041]	3.55351	3.77764	3.98149	1.19674	1.13894	1.48065	2.96428	1.56768	up
ko04530	Tight junction	0.649359	ENSRNOG00000058202	Ppp2r2c	K04354	NA	protein phosphatase 2, regulatory subunit B, gamma [Source:RGD Symbol;Acc:620920]	2.33288	2.81765	3.45571	0.925882	1.19049	0.648675	3.11251	1.63808	up
ko05152	Tuberculosis	0.657533	ENSRNOG00000004649	Il1b	K04519	NA	interleukin 1 beta [Source:RGD Symbol;Acc:2891]	17.0922	15.7097	15.266	6.22867	5.3594	4.98742	2.89994	1.53602	up
ko05152	Tuberculosis	0.657533	ENSRNOG00000010278	Il6	K05405	NA	interleukin 6 [Source:RGD Symbol;Acc:2901]	3.16485	2.11915	11.0231	0.105601	0.098662	0.045109	65.3927	6.03106	up
ko05152	Tuberculosis	0.657533	ENSRNOG00000031955	Calml3	K02183	NA	calmodulin-like 3 [Source:RGD Symbol;Acc:1305499]	8.24095	6.21762	6.22888	7.09436	20.7509	26.911	0.37781	-1.40427	down
ko04114	Oocyte meiosis	0.659753	ENSRNOG00000031955	Calml3	K02183	NA	calmodulin-like 3 [Source:RGD Symbol;Acc:1305499]	8.24095	6.21762	6.22888	7.09436	20.7509	26.911	0.37781	-1.40427	down
ko04114	Oocyte meiosis	0.659753	ENSRNOG00000059479	Adcy1	K08041	EC:4.6.1.1	adenylate cyclase 1 [Source:RGD Symbol;Acc:1309318]	0.206208	0.356452	0.124273	1.21653	0.813194	0.51294	0.270163	-1.8881	down
ko04670	Leukocyte transendothelial migration	0.664631	ENSRNOG00000001926	Cldn1	K06087	NA	claudin 1 [Source:RGD Symbol;Acc:68422]	0.854451	0.532531	0.439747	1.41622	1.43284	1.98282	0.378057	-1.40332	down
ko04670	Leukocyte transendothelial migration	0.664631	ENSRNOG00000014409	Myl7	K12754	NA	myosin light chain 7 [Source:RGD Symbol;Acc:1308262]	0.119219	0.0167495	0.0100427	0.0271121	0.0105536	57.8738	0.00252129	-8.63162	down
ko04725	Cholinergic synapse	0.674219	ENSRNOG00000013869	Kcnj4	K04998	NA	potassium voltage-gated channel subfamily J member 4 [Source:RGD Symbol;Acc:621436]	0.672457	0.651424	0.289846	3.12692	2.20614	1.21805	0.246329	-2.02134	down
ko04725	Cholinergic synapse	0.674219	ENSRNOG00000059479	Adcy1	K08041	EC:4.6.1.1	adenylate cyclase 1 [Source:RGD Symbol;Acc:1309318]	0.206208	0.356452	0.124273	1.21653	0.813194	0.51294	0.270163	-1.8881	down
ko05145	Toxoplasmosis	0.674219	ENSRNOG00000056129	LOC102554659	K06247	NA	laminin subunit gamma-3-like [Source:RGD Symbol;Acc:7518353]	0.143205	0.092271	0.140703	0.90736	0.821992	0.418494	0.175142	-2.5134	down
ko05145	Toxoplasmosis	0.674219	ENSRNOG00000059507	Lamc3	K06247	NA	laminin subunit gamma 3 [Source:RGD Symbol;Acc:1309399]	0.642198	0.669721	0.48091	3.66613	1.70261	2.05931	0.241359	-2.05075	down
ko04014	Ras signaling pathway	0.683984	ENSRNOG00000016945	Pla2g2a	NA	NA	phospholipase A2 group IIA [Source:RGD Symbol;Acc:620857]	430.776	142.041	305.208	31.8882	19.843	49.1573	8.70292	3.1215	up
ko04014	Ras signaling pathway	0.683984	ENSRNOG00000018827	LOC103694905	K04163	NA	5-hydroxytryptamine receptor 7 [Source:RGD Symbol;Acc:9265298]	0.601136	0.302224	0.67299	0.0940072	0.184716	0.168906	3.52156	1.81621	up
ko04014	Ras signaling pathway	0.683984	ENSRNOG00000018839	Ntrk2	K04360	EC:2.7.10.1	neurotrophic receptor tyrosine kinase 2 [Source:RGD Symbol;Acc:3213]	2.74908	5.01041	5.1754	1.89725	0.712652	1.98932	2.81241	1.49181	up
ko04014	Ras signaling pathway	0.683984	ENSRNOG00000031955	Calml3	K02183	NA	calmodulin-like 3 [Source:RGD Symbol;Acc:1305499]	8.24095	6.21762	6.22888	7.09436	20.7509	26.911	0.37781	-1.40427	down
ko04218	Cellular senescence	0.68507	ENSRNOG00000001414	Serpine1	NA	NA	serpin family E member 1 [Source:RGD Symbol;Acc:3249]	55.409	67.7847	164.683	17.9559	19.5535	21.1919	4.90409	2.29399	up
ko04218	Cellular senescence	0.68507	ENSRNOG00000010278	Il6	K05405	NA	interleukin 6 [Source:RGD Symbol;Acc:2901]	3.16485	2.11915	11.0231	0.105601	0.098662	0.045109	65.3927	6.03106	up
ko04218	Cellular senescence	0.68507	ENSRNOG00000031955	Calml3	K02183	NA	calmodulin-like 3 [Source:RGD Symbol;Acc:1305499]	8.24095	6.21762	6.22888	7.09436	20.7509	26.911	0.37781	-1.40427	down
ko05166	Human T-cell leukemia virus 1 infection	0.697201	ENSRNOG00000000640	Egr2	K12496	NA	early growth response 2 [Source:RGD Symbol;Acc:621608]	3.15739	6.1992	6.47142	1.3654	1.96587	0.959568	3.68879	1.88315	up
ko05166	Human T-cell leukemia virus 1 infection	0.697201	ENSRNOG00000010278	Il6	K05405	NA	interleukin 6 [Source:RGD Symbol;Acc:2901]	3.16485	2.11915	11.0231	0.105601	0.098662	0.045109	65.3927	6.03106	up
ko05166	Human T-cell leukemia virus 1 infection	0.697201	ENSRNOG00000019422	Egr1	K09203	NA	early growth response 1 [Source:RGD Symbol;Acc:2544]	28.8778	81.6766	49.115	5.6807	12.1778	9.44428	5.8481	2.54797	up
ko05166	Human T-cell leukemia virus 1 infection	0.697201	ENSRNOG00000059479	Adcy1	K08041	EC:4.6.1.1	adenylate cyclase 1 [Source:RGD Symbol;Acc:1309318]	0.206208	0.356452	0.124273	1.21653	0.813194	0.51294	0.270163	-1.8881	down
ko04714	Thermogenesis	0.703662	ENSRNOG00000004473	Ppargc1a	K07202	NA	PPARG coactivator 1 alpha [Source:RGD Symbol;Acc:620925]	0.699099	0.733841	0.380414	1.53806	1.6784	1.50382	0.384163	-1.38021	down
ko04714	Thermogenesis	0.703662	ENSRNOG00000008176	Nppa	K12334	NA	natriuretic peptide A [Source:RGD Symbol;Acc:3193]	0	0	0	0	0	4.77912	6.27731e-05	-13.9595	down
ko04714	Thermogenesis	0.703662	ENSRNOG00000014656	Cox8b	K02273	NA	cytochrome c oxidase, subunit VIIIb [Source:RGD Symbol;Acc:2386]	0.277625	0.746188	0	1.76709	3.81586	10.2263	0.0647605	-3.94874	down
ko04714	Thermogenesis	0.703662	ENSRNOG00000059479	Adcy1	K08041	EC:4.6.1.1	adenylate cyclase 1 [Source:RGD Symbol;Acc:1309318]	0.206208	0.356452	0.124273	1.21653	0.813194	0.51294	0.270163	-1.8881	down
ko04722	Neurotrophin signaling pathway	0.706046	ENSRNOG00000018839	Ntrk2	K04360	EC:2.7.10.1	neurotrophic receptor tyrosine kinase 2 [Source:RGD Symbol;Acc:3213]	2.74908	5.01041	5.1754	1.89725	0.712652	1.98932	2.81241	1.49181	up
ko04722	Neurotrophin signaling pathway	0.706046	ENSRNOG00000031955	Calml3	K02183	NA	calmodulin-like 3 [Source:RGD Symbol;Acc:1305499]	8.24095	6.21762	6.22888	7.09436	20.7509	26.911	0.37781	-1.40427	down
ko04068	FoxO signaling pathway	0.723052	ENSRNOG00000010278	Il6	K05405	NA	interleukin 6 [Source:RGD Symbol;Acc:2901]	3.16485	2.11915	11.0231	0.105601	0.098662	0.045109	65.3927	6.03106	up
ko04068	FoxO signaling pathway	0.723052	ENSRNOG00000019048	Sod2	K04564	EC:1.15.1.1	superoxide dismutase 2 [Source:RGD Symbol;Acc:3732]	144.337	78.5731	208.619	40.7461	61.5904	73.5054	2.45407	1.29518	up
ko04611	Platelet activation	0.73526	ENSRNOG00000025074	Fgg	K03905	NA	fibrinogen gamma chain [Source:RGD Symbol;Acc:2613]	127.794	78.6948	180.988	61.9913	70.073	37.5544	2.2844	1.19181	up
ko04611	Platelet activation	0.73526	ENSRNOG00000059479	Adcy1	K08041	EC:4.6.1.1	adenylate cyclase 1 [Source:RGD Symbol;Acc:1309318]	0.206208	0.356452	0.124273	1.21653	0.813194	0.51294	0.270163	-1.8881	down
ko04927	Cortisol synthesis and secretion	0.738623	ENSRNOG00000059479	Adcy1	K08041	EC:4.6.1.1	adenylate cyclase 1 [Source:RGD Symbol;Acc:1309318]	0.206208	0.356452	0.124273	1.21653	0.813194	0.51294	0.270163	-1.8881	down
ko05223	Non-small cell lung cancer	0.738623	ENSRNOG00000004537	Rxrg	K08526	NA	retinoid X receptor gamma [Source:RGD Symbol;Acc:620046]	0.784535	1.26834	0.531943	2.96272	1.86653	2.04611	0.375954	-1.41137	down
ko05016	Huntington disease	0.748276	ENSRNOG00000004473	Ppargc1a	K07202	NA	PPARG coactivator 1 alpha [Source:RGD Symbol;Acc:620925]	0.699099	0.733841	0.380414	1.53806	1.6784	1.50382	0.384163	-1.38021	down
ko05016	Huntington disease	0.748276	ENSRNOG00000014656	Cox8b	K02273	NA	cytochrome c oxidase, subunit VIIIb [Source:RGD Symbol;Acc:2386]	0.277625	0.746188	0	1.76709	3.81586	10.2263	0.0647605	-3.94874	down
ko05016	Huntington disease	0.748276	ENSRNOG00000019048	Sod2	K04564	EC:1.15.1.1	superoxide dismutase 2 [Source:RGD Symbol;Acc:3732]	144.337	78.5731	208.619	40.7461	61.5904	73.5054	2.45407	1.29518	up
ko04742	Taste transduction	0.749244	ENSRNOG00000006639	Scn9a	K04841	NA	sodium voltage-gated channel alpha subunit 9 [Source:RGD Symbol;Acc:69368]	0	0	0	0.00415055	0.00708024	0.083853	0.00315511	-8.30809	down
ko00230	Purine metabolism	0.750827	ENSRNOG00000011068	Papss2	K13811	2.7.1.25;EC:2.7.7.4	3'-phosphoadenosine 5'-phosphosulfate synthase 2 [Source:RGD Symbol;Acc:1307012]	1.26168	1.73621	0.852359	2.5901	1.95362	4.37942	0.43149	-1.2126	down
ko00230	Purine metabolism	0.750827	ENSRNOG00000059479	Adcy1	K08041	EC:4.6.1.1	adenylate cyclase 1 [Source:RGD Symbol;Acc:1309318]	0.206208	0.356452	0.124273	1.21653	0.813194	0.51294	0.270163	-1.8881	down
ko04917	Prolactin signaling pathway	0.754392	ENSRNOG00000002946	Socs3	K04696	NA	suppressor of cytokine signaling 3 [Source:RGD Symbol;Acc:621087]	50.4008	65.1614	87.6908	40.5991	23.2455	16.4051	2.53276	1.34071	up
ko05140	Leishmaniasis	0.759436	ENSRNOG00000004649	Il1b	K04519	NA	interleukin 1 beta [Source:RGD Symbol;Acc:2891]	17.0922	15.7097	15.266	6.22867	5.3594	4.98742	2.89994	1.53602	up
ko05162	Measles	0.761984	ENSRNOG00000004649	Il1b	K04519	NA	interleukin 1 beta [Source:RGD Symbol;Acc:2891]	17.0922	15.7097	15.266	6.22867	5.3594	4.98742	2.89994	1.53602	up
ko05162	Measles	0.761984	ENSRNOG00000010278	Il6	K05405	NA	interleukin 6 [Source:RGD Symbol;Acc:2901]	3.16485	2.11915	11.0231	0.105601	0.098662	0.045109	65.3927	6.03106	up
ko04662	B cell receptor signaling pathway	0.764377	ENSRNOG00000020125	Cd79a	K06506	NA	CD79a molecule [Source:NCBI gene;Acc:100913063]	8.42119	9.76417	4.53518	19.4527	12.0454	19.0285	0.449674	-1.15305	down
ko04550	Signaling pathways regulating pluripotency of stem cells	0.769182	ENSRNOG00000007002	Lif	K05419	NA	LIF, interleukin 6 family cytokine [Source:RGD Symbol;Acc:620865]	2.79472	2.7336	5.46239	0.880568	1.01865	1.04408	3.73414	1.90078	up
ko04550	Signaling pathways regulating pluripotency of stem cells	0.769182	ENSRNOG00000014320	Inhba	NA	NA	inhibin subunit beta A [Source:RGD Symbol;Acc:62074]	1.43305	0.871656	0.743097	0.137745	0.416838	0.219709	3.93625	1.97682	up
ko00983	Drug metabolism - other enzymes	0.778602	ENSRNOG00000012458	Cyp2e1	K07415	EC:1.14.13.-	cytochrome P450, family 2, subfamily e, polypeptide 1 [Source:RGD Symbol;Acc:2475]	1.59029	2.0422	0.503894	5.70974	4.74285	4.83838	0.270512	-1.88624	down
ko05214	Glioma	0.778602	ENSRNOG00000031955	Calml3	K02183	NA	calmodulin-like 3 [Source:RGD Symbol;Acc:1305499]	8.24095	6.21762	6.22888	7.09436	20.7509	26.911	0.37781	-1.40427	down
ko04015	Rap1 signaling pathway	0.787363	ENSRNOG00000031955	Calml3	K02183	NA	calmodulin-like 3 [Source:RGD Symbol;Acc:1305499]	8.24095	6.21762	6.22888	7.09436	20.7509	26.911	0.37781	-1.40427	down
ko04015	Rap1 signaling pathway	0.787363	ENSRNOG00000045829	Thbs1	K16857	NA	thrombospondin 1 [Source:RGD Symbol;Acc:1588455]	69.4641	106.372	164.303	44.915	55.3273	28.7153	2.6376	1.39923	up
ko04015	Rap1 signaling pathway	0.787363	ENSRNOG00000059479	Adcy1	K08041	EC:4.6.1.1	adenylate cyclase 1 [Source:RGD Symbol;Acc:1309318]	0.206208	0.356452	0.124273	1.21653	0.813194	0.51294	0.270163	-1.8881	down
ko04721	Synaptic vesicle cycle	0.787609	ENSRNOG00000019433	Rab3a	K07882	NA	RAB3A, member RAS oncogene family [Source:RGD Symbol;Acc:3528]	5.25359	6.66674	3.95532	13.6283	11.8968	8.19245	0.470843	-1.08668	down
ko05168	Herpes simplex virus 1 infection	0.791075	ENSRNOG00000002946	Socs3	K04696	NA	suppressor of cytokine signaling 3 [Source:RGD Symbol;Acc:621087]	50.4008	65.1614	87.6908	40.5991	23.2455	16.4051	2.53276	1.34071	up
ko05168	Herpes simplex virus 1 infection	0.791075	ENSRNOG00000004649	Il1b	K04519	NA	interleukin 1 beta [Source:RGD Symbol;Acc:2891]	17.0922	15.7097	15.266	6.22867	5.3594	4.98742	2.89994	1.53602	up
ko05168	Herpes simplex virus 1 infection	0.791075	ENSRNOG00000007159	Ccl2	K14624	NA	C-C motif chemokine ligand 2 [Source:RGD Symbol;Acc:3645]	37.7066	18.9936	41.8423	1.13671	3.71253	3.7896	11.4069	3.51183	up
ko05168	Herpes simplex virus 1 infection	0.791075	ENSRNOG00000010278	Il6	K05405	NA	interleukin 6 [Source:RGD Symbol;Acc:2901]	3.16485	2.11915	11.0231	0.105601	0.098662	0.045109	65.3927	6.03106	up
ko05168	Herpes simplex virus 1 infection	0.791075	ENSRNOG00000029768	Ccl12	K14624	NA	chemokine (C-C motif) ligand 12 [Source:RGD Symbol;Acc:1309255]	6.0007	2.47451	2.57848	0.194217	0.89901	0.367082	7.56941	2.92018	up
ko01524	Platinum drug resistance	0.800441	ENSRNOG00000012878	Atp7b	K17686	EC:7.2.2.8	ATPase copper transporting beta [Source:RGD Symbol;Acc:2180]	0.320325	0.146971	0.19402	0.561531	0.322591	3.50668	0.150614	-2.73107	down
ko01521	EGFR tyrosine kinase inhibitor resistance	0.804545	ENSRNOG00000010278	Il6	K05405	NA	interleukin 6 [Source:RGD Symbol;Acc:2901]	3.16485	2.11915	11.0231	0.105601	0.098662	0.045109	65.3927	6.03106	up
ko05012	Parkinson disease	0.805487	ENSRNOG00000008656	Snca	K04528	NA	synuclein alpha [Source:RGD Symbol;Acc:3729]	0.033831	0	0.067124	0.192924	0.624332	0.823897	0.0615147	-4.02293	down
ko05012	Parkinson disease	0.805487	ENSRNOG00000014656	Cox8b	K02273	NA	cytochrome c oxidase, subunit VIIIb [Source:RGD Symbol;Acc:2386]	0.277625	0.746188	0	1.76709	3.81586	10.2263	0.0647605	-3.94874	down
ko04810	Regulation of actin cytoskeleton	0.806264	ENSRNOG00000006569	Itgb8	K06591	NA	integrin subunit beta 8 [Source:RGD Symbol;Acc:1311374]	2.69064	1.81036	3.42008	0.970632	0.984076	0.573387	3.13322	1.64765	up
ko04810	Regulation of actin cytoskeleton	0.806264	ENSRNOG00000014409	Myl7	K12754	NA	myosin light chain 7 [Source:RGD Symbol;Acc:1308262]	0.119219	0.0167495	0.0100427	0.0271121	0.0105536	57.8738	0.00252129	-8.63162	down
ko04810	Regulation of actin cytoskeleton	0.806264	ENSRNOG00000018991	Gsn	K05768	NA	gelsolin [Source:RGD Symbol;Acc:1303089]	421.812	450.543	281.254	941.528	460.793	1133.21	0.454977	-1.13614	down
ko04072	Phospholipase D signaling pathway	0.808525	ENSRNOG00000004400	Avpr1a	K04226	NA	arginine vasopressin receptor 1A [Source:RGD Symbol;Acc:2185]	0.884247	0.991065	0.583946	1.63749	2.34024	1.80556	0.425235	-1.23367	down
ko04072	Phospholipase D signaling pathway	0.808525	ENSRNOG00000059479	Adcy1	K08041	EC:4.6.1.1	adenylate cyclase 1 [Source:RGD Symbol;Acc:1309318]	0.206208	0.356452	0.124273	1.21653	0.813194	0.51294	0.270163	-1.8881	down
ko04146	Peroxisome	0.81636	ENSRNOG00000019048	Sod2	K04564	EC:1.15.1.1	superoxide dismutase 2 [Source:RGD Symbol;Acc:3732]	144.337	78.5731	208.619	40.7461	61.5904	73.5054	2.45407	1.29518	up
ko03008	Ribosome biogenesis in eukaryotes	0.81636	ENSRNOG00000049622	LOC103690013	K11129	NA	H/ACA ribonucleoprotein complex subunit 2 [Source:RGD Symbol;Acc:9459675]	19.5084	16.4796	22.3871	2.85616	11.3976	5.26966	2.99	1.58015	up
ko05161	Hepatitis B	0.82309	ENSRNOG00000000640	Egr2	K12496	NA	early growth response 2 [Source:RGD Symbol;Acc:621608]	3.15739	6.1992	6.47142	1.3654	1.96587	0.959568	3.68879	1.88315	up
ko05161	Hepatitis B	0.82309	ENSRNOG00000010278	Il6	K05405	NA	interleukin 6 [Source:RGD Symbol;Acc:2901]	3.16485	2.11915	11.0231	0.105601	0.098662	0.045109	65.3927	6.03106	up
ko04217	Necroptosis	0.828635	ENSRNOG00000004649	Il1b	K04519	NA	interleukin 1 beta [Source:RGD Symbol;Acc:2891]	17.0922	15.7097	15.266	6.22867	5.3594	4.98742	2.89994	1.53602	up
ko04217	Necroptosis	0.828635	ENSRNOG00000019183	Alox15	K00460	EC:1.13.11.33	arachidonate 15-lipoxygenase [Source:RGD Symbol;Acc:70493]	3.17012	1.75927	2.65063	3.59856	4.73835	17.0034	0.299129	-1.74116	down
ko04666	Fc gamma R-mediated phagocytosis	0.831017	ENSRNOG00000018991	Gsn	K05768	NA	gelsolin [Source:RGD Symbol;Acc:1303089]	421.812	450.543	281.254	941.528	460.793	1133.21	0.454977	-1.13614	down
ko04727	GABAergic synapse	0.834496	ENSRNOG00000059479	Adcy1	K08041	EC:4.6.1.1	adenylate cyclase 1 [Source:RGD Symbol;Acc:1309318]	0.206208	0.356452	0.124273	1.21653	0.813194	0.51294	0.270163	-1.8881	down
ko05200	Pathways in cancer	0.835429	ENSRNOG00000004537	Rxrg	K08526	NA	retinoid X receptor gamma [Source:RGD Symbol;Acc:620046]	0.784535	1.26834	0.531943	2.96272	1.86653	2.04611	0.375954	-1.41137	down
ko05200	Pathways in cancer	0.835429	ENSRNOG00000010278	Il6	K05405	NA	interleukin 6 [Source:RGD Symbol;Acc:2901]	3.16485	2.11915	11.0231	0.105601	0.098662	0.045109	65.3927	6.03106	up
ko05200	Pathways in cancer	0.835429	ENSRNOG00000014117	Hmox1	K00510	EC:1.14.14.18	heme oxygenase 1 [Source:RGD Symbol;Acc:2806]	551.077	151.281	396.168	31.9406	70.2869	56.3487	6.92743	2.79232	up
ko05200	Pathways in cancer	0.835429	ENSRNOG00000029980	Zbtb16	K10055	NA	zinc finger and BTB domain containing 16 [Source:RGD Symbol;Acc:727921]	2.73773	1.60881	0.909087	49.7177	4.1456	27.6044	0.0645117	-3.95429	down
ko05200	Pathways in cancer	0.835429	ENSRNOG00000031955	Calml3	K02183	NA	calmodulin-like 3 [Source:RGD Symbol;Acc:1305499]	8.24095	6.21762	6.22888	7.09436	20.7509	26.911	0.37781	-1.40427	down
ko05200	Pathways in cancer	0.835429	ENSRNOG00000056129	LOC102554659	K06247	NA	laminin subunit gamma-3-like [Source:RGD Symbol;Acc:7518353]	0.143205	0.092271	0.140703	0.90736	0.821992	0.418494	0.175142	-2.5134	down
ko05200	Pathways in cancer	0.835429	ENSRNOG00000059479	Adcy1	K08041	EC:4.6.1.1	adenylate cyclase 1 [Source:RGD Symbol;Acc:1309318]	0.206208	0.356452	0.124273	1.21653	0.813194	0.51294	0.270163	-1.8881	down
ko05200	Pathways in cancer	0.835429	ENSRNOG00000059507	Lamc3	K06247	NA	laminin subunit gamma 3 [Source:RGD Symbol;Acc:1309399]	0.642198	0.669721	0.48091	3.66613	1.70261	2.05931	0.241359	-2.05075	down
ko04914	Progesterone-mediated oocyte maturation	0.837904	ENSRNOG00000059479	Adcy1	K08041	EC:4.6.1.1	adenylate cyclase 1 [Source:RGD Symbol;Acc:1309318]	0.206208	0.356452	0.124273	1.21653	0.813194	0.51294	0.270163	-1.8881	down
ko03015	mRNA surveillance pathway	0.844512	ENSRNOG00000058202	Ppp2r2c	K04354	NA	protein phosphatase 2, regulatory subunit B, gamma [Source:RGD Symbol;Acc:620920]	2.33288	2.81765	3.45571	0.925882	1.19049	0.648675	3.11251	1.63808	up
ko05032	Morphine addiction	0.847715	ENSRNOG00000059479	Adcy1	K08041	EC:4.6.1.1	adenylate cyclase 1 [Source:RGD Symbol;Acc:1309318]	0.206208	0.356452	0.124273	1.21653	0.813194	0.51294	0.270163	-1.8881	down
ko01522	Endocrine resistance	0.856936	ENSRNOG00000059479	Adcy1	K08041	EC:4.6.1.1	adenylate cyclase 1 [Source:RGD Symbol;Acc:1309318]	0.206208	0.356452	0.124273	1.21653	0.813194	0.51294	0.270163	-1.8881	down
ko04080	Neuroactive ligand-receptor interaction	0.865903	ENSRNOG00000004400	Avpr1a	K04226	NA	arginine vasopressin receptor 1A [Source:RGD Symbol;Acc:2185]	0.884247	0.991065	0.583946	1.63749	2.34024	1.80556	0.425235	-1.23367	down
ko04080	Neuroactive ligand-receptor interaction	0.865903	ENSRNOG00000004404	Tac4	K05241	NA	tachykinin 4 [Source:RGD Symbol;Acc:628842]	5.30119	5.34132	4.09235	2.20134	1.05591	2.37838	2.61459	1.38659	up
ko04080	Neuroactive ligand-receptor interaction	0.865903	ENSRNOG00000013887	Adra2b	K04139	NA	adrenoceptor alpha 2B [Source:RGD Symbol;Acc:2057]	0.323727	0.349478	0.234101	1.5404	0.988549	0.490279	0.300509	-1.73452	down
ko04080	Neuroactive ligand-receptor interaction	0.865903	ENSRNOG00000018827	LOC103694905	K04163	NA	5-hydroxytryptamine receptor 7 [Source:RGD Symbol;Acc:9265298]	0.601136	0.302224	0.67299	0.0940072	0.184716	0.168906	3.52156	1.81621	up
ko04724	Glutamatergic synapse	0.905727	ENSRNOG00000059479	Adcy1	K08041	EC:4.6.1.1	adenylate cyclase 1 [Source:RGD Symbol;Acc:1309318]	0.206208	0.356452	0.124273	1.21653	0.813194	0.51294	0.270163	-1.8881	down
ko05322	Systemic lupus erythematosus	0.911454	ENSRNOG00000011971	C1s	K01331	EC:3.4.21.42	complement C1s [Source:RGD Symbol;Acc:619983]	123.565	79.6933	122.779	24.7306	61.2609	68.3441	2.11252	1.07897	up
ko04071	Sphingolipid signaling pathway	0.920241	ENSRNOG00000058202	Ppp2r2c	K04354	NA	protein phosphatase 2, regulatory subunit B, gamma [Source:RGD Symbol;Acc:620920]	2.33288	2.81765	3.45571	0.925882	1.19049	0.648675	3.11251	1.63808	up
ko04110	Cell cycle	0.923508	ENSRNOG00000033153	Sfn	K06644	NA	stratifin [Source:RGD Symbol;Acc:1304729]	22.9356	14.9716	33.5055	3.6868	3.29296	10.7613	4.02529	2.00909	up
ko04926	Relaxin signaling pathway	0.929649	ENSRNOG00000059479	Adcy1	K08041	EC:4.6.1.1	adenylate cyclase 1 [Source:RGD Symbol;Acc:1309318]	0.206208	0.356452	0.124273	1.21653	0.813194	0.51294	0.270163	-1.8881	down
ko04210	Apoptosis	0.937953	ENSRNOG00000048169	Tuba8	K07374	NA	tubulin, alpha 8 [Source:RGD Symbol;Acc:1566041]	3.55351	3.77764	3.98149	1.19674	1.13894	1.48065	2.96428	1.56768	up
ko05203	Viral carcinogenesis	0.937966	ENSRNOG00000000640	Egr2	K12496	NA	early growth response 2 [Source:RGD Symbol;Acc:621608]	3.15739	6.1992	6.47142	1.3654	1.96587	0.959568	3.68879	1.88315	up
ko05203	Viral carcinogenesis	0.937966	ENSRNOG00000018991	Gsn	K05768	NA	gelsolin [Source:RGD Symbol;Acc:1303089]	421.812	450.543	281.254	941.528	460.793	1133.21	0.454977	-1.13614	down
ko00190	Oxidative phosphorylation	0.93924	ENSRNOG00000014656	Cox8b	K02273	NA	cytochrome c oxidase, subunit VIIIb [Source:RGD Symbol;Acc:2386]	0.277625	0.746188	0	1.76709	3.81586	10.2263	0.0647605	-3.94874	down
ko04120	Ubiquitin mediated proteolysis	0.941733	ENSRNOG00000002946	Socs3	K04696	NA	suppressor of cytokine signaling 3 [Source:RGD Symbol;Acc:621087]	50.4008	65.1614	87.6908	40.5991	23.2455	16.4051	2.53276	1.34071	up
ko05226	Gastric cancer	0.949686	ENSRNOG00000004537	Rxrg	K08526	NA	retinoid X receptor gamma [Source:RGD Symbol;Acc:620046]	0.784535	1.26834	0.531943	2.96272	1.86653	2.04611	0.375954	-1.41137	down
ko04723	Retrograde endocannabinoid signaling	0.95656	ENSRNOG00000059479	Adcy1	K08041	EC:4.6.1.1	adenylate cyclase 1 [Source:RGD Symbol;Acc:1309318]	0.206208	0.356452	0.124273	1.21653	0.813194	0.51294	0.270163	-1.8881	down
ko04934	Cushing syndrome	0.960061	ENSRNOG00000059479	Adcy1	K08041	EC:4.6.1.1	adenylate cyclase 1 [Source:RGD Symbol;Acc:1309318]	0.206208	0.356452	0.124273	1.21653	0.813194	0.51294	0.270163	-1.8881	down
ko03010	Ribosome	0.968968	ENSRNOG00000032825	LOC100362027	K02908	NA	ribosomal protein L30 [Source:RGD Symbol;Acc:621201]	217.255	347.218	207.369	29.6581	57.4997	72.8836	4.82277	2.26986	up
ko04144	Endocytosis	0.969306	ENSRNOG00000007744	Ehd3	K12476	NA	EH-domain containing 3 [Source:RGD Symbol;Acc:621762]	3.25928	4.95947	3.3248	14.1598	7.02137	7.48551	0.402681	-1.31229	down
ko04144	Endocytosis	0.969306	ENSRNOG00000019890	Folr2	K13649	NA	folate receptor beta [Source:RGD Symbol;Acc:1308515]	19.4599	17.9835	15.3275	5.25219	6.19225	12.2248	2.22952	1.15673	up
ko05225	Hepatocellular carcinoma	0.97265	ENSRNOG00000014117	Hmox1	K00510	EC:1.14.14.18	heme oxygenase 1 [Source:RGD Symbol;Acc:2806]	551.077	151.281	396.168	31.9406	70.2869	56.3487	6.92743	2.79232	up
ko04360	Axon guidance	0.976402	ENSRNOG00000059857	Rnd1	K07531	NA	Rho family GTPase 1 [Source:RGD Symbol;Acc:1306338]	27.5036	15.5245	33.0023	7.92626	8.32134	9.04674	3.00583	1.58776	up
ko05205	Proteoglycans in cancer	0.985171	ENSRNOG00000045829	Thbs1	K16857	NA	thrombospondin 1 [Source:RGD Symbol;Acc:1588455]	69.4641	106.372	164.303	44.915	55.3273	28.7153	2.6376	1.39923	up
ko05169	Epstein-Barr virus infection	0.988	ENSRNOG00000010278	Il6	K05405	NA	interleukin 6 [Source:RGD Symbol;Acc:2901]	3.16485	2.11915	11.0231	0.105601	0.098662	0.045109	65.3927	6.03106	up
ko05170	Human immunodeficiency virus 1 infection	0.989207	ENSRNOG00000031955	Calml3	K02183	NA	calmodulin-like 3 [Source:RGD Symbol;Acc:1305499]	8.24095	6.21762	6.22888	7.09436	20.7509	26.911	0.37781	-1.40427	down
ko04740	Olfactory transduction	0.990118	ENSRNOG00000018606	Olr59	K04257	NA	olfactory receptor 59 [Source:RGD Symbol;Acc:628858]	1.22605	1.00656	1.51125	0.528759	0.534917	0.739663	2.07607	1.05386	up
ko04740	Olfactory transduction	0.990118	ENSRNOG00000031955	Calml3	K02183	NA	calmodulin-like 3 [Source:RGD Symbol;Acc:1305499]	8.24095	6.21762	6.22888	7.09436	20.7509	26.911	0.37781	-1.40427	down
